# Supplementary material for: A computational investigation towards substitution effects on 8π electrocyclisation of conjugated 1,3,5,7-octatetraenes
Source: Royal Society of Chemistry journal article supplement (doi:10.1039/d3ra05127g), 2023-01-01
Supplement: d3ra05127g1.pdf [file d3ra05127g1.pdf]

## Electronic Supplementary Information

### A computational investigation towards substitution effects on $8\pi$ electrocyclisation of conjugated 1,3,5,7-octatetraenes

Nur Hazimah B. Z. Arfan<sup>a</sup>, Malai Haniti S. A. Hamid<sup>a</sup>, Nadeem S. Sheikh<sup>a\*</sup>

<sup>a</sup>Chemical Sciences, Faculty of Science, Universiti Brunei Darussalam, Jalan Tungku Link  
Gadong BE 1410, Brunei Darussalam

\*Email: nadeem.sheikh@ubd.edu.bn

#### Table of Contents

|                                                       |    |
|-------------------------------------------------------|----|
| Electronic Supplementary Information.....             | 1  |
| 1. Complete citation for reference 23.....            | 3  |
| 2. Energies for unsubstituted system.....             | 3  |
| 2.1 Octatetraene (B3LYP).....                         | 3  |
| 2.2 Octatetraene (M06-2X).....                        | 4  |
| 3. Energies for monosubstituted system.....           | 4  |
| 3.1 1-substituted (outward).....                      | 4  |
| 3.2 1-substituted (inward).....                       | 5  |
| 3.3 2-substituted.....                                | 6  |
| 3.4 3-substituted.....                                | 7  |
| 3.5 4-substituted.....                                | 8  |
| 4. Energies for disubstituted system.....             | 9  |
| 4.1 1,2-substituted.....                              | 10 |
| 4.2 1,3-substituted.....                              | 12 |
| 4.3 1,4-substituted.....                              | 15 |
| 4.4 1,5-substituted.....                              | 18 |
| 4.5 1,6-substituted.....                              | 21 |
| 4.6 1,7-substituted.....                              | 24 |
| 4.7 1,8-substituted.....                              | 27 |
| 4.8 2,3-substituted.....                              | 29 |
| 4.9 2,4-substituted.....                              | 32 |
| 4.10 2,5-substituted.....                             | 35 |
| 4.11 2,6-substituted.....                             | 38 |
| 4.12 2,7-substituted.....                             | 41 |
| 4.13 3,4-substituted.....                             | 43 |
| 4.14 3,5-substituted.....                             | 46 |
| 4.15 3,6-substituted.....                             | 48 |
| 4.16 4,5-substituted.....                             | 50 |
| 5. Cartesian coordinates of transition structure..... | 52 |
| 5.1 Octatetraene.....                                 | 52 |

|        |                                          |     |
|--------|------------------------------------------|-----|
| 5.1.1  | Helical-shaped transition structure..... | 52  |
| 5.1.2  | Boat-shaped transition structure.....    | 53  |
| 5.2    | Monosubstituted.....                     | 53  |
| 5.2.1  | 1-substituted (outward).....             | 53  |
| 5.2.2  | 1-substituted (inward).....              | 56  |
| 5.2.3  | 2-substituted.....                       | 59  |
| 5.2.4  | 3-substituted.....                       | 63  |
| 5.2.5  | 4-substituted.....                       | 66  |
| 5.3    | Disubstituted.....                       | 69  |
| 5.3.1  | 1,2-substituted.....                     | 69  |
| 5.3.2  | 1,3-substituted.....                     | 94  |
| 5.3.4  | 1,4-substituted.....                     | 118 |
| 5.3.5  | 1,5-substituted.....                     | 143 |
| 5.3.6  | 1,6-substituted.....                     | 167 |
| 5.3.7  | 1,7-substituted.....                     | 191 |
| 5.3.8  | 1,8-substituted.....                     | 215 |
| 5.3.9  | 2,3-substituted.....                     | 228 |
| 5.3.10 | 2,4-substituted.....                     | 251 |
| 5.3.11 | 2,5-substituted.....                     | 276 |
| 5.3.12 | 2,6-substituted.....                     | 299 |
| 5.3.13 | 2,7-substituted.....                     | 323 |
| 5.3.14 | 3,4-substituted.....                     | 336 |
| 5.3.15 | 3,5-substituted.....                     | 360 |
| 5.2.16 | 3,6-substituted.....                     | 384 |
| 5.3.17 | 4,5-substituted.....                     | 398 |

## 1. Complete citation for reference 23

Gaussian 16, Revision C.01, M. J. Frisch, G. W. Trucks, H. B. Schlegel, G. E. Scuseria, M. A. Robb, J. R. Cheeseman, G. Scalmani, V. Barone, G. A. Petersson, H. Nakatsuji, X. Li, M. Caricato, A. V. Marenich, J. Bloino, B. G. Janesko, R. Gomperts, B. Mennucci, H. P. Hratchian, J. V. Ortiz, A. F. Izmaylov, J. L. Sonnenberg, D. Williams-Young, F. Ding, F. Lipparini, F. Egidi, J. Goings, B. Peng, A. Petrone, T. Henderson, D. Ranasinghe, V. G. Zakrzewski, J. Gao, N. Rega, G. Zheng, W. Liang, M. Hada, M. Ehara, K. Toyota, R. Fukuda, J. Hasegawa, M. Ishida, T. Nakajima, Y. Honda, O. Kitao, H. Nakai, T. Vreven, K. Throssell, J. A. Montgomery, Jr., J. E. Peralta, F. Ogliaro, M. J. Bearpark, J. J. Heyd, E. N. Brothers, K. N. Kudin, V. N. Staroverov, T. A. Keith, R. Kobayashi, J. Normand, K. Raghavachari, A. P. Rendell, J. C. Burant, S. S. Iyengar, J. Tomasi, M. Cossi, J. M. Millam, M. Klene, C. Adamo, R. Cammi, J. W. Ochterski, R. L. Martin, K. Morokuma, O. Farkas, J. B. Foresman, and D. J. Fox, Gaussian, Inc., Wallingford CT, 2019.

## 2. Energies for unsubstituted system

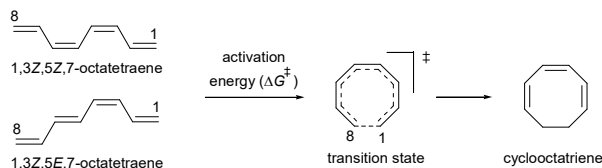

### 2.1 Octatetraene (B3LYP)

| Octatetraene [Starting Material], (Hartree) |             |                                |                                           |                                          |                               |
|---------------------------------------------|-------------|--------------------------------|-------------------------------------------|------------------------------------------|-------------------------------|
| Entry                                       | Basis Set   | Total Electronic Energy        | Sum of Electronic and Zero-Point Energies | Sum of Electronic and Thermal Enthalpies | Gibbs Free Energy             |
| 1                                           | 6-31G(d)    | -310.7992541<br>(-310.802614)  | -310.6460140<br>(-310.649570)             | -310.6362600<br>(-310.639816)            | -310.6792760<br>(-310.683320) |
| 2                                           | 6-31G+(d)   | -310.8143824<br>(-310.8175926) | -310.6615370<br>(-310.665035)             | -310.6517570<br>(-310.655236)            | -310.6948610<br>(-310.698864) |
| 3                                           | 6-31G(d,p)  | -310.8151320<br>(-310.8184987) | -310.6622150<br>(-310.665771)             | -310.6524460<br>(-310.656010)            | -310.6955120<br>(-310.699526) |
| 4                                           | 6-31G+(d,p) | -310.8303415<br>(-310.8335417) | -310.6778310<br>(-310.681309)             | -310.6680320<br>(-310.671495)            | -310.7111870<br>(-310.715155) |

| Transition State, (Hartree) |             |                                |                                           |                                          |                              |
|-----------------------------|-------------|--------------------------------|-------------------------------------------|------------------------------------------|------------------------------|
| Entry                       | Basis Set   | Total Electronic Energy        | Sum of Electronic and Zero-Point Energies | Sum of Electronic and Thermal Enthalpies | Gibbs Free Energy            |
| 1                           | 6-31G(d)    | -310.7736697<br>(-310.7275109) | -310.619182<br>(-310.575506)              | -310.611142<br>(-310.567369)             | -310.650172<br>(-310.606328) |
| 2                           | 6-31G+(d)   | -310.7877014<br>(-310.742398)  | -310.63349<br>(-310.590800)               | -310.625449<br>(-310.582615)             | -310.664473<br>(-310.621676) |
| 3                           | 6-31G(d,p)  | -310.7894664<br>(-310.7435959) | -310.635337<br>(-310.591949)              | -310.627291<br>(-310.583798)             | -310.666327<br>(-310.622778) |
| 4                           | 6-31G+(d,p) | -310.8033777<br>(-310.7583815) | -310.649528<br>(-310.607149)              | -310.641479<br>(-310.598944)             | -310.680511<br>(-310.638036) |

| Cyclooctatriene [Product], (Hartree) |             |                         |                                           |                                          |                   |
|--------------------------------------|-------------|-------------------------|-------------------------------------------|------------------------------------------|-------------------|
| Entry                                | Basis Set   | Total Electronic Energy | Sum of Electronic and Zero-Point Energies | Sum of Electronic and Thermal Enthalpies | Gibbs Free Energy |
| 1                                    | 6-31G(d)    | -310.8118501            | -310.6543740                              | -310.6464540                             | -310.6853160      |
| 2                                    | 6-31G+(d)   | -310.8244492            | -310.6673760                              | -310.6594350                             | -310.6983340      |
| 3                                    | 6-31G(d,p)  | -310.8270269            | -310.6699730                              | -310.6620390                             | -310.7009240      |
| 4                                    | 6-31G+(d,p) | -310.8393865            | -310.6827480                              | -310.6747900                             | -310.7137150      |

**Note:** Computed energies (Hartree) for conrotatory and disrotatory  $8\pi$  electrocyclic ring-closure of 1,3Z,5Z,7-octatetraene *via* helical-shaped TS and for 1,3Z,5E,7-octatetraene *via* boat-shaped TS (in parentheses) respectively, using B3LYP functional.

| Octatetraene [Starting Material], (Hartree) |             |                                |                                           |                                          |                              |
|---------------------------------------------|-------------|--------------------------------|-------------------------------------------|------------------------------------------|------------------------------|
| Entry                                       | Basis Set   | Total Electronic Energy        | Sum of Electronic and Zero-Point Energies | Sum of Electronic and Thermal Enthalpies | Gibbs Free Energy            |
| 1                                           | 6-31G(d)    | -310.6347999<br>(-310.6376588) | -310.47992<br>(-310.483068)               | -310.47021<br>(-310.473314)              | -310.513284<br>(-310.516854) |
| 2                                           | 6-31G+(d)   | -310.6466442<br>(-310.6493868) | -310.492255<br>(-310.495336)              | -310.482447<br>(-310.485503)             | -310.526022<br>(-310.529303) |
| 3                                           | 6-31G(d,p)  | -310.647605<br>(-310.650484)   | -310.493169<br>(-310.496341)              | -310.483452<br>(-310.486569)             | -310.526545<br>(-310.530164) |
| 4                                           | 6-31G+(d,p) | -310.6595008<br>(-310.6622439) | -310.505579<br>(-310.508656)              | -310.495747<br>(-310.498790)             | -310.539465<br>(-310.542698) |

| Transition State, (Hartree) |             |                                |                                           |                                          |                              |
|-----------------------------|-------------|--------------------------------|-------------------------------------------|------------------------------------------|------------------------------|
| Entry                       | Basis Set   | Total Electronic Energy        | Sum of Electronic and Zero-Point Energies | Sum of Electronic and Thermal Enthalpies | Gibbs Free Energy            |
| 1                           | 6-31G(d)    | -310.6121088<br>(-310.567316)  | -310.456417<br>(-310.413495)              | -310.448417<br>(-310.405542)             | -310.487321<br>(-310.444105) |
| 2                           | 6-31G+(d)   | -310.6232859<br>(-310.5790775) | -310.46797<br>(-310.425711)               | -310.459938<br>(-310.417710)             | -310.498913<br>(-310.456369) |
| 3                           | 6-31G(d,p)  | -310.624771<br>(-310.5801686)  | -310.469543<br>(-310.426830)              | -310.461545<br>(-310.418868)             | -310.500438<br>(-31.457443)  |
| 4                           | 6-31G+(d,p) | -310.6358264<br>(-310.5918)    | -310.480965<br>(-310.438924)              | -310.472935<br>(-310.430908)             | -310.511893<br>(-310.460589) |

| Cyclooctatriene [Product], (Hartree) |             |                         |                                           |                                          |                   |
|--------------------------------------|-------------|-------------------------|-------------------------------------------|------------------------------------------|-------------------|
| Entry                                | Basis Set   | Total Electronic Energy | Sum of Electronic and Zero-Point Energies | Sum of Electronic and Thermal Enthalpies | Gibbs Free Energy |
| 1                                    | 6-31G(d)    | -310.659532             | -310.500516                               | -310.492655                              | -310.531342       |
| 2                                    | 6-31G+(d)   | -310.6695176            | -310.510921                               | -310.503037                              | -310.541761       |
| 3                                    | 6-31G(d,p)  | -310.6715965            | -310.513147                               | -310.505275                              | -310.543973       |
| 4                                    | 6-31G+(d,p) | -310.6813312            | -310.523301                               | -310.515402                              | -310.554146       |

**Note:** Computed energies (Hartree) for conrotatory and disrotatory  $8\pi$  electrocyclic ring-closure of 1,3Z,5Z,7-octatetraene *via* helical-shaped TS and for 1,3Z,5E,7-octatetraene *via* boat-shaped TS (in parentheses) respectively, using M06-2X functional.

### 3. Energies for monosubstituted system

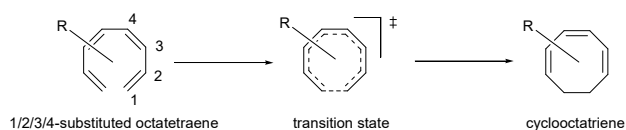

#### 3.1

#### 1-substituted (outward)

| Octatetraene [Starting Material], (Hartree) |                 |                                |                                           |                                          |                               |
|---------------------------------------------|-----------------|--------------------------------|-------------------------------------------|------------------------------------------|-------------------------------|
| Entry                                       | R               | Total Electronic Energy        | Sum of Electronic and Zero-Point Energies | Sum of Electronic and Thermal Enthalpies | Gibbs Free Energy             |
| 1                                           | CH <sub>3</sub> | -349.9451704<br>(-349.9599514) | -349.762745<br>(-349.778185)              | -349.751272<br>(-349.766689)             | -349.800777<br>(-349.816613)  |
| 2                                           | NH <sub>2</sub> | -365.9853984<br>(-366.0032139) | -365.813549<br>(-365.831912)              | -365.802451<br>(-365.820753)             | -365.8497100<br>(-365.868049) |
| 3                                           | OH              | -385.8448401<br>(-385.8600895) | -385.685698<br>(-385.701170)              | -385.675672<br>(-385.690270)             | -385.7199600<br>(-385.737015) |
| 4                                           | F               | -409.8578234<br>(-409.8695132) | -409.711304<br>(-409.723437)              | -409.701514<br>(-409.713627)             | -409.7456260<br>(-409.757804) |
| 5                                           | CHO             | -423.935885                    | -423.771711                               | -423.760869                              | -423.8075750                  |

|   |                 |                                |                              |                              |                               |
|---|-----------------|--------------------------------|------------------------------|------------------------------|-------------------------------|
|   |                 | (-423.9485292)                 | (-423.784877)                | (-423.774006)                | (-423.820810)                 |
| 6 | CN              | -402.8671404<br>(-402.8787128) | -402.713782<br>(-402.725820) | -402.702282<br>(-402.714288) | -402.7516770<br>(-402.763871) |
| 7 | NO <sub>2</sub> | -515.0833488<br>(-515.0949929) | -514.925328<br>(-514.937408) | -514.913232<br>(-514.925299) | -514.9642870<br>(-514.976360) |

| Transition State, (Hartree) |                 |                                |                                           |                                          |                              |
|-----------------------------|-----------------|--------------------------------|-------------------------------------------|------------------------------------------|------------------------------|
| Entry                       | R               | Total Electronic Energy        | Sum of Electronic and Zero-Point Energies | Sum of Electronic and Thermal Enthalpies | Gibbs Free Energy            |
| 1                           | CH <sub>3</sub> | -349.921311<br>(-349.9358089)  | -349.73729<br>(-349.752425)               | -349.727769<br>(-349.742898)             | -349.770133<br>(-349.785262) |
| 2                           | NH <sub>2</sub> | -365.9594694<br>(-365.976968)  | -365.786617<br>(-365.804791)              | -365.777297<br>(-365.795348)             | -365.819071<br>(-365.837332) |
| 3                           | OH              | -385.8205407<br>(-385.837376)  | -385.660058<br>(-385.677181)              | -385.651071<br>(-385.668193)             | -385.692383<br>(-385.709499) |
| 4                           | F               | -409.8348242<br>(-409.8462151) | -409.687028<br>(-409.698873)              | -409.678243<br>(-409.690081)             | -409.719367<br>(-409.731213) |
| 5                           | CHO             | -423.9119541<br>(-423.923224)  | -423.746413<br>(-423.758160)              | -423.736513<br>(-423.748153)             | -423.780432<br>(-423.792344) |
| 6                           | CN              | -402.8436267<br>(-402.8548999) | -402.688991<br>(-402.700714)              | -402.679333<br>(-402.691050)             | -402.72264<br>(-402.734362)  |
| 7                           | NO <sub>2</sub> | -515.0611812<br>(-515.0725215) | -514.902119<br>(-514.913907)              | -514.891687<br>(-514.903472)             | -514.937376<br>(-514.949154) |

| Cyclooctatriene [Product], (Hartree) |                 |                                |                                           |                                          |                               |
|--------------------------------------|-----------------|--------------------------------|-------------------------------------------|------------------------------------------|-------------------------------|
| Entry                                | R               | Total Electronic Energy        | Sum of Electronic and Zero-Point Energies | Sum of Electronic and Thermal Enthalpies | Gibbs Free Energy             |
| 1                                    | CH <sub>3</sub> | -349.9647373<br>(-349.9786163) | -349.777731<br>(-349.792308)              | -349.768543<br>(-349.783102)             | -349.8101930<br>(-349.824782) |
| 2                                    | NH <sub>2</sub> | -365.9980677<br>(-366.0144252) | -365.821834<br>(-365.838767)              | -365.812832<br>(-365.829738)             | -365.8541080<br>(-365.871054) |
| 3                                    | OH              | -385.8635893<br>(-385.8796379) | -385.700225<br>(-385.716704)              | -385.691319<br>(-385.707767)             | -385.7325360<br>(-385.749042) |
| 4                                    | F               | -409.8840559<br>(-409.8948483) | -409.732963<br>(-409.744280)              | -409.724417<br>(-409.735715)             | -409.7650450<br>(-409.776377) |
| 5                                    | CHO             | -423.9488377<br>(-423.9604803) | -423.781317<br>(-423.792894)              | -423.771435<br>(-423.782996)             | -423.815605<br>(-423.827348)  |
| 6                                    | CN              | -402.8839501<br>(-402.8947723) | -402.726409<br>(-402.737723)              | -402.716890<br>(-402.728191)             | -402.7598750<br>(-402.771196) |
| 7                                    | NO <sub>2</sub> | -515.1064451<br>(-515.1173435) | -514.944362<br>(-514.955774)              | -514.934203<br>(-514.945601)             | -514.9795140<br>(-514.990929) |

**Note:** Computed energies (Hartree) for 8 $\pi$  electrocyclic ring-closure of 1,3,5,7-octatetraene using M06-2X/6-31+G(d) and M06-2X/6-31+G(d,p) (in parentheses).

### 3.2 1-substituted (inward)

| Octatetraene [Starting Material], (Hartree) |                 |                                |                                           |                                          |                               |
|---------------------------------------------|-----------------|--------------------------------|-------------------------------------------|------------------------------------------|-------------------------------|
| Entry                                       | R               | Total Electronic Energy        | Sum of Electronic and Zero-Point Energies | Sum of Electronic and Thermal Enthalpies | Gibbs Free Energy             |
| 1                                           | CH <sub>3</sub> | -349.9428887<br>(-349.9576975) | -349.760592<br>(-349.776017)              | -349.749047<br>(-349.764478)             | -349.7984050<br>(-349.813688) |
| 2                                           | NH <sub>2</sub> | -365.98451<br>(-366.0023442)   | -365.812373<br>(-365.830713)              | -365.801297<br>(-365.819599)             | -365.8486450<br>(-365.867005) |
| 3                                           | OH              | -385.8441906<br>(-385.8607759) | -385.684434<br>(-385.701947)              | -385.673722<br>(-385.690965)             | -385.7204080<br>(-385.738404) |
| 4                                           | F               | -409.8586081<br>(-409.8703154) | -409.712234<br>(-409.724363)              | -409.702432<br>(-409.714555)             | -409.747448<br>(-409.759524)  |
| 5                                           | CHO             | -423.9310747                   | -423.766996                               | -423.756116                              | 423.803684                    |

|   |                 |                                |                              |                              |                               |
|---|-----------------|--------------------------------|------------------------------|------------------------------|-------------------------------|
|   |                 | (-423.9437075)                 | (-423.779958)                | (-423.768208)                | (-423.818024)                 |
| 6 | CN              | -402.8674395<br>(-402.8790409) | -402.714196<br>(-402.726224) | -402.703590<br>(-402.715611) | -402.7504780<br>(-402.762435) |
| 7 | NO <sub>2</sub> | -515.079366<br>(-515.0910253)  | -514.921728<br>(-514.933819) | -514.910375<br>(-514.922461) | -514.9598880<br>(-514.971973) |

| Transition State, (Hartree) |                 |                                |                                           |                                          |                              |
|-----------------------------|-----------------|--------------------------------|-------------------------------------------|------------------------------------------|------------------------------|
| Entry                       | R               | Total Electronic Energy        | Sum of Electronic and Zero-Point Energies | Sum of Electronic and Thermal Enthalpies | Gibbs Free Energy            |
| 1                           | CH <sub>3</sub> | -349.9175407<br>(-349.9320751) | -349.733086<br>(-349.748285)              | -349.723824<br>(-349.739005)             | -349.765383<br>(-349.780596) |
| 2                           | NH <sub>2</sub> | -365.9651042<br>(-365.9821745) | -365.79139<br>(-365.808920)               | -365.782524<br>(-365.800052)             | -365.823116<br>(-365.840633) |
| 3                           | OH              | -385.8259145<br>(-385.842474)  | -385.665<br>(-385.681874)                 | -385.656302<br>(-385.673175)             | -385.69666<br>(-385.713532)  |
| 4                           | F               | -409.8334281<br>(-409.8447524) | -409.685255<br>(-409.697024)              | -409.676711<br>(-409.688472)             | -409.71699<br>(-409.728760)  |
| 5                           | CHO             | -423.9069521<br>(-423.9179264) | -423.741341<br>(-423.752827)              | -423.731472<br>(-423.743069)             | -423.775227<br>(-423.786057) |
| 6                           | CN              | -402.8401109<br>(-402.8513614) | -402.685662<br>(-402.697367)              | -402.676107<br>(-402.687806)             | -402.718722<br>(-402.730425) |
| 7                           | NO <sub>2</sub> | -515.0552824<br>(-515.0665621) | -514.896222<br>(-514.907941)              | -514.886015<br>(-514.897731)             | -514.930468<br>(-514.942177) |

| Cyclooctatriene [Product], (Hartree) |                 |                                |                                           |                                          |                               |
|--------------------------------------|-----------------|--------------------------------|-------------------------------------------|------------------------------------------|-------------------------------|
| Entry                                | R               | Total Electronic Energy        | Sum of Electronic and Zero-Point Energies | Sum of Electronic and Thermal Enthalpies | Gibbs Free Energy             |
| 1                                    | CH <sub>3</sub> | -349.9647373<br>(-349.9786163) | -349.777731<br>(-349.792308)              | -349.768543<br>(-349.783102)             | -349.8101930<br>(-349.824782) |
| 2                                    | NH <sub>2</sub> | -365.9980677<br>(-366.0144252) | -365.821834<br>(-365.838767)              | -365.812832<br>(-365.829738)             | -365.8541080<br>(-365.871054) |
| 3                                    | OH              | -385.8635893<br>(-385.8796379) | -385.700225<br>(-385.716704)              | -385.691319<br>(-385.707767)             | -385.7325360<br>(-385.749042) |
| 4                                    | F               | -409.8840559<br>(-409.8948483) | -409.732963<br>(-409.744280)              | -409.724417<br>(-409.735715)             | -409.7650450<br>(-409.776377) |
| 5                                    | CHO             | -423.9488377<br>(-423.9604803) | -423.781317<br>(-423.792894)              | -423.771435<br>(-423.782996)             | -423.815605<br>(-423.827348)  |
| 6                                    | CN              | -402.8839501<br>(-402.8947723) | -402.726409<br>(-402.737723)              | -402.716890<br>(-402.728191)             | -402.7598750<br>(-402.771196) |
| 7                                    | NO <sub>2</sub> | -515.1064451<br>(-515.1173435) | -514.944362<br>(-514.955774)              | -514.934203<br>(-514.945601)             | -514.9795140<br>(-514.990929) |

**Note:** Computed energies (Hartree) for 8 $\pi$  electrocyclic ring-closure of 1,3,5,7-octatetraene using M06-2X/6-31+G(d) and M06-2X/6-31+G(d,p) (in parentheses).

### 3.3 2-substituted

| Octatetraene [Starting Material], (Hartree) |                 |                                |                                           |                                          |                               |
|---------------------------------------------|-----------------|--------------------------------|-------------------------------------------|------------------------------------------|-------------------------------|
| Entry                                       | R               | Total Electronic Energy        | Sum of Electronic and Zero-Point Energies | Sum of Electronic and Thermal Enthalpies | Gibbs Free Energy             |
| 1                                           | CH <sub>3</sub> | -349.9406453<br>(-349.95541)   | -349.75733<br>(-349.772746)               | -349.746327<br>(-349.761734)             | -349.7940980<br>(-349.809358) |
| 2                                           | NH <sub>2</sub> | -365.9818596<br>(-365.9993809) | -365.809765<br>(-365.827731)              | -365.799032<br>(-365.816987)             | -365.8451610<br>(-365.863129) |
| 3                                           | OH              | -385.8449307<br>(-385.8620599) | -385.686065<br>(-385.703590)              | -385.675216<br>(-385.692669)             | -385.7226010<br>(-385.740532) |
| 4                                           | F               | -409.8602516<br>(-409.8719872) | -409.713975<br>(-409.726116)              | -409.704324<br>(-409.716461)             | -409.7482250<br>(-409.760356) |

|   |                 |                                |                              |                              |                               |
|---|-----------------|--------------------------------|------------------------------|------------------------------|-------------------------------|
| 5 | CHO             | -423.9264695<br>(-423.9391896) | -423.762433<br>(-423.775616) | -423.750919<br>(-423.764100) | -423.7997550<br>(-423.812916) |
| 6 | CN              | -402.8604556<br>(-402.8720991) | -402.707042<br>(-402.719108) | -402.695663<br>(-402.707718) | -402.7446380<br>(-402.756692) |
| 7 | NO <sub>2</sub> | -515.0728411<br>(-515.0845738) | -514.915484<br>(-514.927672) | -514.903445<br>(-514.915611) | -514.9542880<br>(-514.966543) |

| Transition State, (Hartree) |                 |                                |                                           |                                          |                              |
|-----------------------------|-----------------|--------------------------------|-------------------------------------------|------------------------------------------|------------------------------|
| Entry                       | R               | Total Electronic Energy        | Sum of Electronic and Zero-Point Energies | Sum of Electronic and Thermal Enthalpies | Gibbs Free Energy            |
| 1                           | CH <sub>3</sub> | -349.9205965<br>(-349.9350441) | -349.737246<br>(-349.752340)              | -349.727498<br>(-349.742594)             | -349.770963<br>(-349.785984) |
| 2                           | NH <sub>2</sub> | -365.9598301<br>(-365.9772379) | -365.787469<br>(-365.805414)              | -365.778049<br>(-365.795963)             | -365.820149<br>(-365.838098) |
| 3                           | OH              | -385.8218248<br>(-385.8386702) | -385.661863<br>(-385.679027)              | -385.661863<br>(-385.669963)             | -385.694214<br>(-385.711379) |
| 4                           | F               | -409.8383446<br>(-409.8496605) | -409.690817<br>(-409.702584)              | -409.682069<br>(-409.693832)             | -409.723068<br>(-409.734829) |
| 5                           | CHO             | -423.9128654<br>(-423.9252484) | -423.747702<br>(-423.760586)              | -423.737783<br>(-423.750664)             | -423.781623<br>(-423.794494) |
| 6                           | CN              | -402.8427917<br>(-402.8540637) | -402.688363<br>(-402.700095)              | -402.678621<br>(-402.690346)             | -402.722064<br>(-402.733797) |
| 7                           | NO <sub>2</sub> | -515.0616633<br>(-515.0730874) | -514.902697<br>(-514.914561)              | -514.892294<br>(-514.904160)             | -514.938023<br>(-514.949862) |

| Cyclooctatetraene [Product], (Hartree) |                 |                                |                                           |                                          |                               |
|----------------------------------------|-----------------|--------------------------------|-------------------------------------------|------------------------------------------|-------------------------------|
| Entry                                  | R               | Total Electronic Energy        | Sum of Electronic and Zero-Point Energies | Sum of Electronic and Thermal Enthalpies | Gibbs Free Energy             |
| 1                                      | CH <sub>3</sub> | -349.9675489<br>(-349.9813001) | -349.78102<br>(-349.795508)               | -349.771603<br>(-349.786073)             | -349.8138120<br>(-349.828305) |
| 2                                      | NH <sub>2</sub> | -366.0084349<br>(-366.0250531) | -365.832706<br>(-365.849968)              | -365.823532<br>(-365.840743)             | -365.8651260<br>(-365.882414) |
| 3                                      | OH              | -385.8720389<br>(-385.8881079) | -385.708835<br>(-385.725345)              | -385.699945<br>(-385.716427)             | -385.7410460<br>(-385.757572) |
| 4                                      | F               | -409.8883096<br>(-409.8989117) | -409.737671<br>(-409.748822)              | -409.729994<br>(-409.740183)             | -409.7697740<br>(-409.780936) |
| 5                                      | CHO             | -423.9613637<br>(-423.973059)  | -423.792781<br>(-423.805077)              | -423.783065<br>(-423.795343)             | -423.8265050<br>(-423.838821) |
| 6                                      | CN              | -402.8896555<br>(-402.9002001) | -402.732230<br>(-402.743292)              | -402.722625<br>(-402.733675)             | -402.7657840<br>(-402.776851) |
| 7                                      | NO <sub>2</sub> | -515.1087095<br>(-515.1193953) | -514.946686<br>(-514.957915)              | -514.936468<br>(-514.947681)             | -514.9817350<br>(-514.992971) |

**Note:** Computed energies (Hartree) for 8 $\pi$  electrocyclic ring-closure of 1,3,5,7-octatetraene using M06-2X/6-31+G(d) and M06-2X/6-31+G(d,p) (in parentheses).

#### 3.4 3-substituted

| Octatetraene [Starting Material], (Hartree) |                 |                                |                                           |                                          |                               |
|---------------------------------------------|-----------------|--------------------------------|-------------------------------------------|------------------------------------------|-------------------------------|
| Entry                                       | R               | Total Electronic Energy        | Sum of Electronic and Zero-Point Energies | Sum of Electronic and Thermal Enthalpies | Gibbs Free Energy             |
| 1                                           | CH <sub>3</sub> | -349.944538<br>(-349.9593215)  | -349.762154<br>(-349.777547)              | -349.75086<br>(-349.766263)              | -349.7985320<br>(-349.813838) |
| 2                                           | NH <sub>2</sub> | -365.9842884<br>(-366.0019283) | -365.812628<br>(-365.830745)              | -365.801698<br>(-365.819796)             | -365.8481930<br>(-365.866321) |
| 3                                           | OH              | -385.8461517<br>(-385.8613832) | -385.687394<br>(-385.703015)              | -385.676554<br>(-385.692202)             | -385.723111<br>(-385.738652)  |

|   |                 |                                |                              |                              |                               |
|---|-----------------|--------------------------------|------------------------------|------------------------------|-------------------------------|
| 4 | F               | -409.8615425<br>(-409.8732058) | -409.726527<br>(-409.728031) | -409.706003<br>(-409.718126) | -409.7506980<br>(-409.762763) |
| 5 | CHO             | -423.9328526<br>(-423.9433634) | -423.768903<br>(-423.779664) | -423.757970<br>(-423.768009) | -423.805244<br>(-423.816823)  |
| 6 | CN              | -402.8656483<br>(-402.8772657) | -402.712479<br>(-402.724470) | -402.700994<br>(-402.712983) | -402.7496790<br>(-402.761674) |
| 7 | NO <sub>2</sub> | -515.0772119<br>(-515.0889297) | -514.919741<br>(-514.931904) | -514.909200<br>(-514.921351) | -514.9560780<br>(-514.968252) |

| Transition State, (Hartree) |                 |                                |                                           |                                          |                              |
|-----------------------------|-----------------|--------------------------------|-------------------------------------------|------------------------------------------|------------------------------|
| Entry                       | R               | Total Electronic Energy        | Sum of Electronic and Zero-Point Energies | Sum of Electronic and Thermal Enthalpies | Gibbs Free Energy            |
| 1                           | CH <sub>3</sub> | -349.9181166<br>(-349.9325615) | -349.734735<br>(-349.749842)              | -349.725024<br>(-349.740114)             | -349.768122<br>(-349.783273) |
| 2                           | NH <sub>2</sub> | -365.9573047<br>(-365.9746758) | -365.784819<br>(-365.802715)              | -365.775445<br>(-365.793313)             | -365.817295<br>(-365.835188) |
| 3                           | OH              | -385.8197025<br>(-385.8372372) | -385.660182<br>(-385.677407)              | -385.650963<br>(-385.668402)             | -385.692612<br>(-385.709595) |
| 4                           | F               | -409.8383007<br>(-409.8495934) | -409.690928<br>(-409.702689)              | -409.682186<br>(-409.693939)             | -409.723058<br>(-409.734818) |
| 5                           | CHO             | -423.913238<br>(-423.9256419)  | -423.747826<br>(-423.760712)              | -423.737967<br>(-423.750859)             | -423.781537<br>(-423.794402) |
| 6                           | CN              | -402.8418975<br>(-402.8531729) | -402.687633<br>(-402.699355)              | -402.677878<br>(-402.689597)             | -402.721229<br>(-402.732943) |
| 7                           | NO <sub>2</sub> | -515.0598415<br>(-515.0712428) | -514.901116<br>(-514.912971)              | -514.890660<br>(-514.902508)             | -514.936822<br>(-514.948708) |

| Cyclooctatriene [Product], (Hartree) |                 |                                |                                           |                                          |                               |
|--------------------------------------|-----------------|--------------------------------|-------------------------------------------|------------------------------------------|-------------------------------|
| Entry                                | R               | Total Electronic Energy        | Sum of Electronic and Zero-Point Energies | Sum of Electronic and Thermal Enthalpies | Gibbs Free Energy             |
| 1                                    | CH <sub>3</sub> | -349.965701<br>(-349.9794009)  | -349.778922<br>(-349.793349)              | -349.769526<br>(-349.783935)             | -349.8116880<br>(-349.826123) |
| 2                                    | NH <sub>2</sub> | -366.0008621<br>(-366.0174442) | -365.825483<br>(-365.842632)              | -365.81608<br>(-365.833218)              | -365.8582540<br>(-365.875368) |
| 3                                    | OH              | -385.8662872<br>(-385.8817801) | -385.702976<br>(-385.719150)              | -385.694063<br>(-385.710123)             | -385.735222<br>(-385.751473)  |
| 4                                    | F               | -409.8852026<br>(-409.8957562) | -409.734297<br>(-409.745384)              | -409.725707<br>(-409.736780)             | -409.7663700<br>(-409.777464) |
| 5                                    | CHO             | -423.9596747<br>(-423.9679286) | -423.791346<br>(-423.800129)              | -423.781590<br>(-423.790331)             | -423.825161<br>(-423.833921)  |
| 6                                    | CN              | -402.8878316<br>(-402.8983854) | -402.730507<br>(-402.741575)              | -402.720869<br>(-402.731926)             | -402.7641980<br>(-402.775267) |
| 7                                    | NO <sub>2</sub> | -515.1065207<br>(-515.1172205) | -514.944904<br>(-514.956133)              | -514.934588<br>(-514.945803)             | -514.9803280<br>(-514.991565) |

**Note:** Computed energies (Hartree) for 8 $\pi$  electrocyclic ring-closure of 1,3,5,7-octatetraene using M06-2X/6-31+G(d) and M06-2X/6-31+G(d,p) (in parentheses).

### 3.5 4-substituted

| Octatetraene [Starting Material], (Hartree) |                 |                                |                                           |                                          |                               |
|---------------------------------------------|-----------------|--------------------------------|-------------------------------------------|------------------------------------------|-------------------------------|
| Entry                                       | R               | Total Electronic Energy        | Sum of Electronic and Zero-Point Energies | Sum of Electronic and Thermal Enthalpies | Gibbs Free Energy             |
| 1                                           | CH <sub>3</sub> | -349.9396727<br>(-349.9544471) | -349.756949<br>(-349.772362)              | -349.745696<br>(-349.761122)             | -349.7943360<br>(-349.809598) |
| 2                                           | NH <sub>2</sub> | -365.9821376<br>(-365.9996359) | -365.81034<br>(-365.828381)               | -365.799506<br>(-365.817518)             | -365.8456570<br>(-365.863738) |
| 3                                           | OH              | -385.8440233<br>(-385.8610996) | -385.68565<br>(-385.703106)               | -385.675509<br>(-385.692916)             | -385.7200390<br>(-385.737522) |



|   |                 |                                |                              |                              |                               |
|---|-----------------|--------------------------------|------------------------------|------------------------------|-------------------------------|
| 4 | F               | -409.859808<br>(-409.8714826)  | -409.713842<br>(-409.725928) | -409.704089<br>(-409.716173) | -409.7478080<br>(-409.759875) |
| 5 | CHO             | -423.9298162<br>(-423.9425228) | -423.765864<br>(-423.779054) | -423.754330<br>(-423.767508) | -423.8027360<br>(-423.815935) |
| 6 | CN              | -402.8617762<br>(-402.8734067) | -402.708817<br>(-402.720871) | -402.698156<br>(-402.710204) | -402.7440630<br>(-402.756115) |
| 7 | NO <sub>2</sub> | -515.0757224<br>(-515.0874166) | -514.919037<br>(-514.931092) | -514.906760<br>(-514.918838) | -514.9581310<br>(-514.970010) |

| Transition State, (Hartree) |                 |                                |                                           |                                          |                              |
|-----------------------------|-----------------|--------------------------------|-------------------------------------------|------------------------------------------|------------------------------|
| Entry                       | R               | Total Electronic Energy        | Sum of Electronic and Zero-Point Energies | Sum of Electronic and Thermal Enthalpies | Gibbs Free Energy            |
| 1                           | CH <sub>3</sub> | -349.9164569<br>(-349.9308785) | -349.732847<br>(-349.747943)              | -349.72329<br>(-349.738371)              | -349.765725<br>(-349.780838) |
| 2                           | NH <sub>2</sub> | -365.9567591<br>(-365.9740143) | -365.78383<br>(-365.801723)               | -365.774639<br>(-365.792477)             | -365.816123<br>(-365.834046) |
| 3                           | OH              | -385.8194026<br>(-385.8360294) | -385.659771<br>(-385.676570)              | -385.650615<br>(-385.667466)             | -385.692136<br>(-385.708851) |
| 4                           | F               | -409.8387496<br>(-409.8500792) | -409.691518<br>(-409.703312)              | -409.682762<br>(-409.694550)             | -409.723667<br>(-409.735458) |
| 5                           | CHO             | -423.9121905<br>(-423.924619)  | -423.746621<br>(-423.759552)              | -423.736812<br>(-423.749740)             | -423.780303<br>(-423.793228) |
| 6                           | CN              | -402.8405985<br>(-402.8518725) | -402.686347<br>(-402.698085)              | -402.676612<br>(-402.688346)             | -402.719892<br>(-402.731626) |
| 7                           | NO <sub>2</sub> | -515.0581848<br>(-515.0696141) | -514.899497<br>(-514.911363)              | -514.889102<br>(-514.900967)             | -514.934539<br>(-514.946396) |

| Cyclooctatriene [Product], (Hartree) |                 |                                |                                           |                                          |                               |
|--------------------------------------|-----------------|--------------------------------|-------------------------------------------|------------------------------------------|-------------------------------|
| Entry                                | R               | Total Electronic Energy        | Sum of Electronic and Zero-Point Energies | Sum of Electronic and Thermal Enthalpies | Gibbs Free Energy             |
| 1                                    | CH <sub>3</sub> | -349.9670239<br>(-349.9807713) | -349.780699<br>(-349.795164)              | -349.77122<br>(-349.785672)              | -349.8135200<br>(-349.827983) |
| 2                                    | NH <sub>2</sub> | -366.0064205<br>(-366.0229569) | -365.830901<br>(-365.848077)              | -365.821705<br>(-365.838836)             | -365.8632930<br>(-365.880488) |
| 3                                    | OH              | -385.8688178<br>(-385.8848906) | -385.70576<br>(-385.722254)               | -385.696845<br>(-385.713317)             | -385.7379890<br>(-385.754491) |
| 4                                    | F               | -409.8857765<br>(-409.896365)  | -409.735162<br>(-409.746283)              | -409.726527<br>(-409.737632)             | -409.7672960<br>(-409.778425) |
| 5                                    | CHO             | -423.9592584<br>(-423.9709801) | -423.790822<br>(-423.803105)              | -423.781053<br>(-423.793328)             | -423.8246160<br>(-423.836892) |
| 6                                    | CN              | -402.8881301<br>(-402.8987009) | -402.730788<br>(-402.741871)              | -402.721162<br>(-402.732234)             | -402.7643620<br>(-402.775448) |
| 7                                    | NO <sub>2</sub> | -515.1063256<br>(-515.1170332) | -514.944418<br>(-514.955617)              | -514.934177<br>(-514.945369)             | -514.9794280<br>(-514.990624) |

**Note:** Computed energies (Hartree) for 8 $\pi$  electrocyclic ring-closure of 1,3,5,7-octatetraene using M06-2X/6-31+G(d) and M06-2X/6-31+G(d,p) (in parentheses).

#### 4. Energies for disubstituted system

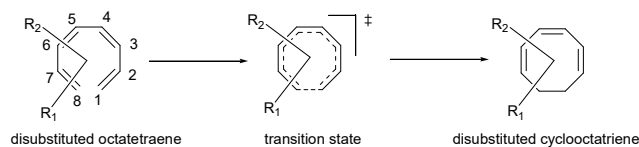

##### 4.1 1,2-substituted

| Octatetraene [Starting Material], (Hartree) |
|---------------------------------------------|
|---------------------------------------------|

| Entry | R <sub>1</sub>  | R <sub>2</sub>  | Total Electronic Energy | Sum of Electronic and Zero-Point Energies | Sum of Electronic and Thermal Enthalpies | Gibbs Free Energy |
|-------|-----------------|-----------------|-------------------------|-------------------------------------------|------------------------------------------|-------------------|
| 1     | CH <sub>3</sub> | CH <sub>3</sub> | -389.2352107            | -389.023883                               | -389.011059                              | -389.063954       |
| 2     |                 | NH <sub>2</sub> | -405.2757525            | -405.075535                               | -405.063859                              | -405.112318       |
| 3     |                 | OH              | -425.1375282            | -424.950011                               | -424.937677                              | -424.98829        |
| 4     |                 | F               | -449.1558291            | -448.980879                               | -448.968743                              | -449.019446       |
| 5     |                 | CHO             | -463.2264627            | -463.033926                               | -463.020802                              | -463.073345       |
| 6     |                 | CN              | -442.1583449            | -441.976463                               | -441.963409                              | -442.016395       |
| 7     |                 | NO <sub>2</sub> | -554.3732404            | -554.187551                               | -554.173764                              | -554.22913        |

| Transition State, (Hartree) |                 |                 |                         |                                           |                                          |                   |
|-----------------------------|-----------------|-----------------|-------------------------|-------------------------------------------|------------------------------------------|-------------------|
| Entry                       | R <sub>1</sub>  | R <sub>2</sub>  | Total Electronic Energy | Sum of Electronic and Zero-Point Energies | Sum of Electronic and Thermal Enthalpies | Gibbs Free Energy |
| 1                           | CH <sub>3</sub> | CH <sub>3</sub> | -389.2614012            | -389.04573                                | -389.035187                              | -389.079734       |
| 2                           |                 | NH <sub>2</sub> | -405.2582544            | -405.057117                               | -405.046252                              | -405.0915         |
| 3                           |                 | OH              | -425.1192573            | -424.93086                                | -424.92017                               | -424.965172       |
| 4                           |                 | F               | -449.1363309            | -448.960448                               | -448.950031                              | -448.994792       |
| 5                           |                 | CHO             | -463.2088771            | -463.014875                               | -463.003494                              | -463.050426       |
| 6                           |                 | CN              | -442.1426925            | -441.959947                               | -441.948606                              | -441.995561       |
| 7                           |                 | NO <sub>2</sub> | -554.3567336            | -554.169253                               | -554.15733                               | -554.206482       |

| Octatetraene [Starting Material], (Hartree) |                 |                 |                         |                                           |                                          |                   |
|---------------------------------------------|-----------------|-----------------|-------------------------|-------------------------------------------|------------------------------------------|-------------------|
| Entry                                       | R <sub>1</sub>  | R <sub>2</sub>  | Total Electronic Energy | Sum of Electronic and Zero-Point Energies | Sum of Electronic and Thermal Enthalpies | Gibbs Free Energy |
| 1                                           | NH <sub>2</sub> | CH <sub>3</sub> | -405.2769095            | -405.07623                                | -405.063891                              | -405.114034       |
| 2                                           |                 | NH <sub>2</sub> | -421.3108688            | -421.121482                               | -421.109284                              | -421.158817       |
| 3                                           |                 | OH              | -441.1711367            | -440.994792                               | -440.982525                              | -441.032473       |
| 4                                           |                 | F               | -465.1907195            | -465.026321                               | -465.014528                              | -465.063665       |
| 5                                           |                 | CHO             | -479.2770895            | -479.095166                               | -479.082265                              | -479.133946       |
| 6                                           |                 | CN              | -458.2053699            | -458.034434                               | -458.02166                               | -458.073252       |
| 7                                           |                 | NO <sub>2</sub> | -570.4218756            | -570.246575                               | -570.233234                              | -570.286335       |

| Transition State, (Hartree) |                 |                 |                         |                                           |                                          |                   |
|-----------------------------|-----------------|-----------------|-------------------------|-------------------------------------------|------------------------------------------|-------------------|
| Entry                       | R <sub>1</sub>  | R <sub>2</sub>  | Total Electronic Energy | Sum of Electronic and Zero-Point Energies | Sum of Electronic and Thermal Enthalpies | Gibbs Free Energy |
| 1                           | NH <sub>2</sub> | CH <sub>3</sub> | -405.259854             | -405.058275                               | -405.047593                              | -405.09237        |
| 2                           |                 | NH <sub>2</sub> | -421.3000099            | -421.10938                                | -421.098885                              | -421.143302       |
| 3                           |                 | OH              | -441.1590748            | -440.981319                               | -440.97098                               | -441.015239       |
| 4                           |                 | F               | -465.1755584            | -465.010413                               | -465.000406                              | -465.044053       |
| 5                           |                 | CHO             | -479.2490054            | -479.065481                               | -479.054421                              | -479.10062        |
| 6                           |                 | CN              | -458.1860429            | -458.013441                               | -458.00264                               | -458.048212       |
| 7                           |                 | NO <sub>2</sub> | -570.4044105            | -570.227143                               | -570.215878                              | -570.262955       |

| Octatetraene [Starting Material], (Hartree) |                |                 |                         |                                           |                                          |                   |
|---------------------------------------------|----------------|-----------------|-------------------------|-------------------------------------------|------------------------------------------|-------------------|
| Entry                                       | R <sub>1</sub> | R <sub>2</sub>  | Total Electronic Energy | Sum of Electronic and Zero-Point Energies | Sum of Electronic and Thermal Enthalpies | Gibbs Free Energy |
| 1                                           | OH             | CH <sub>3</sub> | -425.1367693            | -424.948437                               | -424.936419                              | -424.98608        |
| 2                                           |                | NH <sub>2</sub> | -441.1711007            | -440.994179                               | -440.982213                              | -441.031424       |
| 3                                           |                | OH              | -461.0324575            | -460.868504                               | -460.85672                               | -460.905641       |
| 4                                           |                | F               | -485.0480902            | -484.89631                                | -484.884816                              | -484.933392       |
| 5                                           |                | CHO             | -499.1317062            | -498.96193                                | -498.949505                              | -499.000542       |
| 6                                           |                | CN              | -478.0608659            | -477.902452                               | -477.890095                              | -477.941193       |
| 7                                           |                | NO <sub>2</sub> | -590.2826765            | -590.119468                               | -590.106697                              | -590.158687       |

| Transition State, (Hartree) |                |                 |                         |                                           |                                          |                   |
|-----------------------------|----------------|-----------------|-------------------------|-------------------------------------------|------------------------------------------|-------------------|
| Entry                       | R <sub>1</sub> | R <sub>2</sub>  | Total Electronic Energy | Sum of Electronic and Zero-Point Energies | Sum of Electronic and Thermal Enthalpies | Gibbs Free Energy |
| 1                           | OH             | CH <sub>3</sub> | -425.1177352            | -424.928932                               | -424.91836                               | -424.963133       |
| 2                           |                | NH <sub>2</sub> | -441.1594085            | -440.981014                               | -440.970841                              | -441.014783       |
| 3                           |                | OH              | -461.0199623            | -460.854855                               | -460.844725                              | -460.888597       |
| 4                           |                | F               | -485.0338622            | -484.881105                               | -484.871363                              | -484.914643       |
| 5                           |                | CHO             | -499.105773             | -498.935177                               | -498.924282                              | -498.970299       |
| 6                           |                | CN              | -478.0438354            | -477.883874                               | -477.873282                              | -477.918616       |
| 7                           |                | NO <sub>2</sub> | -590.2655725            | -590.100835                               | -590.0899                                | -590.136425       |

| Octatetraene [Starting Material], (Hartree) |                |                 |                         |                                           |                                          |                   |
|---------------------------------------------|----------------|-----------------|-------------------------|-------------------------------------------|------------------------------------------|-------------------|
| Entry                                       | R <sub>1</sub> | R <sub>2</sub>  | Total Electronic Energy | Sum of Electronic and Zero-Point Energies | Sum of Electronic and Thermal Enthalpies | Gibbs Free Energy |
| 1                                           | F              | CH <sub>3</sub> | -449.1519636            | -448.975982                               | -448.964236                              | -449.013653       |
| 2                                           |                | NH <sub>2</sub> | -465.1867883            | -465.022271                               | -465.010676                              | -465.059295       |
| 3                                           |                | OH              | -485.0466643            | -484.895877                               | -484.884959                              | -484.93229        |
| 4                                           |                | F               | -509.0627785            | -508.923995                               | -508.912661                              | -508.962023       |
| 5                                           |                | CHO             | -523.1394985            | -522.982336                               | -522.970136                              | -523.020751       |
| 6                                           |                | CN              | -502.0704834            | -501.924418                               | -501.912273                              | -501.963083       |
| 7                                           |                | NO <sub>2</sub> | -614.2808155            | -614.130881                               | -614.118042                              | -614.170926       |

| Transition State, (Hartree) |                |                 |                         |                                           |                                          |                   |
|-----------------------------|----------------|-----------------|-------------------------|-------------------------------------------|------------------------------------------|-------------------|
| Entry                       | R <sub>1</sub> | R <sub>2</sub>  | Total Electronic Energy | Sum of Electronic and Zero-Point Energies | Sum of Electronic and Thermal Enthalpies | Gibbs Free Energy |
| 1                           | F              | CH <sub>3</sub> | -449.1324456            | -448.956478                               | -448.946014                              | -448.990951       |
| 2                           |                | NH <sub>2</sub> | -465.169763             | -465.004988                               | -464.994734                              | -465.039014       |
| 3                           |                | OH              | -485.0257258            | -484.873672                               | -484.863582                              | -484.907622       |
| 4                           |                | F               | -509.0410342            | -508.90119                                | -508.891539                              | -508.934893       |
| 5                           |                | CHO             | -523.1207546            | -522.962807                               | -522.952067                              | -522.997993       |
| 6                           |                | CN              | -502.050223             | -501.903338                               | -501.892785                              | -501.938299       |
| 7                           |                | NO <sub>2</sub> | -614.2611345            | -614.109966                               | -614.098723                              | -614.146329       |

| Octatetraene [Starting Material], (Hartree) |                |                 |                         |                                           |                                          |                   |
|---------------------------------------------|----------------|-----------------|-------------------------|-------------------------------------------|------------------------------------------|-------------------|
| Entry                                       | R <sub>1</sub> | R <sub>2</sub>  | Total Electronic Energy | Sum of Electronic and Zero-Point Energies | Sum of Electronic and Thermal Enthalpies | Gibbs Free Energy |
| 1                                           | CHO            | CH <sub>3</sub> | -463.2248737            | -463.031303                               | -463.018392                              | -463.070568       |
| 2                                           |                | NH <sub>2</sub> | -479.2736621            | -479.091729                               | -479.078995                              | -479.130629       |
| 3                                           |                | OH              | -499.1332044            | -498.96355                                | -498.951005                              | -499.002639       |
| 4                                           |                | F               | -523.1451448            | -522.988484                               | -522.976089                              | -523.02776        |
| 5                                           |                | CHO             | -537.2091287            | -537.034867                               | -537.021385                              | -537.075446       |
| 6                                           |                | CN              | -516.1405894            | -515.977316                               | -515.963946                              | -516.018147       |
| 7                                           |                | NO <sub>2</sub> | -628.3534597            | -628.186071                               | -628.17205                               | -628.227975       |

| Transition State, (Hartree) |                |                 |                         |                                           |                                          |                   |
|-----------------------------|----------------|-----------------|-------------------------|-------------------------------------------|------------------------------------------|-------------------|
| Entry                       | R <sub>1</sub> | R <sub>2</sub>  | Total Electronic Energy | Sum of Electronic and Zero-Point Energies | Sum of Electronic and Thermal Enthalpies | Gibbs Free Energy |
| 1                           | CHO            | CH <sub>3</sub> | -463.2076301            | -463.013834                               | -463.002326                              | -463.049744       |
| 2                           |                | NH <sub>2</sub> | -479.2579163            | -479.074812                               | -479.063718                              | -479.109928       |
| 3                           |                | OH              | -499.1038918            | -498.933658                               | -498.922616                              | -498.969095       |
| 4                           |                | F               | -523.1190266            | -522.96155                                | -522.950687                              | -522.997132       |
| 5                           |                | CHO             | -537.1928556            | -537.017402                               | -537.00544                               | -537.054392       |
| 6                           |                | CN              | -516.1223184            | -515.958228                               | -515.946394                              | -515.995075       |
| 7                           |                | NO <sub>2</sub> | -628.3404034            | -628.171921                               | -628.159374                              | -628.210168       |

| Octatetraene [Starting Material], (Hartree) |                |                 |                         |                                           |                                          |                   |
|---------------------------------------------|----------------|-----------------|-------------------------|-------------------------------------------|------------------------------------------|-------------------|
| Entry                                       | R <sub>1</sub> | R <sub>2</sub>  | Total Electronic Energy | Sum of Electronic and Zero-Point Energies | Sum of Electronic and Thermal Enthalpies | Gibbs Free Energy |
| 1                                           | CN             | CH <sub>3</sub> | -442.1622408            | -441.980124                               | -441.968255                              | -442.01789        |
| 2                                           |                | NH <sub>2</sub> | -458.2073091            | -458.035858                               | -458.023489                              | -458.074114       |
| 3                                           |                | OH              | -478.0670359            | -477.908606                               | -477.896231                              | -477.94795        |
| 4                                           |                | F               | -502.0793332            | -501.933768                               | -501.922464                              | -501.971125       |
| 5                                           |                | CHO             | -516.1447388            | -515.981633                               | -515.968411                              | -516.02187        |
| 6                                           |                | CN              | -495.0762673            | -494.924169                               | -494.911899                              | -494.962823       |
| 7                                           |                | NO <sub>2</sub> | -607.2867167            | -607.130465                               | -607.11665                               | -607.172095       |

| Transition State, (Hartree) |                |                 |                         |                                           |                                          |                   |
|-----------------------------|----------------|-----------------|-------------------------|-------------------------------------------|------------------------------------------|-------------------|
| Entry                       | R <sub>1</sub> | R <sub>2</sub>  | Total Electronic Energy | Sum of Electronic and Zero-Point Energies | Sum of Electronic and Thermal Enthalpies | Gibbs Free Energy |
| 1                           | CN             | CH <sub>3</sub> | -442.1424612            | -441.959883                               | -441.948547                              | -441.995585       |
| 2                           |                | NH <sub>2</sub> | -458.1858403            | -458.014308                               | -458.003193                              | -458.049533       |
| 3                           |                | OH              | -478.0409541            | -477.881926                               | -477.871083                              | -477.917074       |
| 4                           |                | F               | -502.0546977            | -501.908037                               | -501.897539                              | -501.943036       |
| 5                           |                | CHO             | -516.1284533            | -515.96403                                | -515.952395                              | -516.000506       |
| 6                           |                | CN              | -495.0562032            | -494.903015                               | -494.891472                              | -494.939442       |
| 7                           |                | NO <sub>2</sub> | -607.2699248            | -607.112348                               | -607.100157                              | -607.15008        |

| Octatetraene [Starting Material], (Hartree) |                 |                 |                         |                                           |                                          |                   |
|---------------------------------------------|-----------------|-----------------|-------------------------|-------------------------------------------|------------------------------------------|-------------------|
| Entry                                       | R <sub>1</sub>  | R <sub>2</sub>  | Total Electronic Energy | Sum of Electronic and Zero-Point Energies | Sum of Electronic and Thermal Enthalpies | Gibbs Free Energy |
| 1                                           | NO <sub>2</sub> | CH <sub>3</sub> | -554.3721443            | -554.185132                               | -554.171812                              | -554.225624       |
| 2                                           |                 | NH <sub>2</sub> | -570.4200721            | -570.244561                               | -570.231396                              | -570.284493       |
| 3                                           |                 | OH              | -590.276836             | -590.113625                               | -590.100588                              | -590.154541       |
| 4                                           |                 | F               | -614.2887373            | -614.138381                               | -614.125551                              | -614.179357       |
| 5                                           |                 | CHO             | -628.3550642            | -628.186998                               | -628.173171                              | -628.22854        |
| 6                                           |                 | CN              | -607.2843236            | -607.127167                               | -607.113398                              | -607.169133       |
| 7                                           |                 | NO <sub>2</sub> | -719.4954428            | -719.334043                               | -719.31969                               | -719.376373       |

| Transition State, (Hartree) |                 |                 |                         |                                           |                                          |                   |
|-----------------------------|-----------------|-----------------|-------------------------|-------------------------------------------|------------------------------------------|-------------------|
| Entry                       | R <sub>1</sub>  | R <sub>2</sub>  | Total Electronic Energy | Sum of Electronic and Zero-Point Energies | Sum of Electronic and Thermal Enthalpies | Gibbs Free Energy |
| 1                           | NO <sub>2</sub> | CH <sub>3</sub> | -554.3571585            | -554.16943                                | -554.157593                              | -554.206175       |
| 2                           |                 | NH <sub>2</sub> | -570.4048106            | -570.228408                               | -570.2167                                | -570.264805       |
| 3                           |                 | OH              | -590.250765             | -590.087288                               | -590.075699                              | -590.124017       |
| 4                           |                 | F               | -614.2640576            | -614.112846                               | -614.10164                               | -614.149267       |
| 5                           |                 | CHO             | -628.3395793            | -628.170566                               | -628.158127                              | -628.208801       |
| 6                           |                 | CN              | -607.2678682            | -607.110194                               | -607.097904                              | -607.148141       |
| 7                           |                 | NO <sub>2</sub> | -719.4770227            | -719.315076                               | -719.302019                              | -719.354545       |

#### 4.2 1,3-substituted

| Octatetraene [Starting Material], (Hartree) |                 |                 |                         |                                           |                                          |                   |
|---------------------------------------------|-----------------|-----------------|-------------------------|-------------------------------------------|------------------------------------------|-------------------|
| Entry                                       | R <sub>1</sub>  | R <sub>2</sub>  | Total Electronic Energy | Sum of Electronic and Zero-Point Energies | Sum of Electronic and Thermal Enthalpies | Gibbs Free Energy |
| 1                                           | CH <sub>3</sub> | CH <sub>3</sub> | -389.2355486            | -389.024493                               | -389.012507                              | -389.062437       |
| 2                                           |                 | NH <sub>2</sub> | -405.2790524            | -405.078721                               | -405.06636                               | -405.116509       |
| 3                                           |                 | OH              | -425.1400999            | -424.952352                               | -424.940023                              | -424.99069        |
| 4                                           |                 | F               | -449.1560331            | -448.981089                               | -448.968993                              | -449.019452       |

|   |  |                 |              |             |             |             |
|---|--|-----------------|--------------|-------------|-------------|-------------|
| 5 |  | CHO             | -463.2276081 | -463.035013 | -463.021918 | -463.074502 |
| 6 |  | CN              | -442.1599451 | -441.978123 | -441.965176 | -442.017368 |
| 7 |  | NO <sub>2</sub> | -554.3757609 | -554.189737 | -554.176273 | -554.229946 |

| Transition State, (Hartree) |                 |                 |                         |                                           |                                          |                   |
|-----------------------------|-----------------|-----------------|-------------------------|-------------------------------------------|------------------------------------------|-------------------|
| Entry                       | R <sub>1</sub>  | R <sub>2</sub>  | Total Electronic Energy | Sum of Electronic and Zero-Point Energies | Sum of Electronic and Thermal Enthalpies | Gibbs Free Energy |
| 1                           | CH <sub>3</sub> | CH <sub>3</sub> | -389.2158996            | -389.004122                               | -388.992925                              | -389.039068       |
| 2                           |                 | NH <sub>2</sub> | -405.2550247            | -405.054306                               | -405.043405                              | -405.088623       |
| 3                           |                 | OH              | -425.1175397            | -424.929533                               | -424.918831                              | -424.963777       |
| 4                           |                 | F               | -449.1363261            | -448.960507                               | -448.950224                              | -448.994536       |
| 5                           |                 | CHO             | -463.2101452            | -463.016495                               | -463.005018                              | -463.052192       |
| 6                           |                 | CN              | -442.1404375            | -441.957577                               | -441.946327                              | -441.992962       |
| 7                           |                 | NO <sub>2</sub> | -554.3583927            | -554.171078                               | -554.159121                              | -554.208477       |

| Octatetraene [Starting Material], (Hartree) |                 |                 |                         |                                           |                                          |                   |
|---------------------------------------------|-----------------|-----------------|-------------------------|-------------------------------------------|------------------------------------------|-------------------|
| Entry                                       | R <sub>1</sub>  | R <sub>2</sub>  | Total Electronic Energy | Sum of Electronic and Zero-Point Energies | Sum of Electronic and Thermal Enthalpies | Gibbs Free Energy |
| 1                                           | NH <sub>2</sub> | CH <sub>3</sub> | -405.2787739            | -405.078013                               | -405.065649                              | -405.116063       |
| 2                                           |                 | NH <sub>2</sub> | -421.3264768            | -421.136023                               | -421.124203                              | -421.17267        |
| 3                                           |                 | OH              | -441.1886666            | -441.011969                               | -440.999932                              | -441.049262       |
| 4                                           |                 | F               | -465.2031788            | -465.039332                               | -465.027451                              | -465.076775       |
| 5                                           |                 | CHO             | -479.2701386            | -479.087975                               | -479.075165                              | -479.126647       |
| 6                                           |                 | CN              | -458.2065576            | -458.035703                               | -458.022925                              | -458.074634       |
| 7                                           |                 | NO <sub>2</sub> | -570.4210912            | -570.245342                               | -570.232205                              | -570.2851         |

| Transition State, (Hartree) |                 |                 |                         |                                           |                                          |                   |
|-----------------------------|-----------------|-----------------|-------------------------|-------------------------------------------|------------------------------------------|-------------------|
| Entry                       | R <sub>1</sub>  | R <sub>2</sub>  | Total Electronic Energy | Sum of Electronic and Zero-Point Energies | Sum of Electronic and Thermal Enthalpies | Gibbs Free Energy |
| 1                           | NH <sub>2</sub> | CH <sub>3</sub> | -405.256043             | -405.054939                               | -405.044039                              | -405.089678       |
| 2                           |                 | NH <sub>2</sub> | -421.2951583            | -421.104973                               | -421.094427                              | -421.138833       |
| 3                           |                 | OH              | -441.1581162            | -440.980644                               | -440.970261                              | -441.014426       |
| 4                           |                 | F               | -465.1764042            | -465.011124                               | -465.001179                              | -465.044653       |
| 5                           |                 | CHO             | -479.2510639            | -479.067883                               | -479.0568                                | -479.102965       |
| 6                           |                 | CN              | -458.1811087            | -458.009023                               | -457.998091                              | -458.043947       |
| 7                           |                 | NO <sub>2</sub> | -570.3992986            | -570.222858                               | -570.211223                              | -570.25958        |

| Octatetraene [Starting Material], (Hartree) |                |                 |                         |                                           |                                          |                   |
|---------------------------------------------|----------------|-----------------|-------------------------|-------------------------------------------|------------------------------------------|-------------------|
| Entry                                       | R <sub>1</sub> | R <sub>2</sub>  | Total Electronic Energy | Sum of Electronic and Zero-Point Energies | Sum of Electronic and Thermal Enthalpies | Gibbs Free Energy |
| 1                                           | OH             | CH <sub>3</sub> | -425.1388873            | -424.950967                               | -424.938733                              | -424.988852       |
| 2                                           |                | NH <sub>2</sub> | -441.180773             | -441.00398                                | -440.991847                              | -441.04137        |
| 3                                           |                | OH              | -461.0376772            | -460.873484                               | -460.861659                              | -460.910788       |
| 4                                           |                | F               | -485.054105             | -484.902646                               | -484.891046                              | -484.939874       |
| 5                                           |                | CHO             | -499.1277781            | -498.958437                               | -498.945722                              | -498.997265       |
| 6                                           |                | CN              | -478.0587525            | -477.900702                               | -477.88809                               | -477.93966        |
| 7                                           |                | NO <sub>2</sub> | -590.2746799            | -590.112171                               | -590.09899                               | -590.151956       |

| Transition State, (Hartree) |                |                 |                         |                                           |                                          |                   |
|-----------------------------|----------------|-----------------|-------------------------|-------------------------------------------|------------------------------------------|-------------------|
| Entry                       | R <sub>1</sub> | R <sub>2</sub>  | Total Electronic Energy | Sum of Electronic and Zero-Point Energies | Sum of Electronic and Thermal Enthalpies | Gibbs Free Energy |
| 1                           | OH             | CH <sub>3</sub> | -425.1148327            | -424.926292                               | -424.915485                              | -424.962286       |
| 2                           |                | NH <sub>2</sub> | -441.1531742            | -440.975796                               | -440.965353                              | -441.009631       |
| 3                           |                | OH              | -461.0152403            | -460.850557                               | -460.840344                              | -460.8843         |

|   |  |                 |              |             |             |             |
|---|--|-----------------|--------------|-------------|-------------|-------------|
| 4 |  | F               | -485.0344943 | -484.882131 | -484.872346 | -484.915683 |
| 5 |  | CHO             | -499.1091153 | -498.938587 | -498.927722 | -498.973658 |
| 6 |  | CN              | -478.0389044 | -477.879549 | -477.868799 | -477.914454 |
| 7 |  | NO <sub>2</sub> | -590.2572694 | -590.093577 | -590.082119 | -590.130541 |

| Octatetraene [Starting Material], (Hartree) |                |                 |                         |                                           |                                          |                   |
|---------------------------------------------|----------------|-----------------|-------------------------|-------------------------------------------|------------------------------------------|-------------------|
| Entry                                       | R <sub>1</sub> | R <sub>2</sub>  | Total Electronic Energy | Sum of Electronic and Zero-Point Energies | Sum of Electronic and Thermal Enthalpies | Gibbs Free Energy |
| 1                                           | F              | CH <sub>3</sub> | -449.1543572            | -448.978896                               | -448.967041                              | -449.016729       |
| 2                                           |                | NH <sub>2</sub> | -465.1941644            | -465.030295                               | -465.019313                              | -465.066467       |
| 3                                           |                | OH              | -485.0527382            | -484.901068                               | -484.889585                              | -484.938421       |
| 4                                           |                | F               | -509.0682614            | -508.929312                               | -508.918067                              | -508.966713       |
| 5                                           |                | CHO             | -523.1404059            | -522.983922                               | -522.972204                              | -523.022239       |
| 6                                           |                | CN              | -502.0719394            | -501.926506                               | -501.91504                               | -501.964223       |
| 7                                           |                | NO <sub>2</sub> | -614.2869525            | -614.136754                               | -614.123975                              | -614.176516       |

| Transition State, (Hartree) |                |                 |                         |                                           |                                          |                   |
|-----------------------------|----------------|-----------------|-------------------------|-------------------------------------------|------------------------------------------|-------------------|
| Entry                       | R <sub>1</sub> | R <sub>2</sub>  | Total Electronic Energy | Sum of Electronic and Zero-Point Energies | Sum of Electronic and Thermal Enthalpies | Gibbs Free Energy |
| 1                           | F              | CH <sub>3</sub> | -449.1295123            | -448.953681                               | -448.943152                              | -448.988536       |
| 2                           |                | NH <sub>2</sub> | -465.1681022            | -465.003332                               | -464.993118                              | -465.03718        |
| 3                           |                | OH              | -485.0297792            | -484.877804                               | -484.867791                              | -484.911597       |
| 4                           |                | F               | -509.0478773            | -508.908218                               | -508.89865                               | -508.941754       |
| 5                           |                | CHO             | -523.1224628            | -522.964803                               | -522.954069                              | -522.999992       |
| 6                           |                | CN              | -502.0513508            | -501.904616                               | -501.894071                              | -501.93955        |
| 7                           |                | NO <sub>2</sub> | -614.269202             | -614.118209                               | -614.106942                              | -614.155222       |

| Octatetraene [Starting Material], (Hartree) |                |                 |                         |                                           |                                          |                   |
|---------------------------------------------|----------------|-----------------|-------------------------|-------------------------------------------|------------------------------------------|-------------------|
| Entry                                       | R <sub>1</sub> | R <sub>2</sub>  | Total Electronic Energy | Sum of Electronic and Zero-Point Energies | Sum of Electronic and Thermal Enthalpies | Gibbs Free Energy |
| 1                                           | CHO            | CH <sub>3</sub> | -463.2244745            | -463.030964                               | -463.018038                              | -463.070294       |
| 2                                           |                | NH <sub>2</sub> | -479.2664958            | -479.084466                               | -479.071697                              | -479.123538       |
| 3                                           |                | OH              | -499.1282681            | -498.959045                               | -498.946374                              | -498.997985       |
| 4                                           |                | F               | -523.1431046            | -522.986612                               | -522.974208                              | -523.025512       |
| 5                                           |                | CHO             | -537.2140209            | -537.039939                               | -537.026499                              | -537.080484       |
| 6                                           |                | CN              | -516.1437954            | -515.980304                               | -515.966971                              | -516.020702       |
| 7                                           |                | NO <sub>2</sub> | -628.3585995            | -628.190773                               | -628.176868                              | -628.232562       |

| Transition State, (Hartree) |                |                 |                         |                                           |                                          |                   |
|-----------------------------|----------------|-----------------|-------------------------|-------------------------------------------|------------------------------------------|-------------------|
| Entry                       | R <sub>1</sub> | R <sub>2</sub>  | Total Electronic Energy | Sum of Electronic and Zero-Point Energies | Sum of Electronic and Thermal Enthalpies | Gibbs Free Energy |
| 1                           | CHO            | CH <sub>3</sub> | -463.205795             | -463.012644                               | -463.000774                              | -463.050593       |
| 2                           |                | NH <sub>2</sub> | -479.245771             | -479.063474                               | -479.052079                              | -479.099121       |
| 3                           |                | OH              | -499.1069606            | -498.937238                               | -498.926123                              | -498.972711       |
| 4                           |                | F               | -523.1243902            | -522.967104                               | -522.956303                              | -523.002497       |
| 5                           |                | CHO             | -537.1982113            | -537.022923                               | -537.010932                              | -537.060024       |
| 6                           |                | CN              | -516.1265664            | -515.962466                               | -515.950694                              | -515.999216       |
| 7                           |                | NO <sub>2</sub> | -628.3440133            | -628.175335                               | -628.162843                              | -628.213868       |

| Octatetraene [Starting Material], (Hartree) |                |                 |                         |                                           |                                          |                   |
|---------------------------------------------|----------------|-----------------|-------------------------|-------------------------------------------|------------------------------------------|-------------------|
| Entry                                       | R <sub>1</sub> | R <sub>2</sub>  | Total Electronic Energy | Sum of Electronic and Zero-Point Energies | Sum of Electronic and Thermal Enthalpies | Gibbs Free Energy |
| 1                                           | CN             | CH <sub>3</sub> | -442.162508             | -441.980789                               | -441.967893                              | -442.0203         |
| 2                                           |                | NH <sub>2</sub> | -458.2014903            | -458.030931                               | -458.018266                              | -458.069841       |
| 3                                           |                | OH              | -478.0611139            | -477.903163                               | -477.890764                              | -477.941765       |

|   |  |                 |              |             |             |             |
|---|--|-----------------|--------------|-------------|-------------|-------------|
| 4 |  | F               | -502.0756087 | -501.930371 | -501.919017 | -501.967565 |
| 5 |  | CHO             | -516.1476672 | -515.984013 | -515.970895 | -516.023772 |
| 6 |  | CN              | -495.0762533 | -494.923931 | -494.910857 | -494.964039 |
| 7 |  | NO <sub>2</sub> | -607.2900362 | -607.133517 | -607.119765 | -607.174863 |

| Transition State, (Hartree) |                |                 |                         |                                           |                                          |                   |
|-----------------------------|----------------|-----------------|-------------------------|-------------------------------------------|------------------------------------------|-------------------|
| Entry                       | R <sub>1</sub> | R <sub>2</sub>  | Total Electronic Energy | Sum of Electronic and Zero-Point Energies | Sum of Electronic and Thermal Enthalpies | Gibbs Free Energy |
| 1                           | CN             | CH <sub>3</sub> | -442.1383739            | -441.95556                                | -441.944184                              | -441.991596       |
| 2                           |                | NH <sub>2</sub> | -458.1771576            | -458.005609                               | -457.994517                              | -458.040787       |
| 3                           |                | OH              | -478.0385785            | -477.879843                               | -477.868976                              | -477.914961       |
| 4                           |                | F               | -502.0558802            | -501.909223                               | -501.898783                              | -501.944069       |
| 5                           |                | CHO             | -516.1302095            | -515.965764                               | -515.954146                              | -516.002267       |
| 6                           |                | CN              | -495.0581848            | -494.90489                                | -494.893414                              | -494.941225       |
| 7                           |                | NO <sub>2</sub> | -607.2756955            | -607.117987                               | -607.105811                              | -607.156021       |

| Octatetraene [Starting Material], (Hartree) |                 |                 |                         |                                           |                                          |                   |
|---------------------------------------------|-----------------|-----------------|-------------------------|-------------------------------------------|------------------------------------------|-------------------|
| Entry                                       | R <sub>1</sub>  | R <sub>2</sub>  | Total Electronic Energy | Sum of Electronic and Zero-Point Energies | Sum of Electronic and Thermal Enthalpies | Gibbs Free Energy |
| 1                                           | NO <sub>2</sub> | CH <sub>3</sub> | -554.3707335            | -554.183913                               | -554.170573                              | -554.224114       |
| 2                                           |                 | NH <sub>2</sub> | -570.4116012            | -570.235587                               | -570.22254                               | -570.275421       |
| 3                                           |                 | OH              | -590.268686             | -590.106584                               | -590.093451                              | -590.146764       |
| 4                                           |                 | F               | -614.2824405            | -614.132385                               | -614.119661                              | -614.17213        |
| 5                                           |                 | CHO             | -628.3603082            | -628.192529                               | -628.17869                               | -628.234104       |
| 6                                           |                 | CN              | -607.2865439            | -607.130016                               | -607.116242                              | -607.171648       |
| 7                                           |                 | NO <sub>2</sub> | -719.5047206            | -719.343354                               | -719.329082                              | -719.385753       |

| Transition State, (Hartree) |                 |                 |                         |                                           |                                          |                   |
|-----------------------------|-----------------|-----------------|-------------------------|-------------------------------------------|------------------------------------------|-------------------|
| Entry                       | R <sub>1</sub>  | R <sub>2</sub>  | Total Electronic Energy | Sum of Electronic and Zero-Point Energies | Sum of Electronic and Thermal Enthalpies | Gibbs Free Energy |
| 1                           | NO <sub>2</sub> | CH <sub>3</sub> | -554.3562864            | -554.169233                               | -554.157127                              | -554.206547       |
| 2                           |                 | NH <sub>2</sub> | -570.3956408            | -570.219691                               | -570.207888                              | -570.256325       |
| 3                           |                 | OH              | -590.2561716            | -590.093133                               | -590.081451                              | -590.12984        |
| 4                           |                 | F               | -614.2727468            | -614.122085                               | -614.110798                              | -614.15864        |
| 5                           |                 | CHO             | -628.3473774            | -628.178852                               | -628.166385                              | -628.217093       |
| 6                           |                 | CN              | -607.274689             | -607.117018                               | -607.104757                              | -607.154945       |
| 7                           |                 | NO <sub>2</sub> | -719.4921903            | -719.330285                               | -719.317271                              | -719.370414       |

#### 4.3 1,4-substituted

| Octatetraene [Starting Material], (Hartree) |                 |                 |                         |                                           |                                          |                   |
|---------------------------------------------|-----------------|-----------------|-------------------------|-------------------------------------------|------------------------------------------|-------------------|
| Entry                                       | R <sub>1</sub>  | R <sub>2</sub>  | Total Electronic Energy | Sum of Electronic and Zero-Point Energies | Sum of Electronic and Thermal Enthalpies | Gibbs Free Energy |
| 1                                           | CH <sub>3</sub> | CH <sub>3</sub> | -389.2358214            | -389.024309                               | -389.011582                              | -389.063398       |
| 2                                           |                 | NH <sub>2</sub> | -405.2781141            | -405.077587                               | -405.065154                              | -405.115664       |
| 3                                           |                 | OH              | -425.1400845            | -424.952894                               | -424.94036                               | -424.992373       |
| 4                                           |                 | F               | -449.1564948            | -448.981942                               | -448.969743                              | -449.020638       |
| 5                                           |                 | CHO             | -463.2273711            | -463.034774                               | -463.021651                              | -463.074317       |
| 6                                           |                 | CN              | -442.1592497            | -441.977595                               | -441.964465                              | -442.017877       |
| 7                                           |                 | NO <sub>2</sub> | -554.3737372            | -554.188178                               | -554.174397                              | -554.229601       |

| Transition State, (Hartree) |                |                |                         |                                           |                                          |                   |
|-----------------------------|----------------|----------------|-------------------------|-------------------------------------------|------------------------------------------|-------------------|
| Entry                       | R <sub>1</sub> | R <sub>2</sub> | Total Electronic Energy | Sum of Electronic and Zero-Point Energies | Sum of Electronic and Thermal Enthalpies | Gibbs Free Energy |

|   |                 |                 |              | Energies    | Enthalpies  |             |
|---|-----------------|-----------------|--------------|-------------|-------------|-------------|
| 1 | CH <sub>3</sub> | CH <sub>3</sub> | -389.2142031 | -389.002266 | -388.991113 | -389.037255 |
| 2 |                 | NH <sub>2</sub> | -405.2540856 | -405.052958 | -405.042183 | -405.087229 |
| 3 |                 | OH              | -425.1168909 | -424.928696 | -424.918055 | -424.962945 |
| 4 |                 | F               | -449.136585  | -448.961027 | -448.950687 | -448.995196 |
| 5 |                 | CHO             | -463.209985  | -463.016353 | -463.004872 | -463.05213  |
| 6 |                 | CN              | -442.1394506 | -441.956809 | -441.945539 | -441.992265 |
| 7 |                 | NO <sub>2</sub> | -554.357098  | -554.170035 | -554.158106 | -554.207016 |

| Octatetraene [Starting Material], (Hartree) |                 |                 |                         |                                           |                                          |                   |
|---------------------------------------------|-----------------|-----------------|-------------------------|-------------------------------------------|------------------------------------------|-------------------|
| Entry                                       | R <sub>1</sub>  | R <sub>2</sub>  | Total Electronic Energy | Sum of Electronic and Zero-Point Energies | Sum of Electronic and Thermal Enthalpies | Gibbs Free Energy |
| 1                                           | NH <sub>2</sub> | CH <sub>3</sub> | -405.2775534            | -405.076755                               | -405.064438                              | -405.114502       |
| 2                                           |                 | NH <sub>2</sub> | -421.3180394            | -421.128452                               | -421.116347                              | -421.165695       |
| 3                                           |                 | OH              | -441.1802687            | -441.003526                               | -440.991516                              | -441.040942       |
| 4                                           |                 | F               | -465.1975871            | -465.03344                                | -465.021628                              | -465.070904       |
| 5                                           |                 | CHO             | -479.2728253            | -479.091057                               | -479.078151                              | -479.129812       |
| 6                                           |                 | CN              | -458.2038911            | -458.033062                               | -458.020206                              | -458.071943       |
| 7                                           |                 | NO <sub>2</sub> | -570.4193326            | -570.244769                               | -570.231151                              | -570.285242       |

| Transition State, (Hartree) |                 |                 |                         |                                           |                                          |                   |
|-----------------------------|-----------------|-----------------|-------------------------|-------------------------------------------|------------------------------------------|-------------------|
| Entry                       | R <sub>1</sub>  | R <sub>2</sub>  | Total Electronic Energy | Sum of Electronic and Zero-Point Energies | Sum of Electronic and Thermal Enthalpies | Gibbs Free Energy |
| 1                           | NH <sub>2</sub> | CH <sub>3</sub> | -405.2539037            | -405.052729                               | -405.041814                              | -405.087807       |
| 2                           |                 | NH <sub>2</sub> | -421.2923668            | -421.101973                               | -421.091505                              | -421.135797       |
| 3                           |                 | OH              | -441.1554028            | -440.977967                               | -440.967591                              | -441.011793       |
| 4                           |                 | F               | -465.1761593            | -465.011153                               | -465.001182                              | -465.044763       |
| 5                           |                 | CHO             | -479.253028             | -479.069782                               | -479.058799                              | -479.104838       |
| 6                           |                 | CN              | -458.181817             | -458.009821                               | -457.998913                              | -458.044776       |
| 7                           |                 | NO <sub>2</sub> | -570.4000214            | -570.223589                               | -570.211994                              | -570.260404       |

| Octatetraene [Starting Material], (Hartree) |                |                 |                         |                                           |                                          |                   |
|---------------------------------------------|----------------|-----------------|-------------------------|-------------------------------------------|------------------------------------------|-------------------|
| Entry                                       | R <sub>1</sub> | R <sub>2</sub>  | Total Electronic Energy | Sum of Electronic and Zero-Point Energies | Sum of Electronic and Thermal Enthalpies | Gibbs Free Energy |
| 1                                           | OH             | CH <sub>3</sub> | -425.1373797            | -424.94913                                | -424.937018                              | -424.987054       |
| 2                                           |                | NH <sub>2</sub> | -441.1785881            | -441.001484                               | -440.989652                              | -441.038679       |
| 3                                           |                | OH              | -461.0400336            | -460.875783                               | -460.864054                              | -460.913222       |
| 4                                           |                | F               | -485.0569295            | -484.905028                               | -484.893601                              | -484.942148       |
| 5                                           |                | CHO             | -499.1303493            | -498.96061                                | -498.948198                              | -498.999157       |
| 6                                           |                | CN              | -478.0608931            | -477.902108                               | -477.88976                               | -477.940696       |
| 7                                           |                | NO <sub>2</sub> | -590.2758552            | -590.113331                               | -590.100258                              | -590.153604       |

| Transition State, (Hartree) |                |                 |                         |                                           |                                          |                   |
|-----------------------------|----------------|-----------------|-------------------------|-------------------------------------------|------------------------------------------|-------------------|
| Entry                       | R <sub>1</sub> | R <sub>2</sub>  | Total Electronic Energy | Sum of Electronic and Zero-Point Energies | Sum of Electronic and Thermal Enthalpies | Gibbs Free Energy |
| 1                           | OH             | CH <sub>3</sub> | -425.1130325            | -424.924645                               | -424.913956                              | -424.959267       |
| 2                           |                | NH <sub>2</sub> | -441.1516475            | -440.974127                               | -440.963815                              | -441.007917       |
| 3                           |                | OH              | -461.0143369            | -460.849708                               | -460.839519                              | -460.883495       |
| 4                           |                | F               | -485.034775             | -484.88246                                | -484.872706                              | -484.916008       |
| 5                           |                | CHO             | -499.1108153            | -498.940205                               | -498.929414                              | -498.975217       |
| 6                           |                | CN              | -478.0391745            | -477.879947                               | -477.869196                              | -477.91494        |
| 7                           |                | NO <sub>2</sub> | -590.2572514            | -590.093345                               | -590.081938                              | -590.130427       |

| Octatetraene [Starting Material], (Hartree) |                |                |                  |                   |                   |                   |
|---------------------------------------------|----------------|----------------|------------------|-------------------|-------------------|-------------------|
| Entry                                       | R <sub>1</sub> | R <sub>2</sub> | Total Electronic | Sum of Electronic | Sum of Electronic | Gibbs Free Energy |



|   |   |                 | Energy       | and Zero-Point<br>Energies | and Thermal<br>Enthalpies |             |
|---|---|-----------------|--------------|----------------------------|---------------------------|-------------|
| 1 | F | CH <sub>3</sub> | -449.1518447 | -448.976128                | -448.976128               | -449.014941 |
| 2 |   | NH <sub>2</sub> | -465.1944834 | -465.030009                | -465.018429               | -465.067215 |
| 3 |   | OH              | -485.0562157 | -484.904965                | -484.894273               | -484.940637 |
| 4 |   | F               | -509.0714042 | -508.932724                | -508.922314               | -508.968318 |
| 5 |   | CHO             | -523.1413152 | -522.984371                | -522.972167               | -523.022867 |
| 6 |   | CN              | -502.0732067 | -501.9273                  | -501.916044               | -501.963913 |
| 7 |   | NO <sub>2</sub> | -614.2870747 | -614.137541                | -614.124609               | -614.17804  |

| Transition State, (Hartree) |                |                 |                            |                                              |                                             |                   |
|-----------------------------|----------------|-----------------|----------------------------|----------------------------------------------|---------------------------------------------|-------------------|
| Entry                       | R <sub>1</sub> | R <sub>2</sub>  | Total Electronic<br>Energy | Sum of Electronic and<br>Zero-Point Energies | Sum of Electronic and<br>Thermal Enthalpies | Gibbs Free Energy |
| 1                           | F              | CH <sub>3</sub> | -449.1278747               | -448.952094                                  | -448.941664                                 | -448.98657        |
| 2                           |                | NH <sub>2</sub> | -465.1674715               | -465.002525                                  | -464.992465                                 | -465.036304       |
| 3                           |                | OH              | -485.0296745               | -484.87763                                   | -484.867709                                 | -484.911401       |
| 4                           |                | F               | -509.048994                | -508.909478                                  | -508.899892                                 | -508.943115       |
| 5                           |                | CHO             | -523.1235887               | -522.965765                                  | -522.955146                                 | -523.000821       |
| 6                           |                | CN              | -502.0513709               | -501.904731                                  | -501.894177                                 | -501.939757       |
| 7                           |                | NO <sub>2</sub> | -614.2690172               | -614.117897                                  | -614.106673                                 | -614.154511       |

| Octatetraene [Starting Material], (Hartree) |                |                 |                            |                                                 |                                                |                   |
|---------------------------------------------|----------------|-----------------|----------------------------|-------------------------------------------------|------------------------------------------------|-------------------|
| Entry                                       | R <sub>1</sub> | R <sub>2</sub>  | Total Electronic<br>Energy | Sum of Electronic<br>and Zero-Point<br>Energies | Sum of Electronic<br>and Thermal<br>Enthalpies | Gibbs Free Energy |
| 1                                           | CHO            | CH <sub>3</sub> | -463.2246636               | -463.031277                                     | -463.018322                                    | -463.070794       |
| 2                                           |                | NH <sub>2</sub> | -479.2707853               | -479.088808                                     | -479.07611                                     | -479.127587       |
| 3                                           |                | OH              | -499.13073                 | -498.961406                                     | -498.948808                                    | -499.000225       |
| 4                                           |                | F               | -523.1445929               | -522.988012                                     | -522.975637                                    | -523.026876       |
| 5                                           |                | CHO             | -537.21206                 | -537.037731                                     | -537.0243                                      | -537.078065       |
| 6                                           |                | CN              | -516.1432076               | -515.979847                                     | -515.966488                                    | -516.020371       |
| 7                                           |                | NO <sub>2</sub> | -628.356768                | -628.189335                                     | -628.175327                                    | -628.231191       |

| Transition State, (Hartree) |                |                 |                            |                                                 |                                                |                   |
|-----------------------------|----------------|-----------------|----------------------------|-------------------------------------------------|------------------------------------------------|-------------------|
| Entry                       | R <sub>1</sub> | R <sub>2</sub>  | Total Electronic<br>Energy | Sum of Electronic<br>and Zero-Point<br>Energies | Sum of Electronic<br>and Thermal<br>Enthalpies | Gibbs Free Energy |
| 1                           | CHO            | CH <sub>3</sub> | -463.2044547               | -463.011106                                     | -462.999431                                    | -463.047599       |
| 2                           |                | NH <sub>2</sub> | -479.2472573               | -479.064544                                     | -479.053324                                    | -479.100005       |
| 3                           |                | OH              | -499.1088224               | -498.938977                                     | -498.92795                                     | -498.974384       |
| 4                           |                | F               | -523.1262745               | -522.96898                                      | -522.958239                                    | -523.004315       |
| 5                           |                | CHO             | -537.1975249               | -537.02233                                      | -537.010459                                    | -537.059206       |
| 6                           |                | CN              | -516.1254283               | -515.961216                                     | -515.949425                                    | -515.998017       |
| 7                           |                | NO <sub>2</sub> | -628.3420885               | -628.173522                                     | -628.161025                                    | -628.211991       |

| Octatetraene [Starting Material], (Hartree) |                |                 |                            |                                                 |                                                |                   |
|---------------------------------------------|----------------|-----------------|----------------------------|-------------------------------------------------|------------------------------------------------|-------------------|
| Entry                                       | R <sub>1</sub> | R <sub>2</sub>  | Total Electronic<br>Energy | Sum of Electronic<br>and Zero-Point<br>Energies | Sum of Electronic<br>and Thermal<br>Enthalpies | Gibbs Free Energy |
| 1                                           | CN             | CH <sub>3</sub> | -442.1613406               | -441.978564                                     | -441.965968                                    | -442.017454       |
| 2                                           |                | NH <sub>2</sub> | -458.2078256               | -458.036454                                     | -458.024092                                    | -458.074681       |
| 3                                           |                | OH              | -478.0680834               | -477.909886                                     | -477.898424                                    | -477.946833       |
| 4                                           |                | F               | -502.0804498               | -501.935096                                     | -501.923792                                    | -501.972326       |
| 5                                           |                | CHO             | -516.1466017               | -515.983533                                     | -515.970348                                    | -516.023623       |
| 6                                           |                | CN              | -495.0785229               | -494.925953                                     | -494.912911                                    | -494.966225       |
| 7                                           |                | NO <sub>2</sub> | -607.2912637               | -607.134687                                     | -607.120983                                    | -607.176282       |

| Transition State, (Hartree) |                |                |                  |                   |                   |                   |
|-----------------------------|----------------|----------------|------------------|-------------------|-------------------|-------------------|
| Entry                       | R <sub>1</sub> | R <sub>2</sub> | Total Electronic | Sum of Electronic | Sum of Electronic | Gibbs Free Energy |

|   |    |                 | Energy       | and Zero-Point<br>Energies | and Thermal<br>Enthalpies |             |
|---|----|-----------------|--------------|----------------------------|---------------------------|-------------|
| 1 | CN | CH <sub>3</sub> | -442.1372253 | -441.954277                | -441.942969               | -441.990128 |
| 2 |    | NH <sub>2</sub> | -458.1795672 | -458.007615                | -457.996671               | -458.04273  |
| 3 |    | OH              | -478.0408065 | -477.881742                | -477.870979               | -477.916827 |
| 4 |    | F               | -502.0582486 | -501.911874                | -501.901405               | -501.946853 |
| 5 |    | CHO             | -516.1296596 | -515.96505                 | -515.953497               | -516.001519 |
| 6 |    | CN              | -495.0571945 | -494.903819                | -494.892384               | -494.940083 |
| 7 |    | NO <sub>2</sub> | -607.2738581 | -607.11627                 | -607.104124               | -607.154241 |

| Octatetraene [Starting Material], (Hartree) |                 |                 |                            |                                                 |                                                |                   |
|---------------------------------------------|-----------------|-----------------|----------------------------|-------------------------------------------------|------------------------------------------------|-------------------|
| Entry                                       | R <sub>1</sub>  | R <sub>2</sub>  | Total Electronic<br>Energy | Sum of Electronic<br>and Zero-Point<br>Energies | Sum of Electronic<br>and Thermal<br>Enthalpies | Gibbs Free Energy |
| 1                                           | NO <sub>2</sub> | CH <sub>3</sub> | -554.3734839               | -554.186293                                     | -554.172948                                    | -554.227518       |
| 2                                           |                 | NH <sub>2</sub> | -570.4230236               | -570.247055                                     | -570.234052                                    | -570.286675       |
| 3                                           |                 | OH              | -590.28227                 | -590.118962                                     | -590.106099                                    | -590.15871        |
| 4                                           |                 | F               | -614.2931256               | -614.142622                                     | -614.129947                                    | -614.182476       |
| 5                                           |                 | CHO             | -628.3574394               | -628.189397                                     | -628.175554                                    | -628.231268       |
| 6                                           |                 | CN              | -607.2895669               | -607.132425                                     | -607.118725                                    | -607.174221       |
| 7                                           |                 | NO <sub>2</sub> | -719.5074434               | -719.346034                                     | -719.331762                                    | -719.389296       |

| Transition State, (Hartree) |                 |                 |                            |                                                 |                                                |                   |
|-----------------------------|-----------------|-----------------|----------------------------|-------------------------------------------------|------------------------------------------------|-------------------|
| Entry                       | R <sub>1</sub>  | R <sub>2</sub>  | Total Electronic<br>Energy | Sum of Electronic<br>and Zero-Point<br>Energies | Sum of Electronic<br>and Thermal<br>Enthalpies | Gibbs Free Energy |
| 1                           | NO <sub>2</sub> | CH <sub>3</sub> | -554.3552926               | -554.168176                                     | -554.156048                                    | -554.156048       |
| 2                           |                 | NH <sub>2</sub> | -570.3986914               | -570.222416                                     | -570.210687                                    | -570.259155       |
| 3                           |                 | OH              | -590.2592615               | -590.09577                                      | -590.084259                                    | -590.132524       |
| 4                           |                 | F               | -614.275832                | -614.125041                                     | -614.113806                                    | -614.16167        |
| 5                           |                 | CHO             | -628.3463948               | -628.177408                                     | -628.165044                                    | -628.215573       |
| 6                           |                 | CN              | -607.2737053               | -607.115995                                     | -607.103766                                    | -607.153896       |
| 7                           |                 | NO <sub>2</sub> | -719.4905777               | -719.328561                                     | -719.31565                                     | -719.367836       |

#### 4.4 1,5-substituted

| Octatetraene [Starting Material], (Hartree) |                 |                 |                            |                                                 |                                                |                   |
|---------------------------------------------|-----------------|-----------------|----------------------------|-------------------------------------------------|------------------------------------------------|-------------------|
| Entry                                       | R <sub>1</sub>  | R <sub>2</sub>  | Total Electronic<br>Energy | Sum of Electronic<br>and Zero-Point<br>Energies | Sum of Electronic<br>and Thermal<br>Enthalpies | Gibbs Free Energy |
| 1                                           | CH <sub>3</sub> | CH <sub>3</sub> | -389.2356769               | -389.023791                                     | -389.011223                                    | -389.062188       |
| 2                                           |                 | NH <sub>2</sub> | -405.2783685               | -405.07814                                      | -405.065633                                    | -405.116511       |
| 3                                           |                 | OH              | -425.1399517               | -424.952615                                     | -424.94107                                     | -424.989334       |
| 4                                           |                 | F               | -449.1560013               | -448.981472                                     | -448.970107                                    | -449.018641       |
| 5                                           |                 | CHO             | -463.2266073               | -463.033952                                     | -463.02076                                     | -463.073857       |
| 6                                           |                 | CN              | -442.1582717               | -441.976721                                     | -441.963644                                    | -442.016909       |
| 7                                           |                 | NO <sub>2</sub> | -554.3726161               | -554.186983                                     | -554.173306                                    | -554.228005       |

| Transition State, (Hartree) |                 |                 |                            |                                                 |                                                |                   |
|-----------------------------|-----------------|-----------------|----------------------------|-------------------------------------------------|------------------------------------------------|-------------------|
| Entry                       | R <sub>1</sub>  | R <sub>2</sub>  | Total Electronic<br>Energy | Sum of Electronic<br>and Zero-Point<br>Energies | Sum of Electronic<br>and Thermal<br>Enthalpies | Gibbs Free Energy |
| 1                           | CH <sub>3</sub> | CH <sub>3</sub> | -389.2144435               | -389.002411                                     | -388.991309                                    | -389.037243       |
| 2                           |                 | NH <sub>2</sub> | -405.2540154               | -405.053208                                     | -405.042344                                    | -405.087531       |
| 3                           |                 | OH              | -425.1175154               | -424.929328                                     | -424.918718                                    | -424.963504       |
| 4                           |                 | F               | -449.137043                | -448.961354                                     | -448.951079                                    | -448.995408       |
| 5                           |                 | CHO             | -463.2094906               | -463.01592                                      | -463.004469                                    | -463.05168        |
| 6                           |                 | CN              | -442.1392344               | -441.95644                                      | -441.945228                                    | -441.991809       |
| 7                           |                 | NO <sub>2</sub> | -554.3569165               | -554.169787                                     | -554.157789                                    | -554.206998       |

| Octatetraene [Starting Material], (Hartree) |                 |                 |                         |                                           |                                          |                   |
|---------------------------------------------|-----------------|-----------------|-------------------------|-------------------------------------------|------------------------------------------|-------------------|
| Entry                                       | R <sub>1</sub>  | R <sub>2</sub>  | Total Electronic Energy | Sum of Electronic and Zero-Point Energies | Sum of Electronic and Thermal Enthalpies | Gibbs Free Energy |
| 1                                           | NH <sub>2</sub> | CH <sub>3</sub> | -405.2774865            | -405.076686                               | -405.065181                              | -405.112915       |
| 2                                           |                 | NH <sub>2</sub> | -421.3203465            | -421.13094                                | -421.118794                              | -421.168314       |
| 3                                           |                 | OH              | -441.1819769            | -441.00541                                | -440.993277                              | -441.043318       |
| 4                                           |                 | F               | -465.1984053            | -465.034388                               | -465.022534                              | -465.07208        |
| 5                                           |                 | CHO             | -479.2686642            | -479.0873                                 | -479.074337                              | -479.126412       |
| 6                                           |                 | CN              | -458.2013161            | -458.030526                               | -458.017715                              | -458.069667       |
| 7                                           |                 | NO <sub>2</sub> | -570.4148085            | -570.240377                               | -570.226764                              | -570.281119       |

| Transition State, (Hartree) |                 |                 |                         |                                           |                                          |                   |
|-----------------------------|-----------------|-----------------|-------------------------|-------------------------------------------|------------------------------------------|-------------------|
| Entry                       | R <sub>1</sub>  | R <sub>2</sub>  | Total Electronic Energy | Sum of Electronic and Zero-Point Energies | Sum of Electronic and Thermal Enthalpies | Gibbs Free Energy |
| 1                           | NH <sub>2</sub> | CH <sub>3</sub> | -405.2549104            | -405.053454                               | -405.042682                              | -405.087867       |
| 2                           |                 | NH <sub>2</sub> | -421.2956576            | -421.105414                               | -421.094921                              | -421.139226       |
| 3                           |                 | OH              | -441.159                | -440.98143                                | -440.971176                              | -441.015108       |
| 4                           |                 | F               | -465.1782394            | -465.01328                                | -465.003345                              | -465.046845       |
| 5                           |                 | CHO             | -479.2508929            | -479.067889                               | -479.056805                              | -479.103133       |
| 6                           |                 | CN              | -458.1807117            | -458.008677                               | -457.99776                               | -458.043632       |
| 7                           |                 | NO <sub>2</sub> | -570.3982473            | -570.221804                               | -570.210218                              | -570.258374       |

| Octatetraene [Starting Material], (Hartree) |                |                 |                         |                                           |                                          |                   |
|---------------------------------------------|----------------|-----------------|-------------------------|-------------------------------------------|------------------------------------------|-------------------|
| Entry                                       | R <sub>1</sub> | R <sub>2</sub>  | Total Electronic Energy | Sum of Electronic and Zero-Point Energies | Sum of Electronic and Thermal Enthalpies | Gibbs Free Energy |
| 1                                           | OH             | CH <sub>3</sub> | -425.1374746            | -424.949188                               | -424.937136                              | -424.987002       |
| 2                                           |                | NH <sub>2</sub> | -441.1800921            | -441.003167                               | -440.991296                              | -441.040559       |
| 3                                           |                | OH              | -461.0416604            | -460.877501                               | -460.865705                              | -460.915073       |
| 4                                           |                | F               | -485.0574634            | -484.905909                               | -484.894383                              | -484.943449       |
| 5                                           |                | CHO             | -499.1277939            | -498.958546                               | -498.945982                              | -498.997395       |
| 6                                           |                | CN              | -478.0598382            | -477.901244                               | -477.888822                              | -477.939921       |
| 7                                           |                | NO <sub>2</sub> | -590.2737133            | -590.111232                               | -590.09809                               | -590.1515         |

| Transition State, (Hartree) |                |                 |                         |                                           |                                          |                   |
|-----------------------------|----------------|-----------------|-------------------------|-------------------------------------------|------------------------------------------|-------------------|
| Entry                       | R <sub>1</sub> | R <sub>2</sub>  | Total Electronic Energy | Sum of Electronic and Zero-Point Energies | Sum of Electronic and Thermal Enthalpies | Gibbs Free Energy |
| 1                           | OH             | CH <sub>3</sub> | -425.1139619            | -424.92528                                | -424.914676                              | -424.959661       |
| 2                           |                | NH <sub>2</sub> | -441.1544211            | -440.976953                               | -440.966628                              | -441.010731       |
| 3                           |                | OH              | -461.0174732            | -460.852609                               | -460.84254                               | -460.886242       |
| 4                           |                | F               | -485.0365214            | -484.884196                               | -484.874452                              | -484.917718       |
| 5                           |                | CHO             | -499.1087301            | -498.93847                                | -498.927554                              | -498.973681       |
| 6                           |                | CN              | -478.0384432            | -477.878944                               | -477.868267                              | -477.913801       |
| 7                           |                | NO <sub>2</sub> | -590.2561217            | -590.092193                               | -590.080807                              | -590.128803       |

| Octatetraene [Starting Material], (Hartree) |                |                 |                         |                                           |                                          |                   |
|---------------------------------------------|----------------|-----------------|-------------------------|-------------------------------------------|------------------------------------------|-------------------|
| Entry                                       | R <sub>1</sub> | R <sub>2</sub>  | Total Electronic Energy | Sum of Electronic and Zero-Point Energies | Sum of Electronic and Thermal Enthalpies | Gibbs Free Energy |
| 1                                           | F              | CH <sub>3</sub> | -449.1517985            | -448.97575                                | -448.964024                              | -449.013392       |
| 2                                           |                | NH <sub>2</sub> | -465.1946367            | -465.030137                               | -465.018575                              | -465.067437       |
| 3                                           |                | OH              | -485.0566978            | -484.905239                               | -484.894585                              | -484.940854       |
| 4                                           |                | F               | -509.0722825            | -508.9336                                 | -508.923146                              | -508.969464       |
| 5                                           |                | CHO             | -523.1418472            | -522.98483                                | -522.972634                              | -523.023292       |
| 6                                           |                | CN              | -502.0744813            | -501.928273                               | -501.916132                              | -501.966999       |

|   |  |                 |              |             |             |             |
|---|--|-----------------|--------------|-------------|-------------|-------------|
| 7 |  | NO <sub>2</sub> | -614.2877947 | -614.138001 | -614.125136 | -614.178558 |
|---|--|-----------------|--------------|-------------|-------------|-------------|

| Transition State, (Hartree) |                |                 |                         |                                           |                                          |                   |
|-----------------------------|----------------|-----------------|-------------------------|-------------------------------------------|------------------------------------------|-------------------|
| Entry                       | R <sub>1</sub> | R <sub>2</sub>  | Total Electronic Energy | Sum of Electronic and Zero-Point Energies | Sum of Electronic and Thermal Enthalpies | Gibbs Free Energy |
| 1                           | F              | CH <sub>3</sub> | -449.1283524            | -448.952243                               | -448.941889                              | -448.986573       |
| 2                           |                | NH <sub>2</sub> | -465.16842              | -465.003632                               | -464.993493                              | -465.037469       |
| 3                           |                | OH              | -485.0312061            | -484.878997                               | -484.869134                              | -484.912674       |
| 4                           |                | F               | -509.0499655            | -508.910282                               | -508.90075                               | -508.94384        |
| 5                           |                | CHO             | -523.1219666            | -522.964222                               | -522.95356                               | -522.999359       |
| 6                           |                | CN              | -502.0512304            | -501.904477                               | -501.893966                              | -501.93943        |
| 7                           |                | NO <sub>2</sub> | -614.2687373            | -614.117522                               | -614.106297                              | -614.15416        |

| Octatetraene [Starting Material], (Hartree) |                |                 |                         |                                           |                                          |                   |
|---------------------------------------------|----------------|-----------------|-------------------------|-------------------------------------------|------------------------------------------|-------------------|
| Entry                                       | R <sub>1</sub> | R <sub>2</sub>  | Total Electronic Energy | Sum of Electronic and Zero-Point Energies | Sum of Electronic and Thermal Enthalpies | Gibbs Free Energy |
| 1                                           | CHO            | CH <sub>3</sub> | -463.2239354            | -463.03022                                | -463.017343                              | -463.069376       |
| 2                                           |                | NH <sub>2</sub> | -479.2662908            | -479.084189                               | -479.071454                              | -479.123229       |
| 3                                           |                | OH              | -499.128142             | -498.958841                               | -498.946178                              | -498.997942       |
| 4                                           |                | F               | -523.1430766            | -522.986681                               | -522.974156                              | -523.026503       |
| 5                                           |                | CHO             | -537.2132898            | -537.038595                               | -537.02526                               | -537.078659       |
| 6                                           |                | CN              | -516.1444416            | -515.980736                               | -515.967449                              | -516.020948       |
| 7                                           |                | NO <sub>2</sub> | -628.3582667            | -628.190612                               | -628.176644                              | -628.232402       |

| Transition State, (Hartree) |                |                 |                         |                                           |                                          |                   |
|-----------------------------|----------------|-----------------|-------------------------|-------------------------------------------|------------------------------------------|-------------------|
| Entry                       | R <sub>1</sub> | R <sub>2</sub>  | Total Electronic Energy | Sum of Electronic and Zero-Point Energies | Sum of Electronic and Thermal Enthalpies | Gibbs Free Energy |
| 1                           | CHO            | CH <sub>3</sub> | -463.2037487            | -463.009988                               | -462.998384                              | -463.046205       |
| 2                           |                | NH <sub>2</sub> | -479.2433002            | -479.060963                               | -479.049578                              | -479.096661       |
| 3                           |                | OH              | -499.1061027            | -498.936373                               | -498.925256                              | -498.971917       |
| 4                           |                | F               | -523.1251243            | -522.967925                               | -522.957143                              | -523.003344       |
| 5                           |                | CHO             | -537.1972652            | -537.022142                               | -537.010179                              | -537.059258       |
| 6                           |                | CN              | -516.1257407            | -515.96157                                | -515.949802                              | -515.998361       |
| 7                           |                | NO <sub>2</sub> | -628.343177             | -628.174544                               | -628.162095                              | -628.21288        |

| Octatetraene [Starting Material], (Hartree) |                |                 |                         |                                           |                                          |                   |
|---------------------------------------------|----------------|-----------------|-------------------------|-------------------------------------------|------------------------------------------|-------------------|
| Entry                                       | R <sub>1</sub> | R <sub>2</sub>  | Total Electronic Energy | Sum of Electronic and Zero-Point Energies | Sum of Electronic and Thermal Enthalpies | Gibbs Free Energy |
| 1                                           | CN             | CH <sub>3</sub> | -442.1606815            | -441.97815                                | -441.965529                              | -442.017273       |
| 2                                           |                | NH <sub>2</sub> | -458.203054             | -458.031649                               | -458.01926                               | -458.069997       |
| 3                                           |                | OH              | -478.065344             | -477.907033                               | -477.89557                               | -477.943774       |
| 4                                           |                | F               | -502.0802008            | -501.934567                               | -501.9224                                | -501.974825       |
| 5                                           |                | CHO             | -516.1494667            | -515.985951                               | -515.972833                              | -516.025787       |
| 6                                           |                | CN              | -495.0817051            | -494.928824                               | -494.915866                              | -494.968858       |
| 7                                           |                | NO <sub>2</sub> | -607.2945602            | -607.137812                               | -607.124163                              | -607.178928       |

| Transition State, (Hartree) |                |                 |                         |                                           |                                          |                   |
|-----------------------------|----------------|-----------------|-------------------------|-------------------------------------------|------------------------------------------|-------------------|
| Entry                       | R <sub>1</sub> | R <sub>2</sub>  | Total Electronic Energy | Sum of Electronic and Zero-Point Energies | Sum of Electronic and Thermal Enthalpies | Gibbs Free Energy |
| 1                           | CN             | CH <sub>3</sub> | -442.1367005            | -441.95417                                | -441.942821                              | -441.990109       |
| 2                           |                | NH <sub>2</sub> | -458.1773945            | -458.005786                               | -457.994794                              | -458.040988       |
| 3                           |                | OH              | -478.0388896            | -477.880266                               | -477.8694                                | -477.915451       |
| 4                           |                | F               | -502.0574413            | -501.911192                               | -501.900713                              | -501.946177       |
| 5                           |                | CHO             | -516.1293461            | -515.96501                                | -515.953383                              | -516.001631       |
| 6                           |                | CN              | -495.0575551            | -494.90431                                | -494.89286                               | -494.940648       |

|   |  |                 |              |             |             |             |
|---|--|-----------------|--------------|-------------|-------------|-------------|
| 7 |  | NO <sub>2</sub> | -607.2748942 | -607.117179 | -607.105037 | -607.155143 |
|---|--|-----------------|--------------|-------------|-------------|-------------|

| Octatetraene [Starting Material], (Hartree) |                 |                 |                         |                                           |                                          |                   |
|---------------------------------------------|-----------------|-----------------|-------------------------|-------------------------------------------|------------------------------------------|-------------------|
| Entry                                       | R <sub>1</sub>  | R <sub>2</sub>  | Total Electronic Energy | Sum of Electronic and Zero-Point Energies | Sum of Electronic and Thermal Enthalpies | Gibbs Free Energy |
| 1                                           | NO <sub>2</sub> | CH <sub>3</sub> | -554.3722094            | -554.184664                               | -554.17141                               | -554.22526        |
| 2                                           |                 | NH <sub>2</sub> | -570.4150755            | -570.239125                               | -570.22603                               | -570.279323       |
| 3                                           |                 | OH              | -590.2769897            | -590.113912                               | -590.10088                               | -590.154482       |
| 4                                           |                 | F               | -614.2915698            | -614.14141                                | -614.128538                              | -614.18248        |
| 5                                           |                 | CHO             | -628.3613438            | -628.193162                               | -628.179376                              | -628.234678       |
| 6                                           |                 | CN              | -607.2928242            | -607.13525                                | -607.121618                              | -607.176665       |
| 7                                           |                 | NO <sub>2</sub> | -719.5059662            | -719.344309                               | -719.32999                               | -719.387418       |

| Transition State, (Hartree) |                 |                 |                         |                                           |                                          |                   |
|-----------------------------|-----------------|-----------------|-------------------------|-------------------------------------------|------------------------------------------|-------------------|
| Entry                       | R <sub>1</sub>  | R <sub>2</sub>  | Total Electronic Energy | Sum of Electronic and Zero-Point Energies | Sum of Electronic and Thermal Enthalpies | Gibbs Free Energy |
| 1                           | NO <sub>2</sub> | CH <sub>3</sub> | -554.3544424            | -554.167477                               | -554.155381                              | -554.204891       |
| 2                           |                 | NH <sub>2</sub> | -570.3951566            | -570.219031                               | -570.20729                               | -570.255786       |
| 3                           |                 | OH              | -590.2561161            | -590.09286                                | -590.081293                              | -590.12956        |
| 4                           |                 | F               | -614.2744839            | -614.12379                                | -614.112539                              | -614.16035        |
| 5                           |                 | CHO             | -628.3462137            | -628.177537                               | -628.165109                              | -628.215853       |
| 6                           |                 | CN              | -607.2742437            | -607.11646                                | -607.104234                              | -607.154427       |
| 7                           |                 | NO <sub>2</sub> | -719.4914979            | -719.329248                               | -719.316372                              | -719.368647       |

4.5 1,6-substituted

| Octatetraene [Starting Material], (Hartree) |                 |                 |                         |                                           |                                          |                   |
|---------------------------------------------|-----------------|-----------------|-------------------------|-------------------------------------------|------------------------------------------|-------------------|
| Entry                                       | R <sub>1</sub>  | R <sub>2</sub>  | Total Electronic Energy | Sum of Electronic and Zero-Point Energies | Sum of Electronic and Thermal Enthalpies | Gibbs Free Energy |
| 1                                           | CH <sub>3</sub> | CH <sub>3</sub> | -389.2408404            | -389.02963                                | -389.016851                              | -389.068515       |
| 2                                           |                 | NH <sub>2</sub> | -405.2803586            | -405.080223                               | -405.067641                              | -405.11887        |
| 3                                           |                 | OH              | -425.1423727            | -424.95509                                | -424.942661                              | -424.993623       |
| 4                                           |                 | F               | -449.1580061            | -448.983303                               | -448.971118                              | -449.0221         |
| 5                                           |                 | CHO             | -463.227414             | -463.03467                                | -463.021396                              | -463.074853       |
| 6                                           |                 | CN              | -442.1625183            | -441.980886                               | -441.968631                              | -442.0193         |
| 7                                           |                 | NO <sub>2</sub> | -554.3743169            | -554.188071                               | -554.17423                               | -554.230667       |

| Transition State, (Hartree) |                 |                 |                         |                                           |                                          |                   |
|-----------------------------|-----------------|-----------------|-------------------------|-------------------------------------------|------------------------------------------|-------------------|
| Entry                       | R <sub>1</sub>  | R <sub>2</sub>  | Total Electronic Energy | Sum of Electronic and Zero-Point Energies | Sum of Electronic and Thermal Enthalpies | Gibbs Free Energy |
| 1                           | CH <sub>3</sub> | CH <sub>3</sub> | -389.2160227            | -389.003965                               | -388.992799                              | -389.039086       |
| 2                           |                 | NH <sub>2</sub> | -405.2548367            | -405.053925                               | -405.043049                              | -405.088301       |
| 3                           |                 | OH              | -425.1181186            | -424.929823                               | -424.919233                              | -424.963974       |
| 4                           |                 | F               | -449.1362236            | -448.960272                               | -448.950047                              | -448.994249       |
| 5                           |                 | CHO             | -463.2105168            | -463.016898                               | -463.005445                              | -463.05261        |
| 6                           |                 | CN              | -442.1407762            | -441.958077                               | -441.946826                              | -441.993536       |
| 7                           |                 | NO <sub>2</sub> | -554.3590175            | -554.171888                               | -554.15991                               | -554.209404       |

| Octatetraene [Starting Material], (Hartree) |                 |                 |                         |                                           |                                          |                   |
|---------------------------------------------|-----------------|-----------------|-------------------------|-------------------------------------------|------------------------------------------|-------------------|
| Entry                                       | R <sub>1</sub>  | R <sub>2</sub>  | Total Electronic Energy | Sum of Electronic and Zero-Point Energies | Sum of Electronic and Thermal Enthalpies | Gibbs Free Energy |
| 1                                           | NH <sub>2</sub> | CH <sub>3</sub> | -405.2823173            | -405.081937                               | -405.069453                              | -405.120101       |
| 2                                           |                 | NH <sub>2</sub> | -421.3212962            | -421.131703                               | -421.119527                              | -421.169257       |

|   |  |                 |              |             |             |             |
|---|--|-----------------|--------------|-------------|-------------|-------------|
| 3 |  | OH              | -441.1835075 | -441.006786 | -440.994764 | -441.044319 |
| 4 |  | F               | -465.1996087 | -465.035375 | -465.023618 | -465.072911 |
| 5 |  | CHO             | -479.2705002 | -479.088709 | -479.075667 | -479.128406 |
| 6 |  | CN              | -458.2058274 | -458.03472  | -458.021983 | -458.073471 |
| 7 |  | NO <sub>2</sub> | -570.4183945 | -570.243251 | -570.22954  | -570.285265 |

| Transition State, (Hartree) |                 |                 |                         |                                           |                                          |                   |
|-----------------------------|-----------------|-----------------|-------------------------|-------------------------------------------|------------------------------------------|-------------------|
| Entry                       | R <sub>1</sub>  | R <sub>2</sub>  | Total Electronic Energy | Sum of Electronic and Zero-Point Energies | Sum of Electronic and Thermal Enthalpies | Gibbs Free Energy |
| 1                           | NH <sub>2</sub> | CH <sub>3</sub> | -405.255848             | -405.054744                               | -405.043769                              | -405.089994       |
| 2                           |                 | NH <sub>2</sub> | -421.2934879            | -421.10348                                | -421.092856                              | -421.137534       |
| 3                           |                 | OH              | -441.1569906            | -440.979714                               | -440.969364                              | -441.013557       |
| 4                           |                 | F               | -465.1759424            | -465.011096                               | -465.001094                              | -465.044771       |
| 5                           |                 | CHO             | -479.2534883            | -479.070324                               | -479.059263                              | -479.105473       |
| 6                           |                 | CN              | -458.183413             | -458.011324                               | -458.000423                              | -458.04629        |
| 7                           |                 | NO <sub>2</sub> | -570.4024349            | -570.22591                                | -570.214325                              | -570.262558       |

| Octatetraene [Starting Material], (Hartree) |                |                 |                         |                                           |                                          |                   |
|---------------------------------------------|----------------|-----------------|-------------------------|-------------------------------------------|------------------------------------------|-------------------|
| Entry                                       | R <sub>1</sub> | R <sub>2</sub>  | Total Electronic Energy | Sum of Electronic and Zero-Point Energies | Sum of Electronic and Thermal Enthalpies | Gibbs Free Energy |
| 1                                           | OH             | CH <sub>3</sub> | -425.1421367            | -424.954232                               | -424.942035                              | -424.992325       |
| 2                                           |                | NH <sub>2</sub> | -441.1817224            | -441.004789                               | -440.9928                                | -441.042684       |
| 3                                           |                | OH              | -461.0435969            | -460.879433                               | -460.867651                              | -460.917061       |
| 4                                           |                | F               | -485.0590662            | -484.907343                               | -484.895861                              | -484.944795       |
| 5                                           |                | CHO             | -499.1280236            | -498.958914                               | -498.946846                              | -498.997708       |
| 6                                           |                | CN              | -478.0636477            | -477.905039                               | -477.892606                              | -477.944029       |
| 7                                           |                | NO <sub>2</sub> | -590.2755895            | -590.112459                               | -590.099246                              | -590.153915       |

| Transition State, (Hartree) |                |                 |                         |                                           |                                          |                   |
|-----------------------------|----------------|-----------------|-------------------------|-------------------------------------------|------------------------------------------|-------------------|
| Entry                       | R <sub>1</sub> | R <sub>2</sub>  | Total Electronic Energy | Sum of Electronic and Zero-Point Energies | Sum of Electronic and Thermal Enthalpies | Gibbs Free Energy |
| 1                           | OH             | CH <sub>3</sub> | -425.1150052            | -424.926653                               | -424.915854                              | -424.961957       |
| 2                           |                | NH <sub>2</sub> | -441.1533913            | -440.975893                               | -440.965515                              | -441.009816       |
| 3                           |                | OH              | -461.0162939            | -460.85154                                | -460.841419                              | -460.88527        |
| 4                           |                | F               | -485.0347254            | -484.882431                               | -484.872666                              | -484.916005       |
| 5                           |                | CHO             | -499.1106195            | -498.940124                               | -498.929277                              | -498.975186       |
| 6                           |                | CN              | -478.0403328            | -477.880873                               | -477.870179                              | -477.915754       |
| 7                           |                | NO <sub>2</sub> | -590.2587434            | -590.094933                               | -590.083527                              | -590.131687       |

| Octatetraene [Starting Material], (Hartree) |                |                 |                         |                                           |                                          |                   |
|---------------------------------------------|----------------|-----------------|-------------------------|-------------------------------------------|------------------------------------------|-------------------|
| Entry                                       | R <sub>1</sub> | R <sub>2</sub>  | Total Electronic Energy | Sum of Electronic and Zero-Point Energies | Sum of Electronic and Thermal Enthalpies | Gibbs Free Energy |
| 1                                           | F              | CH <sub>3</sub> | -449.1566224            | -448.981351                               | -448.969393                              | -449.020208       |
| 2                                           |                | NH <sub>2</sub> | -465.1964431            | -465.031998                               | -465.020359                              | -465.069458       |
| 3                                           |                | OH              | -485.0580917            | -484.906961                               | -484.896156                              | -484.94309        |
| 4                                           |                | F               | -509.0735884            | -508.934751                               | -508.924312                              | -508.970788       |
| 5                                           |                | CHO             | -523.1419879            | -522.985164                               | -522.97348                               | -523.023312       |
| 6                                           |                | CN              | -502.0774502            | -501.931232                               | -501.919143                              | -501.969775       |
| 7                                           |                | NO <sub>2</sub> | -614.2890642            | -614.138791                               | -614.12755                               | -614.17694        |

| Transition State, (Hartree) |                |                 |                         |                                           |                                          |                   |
|-----------------------------|----------------|-----------------|-------------------------|-------------------------------------------|------------------------------------------|-------------------|
| Entry                       | R <sub>1</sub> | R <sub>2</sub>  | Total Electronic Energy | Sum of Electronic and Zero-Point Energies | Sum of Electronic and Thermal Enthalpies | Gibbs Free Energy |
| 1                           | F              | CH <sub>3</sub> | -449.129715             | -448.953991                               | -448.943441                              | -448.989146       |
| 2                           |                | NH <sub>2</sub> | -465.1687823            | -465.003989                               | -464.993804                              | -465.03793        |

|   |  |                 |              |             |             |             |
|---|--|-----------------|--------------|-------------|-------------|-------------|
| 3 |  | OH              | -485.0315055 | -484.879217 | -484.869355 | -484.912909 |
| 4 |  | F               | -509.0490981 | -508.909415 | -508.899861 | -508.943001 |
| 5 |  | CHO             | -523.1229935 | -522.965417 | -522.954698 | -523.00061  |
| 6 |  | CN              | -502.0526748 | -501.905957 | -501.89543  | -501.940924 |
| 7 |  | NO <sub>2</sub> | -614.2706447 | -614.119512 | -614.108285 | -614.156326 |

| Octatetraene [Starting Material], (Hartree) |                |                 |                         |                                           |                                          |                   |
|---------------------------------------------|----------------|-----------------|-------------------------|-------------------------------------------|------------------------------------------|-------------------|
| Entry                                       | R <sub>1</sub> | R <sub>2</sub>  | Total Electronic Energy | Sum of Electronic and Zero-Point Energies | Sum of Electronic and Thermal Enthalpies | Gibbs Free Energy |
| 1                                           | CHO            | CH <sub>3</sub> | -463.2294132            | -463.036299                               | -463.023297                              | -463.075587       |
| 2                                           |                | NH <sub>2</sub> | -479.2709089            | -479.088902                               | -479.076118                              | -479.127842       |
| 3                                           |                | OH              | -499.1318061            | -498.962604                               | -498.949973                              | -499.001521       |
| 4                                           |                | F               | -523.1459447            | -522.98929                                | -522.976918                              | -523.028265       |
| 5                                           |                | CHO             | -537.2132524            | -537.038768                               | -537.025201                              | -537.079601       |
| 6                                           |                | CN              | -516.1476468            | -515.984145                               | -515.970776                              | -516.024896       |
| 7                                           |                | NO <sub>2</sub> | -628.3583456            | -628.190621                               | -628.178161                              | -628.230509       |

| Transition State, (Hartree) |                |                 |                         |                                           |                                          |                   |
|-----------------------------|----------------|-----------------|-------------------------|-------------------------------------------|------------------------------------------|-------------------|
| Entry                       | R <sub>1</sub> | R <sub>2</sub>  | Total Electronic Energy | Sum of Electronic and Zero-Point Energies | Sum of Electronic and Thermal Enthalpies | Gibbs Free Energy |
| 1                           | CHO            | CH <sub>3</sub> | -463.2060703            | -463.012451                               | -463.000805                              | -463.048802       |
| 2                           |                | NH <sub>2</sub> | -479.2480144            | -479.065404                               | -479.054095                              | -479.101031       |
| 3                           |                | OH              | -499.1091205            | -498.93897                                | -498.927983                              | -498.974387       |
| 4                           |                | F               | -523.1256347            | -522.968358                               | -522.957557                              | -523.003832       |
| 5                           |                | CHO             | -537.1975084            | -537.02226                                | -537.010333                              | -537.059229       |
| 6                           |                | CN              | -516.1269176            | -515.96291                                | -515.951121                              | -515.999743       |
| 7                           |                | NO <sub>2</sub> | -628.3443632            | -628.17593                                | -628.163415                              | -628.214723       |

| Octatetraene [Starting Material], (Hartree) |                |                 |                         |                                           |                                          |                   |
|---------------------------------------------|----------------|-----------------|-------------------------|-------------------------------------------|------------------------------------------|-------------------|
| Entry                                       | R <sub>1</sub> | R <sub>2</sub>  | Total Electronic Energy | Sum of Electronic and Zero-Point Energies | Sum of Electronic and Thermal Enthalpies | Gibbs Free Energy |
| 1                                           | CN             | CH <sub>3</sub> | -442.1657477            | -441.983582                               | -441.970817                              | -442.023336       |
| 2                                           |                | NH <sub>2</sub> | -458.2072877            | -458.036192                               | -458.023734                              | -458.074628       |
| 3                                           |                | OH              | -478.0681165            | -477.909903                               | -477.898377                              | -477.94689        |
| 4                                           |                | F               | -502.0823592            | -501.936558                               | -501.925348                              | -501.973411       |
| 5                                           |                | CHO             | -516.1496482            | -515.986233                               | -515.972965                              | -516.026707       |
| 6                                           |                | CN              | -495.0839072            | -494.93177                                | -494.918575                              | -494.972864       |
| 7                                           |                | NO <sub>2</sub> | -607.2950574            | -607.138197                               | -607.124377                              | -607.1805         |

| Transition State, (Hartree) |                |                 |                         |                                           |                                          |                   |
|-----------------------------|----------------|-----------------|-------------------------|-------------------------------------------|------------------------------------------|-------------------|
| Entry                       | R <sub>1</sub> | R <sub>2</sub>  | Total Electronic Energy | Sum of Electronic and Zero-Point Energies | Sum of Electronic and Thermal Enthalpies | Gibbs Free Energy |
| 1                           | CN             | CH <sub>3</sub> | -442.1390825            | -441.956179                               | -441.944843                              | -441.99222        |
| 2                           |                | NH <sub>2</sub> | -458.1806619            | -458.008877                               | -457.997861                              | -458.044055       |
| 3                           |                | OH              | -478.0416668            | -477.882523                               | -477.871751                              | -477.917621       |
| 4                           |                | F               | -502.0578569            | -501.911205                               | -501.900767                              | -501.946144       |
| 5                           |                | CHO             | -516.1296643            | -515.965252                               | -515.953621                              | -516.001872       |
| 6                           |                | CN              | -495.0585496            | -494.905249                               | -494.893789                              | -494.941619       |
| 7                           |                | NO <sub>2</sub> | -607.2757291            | -607.117974                               | -607.105825                              | -607.156256       |

| Octatetraene [Starting Material], (Hartree) |                 |                 |                         |                                           |                                          |                   |
|---------------------------------------------|-----------------|-----------------|-------------------------|-------------------------------------------|------------------------------------------|-------------------|
| Entry                                       | R <sub>1</sub>  | R <sub>2</sub>  | Total Electronic Energy | Sum of Electronic and Zero-Point Energies | Sum of Electronic and Thermal Enthalpies | Gibbs Free Energy |
| 1                                           | NO <sub>2</sub> | CH <sub>3</sub> | -554.3778669            | -554.191221                               | -554.178646                              | -554.230293       |

|   |  |                 |              |             |             |             |
|---|--|-----------------|--------------|-------------|-------------|-------------|
| 2 |  | NH <sub>2</sub> | -570.4204856 | -570.244919 | -570.231722 | -570.285208 |
| 3 |  | OH              | -590.2806856 | -590.118093 | -590.105828 | -590.156897 |
| 4 |  | F               | -614.294356  | -614.144008 | -614.131211 | -614.184687 |
| 5 |  | CHO             | -628.3609808 | -628.192613 | -628.178657 | -628.234946 |
| 6 |  | CN              | -607.2950379 | -607.137712 | -607.123942 | -607.180136 |
| 7 |  | NO <sub>2</sub> | -719.5059086 | -719.344186 | -719.329647 | -719.388551 |

| Transition State, (Hartree) |                 |                 |                         |                                           |                                          |                   |
|-----------------------------|-----------------|-----------------|-------------------------|-------------------------------------------|------------------------------------------|-------------------|
| Entry                       | R <sub>1</sub>  | R <sub>2</sub>  | Total Electronic Energy | Sum of Electronic and Zero-Point Energies | Sum of Electronic and Thermal Enthalpies | Gibbs Free Energy |
| 1                           | NO <sub>2</sub> | CH <sub>3</sub> | -554.3570465            | -554.170092                               | -554.157982                              | -554.20757        |
| 2                           |                 | NH <sub>2</sub> | -570.4000183            | -570.224054                               | -570.212255                              | -570.260806       |
| 3                           |                 | OH              | -590.2599159            | -590.096396                               | -590.084927                              | -590.13297        |
| 4                           |                 | F               | -614.2753918            | -614.124629                               | -614.113391                              | -614.161206       |
| 5                           |                 | CHO             | -628.3464345            | -628.177761                               | -628.165343                              | -628.215924       |
| 6                           |                 | CN              | -607.2749957            | -607.117475                               | -607.105205                              | -607.155534       |
| 7                           |                 | NO <sub>2</sub> | -719.4919699            | -719.329977                               | -719.317008                              | -719.369831       |

4.6 1,7-substituted

| Octatetraene [Starting Material], (Hartree) |                 |                 |                         |                                           |                                          |                   |
|---------------------------------------------|-----------------|-----------------|-------------------------|-------------------------------------------|------------------------------------------|-------------------|
| Entry                                       | R <sub>1</sub>  | R <sub>2</sub>  | Total Electronic Energy | Sum of Electronic and Zero-Point Energies | Sum of Electronic and Thermal Enthalpies | Gibbs Free Energy |
| 1                                           | CH <sub>3</sub> | CH <sub>3</sub> | -389.2368689            | -389.025408                               | -389.013626                              | -389.062927       |
| 2                                           |                 | NH <sub>2</sub> | -405.2782016            | -405.07759                                | -405.065282                              | -405.11573        |
| 3                                           |                 | OH              | -425.1411699            | -424.953964                               | -424.942435                              | -424.991145       |
| 4                                           |                 | F               | -449.1566851            | -448.981835                               | -448.969753                              | -449.020831       |
| 5                                           |                 | CHO             | -463.2230715            | -463.03044                                | -463.017382                              | -463.070264       |
| 6                                           |                 | CN              | -442.1570332            | -441.975081                               | -441.962992                              | -442.013436       |
| 7                                           |                 | NO <sub>2</sub> | -554.3695142            | -554.183684                               | -554.170033                              | -554.225376       |

| Transition State, (Hartree) |                 |                 |                         |                                           |                                          |                   |
|-----------------------------|-----------------|-----------------|-------------------------|-------------------------------------------|------------------------------------------|-------------------|
| Entry                       | R <sub>1</sub>  | R <sub>2</sub>  | Total Electronic Energy | Sum of Electronic and Zero-Point Energies | Sum of Electronic and Thermal Enthalpies | Gibbs Free Energy |
| 1                           | CH <sub>3</sub> | CH <sub>3</sub> | -389.2188947            | -389.007127                               | -388.995985                              | -389.042157       |
| 2                           |                 | NH <sub>2</sub> | -405.258788             | -405.057722                               | -405.046846                              | -405.092212       |
| 3                           |                 | OH              | -425.1200782            | -424.931893                               | -424.921319                              | -424.96613        |
| 4                           |                 | F               | -449.13677              | -448.960799                               | -448.950508                              | -448.994995       |
| 5                           |                 | CHO             | -463.2119075            | -463.018144                               | -463.006677                              | -463.053945       |
| 6                           |                 | CN              | -442.1420331            | -441.958924                               | -441.947698                              | -441.994462       |
| 7                           |                 | NO <sub>2</sub> | -554.3615735            | -554.174374                               | -554.162453                              | -554.211593       |

| Octatetraene [Starting Material], (Hartree) |                 |                 |                         |                                           |                                          |                   |
|---------------------------------------------|-----------------|-----------------|-------------------------|-------------------------------------------|------------------------------------------|-------------------|
| Entry                                       | R <sub>1</sub>  | R <sub>2</sub>  | Total Electronic Energy | Sum of Electronic and Zero-Point Energies | Sum of Electronic and Thermal Enthalpies | Gibbs Free Energy |
| 1                                           | NH <sub>2</sub> | CH <sub>3</sub> | -405.2785313            | -405.077677                               | -405.065413                              | -405.115859       |
| 2                                           |                 | NH <sub>2</sub> | -421.3197657            | -421.129962                               | -421.117881                              | -421.167738       |
| 3                                           |                 | OH              | -441.1827687            | -441.00601                                | -440.993976                              | -441.044066       |
| 4                                           |                 | F               | -465.1987287            | -465.034609                               | -465.022844                              | -465.072588       |
| 5                                           |                 | CHO             | -479.2652593            | -479.083617                               | -479.070758                              | -479.123091       |
| 6                                           |                 | CN              | -458.1995052            | -458.028446                               | -458.015737                              | -458.068173       |
| 7                                           |                 | NO <sub>2</sub> | -570.4121426            | -570.237141                               | -570.223725                              | -570.278164       |

| Transition State, (Hartree) |  |  |  |  |  |  |
|-----------------------------|--|--|--|--|--|--|
|-----------------------------|--|--|--|--|--|--|



| Entry | R <sub>1</sub>  | R <sub>2</sub>  | Total Electronic Energy | Sum of Electronic and Zero-Point Energies | Sum of Electronic and Thermal Enthalpies | Gibbs Free Energy |
|-------|-----------------|-----------------|-------------------------|-------------------------------------------|------------------------------------------|-------------------|
| 1     | NH <sub>2</sub> | CH <sub>3</sub> | -405.2591117            | -405.058082                               | -405.047237                              | -405.092688       |
| 2     |                 | NH <sub>2</sub> | -421.3015489            | -421.111249                               | -421.100756                              | -421.145233       |
| 3     |                 | OH              | -441.1621748            | -440.984651                               | -440.974354                              | -441.018536       |
| 4     |                 | F               | -465.1787369            | -465.013566                               | -465.003592                              | -465.047284       |
| 5     |                 | CHO             | -479.2521579            | -479.068937                               | -479.05789                               | -479.104172       |
| 6     |                 | CN              | -458.1846342            | -458.0123                                 | -458.001437                              | -458.047327       |
| 7     |                 | NO <sub>2</sub> | -570.4059441            | -570.229212                               | -570.217743                              | -570.265408       |

| Octatetraene [Starting Material], (Hartree) |                |                 |                         |                                           |                                          |                   |
|---------------------------------------------|----------------|-----------------|-------------------------|-------------------------------------------|------------------------------------------|-------------------|
| Entry                                       | R <sub>1</sub> | R <sub>2</sub>  | Total Electronic Energy | Sum of Electronic and Zero-Point Energies | Sum of Electronic and Thermal Enthalpies | Gibbs Free Energy |
| 1                                           | OH             | CH <sub>3</sub> | -425.1382624            | -424.949565                               | -424.937667                              | -424.987429       |
| 2                                           |                | NH <sub>2</sub> | -441.1797336            | -441.002188                               | -440.990478                              | -441.039585       |
| 3                                           |                | OH              | -461.042696             | -460.878246                               | -460.866592                              | -460.915825       |
| 4                                           |                | F               | -485.0581411            | -484.906245                               | -484.894894                              | -484.943676       |
| 5                                           |                | CHO             | -499.1243808            | -498.954924                               | -498.942464                              | -498.993993       |
| 6                                           |                | CN              | -478.0585291            | -477.89976                                | -477.887438                              | -477.938843       |
| 7                                           |                | NO <sub>2</sub> | -590.2709406            | -590.108155                               | -590.09514                               | -590.148737       |

| Transition State, (Hartree) |                |                 |                         |                                           |                                          |                   |
|-----------------------------|----------------|-----------------|-------------------------|-------------------------------------------|------------------------------------------|-------------------|
| Entry                       | R <sub>1</sub> | R <sub>2</sub>  | Total Electronic Energy | Sum of Electronic and Zero-Point Energies | Sum of Electronic and Thermal Enthalpies | Gibbs Free Energy |
| 1                           | OH             | CH <sub>3</sub> | -425.1183636            | -424.929594                               | -424.918995                              | -424.964019       |
| 2                           |                | NH <sub>2</sub> | -441.1587068            | -440.981348                               | -440.97094                               | -441.015431       |
| 3                           |                | OH              | -461.0193485            | -460.854316                               | -460.844214                              | -460.888139       |
| 4                           |                | F               | -485.035996             | -484.883582                               | -484.873783                              | -484.917343       |
| 5                           |                | CHO             | -499.1100895            | -498.939683                               | -498.928805                              | -498.974876       |
| 6                           |                | CN              | -478.0400999            | -477.880896                               | -477.870132                              | -477.915996       |
| 7                           |                | NO <sub>2</sub> | -590.2586601            | -590.09498                                | -590.083572                              | -590.131648       |

| Octatetraene [Starting Material], (Hartree) |                |                 |                         |                                           |                                          |                   |
|---------------------------------------------|----------------|-----------------|-------------------------|-------------------------------------------|------------------------------------------|-------------------|
| Entry                                       | R <sub>1</sub> | R <sub>2</sub>  | Total Electronic Energy | Sum of Electronic and Zero-Point Energies | Sum of Electronic and Thermal Enthalpies | Gibbs Free Energy |
| 1                                           | F              | CH <sub>3</sub> | -449.1527261            | -448.9768                                 | -448.965086                              | -449.015663       |
| 2                                           |                | NH <sub>2</sub> | -465.1939325            | -465.028973                               | -465.01754                               | -465.066287       |
| 3                                           |                | OH              | -485.0569954            | -484.905332                               | -484.893887                              | -484.943156       |
| 4                                           |                | F               | -509.072149             | -508.933168                               | -508.922853                              | -508.969148       |
| 5                                           |                | CHO             | -523.1382615            | -522.98127                                | -522.969137                              | -523.020086       |
| 6                                           |                | CN              | -502.0721548            | -501.925965                               | -501.913879                              | -501.965982       |
| 7                                           |                | NO <sub>2</sub> | -614.284553             | -614.134233                               | -614.12153                               | -614.174806       |

| Transition State, (Hartree) |                |                 |                         |                                           |                                          |                   |
|-----------------------------|----------------|-----------------|-------------------------|-------------------------------------------|------------------------------------------|-------------------|
| Entry                       | R <sub>1</sub> | R <sub>2</sub>  | Total Electronic Energy | Sum of Electronic and Zero-Point Energies | Sum of Electronic and Thermal Enthalpies | Gibbs Free Energy |
| 1                           | F              | CH <sub>3</sub> | -449.1324741            | -448.956512                               | -448.945988                              | -448.991602       |
| 2                           |                | NH <sub>2</sub> | -465.172752             | -465.007902                               | -464.997697                              | -465.042023       |
| 3                           |                | OH              | -485.0342287            | -484.882084                               | -484.87218                               | -484.915939       |
| 4                           |                | F               | -509.0494867            | -508.909794                               | -508.900203                              | -508.943545       |
| 5                           |                | CHO             | -523.1222599            | -522.964722                               | -522.953971                              | -523.000125       |
| 6                           |                | CN              | -502.0528739            | -501.906224                               | -501.895686                              | -501.941346       |
| 7                           |                | NO <sub>2</sub> | -614.2710983            | -614.120025                               | -614.108817                              | -614.156858       |

| Octatetraene [Starting Material], (Hartree) |  |  |  |  |  |  |
|---------------------------------------------|--|--|--|--|--|--|
|---------------------------------------------|--|--|--|--|--|--|

| Entry | R <sub>1</sub> | R <sub>2</sub>  | Total Electronic Energy | Sum of Electronic and Zero-Point Energies | Sum of Electronic and Thermal Enthalpies | Gibbs Free Energy |
|-------|----------------|-----------------|-------------------------|-------------------------------------------|------------------------------------------|-------------------|
| 1     | CHO            | CH <sub>3</sub> | -463.2251862            | -463.03174                                | -463.018888                              | -463.071456       |
| 2     |                | NH <sub>2</sub> | -479.2664311            | -479.084323                               | -479.0716                                | -479.12361        |
| 3     |                | OH              | -499.1297011            | -498.960423                               | -498.947832                              | -498.999807       |
| 4     |                | F               | -523.1442219            | -522.98747                                | -522.975176                              | -523.026708       |
| 5     |                | CHO             | -537.209885             | -537.035432                               | -537.022076                              | -537.076068       |
| 6     |                | CN              | -516.1436975            | -515.980204                               | -515.966855                              | -516.021959       |
| 7     |                | NO <sub>2</sub> | -628.3558051            | -628.188397                               | -628.174388                              | -628.231417       |

| Transition State, (Hartree) |                |                 |                         |                                           |                                          |                   |
|-----------------------------|----------------|-----------------|-------------------------|-------------------------------------------|------------------------------------------|-------------------|
| Entry                       | R <sub>1</sub> | R <sub>2</sub>  | Total Electronic Energy | Sum of Electronic and Zero-Point Energies | Sum of Electronic and Thermal Enthalpies | Gibbs Free Energy |
| 1                           | CHO            | CH <sub>3</sub> | -463.2083063            | -463.014857                               | -463.003146                              | -463.051439       |
| 2                           |                | NH <sub>2</sub> | -479.2478859            | -479.065459                               | -479.054071                              | -479.101339       |
| 3                           |                | OH              | -499.1080466            | -498.938451                               | -498.927246                              | -498.97427        |
| 4                           |                | F               | -523.1246256            | -522.967425                               | -522.956607                              | -523.002988       |
| 5                           |                | CHO             | -537.1990928            | -537.023884                               | -537.011947                              | -537.06106        |
| 6                           |                | CN              | -516.1281056            | -515.963851                               | -515.952055                              | -516.000882       |
| 7                           |                | NO <sub>2</sub> | -628.3468901            | -628.178348                               | -628.165831                              | -628.217208       |

| Octatetraene [Starting Material], (Hartree) |                |                 |                         |                                           |                                          |                   |
|---------------------------------------------|----------------|-----------------|-------------------------|-------------------------------------------|------------------------------------------|-------------------|
| Entry                                       | R <sub>1</sub> | R <sub>2</sub>  | Total Electronic Energy | Sum of Electronic and Zero-Point Energies | Sum of Electronic and Thermal Enthalpies | Gibbs Free Energy |
| 1                                           | CN             | CH <sub>3</sub> | -442.1615644            | -441.979035                               | -441.966465                              | -442.018721       |
| 2                                           |                | NH <sub>2</sub> | -458.2026952            | -458.031354                               | -458.019006                              | -458.069932       |
| 3                                           |                | OH              | -478.0660033            | -477.907596                               | -477.895341                              | -477.946765       |
| 4                                           |                | F               | -502.0803656            | -501.934719                               | -501.923557                              | -501.971892       |
| 5                                           |                | CHO             | -516.1458671            | -515.982056                               | -515.969051                              | -516.02215        |
| 6                                           |                | CN              | -495.079483             | -494.92699                                | -494.913964                              | -494.968389       |
| 7                                           |                | NO <sub>2</sub> | -607.2916737            | -607.134853                               | -607.121251                              | -607.17663        |

| Transition State, (Hartree) |                |                 |                         |                                           |                                          |                   |
|-----------------------------|----------------|-----------------|-------------------------|-------------------------------------------|------------------------------------------|-------------------|
| Entry                       | R <sub>1</sub> | R <sub>2</sub>  | Total Electronic Energy | Sum of Electronic and Zero-Point Energies | Sum of Electronic and Thermal Enthalpies | Gibbs Free Energy |
| 1                           | CN             | CH <sub>3</sub> | -442.1413612            | -441.958645                               | -441.947278                              | -441.994717       |
| 2                           |                | NH <sub>2</sub> | -458.1820312            | -458.010246                               | -457.999229                              | -458.045557       |
| 3                           |                | OH              | -478.0404036            | -477.881469                               | -477.870615                              | -477.916774       |
| 4                           |                | F               | -502.0564291            | -501.909914                               | -501.899438                              | -501.944979       |
| 5                           |                | CHO             | -516.1310763            | -515.966472                               | -515.954899                              | -516.003071       |
| 6                           |                | CN              | -495.0588466            | -494.905442                               | -494.894024                              | -494.941849       |
| 7                           |                | NO <sub>2</sub> | -607.2766925            | -607.118659                               | -607.106542                              | -607.156895       |

| Octatetraene [Starting Material], (Hartree) |                 |                 |                         |                                           |                                          |                   |
|---------------------------------------------|-----------------|-----------------|-------------------------|-------------------------------------------|------------------------------------------|-------------------|
| Entry                                       | R <sub>1</sub>  | R <sub>2</sub>  | Total Electronic Energy | Sum of Electronic and Zero-Point Energies | Sum of Electronic and Thermal Enthalpies | Gibbs Free Energy |
| 1                                           | NO <sub>2</sub> | CH <sub>3</sub> | -554.3735638            | -554.186531                               | -554.174114                              | -554.226024       |
| 2                                           |                 | NH <sub>2</sub> | -570.4147983            | -570.238723                               | -570.225697                              | -570.27909        |
| 3                                           |                 | OH              | -590.2778754            | -590.114852                               | -590.101874                              | -590.15601        |
| 4                                           |                 | F               | -614.2919282            | -614.141601                               | -614.128841                              | -614.183202       |
| 5                                           |                 | CHO             | -628.357532             | -628.189392                               | -628.175625                              | -628.2314         |
| 6                                           |                 | CN              | -607.2908619            | -607.133628                               | -607.119897                              | -607.177209       |
| 7                                           |                 | NO <sub>2</sub> | -719.5031421            | -719.341664                               | -719.327364                              | -719.385292       |

| Transition State, (Hartree) |                 |                 |                         |                                           |                                          |                   |
|-----------------------------|-----------------|-----------------|-------------------------|-------------------------------------------|------------------------------------------|-------------------|
| Entry                       | R <sub>1</sub>  | R <sub>2</sub>  | Total Electronic Energy | Sum of Electronic and Zero-Point Energies | Sum of Electronic and Thermal Enthalpies | Gibbs Free Energy |
| 1                           | NO <sub>2</sub> | CH <sub>3</sub> | -554.3596279            | -554.172274                               | -554.16025                               | -554.209559       |
| 2                           |                 | NH <sub>2</sub> | -570.4006013            | -570.224482                               | -570.212646                              | -570.26164        |
| 3                           |                 | OH              | -590.2577871            | -590.094236                               | -590.082634                              | -590.130956       |
| 4                           |                 | F               | -614.2733023            | -614.122207                               | -614.110968                              | -614.158842       |
| 5                           |                 | CHO             | -628.3484451            | -628.179545                               | -628.167194                              | -628.217726       |
| 6                           |                 | CN              | -607.2750634            | -607.117034                               | -607.104824                              | -607.155083       |
| 7                           |                 | NO <sub>2</sub> | -719.4929734            | -719.330632                               | -719.317806                              | -719.370064       |

4.7 1,8-substituted

| Octatetraene [Starting Material], (Hartree) |                 |                 |                         |                                           |                                          |                   |
|---------------------------------------------|-----------------|-----------------|-------------------------|-------------------------------------------|------------------------------------------|-------------------|
| Entry                                       | R <sub>1</sub>  | R <sub>2</sub>  | Total Electronic Energy | Sum of Electronic and Zero-Point Energies | Sum of Electronic and Thermal Enthalpies | Gibbs Free Energy |
| 1                                           | CH <sub>3</sub> | CH <sub>3</sub> | -389.2391428            | -389.028401                               | -389.015199                              | -389.069414       |
| 2                                           |                 | NH <sub>2</sub> | -405.2806251            | -405.080388                               | -405.067563                              | -405.120257       |
| 3                                           |                 | OH              | -425.1405015            | -424.952598                               | -424.940141                              | -424.991987       |
| 4                                           |                 | F               | -449.154962             | -448.980096                               | -448.968697                              | -449.017984       |
| 5                                           |                 | CHO             | -463.2277779            | -463.034998                               | -463.021653                              | -463.075892       |
| 6                                           |                 | CN              | -442.1641436            | -441.982267                               | -441.97007                               | -442.021331       |
| 7                                           |                 | NO <sub>2</sub> | -554.3763249            | -554.189664                               | -554.176004                              | -554.231618       |

| Transition State, (Hartree) |                 |                 |                         |                                           |                                          |                   |
|-----------------------------|-----------------|-----------------|-------------------------|-------------------------------------------|------------------------------------------|-------------------|
| Entry                       | R <sub>1</sub>  | R <sub>2</sub>  | Total Electronic Energy | Sum of Electronic and Zero-Point Energies | Sum of Electronic and Thermal Enthalpies | Gibbs Free Energy |
| 1                           | CH <sub>3</sub> | CH <sub>3</sub> | -389.2204067            | -389.007976                               | -388.997102                              | -389.042325       |
| 2                           |                 | NH <sub>2</sub> | -405.2614831            | -405.059961                               | -405.04932                               | -405.094041       |
| 3                           |                 | OH              | -425.1201271            | -424.931508                               | -424.920911                              | -424.965776       |
| 4                           |                 | F               | -449.134492             | -448.958386                               | -448.948032                              | -448.992626       |
| 5                           |                 | CHO             | -463.2111896            | -463.017011                               | -463.00566                               | -463.052573       |
| 6                           |                 | CN              | -442.1443071            | -441.961126                               | -441.94993                               | -441.996601       |
| 7                           |                 | NO <sub>2</sub> | -554.3631783            | -554.175654                               | -554.163776                              | -554.212427       |

| Octatetraene [Starting Material], (Hartree) |                 |                 |                         |                                           |                                          |                   |
|---------------------------------------------|-----------------|-----------------|-------------------------|-------------------------------------------|------------------------------------------|-------------------|
| Entry                                       | R <sub>1</sub>  | R <sub>2</sub>  | Total Electronic Energy | Sum of Electronic and Zero-Point Energies | Sum of Electronic and Thermal Enthalpies | Gibbs Free Energy |
| 1                                           | NH <sub>2</sub> | NH <sub>2</sub> | -421.3216644            | -421.131899                               | -421.119545                              | -421.170248       |
| 2                                           |                 | OH              | -441.1819402            | -441.004763                               | -440.99256                               | -441.043894       |
| 3                                           |                 | F               | -465.1966764            | -465.031933                               | -465.02011                               | -465.070283       |
| 4                                           |                 | CHO             | -479.2704901            | -479.088392                               | -479.075373                              | -479.128354       |
| 5                                           |                 | CN              | -458.2069055            | -458.035376                               | -458.022765                              | -458.074549       |
| 6                                           |                 | NO <sub>2</sub> | -570.419636             | -570.24376                                | -570.230367                              | -570.284979       |

| Transition State, (Hartree) |                 |                 |                         |                                           |                                          |                   |
|-----------------------------|-----------------|-----------------|-------------------------|-------------------------------------------|------------------------------------------|-------------------|
| Entry                       | R <sub>1</sub>  | R <sub>2</sub>  | Total Electronic Energy | Sum of Electronic and Zero-Point Energies | Sum of Electronic and Thermal Enthalpies | Gibbs Free Energy |
| 1                           | NH <sub>2</sub> | NH <sub>2</sub> | -421.3008184            | -421.110073                               | -421.099619                              | -421.143884       |
| 2                           |                 | OH              | -441.1608563            | -440.983073                               | -440.972737                              | -441.016851       |
| 3                           |                 | F               | -465.1770782            | -465.011667                               | -465.00165                               | -465.045385       |
| 4                           |                 | CHO             | -479.2581905            | -479.074314                               | -479.063453                              | -479.109114       |
| 5                           |                 | CN              | -458.1911482            | -458.018695                               | -458.007912                              | -458.053528       |

|   |  |                 |              |             |             |             |
|---|--|-----------------|--------------|-------------|-------------|-------------|
| 6 |  | NO <sub>2</sub> | -570.4141847 | -570.237174 | -570.225705 | -570.273258 |
|---|--|-----------------|--------------|-------------|-------------|-------------|

| Octatetraene [Starting Material], (Hartree) |                |                 |                         |                                           |                                          |                   |
|---------------------------------------------|----------------|-----------------|-------------------------|-------------------------------------------|------------------------------------------|-------------------|
| Entry                                       | R <sub>1</sub> | R <sub>2</sub>  | Total Electronic Energy | Sum of Electronic and Zero-Point Energies | Sum of Electronic and Thermal Enthalpies | Gibbs Free Energy |
| 1                                           | OH             | OH              | -461.0417674            | -460.876777                               | -460.865026                              | -460.915025       |
| 2                                           |                | F               | -485.0561952            | -484.90383                                | -484.892364                              | -484.941805       |
| 3                                           |                | CHO             | -499.1289612            | -498.959232                               | -498.946539                              | -498.999069       |
| 4                                           |                | CN              | -478.0652515            | -477.906394                               | -477.894007                              | -477.946038       |
| 5                                           |                | NO <sub>2</sub> | -590.2774682            | -590.114038                               | -590.100959                              | -590.155253       |

| Transition State, (Hartree) |                |                 |                         |                                           |                                          |                   |
|-----------------------------|----------------|-----------------|-------------------------|-------------------------------------------|------------------------------------------|-------------------|
| Entry                       | R <sub>1</sub> | R <sub>2</sub>  | Total Electronic Energy | Sum of Electronic and Zero-Point Energies | Sum of Electronic and Thermal Enthalpies | Gibbs Free Energy |
| 1                           | OH             | OH              | -461.0217077            | -460.856596                               | -460.846457                              | -460.890231       |
| 2                           |                | F               | -485.0333862            | -484.880645                               | -484.870804                              | -484.914321       |
| 3                           |                | CHO             | -499.1089634            | -498.938298                               | -498.927384                              | -498.97365        |
| 4                           |                | CN              | -478.0448018            | -477.88533                                | -477.874645                              | -477.920258       |
| 5                           |                | NO <sub>2</sub> | -590.2652723            | -590.101101                               | -590.089765                              | -590.1372         |

| Octatetraene [Starting Material], (Hartree) |                |                 |                         |                                           |                                          |                   |
|---------------------------------------------|----------------|-----------------|-------------------------|-------------------------------------------|------------------------------------------|-------------------|
| Entry                                       | R <sub>1</sub> | R <sub>2</sub>  | Total Electronic Energy | Sum of Electronic and Zero-Point Energies | Sum of Electronic and Thermal Enthalpies | Gibbs Free Energy |
| 1                                           | F              | F               | -509.0706281            | -508.93128                                | -508.920019                              | -508.969505       |
| 2                                           |                | CHO             | -523.1428111            | -522.986101                               | -522.973541                              | -523.02668        |
| 3                                           |                | CN              | -502.07929              | -501.932679                               | -501.920685                              | -501.971659       |
| 4                                           |                | NO <sub>2</sub> | -614.2911335            | -614.14054                                | -614.127682                              | -614.182048       |

| Transition State, (Hartree) |                |                 |                         |                                           |                                          |                   |
|-----------------------------|----------------|-----------------|-------------------------|-------------------------------------------|------------------------------------------|-------------------|
| Entry                       | R <sub>1</sub> | R <sub>2</sub>  | Total Electronic Energy | Sum of Electronic and Zero-Point Energies | Sum of Electronic and Thermal Enthalpies | Gibbs Free Energy |
| 1                           | F              | F               | -509.0455751            | -508.905454                               | -508.895847                              | -508.939176       |
| 2                           |                | CHO             | -523.1213939            | -522.963449                               | -522.952666                              | -522.998931       |
| 3                           |                | CN              | -502.0538252            | -501.906628                               | -501.896172                              | -501.941611       |
| 4                           |                | NO <sub>2</sub> | -614.2713922            | -614.119922                               | -614.108648                              | -614.15662        |

| Octatetraene [Starting Material], (Hartree) |                |                 |                         |                                           |                                          |                   |
|---------------------------------------------|----------------|-----------------|-------------------------|-------------------------------------------|------------------------------------------|-------------------|
| Entry                                       | R <sub>1</sub> | R <sub>2</sub>  | Total Electronic Energy | Sum of Electronic and Zero-Point Energies | Sum of Electronic and Thermal Enthalpies | Gibbs Free Energy |
| 1                                           | CHO            | CHO             | -537.2138395            | -537.039202                               | -537.025611                              | -537.080526       |
| 2                                           |                | CN              | -516.1500607            | -515.986329                               | -515.972983                              | -516.028353       |
| 3                                           |                | NO <sub>2</sub> | -628.3613137            | -628.19347                                | -628.180179                              | -628.235263       |

| Transition State, (Hartree) |                |                 |                         |                                           |                                          |                   |
|-----------------------------|----------------|-----------------|-------------------------|-------------------------------------------|------------------------------------------|-------------------|
| Entry                       | R <sub>1</sub> | R <sub>2</sub>  | Total Electronic Energy | Sum of Electronic and Zero-Point Energies | Sum of Electronic and Thermal Enthalpies | Gibbs Free Energy |
| 1                           | CHO            | CHO             | -537.1963266            | -537.020628                               | -537.008697                              | -537.057686       |
| 2                           |                | CN              | -516.1269269            | -515.96245                                | -515.950749                              | -515.999268       |
| 3                           |                | NO <sub>2</sub> | -628.3443478            | -628.175569                               | -628.163096                              | -628.213922       |

| Octatetraene [Starting Material], (Hartree) |                |                |                         |                                           |                                          |                   |
|---------------------------------------------|----------------|----------------|-------------------------|-------------------------------------------|------------------------------------------|-------------------|
| Entry                                       | R <sub>1</sub> | R <sub>2</sub> | Total Electronic Energy | Sum of Electronic and Zero-Point Energies | Sum of Electronic and Thermal Enthalpies | Gibbs Free Energy |

|   |    |                 |              |             |             |             |
|---|----|-----------------|--------------|-------------|-------------|-------------|
| 1 | CN | CN              | -495.0864125 | -494.933421 | -494.920442 | -494.974598 |
| 2 |    | NO <sub>2</sub> | -607.2977085 | -607.140089 | -607.126395 | -607.183414 |

| Transition State, (Hartree) |                |                 |                         |                                           |                                          |                   |
|-----------------------------|----------------|-----------------|-------------------------|-------------------------------------------|------------------------------------------|-------------------|
| Entry                       | R <sub>1</sub> | R <sub>2</sub>  | Total Electronic Energy | Sum of Electronic and Zero-Point Energies | Sum of Electronic and Thermal Enthalpies | Gibbs Free Energy |
| 1                           | CN             | CN              | -495.0582366            | -494.904282                               | -494.892951                              | -494.940473       |
| 2                           |                | NO <sub>2</sub> | -607.2751045            | -607.116994                               | -607.104847                              | -607.154858       |

| Octatetraene [Starting Material], (Hartree) |                 |                 |                         |                                           |                                          |                   |
|---------------------------------------------|-----------------|-----------------|-------------------------|-------------------------------------------|------------------------------------------|-------------------|
| Entry                                       | R <sub>1</sub>  | R <sub>2</sub>  | Total Electronic Energy | Sum of Electronic and Zero-Point Energies | Sum of Electronic and Thermal Enthalpies | Gibbs Free Energy |
| 1                                           | NO <sub>2</sub> | NO <sub>2</sub> | -719.5086531            | -719.346981                               | -719.333326                              | -719.390498       |

| Transition State, (Hartree) |                 |                 |                         |                                           |                                          |                   |
|-----------------------------|-----------------|-----------------|-------------------------|-------------------------------------------|------------------------------------------|-------------------|
| Entry                       | R <sub>1</sub>  | R <sub>2</sub>  | Total Electronic Energy | Sum of Electronic and Zero-Point Energies | Sum of Electronic and Thermal Enthalpies | Gibbs Free Energy |
| 1                           | NO <sub>2</sub> | NO <sub>2</sub> | -719.4903689            | -719.3278                                 | -719.314946                              | -719.366917       |

4.8 2,3-substituted

| Octatetraene [Starting Material], (Hartree) |                 |                 |                         |                                           |                                          |                   |
|---------------------------------------------|-----------------|-----------------|-------------------------|-------------------------------------------|------------------------------------------|-------------------|
| Entry                                       | R <sub>1</sub>  | R <sub>2</sub>  | Total Electronic Energy | Sum of Electronic and Zero-Point Energies | Sum of Electronic and Thermal Enthalpies | Gibbs Free Energy |
| 1                                           | CH <sub>3</sub> | CH <sub>3</sub> | -389.2350549            | -389.023724                               | -389.012196                              | -389.060199       |
| 2                                           |                 | NH <sub>2</sub> | -405.2775788            | -405.077457                               | -405.065185                              | -405.114824       |
| 3                                           |                 | OH              | -425.1380986            | -424.950415                               | -424.938355                              | -424.988257       |
| 4                                           |                 | F               | -449.1554138            | -448.980004                               | -448.968352                              | -448.968352       |
| 5                                           |                 | CHO             | -463.2264231            | -463.034485                               | -463.021214                              | -463.074265       |
| 6                                           |                 | CN              | -442.1583523            | -441.97632                                | -441.964511                              | -442.013519       |
| 7                                           |                 | NO <sub>2</sub> | -554.3772419            | -554.191802                               | -554.178976                              | -554.230542       |

| Transition State, (Hartree) |                 |                 |                         |                                           |                                          |                   |
|-----------------------------|-----------------|-----------------|-------------------------|-------------------------------------------|------------------------------------------|-------------------|
| Entry                       | R <sub>1</sub>  | R <sub>2</sub>  | Total Electronic Energy | Sum of Electronic and Zero-Point Energies | Sum of Electronic and Thermal Enthalpies | Gibbs Free Energy |
| 1                           | CH <sub>3</sub> | CH <sub>3</sub> | -389.2146814            | -389.002744                               | -388.991778                              | -389.03726        |
| 2                           |                 | NH <sub>2</sub> | -405.2555387            | -405.054523                               | -405.043811                              | -405.088639       |
| 3                           |                 | OH              | -425.1186077            | -424.930387                               | -424.919819                              | -424.964507       |
| 4                           |                 | F               | -449.1362287            | -448.96049                                | -448.950207                              | -448.994488       |
| 5                           |                 | CHO             | -463.2048606            | -463.01145                                | -462.99997                               | -463.04725        |
| 6                           |                 | CN              | -442.140207             | -441.957856                               | -441.946552                              | -441.993324       |
| 7                           |                 | NO <sub>2</sub> | -554.3532653            | -554.166327                               | -554.15446                               | -554.202972       |

| Octatetraene [Starting Material], (Hartree) |                 |                 |                         |                                           |                                          |                   |
|---------------------------------------------|-----------------|-----------------|-------------------------|-------------------------------------------|------------------------------------------|-------------------|
| Entry                                       | R <sub>1</sub>  | R <sub>2</sub>  | Total Electronic Energy | Sum of Electronic and Zero-Point Energies | Sum of Electronic and Thermal Enthalpies | Gibbs Free Energy |
| 1                                           | NH <sub>2</sub> | CH <sub>3</sub> | -405.2784417            | -405.078378                               | -405.066066                              | -405.116067       |
| 2                                           |                 | NH <sub>2</sub> | -421.3203803            | -421.131195                               | -421.119219                              | -421.1679         |
| 3                                           |                 | OH              | -441.1792527            | -441.002868                               | -440.99104                               | -441.039727       |
| 4                                           |                 | F               | -465.1948148            | -465.031049                               | -465.019455                              | -465.067964       |
| 5                                           |                 | CHO             | -479.2686277            | -479.087075                               | -479.074336                              | -479.125477       |
| 6                                           |                 | CN              | -458.1997586            | -458.028868                               | -458.016413                              | -458.06698        |

|   |  |                 |              |             |             |             |
|---|--|-----------------|--------------|-------------|-------------|-------------|
| 7 |  | NO <sub>2</sub> | -570.4169017 | -570.241983 | -570.228727 | -570.281554 |
|---|--|-----------------|--------------|-------------|-------------|-------------|

| Transition State, (Hartree) |                 |                 |                         |                                           |                                          |                   |
|-----------------------------|-----------------|-----------------|-------------------------|-------------------------------------------|------------------------------------------|-------------------|
| Entry                       | R <sub>1</sub>  | R <sub>2</sub>  | Total Electronic Energy | Sum of Electronic and Zero-Point Energies | Sum of Electronic and Thermal Enthalpies | Gibbs Free Energy |
| 1                           | NH <sub>2</sub> | CH <sub>3</sub> | -405.2539651            | -405.053297                               | -405.042406                              | -405.087694       |
| 2                           |                 | NH <sub>2</sub> | -421.2950469            | -421.105097                               | -421.094498                              | -421.139053       |
| 3                           |                 | OH              | -441.158761             | -440.981681                               | -440.971258                              | -441.015518       |
| 4                           |                 | F               | -465.175244             | -465.010805                               | -465.000661                              | -465.044578       |
| 5                           |                 | CHO             | -479.2445503            | -479.062924                               | -479.051437                              | -479.098585       |
| 6                           |                 | CN              | -458.1808369            | -458.009609                               | -457.998453                              | -458.044833       |
| 7                           |                 | NO <sub>2</sub> | -570.393341             | -570.217672                               | -570.205865                              | -570.254669       |

| Octatetraene [Starting Material], (Hartree) |                |                 |                         |                                           |                                          |                   |
|---------------------------------------------|----------------|-----------------|-------------------------|-------------------------------------------|------------------------------------------|-------------------|
| Entry                                       | R <sub>1</sub> | R <sub>2</sub>  | Total Electronic Energy | Sum of Electronic and Zero-Point Energies | Sum of Electronic and Thermal Enthalpies | Gibbs Free Energy |
| 1                                           | OH             | CH <sub>3</sub> | -425.1406862            | -424.953265                               | -424.941144                              | -424.991151       |
| 2                                           |                | NH <sub>2</sub> | -441.1799997            | -441.004008                               | -440.992059                              | -441.041173       |
| 3                                           |                | OH              | -461.0405927            | -460.877453                               | -460.866454                              | -460.913509       |
| 4                                           |                | F               | -485.0567741            | -484.90623                                | -484.895503                              | -484.941913       |
| 5                                           |                | CHO             | -499.1290989            | -498.960116                               | -498.947593                              | -498.998423       |
| 6                                           |                | CN              | -478.0622716            | -477.904509                               | -477.892058                              | -477.943767       |
| 7                                           |                | NO <sub>2</sub> | -590.2718906            | -590.11001                                | -590.096846                              | -590.150396       |

| Transition State, (Hartree) |                |                 |                         |                                           |                                          |                   |
|-----------------------------|----------------|-----------------|-------------------------|-------------------------------------------|------------------------------------------|-------------------|
| Entry                       | R <sub>1</sub> | R <sub>2</sub>  | Total Electronic Energy | Sum of Electronic and Zero-Point Energies | Sum of Electronic and Thermal Enthalpies | Gibbs Free Energy |
| 1                           | OH             | CH <sub>3</sub> | -425.1174972            | -424.929341                               | -424.918778                              | -424.963454       |
| 2                           |                | NH <sub>2</sub> | -441.1573654            | -440.980148                               | -440.969798                              | -441.013868       |
| 3                           |                | OH              | -461.0131736            | -460.848906                               | -460.83873                               | -460.882584       |
| 4                           |                | F               | -485.030923             | -484.879166                               | -484.869283                              | -484.912735       |
| 5                           |                | CHO             | -498.998423             | -498.938575                               | -498.927514                              | -498.973946       |
| 6                           |                | CN              | -478.0380296            | -477.879552                               | -477.868637                              | -477.914619       |
| 7                           |                | NO <sub>2</sub> | -590.2575962            | -590.094566                               | -590.083072                              | -590.131504       |

| Octatetraene [Starting Material], (Hartree) |                |                 |                         |                                           |                                          |                   |
|---------------------------------------------|----------------|-----------------|-------------------------|-------------------------------------------|------------------------------------------|-------------------|
| Entry                                       | R <sub>1</sub> | R <sub>2</sub>  | Total Electronic Energy | Sum of Electronic and Zero-Point Energies | Sum of Electronic and Thermal Enthalpies | Gibbs Free Energy |
| 1                                           | F              | CH <sub>3</sub> | -449.1571923            | -448.982198                               | -448.970369                              | -449.019781       |
| 2                                           |                | NH <sub>2</sub> | -465.1952424            | -465.031521                               | -465.019889                              | -465.068455       |
| 3                                           |                | OH              | -485.055641             | -484.905106                               | -484.894364                              | -484.941172       |
| 4                                           |                | F               | -509.0707199            | -508.9328                                 | -508.922326                              | -508.968577       |
| 5                                           |                | CHO             | -523.1439215            | -522.98754                                | -522.97527                               | -523.025874       |
| 6                                           |                | CN              | -502.0762461            | -501.931076                               | -501.91883                               | -501.970704       |
| 7                                           |                | NO <sub>2</sub> | -614.2860064            | -614.136317                               | -614.125259                              | -614.17333        |

| Transition State, (Hartree) |                |                 |                         |                                           |                                          |                   |
|-----------------------------|----------------|-----------------|-------------------------|-------------------------------------------|------------------------------------------|-------------------|
| Entry                       | R <sub>1</sub> | R <sub>2</sub>  | Total Electronic Energy | Sum of Electronic and Zero-Point Energies | Sum of Electronic and Thermal Enthalpies | Gibbs Free Energy |
| 1                           | F              | CH <sub>3</sub> | -449.1340309            | -448.958525                               | -448.948165                              | -448.992673       |
| 2                           |                | NH <sub>2</sub> | -465.1719487            | -465.007531                               | -464.997442                              | -465.041154       |
| 3                           |                | OH              | -485.0294761            | -484.877696                               | -484.86781                               | -484.911289       |
| 4                           |                | F               | -509.0460192            | -508.90673                                | -508.897145                              | -508.940225       |
| 5                           |                | CHO             | -523.1232912            | -522.966149                               | -522.955395                              | -523.001319       |

|   |  |                 |              |             |             |             |
|---|--|-----------------|--------------|-------------|-------------|-------------|
| 6 |  | CN              | -502.052339  | -501.906237 | -501.895678 | -501.941105 |
| 7 |  | NO <sub>2</sub> | -614.2634776 | -614.11297  | -614.101751 | -614.149163 |

| Octatetraene [Starting Material], (Hartree) |                |                 |                         |                                           |                                          |                   |
|---------------------------------------------|----------------|-----------------|-------------------------|-------------------------------------------|------------------------------------------|-------------------|
| Entry                                       | R <sub>1</sub> | R <sub>2</sub>  | Total Electronic Energy | Sum of Electronic and Zero-Point Energies | Sum of Electronic and Thermal Enthalpies | Gibbs Free Energy |
| 1                                           | CHO            | CH <sub>3</sub> | -463.2247273            | -463.032537                               | -463.019498                              | -463.071688       |
| 2                                           |                | NH <sub>2</sub> | -479.2662692            | -479.08494                                | -479.072217                              | -479.123396       |
| 3                                           |                | OH              | -499.1257181            | -498.956967                               | -498.94449                               | -498.995254       |
| 4                                           |                | F               | -523.1397389            | -522.983551                               | -522.971313                              | -523.021781       |
| 5                                           |                | CHO             | -537.2136472            | -537.040158                               | -537.026633                              | -537.080218       |
| 6                                           |                | CN              | -516.144265             | -515.981011                               | -515.967874                              | -516.020505       |
| 7                                           |                | NO <sub>2</sub> | -628.3595023            | -628.192342                               | -628.178343                              | -628.233824       |

| Transition State, (Hartree) |                |                 |                         |                                           |                                          |                   |
|-----------------------------|----------------|-----------------|-------------------------|-------------------------------------------|------------------------------------------|-------------------|
| Entry                       | R <sub>1</sub> | R <sub>2</sub>  | Total Electronic Energy | Sum of Electronic and Zero-Point Energies | Sum of Electronic and Thermal Enthalpies | Gibbs Free Energy |
| 1                           | CHO            | CH <sub>3</sub> | -463.203549             | -463.010056                               | -462.998554                              | -463.045987       |
| 2                           |                | NH <sub>2</sub> | -479.2453738            | -479.062925                               | -479.05165                               | -479.098486       |
| 3                           |                | OH              | -499.1079325            | -498.938164                               | -498.927054                              | -498.973584       |
| 4                           |                | F               | -523.1239775            | -522.96686                                | -522.956041                              | -523.002201       |
| 5                           |                | CHO             | -537.1921636            | -537.017108                               | -537.00519                               | -537.054191       |
| 6                           |                | CN              | -516.1265611            | -515.962748                               | -515.95093                               | -515.99949        |
| 7                           |                | NO <sub>2</sub> | -628.3407468            | -628.172087                               | -628.159779                              | -628.209932       |

| Octatetraene [Starting Material], (Hartree) |                |                 |                         |                                           |                                          |                   |
|---------------------------------------------|----------------|-----------------|-------------------------|-------------------------------------------|------------------------------------------|-------------------|
| Entry                                       | R <sub>1</sub> | R <sub>2</sub>  | Total Electronic Energy | Sum of Electronic and Zero-Point Energies | Sum of Electronic and Thermal Enthalpies | Gibbs Free Energy |
| 1                                           | CN             | CH <sub>3</sub> | -442.1568224            | -441.975341                               | -441.96253                               | -442.014852       |
| 2                                           |                | NH <sub>2</sub> | -458.1970352            | -458.026158                               | -458.01371                               | -458.064139       |
| 3                                           |                | OH              | -478.0576038            | -477.89966                                | -477.887298                              | -477.93827        |
| 4                                           |                | F               | -502.0725609            | -501.927395                               | -501.916125                              | -501.964128       |
| 5                                           |                | CHO             | -516.1448822            | -515.982133                               | -515.968765                              | -516.022321       |
| 6                                           |                | CN              | -495.0763465            | -494.924512                               | -494.912236                              | -494.962943       |
| 7                                           |                | NO <sub>2</sub> | -607.2847553            | -607.128063                               | -607.116118                              | -607.166307       |

| Transition State, (Hartree) |                |                 |                         |                                           |                                          |                   |
|-----------------------------|----------------|-----------------|-------------------------|-------------------------------------------|------------------------------------------|-------------------|
| Entry                       | R <sub>1</sub> | R <sub>2</sub>  | Total Electronic Energy | Sum of Electronic and Zero-Point Energies | Sum of Electronic and Thermal Enthalpies | Gibbs Free Energy |
| 1                           | CN             | CH <sub>3</sub> | -442.1387527            | -441.956597                               | -441.945143                              | -441.992564       |
| 2                           |                | NH <sub>2</sub> | -458.1793179            | -458.00832                                | -457.99711                               | -458.043611       |
| 3                           |                | OH              | -478.0377382            | -477.879296                               | -477.868407                              | -477.914396       |
| 4                           |                | F               | -502.0530948            | -501.907201                               | -501.896607                              | -501.942178       |
| 5                           |                | CHO             | -516.1266091            | -515.962656                               | -515.950927                              | -515.999202       |
| 6                           |                | CN              | -495.0541933            | -494.901271                               | -494.889715                              | -494.937591       |
| 7                           |                | NO <sub>2</sub> | -607.2676781            | -607.110379                               | -607.098177                              | -607.148056       |

| Octatetraene [Starting Material], (Hartree) |                 |                 |                         |                                           |                                          |                   |
|---------------------------------------------|-----------------|-----------------|-------------------------|-------------------------------------------|------------------------------------------|-------------------|
| Entry                                       | R <sub>1</sub>  | R <sub>2</sub>  | Total Electronic Energy | Sum of Electronic and Zero-Point Energies | Sum of Electronic and Thermal Enthalpies | Gibbs Free Energy |
| 1                                           | NO <sub>2</sub> | CH <sub>3</sub> | -554.3742134            | -554.188942                               | -554.175214                              | -554.229802       |
| 2                                           |                 | NH <sub>2</sub> | -570.4100398            | -570.235972                               | -570.222432                              | -570.276519       |
| 3                                           |                 | OH              | -590.2690416            | -590.107125                               | -590.094022                              | -590.146927       |
| 4                                           |                 | F               | -614.2824354            | -614.133206                               | -614.120346                              | -614.173124       |

|   |  |                 |              |             |             |             |
|---|--|-----------------|--------------|-------------|-------------|-------------|
| 5 |  | CHO             | -628.3605982 | -628.193496 | -628.1795   | -628.234822 |
| 6 |  | CN              | -607.2890622 | -607.132643 | -607.118945 | -607.173511 |
| 7 |  | NO <sub>2</sub> | -719.50851   | -719.347775 | -719.333363 | -719.389842 |

| Transition State, (Hartree) |                 |                 |                         |                                           |                                          |                   |
|-----------------------------|-----------------|-----------------|-------------------------|-------------------------------------------|------------------------------------------|-------------------|
| Entry                       | R <sub>1</sub>  | R <sub>2</sub>  | Total Electronic Energy | Sum of Electronic and Zero-Point Energies | Sum of Electronic and Thermal Enthalpies | Gibbs Free Energy |
| 1                           | NO <sub>2</sub> | CH <sub>3</sub> | -554.3511949            | -554.164299                               | -554.152407                              | -554.201355       |
| 2                           |                 | NH <sub>2</sub> | -570.3938794            | -570.21847                                | -570.206647                              | -570.255382       |
| 3                           |                 | OH              | -590.2468249            | -590.08416                                | -590.072511                              | -590.12086        |
| 4                           |                 | F               | -614.2640731            | -614.113299                               | -614.102126                              | -614.149606       |
| 5                           |                 | CHO             | -628.3407512            | -628.172114                               | -628.159837                              | -628.210043       |
| 6                           |                 | CN              | -607.2672027            | -607.109773                               | -607.097612                              | -607.147507       |
| 7                           |                 | NO <sub>2</sub> | -719.4829198            | -719.320929                               | -719.30818                               | -719.359544       |

4.9 2,4-substituted

| Octatetraene [Starting Material], (Hartree) |                 |                 |                         |                                           |                                          |                   |
|---------------------------------------------|-----------------|-----------------|-------------------------|-------------------------------------------|------------------------------------------|-------------------|
| Entry                                       | R <sub>1</sub>  | R <sub>2</sub>  | Total Electronic Energy | Sum of Electronic and Zero-Point Energies | Sum of Electronic and Thermal Enthalpies | Gibbs Free Energy |
| 1                                           | CH <sub>3</sub> | CH <sub>3</sub> | -389.2321629            | -389.020372                               | -389.008074                              | -389.058241       |
| 2                                           |                 | NH <sub>2</sub> | -405.2753359            | -405.074894                               | -405.062814                              | -405.112213       |
| 3                                           |                 | OH              | -425.1364215            | -424.948746                               | -424.936851                              | -424.985894       |
| 4                                           |                 | F               | -449.1539935            | -448.978494                               | -448.966826                              | -449.016076       |
| 5                                           |                 | CHO             | -463.2250783            | -463.032562                               | -463.019709                              | -463.071198       |
| 6                                           |                 | CN              | -442.1556937            | -441.973814                               | -441.961129                              | -442.012633       |
| 7                                           |                 | NO <sub>2</sub> | -554.3710699            | -554.185672                               | -554.172137                              | -554.227707       |

| Transition State, (Hartree) |                 |                 |                         |                                           |                                          |                   |
|-----------------------------|-----------------|-----------------|-------------------------|-------------------------------------------|------------------------------------------|-------------------|
| Entry                       | R <sub>1</sub>  | R <sub>2</sub>  | Total Electronic Energy | Sum of Electronic and Zero-Point Energies | Sum of Electronic and Thermal Enthalpies | Gibbs Free Energy |
| 1                           | CH <sub>3</sub> | CH <sub>3</sub> | -389.2136652            | -389.002044                               | -388.990797                              | -389.037235       |
| 2                           |                 | NH <sub>2</sub> | -405.2540164            | -405.053699                               | -405.0435                                | -405.087428       |
| 3                           |                 | OH              | -425.1166587            | -424.928733                               | -424.918026                              | -424.963224       |
| 4                           |                 | F               | -449.1363775            | -448.961133                               | -448.950732                              | -448.995447       |
| 5                           |                 | CHO             | -463.2094603            | -463.015922                               | -463.004441                              | -463.051741       |
| 6                           |                 | CN              | -442.1380985            | -441.955769                               | -441.944408                              | -441.991394       |
| 7                           |                 | NO <sub>2</sub> | -554.3555395            | -554.168983                               | -554.156887                              | -554.206248       |

| Octatetraene [Starting Material], (Hartree) |                 |                 |                         |                                           |                                          |                   |
|---------------------------------------------|-----------------|-----------------|-------------------------|-------------------------------------------|------------------------------------------|-------------------|
| Entry                                       | R <sub>1</sub>  | R <sub>2</sub>  | Total Electronic Energy | Sum of Electronic and Zero-Point Energies | Sum of Electronic and Thermal Enthalpies | Gibbs Free Energy |
| 1                                           | NH <sub>2</sub> | CH <sub>3</sub> | -405.2745509            | -405.074083                               | -405.0619                                | -405.111627       |
| 2                                           |                 | NH <sub>2</sub> | -421.317702             | -421.12835                                | -421.116443                              | -421.16523        |
| 3                                           |                 | OH              | -441.1783481            | -441.002159                               | -440.990343                              | -441.03899        |
| 4                                           |                 | F               | -465.1951703            | -465.031215                               | -465.01973                               | -465.067789       |
| 5                                           |                 | CHO             | -479.2664126            | -479.084719                               | -479.072151                              | -479.122652       |
| 6                                           |                 | CN              | -458.1970158            | -458.026431                               | -458.013901                              | -458.064932       |
| 7                                           |                 | NO <sub>2</sub> | -570.4119302            | -570.237402                               | -570.224151                              | -570.277454       |

| Transition State, (Hartree) |                |                |                         |                                           |                                          |                   |
|-----------------------------|----------------|----------------|-------------------------|-------------------------------------------|------------------------------------------|-------------------|
| Entry                       | R <sub>1</sub> | R <sub>2</sub> | Total Electronic Energy | Sum of Electronic and Zero-Point Energies | Sum of Electronic and Thermal Enthalpies | Gibbs Free Energy |



|   |                 |                 |              |             |             |             |
|---|-----------------|-----------------|--------------|-------------|-------------|-------------|
| 1 | NH <sub>2</sub> | CH <sub>3</sub> | -405.253357  | -405.052867 | -405.041891 | -405.087417 |
| 2 |                 | NH <sub>2</sub> | -421.2937623 | -421.104138 | -421.093467 | -421.138205 |
| 3 |                 | OH              | -441.1566106 | -440.979743 | -440.969321 | -441.013638 |
| 4 |                 | F               | -465.1759551 | -465.011821 | -465.001607 | -465.045777 |
| 5 |                 | CHO             | -479.2483437 | -479.065963 | -479.054701 | -479.101411 |
| 6 |                 | CN              | -458.1770482 | -458.00613  | -457.99487  | -458.041529 |
| 7 |                 | NO <sub>2</sub> | -570.39418   | -570.218956 | -570.207084 | -570.255733 |

| Octatetraene [Starting Material], (Hartree) |                |                 |                         |                                           |                                          |                   |
|---------------------------------------------|----------------|-----------------|-------------------------|-------------------------------------------|------------------------------------------|-------------------|
| Entry                                       | R <sub>1</sub> | R <sub>2</sub>  | Total Electronic Energy | Sum of Electronic and Zero-Point Energies | Sum of Electronic and Thermal Enthalpies | Gibbs Free Energy |
| 1                                           | OH             | CH <sub>3</sub> | -425.136544             | -424.948509                               | -424.936467                              | -424.986313       |
| 2                                           |                | NH <sub>2</sub> | -441.1799468            | -441.00378                                | -440.991896                              | -441.040835       |
| 3                                           |                | OH              | -461.041068             | -460.8774                                 | -460.865777                              | -460.914308       |
| 4                                           |                | F               | -485.0584672            | -484.907359                               | -484.895817                              | -484.945164       |
| 5                                           |                | CHO             | -499.1258816            | -498.95725                                | -498.944788                              | -498.9954         |
| 6                                           |                | CN              | -478.0585248            | -477.900587                               | -477.888995                              | -477.937192       |
| 7                                           |                | NO <sub>2</sub> | -590.2723021            | -590.110283                               | -590.0973                                | -590.149895       |

| Transition State, (Hartree) |                |                 |                         |                                           |                                          |                   |
|-----------------------------|----------------|-----------------|-------------------------|-------------------------------------------|------------------------------------------|-------------------|
| Entry                       | R <sub>1</sub> | R <sub>2</sub>  | Total Electronic Energy | Sum of Electronic and Zero-Point Energies | Sum of Electronic and Thermal Enthalpies | Gibbs Free Energy |
| 1                           | OH             | CH <sub>3</sub> | -425.1154204            | -424.927432                               | -424.916752                              | -424.961936       |
| 2                           |                | NH <sub>2</sub> | -441.1565189            | -440.979566                               | -440.969184                              | -441.013442       |
| 3                           |                | OH              | -461.0183089            | -460.853909                               | -460.843817                              | -460.887562       |
| 4                           |                | F               | -485.0372026            | -484.885437                               | -484.875574                              | -484.919066       |
| 5                           |                | CHO             | -499.108539             | -498.939161                               | -498.928034                              | -498.974579       |
| 6                           |                | CN              | -478.2495747            | -478.092676                               | -478.08171                               | -478.127863       |
| 7                           |                | NO <sub>2</sub> | -590.5083601            | -590.347589                               | -590.335849                              | -590.384967       |

| Octatetraene [Starting Material], (Hartree) |                |                 |                         |                                           |                                          |                   |
|---------------------------------------------|----------------|-----------------|-------------------------|-------------------------------------------|------------------------------------------|-------------------|
| Entry                                       | R <sub>1</sub> | R <sub>2</sub>  | Total Electronic Energy | Sum of Electronic and Zero-Point Energies | Sum of Electronic and Thermal Enthalpies | Gibbs Free Energy |
| 1                                           | F              | CH <sub>3</sub> | -449.1522121            | -448.977165                               | -448.966255                              | -449.012953       |
| 2                                           |                | NH <sub>2</sub> | -465.1960202            | -465.032206                               | -465.020666                              | -465.069178       |
| 3                                           |                | OH              | -485.0565892            | -484.905481                               | -484.894154                              | -484.942275       |
| 4                                           |                | F               | -509.0730209            | -508.934464                               | -508.924135                              | -508.969802       |
| 5                                           |                | CHO             | -523.14038              | -522.984291                               | -522.972038                              | -523.022633       |
| 6                                           |                | CN              | -502.0725203            | -501.927131                               | -501.915825                              | -501.963991       |
| 7                                           |                | NO <sub>2</sub> | -614.2861426            | -614.13676                                | -614.124031                              | -614.176182       |

| Transition State, (Hartree) |                |                 |                         |                                           |                                          |                   |
|-----------------------------|----------------|-----------------|-------------------------|-------------------------------------------|------------------------------------------|-------------------|
| Entry                       | R <sub>1</sub> | R <sub>2</sub>  | Total Electronic Energy | Sum of Electronic and Zero-Point Energies | Sum of Electronic and Thermal Enthalpies | Gibbs Free Energy |
| 1                           | F              | CH <sub>3</sub> | -449.1321609            | -448.956831                               | -448.946424                              | -448.991149       |
| 2                           |                | NH <sub>2</sub> | -465.173227             | -465.008686                               | -464.998649                              | -465.04238        |
| 3                           |                | OH              | -485.0346944            | -484.883043                               | -484.873172                              | -484.916689       |
| 4                           |                | F               | -509.0528934            | -508.913794                               | -508.904221                              | -508.947346       |
| 5                           |                | CHO             | -523.1254822            | -522.968309                               | -522.957632                              | -523.003416       |
| 6                           |                | CN              | -502.0530788            | -501.907156                               | -501.896581                              | -501.942114       |
| 7                           |                | NO <sub>2</sub> | -614.2702924            | -614.119928                               | -614.108663                              | -614.156486       |

| Octatetraene [Starting Material], (Hartree) |                |                |                         |                                  |                               |                   |
|---------------------------------------------|----------------|----------------|-------------------------|----------------------------------|-------------------------------|-------------------|
| Entry                                       | R <sub>1</sub> | R <sub>2</sub> | Total Electronic Energy | Sum of Electronic and Zero-Point | Sum of Electronic and Thermal | Gibbs Free Energy |

|   |     |                 |              | Energies    | Enthalpies  |             |
|---|-----|-----------------|--------------|-------------|-------------|-------------|
| 1 | CHO | CH <sub>3</sub> | -463.2205283 | -463.027921 | -463.015048 | -463.06687  |
| 2 |     | NH <sub>2</sub> | -479.2637675 | -479.082327 | -479.069711 | -479.120669 |
| 3 |     | OH              | -499.1235452 | -498.955038 | -498.94252  | -498.993487 |
| 4 |     | F               | -523.1393165 | -522.982817 | -522.97064  | -523.021006 |
| 5 |     | CHO             | -537.2089437 | -537.035084 | -537.021762 | -537.074913 |
| 6 |     | CN              | -516.1403559 | -515.977438 | -515.964216 | -516.017315 |
| 7 |     | NO <sub>2</sub> | -628.3542111 | -628.187347 | -628.173366 | -628.22912  |

| Transition State, (Hartree) |                |                 |                         |                                           |                                          |                   |
|-----------------------------|----------------|-----------------|-------------------------|-------------------------------------------|------------------------------------------|-------------------|
| Entry                       | R <sub>1</sub> | R <sub>2</sub>  | Total Electronic Energy | Sum of Electronic and Zero-Point Energies | Sum of Electronic and Thermal Enthalpies | Gibbs Free Energy |
| 1                           | CHO            | CH <sub>3</sub> | -463.2061496            | -463.012832                               | -463.001312                              | -463.048694       |
| 2                           |                | NH <sub>2</sub> | -479.2462167            | -479.063797                               | -479.052577                              | -479.099203       |
| 3                           |                | OH              | -499.1079077            | -498.938501                               | -498.927422                              | -498.973867       |
| 4                           |                | F               | -523.1265923            | -522.969941                               | -522.959135                              | -523.005264       |
| 5                           |                | CHO             | -537.2006919            | -537.025307                               | -537.01353                               | -537.061939       |
| 6                           |                | CN              | -516.1274087            | -515.963758                               | -515.951946                              | -516.000482       |
| 7                           |                | NO <sub>2</sub> | -628.345073             | -628.17712                                | -628.16458                               | -628.215562       |

| Octatetraene [Starting Material], (Hartree) |                |                 |                         |                                           |                                          |                   |
|---------------------------------------------|----------------|-----------------|-------------------------|-------------------------------------------|------------------------------------------|-------------------|
| Entry                                       | R <sub>1</sub> | R <sub>2</sub>  | Total Electronic Energy | Sum of Electronic and Zero-Point Energies | Sum of Electronic and Thermal Enthalpies | Gibbs Free Energy |
| 1                                           | CN             | CH <sub>3</sub> | -442.1528398            | -441.970887                               | -441.958216                              | -442.009905       |
| 2                                           |                | NH <sub>2</sub> | -458.1975529            | -458.1975529                              | -458.014159                              | -458.064834       |
| 3                                           |                | OH              | -478.0578464            | -477.899667                               | -477.88744                               | -477.937951       |
| 4                                           |                | F               | -502.0731231            | -501.927649                               | -501.915533                              | -501.966546       |
| 5                                           |                | CHO             | -516.1407068            | -515.977799                               | -515.964637                              | -516.017366       |
| 6                                           |                | CN              | -495.0720452            | -494.919669                               | -494.906679                              | -494.959471       |
| 7                                           |                | NO <sub>2</sub> | -607.2862211            | -607.130149                               | -607.116405                              | -607.171378       |

| Transition State, (Hartree) |                |                 |                         |                                           |                                          |                   |
|-----------------------------|----------------|-----------------|-------------------------|-------------------------------------------|------------------------------------------|-------------------|
| Entry                       | R <sub>1</sub> | R <sub>2</sub>  | Total Electronic Energy | Sum of Electronic and Zero-Point Energies | Sum of Electronic and Thermal Enthalpies | Gibbs Free Energy |
| 1                           | CN             | CH <sub>3</sub> | -442.1366393            | -441.954139                               | -441.942818                              | -441.989777       |
| 2                           |                | NH <sub>2</sub> | -458.1771946            | -458.005578                               | -457.994604                              | -458.040636       |
| 3                           |                | OH              | -478.0379888            | -477.879271                               | -477.868463                              | -477.914255       |
| 4                           |                | F               | -502.056166             | -501.910234                               | -501.899684                              | -501.945198       |
| 5                           |                | CHO             | -516.129365             | -515.965299                               | -515.953648                              | -516.001803       |
| 6                           |                | CN              | -495.0559009            | -494.902973                               | -494.891432                              | -494.939318       |
| 7                           |                | NO <sub>2</sub> | -607.2729118            | -607.115609                               | -607.103352                              | -607.153621       |

| Octatetraene [Starting Material], (Hartree) |                 |                 |                         |                                           |                                          |                   |
|---------------------------------------------|-----------------|-----------------|-------------------------|-------------------------------------------|------------------------------------------|-------------------|
| Entry                                       | R <sub>1</sub>  | R <sub>2</sub>  | Total Electronic Energy | Sum of Electronic and Zero-Point Energies | Sum of Electronic and Thermal Enthalpies | Gibbs Free Energy |
| 1                                           | NO <sub>2</sub> | CH <sub>3</sub> | -554.3718312            | -554.185707                               | -554.172401                              | -554.225773       |
| 2                                           |                 | NH <sub>2</sub> | -570.4129283            | -570.238645                               | -570.225401                              | -570.277246       |
| 3                                           |                 | OH              | -590.2726577            | -590.110837                               | -590.097864                              | -590.149407       |
| 4                                           |                 | F               | -614.285565             | -614.136019                               | -614.123244                              | -614.176065       |
| 5                                           |                 | CHO             | -628.3525475            | -628.185571                               | -628.171652                              | -628.226798       |
| 6                                           |                 | CN              | -607.2860545            | -607.130108                               | -607.116484                              | -607.170011       |
| 7                                           |                 | NO <sub>2</sub> | -719.5034278            | -719.342885                               | -719.328597                              | -719.384222       |

| Transition State, (Hartree) |                |                |                  |                   |                   |                   |
|-----------------------------|----------------|----------------|------------------|-------------------|-------------------|-------------------|
| Entry                       | R <sub>1</sub> | R <sub>2</sub> | Total Electronic | Sum of Electronic | Sum of Electronic | Gibbs Free Energy |

|   |                 |                 | Energy       | and Zero-Point Energies | and Thermal Enthalpies |             |
|---|-----------------|-----------------|--------------|-------------------------|------------------------|-------------|
| 1 | NO <sub>2</sub> | CH <sub>3</sub> | -554.3558261 | -554.168748             | -554.156779            | -554.205882 |
| 2 |                 | NH <sub>2</sub> | -570.3966187 | -570.220389             | -570.208774            | -570.256967 |
| 3 |                 | OH              | -590.256647  | -590.093434             | -590.08195             | -590.130067 |
| 4 |                 | F               | -614.274788  | -614.124396             | -614.113177            | -614.161012 |
| 5 |                 | CHO             | -628.3483422 | -628.179643             | -628.167311            | -628.217726 |
| 6 |                 | CN              | -607.2742674 | -607.116869             | -607.104626            | -607.154869 |
| 7 |                 | NO <sub>2</sub> | -719.4909427 | -719.329373             | -719.316377            | -719.369637 |

#### 4.10 2,5-substituted

| Octatetraene [Starting Material], (Hartree) |                 |                 |                         |                                           |                                          |                   |
|---------------------------------------------|-----------------|-----------------|-------------------------|-------------------------------------------|------------------------------------------|-------------------|
| Entry                                       | R <sub>1</sub>  | R <sub>2</sub>  | Total Electronic Energy | Sum of Electronic and Zero-Point Energies | Sum of Electronic and Thermal Enthalpies | Gibbs Free Energy |
| 1                                           | CH <sub>3</sub> | CH <sub>3</sub> | -389.2367219            | -389.026055                               | -389.01364                               | -389.063191       |
| 2                                           |                 | NH <sub>2</sub> | -405.2755608            | -405.07585                                | -405.06354                               | -405.113482       |
| 3                                           |                 | OH              | -425.1350504            | -424.947968                               | -424.935753                              | -424.986383       |
| 4                                           |                 | F               | -449.1510415            | -448.976125                               | -448.964407                              | -449.01341        |
| 5                                           |                 | CHO             | -463.2242289            | -463.031923                               | -463.018942                              | -463.071197       |
| 6                                           |                 | CN              | -442.1548053            | -441.973293                               | -441.960513                              | -442.012717       |
| 7                                           |                 | NO <sub>2</sub> | -554.3751312            | -554.188827                               | -554.175594                              | -554.175594       |

| Transition State, (Hartree) |                 |                 |                         |                                           |                                          |                   |
|-----------------------------|-----------------|-----------------|-------------------------|-------------------------------------------|------------------------------------------|-------------------|
| Entry                       | R <sub>1</sub>  | R <sub>2</sub>  | Total Electronic Energy | Sum of Electronic and Zero-Point Energies | Sum of Electronic and Thermal Enthalpies | Gibbs Free Energy |
| 1                           | CH <sub>3</sub> | CH <sub>3</sub> | -389.2135529            | -389.0024                                 | -388.991003                              | -389.038104       |
| 2                           |                 | NH <sub>2</sub> | -405.25344              | -405.052808                               | -405.041822                              | -405.087664       |
| 3                           |                 | OH              | -425.1164102            | -424.928789                               | -424.917976                              | -424.96362        |
| 4                           |                 | F               | -449.1360084            | -448.960985                               | -448.950468                              | -448.995724       |
| 5                           |                 | CHO             | -463.2087776            | -463.015736                               | -463.004052                              | -463.052198       |
| 6                           |                 | CN              | -442.1384317            | -441.956197                               | -441.944729                              | -441.99226        |
| 7                           |                 | NO <sub>2</sub> | -554.3560483            | -554.169485                               | -554.157323                              | -554.207359       |

| Octatetraene [Starting Material], (Hartree) |                 |                 |                         |                                           |                                          |                   |
|---------------------------------------------|-----------------|-----------------|-------------------------|-------------------------------------------|------------------------------------------|-------------------|
| Entry                                       | R <sub>1</sub>  | R <sub>2</sub>  | Total Electronic Energy | Sum of Electronic and Zero-Point Energies | Sum of Electronic and Thermal Enthalpies | Gibbs Free Energy |
| 1                                           | NH <sub>2</sub> | CH <sub>3</sub> | -405.2766556            | -405.077104                               | -405.064779                              | -405.114526       |
| 2                                           |                 | NH <sub>2</sub> | -421.316369             | -421.127009                               | -421.11501                               | -421.164092       |
| 3                                           |                 | OH              | -441.1769128            | -440.999959                               | -440.988357                              | -441.036623       |
| 4                                           |                 | F               | -465.191344             | -465.027393                               | -465.015823                              | -465.064844       |
| 5                                           |                 | CHO             | -479.2684444            | -479.086608                               | -479.074146                              | -479.12428        |
| 6                                           |                 | CN              | -458.1945885            | -458.02393                                | -458.011453                              | -458.062193       |
| 7                                           |                 | NO <sub>2</sub> | -570.4135075            | -570.238602                               | -570.225456                              | -570.278262       |

| Transition State, (Hartree) |                 |                 |                         |                                           |                                          |                   |
|-----------------------------|-----------------|-----------------|-------------------------|-------------------------------------------|------------------------------------------|-------------------|
| Entry                       | R <sub>1</sub>  | R <sub>2</sub>  | Total Electronic Energy | Sum of Electronic and Zero-Point Energies | Sum of Electronic and Thermal Enthalpies | Gibbs Free Energy |
| 1                           | NH <sub>2</sub> | CH <sub>3</sub> | -405.2528088            | -405.052617                               | -405.041606                              | -405.087333       |
| 2                           |                 | NH <sub>2</sub> | -421.2916653            | -421.2916653                              | -421.091476                              | -421.136244       |
| 3                           |                 | OH              | -441.1548292            | -440.978311                               | -440.967822                              | -441.012328       |
| 4                           |                 | F               | -465.1749284            | -465.011002                               | -465.000803                              | -465.044951       |
| 5                           |                 | CHO             | -479.2487811            | -479.06682                                | -479.055397                              | -479.102494       |
| 6                           |                 | CN              | -458.1786268            | -458.007625                               | -457.99638                               | -458.043059       |

|   |  |                 |              |             |             |             |
|---|--|-----------------|--------------|-------------|-------------|-------------|
| 7 |  | NO <sub>2</sub> | -570.3965982 | -570.221314 | -570.209373 | -570.258364 |
|---|--|-----------------|--------------|-------------|-------------|-------------|

| Octatetraene [Starting Material], (Hartree) |                |                 |                         |                                           |                                          |                   |
|---------------------------------------------|----------------|-----------------|-------------------------|-------------------------------------------|------------------------------------------|-------------------|
| Entry                                       | R <sub>1</sub> | R <sub>2</sub>  | Total Electronic Energy | Sum of Electronic and Zero-Point Energies | Sum of Electronic and Thermal Enthalpies | Gibbs Free Energy |
| 1                                           | OH             | CH <sub>3</sub> | -425.1360654            | -424.949036                               | -424.936887                              | -424.986471       |
| 2                                           |                | NH <sub>2</sub> | -441.176742             | -441.000281                               | -440.988475                              | -441.037612       |
| 3                                           |                | OH              | -461.0352351            | -460.871867                               | -460.860168                              | -460.908832       |
| 4                                           |                | F               | -485.0516688            | -484.900832                               | -484.889437                              | -484.937563       |
| 5                                           |                | CHO             | -499.129142             | -498.960326                               | -498.947958                              | -498.99833        |
| 6                                           |                | CN              | -478.0582089            | -477.900591                               | -477.888277                              | -477.938563       |
| 7                                           |                | NO <sub>2</sub> | -590.2766401            | -590.114506                               | -590.101615                              | -590.153197       |

| Transition State, (Hartree) |                |                 |                         |                                           |                                          |                   |
|-----------------------------|----------------|-----------------|-------------------------|-------------------------------------------|------------------------------------------|-------------------|
| Entry                       | R <sub>1</sub> | R <sub>2</sub>  | Total Electronic Energy | Sum of Electronic and Zero-Point Energies | Sum of Electronic and Thermal Enthalpies | Gibbs Free Energy |
| 1                           | OH             | CH <sub>3</sub> | -425.1145674            | -424.92683                                | -424.916075                              | -424.961459       |
| 2                           |                | NH <sub>2</sub> | -441.15257              | -440.975914                               | -440.96541                               | -441.009908       |
| 3                           |                | OH              | -461.016576             | -460.85266                                | -460.842427                              | -460.886484       |
| 4                           |                | F               | -485.036361             | -484.885125                               | -484.875183                              | -484.918877       |
| 5                           |                | CHO             | -499.1103091            | -498.940792                               | -498.929749                              | -498.976146       |
| 6                           |                | CN              | -478.039556             | -477.880889                               | -477.870042                              | -477.916          |
| 7                           |                | NO <sub>2</sub> | -590.2573007            | -590.094277                               | -590.082773                              | -590.130997       |

| Octatetraene [Starting Material], (Hartree) |                |                 |                         |                                           |                                          |                   |
|---------------------------------------------|----------------|-----------------|-------------------------|-------------------------------------------|------------------------------------------|-------------------|
| Entry                                       | R <sub>1</sub> | R <sub>2</sub>  | Total Electronic Energy | Sum of Electronic and Zero-Point Energies | Sum of Electronic and Thermal Enthalpies | Gibbs Free Energy |
| 1                                           | F              | CH <sub>3</sub> | -449.1509469            | -448.976252                               | -448.964428                              | -449.013696       |
| 2                                           |                | NH <sub>2</sub> | -465.1912501            | -465.027603                               | -465.015986                              | -465.064769       |
| 3                                           |                | OH              | -485.0517462            | -484.900836                               | -484.889487                              | -484.937573       |
| 4                                           |                | F               | -509.0672222            | -508.928611                               | -508.917558                              | -508.965219       |
| 5                                           |                | CHO             | -523.1426253            | -522.986295                               | -522.974199                              | -523.024146       |
| 6                                           |                | CN              | -502.0713907            | -501.926244                               | -501.91418                               | -501.964293       |
| 7                                           |                | NO <sub>2</sub> | -614.2893831            | -614.139922                               | -614.127255                              | -614.178843       |

| Transition State, (Hartree) |                |                 |                         |                                           |                                          |                   |
|-----------------------------|----------------|-----------------|-------------------------|-------------------------------------------|------------------------------------------|-------------------|
| Entry                       | R <sub>1</sub> | R <sub>2</sub>  | Total Electronic Energy | Sum of Electronic and Zero-Point Energies | Sum of Electronic and Thermal Enthalpies | Gibbs Free Energy |
| 1                           | F              | CH <sub>3</sub> | -449.131287             | -448.956067                               | -448.945571                              | -448.990731       |
| 2                           |                | NH <sub>2</sub> | -465.170854             | -465.006346                               | -464.996276                              | -465.040095       |
| 3                           |                | OH              | -485.0334083            | -484.881908                               | -484.872014                              | -484.915566       |
| 4                           |                | F               | -509.0525073            | -508.91364                                | -508.904068                              | -508.947175       |
| 5                           |                | CHO             | -523.1257369            | -522.968785                               | -522.958024                              | -523.004026       |
| 6                           |                | CN              | -502.0545506            | -501.908366                               | -501.897822                              | -501.943319       |
| 7                           |                | NO <sub>2</sub> | -614.2721526            | -614.121659                               | -614.110423                              | -614.158338       |

| Octatetraene [Starting Material], (Hartree) |                |                 |                         |                                           |                                          |                   |
|---------------------------------------------|----------------|-----------------|-------------------------|-------------------------------------------|------------------------------------------|-------------------|
| Entry                                       | R <sub>1</sub> | R <sub>2</sub>  | Total Electronic Energy | Sum of Electronic and Zero-Point Energies | Sum of Electronic and Thermal Enthalpies | Gibbs Free Energy |
| 1                                           | CHO            | CH <sub>3</sub> | -463.220493             | -463.028677                               | -463.01555                               | -463.068083       |
| 2                                           |                | NH <sub>2</sub> | -479.265698             | -479.083955                               | -479.071508                              | -479.121709       |
| 3                                           |                | OH              | -499.1252316            | -498.956347                               | -498.943995                              | -498.994327       |
| 4                                           |                | F               | -523.138752             | -522.982457                               | -522.970327                              | -523.020434       |
| 5                                           |                | CHO             | -537.2092264            | -537.035579                               | -537.022196                              | -537.075501       |

|   |  |                 |              |             |             |             |
|---|--|-----------------|--------------|-------------|-------------|-------------|
| 6 |  | CN              | -516.1404016 | -515.977506 | -515.964345 | -516.016903 |
| 7 |  | NO <sub>2</sub> | -628.3551348 | -628.187692 | -628.173948 | -628.228374 |

| Transition State, (Hartree) |                |                 |                         |                                           |                                          |                   |
|-----------------------------|----------------|-----------------|-------------------------|-------------------------------------------|------------------------------------------|-------------------|
| Entry                       | R <sub>1</sub> | R <sub>2</sub>  | Total Electronic Energy | Sum of Electronic and Zero-Point Energies | Sum of Electronic and Thermal Enthalpies | Gibbs Free Energy |
| 1                           | CHO            | CH <sub>3</sub> | -463.2068606            | -463.013424                               | -463.001931                              | -463.049286       |
| 2                           |                | NH <sub>2</sub> | -479.2475803            | -479.065407                               | -479.054108                              | -479.100797       |
| 3                           |                | OH              | -499.109999             | -498.940224                               | -498.929251                              | -498.975461       |
| 4                           |                | F               | -523.1278829            | -522.970669                               | -522.960007                              | -523.005766       |
| 5                           |                | CHO             | -537.1989298            | -537.023909                               | -537.012044                              | -537.060755       |
| 6                           |                | CN              | -516.1277671            | -515.963865                               | -515.952177                              | -516.000409       |
| 7                           |                | NO <sub>2</sub> | -628.3446567            | -628.176438                               | -628.164034                              | -628.214773       |

| Octatetraene [Starting Material], (Hartree) |                |                 |                         |                                           |                                          |                   |
|---------------------------------------------|----------------|-----------------|-------------------------|-------------------------------------------|------------------------------------------|-------------------|
| Entry                                       | R <sub>1</sub> | R <sub>2</sub>  | Total Electronic Energy | Sum of Electronic and Zero-Point Energies | Sum of Electronic and Thermal Enthalpies | Gibbs Free Energy |
| 1                                           | CN             | CH <sub>3</sub> | -442.1557912            | -441.974867                               | -441.962008                              | -442.013238       |
| 2                                           |                | NH <sub>2</sub> | -458.1927466            | -458.022759                               | -458.01018                               | -458.060997       |
| 3                                           |                | OH              | -478.0557585            | -477.898141                               | -477.885802                              | -477.936016       |
| 4                                           |                | F               | -502.0684421            | -501.923551                               | -501.911462                              | -501.961741       |
| 5                                           |                | CHO             | -516.1419908            | -515.978762                               | -515.965685                              | -516.01798        |
| 6                                           |                | CN              | -495.071905             | -494.920149                               | -494.90714                               | -494.959428       |
| 7                                           |                | NO <sub>2</sub> | -607.2897077            | -607.133747                               | -607.120066                              | -607.174133       |

| Transition State, (Hartree) |                |                 |                         |                                           |                                          |                   |
|-----------------------------|----------------|-----------------|-------------------------|-------------------------------------------|------------------------------------------|-------------------|
| Entry                       | R <sub>1</sub> | R <sub>2</sub>  | Total Electronic Energy | Sum of Electronic and Zero-Point Energies | Sum of Electronic and Thermal Enthalpies | Gibbs Free Energy |
| 1                           | CN             | CH <sub>3</sub> | -442.1366816            | -441.954207                               | -441.942886                              | -441.98985        |
| 2                           |                | NH <sub>2</sub> | -458.1778861            | -458.006301                               | -457.995282                              | -458.041432       |
| 3                           |                | OH              | -478.0393975            | -477.880695                               | -477.869846                              | -477.91578        |
| 4                           |                | F               | -502.0569993            | -501.910869                               | -501.900335                              | -501.945829       |
| 5                           |                | CHO             | -516.1282226            | -515.964356                               | -515.952615                              | -516.001069       |
| 6                           |                | CN              | -495.0567822            | -494.903844                               | -494.892299                              | -494.940233       |
| 7                           |                | NO <sub>2</sub> | -607.273967             | -607.116564                               | -607.104355                              | -607.154503       |

| Octatetraene [Starting Material], (Hartree) |                 |                 |                         |                                           |                                          |                   |
|---------------------------------------------|-----------------|-----------------|-------------------------|-------------------------------------------|------------------------------------------|-------------------|
| Entry                                       | R <sub>1</sub>  | R <sub>2</sub>  | Total Electronic Energy | Sum of Electronic and Zero-Point Energies | Sum of Electronic and Thermal Enthalpies | Gibbs Free Energy |
| 1                                           | NO <sub>2</sub> | CH <sub>3</sub> | -554.3679416            | -554.182068                               | -554.168755                              | -554.22162        |
| 2                                           |                 | NH <sub>2</sub> | -570.6611418            | -570.488396                               | -570.475226                              | -570.527903       |
| 3                                           |                 | OH              | -590.2734254            | -590.111355                               | -590.098495                              | -590.150068       |
| 4                                           |                 | F               | -614.2861657            | -614.13661                                | -614.123999                              | -614.175493       |
| 5                                           |                 | CHO             | -628.3549426            | -628.187519                               | -628.173743                              | -628.173743       |
| 6                                           |                 | CN              | -607.2882734            | -607.132081                               | -607.118438                              | -607.17265        |
| 7                                           |                 | NO <sub>2</sub> | -719.7949706            | -719.636609                               | -719.622321                              | -719.677958       |

| Transition State, (Hartree) |                 |                 |                         |                                           |                                          |                   |
|-----------------------------|-----------------|-----------------|-------------------------|-------------------------------------------|------------------------------------------|-------------------|
| Entry                       | R <sub>1</sub>  | R <sub>2</sub>  | Total Electronic Energy | Sum of Electronic and Zero-Point Energies | Sum of Electronic and Thermal Enthalpies | Gibbs Free Energy |
| 1                           | NO <sub>2</sub> | CH <sub>3</sub> | -554.3557458            | -554.168944                               | -554.156944                              | -554.206156       |
| 2                           |                 | NH <sub>2</sub> | -570.650087             | -570.476384                               | -570.464537                              | -570.513199       |
| 3                           |                 | OH              | -590.2584374            | -590.095422                               | -590.083887                              | -590.132179       |
| 4                           |                 | F               | -614.2756839            | -614.125313                               | -614.114051                              | -614.162016       |

|   |  |                 |              |             |             |             |
|---|--|-----------------|--------------|-------------|-------------|-------------|
| 5 |  | CHO             | -628.3466249 | -628.178544 | -628.16609  | -628.216944 |
| 6 |  | CN              | -607.2750458 | -607.117865 | -607.105627 | -607.155841 |
| 7 |  | NO <sub>2</sub> | -719.786951  | -719.627834 | -719.614752 | -719.667901 |

#### 4.11 2,6-substituted

| Octatetraene [Starting Material], (Hartree) |                 |                 |                         |                                           |                                          |                   |
|---------------------------------------------|-----------------|-----------------|-------------------------|-------------------------------------------|------------------------------------------|-------------------|
| Entry                                       | R <sub>1</sub>  | R <sub>2</sub>  | Total Electronic Energy | Sum of Electronic and Zero-Point Energies | Sum of Electronic and Thermal Enthalpies | Gibbs Free Energy |
| 1                                           | CH <sub>3</sub> | CH <sub>3</sub> | -389.238398             | -389.02677                                | -389.014398                              | -389.064884       |
| 2                                           |                 | NH <sub>2</sub> | -405.2782698            | -405.077708                               | -405.065585                              | -405.115154       |
| 3                                           |                 | OH              | -425.1383162            | -424.950581                               | -424.93863                               | -424.987994       |
| 4                                           |                 | F               | -449.1558274            | -448.980685                               | -448.96893                               | -449.018328       |
| 5                                           |                 | CHO             | -463.2251858            | -463.03194                                | -463.019131                              | -463.070875       |
| 6                                           |                 | CN              | -442.1599633            | -441.977924                               | -441.965228                              | -442.017446       |
| 7                                           |                 | NO <sub>2</sub> | -554.371987             | -554.185529                               | -554.172137                              | -554.226439       |

| Transition State, (Hartree) |                 |                 |                         |                                           |                                          |                   |
|-----------------------------|-----------------|-----------------|-------------------------|-------------------------------------------|------------------------------------------|-------------------|
| Entry                       | R <sub>1</sub>  | R <sub>2</sub>  | Total Electronic Energy | Sum of Electronic and Zero-Point Energies | Sum of Electronic and Thermal Enthalpies | Gibbs Free Energy |
| 1                           | CH <sub>3</sub> | CH <sub>3</sub> | -389.2154541            | -389.004102                               | -388.992718                              | -389.039772       |
| 2                           |                 | NH <sub>2</sub> | -405.2555169            | -405.055177                               | -405.044116                              | -405.090291       |
| 3                           |                 | OH              | -425.1172417            | -424.929749                               | -424.918872                              | -424.964558       |
| 4                           |                 | F               | -449.1358572            | -448.960601                               | -448.950138                              | -448.995222       |
| 5                           |                 | CHO             | -463.2091777            | -463.01604                                | -463.004402                              | -463.052287       |
| 6                           |                 | CN              | -442.1395336            | -441.957141                               | -441.945742                              | -441.992974       |
| 7                           |                 | NO <sub>2</sub> | -554.3575506            | -554.170693                               | -554.158586                              | -554.208551       |

| Octatetraene [Starting Material], (Hartree) |                 |                 |                         |                                           |                                          |                   |
|---------------------------------------------|-----------------|-----------------|-------------------------|-------------------------------------------|------------------------------------------|-------------------|
| Entry                                       | R <sub>1</sub>  | R <sub>2</sub>  | Total Electronic Energy | Sum of Electronic and Zero-Point Energies | Sum of Electronic and Thermal Enthalpies | Gibbs Free Energy |
| 1                                           | NH <sub>2</sub> | CH <sub>3</sub> | -405.2799182            | -405.079238                               | -405.067151                              | -405.116231       |
| 2                                           |                 | NH <sub>2</sub> | -421.3200398            | -421.130414                               | -421.118529                              | -421.167192       |
| 3                                           |                 | OH              | -441.1823659            | -441.005818                               | -440.994031                              | -441.042709       |
| 4                                           |                 | F               | -465.197095             | -465.033051                               | -465.021546                              | -465.069863       |
| 5                                           |                 | CHO             | -479.2650688            | -479.08339                                | -479.070635                              | -479.122218       |
| 6                                           |                 | CN              | -458.2010574            | -458.030024                               | -458.017605                              | -458.068047       |
| 7                                           |                 | NO <sub>2</sub> | -570.4127879            | -570.237332                               | -570.224166                              | -570.27717        |

| Transition State, (Hartree) |                 |                 |                         |                                           |                                          |                   |
|-----------------------------|-----------------|-----------------|-------------------------|-------------------------------------------|------------------------------------------|-------------------|
| Entry                       | R <sub>1</sub>  | R <sub>2</sub>  | Total Electronic Energy | Sum of Electronic and Zero-Point Energies | Sum of Electronic and Thermal Enthalpies | Gibbs Free Energy |
| 1                           | NH <sub>2</sub> | CH <sub>3</sub> | -405.2551347            | -405.054921                               | -405.04379                               | -405.089965       |
| 2                           |                 | NH <sub>2</sub> | -421.2961495            | -421.106694                               | -421.09598                               | -421.140849       |
| 3                           |                 | OH              | -441.158421             | -440.981643                               | -440.971138                              | -441.015669       |
| 4                           |                 | F               | -465.1761344            | -465.011874                               | -465.001688                              | -465.045794       |
| 5                           |                 | CHO             | -479.2483154            | -479.066242                               | -479.054859                              | -479.101865       |
| 6                           |                 | CN              | -458.179063             | -458.007989                               | -457.996776                              | -458.043367       |
| 7                           |                 | NO <sub>2</sub> | -570.3969899            | -570.221451                               | -570.209514                              | -570.259139       |

| Octatetraene [Starting Material], (Hartree) |                |                |                         |                                           |                                          |                   |
|---------------------------------------------|----------------|----------------|-------------------------|-------------------------------------------|------------------------------------------|-------------------|
| Entry                                       | R <sub>1</sub> | R <sub>2</sub> | Total Electronic Energy | Sum of Electronic and Zero-Point Energies | Sum of Electronic and Thermal Enthalpies | Gibbs Free Energy |

|   |    |                 |              |             |             |             |
|---|----|-----------------|--------------|-------------|-------------|-------------|
| 1 | OH | CH <sub>3</sub> | -425.142827  | -424.955687 | -424.944329 | -424.991684 |
| 2 |    | NH <sub>2</sub> | -441.1833737 | -441.007019 | -440.995164 | -441.044036 |
| 3 |    | OH              | -461.045738  | -460.882477 | -460.870541 | -460.921383 |
| 4 |    | F               | -485.0604117 | -484.909689 | -484.8981   | -484.948017 |
| 5 |    | CHO             | -499.1272706 | -498.958627 | -498.946717 | -498.996781 |
| 6 |    | CN              | -478.0643621 | -477.90647  | -477.894099 | -477.945246 |
| 7 |    | NO <sub>2</sub> | -590.2755509 | -590.113272 | -590.100148 | -590.153992 |

| Transition State, (Hartree) |                |                 |                         |                                           |                                          |                   |
|-----------------------------|----------------|-----------------|-------------------------|-------------------------------------------|------------------------------------------|-------------------|
| Entry                       | R <sub>1</sub> | R <sub>2</sub>  | Total Electronic Energy | Sum of Electronic and Zero-Point Energies | Sum of Electronic and Thermal Enthalpies | Gibbs Free Energy |
| 1                           | OH             | CH <sub>3</sub> | -425.1169105            | -424.92935                                | -424.918398                              | -424.966773       |
| 2                           |                | NH <sub>2</sub> | -441.1579165            | -440.98102                                | -440.970621                              | -441.01493        |
| 3                           |                | OH              | -461.0200707            | -460.855846                               | -460.845659                              | -460.889604       |
| 4                           |                | F               | -485.0375874            | -484.88579                                | -484.875961                              | -484.919404       |
| 5                           |                | CHO             | -499.109724             | -498.94021                                | -498.929161                              | -498.975544       |
| 6                           |                | CN              | -478.0401652            | -477.881488                               | -477.870661                              | -477.916509       |
| 7                           |                | NO <sub>2</sub> | -590.2579352            | -590.09479                                | -590.083245                              | -590.131907       |

| Octatetraene [Starting Material], (Hartree) |                |                 |                         |                                           |                                          |                   |
|---------------------------------------------|----------------|-----------------|-------------------------|-------------------------------------------|------------------------------------------|-------------------|
| Entry                                       | R <sub>1</sub> | R <sub>2</sub>  | Total Electronic Energy | Sum of Electronic and Zero-Point Energies | Sum of Electronic and Thermal Enthalpies | Gibbs Free Energy |
| 1                                           | F              | CH <sub>3</sub> | -449.1583427            | -448.983831                               | -448.972699                              | -449.020075       |
| 2                                           |                | NH <sub>2</sub> | -465.1994677            | -465.03561                                | -465.024069                              | -465.072468       |
| 3                                           |                | OH              | -485.058016             | -484.907074                               | -484.895669                              | -484.944043       |
| 4                                           |                | F               | -509.0753101            | -508.93726                                | -508.926826                              | -508.972965       |
| 5                                           |                | CHO             | -523.1424048            | -522.985858                               | -522.973608                              | -523.024315       |
| 6                                           |                | CN              | -502.0781644            | -501.932922                               | -501.92072                               | -501.974022       |
| 7                                           |                | NO <sub>2</sub> | -614.2889086            | -614.139193                               | -614.126322                              | -614.179754       |

| Transition State, (Hartree) |                |                 |                         |                                           |                                          |                   |
|-----------------------------|----------------|-----------------|-------------------------|-------------------------------------------|------------------------------------------|-------------------|
| Entry                       | R <sub>1</sub> | R <sub>2</sub>  | Total Electronic Energy | Sum of Electronic and Zero-Point Energies | Sum of Electronic and Thermal Enthalpies | Gibbs Free Energy |
| 1                           | F              | CH <sub>3</sub> | -449.1334174            | -448.958198                               | -448.947673                              | -448.993046       |
| 2                           |                | NH <sub>2</sub> | -465.1745868            | -465.010111                               | -465.000029                              | -465.043887       |
| 3                           |                | OH              | -485.0357801            | -484.884248                               | -484.874292                              | -484.918005       |
| 4                           |                | F               | -509.0534845            | -508.914163                               | -508.904634                              | -508.947676       |
| 5                           |                | CHO             | -523.1255028            | -522.968291                               | -522.957591                              | -523.003448       |
| 6                           |                | CN              | -502.0553259            | -501.909276                               | -501.898734                              | -501.944216       |
| 7                           |                | NO <sub>2</sub> | -614.2728837            | -614.122449                               | -614.111148                              | -614.159826       |

| Octatetraene [Starting Material], (Hartree) |                |                 |                         |                                           |                                          |                   |
|---------------------------------------------|----------------|-----------------|-------------------------|-------------------------------------------|------------------------------------------|-------------------|
| Entry                                       | R <sub>1</sub> | R <sub>2</sub>  | Total Electronic Energy | Sum of Electronic and Zero-Point Energies | Sum of Electronic and Thermal Enthalpies | Gibbs Free Energy |
| 1                                           | CHO            | CH <sub>3</sub> | -463.2248604            | -463.032357                               | -463.019434                              | -463.071349       |
| 2                                           |                | NH <sub>2</sub> | -479.2652354            | -479.083863                               | -479.071172                              | -479.122525       |
| 3                                           |                | OH              | -499.1271134            | -498.958322                               | -498.945822                              | -498.996835       |
| 4                                           |                | F               | -523.1408648            | -522.984773                               | -522.972557                              | -523.02321        |
| 5                                           |                | CHO             | -537.2082997            | -537.034236                               | -537.020797                              | -537.074538       |
| 6                                           |                | CN              | -516.1432295            | -515.980294                               | -515.967076                              | -516.020207       |
| 7                                           |                | NO <sub>2</sub> | -628.35435              | -628.186935                               | -628.173012                              | -628.228621       |

| Transition State, (Hartree) |                |                |                         |                                  |                               |                   |
|-----------------------------|----------------|----------------|-------------------------|----------------------------------|-------------------------------|-------------------|
| Entry                       | R <sub>1</sub> | R <sub>2</sub> | Total Electronic Energy | Sum of Electronic and Zero-Point | Sum of Electronic and Thermal | Gibbs Free Energy |

|   |     |                 |              | Energies    | Enthalpies  |             |
|---|-----|-----------------|--------------|-------------|-------------|-------------|
| 1 | CHO | CH <sub>3</sub> | -463.2076058 | -463.014294 | -463.002682 | -463.05039  |
| 2 |     | NH <sub>2</sub> | -479.2468696 | -479.064861 | -479.053451 | -479.100523 |
| 3 |     | OH              | -499.1095064 | -498.939915 | -498.928862 | -498.975326 |
| 4 |     | F               | -523.1264395 | -522.969432 | -522.958657 | -523.004767 |
| 5 |     | CHO             | -537.1989817 | -537.024179 | -537.012194 | -537.0612   |
| 6 |     | CN              | -516.1286815 | -515.964771 | -515.952974 | -516.001546 |
| 7 |     | NO <sub>2</sub> | -628.3463673 | -628.17811  | -628.165581 | -628.217064 |

| Octatetraene [Starting Material], (Hartree) |                |                 |                         |                                           |                                          |                   |
|---------------------------------------------|----------------|-----------------|-------------------------|-------------------------------------------|------------------------------------------|-------------------|
| Entry                                       | R <sub>1</sub> | R <sub>2</sub>  | Total Electronic Energy | Sum of Electronic and Zero-Point Energies | Sum of Electronic and Thermal Enthalpies | Gibbs Free Energy |
| 1                                           | CN             | CH <sub>3</sub> | -442.1587942            | -441.977035                               | -441.964195                              | -442.016821       |
| 2                                           |                | NH <sub>2</sub> | -458.2009584            | -458.030128                               | -458.017654                              | -458.068537       |
| 3                                           |                | OH              | -478.0569842            | -477.899747                               | -477.888688                              | -477.935963       |
| 4                                           |                | F               | -502.0750456            | -501.929669                               | -501.918469                              | -501.966196       |
| 5                                           |                | CHO             | -516.1450194            | -515.981783                               | -515.969289                              | -516.021206       |
| 6                                           |                | CN              | -495.0764673            | -494.924504                               | -494.911338                              | -494.965208       |
| 7                                           |                | NO <sub>2</sub> | -607.2869748            | -607.130098                               | -607.116394                              | -607.171478       |

| Transition State, (Hartree) |                |                 |                         |                                           |                                          |                   |
|-----------------------------|----------------|-----------------|-------------------------|-------------------------------------------|------------------------------------------|-------------------|
| Entry                       | R <sub>1</sub> | R <sub>2</sub>  | Total Electronic Energy | Sum of Electronic and Zero-Point Energies | Sum of Electronic and Thermal Enthalpies | Gibbs Free Energy |
| 1                           | CN             | CH <sub>3</sub> | -442.1381758            | -441.955778                               | -441.944391                              | -441.991552       |
| 2                           |                | NH <sub>2</sub> | -458.1788138            | -458.007417                               | -457.99637                               | -458.042574       |
| 3                           |                | OH              | -478.0393076            | -477.880825                               | -477.86991                               | -477.915959       |
| 4                           |                | F               | -502.0566695            | -501.910481                               | -501.899971                              | -501.945391       |
| 5                           |                | CHO             | -516.1305439            | -515.966355                               | -515.954726                              | -516.002857       |
| 6                           |                | CN              | -495.0581626            | -494.905071                               | -494.893555                              | -494.941389       |
| 7                           |                | NO <sub>2</sub> | -607.2756773            | -607.118184                               | -607.105964                              | -607.156375       |

| Octatetraene [Starting Material], (Hartree) |                 |                 |                         |                                           |                                          |                   |
|---------------------------------------------|-----------------|-----------------|-------------------------|-------------------------------------------|------------------------------------------|-------------------|
| Entry                                       | R <sub>1</sub>  | R <sub>2</sub>  | Total Electronic Energy | Sum of Electronic and Zero-Point Energies | Sum of Electronic and Thermal Enthalpies | Gibbs Free Energy |
| 1                                           | NO <sub>2</sub> | CH <sub>3</sub> | -554.3715277            | -554.185275                               | -554.171919                              | -554.225269       |
| 2                                           |                 | NH <sub>2</sub> | -570.4135689            | -570.238411                               | -570.225273                              | -570.278261       |
| 3                                           |                 | OH              | -590.2746267            | -590.112444                               | -590.099417                              | -590.152383       |
| 4                                           |                 | F               | -614.2873465            | -614.137908                               | -614.125152                              | -614.177814       |
| 5                                           |                 | CHO             | -628.3537813            | -628.186919                               | -628.172882                              | -628.228989       |
| 6                                           |                 | CN              | -607.2886065            | -607.132623                               | -607.118806                              | -607.174341       |
| 7                                           |                 | NO <sub>2</sub> | -719.4996285            | -719.339109                               | -719.324616                              | -719.382356       |

| Transition State, (Hartree) |                 |                 |                         |                                           |                                          |                   |
|-----------------------------|-----------------|-----------------|-------------------------|-------------------------------------------|------------------------------------------|-------------------|
| Entry                       | R <sub>1</sub>  | R <sub>2</sub>  | Total Electronic Energy | Sum of Electronic and Zero-Point Energies | Sum of Electronic and Thermal Enthalpies | Gibbs Free Energy |
| 1                           | NO <sub>2</sub> | CH <sub>3</sub> | -554.3571213            | -554.170333                               | -554.158227                              | -554.207866       |
| 2                           |                 | NH <sub>2</sub> | -570.3978483            | -570.221889                               | -570.210206                              | -570.258491       |
| 3                           |                 | OH              | -590.2589492            | -590.095671                               | -590.084201                              | -590.132167       |
| 4                           |                 | F               | -614.2752962            | -614.124552                               | -614.113391                              | -614.160987       |
| 5                           |                 | CHO             | -628.3473282            | -628.178875                               | -628.166482                              | -628.217076       |
| 6                           |                 | CN              | -607.2765131            | -607.119067                               | -607.106866                              | -607.156937       |
| 7                           |                 | NO <sub>2</sub> | -719.4939556            | -719.332147                               | -719.319241                              | -719.371851       |



## 4.12 2,7-substituted

| Octatetraene [Starting Material], (Hartree) |                 |                 |                         |                                           |                                          |                   |
|---------------------------------------------|-----------------|-----------------|-------------------------|-------------------------------------------|------------------------------------------|-------------------|
| Entry                                       | R <sub>1</sub>  | R <sub>2</sub>  | Total Electronic Energy | Sum of Electronic and Zero-Point Energies | Sum of Electronic and Thermal Enthalpies | Gibbs Free Energy |
| 1                                           | CH <sub>3</sub> | CH <sub>3</sub> | -389.2342196            | -389.021484                               | -389.009456                              | -389.059112       |
| 2                                           |                 | NH <sub>2</sub> | -405.2758008            | -405.07488                                | -405.062925                              | -405.112317       |
| 3                                           |                 | OH              | -425.136623             | -424.94877                                | -424.936931                              | -424.986392       |
| 4                                           |                 | F               | -449.1539698            | -448.978102                               | -448.966587                              | -449.01538        |
| 5                                           |                 | CHO             | -463.2208177            | -463.027699                               | -463.015011                              | -463.066748       |
| 6                                           |                 | CN              | -442.1541591            | -441.971793                               | -441.959251                              | -442.01113        |
| 7                                           |                 | NO <sub>2</sub> | -554.3671972            | -554.180972                               | -554.167709                              | -554.221958       |

| Transition State, (Hartree) |                 |                 |                         |                                           |                                          |                   |
|-----------------------------|-----------------|-----------------|-------------------------|-------------------------------------------|------------------------------------------|-------------------|
| Entry                       | R <sub>1</sub>  | R <sub>2</sub>  | Total Electronic Energy | Sum of Electronic and Zero-Point Energies | Sum of Electronic and Thermal Enthalpies | Gibbs Free Energy |
| 1                           | CH <sub>3</sub> | CH <sub>3</sub> | -389.2176847            | -389.006387                               | -388.995116                              | -389.04164        |
| 2                           |                 | NH <sub>2</sub> | -405.256599             | -405.056485                               | -405.045378                              | -405.09139        |
| 3                           |                 | OH              | -425.1179615            | -424.930294                               | -424.919508                              | -424.96489        |
| 4                           |                 | F               | -449.1353857            | -448.959952                               | -448.949574                              | -448.994309       |
| 5                           |                 | CHO             | -463.2102024            | -463.01709                                | -463.005444                              | -463.053397       |
| 6                           |                 | CN              | -442.1407035            | -441.958384                               | -441.946931                              | -441.994525       |
| 7                           |                 | NO <sub>2</sub> | -554.3597846            | -554.173094                               | -554.160963                              | -554.210891       |

| Octatetraene [Starting Material], (Hartree) |                 |                 |                         |                                           |                                          |                   |
|---------------------------------------------|-----------------|-----------------|-------------------------|-------------------------------------------|------------------------------------------|-------------------|
| Entry                                       | R <sub>1</sub>  | R <sub>2</sub>  | Total Electronic Energy | Sum of Electronic and Zero-Point Energies | Sum of Electronic and Thermal Enthalpies | Gibbs Free Energy |
| 1                                           | NH <sub>2</sub> | NH <sub>2</sub> | -421.3173175            | -421.127598                               | -421.115865                              | -421.16438        |
| 2                                           |                 | OH              | -441.1800874            | -441.003023                               | -440.991374                              | -441.039984       |
| 3                                           |                 | F               | -465.1955336            | -465.031219                               | -465.019804                              | -465.068197       |
| 4                                           |                 | CHO             | -479.2622396            | -479.080284                               | -479.067796                              | -479.11878        |
| 5                                           |                 | CN              | -458.1958511            | -458.024892                               | -458.01254                               | -458.06355        |
| 6                                           |                 | NO <sub>2</sub> | -570.4094729            | -570.234302                               | -570.221294                              | -570.274315       |

| Transition State, (Hartree) |                 |                 |                         |                                           |                                          |                   |
|-----------------------------|-----------------|-----------------|-------------------------|-------------------------------------------|------------------------------------------|-------------------|
| Entry                       | R <sub>1</sub>  | R <sub>2</sub>  | Total Electronic Energy | Sum of Electronic and Zero-Point Energies | Sum of Electronic and Thermal Enthalpies | Gibbs Free Energy |
| 1                           | NH <sub>2</sub> | NH <sub>2</sub> | -421.2946542            | -421.105559                               | -421.094687                              | -421.140041       |
| 2                           |                 | OH              | -441.1568545            | -440.980253                               | -440.96975                               | -441.014358       |
| 3                           |                 | F               | -465.1743051            | -465.010233                               | -464.999987                              | -465.044316       |
| 4                           |                 | CHO             | -479.2499435            | -479.068018                               | -479.056543                              | -479.103928       |
| 5                           |                 | CN              | -458.1810126            | -458.009809                               | -457.998577                              | -458.045397       |
| 6                           |                 | NO <sub>2</sub> | -570.4004215            | -570.224846                               | -570.21295                               | -570.262043       |

| Octatetraene [Starting Material], (Hartree) |                |                 |                         |                                           |                                          |                   |
|---------------------------------------------|----------------|-----------------|-------------------------|-------------------------------------------|------------------------------------------|-------------------|
| Entry                                       | R <sub>1</sub> | R <sub>2</sub>  | Total Electronic Energy | Sum of Electronic and Zero-Point Energies | Sum of Electronic and Thermal Enthalpies | Gibbs Free Energy |
| 1                                           | OH             | OH              | -461.0431417            | -460.879279                               | -460.867515                              | -460.91718        |
| 2                                           |                | F               | -485.0587003            | -484.907369                               | -484.89682                               | -484.943028       |
| 3                                           |                | CHO             | -499.1251538            | -498.955782                               | -498.943473                              | -498.994195       |
| 4                                           |                | CN              | -478.059018             | -477.900694                               | -477.888425                              | -477.939902       |
| 5                                           |                | NO <sub>2</sub> | -590.2716818            | -590.109356                               | -590.096455                              | -590.149348       |

| Transition State, (Hartree) |  |  |  |  |  |  |
|-----------------------------|--|--|--|--|--|--|
|-----------------------------|--|--|--|--|--|--|

| Entry | R <sub>1</sub> | R <sub>2</sub>  | Total Electronic Energy | Sum of Electronic and Zero-Point Energies | Sum of Electronic and Thermal Enthalpies | Gibbs Free Energy |
|-------|----------------|-----------------|-------------------------|-------------------------------------------|------------------------------------------|-------------------|
| 1     | OH             | OH              | -461.0188259            | -460.85485                                | -460.844615                              | -460.88875        |
| 2     |                | F               | -485.0359971            | -484.884442                               | -484.874539                              | -484.91822        |
| 3     |                | CHO             | -499.1120324            | -498.942451                               | -498.93139                               | -498.978005       |
| 4     |                | CN              | -478.0423173            | -477.88361                                | -477.872735                              | -477.918883       |
| 5     |                | NO <sub>2</sub> | -590.2616717            | -590.098663                               | -590.087103                              | -590.135594       |

| Octatetraene [Starting Material], (Hartree) |                |                 |                         |                                           |                                          |                   |
|---------------------------------------------|----------------|-----------------|-------------------------|-------------------------------------------|------------------------------------------|-------------------|
| Entry                                       | R <sub>1</sub> | R <sub>2</sub>  | Total Electronic Energy | Sum of Electronic and Zero-Point Energies | Sum of Electronic and Thermal Enthalpies | Gibbs Free Energy |
| 1                                           | F              | F               | -509.0739018            | -508.934888                               | -508.923869                              | -508.971937       |
| 2                                           |                | CHO             | -523.1400455            | -522.983283                               | 522.971223                               | -523.021701       |
| 3                                           |                | CN              | -502.0739674            | -501.928425                               | -501.917288                              | -501.965304       |
| 4                                           |                | NO <sub>2</sub> | -614.2863914            | -614.136589                               | -614.123967                              | -614.17649        |

| Transition State, (Hartree) |                |                 |                         |                                           |                                          |                   |
|-----------------------------|----------------|-----------------|-------------------------|-------------------------------------------|------------------------------------------|-------------------|
| Entry                       | R <sub>1</sub> | R <sub>2</sub>  | Total Electronic Energy | Sum of Electronic and Zero-Point Energies | Sum of Electronic and Thermal Enthalpies | Gibbs Free Energy |
| 1                           | F              | F               | -509.0523128            | -508.913161                               | -508.903568                              | -508.946848       |
| 2                           |                | CHO             | -523.126919             | -522.969963                               | -522.959182                              | -523.005404       |
| 3                           |                | CN              | -502.0570214            | -501.910835                               | -501.900288                              | -501.945945       |
| 4                           |                | NO <sub>2</sub> | -614.2757938            | -614.125402                               | -614.114133                              | -614.16232        |

| Octatetraene [Starting Material], (Hartree) |                |                 |                         |                                           |                                          |                   |
|---------------------------------------------|----------------|-----------------|-------------------------|-------------------------------------------|------------------------------------------|-------------------|
| Entry                                       | R <sub>1</sub> | R <sub>2</sub>  | Total Electronic Energy | Sum of Electronic and Zero-Point Energies | Sum of Electronic and Thermal Enthalpies | Gibbs Free Energy |
| 1                                           | CHO            | CHO             | -537.2061597            | -537.032358                               | -537.019076                              | -537.072868       |
| 2                                           |                | CN              | -516.1399205            | -515.976807                               | -515.963729                              | -516.017062       |
| 3                                           |                | NO <sub>2</sub> | -628.3528704            | -628.185758                               | -628.171994                              | -628.227441       |

| Transition State, (Hartree) |                |                 |                         |                                           |                                          |                   |
|-----------------------------|----------------|-----------------|-------------------------|-------------------------------------------|------------------------------------------|-------------------|
| Entry                       | R <sub>1</sub> | R <sub>2</sub>  | Total Electronic Energy | Sum of Electronic and Zero-Point Energies | Sum of Electronic and Thermal Enthalpies | Gibbs Free Energy |
| 1                           | CHO            | CHO             | -537.1981954            | -537.023506                               | -537.011473                              | -537.060869       |
| 2                           |                | CN              | -516.1288838            | -515.965083                               | -515.95329                               | -516.002046       |
| 3                           |                | NO <sub>2</sub> | -628.3469263            | -628.178908                               | -628.166377                              | -628.218128       |

| Octatetraene [Starting Material], (Hartree) |                |                 |                         |                                           |                                          |                   |
|---------------------------------------------|----------------|-----------------|-------------------------|-------------------------------------------|------------------------------------------|-------------------|
| Entry                                       | R <sub>1</sub> | R <sub>2</sub>  | Total Electronic Energy | Sum of Electronic and Zero-Point Energies | Sum of Electronic and Thermal Enthalpies | Gibbs Free Energy |
| 1                                           | CN             | CN              | -495.0738787            | -494.921816                               | -494.909689                              | -494.960481       |
| 2                                           |                | NO <sub>2</sub> | -607.2860807            | -607.129708                               | -607.116054                              | -607.17192        |

| Transition State, (Hartree) |                |                 |                         |                                           |                                          |                   |
|-----------------------------|----------------|-----------------|-------------------------|-------------------------------------------|------------------------------------------|-------------------|
| Entry                       | R <sub>1</sub> | R <sub>2</sub>  | Total Electronic Energy | Sum of Electronic and Zero-Point Energies | Sum of Electronic and Thermal Enthalpies | Gibbs Free Energy |
| 1                           | CN             | CN              | -495.0588604            | -494.905841                               | -494.894322                              | -494.942332       |
| 2                           |                | NO <sub>2</sub> | -607.276998             | -607.119494                               | -607.107305                              | -607.157544       |

| Octatetraene [Starting Material], (Hartree) |                |                |                         |                                  |                               |                   |
|---------------------------------------------|----------------|----------------|-------------------------|----------------------------------|-------------------------------|-------------------|
| Entry                                       | R <sub>1</sub> | R <sub>2</sub> | Total Electronic Energy | Sum of Electronic and Zero-Point | Sum of Electronic and Thermal | Gibbs Free Energy |

|   |                 |                 |            | Energies    | Enthalpies  |             |
|---|-----------------|-----------------|------------|-------------|-------------|-------------|
| 1 | NO <sub>2</sub> | NO <sub>2</sub> | -719.49726 | -719.336909 | -719.322469 | -719.380978 |

| Transition State, (Hartree) |                 |                 |                         |                                           |                                          |                   |
|-----------------------------|-----------------|-----------------|-------------------------|-------------------------------------------|------------------------------------------|-------------------|
| Entry                       | R <sub>1</sub>  | R <sub>2</sub>  | Total Electronic Energy | Sum of Electronic and Zero-Point Energies | Sum of Electronic and Thermal Enthalpies | Gibbs Free Energy |
| 1                           | NO <sub>2</sub> | NO <sub>2</sub> | -719.4947965            | -719.333272                               | -719.320324                              | -719.373183       |

#### 4.13 3,4-substituted

| Octatetraene [Starting Material], (Hartree) |                 |                 |                         |                                           |                                          |                   |
|---------------------------------------------|-----------------|-----------------|-------------------------|-------------------------------------------|------------------------------------------|-------------------|
| Entry                                       | R <sub>1</sub>  | R <sub>2</sub>  | Total Electronic Energy | Sum of Electronic and Zero-Point Energies | Sum of Electronic and Thermal Enthalpies | Gibbs Free Energy |
| 1                                           | CH <sub>3</sub> | CH <sub>3</sub> | -389.2338848            | -389.023087                               | -389.010401                              | -389.061089       |
| 2                                           |                 | NH <sub>2</sub> | -405.2774039            | -405.077036                               | -405.064686                              | -405.114371       |
| 3                                           |                 | OH              | -425.14047              | -424.952781                               | -424.940697                              | -424.989702       |
| 4                                           |                 | F               | -449.1573952            | -448.982837                               | -448.971617                              | -449.018566       |
| 5                                           |                 | CHO             | -463.2211275            | -463.029208                               | -463.015923                              | -463.068453       |
| 6                                           |                 | CN              | -442.1601859            | -441.97883                                | -441.965864                              | -442.018207       |
| 7                                           |                 | NO <sub>2</sub> | -554.36988              | -554.183927                               | -554.170328                              | -554.223994       |

| Transition State, (Hartree) |                 |                 |                         |                                           |                                          |                   |
|-----------------------------|-----------------|-----------------|-------------------------|-------------------------------------------|------------------------------------------|-------------------|
| Entry                       | R <sub>1</sub>  | R <sub>2</sub>  | Total Electronic Energy | Sum of Electronic and Zero-Point Energies | Sum of Electronic and Thermal Enthalpies | Gibbs Free Energy |
| 1                           | CH <sub>3</sub> | CH <sub>3</sub> | -389.2077263            | -388.995794                               | -388.984807                              | -389.030489       |
| 2                           |                 | NH <sub>2</sub> | -405.2495541            | -405.048476                               | -405.037819                              | -405.082464       |
| 3                           |                 | OH              | -425.1140695            | -424.926002                               | -424.915444                              | -424.959954       |
| 4                           |                 | F               | -449.1337623            | -448.958203                               | -448.947887                              | -448.992174       |
| 5                           |                 | CHO             | -463.198808             | -463.005177                               | -462.993713                              | -463.041082       |
| 6                           |                 | CN              | -442.1358521            | -441.953373                               | -441.942119                              | -441.988649       |
| 7                           |                 | NO <sub>2</sub> | -554.3485199            | -554.161451                               | -554.14957                               | -554.197935       |

| Octatetraene [Starting Material], (Hartree) |                 |                 |                         |                                           |                                          |                   |
|---------------------------------------------|-----------------|-----------------|-------------------------|-------------------------------------------|------------------------------------------|-------------------|
| Entry                                       | R <sub>1</sub>  | R <sub>2</sub>  | Total Electronic Energy | Sum of Electronic and Zero-Point Energies | Sum of Electronic and Thermal Enthalpies | Gibbs Free Energy |
| 1                                           | NH <sub>2</sub> | CH <sub>3</sub> | -405.2759789            | -405.075316                               | -405.063155                              | -405.112069       |
| 2                                           |                 | NH <sub>2</sub> | -421.3164309            | -421.126841                               | -421.114853                              | -421.163463       |
| 3                                           |                 | OH              | -441.1805893            | -441.004049                               | -440.992214                              | -441.040604       |
| 4                                           |                 | F               | -465.1969622            | -465.032936                               | -465.021287                              | -465.069533       |
| 5                                           |                 | CHO             | -479.2663968            | -479.084978                               | -479.072214                              | -479.122992       |
| 6                                           |                 | CN              | -458.2070126            | -458.036051                               | -458.023525                              | -458.07401        |
| 7                                           |                 | NO <sub>2</sub> | -570.422265             | -570.247359                               | -570.234274                              | -570.286305       |

| Transition State, (Hartree) |                 |                 |                         |                                           |                                          |                   |
|-----------------------------|-----------------|-----------------|-------------------------|-------------------------------------------|------------------------------------------|-------------------|
| Entry                       | R <sub>1</sub>  | R <sub>2</sub>  | Total Electronic Energy | Sum of Electronic and Zero-Point Energies | Sum of Electronic and Thermal Enthalpies | Gibbs Free Energy |
| 1                           | NH <sub>2</sub> | CH <sub>3</sub> | -405.2483887            | -405.047249                               | -405.036554                              | -405.081336       |
| 2                           |                 | NH <sub>2</sub> | -421.2928043            | -421.102332                               | -421.092092                              | -421.135832       |
| 3                           |                 | OH              | -441.154632             | -440.977538                               | -440.967178                              | -441.011191       |
| 4                           |                 | F               | -465.1732959            | -465.008697                               | -464.998639                              | -465.042262       |
| 5                           |                 | CHO             | -479.2428656            | -479.060063                               | -479.048997                              | -479.095079       |
| 6                           |                 | CN              | -458.1796263            | -458.007839                               | -457.996925                              | -458.042668       |
| 7                           |                 | NO <sub>2</sub> | -570.390836             | -570.21492                                | -570.203302                              | -570.251115       |

| Octatetraene [Starting Material], (Hartree) |                |                |                         |                                           |                                          |                   |
|---------------------------------------------|----------------|----------------|-------------------------|-------------------------------------------|------------------------------------------|-------------------|
| Entry                                       | R <sub>1</sub> | R <sub>2</sub> | Total Electronic Energy | Sum of Electronic and Zero-Point Energies | Sum of Electronic and Thermal Enthalpies | Gibbs Free Energy |

|   |    |                 |              |             |             |             |
|---|----|-----------------|--------------|-------------|-------------|-------------|
| 1 | OH | CH <sub>3</sub> | -425.1368797 | -424.949078 | -424.937018 | -424.986143 |
| 2 |    | NH <sub>2</sub> | -441.180528  | -441.004206 | -440.992315 | -441.040795 |
| 3 |    | OH              | -461.0342281 | -460.870903 | -460.859058 | -460.907634 |
| 4 |    | F               | -485.0510541 | -484.899952 | -484.888447 | -484.936465 |
| 5 |    | CHO             | -499.1265333 | -498.958144 | -498.945469 | -498.996282 |
| 6 |    | CN              | -478.0593775 | -477.900954 | -477.88867  | -477.938541 |
| 7 |    | NO <sub>2</sub> | -478.035171  | -477.876565 | -477.865702 | -477.911458 |

| Transition State, (Hartree) |                |                 |                         |                                           |                                          |                   |
|-----------------------------|----------------|-----------------|-------------------------|-------------------------------------------|------------------------------------------|-------------------|
| Entry                       | R <sub>1</sub> | R <sub>2</sub>  | Total Electronic Energy | Sum of Electronic and Zero-Point Energies | Sum of Electronic and Thermal Enthalpies | Gibbs Free Energy |
| 1                           | OH             | CH <sub>3</sub> | -425.1122656            | -424.924064                               | -424.913511                              | -424.958057       |
| 2                           |                | NH <sub>2</sub> | -441.1534817            | -440.976343                               | -440.965957                              | -441.010048       |
| 3                           |                | OH              | -461.0079252            | -460.843902                               | -460.833608                              | -460.877608       |
| 4                           |                | F               | -485.0277619            | -484.876322                               | -484.866327                              | -484.909946       |
| 5                           |                | CHO             | -499.1047091            | -498.934943                               | -498.923932                              | -498.970161       |
| 6                           |                | CN              | -478.035171             | -477.876565                               | -477.865702                              | -477.911458       |
| 7                           |                | NO <sub>2</sub> | -590.2666753            | -590.10492                                | -590.091571                              | -590.144498       |

| Octatetraene [Starting Material], (Hartree) |                |                 |                         |                                           |                                          |                   |
|---------------------------------------------|----------------|-----------------|-------------------------|-------------------------------------------|------------------------------------------|-------------------|
| Entry                                       | R <sub>1</sub> | R <sub>2</sub>  | Total Electronic Energy | Sum of Electronic and Zero-Point Energies | Sum of Electronic and Thermal Enthalpies | Gibbs Free Energy |
| 1                                           | F              | CH <sub>3</sub> | -449.1545685            | -448.97932                                | -448.967519                              | -449.016271       |
| 2                                           |                | NH <sub>2</sub> | -465.1965587            | -465.03254                                | -465.020924                              | -465.06911        |
| 3                                           |                | OH              | -485.0510703            | -484.899996                               | -484.888496                              | -484.936517       |
| 4                                           |                | F               | -509.0664767            | -508.927982                               | -508.916662                              | -508.964739       |
| 5                                           |                | CHO             | -523.1412768            | -522.985435                               | -522.973026                              | -523.023581       |
| 6                                           |                | CN              | -502.0731139            | -501.927922                               | -501.916475                              | -501.964687       |
| 7                                           |                | NO <sub>2</sub> | -614.2801382            | -614.130522                               | -614.117648                              | -614.169795       |

| Transition State, (Hartree) |                |                 |                         |                                           |                                          |                   |
|-----------------------------|----------------|-----------------|-------------------------|-------------------------------------------|------------------------------------------|-------------------|
| Entry                       | R <sub>1</sub> | R <sub>2</sub>  | Total Electronic Energy | Sum of Electronic and Zero-Point Energies | Sum of Electronic and Thermal Enthalpies | Gibbs Free Energy |
| 1                           | F              | CH <sub>3</sub> | -449.1311174            | -448.95552                                | -448.945214                              | -448.989499       |
| 2                           |                | NH <sub>2</sub> | -465.1713192            | -465.006399                               | -464.996429                              | -465.039853       |
| 3                           |                | OH              | -485.0268749            | -484.875064                               | -484.865206                              | -484.908497       |
| 4                           |                | F               | -509.0448733            | -508.905781                               | -508.896183                              | -508.939177       |
| 5                           |                | CHO             | -523.1214903            | -522.96434                                | -522.953609                              | -522.999446       |
| 6                           |                | CN              | -502.0508517            | -501.904661                               | -501.894142                              | -501.939379       |
| 7                           |                | NO <sub>2</sub> | -614.25997              | -614.109974                               | -614.098602                              | -614.146342       |

| Octatetraene [Starting Material], (Hartree) |                |                 |                         |                                           |                                          |                   |
|---------------------------------------------|----------------|-----------------|-------------------------|-------------------------------------------|------------------------------------------|-------------------|
| Entry                                       | R <sub>1</sub> | R <sub>2</sub>  | Total Electronic Energy | Sum of Electronic and Zero-Point Energies | Sum of Electronic and Thermal Enthalpies | Gibbs Free Energy |
| 1                                           | CHO            | CH <sub>3</sub> | -463.2191027            | -463.026752                               | -463.013674                              | -463.065592       |
| 2                                           |                | NH <sub>2</sub> | -479.2673903            | -479.085881                               | -479.073097                              | -479.124286       |
| 3                                           |                | OH              | -499.1279843            | -498.958772                               | -498.946224                              | -498.996988       |
| 4                                           |                | F               | -523.1418104            | -522.985091                               | -522.972682                              | -523.023621       |
| 5                                           |                | CHO             | -537.2008563            | -537.027113                               | -537.013505                              | -537.067257       |
| 6                                           |                | CN              | -516.1408622            | -515.977918                               | -515.964582                              | -516.017483       |
| 7                                           |                | NO <sub>2</sub> | -628.3498049            | -628.182466                               | -628.168446                              | -628.223602       |

| Transition State, (Hartree) |                |                 |                         |                                           |                                          |                   |
|-----------------------------|----------------|-----------------|-------------------------|-------------------------------------------|------------------------------------------|-------------------|
| Entry                       | R <sub>1</sub> | R <sub>2</sub>  | Total Electronic Energy | Sum of Electronic and Zero-Point Energies | Sum of Electronic and Thermal Enthalpies | Gibbs Free Energy |
| 1                           | CHO            | CH <sub>3</sub> | -463.1978628            | -463.004224                               | -462.992743                              | -463.040077       |
| 2                           |                | NH <sub>2</sub> | -479.2433606            | -479.060814                               | -479.049685                              | -479.095885       |
| 3                           |                | OH              | -499.1057686            | -498.935981                               | -498.925025                              | -498.971085       |
| 4                           |                | F               | -523.1234749            | -522.966441                               | -522.955693                              | -523.001525       |

|   |  |                 |              |             |             |             |
|---|--|-----------------|--------------|-------------|-------------|-------------|
| 5 |  | CHO             | -537.1868115 | -537.011705 | -536.999867 | -537.0484   |
| 6 |  | CN              | -516.1229115 | -515.958974 | -515.947245 | -515.99541  |
| 7 |  | NO <sub>2</sub> | -628.3348912 | -628.166792 | -628.154366 | -628.204624 |

| Octatetraene [Starting Material], (Hartree) |                |                 |                         |                                           |                                          |                   |
|---------------------------------------------|----------------|-----------------|-------------------------|-------------------------------------------|------------------------------------------|-------------------|
| Entry                                       | R <sub>1</sub> | R <sub>2</sub>  | Total Electronic Energy | Sum of Electronic and Zero-Point Energies | Sum of Electronic and Thermal Enthalpies | Gibbs Free Energy |
| 1                                           | CN             | CH <sub>3</sub> | -442.159266             | -441.97799                                | -441.96508                               | -442.017023       |
| 2                                           |                | NH <sub>2</sub> | -458.2086292            | -458.038138                               | -458.025567                              | -458.076131       |
| 3                                           |                | OH              | -478.0620223            | -477.904225                               | -477.89182                               | -477.942293       |
| 4                                           |                | F               | -502.0756244            | -501.930221                               | -501.918002                              | -501.96842        |
| 5                                           |                | CHO             | -516.1421829            | -515.979282                               | -515.966047                              | -516.018346       |
| 6                                           |                | CN              | -495.0729397            | -494.921113                               | -494.907956                              | -494.96033        |
| 7                                           |                | NO <sub>2</sub> | -607.2817635            | -607.125548                               | -607.11175                               | -607.165904       |

| Transition State, (Hartree) |                |                 |                         |                                           |                                          |                   |
|-----------------------------|----------------|-----------------|-------------------------|-------------------------------------------|------------------------------------------|-------------------|
| Entry                       | R <sub>1</sub> | R <sub>2</sub>  | Total Electronic Energy | Sum of Electronic and Zero-Point Energies | Sum of Electronic and Thermal Enthalpies | Gibbs Free Energy |
| 1                           | CN             | CH <sub>3</sub> | -442.1345906            | -441.951978                               | -441.940761                              | -441.987196       |
| 2                           |                | NH <sub>2</sub> | -458.1792917            | -458.007733                               | -457.996774                              | -458.042584       |
| 3                           |                | OH              | -478.0360046            | -477.877313                               | -477.866486                              | -477.912125       |
| 4                           |                | F               | -502.0526651            | -501.906533                               | -501.896029                              | -501.941225       |
| 5                           |                | CHO             | -516.1229192            | -515.959016                               | -515.94727                               | -515.995525       |
| 6                           |                | CN              | -495.050406             | -494.897922                               | -494.886347                              | -494.934083       |
| 7                           |                | NO <sub>2</sub> | -607.2616115            | -607.104628                               | -607.092334                              | -607.142169       |

| Octatetraene [Starting Material], (Hartree) |                 |                 |                         |                                           |                                          |                   |
|---------------------------------------------|-----------------|-----------------|-------------------------|-------------------------------------------|------------------------------------------|-------------------|
| Entry                                       | R <sub>1</sub>  | R <sub>2</sub>  | Total Electronic Energy | Sum of Electronic and Zero-Point Energies | Sum of Electronic and Thermal Enthalpies | Gibbs Free Energy |
| 1                                           | NO <sub>2</sub> | CH <sub>3</sub> | -554.3681235            | -554.182059                               | -554.168491                              | -554.222066       |
| 2                                           |                 | NH <sub>2</sub> | -570.4236022            | -570.248192                               | -570.235245                              | -570.287156       |
| 3                                           |                 | OH              | -590.2675278            | -590.105486                               | -590.092198                              | -590.145542       |
| 4                                           |                 | F               | -614.2801598            | -614.130862                               | -614.1177                                | -614.171034       |
| 5                                           |                 | CHO             | -628.3492227            | -628.182734                               | -628.16843                               | -628.2242         |
| 6                                           |                 | CN              | -607.2793668            | -607.12367                                | -607.109535                              | -607.165644       |
| 7                                           |                 | NO <sub>2</sub> | -719.4896692            | -719.329465                               | -719.314854                              | -719.371162       |

| Transition State, (Hartree) |                 |                 |                         |                                           |                                          |                   |
|-----------------------------|-----------------|-----------------|-------------------------|-------------------------------------------|------------------------------------------|-------------------|
| Entry                       | R <sub>1</sub>  | R <sub>2</sub>  | Total Electronic Energy | Sum of Electronic and Zero-Point Energies | Sum of Electronic and Thermal Enthalpies | Gibbs Free Energy |
| 1                           | NO <sub>2</sub> | CH <sub>3</sub> | -554.3462917            | -554.159386                               | -554.147433                              | -554.196086       |
| 2                           |                 | NH <sub>2</sub> | -570.3907048            | -570.214549                               | -570.202988                              | -570.250847       |
| 3                           |                 | OH              | -590.2567405            | -590.093249                               | -590.082117                              | -590.129368       |
| 4                           |                 | F               | -614.2611463            | -614.11096                                | -614.099683                              | -614.147128       |
| 5                           |                 | CHO             | -628.3341441            | -628.165855                               | -628.153515                              | -628.203501       |
| 6                           |                 | CN              | -607.2607331            | -607.103885                               | -607.091591                              | -607.141472       |
| 7                           |                 | NO <sub>2</sub> | -719.4743171            | -719.313258                               | -719.300276                              | -719.351828       |

#### 4.14 3,5-substituted

| Octatetraene [Starting Material], (Hartree) |                 |                 |                         |                                           |                                          |                   |
|---------------------------------------------|-----------------|-----------------|-------------------------|-------------------------------------------|------------------------------------------|-------------------|
| Entry                                       | R <sub>1</sub>  | R <sub>2</sub>  | Total Electronic Energy | Sum of Electronic and Zero-Point Energies | Sum of Electronic and Thermal Enthalpies | Gibbs Free Energy |
| 1                                           | CH <sub>3</sub> | CH <sub>3</sub> | -389.2362773            | -389.025124                               | -389.012617                              | -389.062977       |
| 2                                           |                 | NH <sub>2</sub> | -405.2797064            | -405.079459                               | -405.067212                              | -405.116523       |
| 3                                           |                 | OH              | -425.1408093            | -424.953255                               | -424.941123                              | -424.990694       |
| 4                                           |                 | F               | -449.1568673            | -448.982191                               | -448.970214                              | -449.020022       |
| 5                                           |                 | CHO             | -463.2282553            | -463.035798                               | -463.022857                              | -463.074224       |

|   |  |                 |              |             |             |             |
|---|--|-----------------|--------------|-------------|-------------|-------------|
| 6 |  | CN              | -442.1594662 | -441.977724 | -441.964932 | -442.016261 |
| 7 |  | NO <sub>2</sub> | -554.3748695 | -554.189414 | -554.175788 | -554.22969  |

| Transition State, (Hartree) |                 |                 |                         |                                           |                                          |                   |
|-----------------------------|-----------------|-----------------|-------------------------|-------------------------------------------|------------------------------------------|-------------------|
| Entry                       | R <sub>1</sub>  | R <sub>2</sub>  | Total Electronic Energy | Sum of Electronic and Zero-Point Energies | Sum of Electronic and Thermal Enthalpies | Gibbs Free Energy |
| 1                           | CH <sub>3</sub> | CH <sub>3</sub> | -389.062977             | -388.999623                               | -388.988187                              | -389.035534       |
| 2                           |                 | NH <sub>2</sub> | -405.25134              | -405.050843                               | -405.039821                              | -405.085885       |
| 3                           |                 | OH              | -425.1144017            | -424.926682                               | -424.916709                              | -424.960194       |
| 4                           |                 | F               | -449.020022             | -448.958791                               | -448.948328                              | -448.993314       |
| 5                           |                 | CHO             | -463.2058908            | -463.012622                               | -463.001072                              | -463.048458       |
| 6                           |                 | CN              | -442.016261             | -441.953321                               | -441.941914                              | -441.98907        |
| 7                           |                 | NO <sub>2</sub> | -554.3530896            | -554.166352                               | -554.15422                               | -554.203882       |

| Octatetraene [Starting Material], (Hartree) |                 |                 |                         |                                           |                                          |                   |
|---------------------------------------------|-----------------|-----------------|-------------------------|-------------------------------------------|------------------------------------------|-------------------|
| Entry                                       | R <sub>1</sub>  | R <sub>2</sub>  | Total Electronic Energy | Sum of Electronic and Zero-Point Energies | Sum of Electronic and Thermal Enthalpies | Gibbs Free Energy |
| 1                                           | NH <sub>2</sub> | CH <sub>3</sub> | -405.2764512            | -405.076248                               | -405.064013                              | -405.113406       |
| 2                                           |                 | NH <sub>2</sub> | -421.3203128            | -421.13155                                | -421.119436                              | -421.16851        |
| 3                                           |                 | OH              | -441.1813836            | -441.005075                               | -440.993135                              | -441.042282       |
| 4                                           |                 | F               | -465.1975185            | -465.033576                               | -465.021959                              | -465.0704         |
| 5                                           |                 | CHO             | -479.2685493            | -479.086883                               | -479.074213                              | -479.124894       |
| 6                                           |                 | CN              | -458.2004774            | -458.030155                               | -458.017543                              | -458.068381       |
| 7                                           |                 | NO <sub>2</sub> | -570.4155634            | -570.241009                               | -570.227681                              | -570.280661       |

| Transition State, (Hartree) |                 |                 |                         |                                           |                                          |                   |
|-----------------------------|-----------------|-----------------|-------------------------|-------------------------------------------|------------------------------------------|-------------------|
| Entry                       | R <sub>1</sub>  | R <sub>2</sub>  | Total Electronic Energy | Sum of Electronic and Zero-Point Energies | Sum of Electronic and Thermal Enthalpies | Gibbs Free Energy |
| 1                           | NH <sub>2</sub> | CH <sub>3</sub> | -405.2506957            | -405.050399                               | -405.039348                              | -405.085442       |
| 2                           |                 | NH <sub>2</sub> | -421.2913714            | -421.101564                               | -421.091009                              | -421.135361       |
| 3                           |                 | OH              | -441.1552192            | -440.978212                               | -440.967834                              | -441.011963       |
| 4                           |                 | F               | -465.1745974            | -465.010249                               | -465.000187                              | -465.043849       |
| 5                           |                 | CHO             | -479.2456213            | -479.063163                               | -479.051947                              | -479.098434       |
| 6                           |                 | CN              | -458.1759278            | -458.004602                               | -457.993544                              | -458.039652       |
| 7                           |                 | NO <sub>2</sub> | -570.3934699            | -570.217692                               | -570.205955                              | -570.254386       |

| Octatetraene [Starting Material], (Hartree) |                |                 |                         |                                           |                                          |                   |
|---------------------------------------------|----------------|-----------------|-------------------------|-------------------------------------------|------------------------------------------|-------------------|
| Entry                                       | R <sub>1</sub> | R <sub>2</sub>  | Total Electronic Energy | Sum of Electronic and Zero-Point Energies | Sum of Electronic and Thermal Enthalpies | Gibbs Free Energy |
| 1                                           | OH             | CH <sub>3</sub> | -425.1368071            | -424.949403                               | -424.937322                              | -424.986618       |
| 2                                           |                | NH <sub>2</sub> | -441.1765296            | -441.001448                               | -440.989196                              | -441.038972       |
| 3                                           |                | OH              | -461.0418695            | -460.878326                               | -460.86658                               | -460.915193       |
| 4                                           |                | F               | -485.0574961            | -484.906598                               | -484.895092                              | -484.943584       |
| 5                                           |                | CHO             | -499.1280299            | -498.959123                               | -498.946628                              | -498.997028       |
| 6                                           |                | CN              | -478.0601772            | -477.902474                               | -477.890041                              | -477.940665       |
| 7                                           |                | NO <sub>2</sub> | -590.2746213            | -590.113089                               | -590.099858                              | -590.152959       |

| Transition State, (Hartree) |                |                 |                         |                                           |                                          |                   |
|-----------------------------|----------------|-----------------|-------------------------|-------------------------------------------|------------------------------------------|-------------------|
| Entry                       | R <sub>1</sub> | R <sub>2</sub>  | Total Electronic Energy | Sum of Electronic and Zero-Point Energies | Sum of Electronic and Thermal Enthalpies | Gibbs Free Energy |
| 1                           | OH             | CH <sub>3</sub> | -425.1129303            | -424.925327                               | -424.914463                              | -424.95992        |
| 2                           |                | NH <sub>2</sub> | -441.1537835            | -440.977096                               | -440.966687                              | -441.010865       |
| 3                           |                | OH              | -461.0163158            | -460.852152                               | -460.84198                               | -460.885787       |
| 4                           |                | F               | -485.0352472            | -484.883833                               | -484.873919                              | -484.917404       |
| 5                           |                | CHO             | -499.1068692            | -498.937391                               | -498.92632                               | -498.972649       |
| 6                           |                | CN              | -478.0360191            | -477.877603                               | -477.866687                              | -477.912617       |
| 7                           |                | NO <sub>2</sub> | -590.2533186            | -590.090534                               | -590.078935                              | -590.127143       |

| Octatetraene [Starting Material], (Hartree) |  |  |  |  |  |  |
|---------------------------------------------|--|--|--|--|--|--|
|---------------------------------------------|--|--|--|--|--|--|

| Entry | R <sub>1</sub> | R <sub>2</sub>  | Total Electronic Energy | Sum of Electronic and Zero-Point Energies | Sum of Electronic and Thermal Enthalpies | Gibbs Free Energy |
|-------|----------------|-----------------|-------------------------|-------------------------------------------|------------------------------------------|-------------------|
| 1     | F              | CH <sub>3</sub> | -449.1550042            | -448.979683                               | -448.967942                              | -449.016716       |
| 2     |                | NH <sub>2</sub> | -465.1971975            | -465.033361                               | -465.021793                              | -465.069908       |
| 3     |                | OH              | -485.0592993            | -484.908728                               | -484.897986                              | -484.943951       |
| 4     |                | F               | -509.0742144            | -508.936382                               | -508.925828                              | -508.971932       |
| 5     |                | CHO             | -523.1443502            | -522.988137                               | -522.975896                              | -523.026052       |
| 6     |                | CN              | -502.0764173            | -501.931075                               | -501.918895                              | -501.969386       |
| 7     |                | NO <sub>2</sub> | -614.2903628            | -614.141323                               | -614.128402                              | -614.181049       |

| Transition State, (Hartree) |                |                 |                         |                                           |                                          |                   |
|-----------------------------|----------------|-----------------|-------------------------|-------------------------------------------|------------------------------------------|-------------------|
| Entry                       | R <sub>1</sub> | R <sub>2</sub>  | Total Electronic Energy | Sum of Electronic and Zero-Point Energies | Sum of Electronic and Thermal Enthalpies | Gibbs Free Energy |
| 1                           | F              | CH <sub>3</sub> | -449.1318618            | -448.956284                               | -448.945969                              | -448.990326       |
| 2                           |                | NH <sub>2</sub> | -465.1724077            | -465.008003                               | -464.997956                              | -465.04158        |
| 3                           |                | OH              | -485.0344064            | -484.882988                               | -484.873092                              | -484.916553       |
| 4                           |                | F               | -509.0526317            | -508.913492                               | -508.903957                              | -508.94688        |
| 5                           |                | CHO             | -523.12487              | -522.967951                               | -522.957197                              | -523.003096       |
| 6                           |                | CN              | -502.0534381            | -501.907384                               | -501.896873                              | -501.942152       |
| 7                           |                | NO <sub>2</sub> | -614.2708742            | -614.120418                               | -614.109221                              | -614.156789       |

| Octatetraene [Starting Material], (Hartree) |                |                 |                         |                                           |                                          |                   |
|---------------------------------------------|----------------|-----------------|-------------------------|-------------------------------------------|------------------------------------------|-------------------|
| Entry                                       | R <sub>1</sub> | R <sub>2</sub>  | Total Electronic Energy | Sum of Electronic and Zero-Point Energies | Sum of Electronic and Thermal Enthalpies | Gibbs Free Energy |
| 1                                           | CHO            | CH <sub>3</sub> | -463.2252902            | -463.032681                               | -463.019634                              | -463.071868       |
| 2                                           |                | NH <sub>2</sub> | -479.267101             | -479.085741                               | -479.07293                               | -479.124223       |
| 3                                           |                | OH              | -479.098577             | -498.958495                               | -498.946629                              | -498.995625       |
| 4                                           |                | F               | -523.142685             | -522.986378                               | -522.974757                              | -523.023571       |
| 5                                           |                | CHO             | -537.2145804            | -537.040683                               | -537.027205                              | -537.08058        |
| 6                                           |                | CN              | -516.1444614            | -515.981105                               | -515.96784                               | -516.020823       |
| 7                                           |                | NO <sub>2</sub> | -628.3583319            | -628.191061                               | -628.17704                               | -628.232276       |

| Transition State, (Hartree) |                |                 |                         |                                           |                                          |                   |
|-----------------------------|----------------|-----------------|-------------------------|-------------------------------------------|------------------------------------------|-------------------|
| Entry                       | R <sub>1</sub> | R <sub>2</sub>  | Total Electronic Energy | Sum of Electronic and Zero-Point Energies | Sum of Electronic and Thermal Enthalpies | Gibbs Free Energy |
| 1                           | CHO            | CH <sub>3</sub> | -463.2062078            | -463.012861                               | -463.001316                              | -463.04876        |
| 2                           |                | NH <sub>2</sub> | -479.2459332            | -479.063417                               | -479.052266                              | -479.098577       |
| 3                           |                | OH              | -499.1082573            | -498.938658                               | -498.927651                              | -498.973768       |
| 4                           |                | F               | -523.126967             | -522.969845                               | -522.959182                              | -523.004796       |
| 5                           |                | CHO             | -537.1997629            | -537.024925                               | -537.013059                              | -537.061551       |
| 6                           |                | CN              | -516.1281377            | -515.964062                               | -515.952394                              | -516.000441       |
| 7                           |                | NO <sub>2</sub> | -628.3459022            | -628.17751                                | -628.165152                              | -628.21544        |

| Octatetraene [Starting Material], (Hartree) |                |                 |                         |                                           |                                          |                   |
|---------------------------------------------|----------------|-----------------|-------------------------|-------------------------------------------|------------------------------------------|-------------------|
| Entry                                       | R <sub>1</sub> | R <sub>2</sub>  | Total Electronic Energy | Sum of Electronic and Zero-Point Energies | Sum of Electronic and Thermal Enthalpies | Gibbs Free Energy |
| 1                                           | CN             | CH <sub>3</sub> | -442.1581609            | -441.975981                               | -441.963261                              | -442.014572       |
| 2                                           |                | NH <sub>2</sub> | -458.1997982            | -458.029239                               | -458.01668                               | -458.067203       |
| 3                                           |                | OH              | -478.0614445            | -477.903669                               | -477.891175                              | -477.942326       |
| 4                                           |                | F               | -502.076177             | -501.930975                               | -501.918733                              | -501.969626       |
| 5                                           |                | CHO             | 516.1466511             | -515.983904                               | -515.970597                              | -516.023454       |
| 6                                           |                | CN              | -495.077481             | -494.92552                                | -494.913223                              | -494.963119       |
| 7                                           |                | NO <sub>2</sub> | -607.2908224            | -607.135013                               | -607.121122                              | -607.175965       |

| Transition State, (Hartree) |                |                 |                         |                                           |                                          |                   |
|-----------------------------|----------------|-----------------|-------------------------|-------------------------------------------|------------------------------------------|-------------------|
| Entry                       | R <sub>1</sub> | R <sub>2</sub>  | Total Electronic Energy | Sum of Electronic and Zero-Point Energies | Sum of Electronic and Thermal Enthalpies | Gibbs Free Energy |
| 1                           | CN             | CH <sub>3</sub> | -442.1350792            | -441.9528                                 | -441.941398                              | -441.988549       |
| 2                           |                | NH <sub>2</sub> | -458.1749472            | -458.003584                               | -457.992577                              | -458.038521       |

|   |  |                 |              |             |             |             |
|---|--|-----------------|--------------|-------------|-------------|-------------|
| 3 |  | OH              | -478.0365116 | -477.878137 | -477.867254 | -477.9131   |
| 4 |  | F               | -502.0546841 | -501.90888  | -501.89832  | -501.943716 |
| 5 |  | CHO             | -516.1274613 | -515.963574 | -515.951862 | -516.000008 |
| 6 |  | CN              | -495.0548077 | -494.902111 | -494.890547 | -494.938364 |
| 7 |  | NO <sub>2</sub> | -607.2720824 | -607.114739 | -607.102543 | -607.152447 |

| Octatetraene [Starting Material], (Hartree) |                 |                 |                         |                                           |                                          |                   |
|---------------------------------------------|-----------------|-----------------|-------------------------|-------------------------------------------|------------------------------------------|-------------------|
| Entry                                       | R <sub>1</sub>  | R <sub>2</sub>  | Total Electronic Energy | Sum of Electronic and Zero-Point Energies | Sum of Electronic and Thermal Enthalpies | Gibbs Free Energy |
| 1                                           | NO <sub>2</sub> | CH <sub>3</sub> | -554.3697695            | -554.183733                               | -554.170206                              | -554.224666       |
| 2                                           |                 | NH <sub>2</sub> | -570.4113745            | -570.236065                               | -570.22288                               | -570.275476       |
| 3                                           |                 | OH              | -590.2725277            | -590.110371                               | -590.09715                               | -590.150325       |
| 4                                           |                 | F               | -614.2863036            | -614.137002                               | -614.125658                              | -614.174692       |
| 5                                           |                 | CHO             | -628.358535             | -628.191275                               | -628.177293                              | -628.232409       |
| 6                                           |                 | CN              | -607.2885706            | -607.132165                               | -607.118266                              | -607.173634       |
| 7                                           |                 | NO <sub>2</sub> | -719.5018264            | -719.34159                                | -719.326952                              | -719.384689       |

| Transition State, (Hartree) |                 |                 |                         |                                           |                                          |                   |
|-----------------------------|-----------------|-----------------|-------------------------|-------------------------------------------|------------------------------------------|-------------------|
| Entry                       | R <sub>1</sub>  | R <sub>2</sub>  | Total Electronic Energy | Sum of Electronic and Zero-Point Energies | Sum of Electronic and Thermal Enthalpies | Gibbs Free Energy |
| 1                           | NO <sub>2</sub> | CH <sub>3</sub> | -554.3530673            | -554.166456                               | -554.154315                              | -554.204301       |
| 2                           |                 | NH <sub>2</sub> | -570.3921636            | -570.216713                               | -570.204792                              | -570.254554       |
| 3                           |                 | OH              | -590.2539615            | -590.091842                               | -590.08085                               | -590.127539       |
| 4                           |                 | F               | -614.2721489            | -614.122113                               | -614.110799                              | -614.158999       |
| 5                           |                 | CHO             | -628.3454561            | -628.177222                               | -628.164796                              | -628.215423       |
| 6                           |                 | CN              | -607.2721246            | -607.115162                               | -607.102877                              | -607.15322        |
| 7                           |                 | NO <sub>2</sub> | -719.489381             | -719.32812                                | -719.315091                              | -719.368169       |

#### 4.15 3,6-substituted

| Octatetraene [Starting Material], (Hartree) |                 |                 |                         |                                           |                                          |                   |
|---------------------------------------------|-----------------|-----------------|-------------------------|-------------------------------------------|------------------------------------------|-------------------|
| Entry                                       | R <sub>1</sub>  | R <sub>2</sub>  | Total Electronic Energy | Sum of Electronic and Zero-Point Energies | Sum of Electronic and Thermal Enthalpies | Gibbs Free Energy |
| 1                                           | CH <sub>3</sub> | CH <sub>3</sub> | -389.2424341            | -389.031313                               | -389.019627                              | -389.067162       |
| 2                                           |                 | NH <sub>2</sub> | -405.2819463            | -405.081908                               | -405.06957                               | -405.119198       |
| 3                                           |                 | OH              | -425.1420007            | -424.954589                               | -424.942462                              | -424.991752       |
| 4                                           |                 | F               | -449.1595989            | -448.984745                               | -448.97284                               | -449.022318       |
| 5                                           |                 | CHO             | -463.2291932            | -463.036729                               | -463.023599                              | -463.075907       |
| 6                                           |                 | CN              | -442.1641087            | -441.982913                               | -441.970721                              | -442.020438       |
| 7                                           |                 | NO <sub>2</sub> | -441.943901             | -441.943901                               | -554.176406                              | -554.231507       |

| Transition State, (Hartree) |                 |                 |                         |                                           |                                          |                   |
|-----------------------------|-----------------|-----------------|-------------------------|-------------------------------------------|------------------------------------------|-------------------|
| Entry                       | R <sub>1</sub>  | R <sub>2</sub>  | Total Electronic Energy | Sum of Electronic and Zero-Point Energies | Sum of Electronic and Thermal Enthalpies | Gibbs Free Energy |
| 1                           | CH <sub>3</sub> | CH <sub>3</sub> | -389.21259              | -389.0013                                 | -388.989768                              | -389.037771       |
| 2                           |                 | NH <sub>2</sub> | -405.2519219            | -405.051443                               | -405.040286                              | -405.087436       |
| 3                           |                 | OH              | -425.1139195            | -424.926349                               | -424.916287                              | -424.959953       |
| 4                           |                 | F               | -449.1328828            | -448.957612                               | -448.947082                              | -448.947082       |
| 5                           |                 | CHO             | -463.2074393            | -463.014399                               | -463.002799                              | -463.050325       |
| 6                           |                 | CN              | -442.020438             | -441.95535                                | -441.943901                              | -441.943901       |
| 7                           |                 | NO <sub>2</sub> | -554.3557316            | -554.169175                               | -554.15703                               | -554.206881       |

| Octatetraene [Starting Material], (Hartree) |                 |                 |                         |                                           |                                          |                   |
|---------------------------------------------|-----------------|-----------------|-------------------------|-------------------------------------------|------------------------------------------|-------------------|
| Entry                                       | R <sub>1</sub>  | R <sub>2</sub>  | Total Electronic Energy | Sum of Electronic and Zero-Point Energies | Sum of Electronic and Thermal Enthalpies | Gibbs Free Energy |
| 1                                           | NH <sub>2</sub> | NH <sub>2</sub> | -421.3195316            | -421.3195316                              | -421.118251                              | -421.16726        |
| 2                                           |                 | OH              | -441.180455             | -441.004039                               | -440.992162                              | -441.040803       |
| 3                                           |                 | F               | -465.1986577            | -465.034848                               | -465.023192                              | -465.0716         |



|   |  |                 |              |              |             |             |
|---|--|-----------------|--------------|--------------|-------------|-------------|
| 4 |  | CHO             | -479.2722957 | -479.090384  | -479.077677 | -479.128469 |
| 5 |  | CN              | -458.2066601 | -458.2066601 | -458.023439 | -458.074106 |
| 6 |  | NO <sub>2</sub> | -570.4203038 | -570.245065  | -570.231691 | -570.285717 |

| Transition State, (Hartree) |                 |                 |                         |                                           |                                          |                   |
|-----------------------------|-----------------|-----------------|-------------------------|-------------------------------------------|------------------------------------------|-------------------|
| Entry                       | R <sub>1</sub>  | R <sub>2</sub>  | Total Electronic Energy | Sum of Electronic and Zero-Point Energies | Sum of Electronic and Thermal Enthalpies | Gibbs Free Energy |
| 1                           | NH <sub>2</sub> | NH <sub>2</sub> | -421.2897991            | -421.100097                               | -421.089423                              | -421.134077       |
| 2                           |                 | OH              | -441.1523724            | -440.975592                               | -440.965084                              | -441.009482       |
| 3                           |                 | F               | -465.1720494            | -465.007577                               | -464.997489                              | -464.997489       |
| 4                           |                 | CHO             | -479.2501352            | -479.06791                                | -479.056697                              | -479.103098       |
| 5                           |                 | CN              | -458.1794341            | -458.1794341                              | -457.996973                              | -458.043023       |
| 6                           |                 | NO <sub>2</sub> | -570.3984288            | -570.222644                               | -570.2109                                | -570.259389       |

| Octatetraene [Starting Material], (Hartree) |                |                 |                         |                                           |                                          |                   |
|---------------------------------------------|----------------|-----------------|-------------------------|-------------------------------------------|------------------------------------------|-------------------|
| Entry                                       | R <sub>1</sub> | R <sub>2</sub>  | Total Electronic Energy | Sum of Electronic and Zero-Point Energies | Sum of Electronic and Thermal Enthalpies | Gibbs Free Energy |
| 1                                           | OH             | OH              | -461.0423575            | -460.878711                               | -460.866991                              | -460.915391       |
| 2                                           |                | F               | -485.0587299            | -484.907577                               | -484.896124                              | -484.944225       |
| 3                                           |                | CHO             | -499.1304208            | -498.961168                               | -498.948655                              | -498.999221       |
| 4                                           |                | CN              | -478.0648435            | -477.906777                               | -477.894412                              | -477.94472        |
| 5                                           |                | NO <sub>2</sub> | -590.2775136            | -590.114837                               | -590.101741                              | -590.154922       |

| Transition State, (Hartree) |                |                 |                         |                                           |                                          |                   |
|-----------------------------|----------------|-----------------|-------------------------|-------------------------------------------|------------------------------------------|-------------------|
| Entry                       | R <sub>1</sub> | R <sub>2</sub>  | Total Electronic Energy | Sum of Electronic and Zero-Point Energies | Sum of Electronic and Thermal Enthalpies | Gibbs Free Energy |
| 1                           | OH             | OH              | -461.0148188            | -460.850728                               | -460.84046                               | -460.884426       |
| 2                           |                | F               | -485.0335727            | -484.881979                               | -484.872033                              | -484.915576       |
| 3                           |                | CHO             | -499.1099748            | -498.940541                               | -498.929511                              | -498.975681       |
| 4                           |                | CN              | -478.0395339            | -477.88097                                | -477.87014                               | -477.915883       |
| 5                           |                | NO <sub>2</sub> | -590.2580004            | -590.095106                               | -590.083547                              | -590.131894       |

| Octatetraene [Starting Material], (Hartree) |                |                 |                         |                                           |                                          |                   |
|---------------------------------------------|----------------|-----------------|-------------------------|-------------------------------------------|------------------------------------------|-------------------|
| Entry                                       | R <sub>1</sub> | R <sub>2</sub>  | Total Electronic Energy | Sum of Electronic and Zero-Point Energies | Sum of Electronic and Thermal Enthalpies | Gibbs Free Energy |
| 1                                           | F              | F               | -509.0758922            | -508.937341                               | -508.926103                              | -508.974205       |
| 2                                           |                | CHO             | 523.1454558             | -522.989525                               | -522.977752                              | -523.027403       |
| 3                                           |                | CN              | -523.004682             | -501.935359                               | -501.923933                              | -501.972004       |
| 4                                           |                | NO <sub>2</sub> | -614.292233             | -614.14278                                | -614.131467                              | -614.180245       |

| Transition State, (Hartree) |                |                 |                         |                                           |                                          |                   |
|-----------------------------|----------------|-----------------|-------------------------|-------------------------------------------|------------------------------------------|-------------------|
| Entry                       | R <sub>1</sub> | R <sub>2</sub>  | Total Electronic Energy | Sum of Electronic and Zero-Point Energies | Sum of Electronic and Thermal Enthalpies | Gibbs Free Energy |
| 1                           | F              | F               | -509.0520463            | -508.912745                               | -508.903218                              | -508.946107       |
| 2                           |                | CHO             | -523.1267016            | -522.969711                               | -522.959024                              | -523.004682       |
| 3                           |                | CN              | -502.0560783            | -501.910013                               | -501.899502                              | -501.944764       |
| 4                           |                | NO <sub>2</sub> | -614.2741091            | -614.123623                               | -614.112393                              | -614.16035        |

| Octatetraene [Starting Material], (Hartree) |                |                 |                         |                                           |                                          |                   |
|---------------------------------------------|----------------|-----------------|-------------------------|-------------------------------------------|------------------------------------------|-------------------|
| Entry                                       | R <sub>1</sub> | R <sub>2</sub>  | Total Electronic Energy | Sum of Electronic and Zero-Point Energies | Sum of Electronic and Thermal Enthalpies | Gibbs Free Energy |
| 1                                           | CHO            | CHO             | -537.2140259            | -537.040079                               | -537.026441                              | -537.080621       |
| 2                                           |                | CN              | -516.148552             | -515.985994                               | -515.973224                              | -516.025688       |
| 3                                           |                | NO <sub>2</sub> | -628.3588034            | -628.191547                               | -628.178947                              | -628.231574       |

| Transition State, (Hartree) |                |                |                         |                                           |                                          |                   |
|-----------------------------|----------------|----------------|-------------------------|-------------------------------------------|------------------------------------------|-------------------|
| Entry                       | R <sub>1</sub> | R <sub>2</sub> | Total Electronic Energy | Sum of Electronic and Zero-Point Energies | Sum of Electronic and Thermal Enthalpies | Gibbs Free Energy |
| 1                           | CHO            | CHO            | -537.1995623            | -537.024783                               | -537.012868                              | -537.06156        |

|   |  |                 |              |             |             |             |
|---|--|-----------------|--------------|-------------|-------------|-------------|
| 2 |  | CN              | -516.129173  | -515.965281 | -515.953581 | -516.001721 |
| 3 |  | NO <sub>2</sub> | -628.3464943 | -628.178324 | -628.165881 | -628.216734 |

| Octatetraene [Starting Material], (Hartree) |                |                 |                         |                                           |                                          |                   |
|---------------------------------------------|----------------|-----------------|-------------------------|-------------------------------------------|------------------------------------------|-------------------|
| Entry                                       | R <sub>1</sub> | R <sub>2</sub>  | Total Electronic Energy | Sum of Electronic and Zero-Point Energies | Sum of Electronic and Thermal Enthalpies | Gibbs Free Energy |
| 1                                           | CN             | CN              | -495.0811098            | -494.929653                               | -494.929653                              | -494.968263       |
| 2                                           |                | NO <sub>2</sub> | -607.2918608            | -607.135481                               | -607.121521                              | -607.177169       |

| Transition State, (Hartree) |                |                 |                         |                                           |                                          |                   |
|-----------------------------|----------------|-----------------|-------------------------|-------------------------------------------|------------------------------------------|-------------------|
| Entry                       | R <sub>1</sub> | R <sub>2</sub>  | Total Electronic Energy | Sum of Electronic and Zero-Point Energies | Sum of Electronic and Thermal Enthalpies | Gibbs Free Energy |
| 1                           | CN             | CN              | -495.0568517            | -494.904078                               | -494.892496                              | -494.940363       |
| 2                           |                | NO <sub>2</sub> | -607.2741732            | -607.116968                               | -607.104698                              | -607.15492        |

| Octatetraene [Starting Material], (Hartree) |                 |                 |                         |                                           |                                          |                   |
|---------------------------------------------|-----------------|-----------------|-------------------------|-------------------------------------------|------------------------------------------|-------------------|
| Entry                                       | R <sub>1</sub>  | R <sub>2</sub>  | Total Electronic Energy | Sum of Electronic and Zero-Point Energies | Sum of Electronic and Thermal Enthalpies | Gibbs Free Energy |
| 1                                           | NO <sub>2</sub> | NO <sub>2</sub> | -719.502376             | -719.341433                               | -719.326855                              | -719.384247       |

| Transition State, (Hartree) |                 |                 |                         |                                           |                                          |                   |
|-----------------------------|-----------------|-----------------|-------------------------|-------------------------------------------|------------------------------------------|-------------------|
| Entry                       | R <sub>1</sub>  | R <sub>2</sub>  | Total Electronic Energy | Sum of Electronic and Zero-Point Energies | Sum of Electronic and Thermal Enthalpies | Gibbs Free Energy |
| 1                           | NO <sub>2</sub> | NO <sub>2</sub> | -719.4911568            | -719.329491                               | -719.316527                              | -719.369035       |

#### 4.16 4,5-substituted

| Octatetraene [Starting Material], (Hartree) |                 |                 |                         |                                           |                                          |                   |
|---------------------------------------------|-----------------|-----------------|-------------------------|-------------------------------------------|------------------------------------------|-------------------|
| Entry                                       | R <sub>1</sub>  | R <sub>2</sub>  | Total Electronic Energy | Sum of Electronic and Zero-Point Energies | Sum of Electronic and Thermal Enthalpies | Gibbs Free Energy |
| 1                                           | CH <sub>3</sub> | CH <sub>3</sub> | -389.2399373            | -389.029967                               | -389.01716                               | -389.067496       |
| 2                                           |                 | NH <sub>2</sub> | -405.2787205            | -405.079607                               | -405.066947                              | -405.117126       |
| 3                                           |                 | OH              | -425.141553             | -424.954569                               | -424.942405                              | -424.991267       |
| 4                                           |                 | F               | -449.1517077            | -448.976784                               | -448.96493                               | -449.013953       |
| 5                                           |                 | CHO             | -463.2271263            | -463.035302                               | -463.022071                              | -463.074303       |
| 6                                           |                 | CN              | -442.1614981            | -441.980078                               | -441.967278                              | -442.01796        |
| 7                                           |                 | NO <sub>2</sub> | -554.3780859            | -554.192788                               | -554.17914                               | -554.232457       |

| Transition State, (Hartree) |                 |                 |                         |                                           |                                          |                   |
|-----------------------------|-----------------|-----------------|-------------------------|-------------------------------------------|------------------------------------------|-------------------|
| Entry                       | R <sub>1</sub>  | R <sub>2</sub>  | Total Electronic Energy | Sum of Electronic and Zero-Point Energies | Sum of Electronic and Thermal Enthalpies | Gibbs Free Energy |
| 1                           | CH <sub>3</sub> | CH <sub>3</sub> | -389.2052727            | -388.992666                               | -388.981884                              | -389.026939       |
| 2                           |                 | NH <sub>2</sub> | -405.2472557            | -405.045793                               | -405.035256                              | -405.079627       |
| 3                           |                 | OH              | -425.1111933            | -424.92272                                | -424.912305                              | -424.956529       |
| 4                           |                 | F               | -449.1312451            | -448.955476                               | -448.945298                              | -448.989242       |
| 5                           |                 | CHO             | -463.1963652            | -463.002455                               | -462.991207                              | -463.03779        |
| 6                           |                 | CN              | -442.1328457            | -441.950321                               | -441.939165                              | -441.985434       |
| 7                           |                 | NO <sub>2</sub> | -554.3457745            | -554.158504                               | -554.146733                              | -554.194815       |

| Octatetraene [Starting Material], (Hartree) |                 |                 |                         |                                           |                                          |                   |
|---------------------------------------------|-----------------|-----------------|-------------------------|-------------------------------------------|------------------------------------------|-------------------|
| Entry                                       | R <sub>1</sub>  | R <sub>2</sub>  | Total Electronic Energy | Sum of Electronic and Zero-Point Energies | Sum of Electronic and Thermal Enthalpies | Gibbs Free Energy |
| 1                                           | NH <sub>2</sub> | NH <sub>2</sub> | -421.3187757            | -421.130363                               | -421.118083                              | -421.167227       |
| 2                                           |                 | OH              | -441.1774558            | -441.001877                               | -440.989819                              | -441.038921       |
| 3                                           |                 | F               | -465.192871             | -465.029477                               | -465.017785                              | -465.066065       |
| 4                                           |                 | CHO             | -479.2687517            | -479.08748                                | -479.074661                              | -479.125555       |
| 5                                           |                 | CN              | -458.1982587            | -458.027995                               | -458.015288                              | -458.066232       |
| 6                                           |                 | NO <sub>2</sub> | -570.4171248            | -570.242511                               | -570.229171                              | -570.281645       |

| Transition State, (Hartree) |                 |                 |                         |                                           |                                          |                   |
|-----------------------------|-----------------|-----------------|-------------------------|-------------------------------------------|------------------------------------------|-------------------|
| Entry                       | R <sub>1</sub>  | R <sub>2</sub>  | Total Electronic Energy | Sum of Electronic and Zero-Point Energies | Sum of Electronic and Thermal Enthalpies | Gibbs Free Energy |
| 1                           | NH <sub>2</sub> | NH <sub>2</sub> | -421.2913128            | -421.100309                               | -421.090132                              | -421.133766       |
| 2                           |                 | OH              | -441.1496878            | -440.972534                               | -440.962214                              | -441.006202       |
| 3                           |                 | F               | -465.1688496            | -465.004499                               | -464.994422                              | -465.038095       |
| 4                           |                 | CHO             | -479.2416248            | -479.058988                               | -479.047934                              | -479.09402        |
| 5                           |                 | CN              | -458.1734714            | -458.002376                               | -457.991274                              | -458.037331       |
| 6                           |                 | NO <sub>2</sub> | -570.3843906            | -570.209134                               | -570.197262                              | -570.245823       |

| Octatetraene [Starting Material], (Hartree) |                |                 |                         |                                           |                                          |                   |
|---------------------------------------------|----------------|-----------------|-------------------------|-------------------------------------------|------------------------------------------|-------------------|
| Entry                                       | R <sub>1</sub> | R <sub>2</sub>  | Total Electronic Energy | Sum of Electronic and Zero-Point Energies | Sum of Electronic and Thermal Enthalpies | Gibbs Free Energy |
| 1                                           | OH             | OH              | -461.0364719            | -461.0364719                              | -460.861115                              | -460.909432       |
| 2                                           |                | F               | -485.0526024            | -484.901617                               | -484.890108                              | -484.938359       |
| 3                                           |                | CHO             | -499.1279077            | -498.9592                                 | -498.946624                              | -498.997275       |
| 4                                           |                | CN              | -478.0572434            | -477.899501                               | -477.887074                              | -477.937479       |
| 5                                           |                | NO <sub>2</sub> | -590.2747836            | -590.113189                               | -590.100012                              | -590.15209        |

| Transition State, (Hartree) |                |                 |                         |                                           |                                          |                   |
|-----------------------------|----------------|-----------------|-------------------------|-------------------------------------------|------------------------------------------|-------------------|
| Entry                       | R <sub>1</sub> | R <sub>2</sub>  | Total Electronic Energy | Sum of Electronic and Zero-Point Energies | Sum of Electronic and Thermal Enthalpies | Gibbs Free Energy |
| 1                           | OH             | OH              | -461.0063536            | -460.84226                                | -460.832001                              | -460.875972       |
| 2                           |                | F               | -485.0263932            | -484.874787                               | -484.864875                              | -484.908336       |
| 3                           |                | CHO             | -499.1029856            | -498.933181                               | -498.922245                              | -498.968262       |
| 4                           |                | CN              | -477.937479             | -477.874533                               | -477.863689                              | -477.909361       |
| 5                           |                | NO <sub>2</sub> | -590.250183             | -590.087131                               | -590.075767                              | -590.123287       |

| Octatetraene [Starting Material], (Hartree) |                |                 |                         |                                           |                                          |                   |
|---------------------------------------------|----------------|-----------------|-------------------------|-------------------------------------------|------------------------------------------|-------------------|
| Entry                                       | R <sub>1</sub> | R <sub>2</sub>  | Total Electronic Energy | Sum of Electronic and Zero-Point Energies | Sum of Electronic and Thermal Enthalpies | Gibbs Free Energy |
| 1                                           | F              | F               | -509.0678593            | -508.929716                               | -508.919322                              | -508.964322       |
| 2                                           |                | CHO             | -523.1424684            | -522.986285                               | -522.973918                              | -523.024334       |
| 3                                           |                | CN              | -502.0719345            | -501.926826                               | -501.914611                              | -501.965098       |
| 4                                           |                | NO <sub>2</sub> | -614.2855167            | -614.136466                               | -614.123471                              | -614.176113       |

| Transition State, (Hartree) |                |                 |                         |                                           |                                          |                   |
|-----------------------------|----------------|-----------------|-------------------------|-------------------------------------------|------------------------------------------|-------------------|
| Entry                       | R <sub>1</sub> | R <sub>2</sub>  | Total Electronic Energy | Sum of Electronic and Zero-Point Energies | Sum of Electronic and Thermal Enthalpies | Gibbs Free Energy |
| 1                           | F              | F               | -509.0448482            | -508.90576                                | -508.896217                              | -508.939123       |
| 2                           |                | CHO             | -523.1207892            | -522.963601                               | -522.952919                              | -522.998613       |
| 3                           |                | CN              | -502.0500514            | -501.904283                               | -501.893723                              | -501.939061       |
| 4                           |                | NO <sub>2</sub> | -614.2610273            | -614.110395                               | -614.09926                               | -614.14629        |

| Octatetraene [Starting Material], (Hartree) |                |                 |                         |                                           |                                          |                   |
|---------------------------------------------|----------------|-----------------|-------------------------|-------------------------------------------|------------------------------------------|-------------------|
| Entry                                       | R <sub>1</sub> | R <sub>2</sub>  | Total Electronic Energy | Sum of Electronic and Zero-Point Energies | Sum of Electronic and Thermal Enthalpies | Gibbs Free Energy |
| 1                                           | CHO            | CHO             | -537.2165937            | -537.04265                                | -537.029211                              | -537.082036       |
| 2                                           |                | CN              | -516.1469532            | -515.98406                                | -515.970764                              | -516.023375       |
| 3                                           |                | NO <sub>2</sub> | -628.3631508            | -628.196541                               | -628.182376                              | -628.237768       |

| Transition State, (Hartree) |                |                 |                         |                                           |                                          |                   |
|-----------------------------|----------------|-----------------|-------------------------|-------------------------------------------|------------------------------------------|-------------------|
| Entry                       | R <sub>1</sub> | R <sub>2</sub>  | Total Electronic Energy | Sum of Electronic and Zero-Point Energies | Sum of Electronic and Thermal Enthalpies | Gibbs Free Energy |
| 1                           | CHO            | CHO             | -537.1872469            | -537.012052                               | -537.000414                              | -537.048407       |
| 2                           |                | CN              | -516.1209691            | -515.956943                               | -515.945276                              | -515.993335       |
| 3                           |                | NO <sub>2</sub> | -628.3356146            | -628.166912                               | -628.154769                              | -628.204223       |

| Octatetraene [Starting Material], (Hartree) |                |                 |                         |                                           |                                          |                   |
|---------------------------------------------|----------------|-----------------|-------------------------|-------------------------------------------|------------------------------------------|-------------------|
| Entry                                       | R <sub>1</sub> | R <sub>2</sub>  | Total Electronic Energy | Sum of Electronic and Zero-Point Energies | Sum of Electronic and Thermal Enthalpies | Gibbs Free Energy |
| 1                                           | CN             | CN              | -495.0762411            | -494.924658                               | -494.91144                               | -494.964011       |
| 2                                           |                | NO <sub>2</sub> | -607.2919237            | -607.136031                               | -607.122142                              | -607.176773       |

| Transition State, (Hartree) |                |                 |                         |                                           |                                          |                   |
|-----------------------------|----------------|-----------------|-------------------------|-------------------------------------------|------------------------------------------|-------------------|
| Entry                       | R <sub>1</sub> | R <sub>2</sub>  | Total Electronic Energy | Sum of Electronic and Zero-Point Energies | Sum of Electronic and Thermal Enthalpies | Gibbs Free Energy |
| 1                           | CN             | CN              | -495.0487601            | -494.895916                               | -494.884412                              | -494.931966       |
| 2                           |                | NO <sub>2</sub> | -607.2613104            | -607.104013                               | -607.091874                              | -607.141298       |

| Octatetraene [Starting Material], (Hartree) |                 |                 |                         |                                           |                                          |                   |
|---------------------------------------------|-----------------|-----------------|-------------------------|-------------------------------------------|------------------------------------------|-------------------|
| Entry                                       | R <sub>1</sub>  | R <sub>2</sub>  | Total Electronic Energy | Sum of Electronic and Zero-Point Energies | Sum of Electronic and Thermal Enthalpies | Gibbs Free Energy |
| 1                                           | NO <sub>2</sub> | NO <sub>2</sub> | -719.5090484            | -719.348708                               | -719.334053                              | -719.391457       |

| Transition State, (Hartree) |                 |                 |                         |                                           |                                          |                   |
|-----------------------------|-----------------|-----------------|-------------------------|-------------------------------------------|------------------------------------------|-------------------|
| Entry                       | R <sub>1</sub>  | R <sub>2</sub>  | Total Electronic Energy | Sum of Electronic and Zero-Point Energies | Sum of Electronic and Thermal Enthalpies | Gibbs Free Energy |
| 1                           | NO <sub>2</sub> | NO <sub>2</sub> | -719.4777951            | -719.316                                  | -719.303326                              | -719.354013       |

## 5. Cartesian coordinates of transition structure

### 5.1 Octatetraene

#### 5.1.1 Helical-shaped transition structure

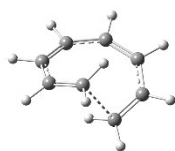

|   |             |             |             |
|---|-------------|-------------|-------------|
| C | -0.83559000 | -1.37784400 | 0.82000500  |
| C | 0.83559600  | -1.37784300 | -0.82000400 |
| C | -1.78726700 | -0.71310400 | 0.09239200  |
| C | -1.72497800 | 0.65723400  | -0.25826200 |
| C | -0.69478900 | 1.57852500  | -0.16776800 |
| C | 0.69478200  | 1.57852800  | 0.16776800  |
| C | 1.72497500  | 0.65724000  | 0.25826100  |
| C | 1.78727100  | -0.71309700 | -0.09239300 |
| H | -0.13724200 | -0.82116900 | 1.43098600  |
| H | -0.96179200 | -2.42976200 | 1.06058700  |
| H | 0.13724500  | -0.82117300 | -1.43098500 |
| H | 0.96180200  | -2.42976100 | -1.06058400 |
| H | -2.63006900 | -1.27760300 | -0.30416600 |
| H | -2.64951600 | 1.06723700  | -0.66219700 |
| H | -1.03654300 | 2.59237100  | -0.37775800 |
| H | 1.03653300  | 2.59237400  | 0.37775800  |
| H | 2.64951100  | 1.06724700  | 0.66219800  |
| H | 2.63007600  | -1.27759200 | 0.30416500  |

#### 5.1.2 Boat-shaped transition structure

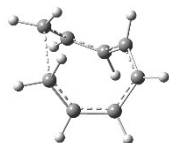

|   |             |             |             |
|---|-------------|-------------|-------------|
| C | -0.14741900 | 1.64434700  | -0.45688300 |
| C | -1.73137400 | -0.55895700 | 0.59864700  |
| C | -0.49967300 | -1.20241800 | 0.60895400  |
| C | 0.34554000  | -1.37215400 | -0.51860200 |
| C | 1.63329600  | -0.85266700 | -0.44329600 |
| C | 1.81231200  | 0.30048000  | 0.34541800  |
| C | 0.85915300  | 1.34378800  | 0.45689400  |
| C | -2.04364100 | 0.29707800  | -0.44910700 |
| H | -0.03660300 | 1.24566600  | -1.45945400 |
| H | -0.66195900 | 2.59517100  | -0.36550600 |
| H | -2.26274100 | -0.44831100 | 1.54152400  |
| H | -0.03300300 | -1.35534000 | 1.58135000  |
| H | -0.02161100 | -1.88367900 | -1.41034100 |
| H | 2.47381400  | -1.28437700 | -0.98751400 |
| H | 2.78696200  | 0.49218600  | 0.79829400  |
| H | 0.99302600  | 2.03236700  | 1.29172500  |
| H | -1.68440600 | 0.07503500  | -1.44780400 |
| H | -2.92263800 | 0.93429700  | -0.39443000 |

## 5.2

### Monosubstituted

#### 5.2.1 1-substituted (outward)

##### 1-CH<sub>3</sub>-substituted

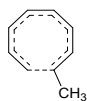

|   |             |             |             |
|---|-------------|-------------|-------------|
| C | 0.28515000  | -1.20853900 | 1.11350100  |
| C | -0.55571000 | -1.84744900 | 0.23635600  |
| C | -1.67035100 | -1.23661200 | -0.38094200 |
| C | -2.06480300 | 0.09311200  | -0.42137600 |
| C | -1.53154400 | 1.35711500  | -0.02940900 |
| C | -0.28874000 | 1.89000400  | 0.28494600  |
| C | 1.01007300  | 1.34348600  | 0.20235600  |
| C | 1.33027600  | 0.16067100  | -0.42404900 |
| H | -0.05861900 | -0.32246700 | 1.63080800  |
| H | 1.12004000  | -1.73970500 | 1.56371800  |
| H | -0.32439900 | -2.86795500 | -0.06601400 |
| H | -2.34181700 | -1.91670300 | -0.90315100 |
| H | -3.06649300 | 0.20994700  | -0.83584700 |
| H | -2.31599000 | 2.11399300  | -0.00396100 |
| H | -0.32919400 | 2.91485800  | 0.65130000  |
| H | 1.80271700  | 1.87950400  | 0.72621700  |
| H | 0.61881900  | -0.22309300 | -1.14739000 |
| C | 2.74454500  | -0.33130500 | -0.55268200 |
| H | 3.36339300  | 0.01459800  | 0.28118500  |
| H | 2.78567900  | -1.42437400 | -0.58531700 |
| H | 3.19249000  | 0.03849800  | -1.48376300 |

##### 1-NH<sub>2</sub>-substituted

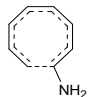

|   |             |             |             |
|---|-------------|-------------|-------------|
| C | 0.28233400  | -1.13724500 | 1.10359500  |
| C | -0.59184700 | -1.81367400 | 0.26802700  |
| C | -1.68634900 | -1.21017300 | -0.36339900 |
| C | -2.06083700 | 0.13814500  | -0.40431100 |
| C | -1.48787300 | 1.37741100  | -0.04345700 |
| C | -0.21071000 | 1.86709800  | 0.26608800  |
| C | 1.05743800  | 1.29840600  | 0.16988800  |
| C | 1.34532700  | 0.05643700  | -0.40705400 |
| N | 2.64817500  | -0.41785300 | -0.50466300 |
| H | -0.08302700 | -0.26671600 | 1.63360500  |
| H | 1.11648200  | -1.66456500 | 1.55810400  |
| H | -0.37268500 | -2.84772200 | 0.00344900  |
| H | -2.36452500 | -1.88189800 | -0.88729000 |
| H | -3.06958700 | 0.27129200  | -0.79682600 |
| H | -2.23319700 | 2.17263800  | -0.04592400 |
| H | -0.21306600 | 2.89579500  | 0.62274400  |
| H | 1.88551100  | 1.84582700  | 0.62180200  |
| H | 0.65642200  | -0.32994000 | -1.14750400 |
| H | 2.87323900  | -0.95254800 | -1.33132400 |
| H | 3.38231300  | 0.22437200  | -0.23445800 |

#### 1-OH-substituted

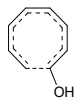

|   |             |             |             |
|---|-------------|-------------|-------------|
| C | 0.26951600  | -1.20154400 | 1.08227300  |
| C | -0.62940200 | -1.81222800 | 0.23354600  |
| C | -1.72002100 | -1.15538700 | -0.36364800 |
| C | -2.05157600 | 0.19773600  | -0.37756400 |
| C | -1.43592000 | 1.41750700  | 0.00359200  |
| C | -0.14492500 | 1.86633600  | 0.28098900  |
| C | 1.11158700  | 1.26165200  | 0.14582500  |
| C | 1.34989400  | 0.03368100  | -0.45312800 |
| H | -0.03797900 | -0.31747500 | 1.62635300  |
| H | 1.08945800  | -1.77502300 | 1.50710400  |
| H | -0.44599400 | -2.84204100 | -0.06992300 |
| H | -2.42853900 | -1.79741400 | -0.88430100 |
| H | -3.05879500 | 0.37042200  | -0.75797600 |
| H | -2.16294900 | 2.22807400  | 0.04701200  |
| H | -0.10647700 | 2.88950100  | 0.65052800  |
| H | 1.96254900  | 1.77547900  | 0.59594400  |
| H | 0.67199500  | -0.35856300 | -1.19809300 |
| O | 2.60043100  | -0.47651200 | -0.60105100 |
| H | 3.21835700  | -0.00738000 | -0.01954200 |

#### 1-F-substituted

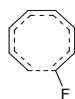

|   |            |             |            |
|---|------------|-------------|------------|
| C | 0.23963700 | -1.26478700 | 1.08133300 |
|---|------------|-------------|------------|

|   |             |             |             |
|---|-------------|-------------|-------------|
| C | -0.66985900 | -1.81893700 | 0.21601800  |
| C | -1.74096300 | -1.11122500 | -0.37408400 |
| C | -2.02893800 | 0.24584700  | -0.38358700 |
| C | -1.38704800 | 1.45213700  | 0.02376800  |
| C | -0.09478000 | 1.87536800  | 0.29814500  |
| C | 1.15713800  | 1.24187100  | 0.15639700  |
| C | 1.35096600  | 0.03621500  | -0.46038900 |
| H | -0.01674100 | -0.36228100 | 1.62146600  |
| H | 1.04865600  | -1.86494100 | 1.48926900  |
| H | -0.52480900 | -2.84835400 | -0.10829100 |
| H | -2.47085500 | -1.72588300 | -0.89840600 |
| H | -3.02445300 | 0.45145300  | -0.77769000 |
| H | -2.10402200 | 2.27016100  | 0.08988800  |
| H | -0.03418800 | 2.89406300  | 0.67576500  |
| H | 2.02686800  | 1.70389800  | 0.61818900  |
| H | 0.69830200  | -0.37606900 | -1.21698200 |
| F | 2.60492500  | -0.45344200 | -0.53764600 |

#### 1-CHO-substituted

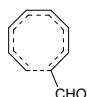

|   |             |             |             |
|---|-------------|-------------|-------------|
| C | 0.20481300  | -1.02997900 | 1.25575300  |
| C | -0.41881300 | -1.86875800 | 0.36250300  |
| C | -1.59120700 | -1.54751800 | -0.35030700 |
| C | -2.27413000 | -0.34621100 | -0.51002200 |
| C | -2.07880500 | 1.02626000  | -0.19301200 |
| C | -1.02683300 | 1.86008700  | 0.17669900  |
| C | 0.35454400  | 1.61651800  | 0.23706800  |
| C | 0.98398200  | 0.49480100  | -0.26603700 |
| H | -0.35013800 | -0.21852000 | 1.70977200  |
| H | 1.09957000  | -1.35913300 | 1.77773300  |
| H | 0.04890700  | -2.82397900 | 0.13244500  |
| H | -2.05550800 | -2.38565000 | -0.86763000 |
| H | -3.24229800 | -0.49322800 | -0.98822000 |
| H | -3.01405100 | 1.57778800  | -0.29099200 |
| H | -1.33453600 | 2.86537700  | 0.45821000  |
| H | 0.96224600  | 2.34501200  | 0.77625100  |
| H | 0.51141600  | -0.09324800 | -1.04343400 |
| C | 2.44559500  | 0.35497600  | -0.13496900 |
| H | 2.92811000  | 1.07391000  | 0.56192100  |
| O | 3.10642500  | -0.48117400 | -0.71151400 |

#### 1-CN-substituted

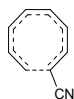

|   |             |             |             |
|---|-------------|-------------|-------------|
| C | 0.15496400  | -1.17862800 | 1.13047100  |
| C | -0.61079800 | -1.89215500 | 0.24010400  |
| C | -1.76119600 | -1.38646800 | -0.39878900 |
| C | -2.28735800 | -0.10056500 | -0.45795100 |
| C | -1.90110200 | 1.21335400  | -0.07209300 |
| C | -0.73412800 | 1.88892300  | 0.27190600  |
| C | 0.61344800  | 1.49376100  | 0.22791600  |
| C | 1.05900900  | 0.32568600  | -0.36041400 |

|   |             |             |             |
|---|-------------|-------------|-------------|
| H | -0.27306100 | -0.32158100 | 1.63559400  |
| H | 1.03172200  | -1.62784900 | 1.58863600  |
| H | -0.28540000 | -2.88914100 | -0.05072400 |
| H | -2.35260500 | -2.12761300 | -0.93406200 |
| H | -3.28681700 | -0.09248500 | -0.89242600 |
| H | -2.76230300 | 1.88130500  | -0.07973400 |
| H | -0.89812400 | 2.90580300  | 0.62252700  |
| H | 1.33870800  | 2.12328400  | 0.73894800  |
| H | 0.45445300  | -0.15547600 | -1.11844000 |
| C | 2.45905800  | 0.00727200  | -0.38289300 |
| N | 3.58315100  | -0.27476000 | -0.38569600 |

#### 1-NO<sub>2</sub>-substituted

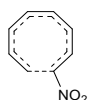

|   |             |             |             |
|---|-------------|-------------|-------------|
| C | -0.18811400 | -1.07741400 | 1.28288900  |
| C | -0.93971000 | -1.84892400 | 0.43720300  |
| C | -2.07987000 | -1.39000300 | -0.26289500 |
| C | -2.59380700 | -0.11536900 | -0.45032000 |
| C | -2.20707800 | 1.23071400  | -0.17755700 |
| C | -1.04243400 | 1.93033400  | 0.10624800  |
| C | 0.30436200  | 1.51768800  | 0.12177700  |
| C | 0.72693900  | 0.30553500  | -0.34921600 |
| N | 2.14078400  | -0.03557800 | -0.27819000 |
| H | -0.60257300 | -0.16837100 | 1.70119600  |
| H | 0.68498500  | -1.49071000 | 1.78174800  |
| H | -0.61444900 | -2.86592200 | 0.22756100  |
| H | -2.66804900 | -2.17307800 | -0.73872200 |
| H | -3.58365500 | -0.14121700 | -0.90538500 |
| H | -3.06742400 | 1.89606800  | -0.24907800 |
| H | -1.20022200 | 2.97808800  | 0.35164100  |
| H | 1.04320100  | 2.16412400  | 0.58908900  |
| H | 0.20863000  | -0.27514400 | -1.09609100 |
| O | 2.51266800  | -0.95111500 | -0.99610200 |
| O | 2.85387500  | 0.57734500  | 0.50067600  |

#### 5.2.2 1-substituted (inward)

##### 1-CH<sub>3</sub>-substituted

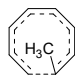

|   |             |             |             |
|---|-------------|-------------|-------------|
| C | 0.34023300  | -1.23781800 | -1.30301600 |
| C | 1.38404500  | -1.23638300 | -0.41187200 |
| C | 1.92321300  | -0.08511000 | 0.20611100  |
| C | 1.43464400  | 1.20866900  | 0.30489000  |
| C | 0.20695900  | 1.87479200  | 0.02712300  |
| C | -1.09756800 | 1.53205000  | -0.30794400 |
| C | -1.77411800 | 0.29679800  | -0.42128300 |
| C | -1.44308500 | -0.91316800 | 0.15289300  |
| H | 0.07982800  | -0.32522700 | -1.82204700 |
| H | 0.02793900  | -2.16579000 | -1.77453100 |
| H | 1.81949200  | -2.19132900 | -0.11975100 |
| H | 2.89257900  | -0.23208700 | 0.68145100  |



|   |             |             |             |
|---|-------------|-------------|-------------|
| H | 2.17494700  | 1.90300200  | 0.70196000  |
| H | 0.33473500  | 2.95577700  | 0.08791900  |
| H | -1.69977100 | 2.38975100  | -0.60675100 |
| H | -2.62456600 | 0.29934500  | -1.10435800 |
| H | -2.05335000 | -1.76678000 | -0.14287800 |
| C | -0.80212300 | -1.04353700 | 1.50411000  |
| H | -0.19544300 | -0.17576300 | 1.76354300  |
| H | -1.60659600 | -1.12692100 | 2.24645000  |
| H | -0.18298000 | -1.94174200 | 1.58292200  |

1-NH<sub>2</sub>-substituted

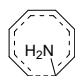

|   |             |             |             |
|---|-------------|-------------|-------------|
| C | 0.54330200  | -1.15542700 | -1.25535200 |
| C | 1.62928900  | -0.82022300 | -0.45240200 |
| C | 1.82175200  | 0.42347200  | 0.15012000  |
| C | 0.98296900  | 1.55642400  | 0.20237800  |
| C | -0.37052300 | 1.82789400  | -0.04613900 |
| C | -1.52858300 | 1.07251100  | -0.34170000 |
| C | -1.77139400 | -0.28960400 | -0.30964400 |
| C | -0.96423300 | -1.26212900 | 0.32265100  |
| N | -0.38752700 | -0.99666400 | 1.54527300  |
| H | 0.05906100  | -0.36725000 | -1.81632900 |
| H | 0.51557300  | -2.13976500 | -1.71725900 |
| H | 2.34721500  | -1.60093300 | -0.19899600 |
| H | 2.79178600  | 0.56906400  | 0.62428500  |
| H | 1.51841100  | 2.44869500  | 0.52759000  |
| H | -0.57851400 | 2.89701200  | -0.01758400 |
| H | -2.36064700 | 1.67668800  | -0.70032100 |
| H | -2.63305500 | -0.66065300 | -0.86097600 |
| H | -1.22824100 | -2.30799600 | 0.18873900  |
| H | -0.12797600 | -0.02924600 | 1.70535200  |
| H | 0.35359600  | -1.62647800 | 1.82912600  |

1-OH-substituted

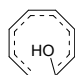

|   |             |             |             |
|---|-------------|-------------|-------------|
| C | 0.63765300  | -1.18927200 | -1.20856900 |
| C | 1.67317900  | -0.74590700 | -0.40211600 |
| C | 1.78247100  | 0.54324000  | 0.13377900  |
| C | 0.87262000  | 1.61135700  | 0.16295800  |
| C | -0.50262000 | 1.78922900  | -0.09760300 |
| C | -1.59938600 | 0.95356500  | -0.36990300 |
| C | -1.73855500 | -0.42783400 | -0.28440000 |
| C | -0.87574300 | -1.29732500 | 0.39245500  |
| H | 0.09704200  | -0.46878200 | -1.80826800 |
| H | 0.67099800  | -2.20083100 | -1.60550200 |
| H | 2.41937100  | -1.46750500 | -0.07372100 |
| H | 2.73726900  | 0.76683600  | 0.60748200  |
| H | 1.34067700  | 2.54248700  | 0.48172700  |
| H | -0.77825900 | 2.84314200  | -0.09502900 |
| H | -2.47763000 | 1.48251500  | -0.73599800 |
| H | -2.55263900 | -0.89648600 | -0.83330400 |
| H | -1.06295200 | -2.36615000 | 0.36986500  |

|   |             |             |            |
|---|-------------|-------------|------------|
| O | -0.22268800 | -0.95806100 | 1.51968600 |
| H | -0.11008300 | 0.00694700  | 1.57565900 |

1-F-substituted

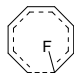

|   |             |             |             |
|---|-------------|-------------|-------------|
| C | 0.71156700  | -1.18794900 | -1.20251100 |
| C | 1.69581400  | -0.73187800 | -0.35955300 |
| C | 1.77878600  | 0.57758900  | 0.16129400  |
| C | 0.86168900  | 1.61839300  | 0.17584100  |
| C | -0.51906500 | 1.78012100  | -0.11374900 |
| C | -1.61220200 | 0.95395000  | -0.34977200 |
| C | -1.76742000 | -0.44009600 | -0.25765300 |
| C | -0.91906400 | -1.30772700 | 0.38320000  |
| H | 0.13088600  | -0.47956400 | -1.77983800 |
| H | 0.75780500  | -2.20143400 | -1.59242000 |
| H | 2.44778200  | -1.43757300 | -0.00962600 |
| H | 2.73330400  | 0.82247100  | 0.62585600  |
| H | 1.30872500  | 2.56053400  | 0.49317700  |
| H | -0.78976800 | 2.83499900  | -0.15978200 |
| H | -2.49960800 | 1.48165900  | -0.69518500 |
| H | -2.58563300 | -0.90118200 | -0.80707400 |
| H | -1.07621000 | -2.38041300 | 0.41853300  |
| F | -0.20087900 | -0.87487900 | 1.43153000  |

1-CHO-substituted

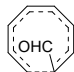

|   |             |             |             |
|---|-------------|-------------|-------------|
| C | -0.38650400 | 0.70010400  | 1.65087700  |
| C | -0.22280500 | 1.71775000  | 0.74538700  |
| C | 0.85679800  | 1.81529600  | -0.16165600 |
| C | 1.77223300  | 0.86714100  | -0.58576100 |
| C | 1.94308200  | -0.54451300 | -0.47168800 |
| C | 1.24788600  | -1.66085200 | -0.01632600 |
| C | -0.05582400 | -1.86864300 | 0.48673400  |
| C | -1.16503100 | -1.06088900 | 0.33871400  |
| H | 0.45658800  | 0.07113300  | 1.90752900  |
| H | -1.21373400 | 0.72168000  | 2.35416200  |
| H | -0.98505800 | 2.49183800  | 0.68464000  |
| H | 0.98975400  | 2.79672700  | -0.61440000 |
| H | 2.57295600  | 1.30339500  | -1.18161700 |
| H | 2.92291000  | -0.83085600 | -0.85408700 |
| H | 1.86485500  | -2.55803200 | 0.00421600  |
| H | -0.16943100 | -2.75168700 | 1.11543700  |
| H | -2.08330000 | -1.31529000 | 0.86476000  |
| C | -1.37769700 | -0.26145700 | -0.88713100 |
| H | -0.51811700 | -0.19667900 | -1.57828300 |
| O | -2.43878200 | 0.25551900  | -1.16215700 |

1-CN-substituted

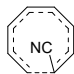

|   |             |             |             |
|---|-------------|-------------|-------------|
| C | -0.64332100 | -0.66594600 | 1.67762300  |
| C | -1.69534400 | -0.30955700 | 0.86738400  |
| C | -1.71116800 | 0.81830200  | 0.02620300  |
| C | -0.70054000 | 1.69766400  | -0.35479000 |
| C | 0.70929800  | 1.76634200  | -0.25744000 |
| C | 1.77682400  | 0.93731000  | 0.10025100  |
| C | 1.86010800  | -0.43023500 | 0.38252900  |
| C | 0.90373700  | -1.40403500 | 0.11747000  |
| H | 0.08926500  | 0.07928100  | 1.96006800  |
| H | -0.72139300 | -1.53616700 | 2.32346400  |
| H | -2.55815200 | -0.97001600 | 0.80951000  |
| H | -2.68329800 | 1.05588600  | -0.40241700 |
| H | -1.09532400 | 2.57136400  | -0.87189100 |
| H | 1.06256300  | 2.75760000  | -0.54168000 |
| H | 2.72071800  | 1.46982100  | 0.20323600  |
| H | 2.73821000  | -0.75603700 | 0.93772600  |
| H | 1.08497700  | -2.41957800 | 0.45897500  |
| C | 0.07755300  | -1.31827100 | -1.04537400 |
| N | -0.58577800 | -1.25736900 | -1.99430400 |

#### 1-NO<sub>2</sub>-substituted

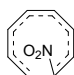

|   |             |             |             |
|---|-------------|-------------|-------------|
| C | -0.22954800 | 0.74367200  | 1.76131400  |
| C | -0.09159900 | 1.71170800  | 0.80570900  |
| C | 0.96388300  | 1.78249000  | -0.13622800 |
| C | 1.92056200  | 0.85460200  | -0.51500400 |
| C | 2.10205700  | -0.54088100 | -0.35604000 |
| C | 1.37020300  | -1.63991300 | 0.08380900  |
| C | 0.05751200  | -1.84302700 | 0.54825400  |
| C | -1.08709700 | -1.08050500 | 0.48761500  |
| N | -1.43945400 | -0.22650300 | -0.62153800 |
| H | 0.60375200  | 0.09486900  | 2.00352300  |
| H | -1.03907800 | 0.79949300  | 2.48334400  |
| H | -0.85747400 | 2.48086800  | 0.73050000  |
| H | 1.06024900  | 2.74661000  | -0.63377300 |
| H | 2.72312600  | 1.29519200  | -1.10523400 |
| H | 3.10058800  | -0.83863800 | -0.67604000 |
| H | 1.97426100  | -2.54343900 | 0.14750500  |
| H | -0.06472400 | -2.73665600 | 1.16055600  |
| H | -1.98055300 | -1.36743300 | 1.02773600  |
| O | -2.55690300 | 0.27865500  | -0.59127100 |
| O | -0.62807300 | -0.06293200 | -1.51672000 |

#### 5.2.3 2-substituted

##### 2-CH<sub>3</sub>-substituted

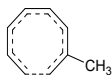

|   |             |             |             |
|---|-------------|-------------|-------------|
| C | 0.59483900  | -1.56564900 | -0.74602900 |
| C | -0.77613100 | -0.86250300 | 0.99322700  |
| C | 1.79568300  | -1.29892100 | -0.14142100 |
| C | 2.28780600  | 0.00002900  | 0.13088300  |
| C | 1.67310100  | 1.23987000  | 0.07733800  |
| C | 0.35877000  | 1.75947400  | -0.14679600 |
| C | -0.94521000 | 1.29730500  | -0.12619900 |
| C | -1.50198400 | 0.05242600  | 0.27555200  |
| H | 0.11273900  | -0.80413200 | -1.34607900 |
| H | 0.28614000  | -2.59166900 | -0.92722000 |
| H | 0.11758800  | -0.54973300 | 1.51752500  |
| H | -1.23140300 | -1.79465800 | 1.31953000  |
| H | 2.39533500  | -2.13286800 | 0.22029500  |
| H | 3.33311000  | 0.03885100  | 0.43440000  |
| H | 2.38697600  | 2.05305900  | 0.20942400  |
| H | 0.40556100  | 2.82567300  | -0.37057200 |
| H | -1.67463000 | 2.02471300  | -0.48472500 |
| C | -2.88539700 | -0.28404300 | -0.22881600 |
| H | -3.29604100 | -1.16068000 | 0.27901200  |
| H | -3.57277300 | 0.55444900  | -0.07130500 |
| H | -2.87146200 | -0.49093300 | -1.30672100 |

#### 2-NH<sub>2</sub>-substituted

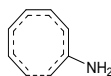

|   |             |             |             |
|---|-------------|-------------|-------------|
| C | 0.63486500  | -1.56906100 | -0.76896800 |
| C | -0.82540200 | -0.88568400 | 1.01083500  |
| C | 1.81524600  | -1.27673700 | -0.14948600 |
| C | 2.27460400  | 0.03720600  | 0.13916400  |
| C | 1.63748100  | 1.26043200  | 0.10024600  |
| C | 0.31016600  | 1.75615200  | -0.13992400 |
| C | -0.98143900 | 1.28258900  | -0.12778300 |
| C | -1.52371600 | 0.01398400  | 0.25502800  |
| H | 0.11074500  | -0.81738100 | -1.34559700 |
| H | 0.34244900  | -2.60044900 | -0.94643100 |
| H | 0.04906100  | -0.55636900 | 1.55406100  |
| H | -1.26879600 | -1.83586100 | 1.29736800  |
| H | 2.43393900  | -2.09617300 | 0.21279000  |
| H | 3.31831800  | 0.09611800  | 0.44609500  |
| H | 2.32799400  | 2.08844000  | 0.25953600  |
| H | 0.34080600  | 2.82378300  | -0.35975900 |
| H | -1.72391900 | 2.00474400  | -0.46984800 |
| N | -2.76384100 | -0.33813700 | -0.30391900 |
| H | -3.36767700 | -0.87806300 | 0.30365100  |
| H | -3.26686100 | 0.42487900  | -0.73910600 |

#### 2-OH-substituted

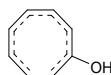

|   |             |             |             |
|---|-------------|-------------|-------------|
| C | 0.62634700  | -1.55860000 | -0.76892800 |
| C | -0.82969800 | -0.92027200 | 0.94388400  |
| C | 1.80729800  | -1.26925000 | -0.13681300 |
| C | 2.25434000  | 0.03854100  | 0.16971800  |

|   |             |             |             |
|---|-------------|-------------|-------------|
| C | 1.61532100  | 1.26583500  | 0.11545000  |
| C | 0.29800800  | 1.76019200  | -0.14776100 |
| C | -0.99565300 | 1.28077200  | -0.15961300 |
| C | -1.52032600 | 0.02233300  | 0.23204300  |
| H | 0.13262200  | -0.80591400 | -1.37080300 |
| H | 0.35067700  | -2.59032700 | -0.97058500 |
| H | 0.03754000  | -0.61023300 | 1.50902300  |
| H | -1.30047600 | -1.85715500 | 1.23348500  |
| H | 2.42297400  | -2.09121800 | 0.22452400  |
| H | 3.28933000  | 0.09906100  | 0.50411100  |
| H | 2.30570500  | 2.09242800  | 0.28220300  |
| H | 0.32912100  | 2.82764000  | -0.36692500 |
| H | -1.75187900 | 1.97317400  | -0.52330400 |
| O | -2.77342300 | -0.22112800 | -0.27299900 |
| H | -3.16205000 | -0.98573100 | 0.17439900  |

#### 2-F-substituted

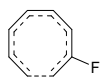

|   |             |             |             |
|---|-------------|-------------|-------------|
| C | 0.63874100  | -1.55666600 | -0.78133600 |
| C | -0.83623100 | -0.96881800 | 0.93284900  |
| C | 1.80518500  | -1.24563400 | -0.13138200 |
| C | 2.23225600  | 0.06614200  | 0.18241800  |
| C | 1.58381300  | 1.28966000  | 0.11879100  |
| C | 0.26641100  | 1.76892000  | -0.15324400 |
| C | -1.01830400 | 1.25998500  | -0.17031200 |
| C | -1.49646800 | 0.00016400  | 0.24103800  |
| H | 0.13967100  | -0.81084600 | -1.38695300 |
| H | 0.38508800  | -2.59244900 | -0.98913400 |
| H | 0.03351400  | -0.68773500 | 1.50814800  |
| H | -1.35005500 | -1.88958400 | 1.18816900  |
| H | 2.42903300  | -2.05853300 | 0.23652100  |
| H | 3.26187000  | 0.13633100  | 0.53070900  |
| H | 2.26654900  | 2.12206900  | 0.28756200  |
| H | 0.28013700  | 2.83614800  | -0.37328700 |
| H | -1.79276200 | 1.92859000  | -0.53923600 |
| F | -2.74505200 | -0.29627800 | -0.21060300 |

#### 2-CHO-substituted

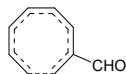

|   |             |             |             |
|---|-------------|-------------|-------------|
| C | 0.99943200  | -1.52150300 | -0.82912300 |
| C | -0.34761700 | -1.02222500 | 1.01336500  |
| C | 2.18505500  | -1.18281000 | -0.23595400 |
| C | 2.59009500  | 0.14020300  | 0.08203500  |
| C | 1.89151000  | 1.33204500  | 0.08807400  |
| C | 0.53559800  | 1.76100600  | -0.09584300 |
| C | -0.72152800 | 1.20104300  | -0.02122000 |
| C | -1.14348200 | -0.09190600 | 0.39047700  |
| H | 0.42769300  | -0.77258000 | -1.36256900 |
| H | 0.77422100  | -2.56004200 | -1.05479600 |
| H | 0.55401900  | -0.71784300 | 1.52651900  |
| H | -0.76358600 | -1.98913300 | 1.29251100  |
| H | 2.85831300  | -1.98069200 | 0.07424500  |

|   |             |             |             |
|---|-------------|-------------|-------------|
| H | 3.63766300  | 0.23944700  | 0.36183700  |
| H | 2.54772000  | 2.19014700  | 0.23481000  |
| H | 0.49752500  | 2.82726900  | -0.31858100 |
| H | -1.53988100 | 1.85179400  | -0.32423300 |
| C | -2.53276700 | -0.49963400 | 0.06261800  |
| H | -2.78062600 | -1.54986500 | 0.32507000  |
| O | -3.36885500 | 0.22052300  | -0.43517400 |

#### 2-CN-substituted

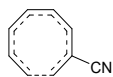

|   |             |             |             |
|---|-------------|-------------|-------------|
| C | 0.74325500  | -1.59075000 | -0.76914500 |
| C | -0.55036700 | -0.81010300 | 1.05456300  |
| C | 1.95086200  | -1.37891200 | -0.16673200 |
| C | 2.52256800  | -0.10412600 | 0.09455400  |
| C | 1.98465300  | 1.16574700  | 0.04345600  |
| C | 0.69725000  | 1.75991500  | -0.17814500 |
| C | -0.62471300 | 1.38021100  | -0.10793200 |
| C | -1.21474400 | 0.16744100  | 0.35957000  |
| H | 0.27150300  | -0.80161800 | -1.34136100 |
| H | 0.37944100  | -2.59979000 | -0.94054600 |
| H | 0.38258400  | -0.56641400 | 1.54375000  |
| H | -1.07049700 | -1.70550500 | 1.37968800  |
| H | 2.51140300  | -2.24087400 | 0.19197300  |
| H | 3.57259000  | -0.12800000 | 0.38137800  |
| H | 2.74395200  | 1.93778800  | 0.16518800  |
| H | 0.80127200  | 2.81220900  | -0.44142300 |
| H | -1.33528800 | 2.12776600  | -0.45351100 |
| C | -2.58590500 | -0.07663700 | -0.02326300 |
| N | -3.68487400 | -0.27318400 | -0.33238500 |

#### 2-NO<sub>2</sub>-substituted

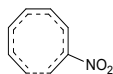

|   |             |             |             |
|---|-------------|-------------|-------------|
| C | 1.07140500  | -1.54606400 | -0.84717400 |
| C | -0.21291500 | -0.84552800 | 1.02483300  |
| C | 2.27262000  | -1.36175000 | -0.22640600 |
| C | 2.85083000  | -0.10044700 | 0.09159900  |
| C | 2.32088800  | 1.17235500  | 0.09850500  |
| C | 1.03596600  | 1.78469500  | -0.09644400 |
| C | -0.28600600 | 1.40976400  | -0.03167200 |
| C | -0.84660400 | 0.17592000  | 0.38686100  |
| H | 0.60165100  | -0.73081200 | -1.38401100 |
| H | 0.70145400  | -2.54528100 | -1.05788400 |
| H | 0.71856800  | -0.63082000 | 1.52912400  |
| H | -0.74926000 | -1.75142100 | 1.28115100  |
| H | 2.82757300  | -2.23984600 | 0.10056600  |
| H | 3.90074700  | -0.14352200 | 0.37642800  |
| H | 3.08430500  | 1.93375800  | 0.25605100  |
| H | 1.14566100  | 2.84605600  | -0.31610700 |
| H | -1.00838400 | 2.16300100  | -0.32887700 |
| N | -2.25335100 | -0.06650200 | -0.01797200 |
| O | -2.91040000 | 0.88697700  | -0.39755300 |

O -2.67534500 -1.20813700 0.05614700

### 5.2.4 3-substituted

#### 3-CH<sub>3</sub>-substituted

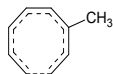

|   |             |             |             |
|---|-------------|-------------|-------------|
| C | -1.53812100 | -1.09695100 | 0.90077800  |
| C | -0.16611100 | -1.55664700 | -0.89033800 |
| C | -2.33642900 | -0.17846500 | 0.26655400  |
| C | -1.90476100 | 1.10015900  | -0.15291100 |
| C | -0.63677500 | 1.65771900  | -0.22659300 |
| C | 0.72408800  | 1.25818200  | -0.05063300 |
| C | 1.46871100  | 0.08437800  | -0.01285600 |
| C | 1.03247000  | -1.23263800 | -0.30962300 |
| H | -0.64816200 | -0.76456700 | 1.41873300  |
| H | -1.93894400 | -2.06197600 | 1.19878600  |
| H | -0.71380600 | -0.80639400 | -1.44565100 |
| H | -0.40439300 | -2.59366200 | -1.10939700 |
| H | -3.35191700 | -0.46431800 | -0.00402600 |
| H | -2.70015600 | 1.77204200  | -0.47188000 |
| H | -0.68341700 | 2.72374700  | -0.45144300 |
| H | 1.35562700  | 2.14143800  | 0.05107900  |
| H | 1.68843700  | -2.04312800 | 0.01016700  |
| C | 2.93251400  | 0.20222200  | 0.37168200  |
| H | 3.20994700  | 1.23198500  | 0.60881900  |
| H | 3.14857300  | -0.41265700 | 1.25358500  |
| H | 3.58469300  | -0.15026400 | -0.43513200 |

#### 3-NH<sub>2</sub>-substituted

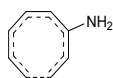

|   |             |             |             |
|---|-------------|-------------|-------------|
| C | -1.55505800 | -1.11385200 | 0.89066800  |
| C | -0.13780600 | -1.54123200 | -0.88854900 |
| C | -2.32416700 | -0.17225500 | 0.25344300  |
| C | -1.87718500 | 1.10479300  | -0.15266400 |
| C | -0.60286300 | 1.65784700  | -0.21306500 |
| C | 0.75301400  | 1.26264000  | -0.06171600 |
| C | 1.49271000  | 0.07864800  | -0.00201000 |
| C | 1.05944100  | -1.24000500 | -0.29737200 |
| H | -0.66200900 | -0.81082900 | 1.42041000  |
| H | -1.98488500 | -2.07018800 | 1.17648800  |
| H | -0.67252000 | -0.78011900 | -1.44224800 |
| H | -0.39124800 | -2.57371600 | -1.10912400 |
| H | -3.34274000 | -0.43874700 | -0.02724500 |
| H | -2.66384300 | 1.78432900  | -0.47561800 |
| H | -0.64833900 | 2.72483000  | -0.43384600 |
| H | 1.40821000  | 2.13350800  | -0.01479500 |
| N | 2.85584300  | 0.22697700  | 0.31326900  |
| H | 3.06466100  | 0.91548200  | 1.02476100  |
| H | 3.35649700  | -0.63765900 | 0.47084000  |
| H | 1.69679700  | -2.05522600 | 0.04508000  |

3-OH-substituted

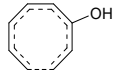

|   |             |             |             |
|---|-------------|-------------|-------------|
| C | -1.52904600 | -1.12101800 | 0.88441800  |
| C | -0.08520600 | -1.56402000 | -0.87693400 |
| C | -2.30487000 | -0.20247400 | 0.22490500  |
| C | -1.87704900 | 1.08410400  | -0.17841100 |
| C | -0.61687100 | 1.66378500  | -0.20870700 |
| C | 0.74100000  | 1.28297100  | -0.02092100 |
| C | 1.47924000  | 0.10905200  | 0.01598600  |
| C | 1.09699400  | -1.22288600 | -0.27731200 |
| H | -0.64718600 | -0.79583500 | 1.42061600  |
| H | -1.94367800 | -2.08300500 | 1.17318100  |
| H | -0.63260100 | -0.82553200 | -1.44796400 |
| H | -0.31048500 | -2.60578100 | -1.08306100 |
| H | -3.31229600 | -0.49172900 | -0.07222400 |
| H | -2.67283100 | 1.74613700  | -0.51518700 |
| H | -0.67323000 | 2.73087500  | -0.42447300 |
| H | 1.39769000  | 2.14469600  | 0.08939800  |
| H | 1.75257000  | -2.01207900 | 0.09247100  |
| O | 2.78675100  | 0.30898200  | 0.40398900  |
| H | 3.32288700  | -0.45668900 | 0.15718700  |

3-F-substituted

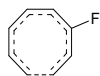

|   |             |             |             |
|---|-------------|-------------|-------------|
| C | -1.49910800 | -1.10977400 | 0.89007200  |
| C | -0.06534000 | -1.60326000 | -0.86302800 |
| C | -2.27965200 | -0.20138800 | 0.22171100  |
| C | -1.86165500 | 1.08687100  | -0.18833200 |
| C | -0.60819400 | 1.67659900  | -0.21938400 |
| C | 0.74532400  | 1.28459700  | -0.01364800 |
| C | 1.45129900  | 0.10084700  | 0.00654600  |
| C | 1.11766300  | -1.23693200 | -0.27747300 |
| H | -0.62116000 | -0.77606000 | 1.42753600  |
| H | -1.90943700 | -2.07105200 | 1.18663700  |
| H | -0.62539100 | -0.88378200 | -1.44510400 |
| H | -0.27434700 | -2.65121700 | -1.05432200 |
| H | -3.28345500 | -0.50049700 | -0.07680400 |
| H | -2.66279500 | 1.73983000  | -0.53023400 |
| H | -0.66234500 | 2.74250500  | -0.43896300 |
| H | 1.41434100  | 2.13352200  | 0.11944200  |
| F | 2.75595400  | 0.25202500  | 0.37698400  |
| H | 1.81898400  | -1.98683200 | 0.08017500  |

3-CHO-substituted

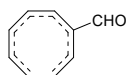

|   |             |             |            |
|---|-------------|-------------|------------|
| C | -1.66256900 | -1.18555000 | 0.93792700 |
|---|-------------|-------------|------------|



|   |             |             |             |
|---|-------------|-------------|-------------|
| C | -0.35248700 | -1.57254200 | -0.94660200 |
| C | -2.58200600 | -0.36472200 | 0.33558300  |
| C | -2.31674400 | 0.95814900  | -0.08241400 |
| C | -1.12282500 | 1.65398500  | -0.20498000 |
| C | 0.26808500  | 1.36500700  | -0.11137100 |
| C | 1.09915100  | 0.24931800  | -0.12987200 |
| C | 0.81469100  | -1.11430000 | -0.40096300 |
| H | -0.78956200 | -0.75802100 | 1.41377900  |
| H | -1.93609500 | -2.19170400 | 1.24236600  |
| H | -1.00840000 | -0.89699700 | -1.48017500 |
| H | -0.48588200 | -2.63310400 | -1.14094400 |
| H | -3.56820300 | -0.76337400 | 0.10395600  |
| H | -3.19646100 | 1.54103800  | -0.35079600 |
| H | -1.28452300 | 2.71447800  | -0.39589100 |
| H | 0.84026400  | 2.29135700  | -0.02304600 |
| H | 1.58366900  | -1.82134200 | -0.09521000 |
| C | 2.52076600  | 0.54584300  | 0.20769300  |
| H | 2.75778500  | 1.62137700  | 0.34570700  |
| O | 3.38638000  | -0.28935300 | 0.34378000  |

### 3-CN-substituted

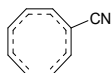

|   |             |             |             |
|---|-------------|-------------|-------------|
| C | -1.75007800 | -1.02614600 | 0.98912600  |
| C | -0.48994600 | -1.61576100 | -0.90979400 |
| C | -2.55200500 | -0.11663900 | 0.35245500  |
| C | -2.11644300 | 1.14625000  | -0.11313400 |
| C | -0.84492400 | 1.67809300  | -0.25620300 |
| C | 0.50427900  | 1.23419100  | -0.13896700 |
| C | 1.18216500  | 0.01807200  | -0.12625600 |
| C | 0.72778100  | -1.30930900 | -0.37279400 |
| H | -0.82099800 | -0.70367100 | 1.44184900  |
| H | -2.15098300 | -1.97679200 | 1.32874700  |
| H | -1.05369400 | -0.86449600 | -1.44657000 |
| H | -0.76423600 | -2.65185900 | -1.08321000 |
| H | -3.58314000 | -0.38850200 | 0.13359600  |
| H | -2.91387600 | 1.82769200  | -0.40500700 |
| H | -0.87112000 | 2.74168900  | -0.49034500 |
| H | 1.18649600  | 2.08033000  | -0.07223300 |
| H | 1.38715500  | -2.11322400 | -0.05300200 |
| C | 2.59340300  | 0.11909200  | 0.18066300  |
| N | 3.72271300  | 0.18311000  | 0.43080100  |

### 3-NO<sub>2</sub>-substituted

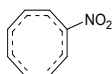

|   |             |             |             |
|---|-------------|-------------|-------------|
| C | 2.08947400  | 1.01515200  | 1.00027700  |
| C | 0.85817900  | 1.62684100  | -0.90979900 |
| C | 2.89424000  | 0.10789600  | 0.36416100  |
| C | 2.45519100  | -1.14779800 | -0.11665300 |
| C | 1.18124300  | -1.66668800 | -0.28158500 |
| C | -0.16463400 | -1.21023100 | -0.17855900 |
| C | -0.81406900 | 0.00817900  | -0.16682600 |

|   |             |             |             |
|---|-------------|-------------|-------------|
| C | -0.36773000 | 1.33423800  | -0.38463600 |
| H | 1.15604500  | 0.69246500  | 1.44377200  |
| H | 2.48895100  | 1.96325300  | 1.34845200  |
| H | 1.41850800  | 0.87767300  | -1.45321100 |
| H | 1.14969500  | 2.66173800  | -1.06010200 |
| H | 3.92864300  | 0.37650800  | 0.15761600  |
| H | 3.25041100  | -1.83372100 | -0.40412700 |
| H | 1.19992400  | -2.72754700 | -0.52679800 |
| H | -0.86587300 | -2.03848700 | -0.13074200 |
| N | -2.28214400 | -0.08945600 | 0.12605600  |
| H | -1.02042500 | 2.13386100  | -0.05290300 |
| O | -2.90846000 | 0.95418500  | 0.19983800  |
| O | -2.78182000 | -1.18982200 | 0.27983300  |

### 5.2.5 4-substituted

#### 4-CH<sub>3</sub>-substituted

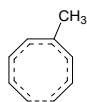

|   |             |             |             |
|---|-------------|-------------|-------------|
| C | 1.96565600  | -0.06125400 | 0.90035300  |
| C | 1.34804400  | 1.38844800  | -0.77077600 |
| C | 1.85365700  | -1.21736100 | 0.16858900  |
| C | 0.63353700  | -1.76059800 | -0.29269600 |
| C | -0.66057500 | -1.26257400 | -0.30786500 |
| C | -1.35606300 | -0.05078200 | 0.01626300  |
| C | -0.95652500 | 1.27422000  | 0.14535200  |
| C | 0.26541800  | 1.93183200  | -0.12561500 |
| H | 1.11453100  | 0.30009200  | 1.46241900  |
| H | 2.94176500  | 0.29319800  | 1.22023400  |
| H | 1.21759800  | 0.52768800  | -1.41319700 |
| H | 2.23719900  | 1.98892500  | -0.94278800 |
| H | 2.76272100  | -1.71906700 | -0.15959800 |
| H | 0.71678500  | -2.76004200 | -0.71772400 |
| H | -1.37095500 | -2.03519600 | -0.60931000 |
| H | -1.73606400 | 1.93825900  | 0.51575900  |
| H | 0.36499200  | 2.93408300  | 0.28946000  |
| C | -2.84959200 | -0.30029700 | 0.20358300  |
| H | -3.03312100 | -1.05677300 | 0.97403700  |
| H | -3.38330200 | 0.60994000  | 0.48589900  |
| H | -3.29349700 | -0.67091000 | -0.72831000 |

#### 4-NH<sub>2</sub>-substituted

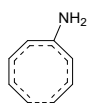

|   |             |             |             |
|---|-------------|-------------|-------------|
| C | 1.93182200  | -0.02297700 | 0.90584600  |
| C | 1.30538700  | 1.41368900  | -0.77845100 |
| C | 1.84985900  | -1.19605100 | 0.19616900  |
| C | 0.64653200  | -1.75397400 | -0.29121900 |
| C | -0.65234000 | -1.27865100 | -0.34725300 |
| C | -1.36854200 | -0.08546100 | 0.01194900  |
| C | -0.99250800 | 1.24841500  | 0.16568900  |

|   |             |             |             |
|---|-------------|-------------|-------------|
| C | 0.20298400  | 1.92977000  | -0.14118500 |
| H | 1.06695300  | 0.33416200  | 1.44990500  |
| H | 2.89765100  | 0.34902900  | 1.23707400  |
| H | 1.20781400  | 0.54599300  | -1.41733000 |
| H | 2.17445000  | 2.04304300  | -0.94793200 |
| H | 2.77024800  | -1.68942700 | -0.11086900 |
| H | 0.75520000  | -2.74413000 | -0.73188500 |
| H | -1.35126100 | -2.02846300 | -0.71846600 |
| H | -1.77551800 | 1.88391800  | 0.57879100  |
| N | -2.75346500 | -0.34753300 | 0.13618200  |
| H | -2.98135600 | -1.17208800 | 0.67862000  |
| H | -3.30866200 | 0.44621100  | 0.42971400  |
| H | 0.27957100  | 2.93591700  | 0.26983900  |

#### 4-OH-substituted

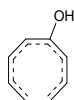

|   |             |             |             |
|---|-------------|-------------|-------------|
| C | 1.93515000  | 0.01575400  | 0.88744100  |
| C | 1.23675800  | 1.46417400  | -0.78351100 |
| C | 1.87826700  | -1.14494900 | 0.15912900  |
| C | 0.68103200  | -1.75260100 | -0.28424600 |
| C | -0.63310000 | -1.32281000 | -0.29614000 |
| C | -1.35912200 | -0.13284900 | 0.02548500  |
| C | -1.04634600 | 1.21264100  | 0.16563500  |
| C | 0.13127600  | 1.93618200  | -0.12345600 |
| H | 1.06788600  | 0.33830000  | 1.44930100  |
| H | 2.89316100  | 0.42228300  | 1.19962800  |
| H | 1.15972100  | 0.59893300  | -1.42855700 |
| H | 2.08861500  | 2.11731800  | -0.94906000 |
| H | 2.80781700  | -1.60092900 | -0.17679500 |
| H | 0.80701900  | -2.74902200 | -0.70501700 |
| H | -1.33783600 | -2.10090500 | -0.58422600 |
| H | -1.85971200 | 1.81614700  | 0.57060500  |
| H | 0.17907200  | 2.93697000  | 0.30390800  |
| O | -2.68917100 | -0.46995900 | 0.20412600  |
| H | -3.23586300 | 0.32732700  | 0.18518800  |

#### 4-F-substituted

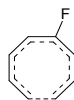

|   |             |             |             |
|---|-------------|-------------|-------------|
| C | 1.92403300  | 0.00365300  | 0.88741800  |
| C | 1.20569600  | 1.49280700  | -0.77121200 |
| C | 1.87106300  | -1.13938500 | 0.13477400  |
| C | 0.67448200  | -1.76223400 | -0.29398500 |
| C | -0.63878100 | -1.33342000 | -0.27779300 |
| C | -1.33066300 | -0.12706100 | 0.02460900  |
| C | -1.07680000 | 1.22069700  | 0.14954000  |
| C | 0.10259300  | 1.95759300  | -0.10609200 |
| H | 1.05663900  | 0.31629200  | 1.45480000  |
| H | 2.88009900  | 0.41705300  | 1.19564100  |
| H | 1.12838800  | 0.63141800  | -1.42169700 |
| H | 2.06363400  | 2.14089900  | -0.92489300 |

|   |             |             |             |
|---|-------------|-------------|-------------|
| H | 2.80192600  | -1.57986800 | -0.21775400 |
| H | 0.79935700  | -2.75972900 | -0.71144500 |
| H | -1.35895700 | -2.10700700 | -0.53921600 |
| H | -1.93706300 | 1.78186200  | 0.50659800  |
| H | 0.14109400  | 2.95461400  | 0.32951200  |
| F | -2.66276200 | -0.40793700 | 0.20498900  |

#### 4-CHO-substituted

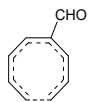

|   |             |             |             |
|---|-------------|-------------|-------------|
| C | 2.22444000  | -0.38950700 | 0.90607100  |
| C | 1.87430900  | 1.16921600  | -0.77742200 |
| C | 1.89509300  | -1.48620900 | 0.15392600  |
| C | 0.58591200  | -1.80967200 | -0.28221700 |
| C | -0.58876700 | -1.08251100 | -0.28576200 |
| C | -1.00788000 | 0.25370400  | 0.01644700  |
| C | -0.39026700 | 1.49454900  | 0.13856600  |
| C | 0.92922100  | 1.91904100  | -0.12283300 |
| H | 1.46037300  | 0.12436400  | 1.47401500  |
| H | 3.25314000  | -0.22020900 | 1.21194100  |
| H | 1.56671800  | 0.34726600  | -1.40970100 |
| H | 2.86715900  | 1.57356600  | -0.95384100 |
| H | 2.69549300  | -2.13777700 | -0.19380400 |
| H | 0.47850800  | -2.81470100 | -0.68705700 |
| H | -1.45560800 | -1.68628100 | -0.55208000 |
| H | -1.05149000 | 2.28404600  | 0.49807700  |
| H | 1.21857600  | 2.88633800  | 0.28382100  |
| C | -2.49604100 | 0.35859300  | 0.19405800  |
| H | -2.85317100 | 1.36193800  | 0.50431100  |
| O | -3.29197800 | -0.53522100 | 0.02241400  |

#### 4-CN-substituted

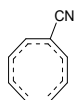

|   |             |             |             |
|---|-------------|-------------|-------------|
| C | 2.17941700  | -0.16567500 | 0.95579300  |
| C | 1.65421700  | 1.35366700  | -0.75734000 |
| C | 2.03390600  | -1.28449300 | 0.18163400  |
| C | 0.80016400  | -1.78718200 | -0.30332700 |
| C | -0.46795600 | -1.24284400 | -0.34398500 |
| C | -1.08076500 | 0.02499000  | -0.04287700 |
| C | -0.65885300 | 1.34304000  | 0.10967300  |
| C | 0.59914900  | 1.94474100  | -0.11345000 |
| H | 1.33286400  | 0.23722200  | 1.49599800  |
| H | 3.16356700  | 0.14499100  | 1.29488600  |
| H | 1.48890700  | 0.49869500  | -1.39961500 |
| H | 2.58362400  | 1.89706500  | -0.90159500 |
| H | 2.92921800  | -1.81202800 | -0.14338600 |
| H | 0.85292200  | -2.79021400 | -0.72276200 |
| H | -1.21806400 | -1.96742700 | -0.65655500 |
| H | -1.43670500 | 2.02001200  | 0.45622700  |
| H | 0.73699300  | 2.93530200  | 0.31546400  |

|   |             |             |            |
|---|-------------|-------------|------------|
| C | -2.52018900 | -0.11280700 | 0.10205400 |
| N | -3.66683800 | -0.22917800 | 0.21889700 |

#### 4-NO<sub>2</sub>-substituted

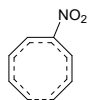

|   |             |             |             |
|---|-------------|-------------|-------------|
| C | 2.51497400  | -0.08762300 | 0.97792500  |
| C | 2.01021200  | 1.27042600  | -0.87588500 |
| C | 2.35939600  | -1.26836000 | 0.30372700  |
| C | 1.12511500  | -1.79819600 | -0.14923800 |
| C | -0.13801500 | -1.25046100 | -0.25815800 |
| C | -0.71849500 | 0.03707100  | -0.06590100 |
| C | -0.30923400 | 1.35522000  | -0.02244800 |
| C | 0.95413400  | 1.92347000  | -0.29730600 |
| H | 1.67212600  | 0.37494000  | 1.47399000  |
| H | 3.50153200  | 0.23789600  | 1.29559300  |
| H | 1.84584800  | 0.35914200  | -1.43532800 |
| H | 2.94251100  | 1.79519900  | -1.06364800 |
| H | 3.25047300  | -1.83348500 | 0.03554200  |
| H | 1.17232000  | -2.83379900 | -0.48038300 |
| H | -0.89512200 | -1.97861200 | -0.53149200 |
| H | -1.08643900 | 2.05167700  | 0.27457300  |
| N | -2.22524100 | -0.06972300 | 0.08025300  |
| H | 1.09476400  | 2.94863700  | 0.03883700  |
| O | -2.79939700 | 0.79621800  | 0.71497100  |
| O | -2.78933400 | -1.01156800 | -0.44569000 |

### 5.3

#### Disubstituted

##### 5.3.1 1,2-substituted

##### 1-CH<sub>3</sub>-2-CH<sub>3</sub>-substituted

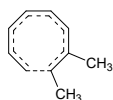

|   |             |             |             |
|---|-------------|-------------|-------------|
| C | -0.47136900 | -1.23737400 | 1.16758300  |
| C | -1.59725600 | -1.50375700 | 0.43592200  |
| C | -2.40449900 | -0.51055600 | -0.17182700 |
| C | -2.17853200 | 0.84217200  | -0.35890200 |
| C | -1.10443700 | 1.76767000  | -0.16225200 |
| C | 0.27003300  | 1.73061900  | 0.00437600  |
| C | 1.21433100  | 0.67146800  | -0.08207400 |
| C | 0.87473800  | -0.54632700 | -0.62450400 |
| H | -0.32443800 | -0.25116200 | 1.58962000  |
| H | 0.10733000  | -2.04689100 | 1.60587000  |
| H | -1.86682500 | -2.54121100 | 0.24278300  |
| H | -3.36383900 | -0.86040400 | -0.55013000 |
| H | -3.06648400 | 1.35911400  | -0.72396200 |
| H | -1.47764500 | 2.79188300  | -0.18452000 |
| H | 0.70505200  | 2.70333700  | 0.23515000  |
| H | -0.02598700 | -0.57820400 | -1.22776600 |
| C | 1.84708700  | -1.67732100 | -0.81211000 |

|   |            |             |             |
|---|------------|-------------|-------------|
| H | 2.49643400 | -1.80750000 | 0.05934100  |
| H | 1.31879200 | -2.61857500 | -0.98795300 |
| H | 2.49330700 | -1.49362100 | -1.68170500 |
| C | 2.58144100 | 0.88430400  | 0.52653900  |
| H | 3.38250300 | 0.51051900  | -0.11971400 |
| H | 2.76441500 | 1.94539400  | 0.71699700  |
| H | 2.66816500 | 0.36191900  | 1.48948200  |

1-CH<sub>3</sub>-2-NH<sub>2</sub>-substituted

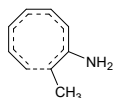

|   |             |             |             |
|---|-------------|-------------|-------------|
| C | -0.46208700 | -1.27389500 | 1.15381500  |
| C | -1.57491500 | -1.54395800 | 0.41093100  |
| C | -2.39167800 | -0.54975100 | -0.19173800 |
| C | -2.18545300 | 0.80350200  | -0.36947700 |
| C | -1.12476700 | 1.74723500  | -0.15168100 |
| C | 0.24340600  | 1.73909200  | 0.01195200  |
| C | 1.20747600  | 0.68684300  | -0.06433400 |
| C | 0.93440300  | -0.52918000 | -0.63875500 |
| H | -0.31318500 | -0.29010300 | 1.58104200  |
| H | 0.13422500  | -2.07898400 | 1.57594300  |
| H | -1.83023000 | -2.58123700 | 0.19963200  |
| H | -3.34545400 | -0.90817300 | -0.57699800 |
| H | -3.07376500 | 1.31051000  | -0.74641200 |
| H | -1.51643100 | 2.76475600  | -0.16534900 |
| H | 0.66831600  | 2.71917200  | 0.23338000  |
| H | 0.05549500  | -0.57995800 | -1.26961700 |
| C | 1.96063000  | -1.61814300 | -0.76085600 |
| H | 2.52775100  | -1.72979000 | 0.17040900  |
| H | 1.48504700  | -2.57632000 | -0.98806000 |
| H | 2.67969700  | -1.41243300 | -1.56762600 |
| N | 2.43608400  | 0.88752000  | 0.59157500  |
| H | 3.24909400  | 0.54675300  | 0.09090000  |
| H | 2.58476300  | 1.83270300  | 0.92258800  |

1-CH<sub>3</sub>-2-OH-substituted

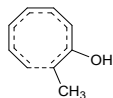

|   |             |             |             |
|---|-------------|-------------|-------------|
| C | -0.42433000 | -1.28752500 | 1.13231200  |
| C | -1.53348700 | -1.57731200 | 0.38176600  |
| C | -2.35938200 | -0.59859700 | -0.22145000 |
| C | -2.18672500 | 0.76714000  | -0.37327500 |
| C | -1.15858900 | 1.73231100  | -0.12843600 |
| C | 0.21034700  | 1.75342400  | 0.05478200  |
| C | 1.18028200  | 0.72539000  | -0.04772200 |
| C | 0.94853600  | -0.51553700 | -0.58848300 |
| H | -0.32038200 | -0.31069800 | 1.58810100  |
| H | 0.17275400  | -2.08696500 | 1.56472600  |
| H | -1.76671200 | -2.61837900 | 0.16409100  |
| H | -3.29649600 | -0.97433200 | -0.63011700 |
| H | -3.08662300 | 1.25476500  | -0.74811200 |

|   |             |             |             |
|---|-------------|-------------|-------------|
| H | -1.57435900 | 2.74008000  | -0.12981300 |
| H | 0.63367700  | 2.72129500  | 0.31578100  |
| H | 0.08054800  | -0.59025300 | -1.23125800 |
| C | 2.01744900  | -1.56413500 | -0.73350500 |
| H | 2.60597000  | -1.67864900 | 0.18481600  |
| H | 1.56921000  | -2.53678000 | -0.95308100 |
| H | 2.70931600  | -1.33329100 | -1.55597000 |
| O | 2.37907900  | 1.04293900  | 0.54507000  |
| H | 3.07585500  | 0.45874100  | 0.21433800  |

#### 1-CH<sub>3</sub>-2-F-substituted

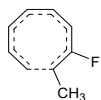

|   |             |             |             |
|---|-------------|-------------|-------------|
| C | -0.37943300 | -1.30375500 | 1.12454500  |
| C | -1.47971900 | -1.60925100 | 0.36324100  |
| C | -2.32935300 | -0.65007700 | -0.23271300 |
| C | -2.20073800 | 0.72465200  | -0.37059300 |
| C | -1.20196800 | 1.71291700  | -0.12377200 |
| C | 0.16850900  | 1.75138600  | 0.06869600  |
| C | 1.13219000  | 0.73542800  | -0.05806700 |
| C | 0.97806500  | -0.51894900 | -0.58194000 |
| H | -0.30611900 | -0.33225400 | 1.59708400  |
| H | 0.22988700  | -2.09518800 | 1.55389800  |
| H | -1.68592000 | -2.65363400 | 0.13440600  |
| H | -3.25282100 | -1.05004300 | -0.64899000 |
| H | -3.11748200 | 1.18706000  | -0.73599900 |
| H | -1.63609500 | 2.71251600  | -0.12261400 |
| H | 0.58321600  | 2.71810700  | 0.34610200  |
| H | 0.11988100  | -0.64202400 | -1.23092800 |
| C | 2.11266800  | -1.49328300 | -0.71396000 |
| H | 2.78253300  | -1.44345500 | 0.14775400  |
| H | 1.73210500  | -2.51384700 | -0.80833000 |
| H | 2.70590100  | -1.27379900 | -1.61026000 |
| F | 2.33817600  | 1.03246100  | 0.50280700  |

#### 1-CH<sub>3</sub>-2-CHO-substituted

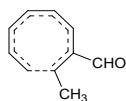

|   |             |             |             |
|---|-------------|-------------|-------------|
| C | -0.71969000 | -1.22234000 | 1.19651100  |
| C | -1.84916500 | -1.48086800 | 0.47438400  |
| C | -2.67296400 | -0.48590200 | -0.12071500 |
| C | -2.44918500 | 0.86096900  | -0.31573300 |
| C | -1.36245700 | 1.78202400  | -0.13427000 |
| C | 0.01136800  | 1.72250200  | -0.03647100 |
| C | 0.94004800  | 0.64716000  | -0.16659800 |
| C | 0.59085700  | -0.59022200 | -0.67348400 |
| H | -0.54400300 | -0.22984500 | 1.59231000  |
| H | -0.13665900 | -2.03265600 | 1.62538400  |
| H | -2.12482700 | -2.51763400 | 0.28592100  |
| H | -3.64052300 | -0.83796900 | -0.47404300 |
| H | -3.34025200 | 1.38292600  | -0.66528000 |

|   |             |             |             |
|---|-------------|-------------|-------------|
| H | -1.72891900 | 2.80816300  | -0.11759500 |
| H | 0.47579100  | 2.68707400  | 0.17220900  |
| H | -0.33900800 | -0.61286300 | -1.23174000 |
| C | 1.51374900  | -1.75489800 | -0.88605400 |
| H | 2.09596400  | -1.98866000 | 0.00600100  |
| H | 0.94099800  | -2.63320100 | -1.19501600 |
| H | 2.24000700  | -1.52023000 | -1.67537900 |
| C | 2.31110100  | 0.93291600  | 0.31220600  |
| H | 2.48614800  | 1.99076800  | 0.60204300  |
| O | 3.21666500  | 0.12951100  | 0.39706600  |

1-CH<sub>3</sub>-2-CN-substituted

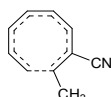

|   |             |             |             |
|---|-------------|-------------|-------------|
| C | 0.72212200  | 1.18309600  | 1.20150800  |
| C | 1.90174900  | 1.35346400  | 0.52751100  |
| C | 2.64499500  | 0.30235100  | -0.06704600 |
| C | 2.30854600  | -1.01816800 | -0.30057200 |
| C | 1.14429800  | -1.84335500 | -0.17664700 |
| C | -0.22299500 | -1.67261500 | -0.09194300 |
| C | -1.02275200 | -0.50236300 | -0.22252000 |
| C | -0.56006000 | 0.71591600  | -0.67938300 |
| H | 0.45823200  | 0.20651800  | 1.58819900  |
| H | 0.20586000  | 2.03428500  | 1.63766100  |
| H | 2.27967100  | 2.36368300  | 0.37699800  |
| H | 3.65008100  | 0.57132200  | -0.38721100 |
| H | 3.16240100  | -1.60783400 | -0.63385600 |
| H | 1.41747400  | -2.89805000 | -0.18813100 |
| H | -0.78422800 | -2.58577900 | 0.09405200  |
| H | 0.36762900  | 0.68118300  | -1.23917100 |
| C | -1.43161100 | 1.91924300  | -0.88230900 |
| H | -0.83626500 | 2.83586100  | -0.86632200 |
| H | -1.92389600 | 1.86060700  | -1.86162600 |
| H | -2.21352700 | 1.98841700  | -0.12106800 |
| C | -2.38550200 | -0.58966900 | 0.24310200  |
| N | -3.48231200 | -0.64823000 | 0.61289500  |

1-CH<sub>3</sub>-2-NO<sub>2</sub>-substituted

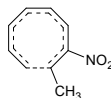

|   |             |             |             |
|---|-------------|-------------|-------------|
| C | 1.11109600  | 1.15930500  | 1.19986500  |
| C | 2.30648400  | 1.20817000  | 0.53679700  |
| C | 2.94661500  | 0.08456600  | -0.04886400 |
| C | 2.47843100  | -1.19320900 | -0.28631300 |
| C | 1.23438100  | -1.89775500 | -0.17163500 |
| C | -0.11084500 | -1.59742700 | -0.11663200 |
| C | -0.77541900 | -0.35402700 | -0.25974800 |
| C | -0.18883700 | 0.81187100  | -0.69580200 |
| H | 0.74480800  | 0.21449000  | 1.58295900  |
| H | 0.67434000  | 2.05944400  | 1.62327300  |
| H | 2.78447600  | 2.17519600  | 0.38741500  |



|   |             |             |             |
|---|-------------|-------------|-------------|
| H | 3.97686800  | 0.24925900  | -0.35930300 |
| H | 3.26930500  | -1.86724800 | -0.61511400 |
| H | 1.40278200  | -2.97393700 | -0.17470800 |
| H | -0.77117400 | -2.44350500 | 0.04473000  |
| H | 0.74076500  | 0.61892000  | -1.21974000 |
| C | -0.82174700 | 2.14859600  | -0.96797800 |
| H | -1.63171800 | 2.04606400  | -1.70037700 |
| H | -1.26013600 | 2.58722200  | -0.07222400 |
| H | -0.06968800 | 2.82762800  | -1.37657900 |
| N | -2.18202600 | -0.34208100 | 0.17722200  |
| O | -2.66768000 | 0.73336800  | 0.49357400  |
| O | -2.79074600 | -1.39830700 | 0.19404900  |

1- NH<sub>2</sub>-2-CH<sub>3</sub>-substituted

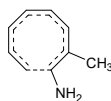

|   |             |             |             |
|---|-------------|-------------|-------------|
| C | -0.46346000 | -1.18413600 | 1.15433300  |
| C | -1.61282900 | -1.46497700 | 0.44189000  |
| C | -2.39956900 | -0.48495900 | -0.18583000 |
| C | -2.15523000 | 0.87955800  | -0.35098500 |
| C | -1.07275000 | 1.77038900  | -0.14483700 |
| C | 0.31095700  | 1.68875300  | 0.04402200  |
| C | 1.22321100  | 0.63070700  | -0.06348800 |
| C | 0.84313900  | -0.60735900 | -0.58899700 |
| H | -0.35042100 | -0.20458000 | 1.60131000  |
| H | 0.09934200  | -1.99200100 | 1.61732500  |
| H | -1.89085400 | -2.50558800 | 0.27635500  |
| H | -3.35173000 | -0.82611000 | -0.58850200 |
| H | -3.03752000 | 1.41376200  | -0.70541900 |
| H | -1.40823000 | 2.80669300  | -0.18138500 |
| H | 0.76750800  | 2.64386600  | 0.30382800  |
| H | -0.03811600 | -0.64307500 | -1.21776700 |
| N | 1.77658800  | -1.59857300 | -0.86237100 |
| H | 2.53350200  | -1.68974300 | -0.19517800 |
| H | 1.38111000  | -2.49898400 | -1.10100000 |
| C | 2.63372300  | 0.79837000  | 0.44162300  |
| H | 3.37080200  | 0.50037000  | -0.31495000 |
| H | 2.82884700  | 1.83797800  | 0.71616300  |
| H | 2.81649900  | 0.18934500  | 1.33943700  |

1- NH<sub>2</sub>-2-NH<sub>2</sub>-substituted

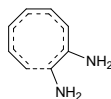

|   |             |             |             |
|---|-------------|-------------|-------------|
| C | -0.48904700 | -1.22623800 | 1.15276100  |
| C | -1.60219000 | -1.50274900 | 0.39937900  |
| C | -2.39519800 | -0.51352300 | -0.22402600 |
| C | -2.16708700 | 0.84866500  | -0.36400400 |
| C | -1.09370500 | 1.75243800  | -0.11720100 |
| C | 0.28413100  | 1.69277200  | 0.05645200  |
| C | 1.21622500  | 0.64130800  | -0.05470800 |
| C | 0.91637100  | -0.59643400 | -0.60771300 |

|   |             |             |             |
|---|-------------|-------------|-------------|
| H | -0.36745700 | -0.24462600 | 1.59253400  |
| H | 0.08913000  | -2.03098900 | 1.60075600  |
| H | -1.86027300 | -2.54222300 | 0.19919200  |
| H | -3.33894500 | -0.85990000 | -0.64247700 |
| H | -3.04458900 | 1.38037800  | -0.73311700 |
| H | -1.44567700 | 2.78378400  | -0.12683700 |
| H | 0.73708500  | 2.65311100  | 0.30607900  |
| H | 0.05777100  | -0.68111200 | -1.26088600 |
| N | 1.92133700  | -1.53913400 | -0.78950900 |
| H | 2.58206900  | -1.57032500 | -0.01778700 |
| H | 1.58699200  | -2.46315500 | -1.03341900 |
| N | 2.51944700  | 0.77815900  | 0.48941200  |
| H | 3.24911600  | 0.67198400  | -0.21385400 |
| H | 2.65227900  | 1.65247000  | 0.98485100  |

#### 1- NH<sub>2</sub>-2-OH-substituted

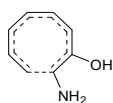

|   |             |             |             |
|---|-------------|-------------|-------------|
| C | -0.47521600 | -1.27481500 | 1.12269700  |
| C | -1.57634300 | -1.54667300 | 0.34956400  |
| C | -2.37795100 | -0.55695900 | -0.26066500 |
| C | -2.18081900 | 0.81319000  | -0.36502000 |
| C | -1.13443500 | 1.73679200  | -0.08118200 |
| C | 0.24160500  | 1.70626400  | 0.10276000  |
| C | 1.19099600  | 0.68177500  | -0.04135700 |
| C | 0.96131300  | -0.57473600 | -0.57637700 |
| H | -0.37115900 | -0.30255500 | 1.58779600  |
| H | 0.09718300  | -2.08650300 | 1.56609000  |
| H | -1.81908100 | -2.58471300 | 0.12495000  |
| H | -3.30871700 | -0.91284100 | -0.69971200 |
| H | -3.06701200 | 1.33183800  | -0.73161400 |
| H | -1.51306700 | 2.75831800  | -0.06172700 |
| H | 0.69239000  | 2.65483400  | 0.38791200  |
| H | 0.13095300  | -0.70455200 | -1.25669600 |
| N | 2.03748400  | -1.45930200 | -0.72952100 |
| H | 1.76842900  | -2.35870700 | -1.10952000 |
| H | 2.57444700  | -1.59033900 | 0.12315500  |
| O | 2.44404900  | 0.94067800  | 0.47618600  |
| H | 3.10596100  | 0.57587900  | -0.13598400 |

#### 1- NH<sub>2</sub>-2-F-substituted

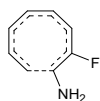

|   |             |             |             |
|---|-------------|-------------|-------------|
| C | -0.37693200 | -1.26213800 | 1.12178300  |
| C | -1.49455900 | -1.57378500 | 0.36986800  |
| C | -2.32482300 | -0.62509900 | -0.24599800 |
| C | -2.18698900 | 0.76159300  | -0.35997700 |
| C | -1.17945300 | 1.71937900  | -0.10782400 |
| C | 0.20299900  | 1.71162300  | 0.09572700  |
| C | 1.13497000  | 0.69622400  | -0.05234300 |
| C | 0.96358800  | -0.58490600 | -0.56539100 |

|   |             |             |             |
|---|-------------|-------------|-------------|
| H | -0.32402200 | -0.29843000 | 1.61263800  |
| H | 0.21215400  | -2.05836200 | 1.57137200  |
| H | -1.70878300 | -2.62156400 | 0.16161900  |
| H | -3.23963900 | -1.01911700 | -0.68563600 |
| H | -3.10204800 | 1.23744800  | -0.71299000 |
| H | -1.57757200 | 2.73305800  | -0.11754000 |
| H | 0.64346100  | 2.66037800  | 0.39481000  |
| H | 0.12279900  | -0.73581700 | -1.22930800 |
| F | 2.38482700  | 0.94713800  | 0.43999500  |
| N | 2.05754300  | -1.40417600 | -0.77404100 |
| H | 2.82857600  | -1.27130000 | -0.13106700 |
| H | 1.84602900  | -2.37865200 | -0.94064000 |

1- NH<sub>2</sub>-2-CHO-substituted

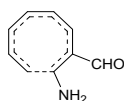

|   |             |             |             |
|---|-------------|-------------|-------------|
| C | 0.94180400  | 1.03019700  | 1.18911500  |
| C | 2.17818600  | 1.01644100  | 0.56343500  |
| C | 2.70413400  | -0.10801300 | -0.08887700 |
| C | 2.10174100  | -1.34104100 | -0.34521000 |
| C | 0.80493700  | -1.90378900 | -0.23168200 |
| C | -0.50615200 | -1.44299600 | -0.10903600 |
| C | -1.07191300 | -0.16293500 | -0.19982100 |
| C | -0.31442300 | 0.97068700  | -0.57617800 |
| H | 0.55261500  | 0.09730900  | 1.57852100  |
| H | 0.60680000  | 1.93358300  | 1.69418800  |
| H | 2.74529400  | 1.94409700  | 0.49038600  |
| H | 3.73417500  | -0.02544400 | -0.42977500 |
| H | 2.81961200  | -2.08281600 | -0.69635100 |
| H | 0.84326100  | -2.99002800 | -0.30475500 |
| H | -1.24620200 | -2.22266100 | 0.06090000  |
| H | 0.55068700  | 0.76826300  | -1.19731900 |
| N | -0.87251000 | 2.21810900  | -0.81672100 |
| H | -1.56624100 | 2.54735100  | -0.15799100 |
| H | -0.19852800 | 2.94110300  | -1.03262200 |
| C | -2.50530900 | -0.03250600 | 0.11897300  |
| H | -2.94877500 | 0.97395200  | -0.01309500 |
| O | -3.22289400 | -0.94596800 | 0.47508100  |

1-NH<sub>2</sub>-2-CN-substituted

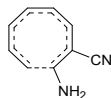

|   |             |             |             |
|---|-------------|-------------|-------------|
| C | 0.65381300  | 1.14756500  | 1.14103200  |
| C | 1.87136100  | 1.36232000  | 0.51089000  |
| C | 2.62867500  | 0.34818400  | -0.08812500 |
| C | 2.31560900  | -1.00090700 | -0.28401800 |
| C | 1.17565500  | -1.82649600 | -0.14997400 |
| C | -0.20618200 | -1.65200700 | -0.03614800 |
| C | -1.00794700 | -0.51547700 | -0.18880700 |
| C | -0.53724000 | 0.74737200  | -0.62204100 |
| H | 0.47040500  | 0.17716900  | 1.58609700  |

|   |             |             |             |
|---|-------------|-------------|-------------|
| H | 0.13046600  | 1.98402700  | 1.59836300  |
| H | 2.22836000  | 2.38436200  | 0.38798900  |
| H | 3.61843200  | 0.63644400  | -0.43645200 |
| H | 3.18464100  | -1.58196000 | -0.59300000 |
| H | 1.44381300  | -2.88156700 | -0.17797700 |
| H | -0.75792100 | -2.56264100 | 0.18602200  |
| H | 0.35440400  | 0.73429600  | -1.23690800 |
| N | -1.41464200 | 1.76893900  | -0.90619900 |
| H | -2.26755500 | 1.81321300  | -0.35894300 |
| H | -1.00747000 | 2.67396500  | -1.09647600 |
| C | -2.38651300 | -0.58290500 | 0.20346400  |
| N | -3.50549700 | -0.56082600 | 0.50957600  |

1-NH<sub>2</sub>-2-NO<sub>2</sub>-substituted

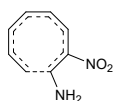

|   |             |             |             |
|---|-------------|-------------|-------------|
| C | 0.98917700  | 1.10102600  | 1.13644300  |
| C | 2.25431900  | 1.20365700  | 0.56662000  |
| C | 2.92764200  | 0.12801500  | -0.02139300 |
| C | 2.47774500  | -1.17519800 | -0.26472700 |
| C | 1.25316800  | -1.87814000 | -0.18959900 |
| C | -0.10726000 | -1.56750700 | -0.10639200 |
| C | -0.77019500 | -0.35143800 | -0.24697900 |
| C | -0.13014400 | 0.85672700  | -0.63528900 |
| H | 0.70971900  | 0.14984000  | 1.57482000  |
| H | 0.53174700  | 1.97775900  | 1.58857000  |
| H | 2.71799800  | 2.18587800  | 0.48106800  |
| H | 3.95538100  | 0.31497200  | -0.32552400 |
| H | 3.29017500  | -1.83874800 | -0.56122500 |
| H | 1.41141700  | -2.95409000 | -0.23977000 |
| H | -0.76405400 | -2.41217700 | 0.07761600  |
| H | 0.76222800  | 0.65963500  | -1.22016800 |
| N | -0.77591200 | 2.00877900  | -1.00516400 |
| H | -1.59884900 | 2.26497000  | -0.47622800 |
| H | -0.17993700 | 2.77590600  | -1.28230400 |
| N | -2.16717600 | -0.32571800 | 0.14829500  |
| O | -2.66203700 | 0.77131300  | 0.40731300  |
| O | -2.78807800 | -1.37234100 | 0.21132700  |

1-OH-2-CH<sub>3</sub>-substituted

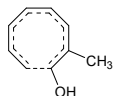

|   |             |             |             |
|---|-------------|-------------|-------------|
| C | -0.48369900 | -1.21994300 | 1.12952800  |
| C | -1.62976200 | -1.46241700 | 0.40770000  |
| C | -2.41069600 | -0.44972400 | -0.18391400 |
| C | -2.14488200 | 0.90759100  | -0.32772700 |
| C | -1.04141200 | 1.77871100  | -0.11013600 |
| C | 0.33717200  | 1.67319600  | 0.05424600  |
| C | 1.23785000  | 0.59844900  | -0.08013100 |
| C | 0.83567400  | -0.61505300 | -0.61917300 |
| H | -0.34614900 | -0.24984100 | 1.59133500  |

|   |             |             |             |
|---|-------------|-------------|-------------|
| H | 0.07980600  | -2.04825400 | 1.55197200  |
| H | -1.91305300 | -2.49324200 | 0.20046900  |
| H | -3.37279300 | -0.76689100 | -0.58257300 |
| H | -3.01763400 | 1.46485000  | -0.66933800 |
| H | -1.36306800 | 2.81997800  | -0.11343800 |
| H | 0.81465800  | 2.61657500  | 0.31832600  |
| H | -0.03453400 | -0.67055100 | -1.25870200 |
| O | 1.68900800  | -1.64605200 | -0.84961600 |
| H | 2.50496200  | -1.52570800 | -0.34086400 |
| C | 2.64602500  | 0.73556500  | 0.44873500  |
| H | 2.80372700  | 0.13390400  | 1.35571700  |
| H | 3.40091500  | 0.43588100  | -0.29050900 |
| H | 2.85348000  | 1.77346500  | 0.71976600  |

#### 1-OH-2-NH<sub>2</sub>-substituted

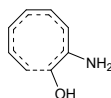

|   |             |             |             |
|---|-------------|-------------|-------------|
| C | -0.47405100 | -1.25552000 | 1.09641400  |
| C | -1.60249900 | -1.50074600 | 0.35091300  |
| C | -2.40240800 | -0.48944200 | -0.21941100 |
| C | -2.16885300 | 0.87630000  | -0.32052200 |
| C | -1.08146300 | 1.76025400  | -0.07658800 |
| C | 0.29935000  | 1.67358200  | 0.07110700  |
| C | 1.21066400  | 0.61324900  | -0.07864300 |
| C | 0.89676500  | -0.63032500 | -0.61892100 |
| H | -0.35817100 | -0.29315400 | 1.57948800  |
| H | 0.10712000  | -2.08014200 | 1.50048500  |
| H | -1.85921200 | -2.53131400 | 0.11007900  |
| H | -3.35423700 | -0.81768200 | -0.63380200 |
| H | -3.05119400 | 1.42587200  | -0.64930400 |
| H | -1.41857000 | 2.79620100  | -0.05343500 |
| H | 0.77505800  | 2.61826900  | 0.33627900  |
| H | 0.06469500  | -0.75782700 | -1.29664200 |
| O | 1.84597000  | -1.58099700 | -0.74267700 |
| H | 2.58260800  | -1.30363400 | -0.16156400 |
| N | 2.55173400  | 0.70666600  | 0.42866800  |
| H | 3.20112300  | 1.06495900  | -0.26978200 |
| H | 2.61585100  | 1.29565200  | 1.25285000  |

#### 1-OH-2-OH-substituted

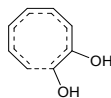

|   |             |             |             |
|---|-------------|-------------|-------------|
| C | -0.45237200 | -1.28164100 | 1.10715000  |
| C | -1.56802200 | -1.53690500 | 0.34936400  |
| C | -2.38097900 | -0.53534200 | -0.22362200 |
| C | -2.17716300 | 0.83404700  | -0.32787300 |
| C | -1.10846600 | 1.74294100  | -0.08881600 |
| C | 0.27015500  | 1.68351800  | 0.06434400  |
| C | 1.18963600  | 0.63071400  | -0.07088900 |
| C | 0.95010700  | -0.61376200 | -0.62275000 |
| H | -0.34777400 | -0.31844500 | 1.59157100  |

|   |             |             |             |
|---|-------------|-------------|-------------|
| H | 0.14083500  | -2.09912200 | 1.50816200  |
| H | -1.80774900 | -2.56959900 | 0.10088100  |
| H | -3.32562700 | -0.88123300 | -0.64047300 |
| H | -3.06906400 | 1.36326400  | -0.66321100 |
| H | -1.46440100 | 2.77248100  | -0.07809500 |
| H | 0.73886000  | 2.63802000  | 0.30646800  |
| H | 0.11868800  | -0.77676200 | -1.29213900 |
| O | 1.94737500  | -1.51518800 | -0.75581800 |
| H | 2.72251100  | -1.18141200 | -0.27079600 |
| O | 2.48459100  | 0.78065400  | 0.40112000  |
| H | 2.50061900  | 1.38765500  | 1.15377200  |

1-OH-2-F-substituted

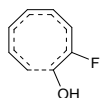

|   |             |             |             |
|---|-------------|-------------|-------------|
| C | -0.41295000 | -1.30624500 | 1.08796600  |
| C | -1.52663400 | -1.56596500 | 0.32182900  |
| C | -2.34851000 | -0.57676800 | -0.25183000 |
| C | -2.18237800 | 0.80265900  | -0.33304700 |
| C | -1.14645700 | 1.73374700  | -0.06345200 |
| C | 0.23254200  | 1.69412100  | 0.11015700  |
| C | 1.14872600  | 0.66109400  | -0.07093200 |
| C | 0.97109500  | -0.60708300 | -0.59139000 |
| H | -0.32739700 | -0.35273300 | 1.59500100  |
| H | 0.17467900  | -2.12654600 | 1.49185900  |
| H | -1.75322300 | -2.60006400 | 0.06659300  |
| H | -3.27715600 | -0.94009300 | -0.68906700 |
| H | -3.08710100 | 1.31001600  | -0.66775600 |
| H | -1.52577400 | 2.75401800  | -0.02934900 |
| H | 0.70012700  | 2.62884300  | 0.41209900  |
| H | 0.15850200  | -0.80197000 | -1.27455600 |
| F | 2.40819500  | 0.88087700  | 0.42589800  |
| O | 2.00958200  | -1.46285600 | -0.71979100 |
| H | 2.77432500  | -1.10987500 | -0.23538300 |

1-OH-2-CHO-substituted

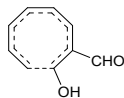

|   |             |             |             |
|---|-------------|-------------|-------------|
| C | 0.95533400  | 1.06885800  | 1.18305500  |
| C | 2.17359200  | 1.04377200  | 0.53768900  |
| C | 2.70421900  | -0.10207700 | -0.08657000 |
| C | 2.10594400  | -1.33252300 | -0.32745400 |
| C | 0.80336900  | -1.89766000 | -0.20093700 |
| C | -0.50232900 | -1.43968400 | -0.10188300 |
| C | -1.07189900 | -0.15331000 | -0.21655700 |
| C | -0.31491500 | 0.95955300  | -0.61381700 |
| H | 0.55480300  | 0.14346300  | 1.57959500  |
| H | 0.61020500  | 1.98856500  | 1.64869500  |
| H | 2.72628200  | 1.97461700  | 0.41990100  |
| H | 3.73536600  | -0.02354900 | -0.42507800 |
| H | 2.82100900  | -2.07865700 | -0.67458300 |

|   |             |             |             |
|---|-------------|-------------|-------------|
| H | 0.84700200  | -2.98547300 | -0.23900800 |
| H | -1.24532000 | -2.21466700 | 0.07525200  |
| H | 0.55865000  | 0.78959300  | -1.22985800 |
| O | -0.80491300 | 2.20496500  | -0.81875200 |
| H | -1.62758100 | 2.34921900  | -0.32918700 |
| C | -2.49604600 | -0.01424700 | 0.12910600  |
| H | -2.94129300 | 0.99868100  | 0.02619100  |
| O | -3.21793000 | -0.92220000 | 0.48528900  |

#### 1-OH-2-CN-substituted

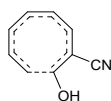

|   |             |             |             |
|---|-------------|-------------|-------------|
| C | -0.67324700 | -1.19804800 | 1.12722200  |
| C | -1.86543100 | -1.39000800 | 0.46246400  |
| C | -2.63026300 | -0.35044500 | -0.10130500 |
| C | -2.32157900 | 0.99487100  | -0.26529700 |
| C | -1.17722600 | 1.82397000  | -0.09938400 |
| C | 0.19723400  | 1.65434400  | -0.00891300 |
| C | 1.00903800  | 0.51725600  | -0.19676900 |
| C | 0.55517200  | -0.72546600 | -0.66029900 |
| H | -0.47491900 | -0.23479400 | 1.58213400  |
| H | -0.13614300 | -2.04959400 | 1.53647100  |
| H | -2.20605800 | -2.40817100 | 0.28051100  |
| H | -3.61977600 | -0.63279300 | -0.45530700 |
| H | -3.18660400 | 1.58304600  | -0.57129000 |
| H | -1.45334600 | 2.87720800  | -0.07978600 |
| H | 0.75172900  | 2.56018500  | 0.22467600  |
| H | -0.32965900 | -0.75780700 | -1.28068100 |
| O | 1.37517400  | -1.76764400 | -0.88530400 |
| H | 2.24475300  | -1.62157900 | -0.47046000 |
| C | 2.38532700  | 0.56293500  | 0.20600300  |
| N | 3.50492600  | 0.49842900  | 0.50483200  |

#### 1-OH-2-NO<sub>2</sub>-substituted

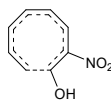

|   |             |             |             |
|---|-------------|-------------|-------------|
| C | 1.01299000  | 1.13328900  | 1.13979200  |
| C | 2.24933800  | 1.23741100  | 0.53110500  |
| C | 2.93296100  | 0.14961400  | -0.04173700 |
| C | 2.49332400  | -1.15027700 | -0.26858800 |
| C | 1.26645300  | -1.86458400 | -0.16676600 |
| C | -0.08761600 | -1.56621300 | -0.09890500 |
| C | -0.76663500 | -0.34906400 | -0.25598500 |
| C | -0.14198100 | 0.85213200  | -0.66147200 |
| H | 0.72864600  | 0.18086900  | 1.57278300  |
| H | 0.54185000  | 2.01655400  | 1.56252800  |
| H | 2.68891900  | 2.22467800  | 0.39893700  |
| H | 3.95715800  | 0.34300300  | -0.35344700 |
| H | 3.30321200  | -1.81253600 | -0.57423500 |
| H | 1.43669500  | -2.93970200 | -0.18384400 |
| H | -0.74051100 | -2.41364000 | 0.08562100  |

|   |             |             |             |
|---|-------------|-------------|-------------|
| H | 0.75205600  | 0.71045200  | -1.25709500 |
| O | -0.75675900 | 2.00492100  | -0.93020600 |
| H | -1.64465200 | 1.98008600  | -0.51375400 |
| N | -2.15896400 | -0.32598900 | 0.13638700  |
| O | -2.70049300 | 0.78266500  | 0.26276600  |
| O | -2.75070200 | -1.37029600 | 0.32283200  |

1-F-2-CH<sub>3</sub>-substituted

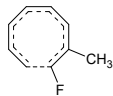

|   |             |             |             |
|---|-------------|-------------|-------------|
| C | -0.51367900 | -1.26092700 | 1.11904600  |
| C | -1.65964800 | -1.45267000 | 0.39205100  |
| C | -2.41470000 | -0.40276000 | -0.18140100 |
| C | -2.11707200 | 0.94338500  | -0.31881000 |
| C | -0.99420100 | 1.79780700  | -0.08908900 |
| C | 0.37757800  | 1.67400100  | 0.05778800  |
| C | 1.26529100  | 0.57781500  | -0.08809700 |
| C | 0.83192100  | -0.59731600 | -0.63977200 |
| H | -0.32788700 | -0.29784100 | 1.57919800  |
| H | 0.03732000  | -2.10900100 | 1.51736500  |
| H | -1.97680200 | -2.46949000 | 0.16624900  |
| H | -3.38921400 | -0.68881000 | -0.57381600 |
| H | -2.97551600 | 1.52154200  | -0.66113600 |
| H | -1.30597500 | 2.84194600  | -0.06655900 |
| H | 0.87579700  | 2.60601800  | 0.32291900  |
| H | -0.02355000 | -0.67937500 | -1.29629600 |
| F | 1.71152300  | -1.60843200 | -0.80356500 |
| C | 2.66162300  | 0.66666800  | 0.47448900  |
| H | 2.69957600  | 0.25621100  | 1.49168400  |
| H | 3.37786400  | 0.10796800  | -0.13272400 |
| H | 2.98200600  | 1.71070400  | 0.52796900  |

1-F-2-NH<sub>2</sub>-substituted

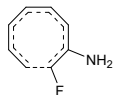

|   |             |             |             |
|---|-------------|-------------|-------------|
| C | -0.53219200 | -1.29898500 | 1.12911400  |
| C | -1.65786900 | -1.48174300 | 0.37915500  |
| C | -2.40796000 | -0.42472700 | -0.20322900 |
| C | -2.11708300 | 0.91711900  | -0.34536400 |
| C | -1.00075500 | 1.78448300  | -0.09247700 |
| C | 0.36283100  | 1.68152200  | 0.06641200  |
| C | 1.26640400  | 0.58396300  | -0.05624900 |
| C | 0.89417400  | -0.58761000 | -0.65054000 |
| H | -0.32594800 | -0.33684800 | 1.58233200  |
| H | 0.02194900  | -2.14831100 | 1.52008500  |
| H | -1.97228200 | -2.49578200 | 0.13823700  |
| H | -3.37864700 | -0.71372500 | -0.60401300 |
| H | -2.96847200 | 1.48945800  | -0.71325700 |
| H | -1.32493000 | 2.82484400  | -0.06857600 |
| H | 0.85429800  | 2.61924000  | 0.32649200  |
| H | 0.05799500  | -0.69027000 | -1.32574000 |



|   |            |             |             |
|---|------------|-------------|-------------|
| F | 1.83579400 | -1.55194700 | -0.79029700 |
| N | 2.51550200 | 0.66232700  | 0.56941000  |
| H | 3.25006200 | 0.13581000  | 0.11032400  |
| H | 2.81001100 | 1.60268200  | 0.79999200  |

1-F-OH-2-OH-substituted

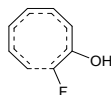

|   |             |             |             |
|---|-------------|-------------|-------------|
| C | -0.51639800 | -1.28949200 | 1.12407100  |
| C | -1.63659900 | -1.48349100 | 0.36505200  |
| C | -2.39209700 | -0.43148100 | -0.21126600 |
| C | -2.10831400 | 0.91612100  | -0.33758100 |
| C | -0.99365100 | 1.78088000  | -0.09226700 |
| C | 0.37417500  | 1.67561500  | 0.06264400  |
| C | 1.26930500  | 0.58143400  | -0.05979300 |
| C | 0.91906400  | -0.60997800 | -0.63178300 |
| H | -0.34132500 | -0.32645600 | 1.58808500  |
| H | 0.04367100  | -2.13204000 | 1.52070500  |
| H | -1.93740500 | -2.49989100 | 0.11737600  |
| H | -3.35934900 | -0.72301100 | -0.61798100 |
| H | -2.96497800 | 1.48888700  | -0.69173500 |
| H | -1.31307800 | 2.82254300  | -0.07735300 |
| H | 0.87424300  | 2.61581800  | 0.29849600  |
| H | 0.07914900  | -0.70771300 | -1.30441300 |
| F | 1.84035900  | -1.57662600 | -0.75578700 |
| O | 2.53544700  | 0.67590300  | 0.44691500  |
| H | 2.57935600  | 1.40663100  | 1.07912700  |

1-F-2-F-substituted

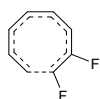

|   |             |             |             |
|---|-------------|-------------|-------------|
| C | -0.47869200 | -1.31975500 | 1.10060400  |
| C | -1.59247600 | -1.52142500 | 0.32725800  |
| C | -2.36118500 | -0.48394400 | -0.24914000 |
| C | -2.12213300 | 0.87855700  | -0.34243500 |
| C | -1.04542900 | 1.77007400  | -0.05792800 |
| C | 0.32472000  | 1.68875000  | 0.11567000  |
| C | 1.22009500  | 0.62093300  | -0.05997600 |
| C | 0.94404400  | -0.60720600 | -0.59785600 |
| H | -0.33050600 | -0.36464200 | 1.58980300  |
| H | 0.07712000  | -2.16325000 | 1.50161900  |
| H | -1.87338800 | -2.54088100 | 0.06846800  |
| H | -3.30908000 | -0.79835000 | -0.68315000 |
| H | -2.99485200 | 1.42795000  | -0.69457400 |
| H | -1.39319800 | 2.80133900  | -0.01291500 |
| H | 0.82206600  | 2.60864500  | 0.41507700  |
| H | 0.12597600  | -0.76178700 | -1.28590500 |
| F | 2.46062300  | 0.79758000  | 0.44449400  |
| F | 1.93295500  | -1.50479400 | -0.70178300 |

## 1-F-2-CHO-substituted

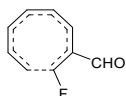

|   |             |             |             |
|---|-------------|-------------|-------------|
| C | 0.99915500  | 1.12803800  | 1.19033800  |
| C | 2.19160100  | 1.07163700  | 0.51637400  |
| C | 2.70485000  | -0.09642600 | -0.09870800 |
| C | 2.10904900  | -1.32451500 | -0.32497900 |
| C | 0.80685500  | -1.90055100 | -0.17406500 |
| C | -0.49619100 | -1.45256900 | -0.09348300 |
| C | -1.06935400 | -0.16283200 | -0.23270900 |
| C | -0.34551200 | 0.93033900  | -0.65242000 |
| H | 0.56025800  | 0.21580200  | 1.57639700  |
| H | 0.65789800  | 2.06144800  | 1.62997800  |
| H | 2.75557100  | 1.99149000  | 0.36922000  |
| H | 3.73550100  | -0.02691800 | -0.44160600 |
| H | 2.82191400  | -2.07058300 | -0.67630400 |
| H | 0.86356900  | -2.98858600 | -0.17244400 |
| H | -1.24063700 | -2.22202000 | 0.10016000  |
| H | 0.54258100  | 0.85849200  | -1.26525000 |
| F | -0.95722200 | 2.12251500  | -0.77692000 |
| C | -2.49364400 | 0.01337000  | 0.15070900  |
| H | -2.89541300 | 1.03787600  | 0.07197500  |
| O | -3.20338700 | -0.89979900 | 0.51422600  |

## 1-F-2-CN-substituted

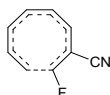

|   |             |             |             |
|---|-------------|-------------|-------------|
| C | -0.76196100 | -1.22414600 | 1.15482000  |
| C | -1.94495400 | -1.33175600 | 0.47311400  |
| C | -2.64254900 | -0.23633300 | -0.09430200 |
| C | -2.25495600 | 1.07937000  | -0.27106300 |
| C | -1.06415600 | 1.85361000  | -0.09014500 |
| C | 0.29482800  | 1.62699100  | -0.01392300 |
| C | 1.06042600  | 0.44487700  | -0.21274100 |
| C | 0.52772900  | -0.72779400 | -0.69531000 |
| H | -0.47004000 | -0.27150000 | 1.58084200  |
| H | -0.26851700 | -2.10795900 | 1.54997900  |
| H | -2.35348300 | -2.32316300 | 0.28423500  |
| H | -3.64977900 | -0.45728600 | -0.44247200 |
| H | -3.07971100 | 1.71325500  | -0.59593500 |
| H | -1.29602900 | 2.91706600  | -0.04833300 |
| H | 0.89338200  | 2.50429400  | 0.21791300  |
| H | -0.36676800 | -0.75170700 | -1.30189200 |
| F | 1.32150700  | -1.78677200 | -0.87026700 |
| C | 2.43590600  | 0.44564900  | 0.20751300  |
| N | 3.54221500  | 0.46787700  | 0.54861400  |

1-F-2-NO<sub>2</sub>-substituted

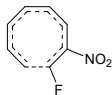

|   |             |             |             |
|---|-------------|-------------|-------------|
| C | -1.08512800 | -1.24177300 | 1.11707600  |
| C | -2.28730900 | -1.24525000 | 0.46402000  |
| C | -2.92828500 | -0.08590200 | -0.04673700 |
| C | -2.45909700 | 1.20334900  | -0.21067500 |
| C | -1.21208000 | 1.89501900  | -0.05941800 |
| C | 0.12853500  | 1.57707000  | -0.03733700 |
| C | 0.78525300  | 0.34574500  | -0.27068500 |
| C | 0.16827300  | -0.77322300 | -0.77110700 |
| H | -0.71489600 | -0.32511800 | 1.56089300  |
| H | -0.63397000 | -2.16776000 | 1.46269800  |
| H | -2.76617100 | -2.20012500 | 0.25313100  |
| H | -3.96016000 | -0.22937000 | -0.36175300 |
| H | -3.24967000 | 1.89781300  | -0.49406600 |
| H | -1.37064100 | 2.96998900  | 0.01233800  |
| H | 0.80815000  | 2.39639100  | 0.17859600  |
| H | -0.74800000 | -0.66194300 | -1.33638900 |
| F | 0.82398000  | -1.89495400 | -1.04586900 |
| N | 2.17685400  | 0.25438300  | 0.18061900  |
| O | 2.86268800  | 1.25864400  | 0.09533300  |
| O | 2.55238500  | -0.81566700 | 0.62494300  |

#### 1-CHO-2-CH<sub>3</sub>-substituted

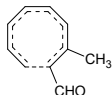

|   |             |             |             |
|---|-------------|-------------|-------------|
| C | -0.41090400 | -1.28171500 | 1.13369300  |
| C | -1.49130500 | -1.75099800 | 0.42733400  |
| C | -2.47999000 | -0.92848200 | -0.15274800 |
| C | -2.53878900 | 0.44727600  | -0.34177200 |
| C | -1.68873000 | 1.57936000  | -0.17520800 |
| C | -0.33692600 | 1.85920500  | -0.00629600 |
| C | 0.81273300  | 1.03820200  | -0.07510500 |
| C | 0.70764600  | -0.24012700 | -0.60102100 |
| H | -0.44141000 | -0.29071600 | 1.56957000  |
| H | 0.31538800  | -1.97115300 | 1.55632200  |
| H | -1.57248200 | -2.82058700 | 0.24176400  |
| H | -3.35937000 | -1.45732300 | -0.51753300 |
| H | -3.52385100 | 0.76290000  | -0.68469300 |
| H | -2.27735600 | 2.49641800  | -0.21092200 |
| H | -0.13513000 | 2.90558900  | 0.22025600  |
| H | -0.15833700 | -0.45783500 | -1.21574500 |
| C | 1.82385200  | -1.19254100 | -0.73174100 |
| H | 1.59747100  | -2.08229200 | -1.35395200 |
| O | 2.91317000  | -1.08582800 | -0.20277000 |
| C | 2.09635600  | 1.56111900  | 0.51799000  |
| H | 2.33481500  | 1.02511000  | 1.44451600  |
| H | 2.94761100  | 1.40324100  | -0.14854600 |
| H | 2.00362800  | 2.62547700  | 0.75036100  |

#### 1-CHO-2-NH<sub>2</sub>-substituted

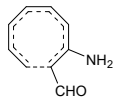

|   |             |             |             |
|---|-------------|-------------|-------------|
| C | -0.35176600 | -1.29538400 | 1.07928100  |
| C | -1.46250900 | -1.78479500 | 0.42069600  |
| C | -2.46163600 | -0.96940700 | -0.13913200 |
| C | -2.53976600 | 0.40662000  | -0.34162800 |
| C | -1.70310300 | 1.55276600  | -0.19568100 |
| C | -0.36482700 | 1.86375200  | -0.02015600 |
| C | 0.78855600  | 1.03501800  | -0.03455900 |
| C | 0.72444300  | -0.26069500 | -0.57451300 |
| H | -0.40140900 | -0.32831500 | 1.56643400  |
| H | 0.38850600  | -1.98115300 | 1.48481400  |
| H | -1.53899800 | -2.85506600 | 0.24104800  |
| H | -3.34332400 | -1.50517000 | -0.48956000 |
| H | -3.52959300 | 0.70627200  | -0.68301100 |
| H | -2.30386200 | 2.46086700  | -0.25714500 |
| H | -0.16634500 | 2.91645500  | 0.17950800  |
| H | -0.10671100 | -0.46157300 | -1.23779600 |
| C | 1.88928600  | -1.12272800 | -0.70446500 |
| H | 1.71477200  | -2.06714500 | -1.25482800 |
| O | 2.99939000  | -0.89792500 | -0.23578700 |
| N | 1.92271500  | 1.48625500  | 0.56104000  |
| H | 2.77768000  | 0.94970000  | 0.47112100  |
| H | 1.94309000  | 2.39385700  | 0.99936800  |

#### 1-CHO-2-OH-substituted

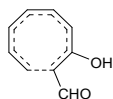

|   |             |             |             |
|---|-------------|-------------|-------------|
| C | -0.33602800 | -1.30315100 | 1.11319100  |
| C | -1.39506300 | -1.81357600 | 0.40062100  |
| C | -2.41593200 | -1.02682100 | -0.17042200 |
| C | -2.53941800 | 0.34696300  | -0.34664600 |
| C | -1.74046100 | 1.51432000  | -0.17097800 |
| C | -0.40705200 | 1.85117800  | 0.00395500  |
| C | 0.76522200  | 1.06053200  | -0.04914100 |
| C | 0.77038800  | -0.21674500 | -0.58374100 |
| H | -0.42119200 | -0.32896600 | 1.57879700  |
| H | 0.42481600  | -1.96125600 | 1.52458700  |
| H | -1.42458900 | -2.88190300 | 0.19564500  |
| H | -3.27009900 | -1.58932500 | -0.54537400 |
| H | -3.53541200 | 0.62130300  | -0.69181400 |
| H | -2.36449200 | 2.40709300  | -0.21311200 |
| H | -0.23394400 | 2.90781700  | 0.21330600  |
| H | -0.06619500 | -0.45655900 | -1.22768800 |
| C | 1.95158600  | -1.08811900 | -0.70486700 |
| H | 1.77884800  | -1.98042200 | -1.34237100 |
| O | 3.02401200  | -0.92828600 | -0.16293400 |
| O | 1.90867200  | 1.54480600  | 0.48971700  |
| H | 1.73134000  | 2.38257200  | 0.94191800  |

#### 1-CHO-2-F-substituted

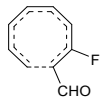

|   |             |             |             |
|---|-------------|-------------|-------------|
| C | -0.32186000 | -1.33471700 | 1.08600400  |
| C | -1.37952200 | -1.82845800 | 0.35605400  |
| C | -2.40089700 | -1.03645200 | -0.20194000 |
| C | -2.54275500 | 0.34293500  | -0.33664800 |
| C | -1.76198200 | 1.51104500  | -0.12228900 |
| C | -0.42554800 | 1.84492300  | 0.06143600  |
| C | 0.72326900  | 1.05319800  | -0.05642300 |
| C | 0.77831200  | -0.22214100 | -0.57863400 |
| H | -0.40980000 | -0.37230200 | 1.57488100  |
| H | 0.43078500  | -2.00641700 | 1.49049000  |
| H | -1.40706400 | -2.89267900 | 0.12981100  |
| H | -3.24520200 | -1.59759700 | -0.60008500 |
| H | -3.54344700 | 0.61228700  | -0.67235100 |
| H | -2.39239200 | 2.39970700  | -0.13046000 |
| H | -0.22504700 | 2.87964400  | 0.32930200  |
| H | -0.04117200 | -0.48754700 | -1.23443500 |
| F | 1.83812100  | 1.59309100  | 0.46373200  |
| C | 2.00758200  | -1.03352800 | -0.69622100 |
| H | 1.91239900  | -1.89604600 | -1.38671000 |
| O | 3.03978100  | -0.84471200 | -0.09275800 |

#### 1-CHO-2-CHO-substituted

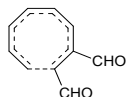

|   |             |             |             |
|---|-------------|-------------|-------------|
| C | -0.91770000 | -1.18124000 | 1.20453500  |
| C | -2.10414000 | -1.35578500 | 0.54202200  |
| C | -2.83981300 | -0.31454900 | -0.07269300 |
| C | -2.51189600 | 1.00677800  | -0.33210900 |
| C | -1.36505500 | 1.85398200  | -0.23294400 |
| C | 0.01215800  | 1.72733700  | -0.15194600 |
| C | 0.85672900  | 0.59519000  | -0.24746900 |
| C | 0.38390300  | -0.63876600 | -0.66301800 |
| H | -0.63023300 | -0.19581800 | 1.55054800  |
| H | -0.40430800 | -2.02367700 | 1.65985200  |
| H | -2.49793300 | -2.36426800 | 0.42735700  |
| H | -3.84527500 | -0.58912700 | -0.38714600 |
| H | -3.37646300 | 1.57804500  | -0.66970700 |
| H | -1.66711000 | 2.90059100  | -0.26874300 |
| H | 0.54642100  | 2.66138000  | 0.00671700  |
| H | -0.53939500 | -0.64570400 | -1.23212600 |
| C | 1.16656700  | -1.89265600 | -0.74077900 |
| H | 0.75686900  | -2.64589400 | -1.44222500 |
| O | 2.15460800  | -2.14838600 | -0.08439300 |
| C | 2.29586300  | 0.81113600  | 0.11346200  |
| H | 2.98816200  | -0.01762300 | -0.09148700 |
| O | 2.69658900  | 1.85757800  | 0.57596700  |

#### 1-CHO-2-CN-substituted

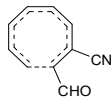

|   |             |             |             |
|---|-------------|-------------|-------------|
| C | -0.78022400 | -1.22757200 | 1.19944100  |
| C | -1.93960300 | -1.50760800 | 0.52663600  |
| C | -2.78423500 | -0.53675300 | -0.06481900 |
| C | -2.60222400 | 0.81484600  | -0.30754800 |
| C | -1.55332000 | 1.78041500  | -0.20101700 |
| C | -0.17258700 | 1.80393200  | -0.11200000 |
| C | 0.77893400  | 0.75449400  | -0.22095500 |
| C | 0.45080400  | -0.50874100 | -0.66926700 |
| H | -0.59504300 | -0.22789700 | 1.57333300  |
| H | -0.18216100 | -2.02424600 | 1.63374700  |
| H | -2.22354000 | -2.54908200 | 0.38542100  |
| H | -3.75577800 | -0.91157000 | -0.38225500 |
| H | -3.52332900 | 1.29356700  | -0.63867600 |
| H | -1.96348700 | 2.78951200  | -0.23048700 |
| H | 0.25527100  | 2.78891900  | 0.05945600  |
| H | -0.46776400 | -0.60221100 | -1.23538900 |
| C | 1.41272300  | -1.63018700 | -0.77439400 |
| H | 1.06198300  | -2.48991700 | -1.37799100 |
| O | 2.49464000  | -1.65314300 | -0.23449200 |
| C | 2.10803000  | 1.08033700  | 0.24245800  |
| N | 3.13241900  | 1.45987100  | 0.62536700  |

#### 1-CHO-2-NO<sub>2</sub>-substituted

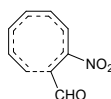

|   |             |             |             |
|---|-------------|-------------|-------------|
| C | 1.08641300  | 0.81951800  | 1.43298600  |
| C | 2.27837200  | 0.93252100  | 0.77537900  |
| C | 2.92437900  | -0.11791900 | 0.06947000  |
| C | 2.47512300  | -1.35331400 | -0.35682000 |
| C | 1.23692600  | -2.07254000 | -0.39845100 |
| C | -0.11269600 | -1.79177300 | -0.32778200 |
| C | -0.76423700 | -0.53877900 | -0.28125700 |
| C | -0.19052600 | 0.67713400  | -0.54984700 |
| H | 0.68577100  | -0.15603900 | 1.68352800  |
| H | 0.65795000  | 1.66997200  | 1.95614600  |
| H | 2.76183400  | 1.90680300  | 0.73967300  |
| H | 3.96338700  | 0.08305600  | -0.18594200 |
| H | 3.28444200  | -1.97086700 | -0.74474400 |
| H | 1.41549200  | -3.13461000 | -0.56190500 |
| H | -0.77586800 | -2.65144800 | -0.30811500 |
| H | 0.74191900  | 0.63261600  | -1.10103600 |
| C | -0.82793100 | 2.02288300  | -0.59976800 |
| H | -1.86663400 | 2.13003300  | -0.25562500 |
| O | -0.20071000 | 2.97199300  | -1.01702700 |
| N | -2.15152400 | -0.58681400 | 0.22293500  |
| O | -2.50968900 | 0.32408200  | 0.95358100  |
| O | -2.84492100 | -1.52960000 | -0.10730400 |

#### 1-CN-2-CH<sub>3</sub>-substituted

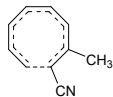

|   |             |             |             |
|---|-------------|-------------|-------------|
| C | -0.33062100 | -1.20305800 | 1.21839000  |
| C | -1.33257200 | -1.78693800 | 0.48187800  |
| C | -2.34269200 | -1.06539800 | -0.18753400 |
| C | -2.48310200 | 0.29519700  | -0.43395500 |
| C | -1.71462300 | 1.48302400  | -0.26402700 |
| C | -0.39015600 | 1.84517600  | -0.04736600 |
| C | 0.80475600  | 1.09205000  | -0.05129800 |
| C | 0.80620100  | -0.21242900 | -0.51628900 |
| H | -0.46767000 | -0.20212600 | 1.61026600  |
| H | 0.42689700  | -1.81489000 | 1.70094600  |
| H | -1.31846900 | -2.86543500 | 0.33754800  |
| H | -3.15884500 | -1.67002700 | -0.57992200 |
| H | -3.46555500 | 0.53282800  | -0.84123900 |
| H | -2.35307800 | 2.36172600  | -0.35803900 |
| H | -0.25335500 | 2.90741800  | 0.14963500  |
| H | 0.01082200  | -0.54179900 | -1.17280700 |
| C | 2.02171300  | -0.97279900 | -0.57699200 |
| N | 2.99933500  | -1.59536500 | -0.60468000 |
| C | 2.04386300  | 1.68487700  | 0.56969900  |
| H | 2.18687100  | 1.28673200  | 1.58298300  |
| H | 2.94348300  | 1.44370700  | -0.00311700 |
| H | 1.95695700  | 2.77120500  | 0.65146100  |

1-CN-2-NH<sub>2</sub>-substituted

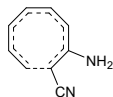

|   |             |             |             |
|---|-------------|-------------|-------------|
| C | -0.30150200 | -1.25467200 | 1.14960500  |
| C | -1.31945100 | -1.83030200 | 0.42487300  |
| C | -2.34357400 | -1.09027100 | -0.19810400 |
| C | -2.49391200 | 0.27609500  | -0.40277800 |
| C | -1.72458900 | 1.46452200  | -0.22104300 |
| C | -0.40723000 | 1.84530200  | -0.02832300 |
| C | 0.79528300  | 1.09336700  | -0.02854000 |
| C | 0.83028200  | -0.21293800 | -0.51537600 |
| H | -0.45182800 | -0.27768200 | 1.59462500  |
| H | 0.47270800  | -1.87179400 | 1.59814800  |
| H | -1.29930500 | -2.90274400 | 0.24414000  |
| H | -3.16714400 | -1.68369900 | -0.59326500 |
| H | -3.48255000 | 0.52242700  | -0.78799500 |
| H | -2.36980400 | 2.34028700  | -0.29475400 |
| H | -0.26384300 | 2.91054100  | 0.14550600  |
| H | 0.07188200  | -0.51682400 | -1.22407400 |
| C | 2.07879300  | -0.90810300 | -0.55329300 |
| N | 3.10737200  | -1.44520600 | -0.52425400 |
| N | 1.92421700  | 1.68649700  | 0.49245400  |
| H | 2.77387000  | 1.13807200  | 0.53672800  |
| H | 1.81028800  | 2.35438400  | 1.24140100  |

1-CN-2-OH-substituted

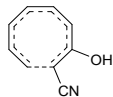

|   |             |             |             |
|---|-------------|-------------|-------------|
| C | -0.26537000 | -1.24717300 | 1.18922100  |
| C | -1.23790900 | -1.85520000 | 0.43278800  |
| C | -2.27588400 | -1.15880400 | -0.21931600 |
| C | -2.47996600 | 0.19952400  | -0.43334300 |
| C | -1.76425400 | 1.41615600  | -0.24049400 |
| C | -0.46068200 | 1.83407600  | -0.01996500 |
| C | 0.75535300  | 1.11705300  | -0.01986900 |
| C | 0.87285000  | -0.17529500 | -0.49662900 |
| H | -0.45251400 | -0.26915400 | 1.61663700  |
| H | 0.52234700  | -1.83313300 | 1.65480500  |
| H | -1.17306800 | -2.92640700 | 0.25443100  |
| H | -3.06374900 | -1.78800100 | -0.63102800 |
| H | -3.47048500 | 0.40253100  | -0.83837000 |
| H | -2.43684200 | 2.26931500  | -0.32840100 |
| H | -0.35390800 | 2.90293200  | 0.16597000  |
| H | 0.11968900  | -0.52729100 | -1.18814800 |
| C | 2.14117000  | -0.83712400 | -0.53052000 |
| N | 3.14622600  | -1.41353500 | -0.55217700 |
| O | 1.86690600  | 1.67758300  | 0.52266900  |
| H | 1.63785900  | 2.48400900  | 1.00675200  |

#### 1-CN-2-F-substituted

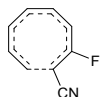

|   |             |             |             |
|---|-------------|-------------|-------------|
| C | -0.24629200 | -1.27557800 | 1.16800300  |
| C | -1.21481200 | -1.87185300 | 0.39231300  |
| C | -2.25337100 | -1.17561800 | -0.25387600 |
| C | -2.48330200 | 0.18649200  | -0.43454600 |
| C | -1.79394800 | 1.40655700  | -0.20394500 |
| C | -0.49114700 | 1.82729600  | 0.03605900  |
| C | 0.70834500  | 1.11268500  | -0.01823700 |
| C | 0.88351000  | -0.17587700 | -0.47847100 |
| H | -0.44091500 | -0.30997000 | 1.61946700  |
| H | 0.53325400  | -1.87446200 | 1.63113700  |
| H | -1.14389800 | -2.93987700 | 0.19703800  |
| H | -3.02576300 | -1.80778600 | -0.68928000 |
| H | -3.47717000 | 0.37883900  | -0.83671200 |
| H | -2.47681400 | 2.25337500  | -0.26438900 |
| H | -0.36543400 | 2.87785200  | 0.28557400  |
| H | 0.15235700  | -0.55513300 | -1.17928500 |
| C | 2.18267700  | -0.77685600 | -0.50880000 |
| F | 1.77662000  | 1.72746200  | 0.52456400  |
| N | 3.21497700  | -1.30192400 | -0.52509000 |

#### 1-CN-2-CHO-substituted



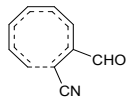

|   |             |             |             |
|---|-------------|-------------|-------------|
| C | 0.90080900  | 1.08416000  | 1.29859300  |
| C | 2.06038100  | 1.31893700  | 0.60424400  |
| C | 2.78003900  | 0.33189200  | -0.10807200 |
| C | 2.45336900  | -0.97434900 | -0.43953200 |
| C | 1.31690300  | -1.83399300 | -0.34237000 |
| C | -0.05434800 | -1.71084300 | -0.19439400 |
| C | -0.89567600 | -0.57631300 | -0.20007100 |
| C | -0.44821900 | 0.69031600  | -0.53883200 |
| H | 0.65119900  | 0.07514000  | 1.60431600  |
| H | 0.39835600  | 1.89305300  | 1.82159900  |
| H | 2.43172200  | 2.33966700  | 0.53502900  |
| H | 3.76536300  | 0.64166200  | -0.45160200 |
| H | 3.30504200  | -1.51327100 | -0.85415000 |
| H | 1.61699800  | -2.87571900 | -0.45360100 |
| H | -0.59129700 | -2.64789000 | -0.06251600 |
| H | 0.44673300  | 0.78162900  | -1.14130800 |
| C | -1.31329600 | 1.83798300  | -0.56400700 |
| N | -1.97518100 | 2.78907300  | -0.57233700 |
| C | -2.30870800 | -0.76763700 | 0.23911800  |
| H | -2.92908800 | 0.14686100  | 0.27962500  |
| O | -2.77703600 | -1.84569400 | 0.52511400  |

#### 1-CN-2-CN-substituted

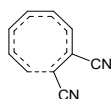

|   |             |             |             |
|---|-------------|-------------|-------------|
| C | 0.70619500  | 1.12661700  | 1.29437000  |
| C | 1.82084300  | 1.51724000  | 0.59963900  |
| C | 2.68791400  | 0.63414000  | -0.08638100 |
| C | 2.56187600  | -0.70976000 | -0.40034900 |
| C | 1.56366000  | -1.72675200 | -0.30006000 |
| C | 0.18939200  | -1.81218200 | -0.16111300 |
| C | -0.80643800 | -0.80382300 | -0.19622700 |
| C | -0.55125700 | 0.50355500  | -0.56953300 |
| H | 0.60153200  | 0.09779600  | 1.61815600  |
| H | 0.07745800  | 1.86073600  | 1.79042900  |
| H | 2.03539200  | 2.58040000  | 0.50991800  |
| H | 3.62154400  | 1.07923800  | -0.42567400 |
| H | 3.48770900  | -1.12373400 | -0.79807700 |
| H | 2.01352700  | -2.71420200 | -0.39714300 |
| H | -0.19455700 | -2.81958000 | -0.02196400 |
| H | 0.33300800  | 0.69873400  | -1.16224700 |
| C | -1.57835500 | 1.50128300  | -0.62592200 |
| N | -2.37966600 | 2.33666100  | -0.66568400 |
| C | -2.12007100 | -1.16809700 | 0.27228000  |
| N | -3.16578700 | -1.48419100 | 0.65516600  |

#### 1-CN-2-NO<sub>2</sub>-substituted

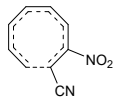

|   |             |             |             |
|---|-------------|-------------|-------------|
| C | 1.06169000  | 1.10405500  | 1.30360100  |
| C | 2.22435800  | 1.33403600  | 0.62032600  |
| C | 2.98160700  | 0.33798900  | -0.04771000 |
| C | 2.68437600  | -0.97351400 | -0.37364900 |
| C | 1.55368100  | -1.84730700 | -0.30710600 |
| C | 0.17920500  | -1.74157800 | -0.21333500 |
| C | -0.64313700 | -0.59712900 | -0.25813800 |
| C | -0.23072700 | 0.66431600  | -0.61210000 |
| H | 0.80438800  | 0.09953300  | 1.61936500  |
| H | 0.52638800  | 1.91832000  | 1.78352500  |
| H | 2.58236000  | 2.35785200  | 0.52979300  |
| H | 3.97574200  | 0.65411400  | -0.35850100 |
| H | 3.55542300  | -1.50793900 | -0.75131700 |
| H | 1.86702600  | -2.88706100 | -0.39160400 |
| H | -0.36084100 | -2.67656100 | -0.10141200 |
| H | 0.68777800  | 0.70781100  | -1.18531800 |
| C | -1.05215600 | 1.83327500  | -0.71714300 |
| N | -1.62126200 | 2.83313600  | -0.84698500 |
| N | -2.02308600 | -0.78534700 | 0.23350000  |
| O | -2.53236000 | -1.88019100 | 0.07794300  |
| O | -2.55279100 | 0.16950900  | 0.76973100  |

#### 1-NO<sub>2</sub>-2-CH<sub>3</sub>-substituted

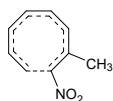

|   |             |             |             |
|---|-------------|-------------|-------------|
| C | -0.45844100 | -0.99539000 | 1.40637900  |
| C | -1.34642900 | -1.76446500 | 0.70293600  |
| C | -2.41746900 | -1.23480400 | -0.05452400 |
| C | -2.70553400 | 0.06575200  | -0.43811700 |
| C | -2.08554400 | 1.35249200  | -0.37343500 |
| C | -0.82286600 | 1.89672900  | -0.19185700 |
| C | 0.46397700  | 1.30497300  | -0.09030500 |
| C | 0.57589200  | -0.02526100 | -0.42224300 |
| H | -0.72383000 | 0.01776200  | 1.68562800  |
| H | 0.36379700  | -1.45154700 | 1.95220200  |
| H | -1.19114200 | -2.84006400 | 0.65369700  |
| H | -3.14444400 | -1.96720300 | -0.40148900 |
| H | -3.69428900 | 0.14658800  | -0.88867900 |
| H | -2.82493800 | 2.13240300  | -0.55572500 |
| H | -0.82184500 | 2.98267400  | -0.11683500 |
| H | -0.13669000 | -0.50723600 | -1.07465100 |
| N | 1.83136400  | -0.74840800 | -0.40148800 |
| O | 1.90899600  | -1.71655900 | -1.14350700 |
| O | 2.71288200  | -0.38935600 | 0.36721500  |
| C | 1.58874100  | 2.14778200  | 0.45328400  |
| H | 1.81042000  | 1.86848900  | 1.48914800  |
| H | 2.51494700  | 2.01603900  | -0.10967400 |
| H | 1.29949100  | 3.20141100  | 0.43442900  |

#### 1-NO<sub>2</sub>-2-NH<sub>2</sub>-substituted

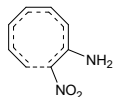

|   |             |             |             |
|---|-------------|-------------|-------------|
| C | -0.38577300 | -0.99754200 | 1.34540300  |
| C | -1.29687900 | -1.79693500 | 0.69229100  |
| C | -2.38570700 | -1.28004400 | -0.03668800 |
| C | -2.69797900 | 0.01657300  | -0.42989500 |
| C | -2.09822700 | 1.31409800  | -0.39237500 |
| C | -0.85877000 | 1.89896500  | -0.20514000 |
| C | 0.43526500  | 1.32491500  | -0.04924500 |
| C | 0.58831100  | -0.02372300 | -0.39040100 |
| H | -0.68684600 | -0.01203600 | 1.68431900  |
| H | 0.45913500  | -1.44057900 | 1.86838500  |
| H | -1.12358500 | -2.86889100 | 0.64220300  |
| H | -3.11238100 | -2.02007800 | -0.36934700 |
| H | -3.69196300 | 0.07786200  | -0.87040500 |
| H | -2.85046500 | 2.07494500  | -0.60216300 |
| H | -0.87382100 | 2.98664400  | -0.15294500 |
| H | -0.10601200 | -0.46478100 | -1.08789600 |
| N | 1.85268200  | -0.68708800 | -0.40726300 |
| O | 1.90406000  | -1.77055600 | -0.96995100 |
| O | 2.81312200  | -0.17521400 | 0.17811800  |
| N | 1.41480600  | 2.08032700  | 0.50179200  |
| H | 2.35607900  | 1.71678800  | 0.56567300  |
| H | 1.21854800  | 3.02576100  | 0.79143700  |

1-NO<sub>2</sub>-2-OH-substituted

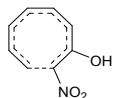

|   |             |             |             |
|---|-------------|-------------|-------------|
| C | -0.39408400 | -1.05041200 | 1.37183500  |
| C | -1.24927500 | -1.84493600 | 0.65446700  |
| C | -2.34633000 | -1.34564900 | -0.08366900 |
| C | -2.70100400 | -0.05251700 | -0.43898600 |
| C | -2.14391900 | 1.26102200  | -0.35467700 |
| C | -0.91381100 | 1.86475900  | -0.16359100 |
| C | 0.39188800  | 1.32060000  | -0.05539100 |
| C | 0.62277700  | 0.00754400  | -0.40545100 |
| H | -0.71400700 | -0.06593700 | 1.69308400  |
| H | 0.45658700  | -1.47580300 | 1.89857000  |
| H | -1.04081900 | -2.90921100 | 0.57276600  |
| H | -3.04022600 | -2.10242900 | -0.44634300 |
| H | -3.69303200 | -0.01061200 | -0.88648600 |
| H | -2.91647000 | 2.00828200  | -0.53496300 |
| H | -0.95124300 | 2.95236700  | -0.09531800 |
| H | -0.04895100 | -0.48122300 | -1.09315700 |
| N | 1.92518900  | -0.61459200 | -0.37725000 |
| O | 2.74949000  | -0.23697000 | 0.43829700  |
| O | 2.09063100  | -1.53798900 | -1.16492300 |
| O | 1.38991700  | 2.08627300  | 0.43253500  |
| H | 1.03408100  | 2.93372800  | 0.73810200  |

1-NO<sub>2</sub>-2-F-substituted

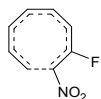

|   |             |             |             |
|---|-------------|-------------|-------------|
| C | -0.40509200 | -1.09910800 | 1.34896800  |
| C | -1.26408800 | -1.86292200 | 0.60141100  |
| C | -2.35305800 | -1.34170600 | -0.13194700 |
| C | -2.71545800 | -0.03825400 | -0.44608500 |
| C | -2.16782500 | 1.27153000  | -0.31334800 |
| C | -0.93072200 | 1.86038700  | -0.10437000 |
| C | 0.35166400  | 1.29050000  | -0.05699900 |
| C | 0.62966900  | -0.01061000 | -0.39803700 |
| H | -0.71315800 | -0.11842100 | 1.69226400  |
| H | 0.43010200  | -1.55413700 | 1.87558800  |
| H | -1.06598200 | -2.92734400 | 0.49615300  |
| H | -3.04060700 | -2.08962800 | -0.52344300 |
| H | -3.70801000 | 0.01077800  | -0.89195300 |
| H | -2.94090500 | 2.02527500  | -0.45815800 |
| H | -0.93047000 | 2.93898100  | 0.03150500  |
| H | -0.01589400 | -0.52606000 | -1.09146300 |
| F | 1.31584900  | 2.08687100  | 0.41675500  |
| N | 1.96450100  | -0.56825100 | -0.35590500 |
| O | 2.19358000  | -1.46194100 | -1.15867200 |
| O | 2.74645100  | -0.16086300 | 0.48523400  |

#### 1-NO<sub>2</sub>-2-CHO-substituted

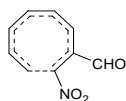

|   |             |             |             |
|---|-------------|-------------|-------------|
| C | -0.90239700 | -0.89508900 | 1.46751400  |
| C | -1.99070400 | -1.36753200 | 0.79200600  |
| C | -2.84530300 | -0.56378200 | -0.00906900 |
| C | -2.71023300 | 0.73661700  | -0.45639200 |
| C | -1.71150900 | 1.76516800  | -0.43215000 |
| C | -0.33942600 | 1.86532300  | -0.30974000 |
| C | 0.67461800  | 0.87254700  | -0.23579100 |
| C | 0.37058700  | -0.44404300 | -0.47432900 |
| H | -0.79451400 | 0.16695200  | 1.65619800  |
| H | -0.27272200 | -1.56139200 | 2.05131100  |
| H | -2.19940000 | -2.43536700 | 0.80964200  |
| H | -3.77122200 | -1.04538100 | -0.31828600 |
| H | -3.62480600 | 1.10734900  | -0.91850900 |
| H | -2.16803200 | 2.73846800  | -0.61051500 |
| H | 0.04645500  | 2.88095700  | -0.27346300 |
| H | -0.47942000 | -0.74187800 | -1.07019200 |
| N | 1.34871300  | -1.51533900 | -0.37486900 |
| O | 1.18234400  | -2.46765700 | -1.11848000 |
| O | 2.23790400  | -1.42098500 | 0.45932900  |
| C | 2.05710400  | 1.36700700  | 0.09361700  |
| H | 2.89719900  | 0.68615700  | -0.10048300 |
| O | 2.24338300  | 2.48792000  | 0.50719900  |

#### 1-NO<sub>2</sub>-2-CN-substituted

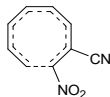

|   |             |             |             |
|---|-------------|-------------|-------------|
| C | -0.81436800 | -0.89603100 | 1.47611800  |
| C | -1.86950800 | -1.43242600 | 0.79641600  |
| C | -2.79383100 | -0.67961900 | 0.02313300  |
| C | -2.76087500 | 0.62859700  | -0.41892500 |
| C | -1.83939500 | 1.72740500  | -0.41156300 |
| C | -0.48003700 | 1.93326400  | -0.29574700 |
| C | 0.59866700  | 1.00304700  | -0.22230300 |
| C | 0.39828700  | -0.32757500 | -0.47991400 |
| H | -0.78298100 | 0.16597600  | 1.69217300  |
| H | -0.13148500 | -1.52859400 | 2.03754400  |
| H | -1.99565000 | -2.51306900 | 0.79035800  |
| H | -3.68863400 | -1.22331200 | -0.27424900 |
| H | -3.70669800 | 0.93388900  | -0.86509300 |
| H | -2.36520700 | 2.66456800  | -0.59120600 |
| H | -0.17357600 | 2.97547500  | -0.26541200 |
| H | -0.44090100 | -0.66280100 | -1.06941800 |
| N | 1.45895400  | -1.31837100 | -0.42414100 |
| O | 1.25522100  | -2.34690600 | -1.05041200 |
| O | 2.44279100  | -1.08251800 | 0.25315500  |
| C | 1.86017800  | 1.55146400  | 0.21042500  |
| N | 2.81337900  | 2.11472800  | 0.54664400  |

1-NO<sub>2</sub>-2-NO<sub>2</sub>-substituted

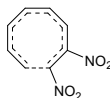

|   |             |             |             |
|---|-------------|-------------|-------------|
| C | 1.15677500  | 0.88981100  | 1.43513900  |
| C | 2.27172900  | 1.30137900  | 0.75858900  |
| C | 3.08118800  | 0.46059900  | -0.04570600 |
| C | 2.88935800  | -0.83285000 | -0.50166500 |
| C | 1.84636600  | -1.80800400 | -0.48565700 |
| C | 0.47111900  | -1.83554100 | -0.34106900 |
| C | -0.45195300 | -0.77541300 | -0.27769200 |
| C | -0.15536700 | 0.54016700  | -0.48816000 |
| H | 0.99046600  | -0.16255100 | 1.63670800  |
| H | 0.56886500  | 1.59224900  | 2.02041300  |
| H | 2.53800700  | 2.35616900  | 0.78069500  |
| H | 4.02809600  | 0.89893900  | -0.35590300 |
| H | 3.78797600  | -1.24316700 | -0.96055500 |
| H | 2.24504000  | -2.80246500 | -0.68243100 |
| H | 0.02599600  | -2.82588300 | -0.29116700 |
| H | 0.68343200  | 0.82837500  | -1.10323000 |
| N | -1.13385600 | 1.60491500  | -0.33031600 |
| O | -1.00242100 | 2.56299400  | -1.07235200 |
| O | -1.96547800 | 1.49337100  | 0.55203300  |
| N | -1.82044800 | -1.18140100 | 0.12453600  |
| O | -1.91535900 | -1.79049600 | 1.17251700  |
| O | -2.72212300 | -0.92176400 | -0.64304200 |

5.3.2 1,3-substituted

1-CH<sub>3</sub>-3-CH<sub>3</sub>-substituted

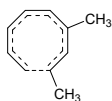

|   |             |             |             |
|---|-------------|-------------|-------------|
| C | -1.49289800 | -0.01405300 | 1.20283200  |
| C | -2.04293700 | 0.97296800  | 0.41887500  |
| C | -1.28509400 | 1.93883700  | -0.27526200 |
| C | 0.08537600  | 2.02896100  | -0.48757800 |
| C | 1.25296600  | 1.24259400  | -0.25806000 |
| C | 1.57825100  | -0.08623200 | 0.00971500  |
| C | 0.72325800  | -1.21267700 | -0.00424500 |
| C | -0.57049400 | -1.23241600 | -0.47585700 |
| H | -0.50532200 | 0.13166700  | 1.62020400  |
| H | -2.13184800 | -0.73031000 | 1.71381300  |
| H | -3.11868400 | 0.97368100  | 0.24788100  |
| H | -1.85757300 | 2.75376200  | -0.71551500 |
| H | 0.36110800  | 2.98926800  | -0.92495700 |
| H | 2.14328200  | 1.86508700  | -0.35308200 |
| H | -0.86000300 | -0.43732000 | -1.15497900 |
| C | -1.37644800 | -2.49986100 | -0.55396600 |
| H | -1.09345300 | -3.19980900 | 0.23860600  |
| H | -2.44857800 | -2.29740200 | -0.47146900 |
| H | -1.21157900 | -2.99592800 | -1.51874700 |
| H | 1.11275700  | -2.12618700 | 0.45129700  |
| C | 3.02805800  | -0.38828400 | 0.34729600  |
| H | 3.46440000  | -1.09383200 | -0.36823100 |
| H | 3.64212200  | 0.51528900  | 0.35217700  |
| H | 3.10314300  | -0.84699300 | 1.34049800  |

1-CH<sub>3</sub>-3-NH<sub>2</sub>-substituted

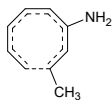

|   |             |             |             |
|---|-------------|-------------|-------------|
| C | -1.51580400 | 0.03602000  | 1.20144400  |
| C | -1.99180600 | 1.05383100  | 0.40809800  |
| C | -1.18039100 | 1.98236100  | -0.27499400 |
| C | 0.19804500  | 2.01132100  | -0.47582000 |
| C | 1.32702600  | 1.17889600  | -0.27154800 |
| C | 1.59182900  | -0.16497500 | 0.02320300  |
| C | 0.69520500  | -1.25851100 | 0.01105300  |
| C | -0.59075800 | -1.20718500 | -0.47472700 |
| H | -0.52794700 | 0.11809100  | 1.63441400  |
| H | -2.20705400 | -0.63797700 | 1.70181800  |
| H | -3.06415400 | 1.11552800  | 0.22398700  |
| H | -1.70856600 | 2.82267200  | -0.72175200 |
| H | 0.51449900  | 2.95950300  | -0.91210200 |
| H | 2.25459400  | 1.73247900  | -0.42304200 |
| H | -0.83136300 | -0.39526600 | -1.15358600 |
| C | -1.45861900 | -2.43178000 | -0.56589700 |
| H | -1.24478300 | -3.13307600 | 0.24678800  |
| H | -2.52030700 | -2.17174200 | -0.52980800 |

|   |             |             |             |
|---|-------------|-------------|-------------|
| H | -1.27956500 | -2.95035100 | -1.51640800 |
| H | 1.03084500  | -2.18023500 | 0.49055600  |
| N | 2.94198400  | -0.46823300 | 0.28684600  |
| H | 3.11081500  | -1.41219300 | 0.60943600  |
| H | 3.43073000  | 0.21032300  | 0.85691000  |

1-CH<sub>3</sub>-3-OH-substituted

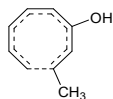

|   |             |             |             |
|---|-------------|-------------|-------------|
| C | -1.50870500 | 0.07509900  | 1.18233500  |
| C | -1.95898700 | 1.09236900  | 0.37522400  |
| C | -1.12294500 | 2.00991600  | -0.29633800 |
| C | 0.25739600  | 2.02380000  | -0.46305000 |
| C | 1.36439700  | 1.16780000  | -0.22384000 |
| C | 1.57826100  | -0.18137400 | 0.03865800  |
| C | 0.68272700  | -1.27224000 | 0.01957100  |
| C | -0.60082500 | -1.21273100 | -0.47208300 |
| H | -0.52334000 | 0.14416600  | 1.62414700  |
| H | -2.21565700 | -0.58520200 | 1.67872500  |
| H | -3.02715400 | 1.16741900  | 0.17363400  |
| H | -1.63280000 | 2.85672900  | -0.75204000 |
| H | 0.60231100  | 2.96775500  | -0.88560900 |
| H | 2.31612000  | 1.69107600  | -0.30184300 |
| H | -0.82811900 | -0.40635800 | -1.16161000 |
| C | -1.48268200 | -2.42791500 | -0.55137100 |
| H | -1.27677600 | -3.12384100 | 0.26778400  |
| H | -2.54103800 | -2.15466700 | -0.51697800 |
| H | -1.31145000 | -2.95713600 | -1.49734900 |
| H | 1.01055500  | -2.18794700 | 0.51695500  |
| O | 2.88959200  | -0.45707400 | 0.36639300  |
| H | 3.05877600  | -1.40375400 | 0.26840200  |

1-CH<sub>3</sub>-3-F-substituted

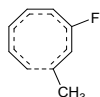

|   |             |             |             |
|---|-------------|-------------|-------------|
| C | -1.46239500 | 0.28599300  | 1.17273400  |
| C | -1.75890100 | 1.35847000  | 0.36514600  |
| C | -0.80072400 | 2.15238200  | -0.30137800 |
| C | 0.56683000  | 1.97626000  | -0.46526500 |
| C | 1.52828600  | 0.96179200  | -0.20988800 |
| C | 1.50548000  | -0.39892500 | 0.03169300  |
| C | 0.49671600  | -1.37299400 | 0.01223300  |
| C | -0.77282900 | -1.14026100 | -0.46813700 |
| H | -0.48161600 | 0.21089500  | 1.62370700  |
| H | -2.26062100 | -0.26414200 | 1.66455300  |
| H | -2.80467600 | 1.58278600  | 0.15858400  |
| H | -1.18802100 | 3.06338300  | -0.75403800 |
| H | 1.04825100  | 2.85967600  | -0.88405500 |
| H | 2.55291100  | 1.32700800  | -0.25878400 |
| H | -0.89484000 | -0.31530800 | -1.16170700 |
| C | -1.81006200 | -2.22625000 | -0.53455600 |

|   |             |             |             |
|---|-------------|-------------|-------------|
| H | -1.68173400 | -2.94965600 | 0.27619900  |
| H | -2.82195000 | -1.81517600 | -0.47754000 |
| H | -1.72879700 | -2.76575900 | -1.48648500 |
| H | 0.74024200  | -2.32351700 | 0.48441900  |
| F | 2.72960400  | -0.90988700 | 0.35551800  |

1-CH<sub>3</sub>-3-CHO-substituted

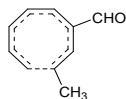

|   |             |             |             |
|---|-------------|-------------|-------------|
| C | -1.72534200 | 0.19632000  | 1.24924800  |
| C | -2.18198500 | 1.20990000  | 0.44661400  |
| C | -1.34130100 | 2.08155000  | -0.28123400 |
| C | 0.02421300  | 2.02335400  | -0.52530100 |
| C | 1.07955200  | 1.09540800  | -0.31089100 |
| C | 1.21585200  | -0.26415900 | -0.04739200 |
| C | 0.25616300  | -1.30923300 | -0.02868400 |
| C | -1.03213800 | -1.22422000 | -0.49026600 |
| H | -0.70614300 | 0.21934100  | 1.61303700  |
| H | -2.42118700 | -0.44159300 | 1.78797900  |
| H | -3.25506800 | 1.32723800  | 0.30389200  |
| H | -1.83505900 | 2.95088600  | -0.71274600 |
| H | 0.40280900  | 2.94465000  | -0.96763900 |
| H | 2.05703900  | 1.56910400  | -0.40725000 |
| H | -1.27335300 | -0.39972000 | -1.15240800 |
| C | -1.97034600 | -2.39660600 | -0.50742400 |
| H | -1.70041700 | -3.13423800 | 0.25453000  |
| H | -3.00465100 | -2.08254700 | -0.33623400 |
| H | -1.94079400 | -2.89194400 | -1.48600000 |
| H | 0.57031100  | -2.24632900 | 0.43717700  |
| C | 2.60859400  | -0.71631600 | 0.24657900  |
| H | 2.69506500  | -1.78854000 | 0.52120000  |
| O | 3.60148300  | -0.02528600 | 0.20462100  |

1-CH<sub>3</sub>-3-CN-substituted

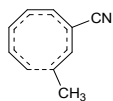

|   |             |             |             |
|---|-------------|-------------|-------------|
| C | 1.63458600  | 0.10583300  | 1.26130100  |
| C | 2.30386900  | -0.81070000 | 0.48898900  |
| C | 1.67076000  | -1.84671100 | -0.23115700 |
| C | 0.32737800  | -2.06579800 | -0.50404700 |
| C | -0.90343800 | -1.37337000 | -0.33337700 |
| C | -1.31171300 | -0.06092700 | -0.09084700 |
| C | -0.58043000 | 1.15609000  | -0.06071500 |
| C | 0.71266300  | 1.29538500  | -0.49938700 |
| H | 0.64182400  | -0.12477400 | 1.62593700  |
| H | 2.17718400  | 0.88195100  | 1.79460700  |
| H | 3.38040500  | -0.70813700 | 0.36224000  |
| H | 2.33690200  | -2.60637800 | -0.63641900 |
| H | 0.15220600  | -3.04891800 | -0.93961800 |
| H | -1.75050600 | -2.04672100 | -0.45475400 |
| H | 1.10079600  | 0.52478500  | -1.15684100 |



|   |             |            |             |
|---|-------------|------------|-------------|
| C | 1.41741400  | 2.62118900 | -0.52893000 |
| H | 1.02152500  | 3.30079900 | 0.23141900  |
| H | 2.49310800  | 2.50390600 | -0.36714300 |
| H | 1.28601700  | 3.09443100 | -1.50973100 |
| H | -1.07816800 | 2.01326400 | 0.39147700  |
| C | -2.72845600 | 0.08854200 | 0.16677600  |
| N | -3.85958300 | 0.22265700 | 0.37816900  |

1-CH<sub>3</sub>-3-NO<sub>2</sub>-substituted

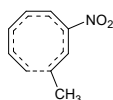

|   |             |             |             |
|---|-------------|-------------|-------------|
| C | 1.94553600  | 0.13074600  | 1.25598300  |
| C | 2.62477000  | -0.80923300 | 0.52152100  |
| C | 1.99869700  | -1.86897800 | -0.16899500 |
| C | 0.65834200  | -2.09330400 | -0.45138900 |
| C | -0.57125000 | -1.39033900 | -0.32206300 |
| C | -0.96028800 | -0.07657200 | -0.12700500 |
| C | -0.24788900 | 1.14214900  | -0.11611900 |
| C | 1.04674700  | 1.25880200  | -0.55604900 |
| H | 0.95133300  | -0.09136500 | 1.62204900  |
| H | 2.47986900  | 0.92838700  | 1.76527600  |
| H | 3.70216500  | -0.70870900 | 0.40157400  |
| H | 2.66739600  | -2.64367900 | -0.54021000 |
| H | 0.48459300  | -3.08896000 | -0.85717000 |
| H | -1.42708500 | -2.04898000 | -0.43795800 |
| H | 1.43810900  | 0.46999600  | -1.18978300 |
| C | 1.76026900  | 2.57913400  | -0.61201900 |
| H | 1.36603600  | 3.27695900  | 0.13227000  |
| H | 2.83496100  | 2.45869200  | -0.44576200 |
| H | 1.63336700  | 3.03164300  | -1.60314800 |
| H | -0.74659500 | 2.00359200  | 0.31759900  |
| N | -2.43081900 | 0.08855100  | 0.11861100  |
| O | -2.81917100 | 1.18651200  | 0.48076200  |
| O | -3.16808000 | -0.86674400 | -0.04803700 |

1-NH<sub>2</sub>-3-CH<sub>3</sub>-substituted

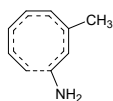

|   |             |             |             |
|---|-------------|-------------|-------------|
| C | -1.43644900 | -0.09278600 | 1.22164500  |
| C | -2.06529800 | 0.87200500  | 0.45664900  |
| C | -1.38152700 | 1.85358500  | -0.27540400 |
| C | -0.00785600 | 2.01049800  | -0.49165900 |
| C | 1.17775700  | 1.27516500  | -0.26768800 |
| C | 1.55044000  | -0.05205700 | 0.01361300  |
| C | 0.76278600  | -1.20552500 | -0.02380200 |
| C | -0.55583900 | -1.26711200 | -0.47726600 |
| H | -0.45272300 | 0.11602600  | 1.62129200  |
| H | -2.02855200 | -0.82586100 | 1.76528100  |
| H | -3.14737400 | 0.82646100  | 0.33423600  |
| H | -1.99919000 | 2.62809900  | -0.72633600 |
| H | 0.22117400  | 2.98345800  | -0.92870300 |

|   |             |             |             |
|---|-------------|-------------|-------------|
| H | 2.05389200  | 1.91580100  | -0.38478000 |
| H | -0.90404500 | -0.48818600 | -1.14526000 |
| N | -1.19804400 | -2.48638400 | -0.64412000 |
| H | -0.94868400 | -3.20298800 | 0.02754700  |
| H | -2.19967300 | -2.42982000 | -0.77650100 |
| H | 1.19988100  | -2.12843200 | 0.35899600  |
| C | 3.01940100  | -0.24601600 | 0.35333300  |
| H | 3.31102600  | 0.35333600  | 1.22215700  |
| H | 3.24714900  | -1.29288300 | 0.57015600  |
| H | 3.65293800  | 0.06314200  | -0.48577300 |

1- NH<sub>2</sub>-3-NH<sub>2</sub>-substituted

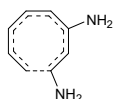

|   |             |             |             |
|---|-------------|-------------|-------------|
| C | -1.44622800 | -0.10047400 | 1.17301900  |
| C | -2.03162000 | 0.91969300  | 0.43337000  |
| C | -1.30732500 | 1.89151000  | -0.26068500 |
| C | 0.07948900  | 2.01048500  | -0.45551800 |
| C | 1.24115900  | 1.24423300  | -0.26283600 |
| C | 1.57090600  | -0.10177900 | 0.02750600  |
| C | 0.75065500  | -1.22802700 | -0.01485800 |
| C | -0.57437100 | -1.22478600 | -0.46346800 |
| H | -0.48242500 | 0.08394300  | 1.62995900  |
| H | -2.08135900 | -0.81627600 | 1.69138100  |
| H | -3.11268600 | 0.91591700  | 0.29302000  |
| H | -1.88986400 | 2.69273500  | -0.71087600 |
| H | 0.33830100  | 2.98444800  | -0.87301100 |
| H | 2.13704500  | 1.84765000  | -0.41509300 |
| H | -0.86784300 | -0.44698800 | -1.16028700 |
| N | -1.25134700 | -2.43036400 | -0.65035900 |
| H | -1.04315500 | -3.14100700 | 0.04230800  |
| H | -2.25119600 | -2.33085100 | -0.77617600 |
| H | 1.14930300  | -2.15094000 | 0.40713800  |
| N | 2.90384200  | -0.34109900 | 0.43031300  |
| H | 3.32451400  | -1.16349400 | 0.01445600  |
| H | 3.51590500  | 0.45997000  | 0.33832400  |

1- NH<sub>2</sub>-3-OH-substituted

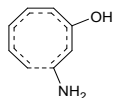

|   |             |             |             |
|---|-------------|-------------|-------------|
| C | -1.43413300 | -0.00184800 | 1.16887700  |
| C | -1.94516900 | 1.05526500  | 0.42633200  |
| C | -1.15656200 | 1.97735500  | -0.26617100 |
| C | 0.23445100  | 2.00466900  | -0.45747700 |
| C | 1.33391500  | 1.15431900  | -0.25395200 |
| C | 1.54895900  | -0.21224200 | 0.02439100  |
| C | 0.67839600  | -1.29091300 | -0.02348200 |
| C | -0.64937700 | -1.20363500 | -0.46080700 |
| H | -0.46004600 | 0.11491600  | 1.62573200  |
| H | -2.11898200 | -0.66841300 | 1.68925500  |
| H | -3.02359900 | 1.12516500  | 0.28377800  |

|   |             |             |             |
|---|-------------|-------------|-------------|
| H | -1.68386600 | 2.81549600  | -0.71692300 |
| H | 0.56443800  | 2.95735400  | -0.87284800 |
| H | 2.27883100  | 1.68016400  | -0.40462500 |
| H | -0.89806900 | -0.41244300 | -1.15952000 |
| N | -1.40005600 | -2.36274700 | -0.63355000 |
| H | -1.22613900 | -3.09048000 | 0.05013600  |
| H | -2.39178600 | -2.21040800 | -0.76603900 |
| H | 1.05315000  | -2.23663200 | 0.36314300  |
| O | 2.83602300  | -0.58014100 | 0.35404200  |
| H | 3.35539200  | 0.20782000  | 0.56416600  |

1- NH<sub>2</sub>-3-F-substituted

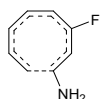

|   |             |             |             |
|---|-------------|-------------|-------------|
| C | -1.43413300 | -0.00184800 | 1.16887700  |
| C | -1.94516900 | 1.05526500  | 0.42633200  |
| C | -1.15656200 | 1.97735500  | -0.26617100 |
| C | 0.23445100  | 2.00466900  | -0.45747700 |
| C | 1.33391500  | 1.15431900  | -0.25395200 |
| C | 1.54895900  | -0.21224200 | 0.02439100  |
| C | 0.67839600  | -1.29091300 | -0.02348200 |
| C | -0.64937700 | -1.20363500 | -0.46080700 |
| H | -0.46004600 | 0.11491600  | 1.62573200  |
| H | -2.11898200 | -0.66841300 | 1.68925500  |
| H | -3.02359900 | 1.12516500  | 0.28377800  |
| H | -1.68386600 | 2.81549600  | -0.71692300 |
| H | 0.56443800  | 2.95735400  | -0.87284800 |
| H | 2.27883100  | 1.68016400  | -0.40462500 |
| H | -0.89806900 | -0.41244300 | -1.15952000 |
| N | -1.40005600 | -2.36274700 | -0.63355000 |
| H | -1.22613900 | -3.09048000 | 0.05013600  |
| H | -2.39178600 | -2.21040800 | -0.76603900 |
| H | 1.05315000  | -2.23663200 | 0.36314300  |
| O | 2.83602300  | -0.58014100 | 0.35404200  |
| H | 3.35539200  | 0.20782000  | 0.56416600  |

1- NH<sub>2</sub>-3-CHO-substituted

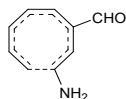

|   |             |             |             |
|---|-------------|-------------|-------------|
| C | -1.65919800 | 0.09599400  | 1.23910900  |
| C | -2.19013100 | 1.12523300  | 0.48255400  |
| C | -1.41424400 | 2.02548300  | -0.25939100 |
| C | -0.03642900 | 2.02118400  | -0.50598600 |
| C | 1.03495800  | 1.12657700  | -0.31639600 |
| C | 1.19656900  | -0.24372000 | -0.05714300 |
| C | 0.27940500  | -1.30334900 | -0.05707700 |
| C | -1.04445100 | -1.23136400 | -0.48265100 |
| H | -0.64814900 | 0.19139000  | 1.61393800  |
| H | -2.31855300 | -0.56446800 | 1.79748500  |
| H | -3.27247200 | 1.20452400  | 0.38626200  |
| H | -1.94757100 | 2.87068200  | -0.69080600 |

|   |             |             |             |
|---|-------------|-------------|-------------|
| H | 0.30890800  | 2.96462700  | -0.92910700 |
| H | 2.00341000  | 1.61167400  | -0.43457900 |
| H | -1.32685900 | -0.42748400 | -1.15097500 |
| N | -1.83366600 | -2.36335500 | -0.58767200 |
| H | -1.65254800 | -3.09670400 | 0.08717700  |
| H | -2.82287700 | -2.19956600 | -0.71989500 |
| H | 0.62869500  | -2.26197400 | 0.33172700  |
| C | 2.59685000  | -0.67110100 | 0.23505200  |
| H | 2.70514900  | -1.74594900 | 0.49292400  |
| O | 3.57481900  | 0.04088900  | 0.20764000  |

1-NH<sub>2</sub>-3-CN-substituted

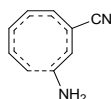

|   |             |             |             |
|---|-------------|-------------|-------------|
| C | 1.54696200  | 0.18588400  | 1.24537100  |
| C | 2.29284600  | -0.73762400 | 0.52910300  |
| C | 1.72789200  | -1.78425400 | -0.20652200 |
| C | 0.38146800  | -2.05215400 | -0.48583100 |
| C | -0.85354600 | -1.39085600 | -0.34310200 |
| C | -1.28526700 | -0.06976400 | -0.10269700 |
| C | -0.59549700 | 1.14820600  | -0.09352600 |
| C | 0.73571800  | 1.30328400  | -0.48651100 |
| H | 0.57589200  | -0.11168300 | 1.62021400  |
| H | 2.05111600  | 0.97295000  | 1.80122500  |
| H | 3.37142100  | -0.60289400 | 0.45664500  |
| H | 2.42511900  | -2.51573900 | -0.61005500 |
| H | 0.23942200  | -3.04890700 | -0.90265400 |
| H | -1.69221600 | -2.06827400 | -0.49179000 |
| H | 1.15837100  | 0.55888600  | -1.15036800 |
| N | 1.29959300  | 2.56023000  | -0.60925400 |
| H | 0.97474300  | 3.26242700  | 0.04452300  |
| H | 2.30284600  | 2.58473000  | -0.73393500 |
| H | -1.12946000 | 2.02398600  | 0.27161200  |
| C | -2.70358200 | 0.05148300  | 0.16164900  |
| N | -3.83662400 | 0.15681200  | 0.37882200  |

1-NH<sub>2</sub>-3-NO<sub>2</sub>-substituted

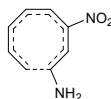

|   |             |             |             |
|---|-------------|-------------|-------------|
| C | 1.85306800  | 0.21960300  | 1.23461500  |
| C | 2.60697500  | -0.73478400 | 0.56630700  |
| C | 2.04799100  | -1.80776200 | -0.13253100 |
| C | 0.70394500  | -2.08021400 | -0.42246900 |
| C | -0.52896000 | -1.40816600 | -0.32836400 |
| C | -0.93633100 | -0.08369100 | -0.13859400 |
| C | -0.25935600 | 1.13139900  | -0.15393400 |
| C | 1.07339500  | 1.26314700  | -0.54857100 |
| H | 0.88195000  | -0.06477100 | 1.61963600  |
| H | 2.35198900  | 1.03047900  | 1.76002200  |
| H | 3.68646000  | -0.60440900 | 0.50156300  |
| H | 2.74700100  | -2.55724600 | -0.49828000 |

|   |             |             |             |
|---|-------------|-------------|-------------|
| H | 0.56334400  | -3.09103800 | -0.80351000 |
| H | -1.37571400 | -2.07130400 | -0.47401600 |
| H | 1.50056500  | 0.49572500  | -1.18264200 |
| N | 1.64149600  | 2.51331800  | -0.71060900 |
| H | 1.30517200  | 3.24215800  | -0.09285600 |
| H | 2.64619800  | 2.53336900  | -0.82343700 |
| H | -0.79549400 | 2.01016300  | 0.19126700  |
| N | -2.40652600 | 0.06454800  | 0.11716300  |
| O | -3.13521200 | -0.88946100 | -0.08668600 |
| O | -2.80486500 | 1.14378900  | 0.52388800  |

1-OH-3-CH<sub>3</sub>-substituted

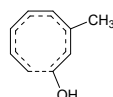

|   |             |             |             |
|---|-------------|-------------|-------------|
| C | 1.44305600  | 0.23429700  | 1.18849000  |
| C | 2.13959500  | -0.69181900 | 0.43814400  |
| C | 1.52680500  | -1.74874900 | -0.25444200 |
| C | 0.17319300  | -2.01397600 | -0.46388700 |
| C | -1.07236200 | -1.36938500 | -0.24861300 |
| C | -1.54572300 | -0.07395000 | -0.00419300 |
| C | -0.84259500 | 1.13883000  | -0.06528100 |
| C | 0.46575600  | 1.29495200  | -0.49987200 |
| H | 0.48739500  | -0.05058200 | 1.61037800  |
| H | 1.97572600  | 1.03775900  | 1.69079000  |
| H | 3.20854200  | -0.54998400 | 0.28539400  |
| H | 2.20095300  | -2.48421900 | -0.68955300 |
| H | 0.01803200  | -3.00794300 | -0.88500100 |
| H | -1.88902500 | -2.08482900 | -0.34362400 |
| H | 0.90328700  | 0.58179900  | -1.18526000 |
| O | 1.05387900  | 2.51630000  | -0.60954500 |
| H | 0.54570500  | 3.17185700  | -0.10749400 |
| H | -1.35085100 | 2.02872900  | 0.31403400  |
| C | -3.01286200 | 0.05580900  | 0.36965700  |
| H | -3.12016600 | 0.25009700  | 1.44405900  |
| H | -3.49432500 | 0.88103600  | -0.16405800 |
| H | -3.56548900 | -0.86017000 | 0.14667100  |

1-OH-3-NH<sub>2</sub>-substituted

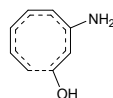

|   |             |             |             |
|---|-------------|-------------|-------------|
| C | 1.47154700  | 0.22207300  | 1.17961100  |
| C | 2.12165100  | -0.73066700 | 0.41996800  |
| C | 1.47166400  | -1.77329100 | -0.25802600 |
| C | 0.10591000  | -2.00826000 | -0.44766400 |
| C | -1.12162500 | -1.34186600 | -0.24893500 |
| C | -1.56676700 | -0.03425700 | 0.02129600  |
| C | -0.84572100 | 1.16803200  | -0.03881600 |
| C | 0.45956000  | 1.27868000  | -0.49551500 |
| H | 0.51667700  | -0.02705700 | 1.62485100  |
| H | 2.04248600  | 1.00742100  | 1.66848500  |
| H | 3.19221200  | -0.62294900 | 0.24896600  |

|   |             |             |             |
|---|-------------|-------------|-------------|
| H | 2.11920300  | -2.52564400 | -0.70361100 |
| H | -0.07246100 | -2.99949500 | -0.86610500 |
| H | -1.96785500 | -2.01304200 | -0.39654500 |
| H | 0.86201700  | 0.54911300  | -1.18599100 |
| O | 1.07966100  | 2.48194900  | -0.62254300 |
| H | 0.60192800  | 3.15408500  | -0.11307900 |
| H | -1.31673000 | 2.06296900  | 0.37208200  |
| N | -2.94639900 | 0.07481300  | 0.29332900  |
| H | -3.25291600 | 0.99515400  | 0.58096700  |
| H | -3.31436100 | -0.64250800 | 0.90550900  |

1-OH-3-OH-substituted

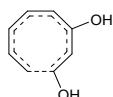

|   |             |             |             |
|---|-------------|-------------|-------------|
| C | 1.46520800  | 0.23711700  | 1.15527100  |
| C | 2.12113600  | -0.69885300 | 0.38165700  |
| C | 1.48063600  | -1.75991700 | -0.27976100 |
| C | 0.11935900  | -2.02909400 | -0.42924600 |
| C | -1.11285500 | -1.37754900 | -0.19694400 |
| C | -1.55369100 | -0.07286000 | 0.03801300  |
| C | -0.87692800 | 1.15237600  | -0.03227200 |
| C | 0.42342600  | 1.30239700  | -0.49305300 |
| H | 0.52136100  | -0.03238600 | 1.61294900  |
| H | 2.02832800  | 1.03198000  | 1.63759300  |
| H | 3.18523700  | -0.56717400 | 0.18942300  |
| H | 2.13640900  | -2.50015100 | -0.73363600 |
| H | -0.05365600 | -3.02837600 | -0.82944000 |
| H | -1.96388300 | -2.05240100 | -0.26668200 |
| H | 0.83700600  | 0.59491500  | -1.19907200 |
| O | 1.01440600  | 2.52107800  | -0.60341000 |
| H | 0.53695800  | 3.17151400  | -0.06629600 |
| H | -1.37131000 | 2.02461500  | 0.40016300  |
| O | -2.89090500 | -0.02402900 | 0.37725700  |
| H | -3.24221400 | 0.85935700  | 0.20223000  |

1-OH-3-F-substituted

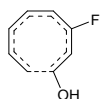

|   |             |             |             |
|---|-------------|-------------|-------------|
| C | -1.46786300 | -0.11652800 | 1.13452600  |
| C | -2.03301700 | 0.87668500  | 0.35907900  |
| C | -1.30576700 | 1.89095500  | -0.28573100 |
| C | 0.07177900  | 2.05834000  | -0.42051800 |
| C | 1.23364300  | 1.29281800  | -0.17413900 |
| C | 1.52024200  | -0.05064700 | 0.02864400  |
| C | 0.78387900  | -1.22971400 | -0.04558100 |
| C | -0.53060400 | -1.30083800 | -0.48952700 |
| H | -0.51145300 | 0.06825100  | 1.60762500  |
| H | -2.10562200 | -0.85918900 | 1.60679600  |
| H | -3.10181100 | 0.83266200  | 0.15403700  |
| H | -1.89926900 | 2.68324600  | -0.73761200 |
| H | 0.33446300  | 3.04452800  | -0.80274600 |

|   |             |             |             |
|---|-------------|-------------|-------------|
| H | 2.15055600  | 1.87829500  | -0.20705400 |
| H | -0.90968100 | -0.58557100 | -1.20569100 |
| O | -1.19547800 | -2.48165100 | -0.56869100 |
| H | -0.74563500 | -3.15382600 | -0.03404500 |
| H | 1.26601900  | -2.12339700 | 0.34777100  |
| F | 2.82805700  | -0.27313500 | 0.35332500  |

1-OH-3-CHO-substituted

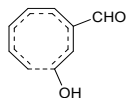

|   |             |             |             |
|---|-------------|-------------|-------------|
| C | -1.70893100 | 0.05395000  | 1.21715000  |
| C | -2.23912500 | 1.06840700  | 0.44970800  |
| C | -1.46249200 | 2.00065100  | -0.25915600 |
| C | -0.08713500 | 2.02725300  | -0.48560800 |
| C | 1.00285800  | 1.14911300  | -0.28741400 |
| C | 1.19353600  | -0.21590700 | -0.05600100 |
| C | 0.29871800  | -1.30341000 | -0.07884300 |
| C | -1.01501900 | -1.26530700 | -0.50469500 |
| H | -0.70411000 | 0.15798700  | 1.60755300  |
| H | -2.36705700 | -0.63801700 | 1.73603300  |
| H | -3.31833600 | 1.11398200  | 0.31323300  |
| H | -2.00605000 | 2.84173300  | -0.68600900 |
| H | 0.24689100  | 2.97977400  | -0.89668200 |
| H | 1.96155500  | 1.66000400  | -0.37505500 |
| H | -1.36269000 | -0.49835900 | -1.18212200 |
| O | -1.80885800 | -2.36330600 | -0.54915400 |
| H | -1.40884500 | -3.08745000 | -0.04286200 |
| H | 0.66938600  | -2.25314300 | 0.31483200  |
| C | 2.60332200  | -0.61742900 | 0.23188400  |
| H | 2.73612600  | -1.69451100 | 0.46843500  |
| O | 3.56370000  | 0.11756500  | 0.22171800  |

1-OH-3-CN-substituted

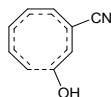

|   |             |             |             |
|---|-------------|-------------|-------------|
| C | 1.59053300  | 0.24517800  | 1.22370300  |
| C | 2.33805300  | -0.65590700 | 0.49241600  |
| C | 1.78444000  | -1.73881700 | -0.20774900 |
| C | 0.44832100  | -2.04783800 | -0.46190300 |
| C | -0.80778300 | -1.41701800 | -0.30671300 |
| C | -1.27521800 | -0.11078600 | -0.09732700 |
| C | -0.62102800 | 1.13578100  | -0.11518800 |
| C | 0.69074900  | 1.33295200  | -0.51332700 |
| H | 0.62938500  | -0.06561000 | 1.61437200  |
| H | 2.08178100  | 1.06670700  | 1.73814700  |
| H | 3.40586700  | -0.47976300 | 0.37450600  |
| H | 2.49568500  | -2.45830900 | -0.60852600 |
| H | 0.32602800  | -3.05264500 | -0.86487400 |
| H | -1.62636500 | -2.12542300 | -0.41832500 |
| H | 1.17563100  | 0.63817300  | -1.18497500 |
| O | 1.25930300  | 2.56091700  | -0.57119400 |

|   |             |             |             |
|---|-------------|-------------|-------------|
| H | 0.71875200  | 3.20681700  | -0.08998400 |
| H | -1.17956500 | 1.99398600  | 0.25778800  |
| C | -2.69593700 | -0.02072400 | 0.16527100  |
| N | -3.83062700 | 0.06454200  | 0.38233200  |

1-OH-3-NO<sub>2</sub>-substituted

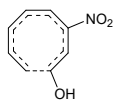

|   |             |             |             |
|---|-------------|-------------|-------------|
| C | 1.89738100  | 0.25839800  | 1.21486700  |
| C | 2.64680400  | -0.67394500 | 0.52371700  |
| C | 2.08962200  | -1.77083200 | -0.14877100 |
| C | 0.75255100  | -2.06898500 | -0.41498400 |
| C | -0.49558200 | -1.41599300 | -0.30173000 |
| C | -0.92833500 | -0.10409700 | -0.13460600 |
| C | -0.27641000 | 1.13309200  | -0.16812100 |
| C | 1.03990700  | 1.29643400  | -0.56395100 |
| H | 0.93257900  | -0.03416600 | 1.61068300  |
| H | 2.38901500  | 1.09386400  | 1.70589700  |
| H | 3.71767000  | -0.51187300 | 0.41455500  |
| H | 2.79630900  | -2.51152100 | -0.51784100 |
| H | 0.62209600  | -3.08317000 | -0.79003000 |
| H | -1.33026800 | -2.10106700 | -0.41287500 |
| H | 1.52214800  | 0.57879300  | -1.21300800 |
| O | 1.62641200  | 2.51440800  | -0.64658900 |
| H | 1.08151300  | 3.18180200  | -0.20062300 |
| H | -0.83107300 | 1.99701400  | 0.18809400  |
| N | -2.40194400 | 0.02047600  | 0.11877800  |
| O | -3.10531200 | -0.96396200 | -0.01284300 |
| O | -2.82635100 | 1.11487400  | 0.45257900  |

1-F-3-CH<sub>3</sub>-substituted

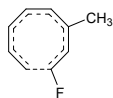

|   |             |             |             |
|---|-------------|-------------|-------------|
| C | 1.49357800  | 0.28736000  | 1.18556800  |
| C | 2.18918400  | -0.61314800 | 0.41462600  |
| C | 1.58624900  | -1.69039800 | -0.26752100 |
| C | 0.24440400  | -1.99408400 | -0.46240400 |
| C | -1.02739600 | -1.39608100 | -0.22017400 |
| C | -1.54957600 | -0.12619600 | 0.01454600  |
| C | -0.88932100 | 1.12082000  | -0.05607300 |
| C | 0.38852000  | 1.30762100  | -0.51042600 |
| H | 0.53950400  | -0.00385300 | 1.60660000  |
| H | 2.00795800  | 1.11315800  | 1.66979500  |
| H | 3.25039800  | -0.44642500 | 0.23636800  |
| H | 2.27447800  | -2.40964500 | -0.70795000 |
| H | 0.11514600  | -2.98870200 | -0.89012300 |
| H | -1.81251400 | -2.14938900 | -0.28565900 |
| H | 0.88637800  | 0.64824200  | -1.20833800 |
| H | -1.39955400 | 1.99936000  | 0.33672700  |
| C | -3.02345400 | -0.03563700 | 0.36847100  |
| H | -3.56729100 | 0.58869000  | -0.34855600 |



|   |             |             |             |
|---|-------------|-------------|-------------|
| H | -3.49535300 | -1.02057600 | 0.39036700  |
| H | -3.15273700 | 0.41760200  | 1.35831600  |
| F | 0.87560600  | 2.56555500  | -0.55080300 |

1-F-3-NH<sub>2</sub>-substituted

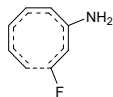

|   |             |             |             |
|---|-------------|-------------|-------------|
| C | 1.51937700  | 0.27777000  | 1.18630300  |
| C | 2.16977000  | -0.64809400 | 0.40573300  |
| C | 1.53300800  | -1.70997200 | -0.26851400 |
| C | 0.17990200  | -1.98613000 | -0.45174300 |
| C | -1.07775500 | -1.37001600 | -0.23196500 |
| C | -1.57447400 | -0.08762300 | 0.03065700  |
| C | -0.89479700 | 1.14952500  | -0.03953400 |
| C | 0.38144000  | 1.28901600  | -0.51148800 |
| H | 0.56127300  | 0.02652800  | 1.62307600  |
| H | 2.07250600  | 1.08359900  | 1.66138900  |
| H | 3.23433500  | -0.51619300 | 0.21577200  |
| H | 2.19873600  | -2.44481600 | -0.71669300 |
| H | 0.03295500  | -2.97811900 | -0.88002800 |
| H | -1.89241700 | -2.08424300 | -0.35361300 |
| H | 0.84810000  | 0.60351200  | -1.20673000 |
| H | -1.36722300 | 2.03591300  | 0.37908200  |
| N | -2.95038100 | -0.01572100 | 0.30956500  |
| H | -3.28493100 | 0.89017000  | 0.61004900  |
| H | -3.31287500 | -0.76084200 | 0.89008800  |
| F | 0.90482000  | 2.52974400  | -0.56733800 |

1-F-3-OH-substituted

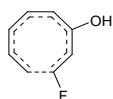

|   |             |             |             |
|---|-------------|-------------|-------------|
| C | 1.50970600  | 0.30347300  | 1.16565200  |
| C | 2.17321300  | -0.59812300 | 0.37024200  |
| C | 1.55678500  | -1.68320300 | -0.28990600 |
| C | 0.21273700  | -2.00377400 | -0.43877200 |
| C | -1.05383100 | -1.41354900 | -0.18500100 |
| C | -1.55772000 | -0.13952200 | 0.04607500  |
| C | -0.93437200 | 1.12422200  | -0.02951700 |
| C | 0.33218500  | 1.31710500  | -0.50929200 |
| H | 0.56378600  | 0.02391200  | 1.61262300  |
| H | 2.04594200  | 1.12392600  | 1.63487200  |
| H | 3.22916500  | -0.43297000 | 0.16022800  |
| H | 2.23751100  | -2.39916300 | -0.74621000 |
| H | 0.08007100  | -3.00285800 | -0.85400000 |
| H | -1.86680400 | -2.13578000 | -0.23433100 |
| H | 0.81842700  | 0.66037900  | -1.21800200 |
| H | -1.43603500 | 1.98316100  | 0.41325500  |
| O | -2.89073600 | -0.14603700 | 0.39225300  |
| H | -3.27525600 | 0.72956700  | 0.24969400  |
| F | 0.81076400  | 2.57537100  | -0.54811500 |

1-F-3-F-substituted

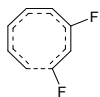

|   |             |             |             |
|---|-------------|-------------|-------------|
| C | -1.50485700 | -0.23542400 | 1.14531200  |
| C | -2.12334000 | 0.69706200  | 0.34843200  |
| C | -1.46160000 | 1.76478500  | -0.29639300 |
| C | -0.10742000 | 2.03733900  | -0.43124900 |
| C | 1.12133500  | 1.37660300  | -0.16177600 |
| C | 1.52861700  | 0.07263100  | 0.03810900  |
| C | 0.89370400  | -1.17520400 | -0.03765200 |
| C | -0.38393400 | -1.33908900 | -0.50340100 |
| H | -0.55457600 | 0.00175000  | 1.60719000  |
| H | -2.08090100 | -1.03393600 | 1.60520800  |
| H | -3.18234300 | 0.57346500  | 0.12650400  |
| H | -2.11266600 | 2.50864000  | -0.75160400 |
| H | 0.07597300  | 3.03421500  | -0.83099100 |
| H | 1.97840900  | 2.04752000  | -0.17459600 |
| H | -0.85703900 | -0.68507500 | -1.22243400 |
| H | 1.41594100  | -2.03261100 | 0.37758200  |
| F | 2.84644100  | -0.04050200 | 0.36652800  |
| F | -0.89731100 | -2.58240900 | -0.51598800 |

1-F-3-CHO-substituted

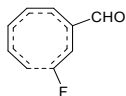

|   |             |             |             |
|---|-------------|-------------|-------------|
| C | -1.76290900 | 0.04223800  | 1.22865200  |
| C | -2.28161200 | 1.03556400  | 0.43843200  |
| C | -1.49853400 | 1.97010200  | -0.27427900 |
| C | -0.12937200 | 2.00939100  | -0.50009700 |
| C | 0.98087200  | 1.15112400  | -0.27964700 |
| C | 1.20212500  | -0.20306200 | -0.05300700 |
| C | 0.32668100  | -1.31638800 | -0.08026100 |
| C | -0.96521200 | -1.29490400 | -0.51563500 |
| H | -0.75068800 | 0.12873000  | 1.60404400  |
| H | -2.41795800 | -0.65769300 | 1.74030300  |
| H | -3.35887700 | 1.07790100  | 0.28716300  |
| H | -2.04717300 | 2.80605600  | -0.70503000 |
| H | 0.19289100  | 2.95884800  | -0.92700900 |
| H | 1.92743100  | 1.68816000  | -0.34580700 |
| H | -1.37924000 | -0.56614300 | -1.19758600 |
| H | 0.68818500  | -2.26172500 | 0.32369700  |
| C | 2.62116700  | -0.57378900 | 0.24110400  |
| H | 2.77821900  | -1.64748400 | 0.47397500  |
| O | 3.56068800  | 0.18703900  | 0.23813300  |
| F | -1.67528100 | -2.43829000 | -0.48782000 |

1-F-3-CN-substituted

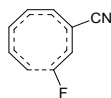

|   |             |             |             |
|---|-------------|-------------|-------------|
| C | 1.64728300  | 0.25788800  | 1.23734300  |
| C | 2.37174900  | -0.62941500 | 0.48071600  |
| C | 1.80339500  | -1.71331700 | -0.22111600 |
| C | 0.47389600  | -2.02378300 | -0.47369600 |
| C | -0.79536100 | -1.40869500 | -0.29521500 |
| C | -1.28234900 | -0.11707400 | -0.09011700 |
| C | -0.64171300 | 1.14698200  | -0.11400700 |
| C | 0.64428000  | 1.34326300  | -0.53003000 |
| H | 0.67362900  | -0.03023800 | 1.61410100  |
| H | 2.13878600  | 1.08629400  | 1.74004500  |
| H | 3.43786500  | -0.45701600 | 0.34425900  |
| H | 2.51324700  | -2.43200400 | -0.62618500 |
| H | 0.35595200  | -3.02239400 | -0.89259800 |
| H | -1.60082800 | -2.13527200 | -0.38552100 |
| H | 1.17907100  | 0.68864600  | -1.20396600 |
| H | -1.18121100 | 2.00725500  | 0.27406500  |
| C | -2.70336200 | -0.04761900 | 0.17618300  |
| N | -3.83867700 | 0.01632100  | 0.39592700  |
| F | 1.13859100  | 2.59234500  | -0.51733900 |

#### 1-F-3-NO<sub>2</sub>-substituted

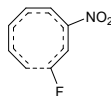

|   |             |             |             |
|---|-------------|-------------|-------------|
| C | 1.95499300  | 0.26859500  | 1.22798400  |
| C | 2.68008300  | -0.65054500 | 0.51013700  |
| C | 2.10643900  | -1.74841500 | -0.16375200 |
| C | 0.77585100  | -2.04570900 | -0.42682000 |
| C | -0.48433900 | -1.40355600 | -0.28810500 |
| C | -0.93446300 | -0.10478100 | -0.13056800 |
| C | -0.29675300 | 1.14995300  | -0.17135900 |
| C | 0.99531400  | 1.31073500  | -0.58149500 |
| H | 0.97619300  | 0.00057800  | 1.60635700  |
| H | 2.44778800  | 1.10974900  | 1.70773600  |
| H | 3.74956100  | -0.49402700 | 0.38174900  |
| H | 2.81051900  | -2.49028400 | -0.53584300 |
| H | 0.64686800  | -3.05432600 | -0.81658000 |
| H | -1.30993600 | -2.10414100 | -0.37207400 |
| H | 1.52625900  | 0.63299200  | -1.23530100 |
| H | -0.83253900 | 2.01793000  | 0.19743200  |
| N | -2.41011400 | 0.00073900  | 0.12587500  |
| O | -2.84461500 | 1.09158300  | 0.45187900  |
| O | -3.09851900 | -0.99556500 | 0.00354200  |
| F | 1.51315700  | 2.55006200  | -0.59045600 |

#### 1-CHO-3-CH<sub>3</sub>-substituted

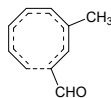

|   |             |             |             |
|---|-------------|-------------|-------------|
| C | 0.64650000  | -1.40280700 | 1.12407300  |
| C | 0.00274400  | -2.36307100 | 0.37894300  |
| C | -1.25614800 | -2.19098300 | -0.22965400 |
| C | -2.05502600 | -1.06461900 | -0.40684900 |
| C | -1.99214800 | 0.34312900  | -0.20651300 |
| C | -1.03075500 | 1.33407700  | 0.00820500  |
| C | 0.36957600  | 1.19875100  | -0.06585300 |
| C | 1.03669600  | 0.09964300  | -0.56211600 |
| H | 0.07748800  | -0.60023800 | 1.57476100  |
| H | 1.61854900  | -1.60668000 | 1.56610100  |
| H | 0.51641600  | -3.30243600 | 0.18077900  |
| H | -1.69445300 | -3.10146800 | -0.63519800 |
| H | -3.04118500 | -1.33948000 | -0.78152000 |
| H | -2.99563600 | 0.76598800  | -0.26384100 |
| H | 0.52283800  | -0.58199200 | -1.22941800 |
| C | 2.51643700  | 0.06776300  | -0.57727800 |
| H | 2.97145300  | -0.74460800 | -1.17806900 |
| O | 3.22217500  | 0.84274400  | 0.03347300  |
| H | 0.98067500  | 2.00321800  | 0.34545700  |
| C | -1.53317800 | 2.72651900  | 0.34447900  |
| H | -1.25255200 | 3.44551500  | -0.43286800 |
| H | -2.61933800 | 2.75341300  | 0.45787800  |
| H | -1.08984100 | 3.07640500  | 1.28353300  |

1-CHO-3-NH<sub>2</sub>-substituted

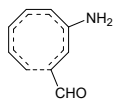

|   |             |             |             |
|---|-------------|-------------|-------------|
| C | 0.64116200  | -1.44028900 | 1.12067900  |
| C | -0.05773000 | -2.35384500 | 0.36650300  |
| C | -1.31451800 | -2.13191900 | -0.23008700 |
| C | -2.08386500 | -0.97951500 | -0.39567000 |
| C | -1.98842700 | 0.42135100  | -0.21978600 |
| C | -0.99718800 | 1.38598100  | 0.02117200  |
| C | 0.40168700  | 1.21989700  | -0.05219500 |
| C | 1.01952100  | 0.10568100  | -0.56719700 |
| H | 0.12607100  | -0.60990100 | 1.58435100  |
| H | 1.60423200  | -1.70608100 | 1.54941000  |
| H | 0.41125700  | -3.31436400 | 0.15631700  |
| H | -1.78421400 | -3.02360700 | -0.64113500 |
| H | -3.07672800 | -1.22953000 | -0.77025400 |
| H | -2.96632900 | 0.89222500  | -0.32773000 |
| H | 0.47443800  | -0.55889400 | -1.22700000 |
| C | 2.49565800  | 0.00574100  | -0.57182000 |
| H | 2.91455800  | -0.84539600 | -1.14372900 |
| O | 3.23264000  | 0.76987000  | 0.01590100  |
| H | 1.03850400  | 1.98906200  | 0.38514400  |
| N | -1.46498600 | 2.68025600  | 0.29099200  |
| H | -0.75662900 | 3.34784700  | 0.56608800  |
| H | -2.28917700 | 2.73938500  | 0.87479900  |

1-CHO-3-OH-substituted

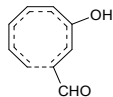

|   |             |             |             |
|---|-------------|-------------|-------------|
| C | 0.58094200  | -1.42848100 | 1.10712600  |
| C | -0.14064100 | -2.32888000 | 0.35568600  |
| C | -1.39152900 | -2.07322300 | -0.23798000 |
| C | -2.12557200 | -0.89881600 | -0.39570600 |
| C | -1.97432800 | 0.49622200  | -0.19957900 |
| C | -0.94005000 | 1.40901600  | 0.02677600  |
| C | 0.44919900  | 1.22175500  | -0.04991700 |
| C | 1.02959300  | 0.07944900  | -0.55305000 |
| H | 0.08075600  | -0.59582200 | 1.58307600  |
| H | 1.53708500  | -1.71757700 | 1.53624800  |
| H | 0.30595700  | -3.29907100 | 0.14238200  |
| H | -1.88719600 | -2.94937300 | -0.65182300 |
| H | -3.12786500 | -1.10916600 | -0.76859000 |
| H | -2.93927600 | 1.00169700  | -0.27980400 |
| H | 0.46485300  | -0.55783600 | -1.22308900 |
| C | 2.50426800  | -0.06313400 | -0.57191800 |
| H | 2.89317100  | -0.91425400 | -1.16507300 |
| O | 3.26532000  | 0.66556300  | 0.02685600  |
| H | 1.08287600  | 1.99656200  | 0.37663200  |
| O | -1.28248300 | 2.69784800  | 0.34814900  |
| H | -2.22433600 | 2.75410500  | 0.56136000  |

#### 1-CHO-3-F-substituted

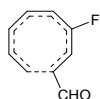

|   |             |             |             |
|---|-------------|-------------|-------------|
| C | 0.41147000  | -1.48273200 | 1.10106800  |
| C | -0.38414100 | -2.29657900 | 0.33151600  |
| C | -1.61067200 | -1.91971400 | -0.25613000 |
| C | -2.23847400 | -0.68612900 | -0.38695600 |
| C | -1.93841600 | 0.68148400  | -0.15732500 |
| C | -0.80153400 | 1.45038500  | 0.02540000  |
| C | 0.56672400  | 1.17443900  | -0.06015900 |
| C | 1.06040700  | -0.00630900 | -0.56636200 |
| H | -0.00388900 | -0.60068500 | 1.57077000  |
| H | 1.33463700  | -1.86395600 | 1.52970200  |
| H | -0.02958700 | -3.30051300 | 0.10325900  |
| H | -2.18447600 | -2.74408000 | -0.67598100 |
| H | -3.26188400 | -0.78993000 | -0.74554200 |
| H | -2.82688800 | 1.31110600  | -0.16140400 |
| H | 0.45330800  | -0.60079100 | -1.23773000 |
| C | 2.51955600  | -0.26134000 | -0.56605800 |
| H | 2.85394800  | -1.12990900 | -1.16601800 |
| O | 3.32133700  | 0.40111800  | 0.05583800  |
| H | 1.25555800  | 1.90184700  | 0.36463000  |
| F | -1.07455000 | 2.74299200  | 0.35351600  |

#### 1-CHO-3-CHO-substituted

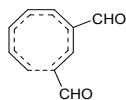

|   |             |             |             |
|---|-------------|-------------|-------------|
| C | -1.47468200 | 0.97031400  | 1.18195300  |
| C | -1.45728600 | 2.10887700  | 0.41880100  |
| C | -0.31440200 | 2.61984200  | -0.23407100 |
| C | 0.94794100  | 2.07811800  | -0.45019400 |
| C | 1.60068000  | 0.83164300  | -0.26746800 |
| C | 1.25187800  | -0.50323500 | -0.06535500 |
| C | -0.00709800 | -1.14006000 | -0.11336600 |
| C | -1.16709400 | -0.57749700 | -0.58631000 |
| H | -0.55020600 | 0.56122000  | 1.56956600  |
| H | -2.39110300 | 0.63474100  | 1.66018100  |
| H | -2.39179900 | 2.64234900  | 0.25492000  |
| H | -0.43020900 | 3.62695500  | -0.63166200 |
| H | 1.64562900  | 2.82148400  | -0.83434700 |
| H | 2.68489300  | 0.93812700  | -0.32389600 |
| H | -1.12627400 | 0.29080200  | -1.23208300 |
| C | -2.43550300 | -1.34042900 | -0.55121600 |
| H | -3.27436500 | -0.90694900 | -1.12984400 |
| O | -2.59150700 | -2.36597800 | 0.07671900  |
| H | -0.08031200 | -2.14791400 | 0.29923000  |
| C | 2.39572700  | -1.42047600 | 0.23379800  |
| H | 2.10133100  | -2.46469600 | 0.46260500  |
| O | 3.56293700  | -1.10385900 | 0.23651900  |

#### 1-CHO-3-CN-substituted

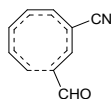

|   |             |             |             |
|---|-------------|-------------|-------------|
| C | -1.55434700 | 0.64466000  | 1.19263300  |
| C | -1.79273000 | 1.77424000  | 0.45130100  |
| C | -0.79366400 | 2.53520800  | -0.19168500 |
| C | 0.55290900  | 2.28285400  | -0.42747700 |
| C | 1.47282400  | 1.21109100  | -0.27866800 |
| C | 1.42311200  | -0.17410500 | -0.09376100 |
| C | 0.32890800  | -1.06979800 | -0.13151800 |
| C | -0.92043400 | -0.73504600 | -0.59207600 |
| H | -0.56395300 | 0.45011400  | 1.58473800  |
| H | -2.37229600 | 0.10659500  | 1.66427300  |
| H | -2.82257500 | 2.09108700  | 0.29694100  |
| H | -1.12746900 | 3.50072700  | -0.56787100 |
| H | 1.06722100  | 3.16590700  | -0.80453700 |
| H | 2.49819400  | 1.56974700  | -0.35543600 |
| H | -1.04563900 | 0.12726800  | -1.23594000 |
| C | -2.01564700 | -1.73509300 | -0.57088000 |
| H | -2.91552600 | -1.47497200 | -1.16095600 |
| O | -1.97117700 | -2.76906400 | 0.05832000  |
| H | 0.47325200  | -2.06978500 | 0.27431900  |
| C | 2.70715900  | -0.78926400 | 0.17007400  |
| N | 3.73280900  | -1.28323700 | 0.38146500  |

#### 1-CHO-3-NO<sub>2</sub>-substituted

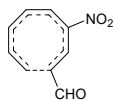

|   |             |             |             |
|---|-------------|-------------|-------------|
| C | -1.91615200 | 0.48484600  | 1.19670200  |
| C | -2.29297400 | 1.59758200  | 0.48790400  |
| C | -1.39612500 | 2.48776800  | -0.13924800 |
| C | -0.03207100 | 2.40128600  | -0.39152800 |
| C | 1.00475400  | 1.43774300  | -0.27941800 |
| C | 1.09722300  | 0.06282000  | -0.13058100 |
| C | 0.13905600  | -0.96411200 | -0.17484600 |
| C | -1.14308800 | -0.76527700 | -0.62465700 |
| H | -0.90832500 | 0.39987300  | 1.58309800  |
| H | -2.66097100 | -0.16126700 | 1.65384500  |
| H | -3.35421300 | 1.79310000  | 0.34627200  |
| H | -1.84329900 | 3.41737800  | -0.48747800 |
| H | 0.37318300  | 3.34658000  | -0.74884600 |
| H | 1.98732900  | 1.89459600  | -0.35963000 |
| H | -1.37748700 | 0.08898400  | -1.24804100 |
| C | -2.11114300 | -1.88997000 | -0.62159200 |
| H | -3.03887100 | -1.72597100 | -1.20343600 |
| O | -1.93985000 | -2.92449100 | -0.01663300 |
| H | 0.41073900  | -1.94192300 | 0.21305600  |
| N | 2.49521600  | -0.42496400 | 0.12415200  |
| O | 3.42420600  | 0.33930100  | -0.06474900 |
| O | 2.62171000  | -1.57140000 | 0.51209300  |

1-CN-3-CH<sub>3</sub>-substituted

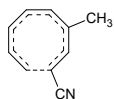

|   |             |             |             |
|---|-------------|-------------|-------------|
| C | -0.93107100 | 1.08878900  | 1.22155900  |
| C | -0.69197700 | 2.17957000  | 0.41712700  |
| C | 0.50041200  | 2.37651900  | -0.30410400 |
| C | 1.58493200  | 1.53239700  | -0.52887900 |
| C | 1.95682900  | 0.17986900  | -0.28956400 |
| C | 1.35041700  | -1.04136500 | 0.01437700  |
| C | -0.02618600 | -1.33909200 | 0.03113600  |
| C | -1.01964400 | -0.48618900 | -0.41166400 |
| H | -0.09362900 | 0.53359800  | 1.62542300  |
| H | -1.87906900 | 0.98612600  | 1.74261200  |
| H | -1.49065200 | 2.90139300  | 0.25731500  |
| H | 0.60543300  | 3.35638900  | -0.76655300 |
| H | 2.41267300  | 2.06711400  | -0.99470000 |
| H | 3.03438400  | 0.06853800  | -0.41313200 |
| H | -0.77513000 | 0.29399900  | -1.12170500 |
| C | -2.39328700 | -0.90828200 | -0.39926200 |
| N | -3.50664700 | -1.22884300 | -0.37351200 |
| H | -0.32801400 | -2.28649900 | 0.47613800  |
| C | 2.26502100  | -2.20968400 | 0.33756800  |
| H | 3.31349500  | -1.90620400 | 0.37565400  |
| H | 2.00709200  | -2.64122300 | 1.31126700  |
| H | 2.16727600  | -3.00651800 | -0.40749700 |

1-CN-3-NH<sub>2</sub>-substituted

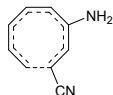

|   |             |             |             |
|---|-------------|-------------|-------------|
| C | -0.89671900 | 1.14654700  | 1.22812300  |
| C | -0.57831600 | 2.20325000  | 0.40784900  |
| C | 0.62847000  | 2.32701700  | -0.30743900 |
| C | 1.67074900  | 1.42541600  | -0.52203900 |
| C | 1.97378600  | 0.05950600  | -0.30487500 |
| C | 1.30388500  | -1.12733600 | 0.02644800  |
| C | -0.08798800 | -1.36121400 | 0.04573500  |
| C | -1.02235300 | -0.45960300 | -0.41713300 |
| H | -0.10709600 | 0.53009200  | 1.63812300  |
| H | -1.85310700 | 1.11730700  | 1.74292500  |
| H | -1.32928900 | 2.97233400  | 0.23474300  |
| H | 0.78769400  | 3.29531600  | -0.77776600 |
| H | 2.52276700  | 1.91719400  | -0.99137900 |
| H | 3.03239500  | -0.13532500 | -0.47983200 |
| H | -0.72855700 | 0.30895100  | -1.12163200 |
| C | -2.41749800 | -0.80019700 | -0.40430000 |
| N | -3.54585300 | -1.06333900 | -0.38224200 |
| H | -0.44229200 | -2.27736400 | 0.51490300  |
| N | 2.12653600  | -2.23613700 | 0.28156500  |
| H | 1.64866200  | -3.06600900 | 0.60728600  |
| H | 2.95993500  | -2.04647500 | 0.82314800  |

1-CN-3-OH-substituted

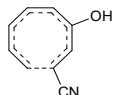

|   |             |             |             |
|---|-------------|-------------|-------------|
| C | 0.79924700  | -1.21530900 | 1.21038100  |
| C | 0.40554900  | -2.23261400 | 0.37529300  |
| C | -0.81615300 | -2.26517700 | -0.32798200 |
| C | -1.79891200 | -1.29614600 | -0.50828100 |
| C | -1.99362700 | 0.08527000  | -0.25573200 |
| C | -1.21771700 | 1.20382400  | 0.03990200  |
| C | 0.18162400  | 1.35976700  | 0.05112000  |
| C | 1.05607200  | 0.40261300  | -0.41768400 |
| H | 0.05768800  | -0.54789100 | 1.63135600  |
| H | 1.75858700  | -1.26042300 | 1.71842600  |
| H | 1.10138800  | -3.04759800 | 0.18326700  |
| H | -1.04633700 | -3.21509400 | -0.80658800 |
| H | -2.69630600 | -1.71803300 | -0.96007000 |
| H | -3.03864100 | 0.37575500  | -0.35297600 |
| H | 0.71170100  | -0.33769000 | -1.12881600 |
| C | 2.47049700  | 0.64687400  | -0.39770000 |
| N | 3.61434200  | 0.82992500  | -0.36932500 |
| H | 0.58844100  | 2.24810900  | 0.53238400  |
| O | -1.97610100 | 2.30584100  | 0.35874500  |
| H | -1.44759300 | 3.11205800  | 0.28243700  |

1-CN-3-F-substituted



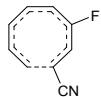

|   |             |             |             |
|---|-------------|-------------|-------------|
| C | -0.71327500 | 1.24113700  | 1.18983800  |
| C | -0.25145100 | 2.23530800  | 0.35977400  |
| C | 0.97860000  | 2.20007500  | -0.32789100 |
| C | 1.90624200  | 1.17811500  | -0.49905300 |
| C | 1.99730300  | -0.21213900 | -0.23434300 |
| C | 1.12209300  | -1.25095600 | 0.03356700  |
| C | -0.27253300 | -1.36099900 | 0.03966800  |
| C | -1.09742500 | -0.35199800 | -0.41565500 |
| H | -0.01477500 | 0.53772300  | 1.62585200  |
| H | -1.67264300 | 1.34538500  | 1.68890800  |
| H | -0.89746900 | 3.08801700  | 0.15873700  |
| H | 1.26811700  | 3.13652700  | -0.80104000 |
| H | 2.83596200  | 1.54050500  | -0.93576200 |
| H | 3.01803300  | -0.58610000 | -0.29974300 |
| H | -0.72022500 | 0.36410700  | -1.13428500 |
| C | -2.52356600 | -0.51646900 | -0.38748000 |
| N | -3.67627200 | -0.62557100 | -0.34935700 |
| H | -0.69279300 | -2.25302900 | 0.49582500  |
| F | 1.74819600  | -2.41850900 | 0.34405100  |

#### 1-CN-3-CHO-substituted

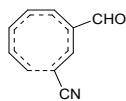

|   |             |             |             |
|---|-------------|-------------|-------------|
| C | -1.43537900 | 0.86580200  | 1.24851900  |
| C | -1.53401300 | 1.96807500  | 0.43550600  |
| C | -0.46054200 | 2.50727400  | -0.30104300 |
| C | 0.81996300  | 2.01906500  | -0.54665900 |
| C | 1.53793600  | 0.81747900  | -0.32832000 |
| C | 1.26492300  | -0.52149400 | -0.04294100 |
| C | 0.04424000  | -1.22686400 | -0.01012200 |
| C | -1.16483300 | -0.72521800 | -0.43854600 |
| H | -0.46602800 | 0.55209000  | 1.61616000  |
| H | -2.30479100 | 0.49390100  | 1.78368500  |
| H | -2.50906400 | 2.43017700  | 0.29524600  |
| H | -0.65209400 | 3.48098800  | -0.74895500 |
| H | 1.46259700  | 2.77334100  | -0.99942900 |
| H | 2.61249900  | 0.96832900  | -0.43930500 |
| H | -1.19022600 | 0.10931200  | -1.12683400 |
| C | -2.35245500 | -1.52958900 | -0.38111600 |
| N | -3.32248100 | -2.16004900 | -0.31667200 |
| H | 0.05759100  | -2.22271900 | 0.43279100  |
| C | 2.46545900  | -1.36565600 | 0.24938200  |
| H | 2.23666600  | -2.41366600 | 0.53127800  |
| O | 3.61230200  | -0.98808100 | 0.19551500  |

#### 1-CN-3-CN-substituted

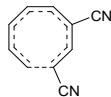

|   |             |             |             |
|---|-------------|-------------|-------------|
| C | -1.44585300 | 0.65074400  | 1.26537000  |
| C | -1.72460700 | 1.74104500  | 0.47649600  |
| C | -0.75633500 | 2.45524600  | -0.25510800 |
| C | 0.57839400  | 2.17185300  | -0.52952200 |
| C | 1.48511200  | 1.09561500  | -0.35341000 |
| C | 1.42194800  | -0.27698700 | -0.08589500 |
| C | 0.32116600  | -1.16181700 | -0.03684100 |
| C | -0.94805100 | -0.81728100 | -0.44666800 |
| H | -0.43856800 | 0.49465000  | 1.63221300  |
| H | -2.24148800 | 0.13595800  | 1.79664800  |
| H | -2.76157700 | 2.04574800  | 0.35059200  |
| H | -1.10033800 | 3.39693700  | -0.67903500 |
| H | 1.08856000  | 3.02244700  | -0.97928700 |
| H | 2.51256000  | 1.42801000  | -0.49319900 |
| H | -1.08628600 | 0.00752100  | -1.13412400 |
| C | -2.01664000 | -1.77488500 | -0.39312200 |
| N | -2.89586300 | -2.52646000 | -0.33236500 |
| H | 0.48619200  | -2.14385800 | 0.39924900  |
| C | 2.70437900  | -0.89950000 | 0.16577000  |
| N | 3.72784400  | -1.40091400 | 0.37015500  |

#### 1-CN-3-NO<sub>2</sub>-substituted

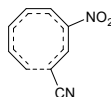

|   |             |             |             |
|---|-------------|-------------|-------------|
| C | -1.80960200 | 0.51712300  | 1.26874500  |
| C | -2.21723000 | 1.59652200  | 0.52049600  |
| C | -1.33994900 | 2.43646200  | -0.19025000 |
| C | 0.01596300  | 2.30959000  | -0.47965100 |
| C | 1.03273200  | 1.33109400  | -0.34499800 |
| C | 1.10278600  | -0.03746900 | -0.12434300 |
| C | 0.12863100  | -1.04752500 | -0.09123000 |
| C | -1.17198700 | -0.82545700 | -0.48803000 |
| H | -0.78939200 | 0.46760300  | 1.62970500  |
| H | -2.53693200 | -0.10306000 | 1.78532900  |
| H | -3.28271700 | 1.78705200  | 0.41034700  |
| H | -1.78668600 | 3.34869500  | -0.58152000 |
| H | 0.42883500  | 3.22526600  | -0.89959100 |
| H | 2.02230100  | 1.75881400  | -0.47956100 |
| H | -1.40365600 | -0.00109200 | -1.15016100 |
| C | -2.13315700 | -1.89244800 | -0.45876500 |
| N | -2.93045200 | -2.73155600 | -0.41706300 |
| H | 0.41250600  | -2.01097000 | 0.31817100  |
| N | 2.49523400  | -0.54384800 | 0.11683600  |
| O | 3.43295700  | 0.19486500  | -0.11835000 |
| O | 2.60868600  | -1.67884400 | 0.54297900  |

#### 1-NO<sub>2</sub>-3-CH<sub>3</sub>-substituted

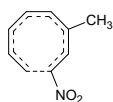

|   |             |             |             |
|---|-------------|-------------|-------------|
| C | -1.80960200 | 0.51712300  | 1.26874500  |
| C | -2.21723000 | 1.59652200  | 0.52049600  |
| C | -1.33994900 | 2.43646200  | -0.19025000 |
| C | 0.01596300  | 2.30959000  | -0.47965100 |
| C | 1.03273200  | 1.33109400  | -0.34499800 |
| C | 1.10278600  | -0.03746900 | -0.12434300 |
| C | 0.12863100  | -1.04752500 | -0.09123000 |
| C | -1.17198700 | -0.82545700 | -0.48803000 |
| H | -0.78939200 | 0.46760300  | 1.62970500  |
| H | -2.53693200 | -0.10306000 | 1.78532900  |
| H | -3.28271700 | 1.78705200  | 0.41034700  |
| H | -1.78668600 | 3.34869500  | -0.58152000 |
| H | 0.42883500  | 3.22526600  | -0.89959100 |
| H | 2.02230100  | 1.75881400  | -0.47956100 |
| H | -1.40365600 | -0.00109200 | -1.15016100 |
| C | -2.13315700 | -1.89244800 | -0.45876500 |
| N | -2.93045200 | -2.73155600 | -0.41706300 |
| H | 0.41250600  | -2.01097000 | 0.31817100  |
| N | 2.49523400  | -0.54384800 | 0.11683600  |
| O | 3.43295700  | 0.19486500  | -0.11835000 |
| O | 2.60868600  | -1.67884400 | 0.54297900  |

#### 1-NO<sub>2</sub>-3-NH<sub>2</sub>-substituted

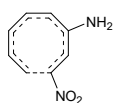

|   |             |             |             |
|---|-------------|-------------|-------------|
| C | 0.44790800  | -1.25510200 | 1.32615600  |
| C | 0.01663500  | -2.28586500 | 0.52840200  |
| C | -1.19225100 | -2.29081400 | -0.19921500 |
| C | -2.11534500 | -1.28526800 | -0.47184500 |
| C | -2.26202300 | 0.11867800  | -0.32102200 |
| C | -1.45915400 | 1.22768900  | -0.03182000 |
| C | -0.04779200 | 1.28039000  | 0.03330700  |
| C | 0.75851000  | 0.25558300  | -0.37247100 |
| H | -0.26249100 | -0.53702600 | 1.71625200  |
| H | 1.40263700  | -1.32027100 | 1.84238600  |
| H | 0.67766100  | -3.13758500 | 0.37744500  |
| H | -1.45906300 | -3.25155800 | -0.63540000 |
| H | -3.01120800 | -1.69398300 | -0.93910700 |
| H | -3.29488600 | 0.41449300  | -0.50961000 |
| H | 0.48095000  | -0.49424900 | -1.09790400 |
| N | 2.20480800  | 0.42456200  | -0.29051400 |
| O | 2.87651300  | -0.32025800 | -0.98669200 |
| O | 2.65480200  | 1.26645300  | 0.47054200  |
| H | 0.41699000  | 2.13835500  | 0.51339700  |
| N | -2.10515000 | 2.43430200  | 0.27314700  |
| H | -1.67030800 | 3.26909200  | -0.09953300 |
| H | -3.10734200 | 2.43937900  | 0.13389200  |

#### 1-NO<sub>2</sub>-3-OH-substituted

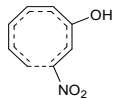

|   |             |             |             |
|---|-------------|-------------|-------------|
| C | 0.34882100  | -1.30172000 | 1.33000700  |
| C | -0.13114300 | -2.28554100 | 0.50855500  |
| C | -1.34128700 | -2.21429400 | -0.22289200 |
| C | -2.20966600 | -1.16157800 | -0.47392400 |
| C | -2.26962800 | 0.24661700  | -0.28402400 |
| C | -1.38861900 | 1.28872700  | -0.02821200 |
| C | 0.02239300  | 1.28989700  | 0.02276600  |
| C | 0.78274400  | 0.23490500  | -0.38776000 |
| H | -0.31401100 | -0.53206600 | 1.70627300  |
| H | 1.29456800  | -1.42851600 | 1.85083700  |
| H | 0.47976500  | -3.17188000 | 0.34673500  |
| H | -1.66056300 | -3.15559000 | -0.66630300 |
| H | -3.13264300 | -1.50787100 | -0.93818000 |
| H | -3.27873200 | 0.63525000  | -0.41242400 |
| H | 0.46974100  | -0.51163100 | -1.10110300 |
| N | 2.23219400  | 0.32844100  | -0.28514600 |
| O | 2.87386700  | -0.46453900 | -0.95526300 |
| O | 2.71321300  | 1.16199600  | 0.46695200  |
| H | 0.53151100  | 2.12840500  | 0.49482200  |
| O | -2.02374100 | 2.48288400  | 0.21319200  |
| H | -1.40339200 | 3.22000500  | 0.12921600  |

#### 1-NO<sub>2</sub>-3-F-substituted

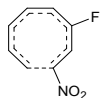

|   |             |             |             |
|---|-------------|-------------|-------------|
| C | -0.28527500 | 1.29112000  | 1.31087300  |
| C | 0.23358100  | 2.26274200  | 0.49685100  |
| C | 1.44771800  | 2.15506600  | -0.22265100 |
| C | 2.28271800  | 1.07579700  | -0.46750500 |
| C | 2.27148600  | -0.33278700 | -0.26618700 |
| C | 1.32344400  | -1.30895200 | -0.03629900 |
| C | -0.07924100 | -1.30007000 | 0.00535500  |
| C | -0.80919100 | -0.21460000 | -0.38590700 |
| H | 0.35096200  | 0.50349400  | 1.69599700  |
| H | -1.22890300 | 1.44943400  | 1.82690700  |
| H | -0.34747500 | 3.16802800  | 0.33168800  |
| H | 1.80181800  | 3.08707100  | -0.65924700 |
| H | 3.22504600  | 1.38238200  | -0.91956700 |
| H | 3.26021600  | -0.77852600 | -0.36469400 |
| H | -0.47981800 | 0.52182100  | -1.10188700 |
| N | -2.26178500 | -0.26428300 | -0.27658600 |
| O | -2.87950300 | 0.55768400  | -0.93424200 |
| O | -2.76232600 | -1.08765700 | 0.47148300  |
| H | -0.58232600 | -2.15661600 | 0.44579400  |
| F | 1.85068400  | -2.53969200 | 0.19733500  |

#### 1-NO<sub>2</sub>-3-CHO-substituted

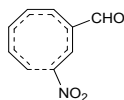

|   |             |             |             |
|---|-------------|-------------|-------------|
| C | -0.98101700 | 1.18640000  | 1.35168200  |
| C | -0.92723900 | 2.29126400  | 0.54566600  |
| C | 0.20498000  | 2.67310400  | -0.21059800 |
| C | 1.38605200  | 2.00321000  | -0.50229100 |
| C | 1.92186700  | 0.69938800  | -0.32609000 |
| C | 1.45545300  | -0.58799900 | -0.07302200 |
| C | 0.13733800  | -1.09443400 | -0.01402200 |
| C | -0.96917400 | -0.39722400 | -0.39809400 |
| H | -0.06717300 | 0.70980500  | 1.68637700  |
| H | -1.88905800 | 0.93772800  | 1.89504600  |
| H | -1.82464100 | 2.89412900  | 0.42309500  |
| H | 0.15290500  | 3.67439400  | -0.63513900 |
| H | 2.12287400  | 2.66031300  | -0.96277200 |
| H | 3.00511700  | 0.69188100  | -0.45481200 |
| H | -0.97168500 | 0.42877600  | -1.09111600 |
| N | -2.28325000 | -1.01448200 | -0.27678100 |
| O | -3.18722500 | -0.48084300 | -0.89997500 |
| O | -2.40895400 | -1.98808100 | 0.44869400  |
| H | -0.01859800 | -2.08258900 | 0.41726400  |
| C | 2.51619900  | -1.61858200 | 0.16010600  |
| H | 2.13218200  | -2.62562400 | 0.42081600  |
| O | 3.70543700  | -1.42085200 | 0.08111700  |

#### 1-NO<sub>2</sub>-3-CN-substituted

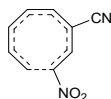

|   |             |             |             |
|---|-------------|-------------|-------------|
| C | -0.97111200 | 1.08945600  | 1.36802800  |
| C | -1.02525800 | 2.21049300  | 0.58313700  |
| C | 0.06112100  | 2.70301300  | -0.17442100 |
| C | 1.28892800  | 2.14011900  | -0.49501200 |
| C | 1.94781100  | 0.88716900  | -0.35596500 |
| C | 1.59411700  | -0.44213100 | -0.11765500 |
| C | 0.32157200  | -1.05978300 | -0.04011400 |
| C | -0.83055700 | -0.42850700 | -0.40327400 |
| H | -0.01535700 | 0.69833900  | 1.69617400  |
| H | -1.84822400 | 0.75063900  | 1.91383800  |
| H | -1.97441500 | 2.73141000  | 0.47736700  |
| H | -0.07927900 | 3.70287200  | -0.58113000 |
| H | 1.95915900  | 2.86415800  | -0.95601800 |
| H | 3.02007900  | 0.99477200  | -0.51241600 |
| H | -0.89068600 | 0.39710800  | -1.09479000 |
| N | -2.10011400 | -1.13667300 | -0.28055000 |
| O | -3.03874500 | -0.66326200 | -0.89971200 |
| O | -2.15334000 | -2.11812600 | 0.44109400  |
| H | 0.25058300  | -2.05762000 | 0.38536400  |
| C | 2.71194000  | -1.34040000 | 0.07677300  |
| N | 3.60346500  | -2.06149300 | 0.23648900  |

#### 1-NO<sub>2</sub>-3-NO<sub>2</sub>-substituted

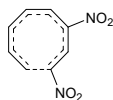

|   |             |             |             |
|---|-------------|-------------|-------------|
| C | -1.41898200 | 0.99508300  | 1.37119000  |
| C | -1.64799100 | 2.11079100  | 0.60984200  |
| C | -0.65144000 | 2.78088800  | -0.13390600 |
| C | 0.64825900  | 2.42028000  | -0.46282300 |
| C | 1.48846000  | 1.27961300  | -0.34541000 |
| C | 1.32696600  | -0.07880200 | -0.13402000 |
| C | 0.18697600  | -0.90155000 | -0.06420800 |
| C | -1.04652800 | -0.44551300 | -0.42166000 |
| H | -0.41408700 | 0.75550000  | 1.69816800  |
| H | -2.23184700 | 0.50856000  | 1.90448600  |
| H | -2.66637700 | 2.48013800  | 0.51132300  |
| H | -0.94515100 | 3.75535100  | -0.52013800 |
| H | 1.19875000  | 3.24591500  | -0.91066600 |
| H | 2.53422400  | 1.53337300  | -0.49753000 |
| H | -1.23428600 | 0.36691400  | -1.10605300 |
| N | -2.19440300 | -1.34023000 | -0.30921300 |
| O | -3.18623900 | -1.01611500 | -0.94209700 |
| O | -2.10660800 | -2.31525500 | 0.41634200  |
| H | 0.28304500  | -1.89973400 | 0.35079100  |
| N | 2.61416300  | -0.82809700 | 0.05375900  |
| O | 2.53269300  | -2.01089900 | 0.32830000  |
| O | 3.66304000  | -0.22428900 | -0.07207300 |

#### 5.3.4 1,4-substituted

##### 1-CH<sub>3</sub>-4-CH<sub>3</sub>-substituted

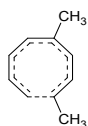

|   |             |             |             |
|---|-------------|-------------|-------------|
| C | -1.25212300 | 1.00438200  | 1.10973900  |
| C | -0.79994900 | 1.97626700  | 0.24774700  |
| C | 0.46558800  | 1.95743900  | -0.37428500 |
| C | 1.45158200  | 0.98055300  | -0.43108400 |
| C | 1.63947800  | -0.37991000 | -0.02755500 |
| C | 0.75947500  | -1.41275900 | 0.28784300  |
| C | -0.64207600 | -1.53505000 | 0.19026200  |
| C | -1.49703700 | -0.64770900 | -0.42680700 |
| H | -0.53571900 | 0.39425200  | 1.64361300  |
| H | -2.24275800 | 1.08285500  | 1.55138900  |
| H | -1.48188100 | 2.76934200  | -0.05576800 |
| H | 0.72672000  | 2.87049200  | -0.90760900 |
| H | 2.36982800  | 1.37721200  | -0.86922200 |
| H | 1.24701200  | -2.30600800 | 0.67574900  |
| H | -1.06554200 | 0.02623100  | -1.15869600 |
| C | -2.97220000 | -0.91115500 | -0.55336400 |
| H | -3.34047700 | -1.51343000 | 0.28328300  |
| H | -3.54320700 | 0.02180600  | -0.58604800 |
| H | -3.18527200 | -1.45523600 | -1.48219700 |
| H | -1.08518500 | -2.38236100 | 0.71639500  |
| C | 3.11807200  | -0.75578300 | 0.00606100  |
| H | 3.26932400  | -1.78573400 | 0.33734100  |

|   |            |             |             |
|---|------------|-------------|-------------|
| H | 3.55924600 | -0.66047000 | -0.99349600 |
| H | 3.68304700 | -0.09660400 | 0.67393000  |

1-CH<sub>3</sub>-4-NH<sub>2</sub>-substituted

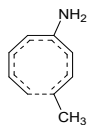

|   |             |             |             |
|---|-------------|-------------|-------------|
| C | -1.19968000 | 1.01851300  | 1.11780000  |
| C | -0.72671800 | 1.99759500  | 0.27500800  |
| C | 0.52585500  | 1.94601200  | -0.37248200 |
| C | 1.47985500  | 0.94521000  | -0.47356200 |
| C | 1.64394600  | -0.41245900 | -0.03956300 |
| C | 0.74577100  | -1.42554700 | 0.30129000  |
| C | -0.65262500 | -1.52625300 | 0.17411600  |
| C | -1.49776900 | -0.62247500 | -0.43290600 |
| H | -0.49656400 | 0.37695200  | 1.63300700  |
| H | -2.18365600 | 1.11719100  | 1.57049300  |
| H | -1.38697100 | 2.81575400  | -0.00735900 |
| H | 0.79505400  | 2.84955700  | -0.91777700 |
| H | 2.38489100  | 1.28350300  | -0.97890000 |
| H | 1.21855300  | -2.31051300 | 0.72670700  |
| H | -1.06305200 | 0.05316800  | -1.16151100 |
| C | -2.97809000 | -0.86180500 | -0.54815500 |
| H | -3.34515700 | -1.48024700 | 0.27744400  |
| H | -3.53560800 | 0.08033300  | -0.54628800 |
| H | -3.21544900 | -1.37649600 | -1.48794700 |
| H | -1.11026200 | -2.36516200 | 0.70152000  |
| N | 3.00973500  | -0.79094000 | -0.06539400 |
| H | 3.19021300  | -1.73140600 | 0.26266100  |
| H | 3.63660000  | -0.12880300 | 0.37642600  |

1-CH<sub>3</sub>-4-OH-substituted

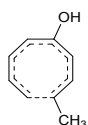

|   |             |             |             |
|---|-------------|-------------|-------------|
| C | -1.18134200 | 1.04838900  | 1.10275800  |
| C | -0.69994300 | 2.00595700  | 0.24325300  |
| C | 0.57080100  | 1.95030500  | -0.36918500 |
| C | 1.52281500  | 0.94656800  | -0.43116800 |
| C | 1.63635400  | -0.41915100 | -0.02947200 |
| C | 0.74445200  | -1.43415800 | 0.29872900  |
| C | -0.65833800 | -1.52209700 | 0.19080700  |
| C | -1.49192600 | -0.62436400 | -0.43582200 |
| H | -0.48496200 | 0.41024600  | 1.63149000  |
| H | -2.17028100 | 1.15318100  | 1.54235300  |
| H | -1.35491300 | 2.82010800  | -0.06207300 |
| H | 0.86541600  | 2.85526000  | -0.89829500 |
| H | 2.46794700  | 1.27286800  | -0.86178900 |
| H | 1.22048900  | -2.32287100 | 0.71498300  |
| H | -1.04849400 | 0.03974700  | -1.17002400 |
| C | -2.97495300 | -0.84589500 | -0.54774200 |

|   |             |             |             |
|---|-------------|-------------|-------------|
| H | -3.34970300 | -1.44948400 | 0.28518700  |
| H | -3.52019600 | 0.10316200  | -0.55782500 |
| H | -3.21793400 | -1.36867300 | -1.48146700 |
| H | -1.12047700 | -2.34873700 | 0.73273100  |
| O | 2.97906000  | -0.75957900 | -0.00296700 |
| H | 3.07310800  | -1.72149100 | 0.01551400  |

1-CH<sub>3</sub>-4-F-substituted

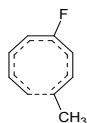

|   |             |             |             |
|---|-------------|-------------|-------------|
| C | -1.12720400 | 1.08750400  | 1.09969400  |
| C | -0.62919700 | 2.02048400  | 0.22506700  |
| C | 0.64669400  | 1.93907800  | -0.37660200 |
| C | 1.56766800  | 0.90661500  | -0.41348600 |
| C | 1.59241300  | -0.46082000 | -0.03050600 |
| C | 0.71069200  | -1.47839100 | 0.27202800  |
| C | -0.69680600 | -1.52648600 | 0.19425000  |
| C | -1.50273800 | -0.60420500 | -0.43101700 |
| H | -0.44560800 | 0.43233400  | 1.62706700  |
| H | -2.11255000 | 1.21625000  | 1.54013000  |
| H | -1.26688300 | 2.84546800  | -0.08770200 |
| H | 0.97346800  | 2.83625200  | -0.89922000 |
| H | 2.53851800  | 1.19142000  | -0.81553400 |
| H | 1.20947300  | -2.37584500 | 0.63030600  |
| H | -1.04105600 | 0.04431300  | -1.16819400 |
| C | -2.99316400 | -0.77064400 | -0.53068100 |
| H | -3.38505100 | -1.35100100 | 0.31051500  |
| H | -3.50254700 | 0.19772900  | -0.55039300 |
| H | -3.25790600 | -1.29505900 | -1.45738800 |
| H | -1.17672900 | -2.34275900 | 0.73516000  |
| F | 2.89519200  | -0.89754500 | 0.00919600  |

1-CH<sub>3</sub>-4-CHO-substituted

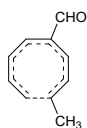

|   |             |             |             |
|---|-------------|-------------|-------------|
| C | -1.67558800 | 0.81706100  | 1.18129300  |
| C | -1.47546100 | 1.85013400  | 0.30364200  |
| C | -0.25256700 | 2.12659000  | -0.35514000 |
| C | 0.90745000  | 1.38104500  | -0.46758700 |
| C | 1.36161900  | 0.06893300  | -0.11740600 |
| C | 0.75614700  | -1.14518400 | 0.19676900  |
| C | -0.58535800 | -1.56451200 | 0.14680700  |
| C | -1.61914900 | -0.86790600 | -0.43945900 |
| H | -0.83022100 | 0.34329400  | 1.66149100  |
| H | -2.64489100 | 0.67574200  | 1.65248200  |
| H | -2.32373400 | 2.47820000  | 0.03467600  |
| H | -0.20916000 | 3.09155400  | -0.85735400 |
| H | 1.71410900  | 1.96309800  | -0.91773600 |
| H | 1.47016500  | -1.89700100 | 0.53070400  |
| H | -1.35696600 | -0.08784500 | -1.14606400 |
| C | -3.01185800 | -1.41890200 | -0.53809800 |



|   |             |             |             |
|---|-------------|-------------|-------------|
| H | -3.22276100 | -2.11832600 | 0.27635900  |
| H | -3.75953500 | -0.62044000 | -0.51805200 |
| H | -3.13582100 | -1.95540500 | -1.48741800 |
| H | -0.82127900 | -2.50092100 | 0.65331800  |
| C | 2.86151100  | -0.01193900 | -0.12608100 |
| H | 3.37399500  | 0.89888100  | -0.49901000 |
| O | 3.51820300  | -0.96034500 | 0.23851900  |

1-CH<sub>3</sub>-4-CN-substituted

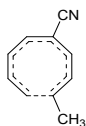

|   |             |             |             |
|---|-------------|-------------|-------------|
| C | -1.56609800 | 0.92561600  | 1.13174400  |
| C | -1.23307500 | 1.91434900  | 0.24153400  |
| C | 0.03297200  | 2.04616400  | -0.37568000 |
| C | 1.11572300  | 1.18716600  | -0.43313500 |
| C | 1.40235300  | -0.16480800 | -0.03990900 |
| C | 0.66364000  | -1.30532200 | 0.28300100  |
| C | -0.71595900 | -1.56777100 | 0.20315300  |
| C | -1.64525300 | -0.77360400 | -0.43246100 |
| H | -0.78655900 | 0.39460600  | 1.66153900  |
| H | -2.55963500 | 0.89183700  | 1.57150100  |
| H | -2.00314600 | 2.61663200  | -0.07423300 |
| H | 0.19483100  | 2.98679800  | -0.89864600 |
| H | 1.99744100  | 1.66025200  | -0.86223300 |
| H | 1.26654200  | -2.13046500 | 0.65608500  |
| H | -1.27303300 | -0.06038200 | -1.15996500 |
| C | -3.08926000 | -1.16507600 | -0.55813400 |
| H | -3.40712000 | -1.78984600 | 0.28181300  |
| H | -3.73849800 | -0.28605500 | -0.60630300 |
| H | -3.24367700 | -1.73429300 | -1.48340200 |
| H | -1.07035700 | -2.45187600 | 0.73336500  |
| C | 2.83353200  | -0.41084600 | -0.00905400 |
| N | 3.97596600  | -0.60177300 | 0.01630300  |

1-CH<sub>3</sub>-4-NO<sub>2</sub>-substituted

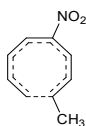

|   |             |             |             |
|---|-------------|-------------|-------------|
| C | -1.94679600 | 0.90860100  | 1.13886400  |
| C | -1.64295300 | 1.90316000  | 0.24470200  |
| C | -0.38325100 | 2.07476600  | -0.37616800 |
| C | 0.73234300  | 1.25960800  | -0.43176600 |
| C | 1.04747000  | -0.07497500 | -0.04770300 |
| C | 0.36388000  | -1.24055600 | 0.26097300  |
| C | -1.00772900 | -1.54047700 | 0.19183300  |
| C | -1.97044200 | -0.77915400 | -0.43555700 |
| H | -1.15372700 | 0.40072500  | 1.67099700  |
| H | -2.93928300 | 0.84759700  | 1.57798600  |
| H | -2.43558800 | 2.57891700  | -0.07329000 |
| H | -0.26009400 | 3.01502600  | -0.90983800 |
| H | 1.59629300  | 1.75806200  | -0.85942300 |
| H | 0.99872400  | -2.04220300 | 0.62281100  |

|   |             |             |             |
|---|-------------|-------------|-------------|
| H | -1.63119100 | -0.05377400 | -1.16725500 |
| C | -3.39900400 | -1.22579600 | -0.55038400 |
| H | -3.68849000 | -1.85672100 | 0.29507700  |
| H | -4.08147700 | -0.37270300 | -0.60219200 |
| H | -3.53428300 | -1.80724200 | -1.47105200 |
| H | -1.32947300 | -2.43235600 | 0.72927200  |
| N | 2.54572200  | -0.28297600 | -0.00476500 |
| O | 3.26153700  | 0.70353600  | -0.00084300 |
| O | 2.97314200  | -1.42423000 | 0.03228100  |

1- NH<sub>2</sub>-4-CH<sub>3</sub>-substituted

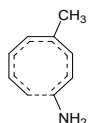

|   |             |             |             |
|---|-------------|-------------|-------------|
| C | -1.25892900 | 0.92609600  | 1.10885000  |
| C | -0.83377100 | 1.94776900  | 0.27430000  |
| C | 0.41254700  | 1.96501100  | -0.36305400 |
| C | 1.42934200  | 1.00392600  | -0.40780900 |
| C | 1.62790600  | -0.34532400 | -0.02086200 |
| C | 0.74346200  | -1.39360700 | 0.28721000  |
| C | -0.63685700 | -1.54299900 | 0.16255700  |
| C | -1.51412300 | -0.63083200 | -0.42975000 |
| H | -0.51411400 | 0.35607500  | 1.64880700  |
| H | -2.24256500 | 0.98341400  | 1.57079100  |
| H | -1.53605900 | 2.73656100  | 0.00600300  |
| H | 0.65015600  | 2.88104000  | -0.90155900 |
| H | 2.34684000  | 1.42525500  | -0.82489400 |
| H | 1.23639300  | -2.28204100 | 0.67853300  |
| H | -1.11218300 | 0.05410000  | -1.16608400 |
| N | -2.85158400 | -0.95992600 | -0.63546700 |
| H | -3.26729700 | -1.53263100 | 0.09025200  |
| H | -3.44883300 | -0.17856900 | -0.87490200 |
| H | -1.07607800 | -2.43334700 | 0.61384500  |
| C | 3.10539600  | -0.73115000 | -0.00535600 |
| H | 3.68576200  | -0.07598400 | 0.65294300  |
| H | 3.25352400  | -1.76097100 | 0.32874900  |
| H | 3.53569900  | -0.64676500 | -1.01072500 |

1- NH<sub>2</sub>-4-NH<sub>2</sub>-substituted

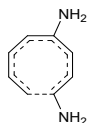

|   |             |             |             |
|---|-------------|-------------|-------------|
| C | -1.21122300 | 0.94523000  | 1.12100300  |
| C | -0.76803000 | 1.96740700  | 0.29816300  |
| C | 0.46822600  | 1.95496200  | -0.36264500 |
| C | 1.45436500  | 0.97138000  | -0.45491700 |
| C | 1.63296000  | -0.37576100 | -0.03612700 |
| C | 0.73608600  | -1.40522400 | 0.29635100  |
| C | -0.64534300 | -1.53467100 | 0.15054200  |
| C | -1.51078600 | -0.61252700 | -0.43550200 |
| H | -0.47799800 | 0.34351300  | 1.64290000  |
| H | -2.18948500 | 1.02085200  | 1.59208100  |
| H | -1.45149200 | 2.77710700  | 0.04601400  |

|   |             |             |             |
|---|-------------|-------------|-------------|
| H | 0.71190200  | 2.86309700  | -0.91166900 |
| H | 2.35973800  | 1.33484300  | -0.94218100 |
| H | 1.21621100  | -2.28697300 | 0.71954400  |
| H | -1.10567300 | 0.07642500  | -1.16644200 |
| N | -2.85878600 | -0.91906000 | -0.63302800 |
| H | -3.27392300 | -1.48432200 | 0.09924200  |
| H | -3.44118000 | -0.11806200 | -0.84462000 |
| H | -1.09720100 | -2.41212500 | 0.61468700  |
| N | 3.00410400  | -0.75792500 | -0.07397800 |
| H | 3.17435900  | -1.71377600 | 0.21304700  |
| H | 3.61998000  | -0.12646200 | 0.42523500  |

1- NH<sub>2</sub>-4-OH-substituted

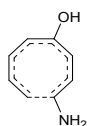

|   |             |             |             |
|---|-------------|-------------|-------------|
| C | -1.18925600 | 0.97769800  | 1.10867700  |
| C | -0.73510900 | 1.97842800  | 0.26898800  |
| C | 0.51733300  | 1.95844600  | -0.36194400 |
| C | 1.49847500  | 0.96916600  | -0.41626600 |
| C | 1.62450000  | -0.38500000 | -0.02491100 |
| C | 0.73114600  | -1.41258800 | 0.29959300  |
| C | -0.65434200 | -1.52903800 | 0.16800500  |
| C | -1.50738900 | -0.61212900 | -0.43974700 |
| H | -0.46453600 | 0.37509000  | 1.64137700  |
| H | -2.17187100 | 1.06310800  | 1.56804200  |
| H | -1.41156000 | 2.78713200  | -0.00438900 |
| H | 0.78555900  | 2.86600300  | -0.89978300 |
| H | 2.44180900  | 1.31712200  | -0.83412300 |
| H | 1.21350800  | -2.29361200 | 0.72360600  |
| H | -1.09344200 | 0.06721800  | -1.17463100 |
| N | -2.85726600 | -0.90209800 | -0.63309700 |
| H | -3.28387800 | -1.45072300 | 0.10498800  |
| H | -3.42963100 | -0.10074900 | -0.86833900 |
| H | -1.11270600 | -2.39537500 | 0.64561400  |
| O | 2.96967200  | -0.73687300 | -0.00003200 |
| H | 3.05808400  | -1.69544600 | -0.08478700 |

1- NH<sub>2</sub>-4-F-substituted

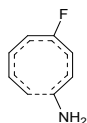

|   |             |             |             |
|---|-------------|-------------|-------------|
| C | -1.13344100 | 1.01089800  | 1.10207100  |
| C | -0.65730800 | 1.99410400  | 0.25426100  |
| C | 0.59895400  | 1.94849700  | -0.36757400 |
| C | 1.54889200  | 0.92789100  | -0.39516700 |
| C | 1.58248200  | -0.42857700 | -0.02627000 |
| C | 0.69264600  | -1.45788700 | 0.26745400  |
| C | -0.69598100 | -1.53115800 | 0.16503200  |
| C | -1.52316100 | -0.58090600 | -0.43269000 |
| H | -0.42333000 | 0.39043300  | 1.63422700  |
| H | -2.11149100 | 1.12351900  | 1.56435500  |
| H | -1.31455300 | 2.81758600  | -0.02192400 |

|   |             |             |             |
|---|-------------|-------------|-------------|
| H | 0.90042400  | 2.84870000  | -0.89919600 |
| H | 2.52096000  | 1.23456000  | -0.77836900 |
| H | 1.19383300  | -2.35304300 | 0.62748900  |
| H | -1.09309600 | 0.08163300  | -1.17369800 |
| N | -2.88053000 | -0.82003300 | -0.60743100 |
| H | -3.32561300 | -1.35497600 | 0.12914700  |
| H | -3.43064000 | -0.01144000 | -0.86707200 |
| H | -1.17459400 | -2.39317200 | 0.62904600  |
| F | 2.88259100  | -0.88230400 | 0.00059000  |

1- NH<sub>2</sub>-4-CHO-substituted

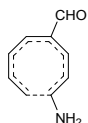

|   |             |             |             |
|---|-------------|-------------|-------------|
| C | -1.60166300 | 0.90289900  | 1.07993800  |
| C | -1.15000300 | 1.93527000  | 0.26929700  |
| C | 0.12623500  | 1.98493900  | -0.30393800 |
| C | 1.14591100  | 1.03080500  | -0.31488900 |
| C | 1.29916400  | -0.32847600 | 0.04578000  |
| C | 0.42296200  | -1.40273700 | 0.32081300  |
| C | -0.94134800 | -1.55949600 | 0.16353700  |
| C | -1.79595900 | -0.61978200 | -0.44632400 |
| H | -0.87688200 | 0.35089400  | 1.66355500  |
| H | -2.60460200 | 0.95369000  | 1.49830700  |
| H | -1.85178600 | 2.71597700  | -0.02393000 |
| H | 0.38061700  | 2.91483600  | -0.80883600 |
| H | 2.09522700  | 1.43196900  | -0.67022700 |
| H | 0.92748500  | -2.28682100 | 0.71176000  |
| H | -1.35897500 | 0.04501400  | -1.18187200 |
| N | -3.11908400 | -0.94181300 | -0.69383700 |
| H | -3.57563200 | -1.51547300 | 0.00516800  |
| H | -3.70725400 | -0.18340200 | -1.01264000 |
| H | -1.39697900 | -2.46015700 | 0.57377300  |
| C | 2.73032500  | -0.75974700 | 0.08845000  |
| H | 2.88650900  | -1.80285900 | 0.43442200  |
| O | 3.68776400  | -0.08412800 | -0.21857700 |

1-NH<sub>2</sub>-4-CN-substituted

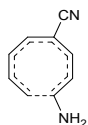

|   |             |             |             |
|---|-------------|-------------|-------------|
| C | -1.57075400 | 0.81714800  | 1.10997800  |
| C | -1.26303900 | 1.87652500  | 0.27040700  |
| C | -0.02144000 | 2.05210300  | -0.35268200 |
| C | 1.09461300  | 1.21309700  | -0.39367700 |
| C | 1.39109900  | -0.12612600 | -0.02735000 |
| C | 0.64489200  | -1.28722600 | 0.28613500  |
| C | -0.70370700 | -1.57303000 | 0.17092100  |
| C | -1.66673200 | -0.74185300 | -0.42935300 |
| H | -0.76985000 | 0.34107800  | 1.66002400  |
| H | -2.55681700 | 0.76241300  | 1.56567500  |
| H | -2.05298600 | 2.57574900  | -0.00229500 |
| H | 0.11675600  | 2.99568400  | -0.87606900 |

|   |             |             |             |
|---|-------------|-------------|-------------|
| H | 1.97486000  | 1.71704500  | -0.79024800 |
| H | 1.25179600  | -2.10540500 | 0.66678000  |
| H | -1.32578400 | -0.03188800 | -1.17329400 |
| N | -2.95400600 | -1.19745000 | -0.63270300 |
| H | -3.33009300 | -1.81949200 | 0.07243800  |
| H | -3.62805300 | -0.51388300 | -0.94993700 |
| H | -1.05241900 | -2.50815400 | 0.60755400  |
| C | 2.81828500  | -0.38212300 | -0.01829200 |
| N | 3.95876000  | -0.58886900 | -0.00689000 |

1-NH<sub>2</sub>-4-NO<sub>2</sub>-substituted

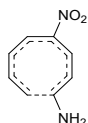

|   |             |             |             |
|---|-------------|-------------|-------------|
| C | -1.95556600 | 0.79174500  | 1.11368900  |
| C | -1.66607100 | 1.86493300  | 0.28389500  |
| C | -0.42707600 | 2.08047300  | -0.33035100 |
| C | 0.71848000  | 1.28203200  | -0.37067200 |
| C | 1.04029700  | -0.04315700 | -0.02454300 |
| C | 0.34094100  | -1.22823300 | 0.26779000  |
| C | -0.99795800 | -1.54337600 | 0.15138600  |
| C | -1.99364100 | -0.73797400 | -0.43854600 |
| H | -1.15088500 | 0.33473800  | 1.67391100  |
| H | -2.94489900 | 0.71196100  | 1.55841300  |
| H | -2.47319400 | 2.54315700  | 0.00807400  |
| H | -0.31875500 | 3.02822800  | -0.85277600 |
| H | 1.58516200  | 1.81138700  | -0.75426700 |
| H | 0.97162100  | -2.02744000 | 0.63986500  |
| H | -1.68117400 | -0.01519200 | -1.18285400 |
| N | -3.26048500 | -1.24271200 | -0.64170600 |
| H | -3.61066200 | -1.88903500 | 0.05476600  |
| H | -3.96276600 | -0.59052400 | -0.96307400 |
| H | -1.32002600 | -2.48898900 | 0.58585300  |
| N | 2.52911900  | -0.26626400 | -0.01353900 |
| O | 3.26466700  | 0.70532200  | -0.07550700 |
| O | 2.94392100  | -1.41208600 | 0.06337300  |

1-OH-4-CH<sub>3</sub>-substituted

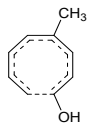

|   |             |             |             |
|---|-------------|-------------|-------------|
| C | -1.27243900 | 0.95166100  | 1.09005100  |
| C | -0.83017100 | 1.95716800  | 0.25289500  |
| C | 0.43077500  | 1.96583700  | -0.36401000 |
| C | 1.43477100  | 0.99899800  | -0.40425500 |
| C | 1.61659300  | -0.35741800 | -0.01440100 |
| C | 0.72273600  | -1.39672100 | 0.26566500  |
| C | -0.66394300 | -1.53479400 | 0.12487800  |
| C | -1.53215800 | -0.61829800 | -0.45228700 |
| H | -0.54192800 | 0.36580800  | 1.63352900  |
| H | -2.26857700 | 1.00813300  | 1.52203000  |
| H | -1.52772900 | 2.74029900  | -0.04037600 |
| H | 0.68181200  | 2.88193600  | -0.89628200 |

|   |             |             |             |
|---|-------------|-------------|-------------|
| H | 2.35954900  | 1.40884400  | -0.81600200 |
| H | 1.20041300  | -2.29730100 | 0.64725200  |
| H | -1.18245900 | 0.07560400  | -1.20369200 |
| O | -2.86327900 | -0.86788100 | -0.59064600 |
| H | -3.12208300 | -1.60211500 | -0.01266200 |
| H | -1.11077000 | -2.42223400 | 0.57710600  |
| C | 3.09161500  | -0.74719500 | 0.03446200  |
| H | 3.22956400  | -1.78009600 | 0.36294600  |
| H | 3.54617200  | -0.65326900 | -0.95922100 |
| H | 3.65558900  | -0.09798400 | 0.71255400  |

1-OH-4-NH<sub>2</sub>-substituted

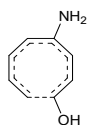

|   |             |             |             |
|---|-------------|-------------|-------------|
| C | -1.22501400 | 0.96792300  | 1.09893200  |
| C | -0.76187800 | 1.97773100  | 0.27851500  |
| C | 0.48818400  | 1.95480600  | -0.36206900 |
| C | 1.46164000  | 0.96429700  | -0.44841200 |
| C | 1.62169400  | -0.38918000 | -0.02710400 |
| C | 0.71238700  | -1.40941500 | 0.27821900  |
| C | -0.67332400 | -1.52566200 | 0.11208200  |
| C | -1.52881800 | -0.59452700 | -0.45619500 |
| H | -0.50701600 | 0.35180100  | 1.62625000  |
| H | -2.21594700 | 1.04435600  | 1.54012300  |
| H | -1.43926400 | 2.78422300  | 0.00354700  |
| H | 0.74694300  | 2.86214300  | -0.90548200 |
| H | 2.37511300  | 1.31647600  | -0.92841600 |
| H | 1.17551800  | -2.30369700 | 0.69314200  |
| H | -1.17400800 | 0.10226300  | -1.20254500 |
| O | -2.86783500 | -0.82151300 | -0.58744900 |
| H | -3.13480800 | -1.55373300 | -0.01108100 |
| H | -1.13484300 | -2.40103500 | 0.57321100  |
| N | 2.98939700  | -0.77642200 | -0.03622100 |
| H | 3.15407200  | -1.73066800 | 0.25895400  |
| H | 3.60191600  | -0.14090900 | 0.46163500  |

1-OH-4-OH-substituted

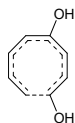

|   |             |             |             |
|---|-------------|-------------|-------------|
| C | -1.20319400 | 1.00003200  | 1.08306000  |
| C | -0.72832500 | 1.98863100  | 0.24681400  |
| C | 0.53975300  | 1.95876000  | -0.35861900 |
| C | 1.50735300  | 0.96208400  | -0.40520900 |
| C | 1.61299400  | -0.39948300 | -0.01601300 |
| C | 0.70680500  | -1.41865300 | 0.27710900  |
| C | -0.68361200 | -1.52101400 | 0.12835600  |
| C | -1.52593700 | -0.59387400 | -0.46086400 |
| H | -0.49391300 | 0.38493600  | 1.62337500  |
| H | -2.19900200 | 1.08506700  | 1.51076000  |
| H | -1.39812500 | 2.79340100  | -0.05083400 |
| H | 0.82577100  | 2.86642800  | -0.88713000 |

|   |             |             |             |
|---|-------------|-------------|-------------|
| H | 2.45983700  | 1.29893400  | -0.81084700 |
| H | 1.17146600  | -2.31473000 | 0.68841300  |
| H | -1.16132600 | 0.09185200  | -1.21261600 |
| O | -2.86681900 | -0.80056900 | -0.58796100 |
| H | -3.14773300 | -1.51643200 | 0.00219900  |
| H | -1.15140700 | -2.38494200 | 0.60356400  |
| O | 2.95398200  | -0.75534000 | 0.03609800  |
| H | 3.04211000  | -1.71615100 | -0.01978800 |

#### 1-OH-4-F-substituted

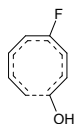

|   |             |             |             |
|---|-------------|-------------|-------------|
| C | -1.14462800 | 1.04192700  | 1.07524400  |
| C | -0.64568600 | 2.00751000  | 0.22770300  |
| C | 0.62841900  | 1.94762800  | -0.36439300 |
| C | 1.56030300  | 0.91719600  | -0.38291200 |
| C | 1.56816900  | -0.44633100 | -0.01742800 |
| C | 0.66467400  | -1.46344800 | 0.24769500  |
| C | -0.72998200 | -1.52131900 | 0.12925500  |
| C | -1.54234200 | -0.56390900 | -0.45516700 |
| H | -0.45252900 | 0.40735500  | 1.61555700  |
| H | -2.13664900 | 1.15631400  | 1.50397000  |
| H | -1.29391100 | 2.82753500  | -0.07602700 |
| H | 0.95215800  | 2.84692800  | -0.88454400 |
| H | 2.54196400  | 1.20807600  | -0.75331400 |
| H | 1.14828900  | -2.37161700 | 0.59836000  |
| H | -1.15829700 | 0.10707400  | -1.21053500 |
| O | -2.88815600 | -0.71464400 | -0.56545400 |
| H | -3.19262000 | -1.42266600 | 0.02291800  |
| H | -1.21889600 | -2.37723600 | 0.59630000  |
| F | 2.86246500  | -0.90890400 | 0.03899500  |

#### 1-OH-4-CHO-substituted

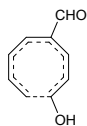

|   |             |             |             |
|---|-------------|-------------|-------------|
| C | -1.60872800 | 0.93694800  | 1.07427600  |
| C | -1.15386100 | 1.94307100  | 0.24522600  |
| C | 0.13468800  | 1.98632700  | -0.31597400 |
| C | 1.14407300  | 1.03116700  | -0.32692700 |
| C | 1.28732200  | -0.33426600 | 0.04128100  |
| C | 0.41082400  | -1.40146700 | 0.29391000  |
| C | -0.96259900 | -1.55457700 | 0.13013600  |
| C | -1.80900400 | -0.62260400 | -0.47117800 |
| H | -0.89094700 | 0.36695700  | 1.65000200  |
| H | -2.62075700 | 0.98070500  | 1.46849000  |
| H | -1.85632200 | 2.71121600  | -0.07552400 |
| H | 0.39537000  | 2.91615300  | -0.81794600 |
| H | 2.09637600  | 1.42284300  | -0.68398300 |
| H | 0.90709700  | -2.29465800 | 0.67425200  |
| H | -1.42511100 | 0.06004800  | -1.21652200 |
| O | -3.12974900 | -0.86064700 | -0.65151200 |

|   |             |             |             |
|---|-------------|-------------|-------------|
| H | -3.41981200 | -1.59088200 | -0.08258600 |
| H | -1.41968800 | -2.45014000 | 0.55253500  |
| C | 2.71869500  | -0.76761200 | 0.11266300  |
| H | 2.86775900  | -1.81023000 | 0.46282300  |
| O | 3.67944600  | -0.09109300 | -0.17749000 |

1-OH-4-CN-substituted

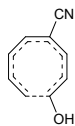

|   |             |             |             |
|---|-------------|-------------|-------------|
| C | -1.58225400 | 0.84693700  | 1.10438100  |
| C | -1.26741100 | 1.88276700  | 0.25030300  |
| C | -0.01156900 | 2.05489700  | -0.35944100 |
| C | 1.09386600  | 1.21415300  | -0.40302800 |
| C | 1.38126800  | -0.13424800 | -0.03356600 |
| C | 0.63291400  | -1.28924600 | 0.25091000  |
| C | -0.72573300 | -1.57232200 | 0.12962300  |
| C | -1.68307400 | -0.74770000 | -0.45511000 |
| H | -0.78819600 | 0.34996000  | 1.64680200  |
| H | -2.57776200 | 0.78538700  | 1.53610400  |
| H | -2.05657800 | 2.57119100  | -0.04802200 |
| H | 0.13358800  | 3.00120300  | -0.87619900 |
| H | 1.97859800  | 1.70925300  | -0.80025300 |
| H | 1.23187000  | -2.12003600 | 0.61608800  |
| H | -1.40341400 | -0.02337600 | -1.20771700 |
| O | -2.97613300 | -1.12155400 | -0.58592000 |
| H | -3.16764400 | -1.87905200 | -0.01086000 |
| H | -1.07356700 | -2.50497700 | 0.57482300  |
| C | 2.80922000  | -0.38772000 | 0.00744700  |
| N | 3.94983000  | -0.58889000 | 0.04392500  |

1-OH-4-NO<sub>2</sub>-substituted

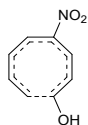

|   |             |             |             |
|---|-------------|-------------|-------------|
| C | -1.96364000 | 0.74711700  | 1.15865800  |
| C | -1.67775700 | 1.84711500  | 0.37712100  |
| C | -0.43025800 | 2.09908300  | -0.22099800 |
| C | 0.70593300  | 1.30533600  | -0.32550100 |
| C | 1.02594900  | -0.04115700 | -0.03721000 |
| C | 0.33594900  | -1.23674700 | 0.16502800  |
| C | -1.01008600 | -1.55418100 | 0.01254200  |
| C | -1.99976900 | -0.72563600 | -0.51378000 |
| H | -1.15857900 | 0.23775200  | 1.67212700  |
| H | -2.95806200 | 0.63016400  | 1.58130900  |
| H | -2.48756100 | 2.53031600  | 0.12540600  |
| H | -0.32068200 | 3.08026400  | -0.67755300 |
| H | 1.57091500  | 1.84437700  | -0.69846500 |
| H | 0.96709100  | -2.05712100 | 0.48745100  |
| H | -1.74867000 | 0.06081700  | -1.21191700 |
| O | -3.27403100 | -1.14272400 | -0.67826200 |
| H | -3.43445000 | -1.95017000 | -0.16467700 |
| H | -1.32479200 | -2.52835600 | 0.38751300  |



|   |            |             |             |
|---|------------|-------------|-------------|
| N | 2.52237200 | -0.26050700 | -0.00189200 |
| O | 3.24655200 | 0.58209800  | -0.50134700 |
| O | 2.94251000 | -1.27313300 | 0.53172100  |

1-F-4-CH<sub>3</sub>-substituted

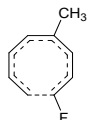

|   |             |             |             |
|---|-------------|-------------|-------------|
| C | -1.30379300 | 0.97354200  | 1.09705000  |
| C | -0.86603000 | 1.95968400  | 0.24505500  |
| C | 0.39873300  | 1.96315100  | -0.37850600 |
| C | 1.40298900  | 1.00503200  | -0.42630300 |
| C | 1.60970300  | -0.34881500 | -0.01246300 |
| C | 0.74070100  | -1.39956700 | 0.26817200  |
| C | -0.65193200 | -1.55948000 | 0.12742000  |
| C | -1.50643400 | -0.66177200 | -0.45669400 |
| H | -0.57874900 | 0.36836300  | 1.62628800  |
| H | -2.30248100 | 1.02003500  | 1.52369200  |
| H | -1.56267200 | 2.74008900  | -0.05698500 |
| H | 0.64332100  | 2.87833300  | -0.91550000 |
| H | 2.31724500  | 1.41474700  | -0.86036600 |
| H | 1.23174300  | -2.29116700 | 0.65273000  |
| H | -1.21808500 | 0.04787200  | -1.21953900 |
| F | -2.81792400 | -0.97838800 | -0.52016800 |
| H | -1.10990400 | -2.43235900 | 0.58814900  |
| C | 3.09298300  | -0.69745500 | 0.05901300  |
| H | 3.25469000  | -1.72301400 | 0.39855900  |
| H | 3.55633700  | -0.59793200 | -0.92993700 |
| H | 3.62834500  | -0.02538400 | 0.73796000  |

1-F-4-NH<sub>2</sub>-substituted

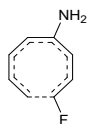

|   |             |             |             |
|---|-------------|-------------|-------------|
| C | -1.25123800 | 0.99617200  | 1.10474000  |
| C | -0.78771100 | 1.98589800  | 0.27057200  |
| C | 0.46483500  | 1.95124800  | -0.37829900 |
| C | 1.43543500  | 0.96616100  | -0.46995900 |
| C | 1.61562200  | -0.38469000 | -0.02254800 |
| C | 0.72372000  | -1.41313100 | 0.28328600  |
| C | -0.66607500 | -1.54588700 | 0.11196800  |
| C | -1.51009400 | -0.63144000 | -0.46112500 |
| H | -0.54285700 | 0.35606700  | 1.61605000  |
| H | -2.24368600 | 1.06947300  | 1.54233300  |
| H | -1.45990300 | 2.79390400  | -0.01197000 |
| H | 0.71948200  | 2.85545200  | -0.92903500 |
| H | 2.33873300  | 1.31388200  | -0.97151800 |
| H | 1.19537000  | -2.29958600 | 0.70431800  |
| H | -1.22068100 | 0.08128900  | -1.22057600 |
| F | -2.82888400 | -0.93214500 | -0.51485600 |
| H | -1.14157400 | -2.40793100 | 0.57576400  |
| N | 2.98586700  | -0.73895600 | -0.00952800 |
| H | 3.17671200  | -1.67872900 | 0.31418900  |

|   |            |             |            |
|---|------------|-------------|------------|
| H | 3.59032300 | -0.06781100 | 0.44904100 |
|---|------------|-------------|------------|

1-F-4-OH-substituted

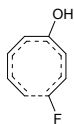

|   |             |             |             |
|---|-------------|-------------|-------------|
| C | -1.23307800 | 1.02743500  | 1.08540600  |
| C | -0.75801600 | 1.99610900  | 0.23612000  |
| C | 0.51542100  | 1.95793900  | -0.37198100 |
| C | 1.48248900  | 0.96859200  | -0.42214600 |
| C | 1.60807700  | -0.39309500 | -0.01194400 |
| C | 0.72011100  | -1.42217200 | 0.27721300  |
| C | -0.67526400 | -1.54110500 | 0.12767200  |
| C | -1.50770500 | -0.63206300 | -0.46562400 |
| H | -0.53295000 | 0.39160400  | 1.61341000  |
| H | -2.23206600 | 1.10628600  | 1.50622100  |
| H | -1.42376100 | 2.80021800  | -0.07174800 |
| H | 0.79915600  | 2.86475300  | -0.90341500 |
| H | 2.42777900  | 1.30590500  | -0.84355900 |
| H | 1.19347600  | -2.31380900 | 0.68747800  |
| H | -1.20982700 | 0.06920800  | -1.23232100 |
| F | -2.82927000 | -0.91332100 | -0.51085900 |
| H | -1.15576400 | -2.39166400 | 0.60665000  |
| O | 2.95252700  | -0.71358700 | 0.05525600  |
| H | 3.06496300  | -1.67375300 | 0.06466800  |

1-F-4-F-substituted

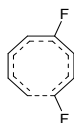

|   |             |             |             |
|---|-------------|-------------|-------------|
| C | -1.17471000 | 1.07334500  | 1.07807800  |
| C | -0.67716500 | 2.01619500  | 0.21479500  |
| C | 0.60376500  | 1.94825900  | -0.37746800 |
| C | 1.53487500  | 0.92506900  | -0.39981500 |
| C | 1.56222900  | -0.44072400 | -0.01325000 |
| C | 0.67930700  | -1.46744600 | 0.25009500  |
| C | -0.72263200 | -1.54304600 | 0.13268800  |
| C | -1.52258500 | -0.60693500 | -0.46156900 |
| H | -0.49223900 | 0.41955100  | 1.60750300  |
| H | -2.17115600 | 1.18036300  | 1.49792900  |
| H | -1.32182900 | 2.83404900  | -0.10163800 |
| H | 0.92619900  | 2.84729900  | -0.89917900 |
| H | 2.50968300  | 1.21665200  | -0.78699100 |
| H | 1.17385300  | -2.36826400 | 0.60361800  |
| H | -1.20047200 | 0.08071700  | -1.23091800 |
| F | -2.85270400 | -0.82690300 | -0.49122300 |
| H | -1.22392000 | -2.38052700 | 0.61232800  |
| F | 2.86396800  | -0.86844700 | 0.06411500  |

1-F-4-CHO-substituted

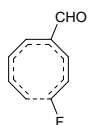

|   |             |             |             |
|---|-------------|-------------|-------------|
| C | -1.63178100 | 0.97618700  | 1.08797000  |
| C | -1.17768200 | 1.95138500  | 0.23507400  |
| C | 0.11611500  | 1.97931500  | -0.33424000 |
| C | 1.11935400  | 1.02655300  | -0.35353400 |
| C | 1.27733700  | -0.33828600 | 0.03978600  |
| C | 0.42262200  | -1.41012300 | 0.29479900  |
| C | -0.96133100 | -1.57877100 | 0.13581800  |
| C | -1.78494700 | -0.66887600 | -0.47943300 |
| H | -0.92191600 | 0.37827400  | 1.64491700  |
| H | -2.64604200 | 1.01433200  | 1.47639300  |
| H | -1.87469500 | 2.71897900  | -0.09806300 |
| H | 0.37710200  | 2.90665000  | -0.84099800 |
| H | 2.06499100  | 1.41372800  | -0.73176800 |
| H | 0.92780000  | -2.29742900 | 0.67649200  |
| H | -1.45552300 | 0.03438900  | -1.23189900 |
| F | -3.09301200 | -0.95921200 | -0.58047400 |
| H | -1.43342800 | -2.45267300 | 0.57805800  |
| C | 2.71847800  | -0.74676600 | 0.13208100  |
| H | 2.88235700  | -1.77993800 | 0.50123700  |
| O | 3.66593500  | -0.05589000 | -0.16250300 |

#### 1-F-4-CN-substituted

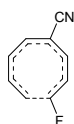

|   |             |             |             |
|---|-------------|-------------|-------------|
| C | -1.60686300 | 0.88297700  | 1.11886400  |
| C | -1.28971000 | 1.88875100  | 0.24200300  |
| C | -0.02861000 | 2.04450400  | -0.37838900 |
| C | 1.06945700  | 1.20489700  | -0.43257000 |
| C | 1.37176100  | -0.14231400 | -0.03913600 |
| C | 0.64315100  | -1.29834100 | 0.24608700  |
| C | -0.72459700 | -1.59496300 | 0.13097500  |
| C | -1.66147300 | -0.78897700 | -0.46221000 |
| H | -0.81892300 | 0.35665900  | 1.64236600  |
| H | -2.60323600 | 0.81928500  | 1.54782400  |
| H | -2.07279200 | 2.57945500  | -0.06639700 |
| H | 0.11643400  | 2.98802400  | -0.90068300 |
| H | 1.94656900  | 1.69228400  | -0.85496100 |
| H | 1.24881600  | -2.12426600 | 0.61049500  |
| H | -1.44634800 | -0.05092200 | -1.22213000 |
| F | -2.93288800 | -1.21816100 | -0.50692300 |
| H | -1.08915400 | -2.50913200 | 0.59325300  |
| C | 2.80500100  | -0.36673000 | 0.02269900  |
| N | 3.94941900  | -0.53811000 | 0.07465700  |

#### 1-F-4-NO<sub>2</sub>-substituted

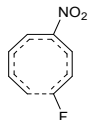

|   |             |             |             |
|---|-------------|-------------|-------------|
| C | -1.98455700 | 0.76605100  | 1.18319400  |
| C | -1.69986900 | 1.84693800  | 0.38831700  |
| C | -0.44710800 | 2.09311900  | -0.21917400 |
| C | 0.68081500  | 1.30149500  | -0.34501700 |
| C | 1.01309500  | -0.04744900 | -0.04334600 |
| C | 0.35090500  | -1.24801600 | 0.15190800  |
| C | -1.00305000 | -1.58495400 | -0.00195900 |
| C | -1.96734000 | -0.76908800 | -0.53516900 |
| H | -1.18225000 | 0.22432900  | 1.66732000  |
| H | -2.97886100 | 0.63857800  | 1.60254700  |
| H | -2.50554100 | 2.53437200  | 0.13571000  |
| H | -0.33825000 | 3.07751600  | -0.66937800 |
| H | 1.53853300  | 1.83508300  | -0.74256600 |
| H | 0.99319900  | -2.06083300 | 0.47299500  |
| H | -1.77510500 | 0.03627000  | -1.23044800 |
| F | -3.22007700 | -1.24058200 | -0.62545400 |
| H | -1.33423300 | -2.54613200 | 0.38294500  |
| N | 2.51429300  | -0.24047800 | 0.00859400  |
| O | 2.94708800  | -1.15769800 | 0.68249300  |
| O | 3.21613700  | 0.52780200  | -0.62283400 |

#### 1-CHO-4-CH<sub>3</sub>-substituted

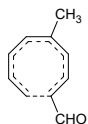

|   |             |             |             |
|---|-------------|-------------|-------------|
| C | -0.85987900 | 1.33177000  | 1.03271400  |
| C | -0.15097500 | 2.20054000  | 0.23427700  |
| C | 1.11886500  | 1.93394200  | -0.31224000 |
| C | 1.90657200  | 0.78683100  | -0.36190900 |
| C | 1.83321400  | -0.59553600 | -0.01195100 |
| C | 0.77383500  | -1.47124300 | 0.24418200  |
| C | -0.61360600 | -1.33427000 | 0.09507700  |
| C | -1.26179500 | -0.28216000 | -0.52283000 |
| H | -0.33926900 | 0.55933300  | 1.58326400  |
| H | -1.83920100 | 1.61161700  | 1.41313400  |
| H | -0.62458200 | 3.13175800  | -0.07177600 |
| H | 1.58751800  | 2.79067600  | -0.79461500 |
| H | 2.90229400  | 1.02418300  | -0.74102200 |
| H | 1.08474800  | -2.44481500 | 0.61825400  |
| H | -0.72756300 | 0.32634200  | -1.24220800 |
| C | -2.73911600 | -0.25659200 | -0.58652400 |
| H | -3.17605400 | 0.48543100  | -1.28401400 |
| O | -3.46386100 | -0.96287300 | 0.08354600  |
| H | -1.24266900 | -2.09216100 | 0.56101400  |
| C | 3.21761900  | -1.23262300 | 0.04557400  |
| H | 3.68616800  | -1.20784100 | -0.94555900 |
| H | 3.87675700  | -0.68994900 | 0.73102800  |
| H | 3.17433500  | -2.27554100 | 0.36590900  |

#### 1-CHO-4-NH<sub>2</sub>-substituted

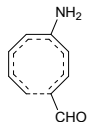

|   |             |             |             |
|---|-------------|-------------|-------------|
| C | -0.80086800 | 1.33342500  | 1.03066100  |
| C | -0.06029100 | 2.20554800  | 0.26359200  |
| C | 1.19319100  | 1.90348400  | -0.30149400 |
| C | 1.94064500  | 0.73664700  | -0.39814100 |
| C | 1.83167200  | -0.64099500 | -0.02194000 |
| C | 0.74229600  | -1.48630000 | 0.26174700  |
| C | -0.62819100 | -1.31790700 | 0.07661200  |
| C | -1.26192500 | -0.24485200 | -0.53259800 |
| H | -0.30373700 | 0.53648200  | 1.56876000  |
| H | -1.77188000 | 1.63432100  | 1.41632200  |
| H | -0.50247600 | 3.15777200  | -0.02208500 |
| H | 1.67797800  | 2.74779900  | -0.78984500 |
| H | 2.91897800  | 0.91937900  | -0.84270100 |
| H | 1.03038600  | -2.45030800 | 0.67908000  |
| H | -0.72460800 | 0.35692100  | -1.25547800 |
| C | -2.73336700 | -0.20104700 | -0.58264700 |
| H | -3.16613200 | 0.55492300  | -1.26822000 |
| O | -3.46659100 | -0.90320200 | 0.08663300  |
| H | -1.27834100 | -2.06280100 | 0.53509500  |
| N | 3.07990400  | -1.27493300 | -0.01717800 |
| H | 3.09398500  | -2.23573800 | 0.29661000  |
| H | 3.86028100  | -0.73661700 | 0.33489600  |

#### 1-CHO-4-OH-substituted

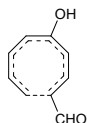

|   |             |             |             |
|---|-------------|-------------|-------------|
| C | -0.77236100 | 1.36585800  | 1.01955800  |
| C | -0.02650800 | 2.20793600  | 0.22864900  |
| C | 1.24030700  | 1.89260100  | -0.30118700 |
| C | 1.97932100  | 0.71909700  | -0.35560800 |
| C | 1.81807700  | -0.65413400 | -0.01253300 |
| C | 0.73730500  | -1.50024400 | 0.25954500  |
| C | -0.63785800 | -1.31651500 | 0.09517900  |
| C | -1.25359300 | -0.25032100 | -0.53449400 |
| H | -0.28488500 | 0.57129400  | 1.57003400  |
| H | -1.74392800 | 1.67948600  | 1.39279400  |
| H | -0.46019000 | 3.15609100  | -0.08282200 |
| H | 1.74990700  | 2.72945600  | -0.77625600 |
| H | 2.99136400  | 0.87198300  | -0.72554000 |
| H | 1.02631900  | -2.46920700 | 0.66751800  |
| H | -0.70442800 | 0.33867600  | -1.25905100 |
| C | -2.72624800 | -0.18254500 | -0.58653600 |
| H | -3.14699300 | 0.56913700  | -1.28350000 |
| O | -3.46756800 | -0.86610200 | 0.09109300  |
| H | -1.29339800 | -2.04617200 | 0.56963900  |
| O | 3.06047100  | -1.24437600 | 0.03313100  |
| H | 2.97235000  | -2.20731600 | 0.05795800  |

#### 1-CHO-4-F-substituted

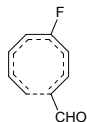

|   |             |             |             |
|---|-------------|-------------|-------------|
| C | -0.72117300 | 1.38519500  | 1.02300900  |
| C | 0.02501100  | 2.20075300  | 0.20925200  |
| C | 1.29294600  | 1.86830100  | -0.31319800 |
| C | 2.00521400  | 0.67927100  | -0.34097500 |
| C | 1.77329000  | -0.68046900 | -0.01263900 |
| C | 0.71579100  | -1.54301300 | 0.22525900  |
| C | -0.66396300 | -1.33340600 | 0.09012200  |
| C | -1.25321100 | -0.25539700 | -0.53574900 |
| H | -0.24513200 | 0.57972400  | 1.56789500  |
| H | -1.68597900 | 1.71457000  | 1.39942000  |
| H | -0.39824000 | 3.15053600  | -0.11170300 |
| H | 1.82267500  | 2.69367700  | -0.78540900 |
| H | 3.03189600  | 0.79468800  | -0.68349400 |
| H | 1.03761200  | -2.52034100 | 0.57557200  |
| H | -0.68966900 | 0.32516200  | -1.25628700 |
| C | -2.72652800 | -0.13827400 | -0.57728200 |
| H | -3.12879000 | 0.62154400  | -1.27574100 |
| O | -3.48003300 | -0.79590200 | 0.10978700  |
| H | -1.32792400 | -2.05320800 | 0.56691200  |
| F | 2.97106200  | -1.33743300 | 0.05752800  |

#### 1-CHO-4-CHO-substituted

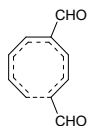

|   |             |             |             |
|---|-------------|-------------|-------------|
| C | -1.24355600 | 1.32828100  | 1.03928200  |
| C | -0.58401800 | 2.21483500  | 0.22354900  |
| C | 0.72124000  | 2.03547100  | -0.28611400 |
| C | 1.57341400  | 0.94159800  | -0.30619700 |
| C | 1.53523100  | -0.44276900 | 0.03542300  |
| C | 0.54589000  | -1.39893500 | 0.27255900  |
| C | -0.84705000 | -1.35421500 | 0.11385300  |
| C | -1.52784300 | -0.34252000 | -0.52970100 |
| H | -0.68799100 | 0.59051800  | 1.60303300  |
| H | -2.24577700 | 1.55012700  | 1.39715100  |
| H | -1.11497100 | 3.10535300  | -0.10931700 |
| H | 1.14891100  | 2.92298700  | -0.74976200 |
| H | 2.57578000  | 1.20582600  | -0.64198200 |
| H | 0.92803600  | -2.35040100 | 0.64298200  |
| H | -1.00320800 | 0.28993000  | -1.23564200 |
| C | -3.00822900 | -0.37758400 | -0.62160600 |
| H | -3.46381800 | 0.33784500  | -1.33332300 |
| O | -3.70714300 | -1.11108300 | 0.04322000  |
| H | -1.43906000 | -2.14292300 | 0.57560600  |
| C | 2.91399500  | -1.04687400 | 0.11888500  |
| H | 2.93638700  | -2.09894600 | 0.46715100  |
| O | 3.94355200  | -0.48317200 | -0.16515700 |

#### 1-CHO-4-CN-substituted

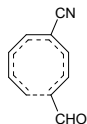

|   |             |             |             |
|---|-------------|-------------|-------------|
| C | -1.20892500 | 1.29365000  | 1.06814600  |
| C | -0.63990200 | 2.22178500  | 0.23438900  |
| C | 0.65640200  | 2.13079800  | -0.32189900 |
| C | 1.58122200  | 1.10074400  | -0.37945500 |
| C | 1.63763600  | -0.29162800 | -0.03833400 |
| C | 0.72470300  | -1.31762400 | 0.22109700  |
| C | -0.67297600 | -1.35102900 | 0.09352100  |
| C | -1.43561500 | -0.39239100 | -0.53457200 |
| H | -0.58943900 | 0.58235700  | 1.59839600  |
| H | -2.21106700 | 1.44410400  | 1.46098400  |
| H | -1.23725900 | 3.07765200  | -0.07473100 |
| H | 1.00805400  | 3.04461600  | -0.79742300 |
| H | 2.54383300  | 1.44132100  | -0.75630500 |
| H | 1.18075000  | -2.23843100 | 0.57728700  |
| H | -0.97718100 | 0.28429900  | -1.24545100 |
| C | -2.91258900 | -0.52716900 | -0.58540400 |
| H | -3.43457800 | 0.15371100  | -1.28508200 |
| O | -3.54134800 | -1.30521400 | 0.09772100  |
| H | -1.20044800 | -2.17517300 | 0.57117400  |
| C | 3.01373300  | -0.75645400 | 0.02195600  |
| N | 4.11228600  | -1.11954700 | 0.07038700  |

1-CHO-4-NO<sub>2</sub>-substituted

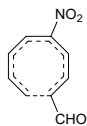

|   |             |             |             |
|---|-------------|-------------|-------------|
| C | -1.62272400 | 1.30727200  | 1.06129600  |
| C | -1.10454100 | 2.24921000  | 0.21052400  |
| C | 0.19272000  | 2.22059400  | -0.35080700 |
| C | 1.17655200  | 1.24700400  | -0.39513700 |
| C | 1.29015300  | -0.12811900 | -0.05416200 |
| C | 0.45484300  | -1.20389800 | 0.19970400  |
| C | -0.94218200 | -1.30585700 | 0.09164900  |
| C | -1.76391200 | -0.39720300 | -0.53444400 |
| H | -0.96836300 | 0.63310100  | 1.59809800  |
| H | -2.62992800 | 1.41377900  | 1.45551700  |
| H | -1.74736600 | 3.06741000  | -0.10954800 |
| H | 0.48767500  | 3.14313200  | -0.84708900 |
| H | 2.11970800  | 1.63126800  | -0.76993500 |
| H | 0.96884600  | -2.09567700 | 0.54225800  |
| H | -1.35284600 | 0.29921000  | -1.25490400 |
| C | -3.23277300 | -0.61748000 | -0.56678700 |
| H | -3.80153800 | 0.02343500  | -1.26741500 |
| O | -3.80573500 | -1.42297200 | 0.13244600  |
| H | -1.41869100 | -2.15040800 | 0.58653300  |
| N | 2.75224900  | -0.53778100 | 0.02178500  |
| O | 3.58416500  | 0.34321300  | 0.13973600  |
| O | 3.02006400  | -1.72398000 | -0.02931000 |

1-CN-4-CH<sub>3</sub>-substituted

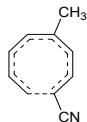

|   |             |             |             |
|---|-------------|-------------|-------------|
| C | -0.92063700 | 1.19481200  | 1.12198100  |
| C | -0.37241200 | 2.10673600  | 0.24689200  |
| C | 0.86991800  | 1.94066600  | -0.39153700 |
| C | 1.75444700  | 0.86645800  | -0.45421800 |
| C | 1.82500200  | -0.49818200 | -0.04251000 |
| C | 0.86427300  | -1.45030400 | 0.31118300  |
| C | -0.53575600 | -1.45264000 | 0.23911100  |
| C | -1.30715900 | -0.46629400 | -0.35316800 |
| H | -0.27014300 | 0.51058300  | 1.65219100  |
| H | -1.89446400 | 1.37910100  | 1.56790000  |
| H | -0.96393100 | 2.97092100  | -0.04864100 |
| H | 1.21576600  | 2.81306700  | -0.94406200 |
| H | 2.69709100  | 1.17057800  | -0.91278400 |
| H | 1.27974200  | -2.37786800 | 0.69891500  |
| H | -0.87183000 | 0.15870700  | -1.12206100 |
| C | -2.73726400 | -0.59743500 | -0.39590500 |
| N | -3.89336300 | -0.67725100 | -0.41396700 |
| H | -1.05166300 | -2.26164000 | 0.75203300  |
| C | 3.26110800  | -1.01180000 | -0.04497400 |
| H | 3.66949900  | -0.98648900 | -1.06215000 |
| H | 3.90625300  | -0.38754100 | 0.58145200  |
| H | 3.32809900  | -2.04075700 | 0.31384000  |

#### 1-CN-4-NH<sub>2</sub>-substituted

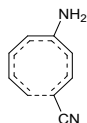

|   |             |             |             |
|---|-------------|-------------|-------------|
| C | -0.87393500 | 1.19279400  | 1.11884300  |
| C | -0.29767000 | 2.11783000  | 0.27462600  |
| C | 0.93238900  | 1.92405100  | -0.37948200 |
| C | 1.78312200  | 0.83066100  | -0.48888700 |
| C | 1.83113900  | -0.53258500 | -0.05376200 |
| C | 0.84701000  | -1.46425500 | 0.32502500  |
| C | -0.54286200 | -1.44443600 | 0.21744500  |
| C | -1.30573900 | -0.43852200 | -0.36299500 |
| H | -0.24059000 | 0.48350100  | 1.63791800  |
| H | -1.84332100 | 1.39205600  | 1.56830700  |
| H | -0.86474600 | 3.00354600  | -0.00244000 |
| H | 1.28924600  | 2.78952200  | -0.93605800 |
| H | 2.70622200  | 1.08396200  | -1.00997800 |
| H | 1.24883000  | -2.38220700 | 0.75035200  |
| H | -0.86864800 | 0.18322800  | -1.13385200 |
| C | -2.73512400 | -0.55552700 | -0.39580500 |
| N | -3.89286400 | -0.62204100 | -0.40128100 |
| H | -1.07384500 | -2.24722300 | 0.72516500  |
| N | 3.13316100  | -1.04557400 | -0.10570200 |
| H | 3.25915500  | -1.98937200 | 0.23366700  |
| H | 3.87562900  | -0.42378100 | 0.18575000  |

#### 1-CN-4-OH-substituted



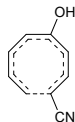

|   |             |             |             |
|---|-------------|-------------|-------------|
| C | -0.85188700 | 1.22034700  | 1.10634100  |
| C | -0.27210300 | 2.12084100  | 0.24143700  |
| C | 0.97525400  | 1.92263300  | -0.37935000 |
| C | 1.82454200  | 0.82602400  | -0.44832900 |
| C | 1.82069100  | -0.54005200 | -0.04679800 |
| C | 0.84630200  | -1.47548800 | 0.31883300  |
| C | -0.54818100 | -1.44375300 | 0.23381300  |
| C | -1.29904100 | -0.44476000 | -0.36527600 |
| H | -0.22432300 | 0.51446100  | 1.63691700  |
| H | -1.82435000 | 1.42748800  | 1.54497900  |
| H | -0.83556400 | 3.00190500  | -0.05747200 |
| H | 1.35664700  | 2.78641100  | -0.92153100 |
| H | 2.78946900  | 1.05993100  | -0.89401300 |
| H | 1.25170600  | -2.39764800 | 0.73427500  |
| H | -0.85407800 | 0.16778900  | -1.13893800 |
| C | -2.73013400 | -0.54183800 | -0.39359900 |
| N | -3.88823400 | -0.59457600 | -0.39808900 |
| H | -1.08192300 | -2.23487300 | 0.75613000  |
| O | 3.11522000  | -1.00677400 | -0.05788500 |
| H | 3.12563000  | -1.97297000 | -0.01308100 |

#### 1-CN-4-F-substituted

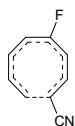

|   |             |             |             |
|---|-------------|-------------|-------------|
| C | -0.80777900 | 1.23778900  | 1.10585900  |
| C | -0.22643700 | 2.11645600  | 0.22305300  |
| C | 1.02620100  | 1.90790900  | -0.38757500 |
| C | 1.85562000  | 0.79635300  | -0.43049100 |
| C | 1.77988400  | -0.56467200 | -0.04590000 |
| C | 0.82846100  | -1.51725900 | 0.28384300  |
| C | -0.57055200 | -1.46228500 | 0.22820600  |
| C | -1.30062700 | -0.45067400 | -0.36786100 |
| H | -0.18948600 | 0.52059600  | 1.63222400  |
| H | -1.77657800 | 1.45784600  | 1.54572200  |
| H | -0.78266000 | 2.99953700  | -0.08372600 |
| H | 1.42850900  | 2.76587300  | -0.92300700 |
| H | 2.84116700  | 0.99893400  | -0.84566700 |
| H | 1.26513700  | -2.44695800 | 0.63844800  |
| H | -0.84525200 | 0.15768100  | -1.13880800 |
| C | -2.73485500 | -0.50323100 | -0.38186900 |
| N | -3.89359400 | -0.52003600 | -0.37653200 |
| H | -1.11200500 | -2.24765000 | 0.75042200  |
| F | 3.03631600  | -1.10310200 | -0.03371800 |

#### 1-CN-4-CHO-substituted

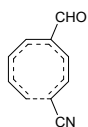

|   |             |             |             |
|---|-------------|-------------|-------------|
| C | -1.29020000 | 1.19819600  | 1.12814800  |
| C | -0.75847800 | 2.10526400  | 0.24236400  |
| C | 0.51951100  | 1.99712700  | -0.34591400 |
| C | 1.44057600  | 0.95968600  | -0.37004100 |
| C | 1.50674300  | -0.40546400 | 0.03454000  |
| C | 0.59285700  | -1.40970800 | 0.35989500  |
| C | -0.80435100 | -1.46928800 | 0.26512500  |
| C | -1.57739500 | -0.51019200 | -0.36419100 |
| H | -0.63338600 | 0.54036100  | 1.68297300  |
| H | -2.28472100 | 1.34907000  | 1.53902300  |
| H | -1.37958900 | 2.93601300  | -0.08756500 |
| H | 0.85301300  | 2.88687000  | -0.87722900 |
| H | 2.40410900  | 1.26836900  | -0.77469200 |
| H | 1.05071400  | -2.32004400 | 0.74657300  |
| H | -1.12910100 | 0.12592300  | -1.11652100 |
| C | -3.00352500 | -0.66533300 | -0.44741000 |
| N | -4.15637800 | -0.76625100 | -0.50067300 |
| H | -1.30777000 | -2.29175400 | 0.76753500  |
| C | 2.92369900  | -0.92093300 | 0.07221900  |
| H | 3.02960100  | -1.95353600 | 0.46106900  |
| O | 3.89939600  | -0.30670500 | -0.28560800 |

1-CN-4-CN-substituted

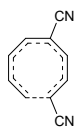

|   |             |             |             |
|---|-------------|-------------|-------------|
| C | -1.25035200 | 1.16877200  | 1.14408700  |
| C | -0.81451900 | 2.10302500  | 0.23721900  |
| C | 0.44594900  | 2.08057100  | -0.39692900 |
| C | 1.43881500  | 1.11419900  | -0.45475200 |
| C | 1.60464400  | -0.24944200 | -0.04660100 |
| C | 0.77517700  | -1.31868200 | 0.30732000  |
| C | -0.61876000 | -1.46120800 | 0.24826600  |
| C | -1.47321000 | -0.56552000 | -0.36495800 |
| H | -0.53467400 | 0.54980800  | 1.67025700  |
| H | -2.23912200 | 1.25206100  | 1.58674600  |
| H | -1.50127000 | 2.88770700  | -0.07415900 |
| H | 0.69819200  | 2.98665000  | -0.94425500 |
| H | 2.35514800  | 1.49592700  | -0.90116400 |
| H | 1.30826400  | -2.18986300 | 0.67990400  |
| H | -1.09425500 | 0.10564000  | -1.12465800 |
| C | -2.88701800 | -0.81545600 | -0.40070900 |
| N | -4.03173000 | -0.99229900 | -0.41468100 |
| H | -1.05076800 | -2.31266300 | 0.76860000  |
| C | 3.00888400  | -0.62410700 | -0.03578700 |
| N | 4.12899000  | -0.91744000 | -0.02592000 |

1-CN-4-NO<sub>2</sub>-substituted

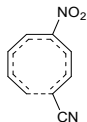

|   |             |             |             |
|---|-------------|-------------|-------------|
| C | -1.65368100 | 1.17601600  | 1.14659000  |
| C | -1.25354200 | 2.12059200  | 0.23413300  |
| C | 0.00743000  | 2.14771000  | -0.39924400 |
| C | 1.04426200  | 1.22876900  | -0.44860900 |
| C | 1.24656900  | -0.11852400 | -0.05007700 |
| C | 0.48104400  | -1.22562500 | 0.28284900  |
| C | -0.90785900 | -1.41777800 | 0.23544900  |
| C | -1.80470400 | -0.55983000 | -0.37018800 |
| H | -0.91626600 | 0.58583900  | 1.67566300  |
| H | -2.64536500 | 1.22392300  | 1.58803500  |
| H | -1.97137200 | 2.87493900  | -0.08239600 |
| H | 0.21825900  | 3.05885800  | -0.95524600 |
| H | 1.94677900  | 1.64443100  | -0.88497300 |
| H | 1.05663400  | -2.07424000 | 0.63608900  |
| H | -1.46249900 | 0.12683000  | -1.13359000 |
| C | -3.20665800 | -0.87289100 | -0.39426900 |
| N | -4.34189000 | -1.10256000 | -0.39860600 |
| H | -1.30044600 | -2.28324200 | 0.76365100  |
| N | 2.73157100  | -0.45000600 | -0.02142900 |
| O | 3.52006000  | 0.47683700  | -0.01592900 |
| O | 3.05860700  | -1.62183800 | 0.00508000  |

1-NO<sub>2</sub>-4-CH<sub>3</sub>-substituted

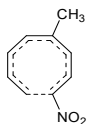

|   |             |             |             |
|---|-------------|-------------|-------------|
| C | -0.51432100 | 1.21267000  | 1.26575100  |
| C | 0.05518400  | 2.14376600  | 0.43261400  |
| C | 1.27874500  | 1.95985800  | -0.24551400 |
| C | 2.10609600  | 0.85542900  | -0.40638400 |
| C | 2.12240000  | -0.54021100 | -0.08947900 |
| C | 1.12557200  | -1.47107500 | 0.20357100  |
| C | -0.27656700 | -1.39464200 | 0.16654100  |
| C | -0.98846700 | -0.33321100 | -0.33108700 |
| H | 0.10536000  | 0.45437700  | 1.72848700  |
| H | -1.47457800 | 1.40687000  | 1.73772400  |
| H | -0.50276300 | 3.04727900  | 0.19633600  |
| H | 1.65499600  | 2.85147200  | -0.74495000 |
| H | 3.05044500  | 1.14483100  | -0.87053900 |
| H | 1.49957900  | -2.44556900 | 0.50850900  |
| H | -0.62652000 | 0.33629200  | -1.09521800 |
| N | -2.44338400 | -0.38365100 | -0.30242100 |
| O | -3.02652500 | 0.37137100  | -1.06568900 |
| O | -2.98973600 | -1.13463300 | 0.49108400  |
| H | -0.84228000 | -2.19582300 | 0.63624500  |
| C | 3.53501700  | -1.10949600 | -0.14316800 |
| H | 3.93482900  | -1.03079000 | -1.16101400 |
| H | 4.20982000  | -0.55378800 | 0.51586000  |
| H | 3.56293200  | -2.16202600 | 0.14528000  |

1-NO<sub>2</sub>-4-NH<sub>2</sub>-substituted

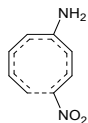

|   |             |             |             |
|---|-------------|-------------|-------------|
| C | -0.47568100 | 1.19616800  | 1.25732500  |
| C | 0.12188900  | 2.14336600  | 0.46090400  |
| C | 1.33373100  | 1.93968900  | -0.23143000 |
| C | 2.13075000  | 0.82458900  | -0.43934600 |
| C | 2.12916700  | -0.57132800 | -0.10210600 |
| C | 1.11045300  | -1.48846800 | 0.21531000  |
| C | -0.27800600 | -1.39223200 | 0.14096500  |
| C | -0.98634100 | -0.31240300 | -0.34090300 |
| H | 0.12740100  | 0.41808500  | 1.71053400  |
| H | -1.43427700 | 1.39940300  | 1.72924000  |
| H | -0.41368700 | 3.06459100  | 0.24475000  |
| H | 1.71828100  | 2.82634300  | -0.73353200 |
| H | 3.05156400  | 1.07451300  | -0.96581100 |
| H | 1.47524500  | -2.45435200 | 0.55911200  |
| H | -0.62466100 | 0.35664300  | -1.10557800 |
| N | -2.43345300 | -0.35327100 | -0.30030800 |
| O | -3.02146900 | 0.44706000  | -1.01504000 |
| O | -2.98322400 | -1.13774100 | 0.46167100  |
| H | -0.85820000 | -2.19137100 | 0.59679000  |
| N | 3.40339400  | -1.12652800 | -0.20154100 |
| H | 3.50604700  | -2.09673400 | 0.06141000  |
| H | 4.18447000  | -0.54936800 | 0.07867100  |

1-NO<sub>2</sub>-4-OH-substituted

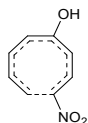

|   |             |             |             |
|---|-------------|-------------|-------------|
| C | -0.45198500 | 1.22749000  | 1.24674900  |
| C | 0.14772800  | 2.14719100  | 0.42376900  |
| C | 1.37771300  | 1.93396800  | -0.23500000 |
| C | 2.17311300  | 0.81190500  | -0.40048300 |
| C | 2.11732800  | -0.58196100 | -0.09591100 |
| C | 1.10805400  | -1.50028300 | 0.20745600  |
| C | -0.28538200 | -1.39249800 | 0.15996700  |
| C | -0.98109400 | -0.32052200 | -0.34353900 |
| H | 0.14461100  | 0.45187600  | 1.71247700  |
| H | -1.41243200 | 1.44224400  | 1.70927800  |
| H | -0.38408700 | 3.06467500  | 0.18305800  |
| H | 1.78850200  | 2.81622900  | -0.72317400 |
| H | 3.13810000  | 1.03387400  | -0.85176500 |
| H | 1.47427900  | -2.47116500 | 0.53899000  |
| H | -0.61262600 | 0.33952500  | -1.11275300 |
| N | -2.43134300 | -0.34181700 | -0.29719400 |
| O | -3.00937600 | 0.44513700  | -1.03271500 |
| O | -2.98560700 | -1.10041900 | 0.48558100  |
| H | -0.86720600 | -2.17839300 | 0.63589100  |
| O | 3.38899200  | -1.09426300 | -0.15691700 |
| H | 3.36534400  | -2.06152200 | -0.15728400 |

1-NO<sub>2</sub>-4-F-substituted

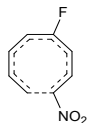

|   |             |             |             |
|---|-------------|-------------|-------------|
| C | -0.41006600 | 1.24115700  | 1.24929900  |
| C | 0.18730100  | 2.13887200  | 0.40466700  |
| C | 1.42313800  | 1.91624600  | -0.24495200 |
| C | 2.20005600  | 0.77991500  | -0.38615100 |
| C | 2.07569800  | -0.60541800 | -0.09575000 |
| C | 1.09179900  | -1.54024300 | 0.17173300  |
| C | -0.30659000 | -1.41529900 | 0.15370800  |
| C | -0.98065900 | -0.33592900 | -0.35048700 |
| H | 0.17720800  | 0.45548000  | 1.71010300  |
| H | -1.36668300 | 1.46768300  | 1.71359800  |
| H | -0.33896900 | 3.05732900  | 0.15506200  |
| H | 1.85269100  | 2.79227300  | -0.72729900 |
| H | 3.18369100  | 0.96938400  | -0.81178600 |
| H | 1.49108300  | -2.51357900 | 0.44275200  |
| H | -0.60069000 | 0.32433400  | -1.11401900 |
| N | -2.43386800 | -0.31461400 | -0.28870500 |
| O | -2.99367700 | 0.48300300  | -1.02520100 |
| O | -2.99860400 | -1.05292800 | 0.50339800  |
| H | -0.89375400 | -2.19371300 | 0.63475500  |
| F | 3.30963100  | -1.18592200 | -0.13557900 |

1-NO<sub>2</sub>-4-CHO-substituted

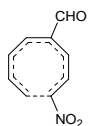

|   |             |             |             |
|---|-------------|-------------|-------------|
| C | -0.87594400 | 1.24892400  | 1.28079000  |
| C | -0.32786900 | 2.16844900  | 0.42612400  |
| C | 0.93555200  | 2.03596800  | -0.19982300 |
| C | 1.80496000  | 0.96543100  | -0.31527000 |
| C | 1.82017900  | -0.42789100 | 0.00362300  |
| C | 0.87214100  | -1.41095500 | 0.27149600  |
| C | -0.53306400 | -1.39603100 | 0.21105900  |
| C | -1.25282700 | -0.36879200 | -0.33397300 |
| H | -0.24533600 | 0.51729000  | 1.77061200  |
| H | -1.85744900 | 1.41451300  | 1.71817300  |
| H | -0.91892600 | 3.03888100  | 0.14840100  |
| H | 1.29813100  | 2.94236800  | -0.68175400 |
| H | 2.77095400  | 1.25520700  | -0.72772500 |
| H | 1.29294800  | -2.36741700 | 0.58032000  |
| H | -0.88047400 | 0.30798700  | -1.08681600 |
| N | -2.71069300 | -0.44928600 | -0.34650900 |
| O | -3.28206900 | 0.27564900  | -1.14441500 |
| O | -3.25986400 | -1.19803600 | 0.44469100  |
| H | -1.08281100 | -2.20788800 | 0.68024500  |
| C | 3.21708400  | -1.00041300 | -0.00831400 |
| H | 3.28577100  | -2.05894400 | 0.31244900  |
| O | 4.21078000  | -0.40075400 | -0.33810400 |

1-NO<sub>2</sub>-4-CN-substituted

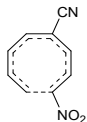

|   |             |             |             |
|---|-------------|-------------|-------------|
| C | -0.83090300 | 1.24814700  | 1.28381200  |
| C | -0.36307400 | 2.19275100  | 0.41088000  |
| C | 0.88509200  | 2.13225600  | -0.25490800 |
| C | 1.81648600  | 1.11957700  | -0.39868200 |
| C | 1.91625700  | -0.27678000 | -0.07350100 |
| C | 1.03720000  | -1.31828900 | 0.22011500  |
| C | -0.36821100 | -1.37070000 | 0.18950900  |
| C | -1.16124600 | -0.39392700 | -0.34321000 |
| H | -0.14936000 | 0.54836800  | 1.75164700  |
| H | -1.80775000 | 1.35971300  | 1.74776300  |
| H | -1.00965400 | 3.02791600  | 0.14987200  |
| H | 1.17758300  | 3.05452900  | -0.75330200 |
| H | 2.74128800  | 1.47424800  | -0.84987100 |
| H | 1.52259500  | -2.24340800 | 0.51980200  |
| H | -0.85260300 | 0.30852200  | -1.10160800 |
| N | -2.61175100 | -0.55906200 | -0.31101400 |
| O | -3.24898300 | 0.14439800  | -1.07742200 |
| O | -3.09051700 | -1.35042300 | 0.48388600  |
| H | -0.86004800 | -2.20925100 | 0.67570300  |
| C | 3.30062700  | -0.71951400 | -0.09966700 |
| N | 4.40612000  | -1.06287600 | -0.11724400 |

1-NO<sub>2</sub>-4-NO<sub>2</sub>-substituted

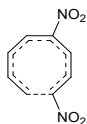

|   |             |             |             |
|---|-------------|-------------|-------------|
| C | -1.24801200 | 1.18844600  | 1.36914700  |
| C | -0.81691600 | 2.20431200  | 0.55988200  |
| C | 0.43807800  | 2.24502600  | -0.09434600 |
| C | 1.41812000  | 1.28954400  | -0.29657900 |
| C | 1.56177100  | -0.10345000 | -0.04862600 |
| C | 0.75953500  | -1.20760100 | 0.16740500  |
| C | -0.64207400 | -1.32930800 | 0.10789600  |
| C | -1.47929500 | -0.36437100 | -0.37314100 |
| H | -0.54105000 | 0.48971800  | 1.79902100  |
| H | -2.23348100 | 1.22677600  | 1.82677800  |
| H | -1.50005900 | 3.02333700  | 0.34440800  |
| H | 0.68899300  | 3.20968700  | -0.53103500 |
| H | 2.32589800  | 1.69767300  | -0.73012200 |
| H | 1.29928700  | -2.11063800 | 0.43107200  |
| H | -1.20195500 | 0.40475800  | -1.07698300 |
| N | -2.92004500 | -0.60835000 | -0.37270600 |
| O | -3.58441800 | 0.10494600  | -1.10579400 |
| O | -3.36430400 | -1.47011000 | 0.36641100  |
| H | -1.09302300 | -2.22252000 | 0.53241400  |
| N | 3.02742300  | -0.50600000 | -0.09385400 |
| O | 3.37397300  | -1.44133600 | 0.60076100  |
| O | 3.76931100  | 0.12475900  | -0.82130900 |

5.3.5 1,5-substituted

1-CH<sub>3</sub>-5-CH<sub>3</sub>-substituted

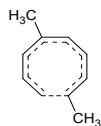

|   |             |             |             |
|---|-------------|-------------|-------------|
| C | 0.91485300  | -1.18184100 | 1.12008100  |
| C | -0.00231500 | -1.85691800 | 0.34929900  |
| C | -1.21763600 | -1.32637000 | -0.13387300 |
| C | -1.73879200 | -0.03509500 | -0.11902600 |
| C | -1.19477200 | 1.23703500  | 0.24706800  |
| C | 0.05010600  | 1.83547900  | 0.40367300  |
| C | 1.35995000  | 1.38095400  | 0.15456100  |
| C | 1.67942000  | 0.20971200  | -0.49956500 |
| H | 0.59783100  | -0.32773100 | 1.70318100  |
| H | 1.81948600  | -1.68499600 | 1.45310700  |
| H | 0.25079300  | -2.85898200 | 0.00435300  |
| H | -1.87258600 | -2.06692500 | -0.59041700 |
| H | -1.99607100 | 1.96268700  | 0.40018100  |
| H | -0.00721000 | 2.85042400  | 0.79504400  |
| H | 0.92171900  | -0.21009100 | -1.15239100 |
| C | 3.10007400  | -0.18891600 | -0.78790000 |
| H | 3.78192300  | 0.18727600  | -0.01878600 |
| H | 3.20596800  | -1.27659100 | -0.84361400 |
| H | 3.42180100  | 0.21915300  | -1.75444700 |
| H | 2.17196100  | 1.96859800  | 0.58509700  |
| C | -3.20597500 | 0.07636100  | -0.52219600 |
| H | -3.81246400 | 0.39601500  | 0.33396500  |
| H | -3.34746700 | 0.81717900  | -1.31603200 |
| H | -3.60516700 | -0.87841500 | -0.87197700 |

1-CH<sub>3</sub>-5-NH<sub>2</sub>-substituted

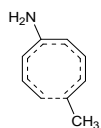

|   |             |             |             |
|---|-------------|-------------|-------------|
| C | 0.87846200  | -1.20659000 | 1.15440000  |
| C | -0.03909800 | -1.85498500 | 0.36248300  |
| C | -1.22236800 | -1.31235900 | -0.17473400 |
| C | -1.74924200 | -0.01963500 | -0.13862100 |
| C | -1.21274000 | 1.24577600  | 0.27351700  |
| C | 0.03578100  | 1.83518100  | 0.40834400  |
| C | 1.34540000  | 1.38477200  | 0.14476500  |
| C | 1.66231000  | 0.20826400  | -0.49753900 |
| H | 0.58592300  | -0.33583100 | 1.72551500  |
| H | 1.76705500  | -1.73268800 | 1.49370300  |
| H | 0.20686000  | -2.85941900 | 0.01831500  |
| H | -1.85531100 | -2.02208100 | -0.70601800 |
| H | -2.01395600 | 1.95581500  | 0.48296300  |
| H | -0.01649300 | 2.84236600  | 0.82003000  |
| H | 0.89789900  | -0.23232900 | -1.12868200 |
| C | 3.08095900  | -0.19097400 | -0.78952000 |
| H | 3.76816000  | 0.20353100  | -0.03461000 |
| H | 3.18963600  | -1.27904300 | -0.82420500 |
| H | 3.39195400  | 0.19893800  | -1.76725300 |

|   |             |             |             |
|---|-------------|-------------|-------------|
| H | 2.15739900  | 1.97883300  | 0.56519200  |
| N | -3.07828100 | 0.06387200  | -0.61053600 |
| H | -3.51229500 | 0.97352700  | -0.52988400 |
| H | -3.69564900 | -0.67541900 | -0.29988000 |

1-CH<sub>3</sub>-5-OH-substituted

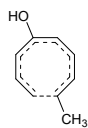

|   |             |             |             |
|---|-------------|-------------|-------------|
| C | -0.87183100 | 1.21137500  | 1.13593000  |
| C | 0.04468200  | 1.87032800  | 0.35228500  |
| C | 1.24334900  | 1.33312500  | -0.15813800 |
| C | 1.73673000  | 0.03584700  | -0.13795800 |
| C | 1.22759300  | -1.23773800 | 0.26571200  |
| C | -0.01301600 | -1.83808700 | 0.42124400  |
| C | -1.32361500 | -1.38942600 | 0.16262000  |
| C | -1.64049400 | -0.21958800 | -0.49309800 |
| H | -0.56796400 | 0.35149200  | 1.71760600  |
| H | -1.77079800 | 1.72548400  | 1.46613800  |
| H | -0.20390200 | 2.87222200  | 0.00413100  |
| H | 1.91738300  | 2.03117300  | -0.64868800 |
| H | 2.04766400  | -1.92856200 | 0.47106600  |
| H | 0.04881900  | -2.84257000 | 0.83725900  |
| H | -0.87708700 | 0.21052300  | -1.13305900 |
| C | -3.05915900 | 0.17620200  | -0.79038300 |
| H | -3.74548600 | -0.20205400 | -0.02650300 |
| H | -3.16636900 | 1.26340400  | -0.84710900 |
| H | -3.37215200 | -0.23310600 | -1.75937900 |
| H | -2.13466000 | -1.97882100 | 0.59098800  |
| O | 3.05942500  | -0.00321900 | -0.54735400 |
| H | 3.28372900  | -0.89566400 | -0.84289700 |

1-CH<sub>3</sub>-5-F-substituted

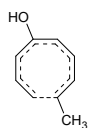

|   |             |             |             |
|---|-------------|-------------|-------------|
| C | 0.83318800  | -1.23380100 | 1.12010000  |
| C | -0.07775600 | -1.88057900 | 0.32300800  |
| C | -1.28020700 | -1.32026600 | -0.15845300 |
| C | -1.71245600 | -0.00995500 | -0.13803700 |
| C | -1.22063800 | 1.27685200  | 0.20458800  |
| C | 0.02132200  | 1.85857200  | 0.40041400  |
| C | 1.32961400  | 1.37541900  | 0.18937400  |
| C | 1.64209000  | 0.21602300  | -0.48382400 |
| H | 0.52482400  | -0.37992900 | 1.70880400  |
| H | 1.73357700  | -1.74743800 | 1.44655800  |
| H | 0.16199400  | -2.87838800 | -0.04103600 |
| H | -1.99164700 | -1.99849500 | -0.62301400 |
| H | -2.05366100 | 1.96938700  | 0.31142900  |
| H | -0.03477600 | 2.87463600  | 0.78707600  |
| H | 0.88450500  | -0.19154600 | -1.14543900 |
| C | 3.05917500  | -0.20259100 | -0.75596300 |
| H | 3.73570000  | 0.15102700  | 0.02814800  |



|   |             |             |             |
|---|-------------|-------------|-------------|
| H | 3.14751500  | -1.29057700 | -0.82796500 |
| H | 3.40016200  | 0.21528600  | -1.71159700 |
| H | 2.14121500  | 1.94256500  | 0.64606400  |
| F | -3.02393300 | 0.09504800  | -0.53180800 |

1-CH<sub>3</sub>-5-CHO-substituted

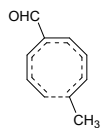

|   |             |             |             |
|---|-------------|-------------|-------------|
| C | 1.14509000  | -1.18139600 | 1.19849200  |
| C | 0.13738500  | -1.79734600 | 0.49865600  |
| C | -1.04895100 | -1.16455400 | 0.07620900  |
| C | -1.41265700 | 0.17787700  | 0.06726700  |
| C | -0.74787700 | 1.42065900  | 0.32273900  |
| C | 0.55042100  | 1.89776600  | 0.37435500  |
| C | 1.79184100  | 1.29054600  | 0.07012200  |
| C | 1.95877800  | 0.09601100  | -0.58725700 |
| H | 0.94516000  | -0.26437000 | 1.73609400  |
| H | 2.02587100  | -1.74159900 | 1.50210400  |
| H | 0.27095200  | -2.83355500 | 0.19213500  |
| H | -1.83108300 | -1.82159600 | -0.30138600 |
| H | -1.47223000 | 2.22077200  | 0.48562300  |
| H | 0.62424000  | 2.93103900  | 0.70961300  |
| H | 1.11578500  | -0.28739000 | -1.15175200 |
| C | 3.30908700  | -0.45504600 | -0.94536100 |
| H | 4.08338800  | -0.08372100 | -0.26720600 |
| H | 3.31411300  | -1.54887400 | -0.91454600 |
| H | 3.58040200  | -0.15971200 | -1.96663000 |
| H | 2.68410000  | 1.80308700  | 0.43252200  |
| C | -2.86368700 | 0.39067000  | -0.26326400 |
| H | -3.22150500 | 1.43366100  | -0.13927200 |
| O | -3.62947100 | -0.46235700 | -0.64863100 |

1-CH<sub>3</sub>-5-CN-substituted

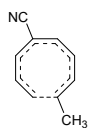

|   |             |             |             |
|---|-------------|-------------|-------------|
| C | -1.18570700 | 1.19459300  | 1.12093700  |
| C | -0.25551300 | 1.87437900  | 0.37355300  |
| C | 0.98512700  | 1.34834700  | -0.03816800 |
| C | 1.47573500  | 0.04347300  | 0.01476200  |
| C | 0.95118800  | -1.25290600 | 0.34349600  |
| C | -0.29761900 | -1.84035600 | 0.44904400  |
| C | -1.59589000 | -1.37207200 | 0.14647500  |
| C | -1.88811200 | -0.23028600 | -0.56220000 |
| H | -0.88196400 | 0.34182300  | 1.71286800  |
| H | -2.11541000 | 1.67866500  | 1.40873800  |
| H | -0.50080800 | 2.87036100  | 0.00954600  |
| H | 1.67979100  | 2.06965900  | -0.46257300 |
| H | 1.75668100  | -1.96244100 | 0.52426000  |
| H | -0.26293400 | -2.85563300 | 0.83998700  |
| H | -1.09976400 | 0.19119100  | -1.17656100 |
| C | -3.29250400 | 0.16784400  | -0.91587400 |

|   |             |             |             |
|---|-------------|-------------|-------------|
| H | -4.01106600 | -0.21438800 | -0.18470200 |
| H | -3.39711700 | 1.25545300  | -0.97327000 |
| H | -3.56142000 | -0.23537900 | -1.90011700 |
| H | -2.42701900 | -1.94635500 | 0.55772000  |
| C | 2.88918100  | -0.02809500 | -0.31441300 |
| N | 4.01510200  | -0.08892600 | -0.58022500 |

1-CH<sub>3</sub>-5-NO<sub>2</sub>-substituted

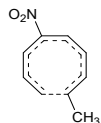

|   |             |             |             |
|---|-------------|-------------|-------------|
| C | 1.55940100  | -1.06310400 | 1.24907200  |
| C | 0.61876100  | -1.81541900 | 0.58949200  |
| C | -0.62907900 | -1.33899100 | 0.14023400  |
| C | -1.10369200 | -0.04012200 | 0.08242400  |
| C | -0.60246500 | 1.27640700  | 0.27794300  |
| C | 0.64674700  | 1.87299300  | 0.28985800  |
| C | 1.94113900  | 1.38284200  | 0.00671300  |
| C | 2.23098900  | 0.17765300  | -0.58928700 |
| H | 1.26413600  | -0.15445600 | 1.75660200  |
| H | 2.49371700  | -1.51600700 | 1.57088100  |
| H | 0.86093500  | -2.84264800 | 0.32425700  |
| H | -1.32677000 | -2.08767300 | -0.21955700 |
| H | -1.41235500 | 1.98353200  | 0.42511800  |
| H | 0.61616600  | 2.92118000  | 0.58101400  |
| H | 1.43617200  | -0.31168300 | -1.14135700 |
| C | 3.63186600  | -0.24614100 | -0.92505900 |
| H | 4.36058000  | 0.21800800  | -0.25381400 |
| H | 3.74428900  | -1.33283800 | -0.86517200 |
| H | 3.87868500  | 0.04809400  | -1.95270700 |
| H | 2.77576500  | 2.00136300  | 0.33906700  |
| N | -2.58592500 | -0.01282900 | -0.23352200 |
| O | -3.04819700 | -0.93535300 | -0.88045900 |
| O | -3.24578300 | 0.92613100  | 0.17320800  |

1- NH<sub>2</sub>-5-CH<sub>3</sub>-substituted

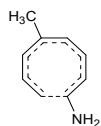

|   |             |             |             |
|---|-------------|-------------|-------------|
| C | 0.91807900  | -1.12584400 | 1.11255700  |
| C | -0.00664100 | -1.83868900 | 0.36653800  |
| C | -1.20481700 | -1.32094400 | -0.14146600 |
| C | -1.72764500 | -0.01827900 | -0.11459400 |
| C | -1.17057000 | 1.23802500  | 0.23025400  |
| C | 0.09903700  | 1.81730800  | 0.37854000  |
| C | 1.38738800  | 1.36322200  | 0.11460200  |
| C | 1.69902800  | 0.14586300  | -0.50239500 |
| H | 0.57644400  | -0.28297100 | 1.69882600  |
| H | 1.81110000  | -1.62931200 | 1.47718200  |
| H | 0.24762900  | -2.85325000 | 0.05914600  |
| H | -1.85494400 | -2.05832100 | -0.60914500 |
| H | -1.95295300 | 1.98712100  | 0.36364700  |
| H | 0.05892100  | 2.83524400  | 0.76340400  |

|   |             |             |             |
|---|-------------|-------------|-------------|
| H | 0.96356200  | -0.28220700 | -1.17265100 |
| N | 3.01335100  | -0.16367800 | -0.83516500 |
| H | 3.71101100  | 0.15207300  | -0.17134200 |
| H | 3.17182000  | -1.12408500 | -1.11174500 |
| H | 2.21759300  | 1.97838000  | 0.46184100  |
| C | -3.20569000 | 0.08497000  | -0.48021600 |
| H | -3.79475300 | 0.37300500  | 0.39887300  |
| H | -3.37674200 | 0.84280700  | -1.25148100 |
| H | -3.60115800 | -0.86653800 | -0.84331900 |

1- NH<sub>2</sub>-5-NH<sub>2</sub>-substituted

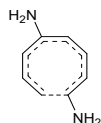

|   |             |             |             |
|---|-------------|-------------|-------------|
| C | -0.88300800 | 1.14722200  | 1.14575000  |
| C | 0.04188500  | 1.83446200  | 0.37803600  |
| C | 1.20769400  | 1.30561700  | -0.18333900 |
| C | 1.73853800  | 0.00219200  | -0.13020900 |
| C | 1.18878300  | -1.24941600 | 0.25569800  |
| C | -0.08512500 | -1.81952500 | 0.37581900  |
| C | -1.37208100 | -1.36672400 | 0.10351600  |
| C | -1.68074000 | -0.14174400 | -0.49912100 |
| H | -0.56398100 | 0.28749400  | 1.72019300  |
| H | -1.76053500 | 1.67181100  | 1.51693500  |
| H | -0.20709000 | 2.84995300  | 0.06823200  |
| H | 1.83568800  | 2.01122100  | -0.72491700 |
| H | 1.97131000  | -1.98483000 | 0.44432400  |
| H | -0.05075800 | -2.83266800 | 0.77389900  |
| H | -0.93789700 | 0.30577900  | -1.14902900 |
| N | -2.99002300 | 0.17113400  | -0.83258900 |
| H | -3.69518500 | -0.17099800 | -0.19052200 |
| H | -3.15350800 | 1.13490800  | -1.09291300 |
| H | -2.20234600 | -1.98629700 | 0.44104000  |
| N | 3.08006700  | -0.06540600 | -0.56464000 |
| H | 3.51728000  | -0.97343500 | -0.47945800 |
| H | 3.68104100  | 0.67445400  | -0.22408000 |

1- NH<sub>2</sub>-5-OH-substituted

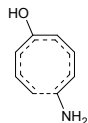

|   |             |             |             |
|---|-------------|-------------|-------------|
| C | -0.87915800 | 1.14845000  | 1.12740100  |
| C | 0.04616200  | 1.84872100  | 0.37187500  |
| C | 1.22872700  | 1.32766700  | -0.16197900 |
| C | 1.72750100  | 0.01992200  | -0.12773100 |
| C | 1.20375300  | -1.24034200 | 0.24786000  |
| C | -0.06297800 | -1.82159600 | 0.39017500  |
| C | -1.35053600 | -1.37209000 | 0.12031000  |
| C | -1.65828100 | -0.15262200 | -0.49645800 |
| H | -0.54887800 | 0.30070300  | 1.71319200  |
| H | -1.76762700 | 1.66098700  | 1.48909700  |
| H | -0.20458500 | 2.86324000  | 0.06205400  |
| H | 1.89719900  | 2.02496700  | -0.66023600 |

|   |             |             |             |
|---|-------------|-------------|-------------|
| H | 2.00379900  | -1.95949000 | 0.43129700  |
| H | -0.01884400 | -2.83146300 | 0.79458000  |
| H | -0.91534900 | 0.28303600  | -1.15456300 |
| N | -2.96660900 | 0.15601600  | -0.83682300 |
| H | -3.67420000 | -0.17375100 | -0.19098500 |
| H | -3.12898800 | 1.11427000  | -1.11743400 |
| H | -2.18015800 | -1.98845800 | 0.46471200  |
| O | 3.05797300  | -0.00394700 | -0.50576600 |
| H | 3.30895900  | -0.90323100 | -0.75654600 |

1- NH<sub>2</sub>-5-F-substituted

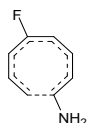

|   |             |             |             |
|---|-------------|-------------|-------------|
| C | 0.84013000  | -1.16351900 | 1.11691400  |
| C | -0.08135300 | -1.85787700 | 0.35256800  |
| C | -1.26525400 | -1.31581800 | -0.16022200 |
| C | -1.70068500 | 0.00645700  | -0.13008300 |
| C | -1.19507700 | 1.27570500  | 0.19336400  |
| C | 0.07369400  | 1.83878300  | 0.37762300  |
| C | 1.35765000  | 1.35737500  | 0.14611000  |
| C | 1.65552200  | 0.14482800  | -0.48750900 |
| H | 0.50420700  | -0.32064800 | 1.70695100  |
| H | 1.72878000  | -1.67517400 | 1.47868500  |
| H | 0.16015500  | -2.87176700 | 0.03539900  |
| H | -1.96714600 | -1.99326300 | -0.63913300 |
| H | -2.00921000 | 1.99153600  | 0.28553800  |
| H | 0.03633400  | 2.85532400  | 0.76438500  |
| H | 0.91488600  | -0.26978400 | -1.16134600 |
| N | 2.96161100  | -0.18382300 | -0.81171300 |
| H | 3.66846900  | 0.12148200  | -0.15342900 |
| H | 3.11202600  | -1.13606300 | -1.11760900 |
| H | 2.19244600  | 1.95328800  | 0.51374000  |
| F | -3.01999900 | 0.10180300  | -0.49819700 |

1- NH<sub>2</sub>-5-CHO-substituted

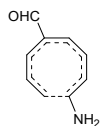

|   |             |             |             |
|---|-------------|-------------|-------------|
| C | 1.16483800  | -1.11429300 | 1.18333300  |
| C | 0.14537500  | -1.77504200 | 0.51741800  |
| C | -1.03066700 | -1.16769100 | 0.06847900  |
| C | -1.39866700 | 0.18541400  | 0.06542200  |
| C | -0.72908600 | 1.41333100  | 0.30006800  |
| C | 0.59073700  | 1.87198000  | 0.35060800  |
| C | 1.80868000  | 1.26808500  | 0.03570600  |
| C | 1.96414300  | 0.02548100  | -0.58345700 |
| H | 0.93364900  | -0.21443900 | 1.73721800  |
| H | 2.04038100  | -1.66920500 | 1.51312700  |
| H | 0.28878900  | -2.82175600 | 0.25131700  |
| H | -1.80425400 | -1.82790000 | -0.31882600 |
| H | -1.43699900 | 2.23223100  | 0.43679900  |
| H | 0.67938600  | 2.90392200  | 0.68524000  |

|   |             |             |             |
|---|-------------|-------------|-------------|
| H | 1.13875700  | -0.36694200 | -1.16382000 |
| N | 3.20636700  | -0.42365200 | -0.99243100 |
| H | 3.99407200  | -0.14710100 | -0.41904100 |
| H | 3.25617200  | -1.39328900 | -1.27530500 |
| H | 2.71610400  | 1.80376000  | 0.31497200  |
| C | -2.85282300 | 0.40050600  | -0.24221600 |
| H | -3.20434600 | 1.44625800  | -0.12194300 |
| O | -3.62768400 | -0.45332600 | -0.60811200 |

1-NH<sub>2</sub>-5-CN-substituted

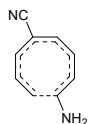

|   |             |             |             |
|---|-------------|-------------|-------------|
| C | -1.19530600 | 1.12004200  | 1.10848800  |
| C | -0.25633100 | 1.84920500  | 0.39480400  |
| C | 0.96906500  | 1.34536900  | -0.04606900 |
| C | 1.46509900  | 0.02881000  | 0.01149500  |
| C | 0.93185300  | -1.25236900 | 0.31053600  |
| C | -0.34236300 | -1.82256500 | 0.41323300  |
| C | -1.61642000 | -1.35490500 | 0.10359500  |
| C | -1.90734500 | -0.15578100 | -0.55883200 |
| H | -0.86144900 | 0.28680100  | 1.71229000  |
| H | -2.11523900 | 1.60317900  | 1.42961300  |
| H | -0.50952100 | 2.85905100  | 0.07519900  |
| H | 1.65615100  | 2.06741100  | -0.48024200 |
| H | 1.71993700  | -1.98712600 | 0.46120500  |
| H | -0.32274300 | -2.84028100 | 0.79772800  |
| H | -1.14483500 | 0.27469600  | -1.19590200 |
| N | -3.19980200 | 0.14721000  | -0.94459500 |
| H | -3.93914400 | -0.17318200 | -0.33116200 |
| H | -3.35658200 | 1.08656400  | -1.28418000 |
| H | -2.46158400 | -1.96210500 | 0.42756600  |
| C | 2.88626900  | -0.03510800 | -0.28648000 |
| N | 4.01807200  | -0.08309500 | -0.52922300 |

1-NH<sub>2</sub>-5-NO<sub>2</sub>-substituted

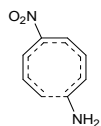

|   |             |             |             |
|---|-------------|-------------|-------------|
| C | -1.57169300 | 1.13768000  | 1.09462000  |
| C | -0.61464700 | 1.84678400  | 0.38375500  |
| C | 0.62409800  | 1.34354900  | -0.01682600 |
| C | 1.10152700  | 0.03351600  | 0.07270300  |
| C | 0.57786600  | -1.23711000 | 0.37194200  |
| C | -0.69999600 | -1.80013500 | 0.46118800  |
| C | -1.96972300 | -1.33913900 | 0.12403800  |
| C | -2.26008200 | -0.15602600 | -0.56712100 |
| H | -1.25583300 | 0.31955500  | 1.72794900  |
| H | -2.49629900 | 1.63305600  | 1.38179400  |
| H | -0.86560200 | 2.84443000  | 0.02660100  |
| H | 1.31965200  | 2.05288400  | -0.45001200 |
| H | 1.36369800  | -1.96319200 | 0.54933600  |
| H | -0.68966100 | -2.80768400 | 0.87137200  |

|   |             |             |             |
|---|-------------|-------------|-------------|
| H | -1.49433300 | 0.26865000  | -1.20359300 |
| N | -3.54922500 | 0.13229500  | -0.97129400 |
| H | -4.29495300 | -0.18280100 | -0.36295700 |
| H | -3.70875200 | 1.06208100  | -1.33488900 |
| H | -2.81735300 | -1.94184800 | 0.45047100  |
| N | 2.59093500  | -0.03488600 | -0.20355200 |
| O | 3.09792200  | -1.12790900 | -0.38567400 |
| O | 3.21749900  | 1.01019600  | -0.23656900 |

#### 1-OH-5-CH<sub>3</sub>-substituted

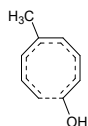

|   |             |             |             |
|---|-------------|-------------|-------------|
| C | -0.91878300 | 1.17854600  | 1.08147500  |
| C | 0.01894600  | 1.85243500  | 0.32502100  |
| C | 1.22467700  | 1.30936500  | -0.14968000 |
| C | 1.72812900  | 0.00614800  | -0.10141800 |
| C | 1.14658700  | -1.24106000 | 0.26026300  |
| C | -0.12630200 | -1.80067300 | 0.38608600  |
| C | -1.41211100 | -1.33306000 | 0.09577700  |
| C | -1.70898400 | -0.12659900 | -0.52697100 |
| H | -0.60438600 | 0.33551700  | 1.68316700  |
| H | -1.81942200 | 1.69611400  | 1.40210100  |
| H | -0.22558200 | 2.85559500  | -0.02262300 |
| H | 1.89065200  | 2.03282800  | -0.61687500 |
| H | 1.91812200  | -1.99462600 | 0.42677700  |
| H | -0.10918100 | -2.81707300 | 0.77591400  |
| H | -1.00896500 | 0.32265000  | -1.21736900 |
| O | -2.98552500 | 0.25110800  | -0.80337900 |
| H | -3.60604400 | -0.27412100 | -0.27492700 |
| H | -2.25071000 | -1.93299300 | 0.45284800  |
| C | 3.20378400  | -0.13114900 | -0.46146800 |
| H | 3.78158900  | -0.44245700 | 0.41713800  |
| H | 3.35804300  | -0.88693900 | -1.23844400 |
| H | 3.62443500  | 0.81293300  | -0.81517400 |

#### 1-OH-5-NH<sub>2</sub>-substituted

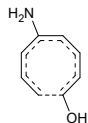

|   |             |             |             |
|---|-------------|-------------|-------------|
| C | -0.88139500 | 1.20354300  | 1.12235500  |
| C | 0.05395500  | 1.84898900  | 0.34115300  |
| C | 1.22648800  | 1.29268000  | -0.19125000 |
| C | 1.73687500  | -0.01092200 | -0.11913000 |
| C | 1.16245200  | -1.25223200 | 0.29041900  |
| C | -0.11311900 | -1.80150700 | 0.39039600  |
| C | -1.39721500 | -1.33432900 | 0.08687100  |
| C | -1.68753700 | -0.12354800 | -0.52689400 |
| H | -0.59082100 | 0.34232100  | 1.71004800  |
| H | -1.76646600 | 1.74209400  | 1.45003600  |
| H | -0.18502700 | 2.85334900  | -0.00784400 |
| H | 1.86899800  | 1.98361100  | -0.73496600 |

|   |             |             |             |
|---|-------------|-------------|-------------|
| H | 1.93348700  | -1.98939100 | 0.51579400  |
| H | -0.10370900 | -2.81051700 | 0.79945300  |
| H | -0.97507100 | 0.34696500  | -1.19057200 |
| O | -2.95881700 | 0.25672800  | -0.81039300 |
| H | -3.58443500 | -0.28728800 | -0.30742900 |
| H | -2.23736300 | -1.93552800 | 0.43652600  |
| N | 3.07427800  | -0.11790900 | -0.55110700 |
| H | 3.49536100  | -1.03158100 | -0.45057800 |
| H | 3.69261400  | 0.62145300  | -0.24310300 |

1-OH-5-OH-substituted

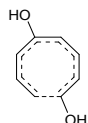

|   |             |             |             |
|---|-------------|-------------|-------------|
| C | -0.87604700 | 1.20452800  | 1.10117100  |
| C | 0.06021300  | 1.86325500  | 0.33221900  |
| C | 1.24955900  | 1.31389600  | -0.17071900 |
| C | 1.72546600  | 0.00542100  | -0.11713300 |
| C | 1.17610400  | -1.24515100 | 0.28031800  |
| C | -0.09319400 | -1.80534600 | 0.40190600  |
| C | -1.37802500 | -1.34017500 | 0.10354700  |
| C | -1.66583800 | -0.13436700 | -0.52355400 |
| H | -0.57385400 | 0.35517400  | 1.70023700  |
| H | -1.77200300 | 1.73076600  | 1.41915700  |
| H | -0.18050300 | 2.86604000  | -0.01861600 |
| H | 1.93363600  | 1.99510100  | -0.67031100 |
| H | 1.96514500  | -1.96626100 | 0.49980500  |
| H | -0.07396600 | -2.81204400 | 0.81539500  |
| H | -0.95288100 | 0.32144300  | -1.19721400 |
| O | -2.93513200 | 0.24611500  | -0.81310600 |
| H | -3.56410600 | -0.28331600 | -0.29886600 |
| H | -2.21774500 | -1.93707900 | 0.46092100  |
| O | 3.05570200  | -0.05633400 | -0.48839000 |
| H | 3.28228700  | -0.96042300 | -0.74507700 |

1-OH-5-F-substituted

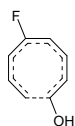

|   |             |             |             |
|---|-------------|-------------|-------------|
| C | -0.83564600 | 1.21999600  | 1.08608300  |
| C | 0.09691100  | 1.87166200  | 0.30828300  |
| C | 1.28835800  | 1.30048000  | -0.16812200 |
| C | 1.70010000  | -0.02172700 | -0.11789000 |
| C | 1.16687200  | -1.28379600 | 0.22034700  |
| C | -0.10549800 | -1.82481300 | 0.38268400  |
| C | -1.38782900 | -1.32572600 | 0.12875900  |
| C | -1.66589000 | -0.12683900 | -0.51335000 |
| H | -0.52734500 | 0.37647600  | 1.69077900  |
| H | -1.73242700 | 1.74513800  | 1.40298800  |
| H | -0.13417100 | 2.87252100  | -0.05271700 |
| H | 2.00885300  | 1.96139600  | -0.64280300 |
| H | 1.96983400  | -2.00721900 | 0.34482600  |
| H | -0.09227600 | -2.84083300 | 0.77168700  |

|   |             |             |             |
|---|-------------|-------------|-------------|
| H | -0.95613200 | 0.30592700  | -1.20518100 |
| O | -2.93121200 | 0.27928500  | -0.78312000 |
| H | -3.56369300 | -0.23010300 | -0.25305100 |
| H | -2.23123000 | -1.90162800 | 0.51153800  |
| F | 3.01822400  | -0.15237700 | -0.47376300 |

1-OH-5-CHO-substituted

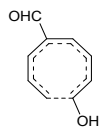

|   |             |             |             |
|---|-------------|-------------|-------------|
| C | 1.15694600  | -1.18172600 | 1.13885500  |
| C | 0.13212300  | -1.79967700 | 0.45268600  |
| C | -1.04877400 | -1.16307900 | 0.04379000  |
| C | -1.39933600 | 0.18805500  | 0.07259300  |
| C | -0.70816200 | 1.40629400  | 0.32664600  |
| C | 0.60951600  | 1.85075300  | 0.35708100  |
| C | 1.82802100  | 1.24083300  | 0.02063000  |
| C | 1.98386900  | 0.01532200  | -0.60601100 |
| H | 0.94877400  | -0.28601300 | 1.70954600  |
| H | 2.03675800  | -1.75154800 | 1.42616500  |
| H | 0.26630900  | -2.83293800 | 0.13672700  |
| H | -1.83663800 | -1.80612300 | -0.34459800 |
| H | -1.40559900 | 2.22724200  | 0.50013600  |
| H | 0.71396000  | 2.87952000  | 0.69614600  |
| H | 1.20098800  | -0.40747700 | -1.21892300 |
| O | 3.19719800  | -0.48933600 | -0.93687600 |
| H | 3.89897100  | -0.00085900 | -0.47895500 |
| H | 2.73718700  | 1.76632700  | 0.31762400  |
| C | -2.85470800 | 0.42864600  | -0.21514000 |
| H | -3.19191100 | 1.47546000  | -0.06723000 |
| O | -3.64291900 | -0.40767900 | -0.59105100 |

1-OH-5-CN-substituted

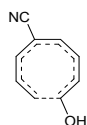

|   |             |             |             |
|---|-------------|-------------|-------------|
| C | -1.19676300 | 1.17974700  | 1.07118200  |
| C | -0.25060800 | 1.86995700  | 0.34045800  |
| C | 0.98364000  | 1.34378300  | -0.06430200 |
| C | 1.46464600  | 0.03015900  | 0.01800700  |
| C | 0.91268900  | -1.24586300 | 0.33667200  |
| C | -0.35900800 | -1.80551600 | 0.41887800  |
| C | -1.63550800 | -1.33380300 | 0.08772500  |
| C | -1.91986600 | -0.15183000 | -0.58201500 |
| H | -0.88576800 | 0.34730000  | 1.68893800  |
| H | -2.12481800 | 1.67256400  | 1.34870300  |
| H | -0.49721200 | 2.86529200  | -0.02441900 |
| H | 1.68351200  | 2.05383700  | -0.49819100 |
| H | 1.69418100  | -1.98002600 | 0.52114300  |
| H | -0.35333200 | -2.82192000 | 0.80670200  |
| H | -1.19573100 | 0.30206700  | -1.24361000 |
| O | -3.18172500 | 0.21789800  | -0.90594100 |
| H | -3.82540300 | -0.30614600 | -0.40401800 |



|   |             |             |             |
|---|-------------|-------------|-------------|
| H | -2.48345800 | -1.93050300 | 0.42719100  |
| C | 2.88609200  | -0.05831600 | -0.26971400 |
| N | 4.01856200  | -0.13079400 | -0.50232300 |

1-OH-5-NO<sub>2</sub>-substituted

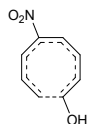

|   |             |             |             |
|---|-------------|-------------|-------------|
| C | -1.57052600 | 1.05642000  | 1.19209100  |
| C | -0.61660700 | 1.81820100  | 0.54733400  |
| C | 0.62580900  | 1.34426100  | 0.10420700  |
| C | 1.09379800  | 0.03529200  | 0.07669300  |
| C | 0.56840700  | -1.26207800 | 0.26528800  |
| C | -0.70145700 | -1.83235300 | 0.26009200  |
| C | -1.97545100 | -1.33892000 | -0.04671600 |
| C | -2.26362800 | -0.09923600 | -0.60116300 |
| H | -1.26587600 | 0.16799600  | 1.73018800  |
| H | -2.50392600 | 1.51770400  | 1.50402700  |
| H | -0.86377700 | 2.84337000  | 0.27872500  |
| H | 1.32555800  | 2.08399100  | -0.26859300 |
| H | 1.35720100  | -1.99180700 | 0.41398500  |
| H | -0.69601900 | -2.88111100 | 0.54854300  |
| H | -1.53628500 | 0.42713700  | -1.20252500 |
| O | -3.52453400 | 0.28936000  | -0.90371500 |
| H | -4.16965900 | -0.28822700 | -0.46642500 |
| H | -2.82291800 | -1.97256500 | 0.21892800  |
| N | 2.58247900  | -0.01292000 | -0.20103400 |
| O | 3.07250900  | 0.90225100  | -0.83741600 |
| O | 3.21906000  | -0.95980700 | 0.22406000  |

1-F-5-CH<sub>3</sub>-substituted

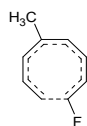

|   |             |             |             |
|---|-------------|-------------|-------------|
| C | -0.92768500 | 1.23376800  | 1.07709500  |
| C | 0.01522100  | 1.87502400  | 0.31048000  |
| C | 1.22270500  | 1.30831200  | -0.15121700 |
| C | 1.71456500  | 0.00731000  | -0.09736400 |
| C | 1.13038400  | -1.23949000 | 0.29196900  |
| C | -0.13309100 | -1.80342800 | 0.41028000  |
| C | -1.42588400 | -1.33863700 | 0.10287500  |
| C | -1.69662000 | -0.15824900 | -0.53960400 |
| H | -0.64189100 | 0.37752100  | 1.67416200  |
| H | -1.83328300 | 1.75541300  | 1.37545400  |
| H | -0.21251500 | 2.87516800  | -0.05637400 |
| H | 1.89835300  | 2.02338500  | -0.61765500 |
| H | 1.90647500  | -1.98107400 | 0.48900600  |
| H | -0.11777300 | -2.81415000 | 0.81361400  |
| H | -1.02776800 | 0.32043300  | -1.24105800 |
| F | -2.98723300 | 0.17070900  | -0.75451400 |
| H | -2.27926200 | -1.90455500 | 0.46983100  |
| C | 3.18318100  | -0.15057100 | -0.47525100 |
| H | 3.76703000  | -0.46917700 | 0.39671300  |

|   |            |             |             |
|---|------------|-------------|-------------|
| H | 3.31669200 | -0.91023600 | -1.25231200 |
| H | 3.61238700 | 0.78666700  | -0.83633800 |

1-F-5-NH<sub>2</sub>-substituted

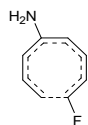

|   |             |             |             |
|---|-------------|-------------|-------------|
| C | -0.89255800 | 1.25667700  | 1.12055300  |
| C | 0.04822100  | 1.87101100  | 0.33032400  |
| C | 1.22028800  | 1.29184800  | -0.19346400 |
| C | 1.72158500  | -0.00943400 | -0.11650200 |
| C | 1.14684500  | -1.24891400 | 0.32414200  |
| C | -0.11863500 | -1.80409100 | 0.41842800  |
| C | -1.40902500 | -1.34168100 | 0.09246200  |
| C | -1.67136000 | -0.15545700 | -0.53912100 |
| H | -0.63036700 | 0.38305200  | 1.70313200  |
| H | -1.77921100 | 1.80235200  | 1.43067100  |
| H | -0.17337400 | 2.87397900  | -0.03342900 |
| H | 1.87036500  | 1.97517100  | -0.73816400 |
| H | 1.92259200  | -1.97009800 | 0.58288600  |
| H | -0.11114100 | -2.80496800 | 0.84603100  |
| H | -0.98721100 | 0.34555300  | -1.21022000 |
| F | -2.95697200 | 0.17401800  | -0.77071200 |
| H | -2.26457700 | -1.91008600 | 0.44865700  |
| N | 3.04946200  | -0.13837600 | -0.56506200 |
| H | 3.46481900  | -1.05443100 | -0.46581700 |
| H | 3.68245700  | 0.60219400  | -0.29282700 |

1-F-5-OH-substituted

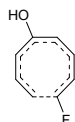

|   |             |             |             |
|---|-------------|-------------|-------------|
| C | -0.88485400 | 1.26018600  | 1.09847400  |
| C | 0.05616700  | 1.88603300  | 0.31849800  |
| C | 1.24541800  | 1.31192600  | -0.17410300 |
| C | 1.70959100  | 0.00538700  | -0.11599000 |
| C | 1.15949400  | -1.24355800 | 0.31217000  |
| C | -0.09988600 | -1.80847400 | 0.42886600  |
| C | -1.39154000 | -1.34634100 | 0.11062400  |
| C | -1.65098300 | -0.16680000 | -0.53587200 |
| H | -0.61095000 | 0.39740200  | 1.69184600  |
| H | -1.78331800 | 1.79254300  | 1.39773600  |
| H | -0.16709000 | 2.88651100  | -0.04963100 |
| H | 1.93894500  | 1.98359700  | -0.67403400 |
| H | 1.95369100  | -1.94890300 | 0.56240100  |
| H | -0.08289500 | -2.80773100 | 0.85917100  |
| H | -0.96626200 | 0.31843900  | -1.21821900 |
| F | -2.93453100 | 0.16641900  | -0.76833600 |
| H | -2.24677200 | -1.90871500 | 0.47687900  |
| O | 3.03381400  | -0.07724600 | -0.50256900 |
| H | 3.24448300  | -0.98309400 | -0.76657300 |

1-F-5-F-substituted

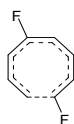

|   |             |             |             |
|---|-------------|-------------|-------------|
| C | -0.84111000 | 1.28084400  | 1.07855500  |
| C | 0.09679400  | 1.89485500  | 0.28825200  |
| C | 1.28966600  | 1.29631400  | -0.17029200 |
| C | 1.68714500  | -0.02363000 | -0.11518800 |
| C | 1.14932900  | -1.28676400 | 0.24667300  |
| C | -0.11448000 | -1.82929400 | 0.40317800  |
| C | -1.40493400 | -1.32902400 | 0.13725700  |
| C | -1.65740600 | -0.15871500 | -0.52564000 |
| H | -0.56285900 | 0.42460600  | 1.67994200  |
| H | -1.74165300 | 1.81241800  | 1.37255200  |
| H | -0.11509400 | 2.89143400  | -0.09529200 |
| H | 2.02367300  | 1.94649800  | -0.63960400 |
| H | 1.95585400  | -2.00186300 | 0.39552400  |
| H | -0.10373600 | -2.84161400 | 0.80084700  |
| H | -0.97968800 | 0.30126000  | -1.23199100 |
| F | -2.93733400 | 0.20431600  | -0.72626800 |
| H | -2.26194600 | -1.86803000 | 0.53395300  |
| F | 2.99904700  | -0.17456300 | -0.48180900 |

1-F-5-CHO-substituted

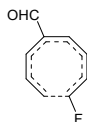

|   |             |             |             |
|---|-------------|-------------|-------------|
| C | 1.15630200  | -1.25011200 | 1.13646300  |
| C | 0.12564600  | -1.82902700 | 0.43885400  |
| C | -1.05126300 | -1.16104300 | 0.04574700  |
| C | -1.38581700 | 0.18803700  | 0.08405600  |
| C | -0.68709900 | 1.40407800  | 0.36536700  |
| C | 0.62283800  | 1.84990900  | 0.38691500  |
| C | 1.84527600  | 1.24035800  | 0.02634400  |
| C | 1.97255100  | 0.04519400  | -0.62336400 |
| H | 0.98331500  | -0.34008400 | 1.69631300  |
| H | 2.03529600  | -1.83025000 | 1.40421100  |
| H | 0.23528100  | -2.85911300 | 0.10422400  |
| H | -1.85147600 | -1.78996100 | -0.34173100 |
| H | -1.38526800 | 2.21705400  | 0.57125800  |
| H | 0.73226500  | 2.87324300  | 0.73935500  |
| H | 1.21570500  | -0.40858200 | -1.24690900 |
| F | 3.20875900  | -0.40492900 | -0.90462300 |
| H | 2.76916200  | 1.72949700  | 0.32777700  |
| C | -2.83823700 | 0.44471000  | -0.21418400 |
| H | -3.17136100 | 1.48925700  | -0.04511500 |
| O | -3.62536500 | -0.37866700 | -0.61812000 |

1-F-5-CN-substituted

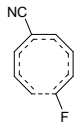

|   |             |             |             |
|---|-------------|-------------|-------------|
| C | -1.20699100 | 1.24209300  | 1.06472100  |
| C | -0.25582500 | 1.89742400  | 0.32231600  |
| C | 0.98154900  | 1.34671400  | -0.06491500 |
| C | 1.45151400  | 0.03662400  | 0.02633700  |
| C | 0.89708500  | -1.24037700 | 0.37524100  |
| C | -0.36356100 | -1.80640500 | 0.44849700  |
| C | -1.64788600 | -1.34140200 | 0.09544600  |
| C | -1.90472300 | -0.19113900 | -0.59891900 |
| H | -0.92459200 | 0.39439900  | 1.67547000  |
| H | -2.14103100 | 1.73673400  | 1.31714000  |
| H | -0.48434200 | 2.88865200  | -0.06451500 |
| H | 1.69123800  | 2.04819000  | -0.49733200 |
| H | 1.68321900  | -1.96057700 | 0.59340500  |
| H | -0.35850500 | -2.81705700 | 0.85029200  |
| H | -1.21046700 | 0.29213400  | -1.27187100 |
| F | -3.18341300 | 0.12800200  | -0.86356500 |
| H | -2.51126300 | -1.90424800 | 0.44344600  |
| C | 2.86896900  | -0.06733000 | -0.27571600 |
| N | 3.99795300  | -0.15535300 | -0.51885700 |

#### 1-F-5-NO<sub>2</sub>-substituted

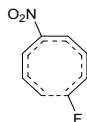

|   |             |             |             |
|---|-------------|-------------|-------------|
| C | 1.57736000  | -1.12430100 | 1.19093700  |
| C | 0.61726900  | -1.84850600 | 0.52869500  |
| C | -0.62819900 | -1.34614100 | 0.10229700  |
| C | -1.08435000 | -0.04009900 | 0.08410600  |
| C | -0.55530700 | 1.26042500  | 0.30066300  |
| C | 0.70424100  | 1.83411900  | 0.28691600  |
| C | 1.98622900  | 1.34525800  | -0.04044700 |
| C | 2.25251800  | 0.13554700  | -0.62137200 |
| H | 1.30487700  | -0.22071200 | 1.72087400  |
| H | 2.51459100  | -1.59393600 | 1.47738100  |
| H | 0.84454900  | -2.87186700 | 0.23710900  |
| H | -1.34001700 | -2.07613300 | -0.26816400 |
| H | -1.34642400 | 1.98079300  | 0.48103200  |
| H | 0.70053600  | 2.87892600  | 0.58835500  |
| H | 1.56237300  | -0.42525800 | -1.23536900 |
| F | 3.53377400  | -0.19055600 | -0.86295200 |
| H | 2.84809500  | 1.94799300  | 0.23744200  |
| N | -2.57127800 | 0.02023400  | -0.20526600 |
| O | -3.20535500 | 0.95948200  | 0.23868800  |
| O | -3.05866600 | -0.87751300 | -0.86693800 |

#### 1-CHO-5-CH<sub>3</sub>-substituted

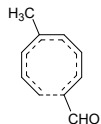

|   |             |             |             |
|---|-------------|-------------|-------------|
| C | -0.60104300 | 1.28956300  | 1.06496400  |
| C | 0.37871500  | 1.90122800  | 0.31791400  |
| C | 1.57407200  | 1.30368500  | -0.12963000 |
| C | 2.04718100  | -0.00905200 | -0.10733400 |
| C | 1.45967400  | -1.26361100 | 0.24031000  |
| C | 0.19793800  | -1.83671400 | 0.38580200  |
| C | -1.08991500 | -1.34527400 | 0.12451700  |
| C | -1.35668200 | -0.15954000 | -0.53019300 |
| H | -0.36597100 | 0.40907600  | 1.64816600  |
| H | -1.48152600 | 1.84792100  | 1.37239700  |
| H | 0.20095600  | 2.91883900  | -0.02716000 |
| H | 2.27430000  | 2.01312000  | -0.56761900 |
| H | 2.23939300  | -2.01133200 | 0.39807500  |
| H | 0.22884000  | -2.85306400 | 0.77483400  |
| H | -0.61366100 | 0.25893600  | -1.19803700 |
| C | -2.75259300 | 0.29950100  | -0.70947100 |
| H | -2.89556000 | 1.13159700  | -1.42723200 |
| O | -3.70258100 | -0.15822100 | -0.11009200 |
| H | -1.93840000 | -1.89619400 | 0.52809300  |
| C | 3.51990800  | -0.16581600 | -0.47779800 |
| H | 4.09790300  | -0.49485000 | 0.39406500  |
| H | 3.65701000  | -0.91593800 | -1.26307300 |
| H | 3.95383700  | 0.77383600  | -0.82626300 |

1-CHO-5-NH<sub>2</sub>-substituted

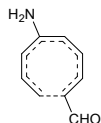

|   |             |             |             |
|---|-------------|-------------|-------------|
| C | -0.56173000 | 1.31670800  | 1.10464300  |
| C | 0.41688500  | 1.89806200  | 0.33382900  |
| C | 1.57960000  | 1.28662200  | -0.16940100 |
| C | 2.05622200  | -0.02825500 | -0.12636600 |
| C | 1.47375800  | -1.27621500 | 0.27334900  |
| C | 0.20951800  | -1.83760600 | 0.39568100  |
| C | -1.07892700 | -1.34743300 | 0.11797400  |
| C | -1.33941800 | -0.15998300 | -0.52824900 |
| H | -0.35436900 | 0.41946500  | 1.67268700  |
| H | -1.42358800 | 1.89869100  | 1.41929500  |
| H | 0.24874400  | 2.91749600  | -0.01150600 |
| H | 2.26021300  | 1.96558700  | -0.68182000 |
| H | 2.25265300  | -2.00831100 | 0.49029700  |
| H | 0.23246900  | -2.84582000 | 0.80603800  |
| H | -0.58587100 | 0.27941300  | -1.17051900 |
| C | -2.73105100 | 0.31256000  | -0.70403000 |
| H | -2.86204400 | 1.17069200  | -1.39270200 |
| O | -3.68987700 | -0.16108600 | -0.13147800 |
| H | -1.92820600 | -1.89939400 | 0.51724200  |
| N | 3.38718800  | -0.15519300 | -0.57378800 |
| H | 3.79399000  | -1.07735800 | -0.49711600 |
| H | 4.02557300  | 0.56781900  | -0.26813400 |

## 1-CHO-5-OH-substituted

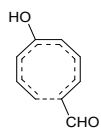

|   |             |             |             |
|---|-------------|-------------|-------------|
| C | -0.55353400 | 1.32637400  | 1.08502800  |
| C | 0.42738600  | 1.91405000  | 0.32308200  |
| C | 1.60403400  | 1.30291200  | -0.15007500 |
| C | 2.04212300  | -0.01700000 | -0.12639600 |
| C | 1.48378900  | -1.27251200 | 0.26323800  |
| C | 0.22542100  | -1.84084200 | 0.40968300  |
| C | -1.06278900 | -1.34840700 | 0.13741700  |
| C | -1.32058200 | -0.16849300 | -0.52444500 |
| H | -0.33843100 | 0.43826600  | 1.66447600  |
| H | -1.42461700 | 1.90039800  | 1.38895200  |
| H | 0.26147400  | 2.93210400  | -0.02598400 |
| H | 2.32863900  | 1.96556800  | -0.61747800 |
| H | 2.27996500  | -1.99023800 | 0.47050400  |
| H | 0.25530400  | -2.84693900 | 0.82390900  |
| H | -0.56719100 | 0.25875600  | -1.17545700 |
| C | -2.71284000 | 0.30143100  | -0.70952400 |
| H | -2.84444100 | 1.14540300  | -1.41500100 |
| O | -3.66990400 | -0.16248900 | -0.12715000 |
| H | -1.91274600 | -1.89328900 | 0.54477900  |
| O | 3.36847400  | -0.09971300 | -0.51080600 |
| H | 3.57543200  | -0.99748600 | -0.80310800 |

## 1-CHO-5-F-substituted

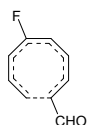

|   |             |             |             |
|---|-------------|-------------|-------------|
| C | -0.53396000 | 1.34434800  | 1.05424700  |
| C | 0.44512300  | 1.92249300  | 0.28609500  |
| C | 1.63166000  | 1.29376900  | -0.14399400 |
| C | 2.01620800  | -0.03348400 | -0.11802500 |
| C | 1.48242600  | -1.30882100 | 0.19967100  |
| C | 0.22597900  | -1.86840800 | 0.37738200  |
| C | -1.06097000 | -1.34778200 | 0.14968300  |
| C | -1.31823400 | -0.17774800 | -0.52800600 |
| H | -0.31495000 | 0.46614600  | 1.64774200  |
| H | -1.41198200 | 1.91481400  | 1.34426200  |
| H | 0.28627200  | 2.93383400  | -0.08355000 |
| H | 2.39230400  | 1.93858100  | -0.57777900 |
| H | 2.29768000  | -2.02161600 | 0.31165200  |
| H | 0.25499700  | -2.88722200 | 0.75821100  |
| H | -0.57252200 | 0.22943900  | -1.20080800 |
| C | -2.70914000 | 0.30498300  | -0.69387500 |
| H | -2.84825900 | 1.12744800  | -1.42262000 |
| O | -3.65594000 | -0.12959900 | -0.07402000 |
| H | -1.90985300 | -1.87548600 | 0.58167600  |
| F | 3.33325300  | -0.17391600 | -0.47396600 |

## 1-CHO-5-CHO-substituted

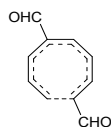

|   |             |             |             |
|---|-------------|-------------|-------------|
| C | 0.83927100  | -1.27304500 | 1.15915100  |
| C | -0.19810600 | -1.83716400 | 0.46094000  |
| C | -1.36865700 | -1.16271000 | 0.06016700  |
| C | -1.71779400 | 0.18523600  | 0.06408000  |
| C | -1.05305900 | 1.42389200  | 0.32382900  |
| C | 0.24326300  | 1.91222900  | 0.38476000  |
| C | 1.48059300  | 1.30888800  | 0.08069400  |
| C | 1.64240900  | 0.11421800  | -0.57998800 |
| H | 0.69516200  | -0.34339300 | 1.69380800  |
| H | 1.70283800  | -1.86749900 | 1.44551900  |
| H | -0.11012500 | -2.87580200 | 0.14758300  |
| H | -2.16922200 | -1.79956400 | -0.31459000 |
| H | -1.78037600 | 2.22073300  | 0.49066300  |
| H | 0.30883500  | 2.94260600  | 0.72869000  |
| H | 0.83644800  | -0.29144400 | -1.17885200 |
| C | 2.99876300  | -0.43587400 | -0.80820100 |
| H | 3.06376800  | -1.27550200 | -1.52714200 |
| O | 3.99485100  | -0.03456600 | -0.24516900 |
| H | 2.38412700  | 1.80422000  | 0.43479500  |
| C | -3.17448900 | 0.40608200  | -0.25464200 |
| H | -3.53128500 | 1.44619900  | -0.11051800 |
| O | -3.93901800 | -0.44181800 | -0.64916700 |

#### 1-CHO-5-CN-substituted

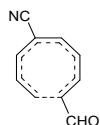

|   |             |             |             |
|---|-------------|-------------|-------------|
| C | -0.86520800 | 1.31301200  | 1.07497400  |
| C | 0.11562500  | 1.93063000  | 0.33957000  |
| C | 1.33540300  | 1.34164700  | -0.04622100 |
| C | 1.78447700  | 0.02026100  | 0.01239900  |
| C | 1.22928400  | -1.26365200 | 0.33351300  |
| C | -0.02926300 | -1.83460600 | 0.43934300  |
| C | -1.31200900 | -1.33792900 | 0.13637700  |
| C | -1.56864000 | -0.18511800 | -0.56922700 |
| H | -0.63303600 | 0.43590100  | 1.66462500  |
| H | -1.77194700 | 1.84863100  | 1.34301400  |
| H | -0.06384300 | 2.93915300  | -0.02737600 |
| H | 2.06571900  | 2.03392200  | -0.45942600 |
| H | 2.02130800  | -1.98813200 | 0.51554500  |
| H | -0.01075700 | -2.84997400 | 0.82973300  |
| H | -0.80751000 | 0.23693600  | -1.21423100 |
| C | -2.96734400 | 0.25359900  | -0.79818500 |
| H | -3.10776300 | 1.03962500  | -1.56486100 |
| O | -3.91778200 | -0.18284500 | -0.18642800 |
| H | -2.17042400 | -1.87882800 | 0.53313900  |
| C | 3.19994500  | -0.08819800 | -0.30016200 |
| N | 4.32669800  | -0.17890700 | -0.55186000 |

#### 1-CHO-5-NO<sub>2</sub>-substituted

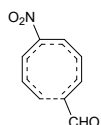

|   |             |             |             |
|---|-------------|-------------|-------------|
| C | 1.24906800  | -1.20723800 | 1.21185000  |
| C | 0.25784000  | -1.88975200 | 0.55196000  |
| C | -0.96860100 | -1.34472800 | 0.12381700  |
| C | -1.40158500 | -0.02980600 | 0.07681300  |
| C | -0.87356800 | 1.27325200  | 0.27721200  |
| C | 0.38447700  | 1.85535300  | 0.30138300  |
| C | 1.66485500  | 1.34093300  | 0.02006500  |
| C | 1.92315700  | 0.13016300  | -0.58068100 |
| H | 1.02938200  | -0.27888700 | 1.72249200  |
| H | 2.15963000  | -1.71847800 | 1.51305400  |
| H | 0.43491800  | -2.92784800 | 0.27892400  |
| H | -1.70128800 | -2.06097800 | -0.23363400 |
| H | -1.67272100 | 1.99309300  | 0.42509100  |
| H | 0.36728800  | 2.90136700  | 0.59946800  |
| H | 1.15705500  | -0.35946800 | -1.16925800 |
| C | 3.32385700  | -0.31169900 | -0.79247800 |
| H | 3.46265900  | -1.16362600 | -1.48558100 |
| O | 4.27739400  | 0.19180300  | -0.24001200 |
| H | 2.52501700  | 1.92424900  | 0.34658600  |
| N | -2.88749600 | 0.03831600  | -0.23261600 |
| O | -3.36728900 | -0.85293600 | -0.90787000 |
| O | -3.52341400 | 0.97657200  | 0.20932300  |

#### 1-CN-5-CH<sub>3</sub>-substituted

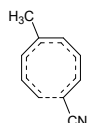

|   |             |             |             |
|---|-------------|-------------|-------------|
| C | 0.68844900  | -1.13839700 | 1.19509000  |
| C | -0.18189200 | -1.85003300 | 0.40083900  |
| C | -1.38762900 | -1.36026400 | -0.13694100 |
| C | -1.95926400 | -0.08707600 | -0.16293100 |
| C | -1.48546000 | 1.20881400  | 0.20344200  |
| C | -0.27877500 | 1.87430500  | 0.40840800  |
| C | 1.05576000  | 1.48657600  | 0.21894600  |
| C | 1.43712400  | 0.30060600  | -0.38459000 |
| H | 0.33009200  | -0.27910700 | 1.74762200  |
| H | 1.59710700  | -1.60661300 | 1.56375600  |
| H | 0.10907400  | -2.85117200 | 0.08725900  |
| H | -1.99763900 | -2.12640600 | -0.61246400 |
| H | -2.32387800 | 1.90027000  | 0.30647700  |
| H | -0.40258100 | 2.89015200  | 0.77845500  |
| H | 0.76293700  | -0.17927900 | -1.08237900 |
| C | 2.82932800  | -0.01560400 | -0.54782300 |
| N | 3.94847700  | -0.29447800 | -0.66041300 |
| H | 1.82884300  | 2.12403300  | 0.64194700  |
| C | -3.41254500 | -0.04206900 | -0.62672500 |
| H | -4.06422500 | 0.26635300  | 0.19941500  |
| H | -3.55030200 | 0.67908200  | -1.43856400 |
| H | -3.75934100 | -1.01712400 | -0.97491600 |

#### 1-CN-5-NH<sub>2</sub>-substituted



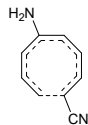

|   |             |             |             |
|---|-------------|-------------|-------------|
| C | 0.66527200  | -1.13575800 | 1.22199300  |
| C | -0.20514300 | -1.84421800 | 0.42323800  |
| C | -1.38462200 | -1.35664200 | -0.16329600 |
| C | -1.96616700 | -0.08285400 | -0.17540900 |
| C | -1.50722500 | 1.21163000  | 0.23447000  |
| C | -0.30158100 | 1.87955000  | 0.40447300  |
| C | 1.03485000  | 1.49888900  | 0.19998800  |
| C | 1.41018300  | 0.29929300  | -0.37780600 |
| H | 0.31504300  | -0.26825400 | 1.76689400  |
| H | 1.56584000  | -1.61302500 | 1.59759000  |
| H | 0.08731400  | -2.84738400 | 0.11696300  |
| H | -1.97113500 | -2.11215600 | -0.68483000 |
| H | -2.36173100 | 1.86683800  | 0.40415600  |
| H | -0.42551300 | 2.89055600  | 0.78746000  |
| H | 0.72973200  | -0.19668300 | -1.05894300 |
| C | 2.80117300  | -0.01990200 | -0.54786000 |
| N | 3.91911500  | -0.30012800 | -0.66860200 |
| H | 1.80801800  | 2.14445100  | 0.60888000  |
| N | -3.31486600 | -0.03977400 | -0.58161700 |
| H | -3.56240100 | 0.73065500  | -1.18981500 |
| H | -3.69535000 | -0.91561500 | -0.91556500 |

1-CN-5-OH-substituted

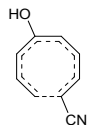

|   |             |             |             |
|---|-------------|-------------|-------------|
| C | 0.64559300  | -1.17378500 | 1.21666900  |
| C | -0.21986500 | -1.86680200 | 0.40390100  |
| C | -1.40764400 | -1.37015600 | -0.16332500 |
| C | -1.95327800 | -0.09070300 | -0.18880600 |
| C | -1.52043900 | 1.20680800  | 0.22129700  |
| C | -0.32130600 | 1.87381600  | 0.43053800  |
| C | 1.01711800  | 1.49259100  | 0.23349500  |
| C | 1.39941600  | 0.31498200  | -0.37843100 |
| H | 0.30060800  | -0.30720200 | 1.76611400  |
| H | 1.54912300  | -1.65262400 | 1.58313400  |
| H | 0.06768500  | -2.86740500 | 0.08600700  |
| H | -2.03667400 | -2.09630200 | -0.67257300 |
| H | -2.38040300 | 1.86162000  | 0.37374600  |
| H | -0.45111900 | 2.87861300  | 0.82681600  |
| H | 0.71962300  | -0.17966000 | -1.06102000 |
| C | 2.79111300  | 0.00115300  | -0.54609500 |
| N | 3.91065100  | -0.27292400 | -0.66542200 |
| H | 1.78688300  | 2.12945000  | 0.66214900  |
| O | -3.25061100 | -0.11761100 | -0.66256500 |
| H | -3.50963600 | 0.75744200  | -0.98135200 |

1-CN-5-F-substituted

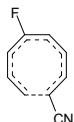

|   |             |             |             |
|---|-------------|-------------|-------------|
| C | 0.62601200  | -1.18968500 | 1.18572000  |
| C | -0.23577800 | -1.87767200 | 0.36678600  |
| C | -1.43705500 | -1.36617500 | -0.16122000 |
| C | -1.92984100 | -0.07411000 | -0.18081100 |
| C | -1.51842800 | 1.23956200  | 0.15797100  |
| C | -0.32268900 | 1.89876000  | 0.40256100  |
| C | 1.01428400  | 1.49191500  | 0.25052400  |
| C | 1.39561900  | 0.32269200  | -0.37701100 |
| H | 0.27233600  | -0.33480600 | 1.74849900  |
| H | 1.53656100  | -1.66258400 | 1.54227700  |
| H | 0.04820300  | -2.87287200 | 0.03089000  |
| H | -2.10441300 | -2.07748200 | -0.64193400 |
| H | -2.39147300 | 1.88780000  | 0.20940900  |
| H | -0.45266700 | 2.91511400  | 0.76720700  |
| H | 0.72309400  | -0.14970700 | -1.08235200 |
| C | 2.78602600  | -0.00797200 | -0.52132600 |
| N | 3.90378400  | -0.29639600 | -0.62068400 |
| H | 1.78356800  | 2.11229900  | 0.70411400  |
| F | -3.22340000 | -0.04076400 | -0.63027700 |

#### 1-CN-5-CHO-substituted

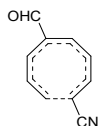

|   |             |             |             |
|---|-------------|-------------|-------------|
| C | 0.93490200  | -1.08719600 | 1.29871500  |
| C | -0.02685400 | -1.75836400 | 0.58236200  |
| C | -1.21590000 | -1.18353200 | 0.09841500  |
| C | -1.64482800 | 0.14116500  | 0.03382400  |
| C | -1.06240000 | 1.42250100  | 0.27160100  |
| C | 0.20174000  | 1.98718000  | 0.36825000  |
| C | 1.48480500  | 1.45591300  | 0.13541200  |
| C | 1.73301700  | 0.23154500  | -0.44893000 |
| H | 0.68870900  | -0.15994300 | 1.80029000  |
| H | 1.82671500  | -1.60532800 | 1.64109000  |
| H | 0.15365400  | -2.79808100 | 0.31688200  |
| H | -1.95402100 | -1.88308400 | -0.29141200 |
| H | -1.83763300 | 2.18435400  | 0.37225300  |
| H | 0.19513600  | 3.03205700  | 0.67065500  |
| H | 0.97632100  | -0.23981900 | -1.06203200 |
| C | 3.08023100  | -0.21790900 | -0.65980400 |
| N | 4.16240000  | -0.60311200 | -0.81140900 |
| H | 2.33470900  | 2.03678000  | 0.48763600  |
| C | -3.09599900 | 0.26376900  | -0.35649900 |
| H | -3.51584800 | 1.28717500  | -0.27864800 |
| O | -3.79210300 | -0.64534400 | -0.73961500 |

#### 1-CN-5-CN-substituted

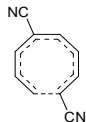

|   |             |             |             |
|---|-------------|-------------|-------------|
| C | 0.95311100  | -1.14861600 | 1.20892500  |
| C | 0.05851600  | -1.85842600 | 0.44320300  |
| C | -1.17200700 | -1.36240600 | -0.02244200 |
| C | -1.70178600 | -0.06832600 | -0.01485100 |
| C | -1.23496000 | 1.24877500  | 0.30252800  |
| C | -0.01629000 | 1.89421400  | 0.45463600  |
| C | 1.30655300  | 1.47838100  | 0.21801100  |
| C | 1.65396300  | 0.30954600  | -0.42908800 |
| H | 0.61807400  | -0.28658600 | 1.77170200  |
| H | 1.88317600  | -1.60837800 | 1.53181200  |
| H | 0.33164400  | -2.85824800 | 0.11304400  |
| H | -1.83394100 | -2.10593600 | -0.46088400 |
| H | -2.07251300 | 1.93284500  | 0.42775800  |
| H | -0.11025900 | 2.91437600  | 0.81958300  |
| H | 0.94758200  | -0.16791300 | -1.09586400 |
| C | 3.03502800  | -0.02466600 | -0.64138400 |
| N | 4.14483300  | -0.31864600 | -0.79579400 |
| H | 2.10334100  | 2.09823500  | 0.62323200  |
| C | -3.10427600 | -0.04870700 | -0.39545700 |
| N | -4.22115000 | -0.02949900 | -0.70061500 |

#### 1-CN-5-NO<sub>2</sub>-substituted

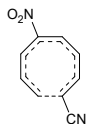

|   |             |             |             |
|---|-------------|-------------|-------------|
| C | 1.33278900  | -1.01290200 | 1.33711500  |
| C | 0.42110100  | -1.79009000 | 0.66257300  |
| C | -0.81602200 | -1.33883800 | 0.16897100  |
| C | -1.32096900 | -0.05082200 | 0.07121900  |
| C | -0.87113600 | 1.28141400  | 0.25311700  |
| C | 0.35200400  | 1.93489200  | 0.30790400  |
| C | 1.66891400  | 1.49599400  | 0.08251100  |
| C | 2.00571400  | 0.26930500  | -0.45405800 |
| H | 1.01098700  | -0.09731300 | 1.81739000  |
| H | 2.26663700  | -1.44362300 | 1.68772500  |
| H | 0.68345900  | -2.81891600 | 0.42689600  |
| H | -1.48926700 | -2.10552600 | -0.20035400 |
| H | -1.71277100 | 1.96107900  | 0.34641300  |
| H | 0.26656300  | 2.98569900  | 0.57420600  |
| H | 1.28745400  | -0.27322800 | -1.05475500 |
| C | 3.38287800  | -0.08316900 | -0.66096700 |
| N | 4.49011400  | -0.39049200 | -0.80744200 |
| H | 2.47367500  | 2.15250800  | 0.40615600  |
| N | -2.79615800 | -0.07334700 | -0.29401400 |
| O | -3.20225700 | -1.01716500 | -0.94488000 |
| O | -3.49475100 | 0.84860100  | 0.08190500  |

#### 1-NO<sub>2</sub>-5-CH<sub>3</sub>-substituted

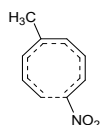

|   |             |             |             |
|---|-------------|-------------|-------------|
| C | 0.32344400  | -1.01095000 | 1.38138000  |
| C | -0.52508800 | -1.78660800 | 0.63261500  |
| C | -1.72065000 | -1.34612100 | 0.02283500  |
| C | -2.28603200 | -0.08484800 | -0.14601500 |
| C | -1.81652600 | 1.24510300  | 0.10159300  |
| C | -0.61455600 | 1.92682600  | 0.24719900  |
| C | 0.72373800  | 1.51251400  | 0.12472500  |
| C | 1.09111800  | 0.27820700  | -0.34249200 |
| H | -0.03557100 | -0.09360200 | 1.83141900  |
| H | 1.22878800  | -1.43836900 | 1.80524500  |
| H | -0.22864700 | -2.81049000 | 0.41232100  |
| H | -2.32298000 | -2.15517400 | -0.38688400 |
| H | -2.65725500 | 1.94063700  | 0.13020300  |
| H | -0.73736900 | 2.97699700  | 0.50303700  |
| H | 0.50689600  | -0.30990100 | -1.03244600 |
| N | 2.50629100  | -0.06615400 | -0.40474300 |
| O | 2.80436700  | -0.99869900 | -1.13496800 |
| O | 3.29324200  | 0.55980800  | 0.28750000  |
| H | 1.50771800  | 2.16614400  | 0.49845700  |
| C | -3.72394400 | -0.08141500 | -0.65605600 |
| H | -4.39506900 | 0.33807600  | 0.10260700  |
| H | -3.82492000 | 0.53222800  | -1.55709700 |
| H | -4.07552600 | -1.08858600 | -0.88861400 |

1-NO<sub>2</sub>-5-NH<sub>2</sub>-substituted

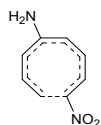

|   |             |             |             |
|---|-------------|-------------|-------------|
| C | 0.29932700  | -1.00677700 | 1.41223800  |
| C | -0.54646000 | -1.77817700 | 0.65410500  |
| C | -1.71232000 | -1.34423300 | -0.00724400 |
| C | -2.28779300 | -0.08082200 | -0.16335600 |
| C | -1.83507700 | 1.25233100  | 0.12867700  |
| C | -0.63404500 | 1.93196400  | 0.24438700  |
| C | 0.70681200  | 1.52180700  | 0.10905400  |
| C | 1.06687100  | 0.27819000  | -0.33435000 |
| H | -0.05174400 | -0.08170200 | 1.85261900  |
| H | 1.19455500  | -1.44368700 | 1.84655400  |
| H | -0.24781500 | -2.80331000 | 0.44175500  |
| H | -2.28785500 | -2.14674400 | -0.46716500 |
| H | -2.69260300 | 1.91877000  | 0.22067400  |
| H | -0.75707200 | 2.97831700  | 0.51537900  |
| H | 0.47339100  | -0.32421500 | -1.00444800 |
| N | 2.48134200  | -0.07017800 | -0.40530300 |
| O | 2.77102300  | -1.01057300 | -1.12908500 |
| O | 3.27609100  | 0.56220100  | 0.27140500  |
| H | 1.49104400  | 2.17963900  | 0.47333500  |
| N | -3.62302500 | -0.07179000 | -0.61100000 |
| H | -3.84802500 | 0.63306700  | -1.30202000 |
| H | -4.00290300 | -0.97508900 | -0.86217800 |

1-NO<sub>2</sub>-5-OH-substituted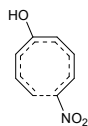

|   |             |             |             |
|---|-------------|-------------|-------------|
| C | 0.27828700  | -1.04944500 | 1.40966500  |
| C | -0.56292000 | -1.80449400 | 0.63493700  |
| C | -1.73692400 | -1.35711800 | -0.00780100 |
| C | -2.27328900 | -0.08845200 | -0.17722300 |
| C | -1.84504600 | 1.24665300  | 0.11616800  |
| C | -0.65026800 | 1.92760700  | 0.27222200  |
| C | 0.69187300  | 1.51554200  | 0.14451700  |
| C | 1.05801900  | 0.28997200  | -0.33560300 |
| H | -0.06682200 | -0.12509400 | 1.85617200  |
| H | 1.17464000  | -1.49134600 | 1.83659300  |
| H | -0.27082400 | -2.82845500 | 0.40988400  |
| H | -2.35712000 | -2.12825400 | -0.45864100 |
| H | -2.70718200 | 1.91172900  | 0.19213200  |
| H | -0.77786600 | 2.96918800  | 0.55799000  |
| H | 0.46557200  | -0.30869900 | -1.00992600 |
| N | 2.47327100  | -0.05545000 | -0.40446300 |
| O | 2.76661500  | -0.98492100 | -1.13973300 |
| O | 3.26336000  | 0.57050400  | 0.28346000  |
| H | 1.47330700  | 2.16513400  | 0.52923500  |
| O | -3.55580700 | -0.15348500 | -0.68433700 |
| H | -3.79833700 | 0.68557600  | -1.09861800 |

1-NO<sub>2</sub>-5-F-substituted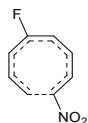

|   |             |             |             |
|---|-------------|-------------|-------------|
| C | 0.26819900  | -1.07672500 | 1.36274900  |
| C | -0.57253100 | -1.82228400 | 0.58074600  |
| C | -1.76625800 | -1.35354800 | -0.01235200 |
| C | -2.25215900 | -0.07200700 | -0.16673600 |
| C | -1.84270400 | 1.27251000  | 0.05243700  |
| C | -0.65185800 | 1.94999500  | 0.24122700  |
| C | 0.68835000  | 1.51906400  | 0.15949400  |
| C | 1.05621800  | 0.30349700  | -0.34295700 |
| H | -0.08470900 | -0.16726500 | 1.83393800  |
| H | 1.17538100  | -1.51504600 | 1.77017400  |
| H | -0.28316600 | -2.83975800 | 0.32681700  |
| H | -2.42935700 | -2.10506300 | -0.43430200 |
| H | -2.71659000 | 1.92126400  | 0.03594000  |
| H | -0.77983400 | 2.99942900  | 0.49506200  |
| H | 0.47520200  | -0.27272900 | -1.04647900 |
| N | 2.46923300  | -0.05662200 | -0.38262600 |
| O | 2.76928000  | -0.97987300 | -1.12247100 |
| O | 3.24816200  | 0.55154400  | 0.33306400  |
| H | 1.46697000  | 2.15406800  | 0.57403700  |
| F | -3.53462200 | -0.07499200 | -0.64546700 |

1-NO<sub>2</sub>-5-CHO-substituted

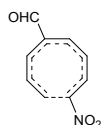

|   |             |             |             |
|---|-------------|-------------|-------------|
| C | 0.56312900  | -0.92373100 | 1.49445800  |
| C | -0.36506100 | -1.66207800 | 0.80983800  |
| C | -1.54792800 | -1.14193400 | 0.24188200  |
| C | -1.98317500 | 0.16211700  | 0.03438400  |
| C | -1.41545600 | 1.47011000  | 0.15634100  |
| C | -0.16108100 | 2.05313300  | 0.20786200  |
| C | 1.13210200  | 1.50574700  | 0.06050400  |
| C | 1.38413100  | 0.24048400  | -0.38452100 |
| H | 0.30496400  | 0.05348300  | 1.88388000  |
| H | 1.45311700  | -1.39400000 | 1.90547100  |
| H | -0.16917800 | -2.71838900 | 0.63879200  |
| H | -2.27217600 | -1.88338100 | -0.09388400 |
| H | -2.20015900 | 2.22897400  | 0.17324500  |
| H | -0.17723400 | 3.12438500  | 0.39373500  |
| H | 0.72103200  | -0.34998200 | -0.99611100 |
| N | 2.76348900  | -0.22317900 | -0.47778700 |
| O | 2.94987400  | -1.22124300 | -1.15536500 |
| O | 3.62813900  | 0.37989100  | 0.13713700  |
| H | 1.98473500  | 2.10416800  | 0.37264700  |
| C | -3.42626700 | 0.23195100  | -0.40121400 |
| H | -3.85578700 | 1.25368900  | -0.43416700 |
| O | -4.10502500 | -0.71758300 | -0.70881100 |

#### 1-NO<sub>2</sub>-5-CN-substituted

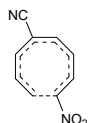

|   |             |             |             |
|---|-------------|-------------|-------------|
| C | 0.57774800  | -1.01889500 | 1.40827700  |
| C | -0.29232900 | -1.79100100 | 0.68375500  |
| C | -1.51436900 | -1.33840300 | 0.14347700  |
| C | -2.04054800 | -0.05380700 | 0.00685700  |
| C | -1.57891500 | 1.29358900  | 0.20065700  |
| C | -0.36583200 | 1.95196400  | 0.29654400  |
| C | 0.96295000  | 1.50672000  | 0.13472300  |
| C | 1.30229200  | 0.28590100  | -0.37468000 |
| H | 0.23792200  | -0.09856400 | 1.86745700  |
| H | 1.50383700  | -1.44068500 | 1.79074900  |
| H | -0.01198300 | -2.81465500 | 0.44630400  |
| H | -2.16838700 | -2.12250500 | -0.23191300 |
| H | -2.42008200 | 1.98288800  | 0.24935600  |
| H | -0.46100000 | 3.00629900  | 0.54433200  |
| H | 0.68861000  | -0.30091500 | -1.03973800 |
| N | 2.71221000  | -0.08000200 | -0.47608500 |
| O | 2.97072900  | -1.01858800 | -1.21148100 |
| O | 3.52543700  | 0.53745200  | 0.19101900  |
| H | 1.76847700  | 2.14228200  | 0.49474400  |
| C | -3.43315900 | -0.07077800 | -0.40823800 |
| N | -4.54274700 | -0.07668300 | -0.73903300 |

#### 1-NO<sub>2</sub>-5-NO<sub>2</sub>-substituted

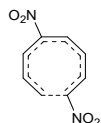

|   |             |             |             |
|---|-------------|-------------|-------------|
| C | 0.95374900  | -0.87919300 | 1.52080600  |
| C | 0.06579600  | -1.70491000 | 0.88299500  |
| C | -1.16314800 | -1.29652200 | 0.32264200  |
| C | -1.66371300 | -0.02811100 | 0.09253300  |
| C | -1.21862600 | 1.32115900  | 0.15951800  |
| C | -0.00033600 | 1.97779000  | 0.16585000  |
| C | 1.32387300  | 1.51548900  | 0.01667500  |
| C | 1.65461400  | 0.25380200  | -0.38860700 |
| H | 0.62954900  | 0.08142500  | 1.90183400  |
| H | 1.88312200  | -1.27489800 | 1.92260400  |
| H | 0.33517400  | -2.74759000 | 0.73227100  |
| H | -1.82910600 | -2.09545800 | 0.01207100  |
| H | -2.06364400 | 2.00269300  | 0.18006400  |
| H | -0.08760500 | 3.05027400  | 0.32023400  |
| H | 1.02972900  | -0.39064700 | -0.98633100 |
| N | 3.06298300  | -0.12019100 | -0.48601500 |
| O | 3.30584100  | -1.12781000 | -1.12941500 |
| O | 3.89059800  | 0.56172700  | 0.09495300  |
| H | 2.13726100  | 2.17901600  | 0.30060200  |
| N | -3.13003300 | -0.08709700 | -0.30391100 |
| O | -3.51860900 | -1.08251400 | -0.88388800 |
| O | -3.83762800 | 0.85974400  | -0.01769300 |

### 5.3.6 1,6-substituted

1-CH<sub>3</sub>-6-CH<sub>3</sub>-substituted

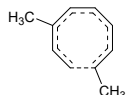

|   |             |             |             |
|---|-------------|-------------|-------------|
| C | 0.27180900  | -0.97077200 | 1.27880700  |
| C | -0.87733200 | -1.25100100 | 0.58039200  |
| C | -1.72139500 | -0.28012800 | -0.01120500 |
| C | -1.46418700 | 1.07925600  | -0.17126500 |
| C | -0.37317100 | 1.98334300  | -0.00343000 |
| C | 1.01045000  | 1.93387000  | 0.11963400  |
| C | 1.91665400  | 0.86089100  | 0.00216200  |
| C | 1.59191400  | -0.39042900 | -0.47518600 |
| H | 0.40587000  | 0.01309700  | 1.70924000  |
| H | 0.84949200  | -1.77672100 | 1.72462800  |
| H | -1.13578300 | -2.29547600 | 0.40074600  |
| H | -2.35277100 | 1.62615300  | -0.48883500 |
| H | -0.73610900 | 3.01151700  | -0.00813600 |
| H | 1.46675600  | 2.89707500  | 0.34310500  |
| H | 0.70433200  | -0.46163600 | -1.09499900 |
| C | 2.61223700  | -1.48216100 | -0.64243000 |
| H | 3.41786700  | -1.38668200 | 0.09235100  |
| H | 2.15934800  | -2.47242000 | -0.53260100 |
| H | 3.05953900  | -1.43791900 | -1.64349600 |
| H | 2.92639200  | 1.02341700  | 0.38214700  |
| C | -3.05904600 | -0.80032700 | -0.50609000 |
| H | -3.63643000 | -1.25181300 | 0.30825700  |
| H | -3.66376700 | -0.00777100 | -0.95350100 |
| H | -2.91233000 | -1.57606900 | -1.26724200 |

1-CH<sub>3</sub>-6-NH<sub>2</sub>-substituted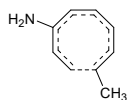

|   |             |             |             |
|---|-------------|-------------|-------------|
| C | 0.25874800  | -0.98127300 | 1.25834300  |
| C | -0.87336800 | -1.29712300 | 0.55148300  |
| C | -1.73725200 | -0.33423400 | -0.02632200 |
| C | -1.52141500 | 1.04106800  | -0.15579900 |
| C | -0.44900000 | 1.95870500  | -0.00345500 |
| C | 0.93678800  | 1.94692600  | 0.12896300  |
| C | 1.87740800  | 0.90253600  | 0.01487200  |
| C | 1.61374300  | -0.35739100 | -0.47418800 |
| H | 0.36036900  | 0.00350100  | 1.69610600  |
| H | 0.86556200  | -1.77087400 | 1.69341100  |
| H | -1.08857200 | -2.34455000 | 0.33914000  |
| H | -2.44579700 | 1.55926100  | -0.41473100 |
| H | -0.83618000 | 2.97808900  | 0.00036500  |
| H | 1.36171700  | 2.92147400  | 0.36297800  |
| H | 0.73594000  | -0.46899700 | -1.10170200 |
| C | 2.68009900  | -1.40647600 | -0.62833300 |
| H | 3.47707200  | -1.27150800 | 0.10996000  |
| H | 2.26894500  | -2.41444900 | -0.50982900 |
| H | 3.13255800  | -1.35667900 | -1.62697400 |
| H | 2.87664000  | 1.10074200  | 0.40714800  |
| N | -2.99805200 | -0.79678500 | -0.45390000 |
| H | -3.10319400 | -1.80307200 | -0.45306100 |
| H | -3.33320100 | -0.39186300 | -1.31889900 |

1-CH<sub>3</sub>-6-OH-substituted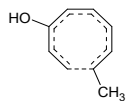

|   |             |             |             |
|---|-------------|-------------|-------------|
| C | 0.28409000  | -0.99641300 | 1.24305300  |
| C | -0.85051500 | -1.33525800 | 0.54664800  |
| C | -1.71386500 | -0.38183300 | -0.02912200 |
| C | -1.55064400 | 0.99481400  | -0.16851100 |
| C | -0.51054600 | 1.94659000  | 0.00463200  |
| C | 0.87374700  | 1.96325800  | 0.14333600  |
| C | 1.83523100  | 0.94002700  | 0.02437900  |
| C | 1.59630800  | -0.32612100 | -0.46751700 |
| H | 0.36000000  | -0.01605200 | 1.69520100  |
| H | 0.90459000  | -1.77633400 | 1.67616800  |
| H | -1.07931900 | -2.37595300 | 0.32929400  |
| H | -2.48450700 | 1.48548600  | -0.45282500 |
| H | -0.92593300 | 2.95445700  | 0.01308700  |
| H | 1.27664100  | 2.94457100  | 0.38752500  |
| H | 0.72876200  | -0.44981200 | -1.10682300 |
| C | 2.68934500  | -1.34632800 | -0.63141700 |
| H | 3.47436000  | -1.20939300 | 0.11909700  |
| H | 2.30012100  | -2.36544900 | -0.54169400 |
| H | 3.15057700  | -1.26088700 | -1.62332100 |
| H | 2.82964700  | 1.15675600  | 0.41841200  |
| O | -2.88533100 | -0.94241900 | -0.48569000 |
| H | -3.37119800 | -0.30045200 | -1.02148300 |



1-CH<sub>3</sub>-6-F-substituted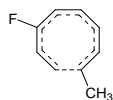

|   |             |             |             |
|---|-------------|-------------|-------------|
| C | 0.26589800  | -1.04118900 | 1.25152100  |
| C | -0.86358200 | -1.35273700 | 0.53567400  |
| C | -1.68591900 | -0.37122100 | -0.04143600 |
| C | -1.55391900 | 0.99251600  | -0.21097200 |
| C | -0.53159400 | 1.95759900  | 0.00184100  |
| C | 0.84631900  | 1.96800500  | 0.17401400  |
| C | 1.81149800  | 0.94510900  | 0.05526000  |
| C | 1.58620600  | -0.30950300 | -0.46664800 |
| H | 0.35264500  | -0.06740100 | 1.71465200  |
| H | 0.87672800  | -1.83469700 | 1.67276300  |
| H | -1.11225000 | -2.38508900 | 0.30153700  |
| H | -2.48867600 | 1.43299700  | -0.55489900 |
| H | -0.95264200 | 2.96260200  | 0.00495800  |
| H | 1.24781600  | 2.94496000  | 0.43783300  |
| H | 0.71684400  | -0.43136300 | -1.10434900 |
| C | 2.68575100  | -1.31958000 | -0.64371900 |
| H | 3.46913700  | -1.18934800 | 0.10941200  |
| H | 2.30366000  | -2.34263600 | -0.57347200 |
| H | 3.14621500  | -1.21249300 | -1.63380400 |
| H | 2.80001900  | 1.15817700  | 0.46506000  |
| F | -2.85816100 | -0.87218900 | -0.53032200 |

1-CH<sub>3</sub>-6-CHO-substituted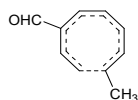

|   |             |             |             |
|---|-------------|-------------|-------------|
| C | 0.66411100  | -1.03025800 | 1.35818500  |
| C | -0.51172000 | -1.28014000 | 0.70563200  |
| C | -1.37334800 | -0.28623600 | 0.17130300  |
| C | -1.16826400 | 1.07861400  | -0.00907500 |
| C | -0.09055600 | 1.99774000  | 0.09222800  |
| C | 1.29783900  | 1.93975300  | 0.12856700  |
| C | 2.19300100  | 0.86794400  | -0.06828600 |
| C | 1.84611800  | -0.36797000 | -0.56250500 |
| H | 0.85440700  | -0.04853600 | 1.77080900  |
| H | 1.26296200  | -1.84954500 | 1.74702400  |
| H | -0.79663200 | -2.31729900 | 0.52291600  |
| H | -2.10011800 | 1.57802100  | -0.27723300 |
| H | -0.45700700 | 3.02377900  | 0.10982300  |
| H | 1.77313900  | 2.89805200  | 0.33314900  |
| H | 0.90221500  | -0.44384600 | -1.09284000 |
| C | 2.85187200  | -1.45034700 | -0.82672300 |
| H | 3.71630500  | -1.36306700 | -0.16175600 |
| H | 2.41129200  | -2.44349800 | -0.69955600 |
| H | 3.21080200  | -1.38488700 | -1.86173500 |
| H | 3.22740200  | 1.02854200  | 0.23768700  |
| C | -2.71798400 | -0.78881100 | -0.23254200 |
| H | -2.84395600 | -1.88822300 | -0.14263000 |
| O | -3.63840300 | -0.10890300 | -0.62829600 |

1-CH<sub>3</sub>-6-CN-substituted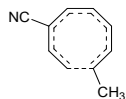

|   |             |             |             |
|---|-------------|-------------|-------------|
| C | 0.46075200  | -0.93999900 | 1.37159100  |
| C | -0.73156100 | -1.11094300 | 0.72146300  |
| C | -1.47053700 | -0.04629900 | 0.13825200  |
| C | -1.11332900 | 1.28244200  | -0.09529200 |
| C | 0.06853500  | 2.06790700  | -0.01497300 |
| C | 1.44055500  | 1.85502300  | 0.04522500  |
| C | 2.20847000  | 0.68078000  | -0.08535000 |
| C | 1.72553600  | -0.53048900 | -0.52806800 |
| H | 0.73205200  | 0.03561500  | 1.75243900  |
| H | 0.97195600  | -1.79425300 | 1.80647300  |
| H | -1.12405600 | -2.11482800 | 0.57390800  |
| H | -1.96834900 | 1.88892300  | -0.39003000 |
| H | -0.17884400 | 3.12840900  | -0.04247900 |
| H | 2.01733100  | 2.76203000  | 0.21913100  |
| H | 0.79518100  | -0.51862100 | -1.08678700 |
| C | 2.60259600  | -1.73319900 | -0.72207100 |
| H | 3.46483200  | -1.71211400 | -0.04896500 |
| H | 2.04976000  | -2.66213500 | -0.55406700 |
| H | 2.97626400  | -1.76156900 | -1.75332200 |
| H | 3.24901600  | 0.73412900  | 0.23622900  |
| C | -2.81621200 | -0.39226000 | -0.26506400 |
| N | -3.89056800 | -0.68333900 | -0.58668700 |

1-CH<sub>3</sub>-6-NO<sub>2</sub>-substituted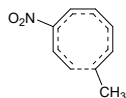

|   |             |             |             |
|---|-------------|-------------|-------------|
| C | 0.79961500  | -0.95039500 | 1.35991500  |
| C | -0.40887600 | -1.07396100 | 0.72973500  |
| C | -1.10671900 | 0.03715000  | 0.20640100  |
| C | -0.73125100 | 1.35423700  | 0.00195400  |
| C | 0.47416600  | 2.10160400  | 0.07694100  |
| C | 1.84032900  | 1.84536200  | 0.09689500  |
| C | 2.56601300  | 0.65274900  | -0.08756300 |
| C | 2.03046400  | -0.52675900 | -0.55650400 |
| H | 1.10677800  | 0.00313000  | 1.76848200  |
| H | 1.29965700  | -1.83296700 | 1.74842900  |
| H | -0.83323900 | -2.05541600 | 0.54879300  |
| H | -1.58186300 | 1.98104900  | -0.24950900 |
| H | 0.25827900  | 3.16886600  | 0.08797100  |
| H | 2.44906800  | 2.72840800  | 0.28474100  |
| H | 1.09101200  | -0.46383200 | -1.09645600 |
| C | 2.85852200  | -1.75383700 | -0.80347800 |
| H | 3.73061300  | -1.78651300 | -0.14379600 |
| H | 2.27319300  | -2.66637900 | -0.65786000 |
| H | 3.21515200  | -1.76035700 | -1.84108500 |
| H | 3.61475700  | 0.66083800  | 0.21043600  |
| N | -2.51723100 | -0.26485600 | -0.18968600 |
| O | -2.89235700 | -1.42173800 | -0.09155800 |
| O | -3.22468800 | 0.64177100  | -0.59320700 |

1- NH<sub>2</sub>-6-CH<sub>3</sub>-substituted

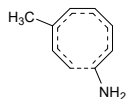

|   |             |             |             |
|---|-------------|-------------|-------------|
| C | 0.28760000  | -0.94594500 | 1.27906200  |
| C | -0.88541300 | -1.23000600 | 0.60396600  |
| C | -1.70413900 | -0.26712500 | -0.01289100 |
| C | -1.42384200 | 1.09823000  | -0.16476600 |
| C | -0.32357900 | 1.97201200  | 0.00080700  |
| C | 1.06890400  | 1.87698400  | 0.12275800  |
| C | 1.94351100  | 0.80086400  | -0.02409700 |
| C | 1.57125300  | -0.46455000 | -0.47920200 |
| H | 0.41849000  | 0.03680100  | 1.71321800  |
| H | 0.84715700  | -1.75410800 | 1.74491700  |
| H | -1.16236400 | -2.27533100 | 0.46108900  |
| H | -2.30873400 | 1.65811400  | -0.47504100 |
| H | -0.65075900 | 3.01146300  | -0.01870000 |
| H | 1.55301200  | 2.82456100  | 0.35292400  |
| H | 0.68348800  | -0.53891300 | -1.09570100 |
| N | 2.52013800  | -1.44989900 | -0.72839200 |
| H | 3.31236900  | -1.45503400 | -0.09654400 |
| H | 2.14572400  | -2.38064100 | -0.86153500 |
| H | 2.98178400  | 0.94881300  | 0.27369000  |
| C | -3.06597000 | -0.73244100 | -0.49912900 |
| H | -3.83307800 | -0.57201400 | 0.26854300  |
| H | -3.38161200 | -0.19955000 | -1.40044600 |
| H | -3.05639600 | -1.80301500 | -0.72671700 |

1- NH<sub>2</sub>-6-NH<sub>2</sub>-substituted

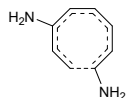

|   |             |             |             |
|---|-------------|-------------|-------------|
| C | 0.28145500  | -0.95244500 | 1.25181400  |
| C | -0.88235800 | -1.26634300 | 0.57583100  |
| C | -1.72600700 | -0.30791200 | -0.01365500 |
| C | -1.48878000 | 1.07111700  | -0.13740600 |
| C | -0.39950800 | 1.95657000  | 0.00341000  |
| C | 0.99573200  | 1.89550900  | 0.11841700  |
| C | 1.90241900  | 0.84283600  | -0.02253500 |
| C | 1.58824500  | -0.43655000 | -0.47519400 |
| H | 0.38118600  | 0.02750500  | 1.70125100  |
| H | 0.86658300  | -1.74944400 | 1.70455900  |
| H | -1.12203300 | -2.31536700 | 0.39688700  |
| H | -2.40847000 | 1.60557700  | -0.37977100 |
| H | -0.74977900 | 2.98861700  | 0.00274000  |
| H | 1.45386000  | 2.85494700  | 0.35112500  |
| H | 0.71666600  | -0.55414200 | -1.10747600 |
| N | 2.58583300  | -1.38585000 | -0.70613200 |
| H | 3.36400500  | -1.34644400 | -0.05749600 |
| H | 2.24708300  | -2.33465000 | -0.80735900 |
| H | 2.93172500  | 1.02760300  | 0.28790100  |
| N | -3.00081800 | -0.74145600 | -0.45409000 |
| H | -3.13160000 | -1.74456900 | -0.41197800 |
| H | -3.27151400 | -0.38518600 | -1.36291600 |

1- NH<sub>2</sub>-6-OH-substituted

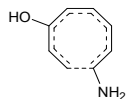

|   |             |             |             |
|---|-------------|-------------|-------------|
| C | 0.30872900  | -0.96311400 | 1.23280800  |
| C | -0.85933700 | -1.30448200 | 0.57201800  |
| C | -1.70464200 | -0.35810500 | -0.01595700 |
| C | -1.52214300 | 1.02487100  | -0.14792000 |
| C | -0.46447100 | 1.94421800  | 0.01080700  |
| C | 0.93171200  | 1.91371500  | 0.13178900  |
| C | 1.86042800  | 0.88404300  | -0.01557800 |
| C | 1.57390300  | -0.40587000 | -0.46872400 |
| H | 0.37970300  | 0.01196200  | 1.69792700  |
| H | 0.90960500  | -1.74943900 | 1.68348000  |
| H | -1.10954100 | -2.34751500 | 0.38953500  |
| H | -2.45338800 | 1.53267700  | -0.41049400 |
| H | -0.84330800 | 2.96578900  | 0.01250700  |
| H | 1.36671500  | 2.88166500  | 0.37300300  |
| H | 0.71549100  | -0.53643400 | -1.11645200 |
| N | 2.59810400  | -1.32439400 | -0.70480200 |
| H | 3.36870000  | -1.27856000 | -0.04773500 |
| H | 2.28571200  | -2.27891800 | -0.83268900 |
| H | 2.88596600  | 1.09092900  | 0.29258600  |
| O | -2.88809300 | -0.89662400 | -0.48085700 |
| H | -3.33271100 | -0.26005800 | -1.05665700 |

1- NH<sub>2</sub>-6-F-substituted

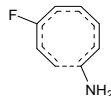

|   |             |             |             |
|---|-------------|-------------|-------------|
| C | 0.29160400  | -1.00123500 | 1.24120800  |
| C | -0.87449400 | -1.31823400 | 0.56462400  |
| C | -1.67732500 | -0.34642300 | -0.02785500 |
| C | -1.52282900 | 1.02564100  | -0.19434700 |
| C | -0.48092500 | 1.95460600  | 0.00102600  |
| C | 0.91012100  | 1.91542700  | 0.16429700  |
| C | 1.83958300  | 0.88622000  | 0.02007400  |
| C | 1.56150600  | -0.39412600 | -0.46603400 |
| H | 0.37030400  | -0.03300900 | 1.71791900  |
| H | 0.88152400  | -1.80034100 | 1.68278000  |
| H | -1.14753700 | -2.35352600 | 0.37213900  |
| H | -2.45487600 | 1.48597300  | -0.51994700 |
| H | -0.86084500 | 2.97517100  | -0.01316700 |
| H | 1.34388100  | 2.87809700  | 0.42846600  |
| H | 0.69929300  | -0.51606100 | -1.11113300 |
| N | 2.58480000  | -1.30085100 | -0.71871600 |
| H | 3.36640700  | -1.26445700 | -0.07490500 |
| H | 2.28502600  | -2.25228100 | -0.88857700 |
| H | 2.86067100  | 1.08758500  | 0.34519800  |
| F | -2.85787800 | -0.82582700 | -0.52508000 |

1- NH<sub>2</sub>-6-CHO-substituted

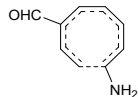

|   |             |             |             |
|---|-------------|-------------|-------------|
| C | 0.70499200  | -0.98313700 | 1.33670000  |
| C | -0.51118600 | -1.24699300 | 0.74027900  |
| C | -1.36248500 | -0.27112000 | 0.19051600  |
| C | -1.14023600 | 1.10865600  | 0.01676700  |
| C | -0.05113200 | 1.98799400  | 0.08280900  |
| C | 1.35390400  | 1.88171200  | 0.11063600  |
| C | 2.20763500  | 0.81177800  | -0.10999500 |
| C | 1.80166000  | -0.45646500 | -0.55453300 |
| H | 0.87868300  | -0.00504800 | 1.76509500  |
| H | 1.29290600  | -1.80089400 | 1.74657100  |
| H | -0.81234500 | -2.28764500 | 0.60496200  |
| H | -2.07261700 | 1.62331000  | -0.21793700 |
| H | -0.37546800 | 3.02767400  | 0.06811500  |
| H | 1.85787700  | 2.82480500  | 0.31547400  |
| H | 0.86336400  | -0.52903600 | -1.09188400 |
| N | 2.72635000  | -1.41909900 | -0.89317500 |
| H | 3.58713400  | -1.43143400 | -0.36031800 |
| H | 2.36811100  | -2.34423200 | -1.08688900 |
| H | 3.26839100  | 0.95812900  | 0.09142300  |
| C | -2.70162400 | -0.76312800 | -0.21487000 |
| H | -2.84025400 | -1.86005800 | -0.10482100 |
| O | -3.61367400 | -0.08220700 | -0.63342700 |

#### 1-NH<sub>2</sub>-6-CN-substituted

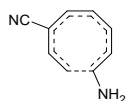

|   |             |             |             |
|---|-------------|-------------|-------------|
| C | 0.50896300  | -0.90094900 | 1.34273800  |
| C | -0.72847300 | -1.07557400 | 0.75199200  |
| C | -1.45875100 | -0.03055700 | 0.15745400  |
| C | -1.08182600 | 1.31048800  | -0.07161400 |
| C | 0.10722400  | 2.05325800  | -0.02506600 |
| C | 1.49000500  | 1.79018700  | 0.02862500  |
| C | 2.21802300  | 0.62121800  | -0.12496900 |
| C | 1.67644000  | -0.61606000 | -0.51485400 |
| H | 0.76464400  | 0.07178300  | 1.74136900  |
| H | 1.00406800  | -1.75335900 | 1.80068200  |
| H | -1.13868500 | -2.07899000 | 0.65294600  |
| H | -1.93559600 | 1.93346800  | -0.33429200 |
| H | -0.09658400 | 3.12118400  | -0.08514200 |
| H | 2.09402200  | 2.67921900  | 0.20074700  |
| H | 0.75676100  | -0.60674800 | -1.08786300 |
| N | 2.49469100  | -1.69262200 | -0.78268100 |
| H | 3.33116900  | -1.78043400 | -0.21897400 |
| H | 2.03770200  | -2.57867700 | -0.95033500 |
| H | 3.28490900  | 0.65499600  | 0.09363000  |
| C | -2.80208700 | -0.36645000 | -0.25319700 |
| N | -3.87748000 | -0.64677900 | -0.58295000 |

#### 1-NH<sub>2</sub>-6-NO<sub>2</sub>-substituted

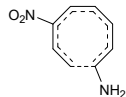

|   |             |             |             |
|---|-------------|-------------|-------------|
| C | 0.84946500  | -0.91828800 | 1.32336100  |
| C | -0.40471400 | -1.04395300 | 0.75541600  |
| C | -1.09809800 | 0.04723400  | 0.22360400  |
| C | -0.70597300 | 1.38149900  | 0.03635800  |
| C | 0.50366000  | 2.08439100  | 0.07405400  |
| C | 1.88156500  | 1.77819500  | 0.08144000  |
| C | 2.56744700  | 0.59648700  | -0.13075300 |
| C | 1.97307700  | -0.61267600 | -0.54402300 |
| H | 1.14008100  | 0.03041200  | 1.75472500  |
| H | 1.33183000  | -1.80136300 | 1.73379600  |
| H | -0.84753400 | -2.02537400 | 0.61970200  |
| H | -1.55469400 | 2.02637400  | -0.17170200 |
| H | 0.33201700  | 3.15913300  | 0.05760700  |
| H | 2.51609200  | 2.64247600  | 0.26892700  |
| H | 1.04653900  | -0.55220900 | -1.10294400 |
| N | 2.74895900  | -1.70412400 | -0.86141000 |
| H | 3.59499900  | -1.83902300 | -0.32209300 |
| H | 2.26340700  | -2.56748000 | -1.06303900 |
| H | 3.64068700  | 0.58910100  | 0.05607100  |
| N | -2.49575600 | -0.24648600 | -0.18118200 |
| O | -3.18813400 | 0.66236800  | -0.61026600 |
| O | -2.89116900 | -1.39800700 | -0.07094000 |

#### 1-OH-6-CH<sub>3</sub>-substituted

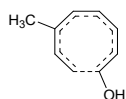

|   |             |             |             |
|---|-------------|-------------|-------------|
| C | 0.28137400  | -0.98756500 | 1.23830700  |
| C | -0.89945200 | -1.23207600 | 0.56802900  |
| C | -1.72069200 | -0.23840500 | -0.00064100 |
| C | -1.42280100 | 1.12130600  | -0.12826400 |
| C | -0.29755900 | 1.97022000  | 0.03566500  |
| C | 1.09067200  | 1.85019700  | 0.11988500  |
| C | 1.95161300  | 0.76062200  | -0.05346900 |
| C | 1.56703100  | -0.49754400 | -0.49672300 |
| H | 0.43275900  | -0.01811800 | 1.69659700  |
| H | 0.84039100  | -1.81874800 | 1.66057100  |
| H | -1.18564200 | -2.26858700 | 0.38461700  |
| H | -2.29837000 | 1.70692900  | -0.41101600 |
| H | -0.60649700 | 3.01522300  | 0.05203100  |
| H | 1.59744400  | 2.78652300  | 0.34591300  |
| H | 0.70695300  | -0.61307600 | -1.14149000 |
| O | 2.45754600  | -1.51158800 | -0.67495400 |
| H | 3.28287300  | -1.31012700 | -0.20789200 |
| H | 2.99304600  | 0.89423800  | 0.24422100  |
| C | -3.07482800 | -0.70774800 | -0.50214900 |
| H | -3.66844900 | -1.15010800 | 0.30546000  |
| H | -3.65213800 | 0.11112200  | -0.93857200 |
| H | -2.95487800 | -1.47660900 | -1.27465400 |

#### 1-OH-6-NH<sub>2</sub>-substituted

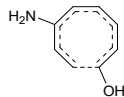

|   |             |             |             |
|---|-------------|-------------|-------------|
| C | 0.26901600  | -1.00402000 | 1.21351600  |
| C | -0.89483300 | -1.28030600 | 0.52999600  |
| C | -1.73955300 | -0.29271800 | -0.01648700 |
| C | -1.48776200 | 1.08306300  | -0.10813900 |
| C | -0.38086200 | 1.94931200  | 0.03840000  |
| C | 1.01084600  | 1.86854400  | 0.12554400  |
| C | 1.91063400  | 0.80722300  | -0.04332500 |
| C | 1.59902100  | -0.46485400 | -0.49519300 |
| H | 0.38905900  | -0.03661500 | 1.68570600  |
| H | 0.85758700  | -1.82256000 | 1.61874900  |
| H | -1.13666400 | -2.31946400 | 0.30601600  |
| H | -2.40116200 | 1.63730600  | -0.32820500 |
| H | -0.71645900 | 2.98570200  | 0.07072800  |
| H | 1.48686100  | 2.81846700  | 0.35983100  |
| H | 0.75596300  | -0.63477600 | -1.14920800 |
| O | 2.54541900  | -1.43594600 | -0.65024800 |
| H | 3.35679500  | -1.17884500 | -0.18625200 |
| H | 2.94160600  | 0.98438000  | 0.27048100  |
| N | -3.01961800 | -0.70535300 | -0.44819000 |
| H | -3.15596800 | -1.70828800 | -0.45019800 |
| H | -3.32269300 | -0.29774000 | -1.32419800 |

#### 1-OH-6-OH-substituted

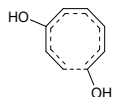

|   |             |             |             |
|---|-------------|-------------|-------------|
| C | 0.29295600  | -1.01840100 | 1.19557200  |
| C | -0.87547900 | -1.31767400 | 0.52478700  |
| C | -1.71896800 | -0.33889900 | -0.02025000 |
| C | -1.51803400 | 1.04041600  | -0.12011000 |
| C | -0.44013000 | 1.93891000  | 0.04702700  |
| C | 0.95228100  | 1.88509100  | 0.14054000  |
| C | 1.87184300  | 0.84437900  | -0.03546600 |
| C | 1.58484800  | -0.43621600 | -0.49001300 |
| H | 0.38865100  | -0.05543800 | 1.68199100  |
| H | 0.89441400  | -1.82828700 | 1.59912000  |
| H | -1.13214100 | -2.34981100 | 0.29770100  |
| H | -2.44221400 | 1.57046000  | -0.36169400 |
| H | -0.80261900 | 2.96568200  | 0.08392500  |
| H | 1.40785900  | 2.84239000  | 0.38493700  |
| H | 0.75456000  | -0.61560100 | -1.15805000 |
| O | 2.55567400  | -1.38038300 | -0.65215800 |
| H | 3.35740300  | -1.11220700 | -0.17767200 |
| H | 2.89940300  | 1.04090000  | 0.27716200  |
| O | -2.91259800 | -0.85104000 | -0.47989500 |
| H | -3.36582800 | -0.19233900 | -1.02351200 |

#### 1-OH-6-F-substituted

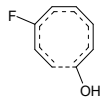

|   |             |             |             |
|---|-------------|-------------|-------------|
| C | 0.27292500  | -1.05675800 | 1.20342900  |
| C | -0.89204200 | -1.33077800 | 0.51694300  |
| C | -1.69074400 | -0.32441300 | -0.03195300 |
| C | -1.51473800 | 1.04368200  | -0.16712700 |
| C | -0.45028200 | 1.95092800  | 0.03934100  |
| C | 0.93666200  | 1.88665500  | 0.17301700  |
| C | 1.85526800  | 0.84339600  | -0.00053800 |
| C | 1.57068000  | -0.42360700 | -0.49024000 |
| H | 0.37725700  | -0.09958500 | 1.69829500  |
| H | 0.86434200  | -1.87798300 | 1.59788000  |
| H | -1.17231500 | -2.35418000 | 0.27918800  |
| H | -2.44023900 | 1.52968800  | -0.47279100 |
| H | -0.81434000 | 2.97698900  | 0.06442800  |
| H | 1.39301300  | 2.83748100  | 0.44080600  |
| H | 0.73418500  | -0.58803400 | -1.15529700 |
| O | 2.53462400  | -1.36603200 | -0.67137300 |
| H | 3.34206600  | -1.10919800 | -0.19989400 |
| H | 2.87803900  | 1.02950200  | 0.33230800  |
| F | -2.88504200 | -0.77233900 | -0.51901900 |

1-OH-6-CHO-substituted

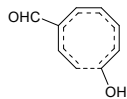

|   |             |             |             |
|---|-------------|-------------|-------------|
| C | 0.68424600  | -1.04691500 | 1.31230700  |
| C | -0.51920800 | -1.27806400 | 0.69109000  |
| C | -1.36644000 | -0.27112500 | 0.17822100  |
| C | -1.13210900 | 1.10067600  | 0.03259700  |
| C | -0.02921600 | 1.97439600  | 0.12674400  |
| C | 1.36468200  | 1.85977500  | 0.13257300  |
| C | 2.21767700  | 0.78161300  | -0.11753200 |
| C | 1.81333500  | -0.46230900 | -0.58398700 |
| H | 0.87620300  | -0.07842900 | 1.75586200  |
| H | 1.27506900  | -1.88230700 | 1.67799500  |
| H | -0.81911400 | -2.31028800 | 0.50464200  |
| H | -2.05649100 | 1.63109700  | -0.19876400 |
| H | -0.34951200 | 3.01496700  | 0.15646700  |
| H | 1.88036600  | 2.79461000  | 0.34466100  |
| H | 0.88851100  | -0.57349600 | -1.13377600 |
| O | 2.68339400  | -1.45651100 | -0.86622400 |
| H | 3.54938700  | -1.26509200 | -0.47318000 |
| H | 3.27691800  | 0.91756300  | 0.10406300  |
| C | -2.71847100 | -0.73947200 | -0.23058000 |
| H | -2.86576600 | -1.83771500 | -0.15952200 |
| O | -3.62621300 | -0.03378400 | -0.61215800 |

1-OH-6-CN-substituted



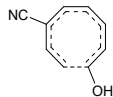

|   |             |             |             |
|---|-------------|-------------|-------------|
| C | 0.48562200  | -0.96329500 | 1.31790300  |
| C | -0.73564600 | -1.10973500 | 0.70216400  |
| C | -1.46314900 | -0.03285700 | 0.14777000  |
| C | -1.07796600 | 1.30147800  | -0.05088100 |
| C | 0.12260100  | 2.03966200  | 0.02006600  |
| C | 1.49488900  | 1.77194100  | 0.04989900  |
| C | 2.22544800  | 0.59650600  | -0.13308300 |
| C | 1.69230000  | -0.61957200 | -0.54685500 |
| H | 0.75762700  | -0.00147100 | 1.73324300  |
| H | 0.98585100  | -1.83566700 | 1.72863300  |
| H | -1.14243300 | -2.10740200 | 0.55131700  |
| H | -1.92373100 | 1.93836800  | -0.30551300 |
| H | -0.07941100 | 3.10944800  | 0.00510700  |
| H | 2.10683200  | 2.65360000  | 0.23036000  |
| H | 0.78276100  | -0.65283600 | -1.13123200 |
| O | 2.45286500  | -1.71737300 | -0.75515000 |
| H | 3.32110900  | -1.61040800 | -0.33576000 |
| H | 3.28906900  | 0.62452900  | 0.10656000  |
| C | -2.81590700 | -0.34397000 | -0.25619400 |
| N | -3.89853500 | -0.60287500 | -0.57803700 |

1-OH-6-NO<sub>2</sub>-substituted

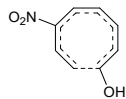

|   |             |             |             |
|---|-------------|-------------|-------------|
| C | 0.82400300  | -0.98213900 | 1.29944600  |
| C | -0.41112700 | -1.08144900 | 0.70283300  |
| C | -1.10122700 | 0.03899600  | 0.21155000  |
| C | -0.70497800 | 1.36430900  | 0.04924000  |
| C | 0.51413200  | 2.06808400  | 0.11475500  |
| C | 1.88008000  | 1.76323900  | 0.10264800  |
| C | 2.57412500  | 0.57748900  | -0.13550300 |
| C | 1.99969400  | -0.61144600 | -0.57733000 |
| H | 1.12933100  | -0.04507400 | 1.74686300  |
| H | 1.31237200  | -1.88241100 | 1.66093700  |
| H | -0.84821500 | -2.05631800 | 0.51503800  |
| H | -1.54777800 | 2.01770600  | -0.15680700 |
| H | 0.34064700  | 3.14224800  | 0.14204900  |
| H | 2.51917900  | 2.62213200  | 0.29816900  |
| H | 1.08218400  | -0.60280700 | -1.14998000 |
| O | 2.72680300  | -1.72014700 | -0.83136300 |
| H | 3.60203000  | -1.65345900 | -0.41791300 |
| H | 3.64326200  | 0.56970100  | 0.07912300  |
| N | -2.51248600 | -0.23361500 | -0.18377100 |
| O | -2.91259000 | -1.38293800 | -0.09098400 |
| O | -3.20094100 | 0.69072100  | -0.58226700 |

1-F-6-CH<sub>3</sub>-substituted

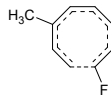

|   |             |             |             |
|---|-------------|-------------|-------------|
| C | 0.24069500  | -1.04348600 | 1.24301700  |
| C | -0.92829400 | -1.24062700 | 0.55123400  |
| C | -1.72231800 | -0.21068200 | -0.00946700 |
| C | -1.39217800 | 1.13618900  | -0.12969900 |
| C | -0.24900100 | 1.96781600  | 0.05800300  |
| C | 1.13065800  | 1.83151700  | 0.14000600  |
| C | 1.98223100  | 0.72489700  | -0.04269100 |
| C | 1.57471400  | -0.49623600 | -0.51057800 |
| H | 0.43783900  | -0.07878700 | 1.69378200  |
| H | 0.78696900  | -1.89205700 | 1.64649000  |
| H | -1.24318600 | -2.26455000 | 0.34635000  |
| H | -2.24987400 | 1.74249300  | -0.42240600 |
| H | -0.54756500 | 3.01523100  | 0.09970400  |
| H | 1.65107400  | 2.75707300  | 0.37708600  |
| H | 0.72762300  | -0.64662700 | -1.16508300 |
| F | 2.49471200  | -1.47763800 | -0.62971600 |
| H | 3.01978000  | 0.80978900  | 0.27309200  |
| C | -3.08844700 | -0.64359600 | -0.50930900 |
| H | -3.69079900 | -1.06867700 | 0.30108400  |
| H | -3.64455000 | 0.18865700  | -0.94730000 |
| H | -2.98807800 | -1.41856200 | -1.27845100 |

#### 1-F-6-NH<sub>2</sub>-substituted

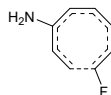

|   |             |             |             |
|---|-------------|-------------|-------------|
| C | 0.22606000  | -1.05367700 | 1.21976200  |
| C | -0.92725700 | -1.28622500 | 0.51709900  |
| C | -1.74458400 | -0.26369200 | -0.02588600 |
| C | -1.45580200 | 1.10130100  | -0.11282200 |
| C | -0.33001400 | 1.94707900  | 0.05611400  |
| C | 1.05471200  | 1.84860900  | 0.14736400  |
| C | 1.94444200  | 0.77053400  | -0.02969400 |
| C | 1.60597200  | -0.46732800 | -0.50547100 |
| H | 0.39039800  | -0.08698600 | 1.67976100  |
| H | 0.80171900  | -1.88741200 | 1.61204300  |
| H | -1.19817300 | -2.31450200 | 0.27744900  |
| H | -2.35090400 | 1.67970200  | -0.34478900 |
| H | -0.65255100 | 2.98710700  | 0.10507700  |
| H | 1.54418600  | 2.78846000  | 0.39215900  |
| H | 0.77705100  | -0.66869300 | -1.16848300 |
| F | 2.57989900  | -1.40215100 | -0.60885600 |
| H | 2.97473100  | 0.89850400  | 0.29728200  |
| N | -3.02771200 | -0.64685100 | -0.45547600 |
| H | -3.18914700 | -1.64474000 | -0.49118300 |
| H | -3.36358600 | -0.18373100 | -1.29006500 |

#### 1-F-6-OH-substituted

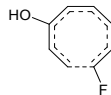

|   |             |             |             |
|---|-------------|-------------|-------------|
| C | 0.24897700  | -1.07064500 | 1.20400900  |
| C | -0.90956700 | -1.32212600 | 0.51259500  |
| C | -1.72326500 | -0.30583000 | -0.02832000 |
| C | -1.48281600 | 1.06246100  | -0.12459200 |
| C | -0.38400800 | 1.94037500  | 0.06583000  |
| C | 1.00084100  | 1.86569800  | 0.16142100  |
| C | 1.90796600  | 0.80474500  | -0.02240900 |
| C | 1.58808500  | -0.43892900 | -0.50262000 |
| H | 0.39188100  | -0.10718200 | 1.67734000  |
| H | 0.83770500  | -1.89693500 | 1.59250700  |
| H | -1.19744700 | -2.34176400 | 0.26764700  |
| H | -2.38779800 | 1.61759500  | -0.38101600 |
| H | -0.73234400 | 2.97132100  | 0.12149500  |
| H | 1.47280800  | 2.81173700  | 0.41648200  |
| H | 0.77035100  | -0.64509900 | -1.17840400 |
| F | 2.57897700  | -1.35286900 | -0.60963000 |
| H | 2.93569000  | 0.94712100  | 0.30613300  |
| O | -2.92484300 | -0.78636600 | -0.49086000 |
| H | -3.38016700 | -0.10454100 | -1.00411000 |

#### 1-F-6-F-substituted

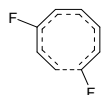

|   |             |             |             |
|---|-------------|-------------|-------------|
| C | 0.22814100  | -1.11455500 | 1.20615400  |
| C | -0.92709200 | -1.33570700 | 0.49959900  |
| C | -1.69467400 | -0.29006600 | -0.03929900 |
| C | -1.47846000 | 1.06706200  | -0.16812000 |
| C | -0.39252700 | 1.95402900  | 0.06169400  |
| C | 0.98630400  | 1.86817700  | 0.19218700  |
| C | 1.89186300  | 0.80329100  | 0.00988300  |
| C | 1.57464800  | -0.42574800 | -0.50431200 |
| H | 0.38245500  | -0.15943100 | 1.69165000  |
| H | 0.80498400  | -1.95457600 | 1.58196600  |
| H | -1.23948100 | -2.34412300 | 0.23931600  |
| H | -2.38637000 | 1.57897300  | -0.48350100 |
| H | -0.74333600 | 2.98393900  | 0.11084800  |
| H | 1.46017000  | 2.80715700  | 0.46956600  |
| H | 0.75338500  | -0.61670100 | -1.18117200 |
| F | 2.55832000  | -1.34162100 | -0.62300500 |
| H | 2.91425900  | 0.93444100  | 0.35823800  |
| F | -2.90001800 | -0.70155500 | -0.52517600 |

#### 1-F-6-CHO-substituted

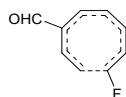

|   |             |             |            |
|---|-------------|-------------|------------|
| C | 0.65853000  | -1.11888300 | 1.30910400 |
| C | -0.53754000 | -1.30569100 | 0.67166600 |
| C | -1.36483100 | -0.26670600 | 0.17338100 |

|   |             |             |             |
|---|-------------|-------------|-------------|
| C | -1.11067200 | 1.09510000  | 0.03752700  |
| C | 0.00283100  | 1.96590000  | 0.16185800  |
| C | 1.38755800  | 1.85027800  | 0.15878700  |
| C | 2.24110900  | 0.76305000  | -0.11102000 |
| C | 1.82171000  | -0.44255900 | -0.60314000 |
| H | 0.89235100  | -0.15826600 | 1.74978700  |
| H | 1.23912700  | -1.97139700 | 1.65023800  |
| H | -0.86161500 | -2.32614800 | 0.46303700  |
| H | -2.02404300 | 1.63887200  | -0.20644800 |
| H | -0.31880900 | 3.00454200  | 0.22751000  |
| H | 1.90933300  | 2.77851300  | 0.38260200  |
| H | 0.91009100  | -0.59251400 | -1.16546200 |
| F | 2.73499400  | -1.40017000 | -0.83160600 |
| H | 3.29772800  | 0.85787000  | 0.12802200  |
| C | -2.73027000 | -0.70672400 | -0.23985300 |
| H | -2.89911600 | -1.80204300 | -0.17878500 |
| O | -3.62131800 | 0.02119000  | -0.61448800 |

#### 1-F-6-CN-substituted

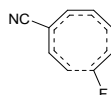

|   |             |             |             |
|---|-------------|-------------|-------------|
| C | 0.44889700  | -1.02440300 | 1.32531300  |
| C | -0.75822100 | -1.13064800 | 0.68897600  |
| C | -1.46026100 | -0.02296100 | 0.14348000  |
| C | -1.05274400 | 1.29801400  | -0.04775700 |
| C | 0.16064700  | 2.02946700  | 0.05063900  |
| C | 1.52291900  | 1.75730100  | 0.07192600  |
| C | 2.25040100  | 0.56923700  | -0.12641200 |
| C | 1.70294900  | -0.60636300 | -0.56719800 |
| H | 0.76219700  | -0.07152500 | 1.73229200  |
| H | 0.94028800  | -1.91176000 | 1.71367800  |
| H | -1.18822200 | -2.11486500 | 0.51640500  |
| H | -1.88379500 | 1.94824500  | -0.31643500 |
| H | -0.03934300 | 3.09972900  | 0.06753800  |
| H | 2.14245700  | 2.63120700  | 0.26174400  |
| H | 0.79879600  | -0.67696200 | -1.15669800 |
| F | 2.50387400  | -1.67231000 | -0.72018900 |
| H | 3.30652200  | 0.55509000  | 0.13270100  |
| C | -2.82002900 | -0.30416100 | -0.26364100 |
| N | -3.90587300 | -0.54303900 | -0.58878200 |

#### 1-F-6-NO<sub>2</sub>-substituted

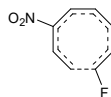

|   |             |             |             |
|---|-------------|-------------|-------------|
| C | 0.79106400  | -1.03376000 | 1.31475300  |
| C | -0.42817700 | -1.10478000 | 0.69736800  |
| C | -1.09631400 | 0.03895400  | 0.20868000  |
| C | -0.68387400 | 1.34952000  | 0.04061300  |
| C | 0.54557100  | 2.05367900  | 0.12807300  |
| C | 1.90173800  | 1.75224800  | 0.11014000  |
| C | 2.59841300  | 0.55457500  | -0.13254900 |
| C | 2.01559800  | -0.59687700 | -0.59270500 |
| H | 1.13082200  | -0.10067500 | 1.74558000  |

|   |             |             |             |
|---|-------------|-------------|-------------|
| H | 1.27582300  | -1.94182900 | 1.66107500  |
| H | -0.88170400 | -2.06871300 | 0.49408600  |
| H | -1.51619400 | 2.00987900  | -0.18565300 |
| H | 0.36830200  | 3.12654400  | 0.17802500  |
| H | 2.54416800  | 2.60802300  | 0.30652900  |
| H | 1.10242200  | -0.63253300 | -1.17135200 |
| F | 2.78692500  | -1.67704400 | -0.78181000 |
| H | 3.65854200  | 0.51002800  | 0.10555600  |
| N | -2.51880800 | -0.21029100 | -0.18754400 |
| O | -3.20895000 | 0.73417400  | -0.52750500 |
| O | -2.91567100 | -1.36250400 | -0.15136800 |

1-CHO-6-CH<sub>3</sub>-substituted

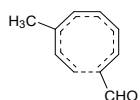

|   |             |             |             |
|---|-------------|-------------|-------------|
| C | 0.13375500  | -0.96081800 | 1.21055400  |
| C | -0.99669100 | -1.34523500 | 0.53153800  |
| C | -1.96527200 | -0.46613100 | -0.00612900 |
| C | -1.89711300 | 0.92368700  | -0.12787200 |
| C | -0.94696400 | 1.96943700  | 0.03530200  |
| C | 0.43459800  | 2.13371100  | 0.13110600  |
| C | 1.48095300  | 1.21483000  | -0.03199800 |
| C | 1.32355800  | -0.06501400 | -0.52722500 |
| H | 0.18807500  | 0.02423000  | 1.65615000  |
| H | 0.81055700  | -1.70842100 | 1.61588000  |
| H | -1.14487600 | -2.40741500 | 0.33529200  |
| H | -2.86337100 | 1.34721500  | -0.40245200 |
| H | -1.45931700 | 2.93156800  | 0.06464400  |
| H | 0.74038100  | 3.14978800  | 0.37318400  |
| H | 0.46824600  | -0.29219400 | -1.15175800 |
| C | 2.47884500  | -0.98258800 | -0.61322900 |
| H | 2.32007600  | -1.89831000 | -1.21696400 |
| O | 3.53986100  | -0.79990600 | -0.05292900 |
| H | 2.47446600  | 1.50095900  | 0.31074900  |
| C | -3.23889200 | -1.13612100 | -0.48808900 |
| H | -3.00945300 | -1.88071600 | -1.25930200 |
| H | -3.74157300 | -1.66296700 | 0.33020600  |
| H | -3.94276100 | -0.41903500 | -0.91594400 |

1-CHO-6-NH<sub>2</sub>-substituted

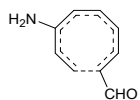

|   |             |             |             |
|---|-------------|-------------|-------------|
| C | 0.13127800  | -0.97404600 | 1.16062000  |
| C | -0.99013700 | -1.39080900 | 0.48680400  |
| C | -1.97927900 | -0.51813200 | -0.02129900 |
| C | -1.94618400 | 0.88799400  | -0.10120700 |
| C | -1.00710600 | 1.93044800  | 0.03483400  |
| C | 0.37844100  | 2.11856200  | 0.13783700  |
| C | 1.44064900  | 1.22716000  | -0.02717400 |
| C | 1.33054700  | -0.06083800 | -0.53048500 |
| H | 0.15128700  | 0.00237900  | 1.62861600  |
| H | 0.83288200  | -1.70519200 | 1.55218700  |

|   |             |             |             |
|---|-------------|-------------|-------------|
| H | -1.09887400 | -2.44494100 | 0.23557600  |
| H | -2.93653000 | 1.29314700  | -0.31324800 |
| H | -1.52952000 | 2.88708100  | 0.06795300  |
| H | 0.66021400  | 3.13789500  | 0.39314000  |
| H | 0.49948600  | -0.30836800 | -1.17945700 |
| C | 2.51922100  | -0.92667700 | -0.61006500 |
| H | 2.41517600  | -1.82793700 | -1.24731500 |
| O | 3.55650500  | -0.72644800 | -0.00853700 |
| H | 2.42605900  | 1.54068900  | 0.31635600  |
| N | -3.11803400 | -1.14363700 | -0.53253100 |
| H | -3.42206600 | -1.98083500 | -0.05299200 |
| H | -3.88850200 | -0.53884300 | -0.78398400 |

#### 1-CHO-6-OH-substituted

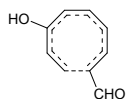

|   |             |             |             |
|---|-------------|-------------|-------------|
| C | 0.13643900  | -1.00297600 | 1.16467600  |
| C | -0.98332800 | -1.42503800 | 0.49148200  |
| C | -1.95816700 | -0.54839900 | -0.02212400 |
| C | -1.96021000 | 0.84831700  | -0.11736900 |
| C | -1.04687500 | 1.91474700  | 0.04233300  |
| C | 0.33172600  | 2.11871900  | 0.15065200  |
| C | 1.40718500  | 1.23889000  | -0.01601800 |
| C | 1.31559400  | -0.04373200 | -0.52949200 |
| H | 0.15175500  | -0.02754100 | 1.63400600  |
| H | 0.84325800  | -1.73101500 | 1.55237100  |
| H | -1.12269400 | -2.47683000 | 0.25468000  |
| H | -2.95834800 | 1.22720600  | -0.34738900 |
| H | -1.58857200 | 2.85998000  | 0.08023900  |
| H | 0.60170200  | 3.14007900  | 0.41041000  |
| H | 0.48601800  | -0.30211400 | -1.17590000 |
| C | 2.51946600  | -0.89311000 | -0.61544900 |
| H | 2.42794700  | -1.79474200 | -1.25323200 |
| O | 3.55374600  | -0.67340700 | -0.01804000 |
| H | 2.38649100  | 1.56166300  | 0.33588900  |
| O | -3.07116100 | -1.21318300 | -0.46275100 |
| H | -3.65921800 | -0.60847100 | -0.93688600 |

#### 1-CHO-6-F-substituted

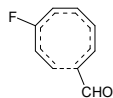

|   |             |             |             |
|---|-------------|-------------|-------------|
| C | 0.13563900  | -1.06234100 | 1.16664000  |
| C | -0.98687200 | -1.44834900 | 0.47777300  |
| C | -1.92684300 | -0.53786100 | -0.03052400 |
| C | -1.96341200 | 0.84031100  | -0.15941100 |
| C | -1.07219600 | 1.92365400  | 0.04097700  |
| C | 0.29877400  | 2.12408200  | 0.18223900  |
| C | 1.38025100  | 1.24442400  | 0.01652000  |
| C | 1.30034000  | -0.02113300 | -0.52940400 |
| H | 0.16944000  | -0.09765300 | 1.65543100  |
| H | 0.83417700  | -1.80992500 | 1.53123100  |
| H | -1.15093900 | -2.49190000 | 0.22101400  |
| H | -2.95932900 | 1.16608300  | -0.45497000 |

|   |             |             |             |
|---|-------------|-------------|-------------|
| H | -1.62422000 | 2.86248400  | 0.07396800  |
| H | 0.56764500  | 3.14138700  | 0.45912900  |
| H | 0.46869700  | -0.27593100 | -1.17523100 |
| C | 2.51067000  | -0.86530900 | -0.62650600 |
| H | 2.42590100  | -1.75532200 | -1.28063000 |
| O | 3.54057000  | -0.64733000 | -0.02327400 |
| H | 2.35314500  | 1.56133200  | 0.39060400  |
| F | -3.05190900 | -1.14519800 | -0.49601900 |

#### 1-CHO-6-CHO-substituted

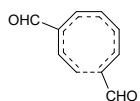

|   |             |             |             |
|---|-------------|-------------|-------------|
| C | 0.47548500  | -1.00174800 | 1.30604200  |
| C | -0.68915700 | -1.31240900 | 0.65822400  |
| C | -1.63047600 | -0.37655900 | 0.15842700  |
| C | -1.55980200 | 1.00491300  | 0.00208200  |
| C | -0.59142300 | 2.03743200  | 0.11761000  |
| C | 0.79455200  | 2.14790400  | 0.15544400  |
| C | 1.79955500  | 1.18636100  | -0.05667100 |
| C | 1.57749700  | -0.07160000 | -0.56643800 |
| H | 0.61815600  | -0.01896700 | 1.73540100  |
| H | 1.13462300  | -1.78798200 | 1.66402600  |
| H | -0.90443600 | -2.36295700 | 0.45982900  |
| H | -2.53965100 | 1.40877800  | -0.25556500 |
| H | -1.07673400 | 3.01245800  | 0.15729100  |
| H | 1.15309700  | 3.15115000  | 0.37867000  |
| H | 0.67022200  | -0.27515100 | -1.12306200 |
| C | 2.69455200  | -1.03477400 | -0.71333100 |
| H | 2.47008000  | -1.94600600 | -1.30096300 |
| O | 3.78973500  | -0.87976700 | -0.21734900 |
| H | 2.81647300  | 1.43232100  | 0.24583000  |
| C | -2.93581500 | -0.98889700 | -0.24900800 |
| H | -2.96332500 | -2.09646500 | -0.19231600 |
| O | -3.91327400 | -0.37784900 | -0.61308000 |

#### 1-CHO-6-CN-substituted

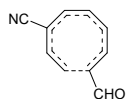

|   |             |             |             |
|---|-------------|-------------|-------------|
| C | 0.30462700  | -0.89333700 | 1.31562500  |
| C | -0.87312400 | -1.17080100 | 0.67519900  |
| C | -1.74058700 | -0.18236900 | 0.13941300  |
| C | -1.56794400 | 1.18919900  | -0.06080700 |
| C | -0.51366000 | 2.13781900  | 0.02507200  |
| C | 0.87659100  | 2.14146500  | 0.06672100  |
| C | 1.80461700  | 1.09822600  | -0.09602100 |
| C | 1.48873900  | -0.16022200 | -0.55690800 |
| H | 0.48848500  | 0.09542500  | 1.71518300  |
| H | 0.91443600  | -1.69940800 | 1.71381100  |
| H | -1.15642700 | -2.20724100 | 0.50594100  |
| H | -2.50346100 | 1.67658500  | -0.33062200 |
| H | -0.92039400 | 3.14851300  | 0.02721100  |
| H | 1.30946900  | 3.12236300  | 0.25318400  |

|   |             |             |             |
|---|-------------|-------------|-------------|
| H | 0.58130300  | -0.31113700 | -1.12997600 |
| C | 2.53627500  | -1.20642100 | -0.65869100 |
| H | 2.26180300  | -2.11125100 | -1.23410600 |
| O | 3.62636500  | -1.11675400 | -0.13734100 |
| H | 2.83510700  | 1.27686300  | 0.20804700  |
| C | -3.03816300 | -0.68317700 | -0.26476000 |
| N | -4.06935400 | -1.09699700 | -0.59128600 |

#### 1-CHO-6-NO<sub>2</sub>-substituted

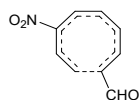

|   |             |             |             |
|---|-------------|-------------|-------------|
| C | 0.63116600  | -0.82633800 | 1.34196900  |
| C | -0.56334600 | -1.06706400 | 0.71733600  |
| C | -1.37873600 | -0.03707700 | 0.20345800  |
| C | -1.17463300 | 1.31415500  | -0.01425100 |
| C | -0.08331400 | 2.22295700  | 0.03933000  |
| C | 1.30562000  | 2.17091000  | 0.05391700  |
| C | 2.18755300  | 1.08848200  | -0.11206700 |
| C | 1.81190600  | -0.15936400 | -0.55544900 |
| H | 0.86075000  | 0.15502600  | 1.73617300  |
| H | 1.21599200  | -1.65459400 | 1.73195600  |
| H | -0.89154100 | -2.08634800 | 0.54563000  |
| H | -2.10393300 | 1.82030100  | -0.26008300 |
| H | -0.45090200 | 3.24809100  | 0.03938400  |
| H | 1.78061000  | 3.13560700  | 0.22138200  |
| H | 0.89251800  | -0.27697200 | -1.11723400 |
| C | 2.81387900  | -1.25110800 | -0.65820800 |
| H | 2.49388300  | -2.15138100 | -1.21651200 |
| O | 3.91377000  | -1.19788000 | -0.15387800 |
| H | 3.22852700  | 1.22615100  | 0.17705000  |
| N | -2.75374400 | -0.50445400 | -0.18803900 |
| O | -2.91535100 | -1.70383800 | -0.32631800 |
| O | -3.62970100 | 0.32446700  | -0.34951400 |

#### 1-CN-6-CH<sub>3</sub>-substituted

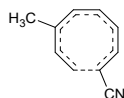

|   |             |             |             |
|---|-------------|-------------|-------------|
| C | 0.22417100  | -0.80330900 | 1.32676500  |
| C | -0.82908500 | -1.32771100 | 0.61567300  |
| C | -1.83119100 | -0.56499100 | -0.02440800 |
| C | -1.86085700 | 0.81875600  | -0.21703200 |
| C | -0.99871300 | 1.93744800  | -0.05636700 |
| C | 0.36064800  | 2.20730900  | 0.09947200  |
| C | 1.48177800  | 1.36908600  | 0.02743200  |
| C | 1.42846200  | 0.05062600  | -0.39231100 |
| H | 0.15345600  | 0.20239400  | 1.72260200  |
| H | 0.94388500  | -1.46402200 | 1.80223500  |
| H | -0.87081500 | -2.40730500 | 0.47210300  |
| H | -2.83720700 | 1.15443000  | -0.56633400 |
| H | -1.57722000 | 2.86027700  | -0.10305600 |
| H | 0.58247300  | 3.25277200  | 0.30247800  |
| H | 0.62460600  | -0.26456300 | -1.04501800 |
| C | 2.62240500  | -0.74556200 | -0.44749200 |



|   |             |             |             |
|---|-------------|-------------|-------------|
| N | 3.57273700  | -1.40871200 | -0.46874300 |
| H | 2.43090400  | 1.76077200  | 0.38654000  |
| C | -3.01564800 | -1.35939000 | -0.54170000 |
| H | -3.52296500 | -1.88611400 | 0.27363800  |
| H | -3.74681200 | -0.72331000 | -1.04531700 |
| H | -2.68126500 | -2.11792200 | -1.25885900 |

1-CN-6-NH<sub>2</sub>-substituted

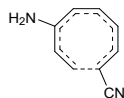

|   |             |             |             |
|---|-------------|-------------|-------------|
| C | 0.22417100  | -0.80330900 | 1.32676500  |
| C | -0.82908500 | -1.32771100 | 0.61567300  |
| C | -1.83119100 | -0.56499100 | -0.02440800 |
| C | -1.86085700 | 0.81875600  | -0.21703200 |
| C | -0.99871300 | 1.93744800  | -0.05636700 |
| C | 0.36064800  | 2.20730900  | 0.09947200  |
| C | 1.48177800  | 1.36908600  | 0.02743200  |
| C | 1.42846200  | 0.05062600  | -0.39231100 |
| H | 0.15345600  | 0.20239400  | 1.72260200  |
| H | 0.94388500  | -1.46402200 | 1.80223500  |
| H | -0.87081500 | -2.40730500 | 0.47210300  |
| H | -2.83720700 | 1.15443000  | -0.56633400 |
| H | -1.57722000 | 2.86027700  | -0.10305600 |
| H | 0.58247300  | 3.25277200  | 0.30247800  |
| H | 0.62460600  | -0.26456300 | -1.04501800 |
| C | 2.62240500  | -0.74556200 | -0.44749200 |
| N | 3.57273700  | -1.40871200 | -0.46874300 |
| H | 2.43090400  | 1.76077200  | 0.38654000  |
| C | -3.01564800 | -1.35939000 | -0.54170000 |
| H | -3.52296500 | -1.88611400 | 0.27363800  |
| H | -3.74681200 | -0.72331000 | -1.04531700 |
| H | -2.68126500 | -2.11792200 | -1.25885900 |

1-CN-6-OH-substituted

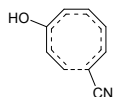

|   |             |             |             |
|---|-------------|-------------|-------------|
| C | 0.22899600  | -0.84998800 | 1.28313100  |
| C | -0.80295900 | -1.41585300 | 0.57309900  |
| C | -1.81615100 | -0.66065700 | -0.04453600 |
| C | -1.92873900 | 0.72593400  | -0.20957000 |
| C | -1.11505800 | 1.86852000  | -0.04610200 |
| C | 0.23434000  | 2.18980600  | 0.12837200  |
| C | 1.38996300  | 1.40445700  | 0.05344400  |
| C | 1.41751200  | 0.08802300  | -0.38468200 |
| H | 0.10945200  | 0.14024400  | 1.70538600  |
| H | 0.97996400  | -1.48580300 | 1.74290000  |
| H | -0.82417900 | -2.48596100 | 0.38425900  |
| H | -2.93737400 | 1.00932700  | -0.51689900 |
| H | -1.72978700 | 2.76767200  | -0.08312900 |
| H | 0.40835000  | 3.23947000  | 0.35282800  |
| H | 0.64836600  | -0.26278200 | -1.06002800 |
| C | 2.65944300  | -0.62980800 | -0.43983700 |
| N | 3.64821900  | -1.23464700 | -0.45776900 |

|   |             |             |             |
|---|-------------|-------------|-------------|
| H | 2.31552700  | 1.83996000  | 0.42442100  |
| O | -2.83455500 | -1.44058000 | -0.51954700 |
| H | -3.43550300 | -0.91756500 | -1.06888200 |

1-CN-6-F-substituted

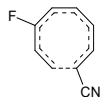

|   |             |             |             |
|---|-------------|-------------|-------------|
| C | 0.23006700  | -0.90370600 | 1.28780400  |
| C | -0.80088700 | -1.44219500 | 0.55652800  |
| C | -1.78540800 | -0.65457700 | -0.05663100 |
| C | -1.93241200 | 0.70913700  | -0.25471600 |
| C | -1.14703400 | 1.86960300  | -0.05078000 |
| C | 0.19210000  | 2.19212100  | 0.15923900  |
| C | 1.35638600  | 1.41194300  | 0.08847100  |
| C | 1.40224200  | 0.11164600  | -0.38386300 |
| H | 0.11848600  | 0.07815800  | 1.72987500  |
| H | 0.97907200  | -1.55468400 | 1.72866200  |
| H | -0.83865300 | -2.50760400 | 0.34491600  |
| H | -2.93094900 | 0.93572000  | -0.62484200 |
| H | -1.77316500 | 2.76006200  | -0.09294000 |
| H | 0.36003500  | 3.23868300  | 0.40288300  |
| H | 0.63412400  | -0.23850600 | -1.06152000 |
| C | 2.65116300  | -0.59446800 | -0.44413400 |
| N | 3.64659600  | -1.18731500 | -0.46945000 |
| H | 2.27249200  | 1.84506700  | 0.48442600  |
| F | -2.81610300 | -1.38252300 | -0.55964700 |

1-CN-6-CHO-substituted

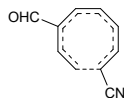

|   |             |             |             |
|---|-------------|-------------|-------------|
| C | 0.56438100  | -0.81136200 | 1.43070800  |
| C | -0.55518100 | -1.24248400 | 0.76908400  |
| C | -1.52266600 | -0.39822600 | 0.17240400  |
| C | -1.51049700 | 0.97360200  | -0.06810600 |
| C | -0.58948100 | 2.04958000  | 0.01806000  |
| C | 0.78941100  | 2.22131800  | 0.09413900  |
| C | 1.84580100  | 1.30259000  | -0.03163500 |
| C | 1.68629900  | -0.00302500 | -0.44913500 |
| H | 0.61493100  | 0.20295900  | 1.80554300  |
| H | 1.26096900  | -1.52740700 | 1.85718400  |
| H | -0.69630400 | -2.31501400 | 0.63285600  |
| H | -2.49549600 | 1.31646500  | -0.38655300 |
| H | -1.11218500 | 3.00485600  | -0.02175400 |
| H | 1.09941900  | 3.25035700  | 0.26415600  |
| H | 0.81106700  | -0.28054200 | -1.02293000 |
| C | 2.81806900  | -0.87876800 | -0.56588500 |
| N | 3.72129900  | -1.60047800 | -0.64133500 |
| H | 2.83804000  | 1.63154000  | 0.26869300  |
| C | -2.77676200 | -1.10363500 | -0.24721300 |
| H | -2.75200300 | -2.20483100 | -0.11809900 |
| O | -3.76422100 | -0.56657200 | -0.69053500 |

## 1-CN-6-CN-substituted

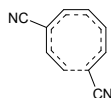

|   |             |             |             |
|---|-------------|-------------|-------------|
| C | 0.39061600  | -0.73035400 | 1.42129200  |
| C | -0.74877000 | -1.11538700 | 0.76331400  |
| C | -1.63902100 | -0.20880500 | 0.13463000  |
| C | -1.51513100 | 1.15618400  | -0.14110200 |
| C | -0.50049200 | 2.14612700  | -0.07425100 |
| C | 0.88707100  | 2.20638300  | 0.01732700  |
| C | 1.86488200  | 1.20152800  | -0.05701100 |
| C | 1.60440400  | -0.10175300 | -0.43424800 |
| H | 0.49328900  | 0.28808100  | 1.77381600  |
| H | 1.03114900  | -1.47609900 | 1.88284600  |
| H | -0.96781100 | -2.17441200 | 0.64901400  |
| H | -2.45734300 | 1.58826600  | -0.47392800 |
| H | -0.94088600 | 3.13933200  | -0.15184900 |
| H | 1.27715000  | 3.21188800  | 0.15882700  |
| H | 0.72869400  | -0.32370500 | -1.03113900 |
| C | 2.66518100  | -1.06792800 | -0.50041500 |
| N | 3.50910800  | -1.86083900 | -0.53299200 |
| H | 2.87582800  | 1.45777100  | 0.25159300  |
| C | -2.89621100 | -0.79088200 | -0.28759200 |
| N | -3.89699900 | -1.26513200 | -0.62570000 |

1-CN-6-NO<sub>2</sub>-substituted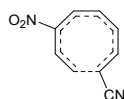

|   |             |             |             |
|---|-------------|-------------|-------------|
| C | 0.71281600  | -0.67963800 | 1.43802800  |
| C | -0.45693900 | -1.00304600 | 0.79935100  |
| C | -1.28712800 | -0.03228800 | 0.20630800  |
| C | -1.11066000 | 1.31357400  | -0.06991300 |
| C | -0.04229100 | 2.24684200  | -0.02159400 |
| C | 1.34750400  | 2.22876700  | 0.03704400  |
| C | 2.26473700  | 1.17011700  | -0.06279100 |
| C | 1.91845600  | -0.11314900 | -0.43939700 |
| H | 0.87806800  | 0.32779300  | 1.79846300  |
| H | 1.32158100  | -1.46351700 | 1.87875500  |
| H | -0.73871900 | -2.04235200 | 0.67190000  |
| H | -2.04180300 | 1.78423600  | -0.37262400 |
| H | -0.42964900 | 3.26275800  | -0.08154300 |
| H | 1.79622100  | 3.21019700  | 0.17380300  |
| H | 1.01990800  | -0.27768500 | -1.02093500 |
| C | 2.91838100  | -1.14066200 | -0.53303300 |
| N | 3.71415100  | -1.98041800 | -0.58901600 |
| H | 3.29498800  | 1.36499500  | 0.22599800  |
| N | -2.63374200 | -0.56170800 | -0.20728800 |
| O | -3.50036500 | 0.23074100  | -0.52601600 |
| O | -2.78122400 | -1.77007200 | -0.20194700 |

1-NO<sub>2</sub>-6-CH<sub>3</sub>-substituted

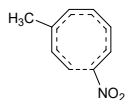

|   |             |             |             |
|---|-------------|-------------|-------------|
| C | -0.06500300 | -0.62310100 | 1.43684300  |
| C | -1.06533000 | -1.24931100 | 0.74226200  |
| C | -2.10465200 | -0.58723700 | 0.04009200  |
| C | -2.21094100 | 0.77099100  | -0.25388900 |
| C | -1.41473500 | 1.95043500  | -0.17067900 |
| C | -0.07652600 | 2.30799900  | -0.04162800 |
| C | 1.09117100  | 1.52570700  | -0.04137200 |
| C | 1.09985100  | 0.19357900  | -0.36204800 |
| H | -0.18464500 | 0.40671500  | 1.75136900  |
| H | 0.69386500  | -1.20434500 | 1.95483000  |
| H | -1.03820600 | -2.33551200 | 0.66082200  |
| H | -3.19954900 | 1.02327800  | -0.63712800 |
| H | -2.04727000 | 2.83185400  | -0.27852700 |
| H | 0.08853300  | 3.37645500  | 0.07571500  |
| H | 0.38413000  | -0.27715800 | -1.01719600 |
| N | 2.35163300  | -0.54537500 | -0.30953300 |
| O | 2.38404700  | -1.60034900 | -0.92550800 |
| O | 3.26984600  | -0.09886200 | 0.36097900  |
| H | 2.02280100  | 1.97182900  | 0.29796100  |
| C | -3.23140800 | -1.48706200 | -0.42850900 |
| H | -3.70001100 | -2.00315800 | 0.41621600  |
| H | -4.00462500 | -0.93245700 | -0.96419000 |
| H | -2.84215200 | -2.25819100 | -1.10334200 |

#### 1-NO<sub>2</sub>-6-NH<sub>2</sub>-substituted

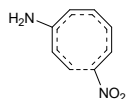

|   |             |             |             |
|---|-------------|-------------|-------------|
| C | -0.07805800 | -0.66703300 | 1.37387900  |
| C | -1.06685400 | -1.31195500 | 0.68328200  |
| C | -2.12952000 | -0.64395400 | 0.02133800  |
| C | -2.27052600 | 0.73689800  | -0.21856600 |
| C | -1.47481000 | 1.89945900  | -0.16136600 |
| C | -0.13279700 | 2.27648100  | -0.02521100 |
| C | 1.04682000  | 1.52548300  | -0.03538500 |
| C | 1.11171600  | 0.19059200  | -0.36692400 |
| H | -0.22574200 | 0.35054700  | 1.71628800  |
| H | 0.70352400  | -1.23730500 | 1.86895200  |
| H | -1.00148600 | -2.38883800 | 0.53854400  |
| H | -3.28737500 | 0.98341500  | -0.52543700 |
| H | -2.11099700 | 2.77924800  | -0.26146800 |
| H | 0.00830700  | 3.34573500  | 0.11088600  |
| H | 0.43157500  | -0.29931000 | -1.04519200 |
| N | 2.38539300  | -0.49304600 | -0.29838700 |
| O | 2.46996600  | -1.55438200 | -0.90310400 |
| O | 3.27973700  | -0.01006200 | 0.38342400  |
| H | 1.96583100  | 1.99989400  | 0.30141400  |
| N | -3.13337800 | -1.46535800 | -0.46695700 |
| H | -3.32425700 | -2.32064300 | 0.03635100  |
| H | -3.95693600 | -1.02418800 | -0.85176100 |

#### 1-NO<sub>2</sub>-6-OH-substituted

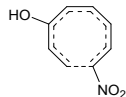

|   |             |             |             |
|---|-------------|-------------|-------------|
| C | -0.07226100 | -0.69372500 | 1.38632500  |
| C | -1.05682900 | -1.34592800 | 0.69499400  |
| C | -2.10238600 | -0.67572200 | 0.02185600  |
| C | -2.27531200 | 0.68652900  | -0.24120500 |
| C | -1.51312200 | 1.87583200  | -0.15940000 |
| C | -0.18246400 | 2.26960500  | -0.01562900 |
| C | 1.00945100  | 1.53113700  | -0.02223400 |
| C | 1.09221300  | 0.20245400  | -0.36175400 |
| H | -0.22837100 | 0.32234400  | 1.72831500  |
| H | 0.71176700  | -1.25847100 | 1.88360200  |
| H | -1.02227500 | -2.42413300 | 0.56422500  |
| H | -3.29290600 | 0.90206400  | -0.57274600 |
| H | -2.16925700 | 2.74072100  | -0.25620800 |
| H | -0.05429100 | 3.34007300  | 0.12378600  |
| H | 0.41840000  | -0.29711200 | -1.03940200 |
| N | 2.38164200  | -0.46282000 | -0.30215400 |
| O | 2.48166400  | -1.51150300 | -0.92284000 |
| O | 3.26619000  | 0.02889700  | 0.38354900  |
| H | 1.91954100  | 2.01436400  | 0.32567500  |
| O | -3.07831300 | -1.53271700 | -0.39617100 |
| H | -3.70617600 | -1.07861300 | -0.97618100 |

#### 1-NO<sub>2</sub>-6-F-substituted

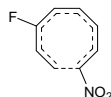

|   |             |             |             |
|---|-------------|-------------|-------------|
| C | -0.06383500 | -0.75198600 | 1.39341200  |
| C | -1.05137700 | -1.37580800 | 0.68030100  |
| C | -2.06856700 | -0.66991900 | 0.01095800  |
| C | -2.27287700 | 0.66504600  | -0.28465000 |
| C | -1.54091200 | 1.87522200  | -0.16328500 |
| C | -0.22104000 | 2.27236000  | 0.01464300  |
| C | 0.97818200  | 1.53698100  | 0.01252600  |
| C | 1.07436900  | 0.22241300  | -0.36075700 |
| H | -0.21087300 | 0.25627200  | 1.76010400  |
| H | 0.71709600  | -1.33604200 | 1.87267400  |
| H | -1.03493600 | -2.45139700 | 0.52571600  |
| H | -3.27651800 | 0.81961600  | -0.67692800 |
| H | -2.20926600 | 2.72972400  | -0.26333200 |
| H | -0.09764300 | 3.34083800  | 0.17351900  |
| H | 0.40199900  | -0.27296900 | -1.04366500 |
| N | 2.37064700  | -0.43803300 | -0.30719500 |
| O | 2.47532800  | -1.47552000 | -0.94331200 |
| O | 3.24987100  | 0.05076100  | 0.38550100  |
| H | 1.87924200  | 2.01619500  | 0.38813900  |
| F | -3.06321000 | -1.47597700 | -0.43803000 |

#### 1-NO<sub>2</sub>-6-CHO-substituted

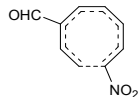

|   |             |             |             |
|---|-------------|-------------|-------------|
| C | 0.26736800  | -0.58786600 | 1.55926800  |
| C | -0.80437000 | -1.12212800 | 0.90171700  |
| C | -1.80483100 | -0.37381600 | 0.22669900  |
| C | -1.86208300 | 0.96924200  | -0.12238900 |
| C | -1.00368900 | 2.10495800  | -0.10769700 |
| C | 0.35881300  | 2.35834600  | -0.04252400 |
| C | 1.46326300  | 1.48245400  | -0.07874600 |
| C | 1.35689100  | 0.15801300  | -0.39159100 |
| H | 0.26660100  | 0.45480000  | 1.85227000  |
| H | 0.99671000  | -1.23263700 | 2.04284000  |
| H | -0.88113100 | -2.20718000 | 0.83155200  |
| H | -2.85687400 | 1.22971200  | -0.48591600 |
| H | -1.58122800 | 3.02241200  | -0.21762500 |
| H | 0.61506800  | 3.41215800  | 0.03981500  |
| H | 0.55880900  | -0.27438400 | -0.97518700 |
| N | 2.54996100  | -0.68088000 | -0.39302500 |
| O | 2.45504400  | -1.74814700 | -0.97757700 |
| O | 3.54151500  | -0.28957600 | 0.20054600  |
| H | 2.44052000  | 1.85817000  | 0.21422600  |
| C | -3.01403000 | -1.17730300 | -0.15586300 |
| H | -2.92827700 | -2.26447100 | 0.04359600  |
| O | -4.02454800 | -0.72525400 | -0.63892300 |

1-NO<sub>2</sub>-6-CN-substituted

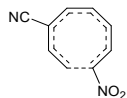

|   |             |             |             |
|---|-------------|-------------|-------------|
| C | 0.11418800  | -0.51087500 | 1.51725300  |
| C | -0.97470500 | -1.01309700 | 0.86198400  |
| C | -1.92208600 | -0.20770300 | 0.17118300  |
| C | -1.89174500 | 1.13683700  | -0.19499300 |
| C | -0.95048900 | 2.20528500  | -0.18760100 |
| C | 0.42465100  | 2.37167500  | -0.10675300 |
| C | 1.47202900  | 1.42978900  | -0.10169500 |
| C | 1.29277700  | 0.10686800  | -0.39293100 |
| H | 0.14801600  | 0.53412000  | 1.80016800  |
| H | 0.80662000  | -1.17908000 | 2.02236300  |
| H | -1.11184100 | -2.08987400 | 0.79884800  |
| H | -2.85703100 | 1.47785500  | -0.56490500 |
| H | -1.46376700 | 3.15666500  | -0.32091000 |
| H | 0.74406600  | 3.40894600  | -0.03902000 |
| H | 0.49543300  | -0.28611000 | -1.00520000 |
| N | 2.43644000  | -0.79922000 | -0.34162100 |
| O | 2.30117700  | -1.86736800 | -0.91474300 |
| O | 3.42526200  | -0.45456500 | 0.28417700  |
| H | 2.46305800  | 1.75010300  | 0.21005600  |
| C | -3.13377600 | -0.90344300 | -0.21126300 |
| N | -4.09660100 | -1.47066100 | -0.51380400 |

1-NO<sub>2</sub>-6-NO<sub>2</sub>-substituted

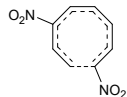

|   |             |             |             |
|---|-------------|-------------|-------------|
| C | 0.43355500  | -0.45591000 | 1.52476600  |
| C | -0.69058500 | -0.89260700 | 0.88131900  |
| C | -1.58264700 | -0.01075000 | 0.23057800  |
| C | -1.49989100 | 1.31968400  | -0.12841000 |
| C | -0.50129100 | 2.33588000  | -0.13150400 |
| C | 0.88120900  | 2.42230000  | -0.07618000 |
| C | 1.87320400  | 1.42139400  | -0.09571800 |
| C | 1.61552200  | 0.11405000  | -0.39542700 |
| H | 0.53194900  | 0.58025200  | 1.82404000  |
| H | 1.09795100  | -1.16980700 | 2.00417400  |
| H | -0.89198800 | -1.95452600 | 0.79352600  |
| H | -2.45837100 | 1.70111000  | -0.46928800 |
| H | -0.96421600 | 3.31470600  | -0.24616900 |
| H | 1.26114000  | 3.43887300  | -0.00668900 |
| H | 0.79271700  | -0.22963400 | -1.00366400 |
| N | 2.71017200  | -0.85433300 | -0.36538400 |
| O | 2.51172700  | -1.90672400 | -0.94776700 |
| O | 3.72158000  | -0.56823200 | 0.25315500  |
| H | 2.88506800  | 1.68172900  | 0.20478300  |
| N | -2.88908700 | -0.65630500 | -0.15380500 |
| O | -2.93378800 | -1.87166200 | -0.12541500 |
| O | -3.82155600 | 0.05755700  | -0.47033800 |

### 5.3.7 1,7-substituted

1-CH<sub>3</sub>-7-CH<sub>3</sub>-substituted

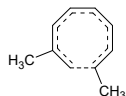

|   |             |             |             |
|---|-------------|-------------|-------------|
| C | 0.73381300  | 0.33319500  | 1.18533800  |
| C | 1.50764300  | -0.40983400 | 0.32829600  |
| C | 1.00513900  | -1.58863000 | -0.28157400 |
| C | -0.28554200 | -2.08368000 | -0.37842200 |
| C | -1.61003400 | -1.64293100 | -0.07396900 |
| C | -2.25364800 | -0.44192800 | 0.19044600  |
| C | -1.79697200 | 0.89290400  | 0.14044500  |
| C | -0.60036000 | 1.29322000  | -0.40974700 |
| H | -0.13130900 | -0.11973800 | 1.65192400  |
| H | 1.14159900  | 1.21788000  | 1.67017400  |
| H | 1.75893300  | -2.21695400 | -0.75762700 |
| H | -0.30200600 | -3.10051400 | -0.77217100 |
| H | -2.30480200 | -2.48279800 | -0.08454700 |
| H | -3.29511300 | -0.55701400 | 0.48800600  |
| H | -0.13583900 | 0.61890000  | -1.12276700 |
| C | -0.18770700 | 2.73625100  | -0.49458500 |
| H | -0.63305300 | 3.32390400  | 0.31432100  |
| H | 0.90051700  | 2.84398800  | -0.44157100 |
| H | -0.51203800 | 3.17083400  | -1.44855300 |
| H | -2.41671300 | 1.64474800  | 0.63086700  |
| C | 2.86573200  | 0.08356100  | -0.11083500 |
| H | 3.58932600  | -0.73836900 | -0.14296000 |
| H | 2.82003400  | 0.51019600  | -1.12180600 |
| H | 3.25208100  | 0.85216000  | 0.56435300  |

1-CH<sub>3</sub>-7-NH<sub>2</sub>-substituted

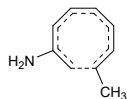

|   |             |             |             |
|---|-------------|-------------|-------------|
| C | 0.76302400  | 0.39422700  | 1.20951800  |
| C | 1.54788400  | -0.28058500 | 0.31369800  |
| C | 1.13273400  | -1.50907200 | -0.28607900 |
| C | -0.11462700 | -2.08855800 | -0.37590200 |
| C | -1.47183800 | -1.75155200 | -0.05654200 |
| C | -2.20267000 | -0.60438000 | 0.19618200  |
| C | -1.85536200 | 0.76779100  | 0.13557200  |
| C | -0.70453000 | 1.25712700  | -0.42662900 |
| H | -0.04870700 | -0.12841200 | 1.69589600  |
| H | 1.10350200  | 1.32509400  | 1.65707800  |
| H | 1.93414100  | -2.08621100 | -0.74884500 |
| H | -0.05704000 | -3.10399700 | -0.76949800 |
| H | -2.09445400 | -2.64575500 | -0.04654200 |
| H | -3.23254800 | -0.79878900 | 0.49419800  |
| H | -0.16729600 | 0.61648100  | -1.11922900 |
| C | -0.38047800 | 2.72099200  | -0.50254600 |
| H | -0.87517800 | 3.28028300  | 0.29768400  |
| H | 0.69953300  | 2.88538300  | -0.43438000 |
| H | -0.71117400 | 3.13538000  | -1.46343200 |
| H | -2.53207400 | 1.46861000  | 0.62573700  |
| N | 2.72964200  | 0.30717000  | -0.17188100 |
| H | 3.29866700  | 0.76105000  | 0.53256900  |
| H | 3.29032000  | -0.29524900 | -0.76169900 |

1-CH<sub>3</sub>-7-OH-substituted

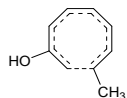

|   |             |             |             |
|---|-------------|-------------|-------------|
| C | 0.71550200  | 0.52583100  | 1.15588500  |
| C | 1.57886300  | -0.09067200 | 0.28841900  |
| C | 1.32834100  | -1.34070600 | -0.32780500 |
| C | 0.16300300  | -2.08072200 | -0.39440700 |
| C | -1.21269600 | -1.92358800 | -0.04136200 |
| C | -2.08446800 | -0.87955100 | 0.23589500  |
| C | -1.92764900 | 0.52126900  | 0.16033700  |
| C | -0.85173900 | 1.15738500  | -0.41566700 |
| H | -0.02412800 | -0.08082900 | 1.65905000  |
| H | 0.96866100  | 1.48027000  | 1.61360900  |
| H | 2.19811900  | -1.77627300 | -0.81468200 |
| H | 0.34395000  | -3.07798100 | -0.79628700 |
| H | -1.71562600 | -2.89019100 | -0.02233600 |
| H | -3.06874400 | -1.20947100 | 0.56608000  |
| H | -0.26292200 | 0.59037000  | -1.13010300 |
| C | -0.75616800 | 2.65318000  | -0.52443100 |
| H | -1.28285300 | 3.14699700  | 0.29805200  |
| H | 0.28622700  | 2.98688400  | -0.52326700 |
| H | -1.20216000 | 2.99462500  | -1.46705700 |
| H | -2.68594000 | 1.12940500  | 0.65465100  |
| O | 2.71997600  | 0.52686900  | -0.16308600 |
| H | 2.96767400  | 1.23669300  | 0.44579700  |



1-CH<sub>3</sub>-7-F-substituted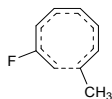

|   |             |             |             |
|---|-------------|-------------|-------------|
| C | -0.57522000 | -0.72102700 | 1.15460000  |
| C | -1.53677200 | -0.26878500 | 0.29968600  |
| C | -1.60946000 | 0.98301900  | -0.33585800 |
| C | -0.65907200 | 1.98788300  | -0.40149400 |
| C | 0.71032000  | 2.15359700  | -0.04451200 |
| C | 1.79675300  | 1.33614200  | 0.24459700  |
| C | 1.97508600  | -0.06059100 | 0.16850700  |
| C | 1.09539500  | -0.94263600 | -0.41984400 |
| H | 0.02462300  | 0.00954600  | 1.67743000  |
| H | -0.66068800 | -1.71649300 | 1.57880500  |
| H | -2.55959000 | 1.18313000  | -0.82566200 |
| H | -1.07306300 | 2.91240900  | -0.80346700 |
| H | 0.97950600  | 3.20932200  | -0.02931600 |
| H | 2.67443700  | 1.88502200  | 0.58373700  |
| H | 0.39272700  | -0.53618500 | -1.14035500 |
| C | 1.37644900  | -2.41469000 | -0.52871200 |
| H | 2.00133300  | -2.76175100 | 0.29986800  |
| H | 0.45090300  | -2.99768900 | -0.53714200 |
| H | 1.90440500  | -2.62986600 | -1.46627900 |
| H | 2.85338900  | -0.46948200 | 0.66930700  |
| F | -2.49209600 | -1.15616000 | -0.09208200 |

1-CH<sub>3</sub>-7-CHO-substituted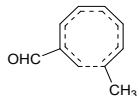

|   |             |             |             |
|---|-------------|-------------|-------------|
| C | 0.58897200  | 0.08039300  | 1.19732600  |
| C | 1.03100800  | -0.85858200 | 0.30469800  |
| C | 0.20707700  | -1.83981300 | -0.32114000 |
| C | -1.16291300 | -1.93375700 | -0.41292900 |
| C | -2.28995800 | -1.12559100 | -0.03733000 |
| C | -2.52753100 | 0.20197100  | 0.25176700  |
| C | -1.69107500 | 1.35081200  | 0.17895600  |
| C | -0.48543600 | 1.41707100  | -0.46383400 |
| H | -0.35823800 | -0.05017300 | 1.70248800  |
| H | 1.29531100  | 0.79748100  | 1.60827900  |
| H | 0.75096300  | -2.64625900 | -0.81453600 |
| H | -1.48939700 | -2.87811500 | -0.84846000 |
| H | -3.20093800 | -1.72338600 | -0.01270800 |
| H | -3.54169100 | 0.40552200  | 0.59254500  |
| H | -0.24278000 | 0.61735200  | -1.15735900 |
| C | 0.34195800  | 2.66436500  | -0.56359000 |
| H | 0.07180800  | 3.38443900  | 0.21481500  |
| H | 1.40907200  | 2.43560700  | -0.47674200 |
| H | 0.18989700  | 3.14201600  | -1.53950300 |
| H | -2.03648700 | 2.23733000  | 0.71266300  |
| C | 2.44772700  | -0.79852900 | -0.13464600 |
| H | 2.80187600  | -1.67537300 | -0.71542800 |
| O | 3.19895300  | 0.12544000  | 0.09228500  |

1-CH<sub>3</sub>-7-CN-substituted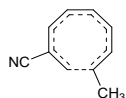

|   |             |             |             |
|---|-------------|-------------|-------------|
| C | 0.51975800  | 0.26139900  | 1.23600400  |
| C | 1.21452000  | -0.56659300 | 0.38790400  |
| C | 0.64497600  | -1.68511100 | -0.28611100 |
| C | -0.67792400 | -2.05306000 | -0.41910600 |
| C | -1.96173100 | -1.50175200 | -0.10170100 |
| C | -2.49197600 | -0.25451400 | 0.17471800  |
| C | -1.91599300 | 1.03978000  | 0.13747700  |
| C | -0.70346400 | 1.34868900  | -0.42610900 |
| H | -0.39811000 | -0.10055500 | 1.67836500  |
| H | 1.01502100  | 1.09801600  | 1.71948900  |
| H | 1.36181900  | -2.35505900 | -0.75550400 |
| H | -0.78134300 | -3.04626300 | -0.85533200 |
| H | -2.72715900 | -2.27725900 | -0.12347200 |
| H | -3.54054700 | -0.27566000 | 0.46732300  |
| H | -0.27824300 | 0.62745400  | -1.11764500 |
| C | -0.16404400 | 2.74725700  | -0.50652800 |
| H | -0.56814500 | 3.37769800  | 0.29126500  |
| H | 0.92854000  | 2.75704100  | -0.44364400 |
| H | -0.43457200 | 3.19949600  | -1.46875900 |
| H | -2.46920800 | 1.83591200  | 0.63710200  |
| C | 2.57544000  | -0.21991600 | 0.05332500  |
| N | 3.66493900  | 0.06601400  | -0.21834600 |

1-CH<sub>3</sub>-7-NO<sub>2</sub>-substituted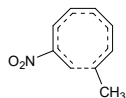

|   |             |             |             |
|---|-------------|-------------|-------------|
| C | 0.19533200  | 0.34104100  | 1.22242700  |
| C | 0.90544200  | -0.49726800 | 0.41429500  |
| C | 0.42941100  | -1.67215100 | -0.21599900 |
| C | -0.87245700 | -2.10637900 | -0.34139700 |
| C | -2.18185300 | -1.60236700 | -0.04412800 |
| C | -2.77019000 | -0.37253400 | 0.18224000  |
| C | -2.25925700 | 0.94885000  | 0.09545600  |
| C | -1.07170900 | 1.30507300  | -0.49027300 |
| H | -0.69749500 | -0.05085900 | 1.68917000  |
| H | 0.65634900  | 1.22692800  | 1.64360700  |
| H | 1.19326500  | -2.31366000 | -0.64324900 |
| H | -0.92795500 | -3.11920000 | -0.73889100 |
| H | -2.90930300 | -2.41361100 | -0.03013000 |
| H | -3.81664500 | -0.43222000 | 0.47711000  |
| H | -0.60932900 | 0.58244600  | -1.15701400 |
| C | -0.59538400 | 2.72273300  | -0.60925300 |
| H | -1.06369800 | 3.36483900  | 0.14279800  |
| H | 0.49193200  | 2.78300300  | -0.49840500 |
| H | -0.84347100 | 3.12008400  | -1.60125500 |
| H | -2.85026700 | 1.73138300  | 0.57300400  |
| N | 2.27337600  | -0.06838100 | 0.04767100  |
| O | 3.01931900  | -0.89457700 | -0.44693000 |
| O | 2.57905300  | 1.09427000  | 0.26309800  |

1- NH<sub>2</sub>-7-CH<sub>3</sub>-substituted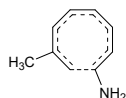

|   |             |             |             |
|---|-------------|-------------|-------------|
| C | 0.68516200  | 0.35026100  | 1.16363000  |
| C | 1.49395200  | -0.40285800 | 0.33185700  |
| C | 1.01069800  | -1.56922500 | -0.29228400 |
| C | -0.28712700 | -2.07764800 | -0.36746800 |
| C | -1.59599000 | -1.63281600 | -0.06222000 |
| C | -2.22792900 | -0.41086700 | 0.20030400  |
| C | -1.78410300 | 0.90861800  | 0.11686100  |
| C | -0.55388300 | 1.30369900  | -0.41391000 |
| H | -0.15874600 | -0.12687100 | 1.64494600  |
| H | 1.09156700  | 1.22863600  | 1.66254500  |
| H | 1.76333100  | -2.18452900 | -0.78569900 |
| H | -0.30167200 | -3.10098200 | -0.74479100 |
| H | -2.30583800 | -2.45928400 | -0.07742000 |
| H | -3.26639500 | -0.51535700 | 0.51099800  |
| H | -0.08041900 | 0.65221400  | -1.14001700 |
| N | -0.23982000 | 2.64809400  | -0.57464400 |
| H | -0.59345600 | 3.26304000  | 0.14901200  |
| H | 0.73099600  | 2.84127400  | -0.78587700 |
| H | -2.42940000 | 1.68482300  | 0.52818000  |
| C | 2.85702500  | 0.10835300  | -0.07238800 |
| H | 3.57161100  | -0.71513500 | -0.17361500 |
| H | 2.81446800  | 0.61125400  | -1.04910600 |
| H | 3.25586700  | 0.81916200  | 0.65706300  |

1- NH<sub>2</sub>-7-NH<sub>2</sub>-substituted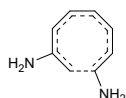

|   |             |             |             |
|---|-------------|-------------|-------------|
| C | 0.72847900  | 0.30790500  | 1.20803200  |
| C | 1.47617400  | -0.44406200 | 0.33052100  |
| C | 0.95527000  | -1.60598400 | -0.29340800 |
| C | -0.35874500 | -2.04763400 | -0.37243100 |
| C | -1.65343600 | -1.55108100 | -0.05755000 |
| C | -2.23283300 | -0.30683200 | 0.20184500  |
| C | -1.73427700 | 0.99745300  | 0.11658700  |
| C | -0.49454400 | 1.31731600  | -0.43068100 |
| H | -0.11001700 | -0.15811500 | 1.70764000  |
| H | 1.15407400  | 1.19802700  | 1.66660600  |
| H | 1.68965100  | -2.25396500 | -0.77212400 |
| H | -0.41784400 | -3.06720600 | -0.75595300 |
| H | -2.39195400 | -2.35172900 | -0.06399700 |
| H | -3.27529900 | -0.36888200 | 0.51184400  |
| H | -0.04416400 | 0.62018100  | -1.12773800 |
| N | -0.06393100 | 2.61923800  | -0.59695100 |
| H | -0.37315000 | 3.28114000  | 0.10461900  |
| H | 0.91907900  | 2.71759200  | -0.81875300 |
| H | -2.33858700 | 1.80394200  | 0.53037100  |
| N | 2.71216600  | 0.05989200  | -0.12648100 |
| H | 3.32438200  | 0.39101300  | 0.61085200  |
| H | 3.20965300  | -0.56839200 | -0.74682800 |

1- NH<sub>2</sub>-7-OH-substituted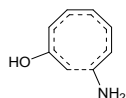

|   |             |             |             |
|---|-------------|-------------|-------------|
| C | 0.67017400  | 0.49628400  | 1.18781900  |
| C | 1.54241500  | -0.12325400 | 0.32779400  |
| C | 1.29275900  | -1.36360400 | -0.29645600 |
| C | 0.10494000  | -2.08316800 | -0.36998800 |
| C | -1.26093600 | -1.87050100 | -0.05695200 |
| C | -2.09157500 | -0.77495900 | 0.20440900  |
| C | -1.89463800 | 0.60432400  | 0.11644100  |
| C | -0.76268700 | 1.21084200  | -0.42817100 |
| H | -0.06853500 | -0.11066600 | 1.69199600  |
| H | 0.95546800  | 1.44109600  | 1.64127800  |
| H | 2.15575700  | -1.84070500 | -0.76238500 |
| H | 0.26838700  | -3.09460100 | -0.74374900 |
| H | -1.81508400 | -2.80793000 | -0.06100300 |
| H | -3.09384800 | -1.06083300 | 0.52078500  |
| H | -0.16978000 | 0.64911400  | -1.14038600 |
| N | -0.67217600 | 2.58156800  | -0.58402900 |
| H | -1.13460000 | 3.13516100  | 0.12729600  |
| H | 0.25168000  | 2.93348700  | -0.80101100 |
| H | -2.66576300 | 1.25271100  | 0.53119800  |
| O | 2.66642400  | 0.58650600  | -0.02919500 |
| H | 3.08744300  | 0.16435700  | -0.79162600 |

1- NH<sub>2</sub>-7-F-substituted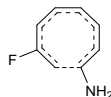

|   |             |             |             |
|---|-------------|-------------|-------------|
| C | -0.58266000 | -0.64337900 | 1.14166900  |
| C | -1.53547600 | -0.11195400 | 0.30689600  |
| C | -1.50520100 | 1.12120800  | -0.34296700 |
| C | -0.45683100 | 2.04240200  | -0.38655900 |
| C | 0.91072200  | 2.05675300  | -0.04037900 |
| C | 1.90685700  | 1.10833400  | 0.24313000  |
| C | 1.95026400  | -0.27850900 | 0.13836800  |
| C | 0.94808400  | -1.07874300 | -0.42475300 |
| H | 0.05034900  | 0.04912100  | 1.67865500  |
| H | -0.75756900 | -1.61951500 | 1.58424900  |
| H | -2.42687700 | 1.40341400  | -0.84538100 |
| H | -0.78310300 | 3.01200900  | -0.76294600 |
| H | 1.30656700  | 3.07131700  | -0.03266800 |
| H | 2.83729700  | 1.55422700  | 0.59159500  |
| H | 0.28637400  | -0.63166100 | -1.15768800 |
| N | 1.13213300  | -2.43833800 | -0.59676700 |
| H | 1.67548700  | -2.90731500 | 0.11780600  |
| H | 0.31080700  | -2.96451700 | -0.86519600 |
| H | 2.81828700  | -0.78594100 | 0.55863900  |
| F | -2.56190000 | -0.93438200 | -0.05579200 |

1- NH<sub>2</sub>-7-CHO-substituted

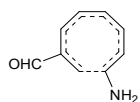

|   |             |             |             |
|---|-------------|-------------|-------------|
| C | 0.27220300  | 0.50696400  | 1.20867100  |
| C | 1.20417300  | -0.18699500 | 0.44494300  |
| C | 0.93631800  | -1.39809700 | -0.21604900 |
| C | -0.26839900 | -2.08318400 | -0.35653800 |
| C | -1.63435200 | -1.82805900 | -0.08261800 |
| C | -2.43308600 | -0.70596600 | 0.16294600  |
| C | -2.17145400 | 0.66186200  | 0.07482500  |
| C | -0.99986100 | 1.22232200  | -0.44177400 |
| H | -0.51857100 | -0.04333900 | 1.69976200  |
| H | 0.57288800  | 1.43984600  | 1.68619400  |
| H | 1.80584600  | -1.87327100 | -0.66589400 |
| H | -0.12715300 | -3.08779800 | -0.75547800 |
| H | -2.22279600 | -2.74429500 | -0.11715500 |
| H | -3.45369500 | -0.94922100 | 0.45277300  |
| H | -0.41151600 | 0.62117400  | -1.12598100 |
| N | -0.88349300 | 2.58726700  | -0.64705100 |
| H | -1.35275200 | 3.18110500  | 0.02601500  |
| H | 0.04329100  | 2.92275700  | -0.87544500 |
| H | -2.92738100 | 1.34430700  | 0.46338600  |
| C | 2.52191500  | 0.45463100  | 0.22711000  |
| H | 2.62821700  | 1.45865600  | 0.69459500  |
| O | 3.44791600  | -0.03020900 | -0.38531300 |

#### 1-NH<sub>2</sub>-7-CN-substituted

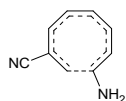

|   |             |             |             |
|---|-------------|-------------|-------------|
| C | 0.46383100  | 0.26502000  | 1.20836900  |
| C | 1.17315000  | -0.60422500 | 0.39040500  |
| C | 0.59128600  | -1.69229600 | -0.29114100 |
| C | -0.75659900 | -2.02885000 | -0.40069900 |
| C | -2.00025200 | -1.42330400 | -0.09937600 |
| C | -2.46812000 | -0.13424000 | 0.18157200  |
| C | -1.85253600 | 1.11604900  | 0.11908300  |
| C | -0.58482300 | 1.35414500  | -0.42128700 |
| H | -0.43476600 | -0.10861400 | 1.68034700  |
| H | 0.98318200  | 1.07753300  | 1.70833400  |
| H | 1.28491900  | -2.37392500 | -0.77749000 |
| H | -0.89329500 | -3.02978700 | -0.80960500 |
| H | -2.81181600 | -2.14862300 | -0.14120800 |
| H | -3.51256700 | -0.10503300 | 0.48667600  |
| H | -0.19097100 | 0.63159500  | -1.12722000 |
| N | -0.08942900 | 2.62921700  | -0.58918200 |
| H | -0.36823800 | 3.32106500  | 0.09551000  |
| H | 0.88632400  | 2.70076300  | -0.84761300 |
| H | -2.39058300 | 1.96554000  | 0.53937900  |
| C | 2.54206400  | -0.27211000 | 0.07686400  |
| N | 3.63225900  | 0.02626100  | -0.18079600 |

#### 1-NH<sub>2</sub>-7-NO<sub>2</sub>-substituted

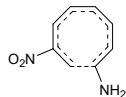

|   |             |             |             |
|---|-------------|-------------|-------------|
| C | 0.13484900  | 0.31655900  | 1.22933700  |
| C | 0.85840900  | -0.54846600 | 0.44081800  |
| C | 0.37870200  | -1.69581700 | -0.20775700 |
| C | -0.94797400 | -2.09018800 | -0.34218000 |
| C | -2.22087000 | -1.51602400 | -0.09494500 |
| C | -2.73903000 | -0.23816300 | 0.13482500  |
| C | -2.17145800 | 1.03823200  | 0.06914200  |
| C | -0.90977200 | 1.33217600  | -0.45328300 |
| H | -0.73660000 | -0.08913200 | 1.72515700  |
| H | 0.61879200  | 1.18116300  | 1.66937600  |
| H | 1.12971200  | -2.34772400 | -0.64302900 |
| H | -1.03709200 | -3.10723100 | -0.72273400 |
| H | -3.00602600 | -2.26983200 | -0.13494600 |
| H | -3.79271500 | -0.24040400 | 0.40836600  |
| H | -0.46400800 | 0.61854700  | -1.13752700 |
| N | -0.44079100 | 2.61480200  | -0.60241700 |
| H | -0.78395900 | 3.30079900  | 0.05923100  |
| H | 0.55698400  | 2.69167100  | -0.76620400 |
| H | -2.75428100 | 1.86628300  | 0.47255800  |
| N | 2.20828700  | -0.10598900 | 0.05063800  |
| O | 3.03307200  | -0.94738600 | -0.25019600 |
| O | 2.41687500  | 1.10292500  | 0.03475400  |

#### 1-OH-7-CH<sub>3</sub>-substituted

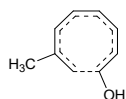

|   |             |             |             |
|---|-------------|-------------|-------------|
| C | -0.68748600 | -0.41058600 | 1.16076900  |
| C | -1.52775900 | 0.29473100  | 0.32672700  |
| C | -1.11427100 | 1.50692000  | -0.27162500 |
| C | 0.14420400  | 2.09296500  | -0.34207600 |
| C | 1.48344200  | 1.72358800  | -0.04001200 |
| C | 2.18946300  | 0.54430700  | 0.18817600  |
| C | 1.82750000  | -0.80642000 | 0.08524400  |
| C | 0.63030100  | -1.27412200 | -0.43395700 |
| H | 0.13234500  | 0.10490100  | 1.64505400  |
| H | -1.03300600 | -1.33092100 | 1.62709500  |
| H | -1.90511500 | 2.08296900  | -0.75239100 |
| H | 0.09806300  | 3.11867100  | -0.70972300 |
| H | 2.13732600  | 2.59491700  | -0.03111300 |
| H | 3.22421600  | 0.70414000  | 0.48650000  |
| H | 0.07917600  | -0.69674900 | -1.16449600 |
| O | 0.34395700  | -2.59900100 | -0.53634800 |
| H | 0.94541500  | -3.10872200 | 0.02814700  |
| H | 2.52077300  | -1.54217500 | 0.49556000  |
| C | -2.84438300 | -0.30022300 | -0.11101200 |
| H | -3.60385600 | 0.47821000  | -0.23803200 |
| H | -2.73615600 | -0.80768900 | -1.07917100 |
| H | -3.21689200 | -1.03251000 | 0.60995300  |

#### 1-OH-7-NH<sub>2</sub>-substituted

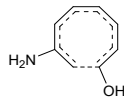

|   |             |             |             |
|---|-------------|-------------|-------------|
| C | -0.67243500 | -0.53319000 | 1.17654100  |
| C | -1.57179200 | 0.03470800  | 0.30747600  |
| C | -1.36092800 | 1.32361200  | -0.26321500 |
| C | -0.21408700 | 2.08910900  | -0.32778100 |
| C | 1.17177700  | 1.93286900  | -0.02199100 |
| C | 2.05370700  | 0.88047800  | 0.18011900  |
| C | 1.92625600  | -0.51661300 | 0.06777200  |
| C | 0.83593700  | -1.19021800 | -0.44707200 |
| H | 0.03527100  | 0.10842600  | 1.68366700  |
| H | -0.86275600 | -1.51541500 | 1.60225700  |
| H | -2.24142400 | 1.77862300  | -0.71755100 |
| H | -0.42002500 | 3.09927600  | -0.68390000 |
| H | 1.67371300  | 2.89880800  | 0.01479600  |
| H | 3.05191800  | 1.20359900  | 0.47210800  |
| H | 0.15578900  | -0.73815900 | -1.15620300 |
| O | 0.78344300  | -2.54333400 | -0.51860600 |
| H | 1.48113900  | -2.92557000 | 0.03601600  |
| H | 2.74200500  | -1.11972900 | 0.46915300  |
| N | -2.64151000 | -0.71799000 | -0.19091200 |
| H | -3.08562200 | -1.33943800 | 0.47316300  |
| H | -3.31758600 | -0.20234600 | -0.73937400 |

#### 1-OH-7-OH-substituted

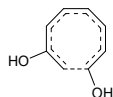

|   |             |             |             |
|---|-------------|-------------|-------------|
| C | -0.61789800 | -0.63938500 | 1.16048500  |
| C | -1.56531700 | -0.13571300 | 0.30865000  |
| C | -1.49788300 | 1.14744800  | -0.28645200 |
| C | -0.43766600 | 2.03591900  | -0.35207100 |
| C | 0.94775600  | 2.03450800  | -0.02726100 |
| C | 1.93581800  | 1.08472600  | 0.21269200  |
| C | 1.96422300  | -0.31433600 | 0.09899200  |
| C | 0.96122500  | -1.09375500 | -0.44961300 |
| H | 0.03275900  | 0.05552100  | 1.67296400  |
| H | -0.75770500 | -1.63024900 | 1.58149100  |
| H | -2.42607600 | 1.50132600  | -0.73671300 |
| H | -0.75166800 | 3.01383700  | -0.71792400 |
| H | 1.34308700  | 3.04887100  | 0.00020100  |
| H | 2.88286600  | 1.51669100  | 0.53259700  |
| H | 0.26648500  | -0.69146900 | -1.17410200 |
| O | 1.05497900  | -2.44046100 | -0.55625600 |
| H | 1.76362100  | -2.76786500 | 0.01919100  |
| H | 2.82699300  | -0.82989700 | 0.52255100  |
| O | -2.59136700 | -0.97209600 | -0.05003700 |
| H | -3.03080800 | -0.63278800 | -0.84244700 |

#### 1-OH-7-F-substituted

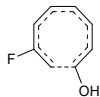

|   |             |             |             |
|---|-------------|-------------|-------------|
| C | -0.54748200 | -0.73887100 | 1.11933700  |
| C | -1.53190900 | -0.26841200 | 0.29180200  |
| C | -1.60583700 | 0.98627900  | -0.32495800 |
| C | -0.64717600 | 1.99114200  | -0.35934200 |
| C | 0.71914100  | 2.12114200  | -0.00778300 |
| C | 1.79404600  | 1.26567000  | 0.24058700  |
| C | 1.96692200  | -0.11703100 | 0.10889400  |
| C | 1.05333400  | -1.00297300 | -0.44773800 |
| H | 0.03982600  | -0.01259100 | 1.66365200  |
| H | -0.63367900 | -1.74285900 | 1.52273000  |
| H | -2.55333000 | 1.19861800  | -0.81392100 |
| H | -1.05419000 | 2.93308700  | -0.72653800 |
| H | 1.01781900  | 3.16770100  | 0.03165800  |
| H | 2.68735500  | 1.78579100  | 0.58258500  |
| H | 0.33686700  | -0.67661300 | -1.18990400 |
| O | 1.30947900  | -2.32843100 | -0.56441500 |
| H | 2.04951700  | -2.57554400 | 0.01174300  |
| H | 2.87972800  | -0.54210800 | 0.52845700  |
| F | -2.49466400 | -1.14774500 | -0.09110500 |

#### 1-OH-7-CHO-substituted

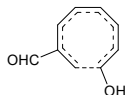

|   |             |             |             |
|---|-------------|-------------|-------------|
| C | -0.28854900 | -0.54545100 | 1.19946400  |
| C | -1.22000200 | 0.14124100  | 0.44033000  |
| C | -0.97645000 | 1.37992300  | -0.18702600 |
| C | 0.20871300  | 2.08858100  | -0.32225600 |
| C | 1.58615400  | 1.85726800  | -0.05629000 |
| C | 2.41130200  | 0.75503200  | 0.14863200  |
| C | 2.18419700  | -0.62505200 | 0.03675800  |
| C | 1.03281500  | -1.21110100 | -0.46537100 |
| H | 0.50345700  | 0.00245900  | 1.69222000  |
| H | -0.56428000 | -1.50413900 | 1.63759100  |
| H | -1.85874100 | 1.84698300  | -0.62039700 |
| H | 0.04736700  | 3.09614500  | -0.70555900 |
| H | 2.14992000  | 2.78947200  | -0.06339400 |
| H | 3.43117000  | 1.01439400  | 0.42593900  |
| H | 0.39566300  | -0.67230300 | -1.15450100 |
| O | 0.89009300  | -2.55369400 | -0.60336700 |
| H | 1.57379100  | -3.01658300 | -0.09455900 |
| H | 2.95962700  | -1.28893200 | 0.42214900  |
| C | -2.52410000 | -0.52388100 | 0.18937700  |
| H | -2.60983700 | -1.54896700 | 0.60746900  |
| O | -3.45416900 | -0.02354300 | -0.40271600 |

#### 1-OH-7-CN-substituted

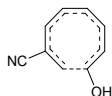



|   |             |             |             |
|---|-------------|-------------|-------------|
| C | 0.49236400  | 0.34945900  | 1.18233400  |
| C | 1.24349400  | -0.47934000 | 0.37002800  |
| C | 0.73535000  | -1.63037300 | -0.27711800 |
| C | -0.57507700 | -2.07511800 | -0.37547400 |
| C | -1.86822200 | -1.57422600 | -0.06420900 |
| C | -2.44573200 | -0.33277800 | 0.18492500  |
| C | -1.94844600 | 0.97608800  | 0.09106900  |
| C | -0.72275800 | 1.33507500  | -0.44581800 |
| H | -0.38471300 | -0.06528600 | 1.66057300  |
| H | 0.95405300  | 1.21752800  | 1.64314400  |
| H | 1.47902400  | -2.26930000 | -0.74734100 |
| H | -0.63218000 | -3.08855300 | -0.77190800 |
| H | -2.60878600 | -2.37303200 | -0.06869700 |
| H | -3.48896900 | -0.38760400 | 0.48986700  |
| H | -0.21692100 | 0.69731900  | -1.15910500 |
| O | -0.31539900 | 2.61973300  | -0.55682500 |
| H | -0.87350700 | 3.19953800  | -0.01521600 |
| H | -2.56484100 | 1.77162000  | 0.51216500  |
| C | 2.59790200  | -0.09254300 | 0.05282200  |
| N | 3.68668300  | 0.21177700  | -0.20003200 |

#### 1-OH-7-NO<sub>2</sub>-substituted

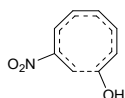

|   |             |             |             |
|---|-------------|-------------|-------------|
| C | 0.17056600  | 0.42132600  | 1.15107600  |
| C | 0.92131400  | -0.44030300 | 0.38846900  |
| C | 0.47382400  | -1.62792100 | -0.21211700 |
| C | -0.82516800 | -2.11080400 | -0.28407900 |
| C | -2.12770500 | -1.63070500 | 0.01892000  |
| C | -2.73727500 | -0.39480300 | 0.21640200  |
| C | -2.27767000 | 0.92083200  | 0.05257200  |
| C | -1.06902100 | 1.28516400  | -0.51938900 |
| H | -0.68849500 | 0.00422800  | 1.65824100  |
| H | 0.62290000  | 1.32235700  | 1.54924000  |
| H | 1.24359400  | -2.25619700 | -0.64714700 |
| H | -0.85720600 | -3.14228000 | -0.63302600 |
| H | -2.84613800 | -2.44826700 | 0.06143200  |
| H | -3.77485800 | -0.46332100 | 0.53710300  |
| H | -0.55754300 | 0.62186800  | -1.20571500 |
| O | -0.69588700 | 2.56922100  | -0.70620800 |
| H | -1.25010000 | 3.16612200  | -0.17932000 |
| H | -2.91131400 | 1.71953800  | 0.44061500  |
| N | 2.30122700  | -0.01035800 | 0.05162200  |
| O | 3.02074100  | -0.80405600 | -0.53032100 |
| O | 2.64231800  | 1.11130400  | 0.38479300  |

#### 1-F-7-CH<sub>3</sub>-substituted

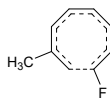

|   |             |             |             |
|---|-------------|-------------|-------------|
| C | 0.72284000  | 0.44195800  | 1.16995600  |
| C | 1.55327400  | -0.24775900 | 0.32256300  |
| C | 1.14539900  | -1.46918200 | -0.27524900 |
| C | -0.09852100 | -2.07364500 | -0.34880000 |

|   |             |             |             |
|---|-------------|-------------|-------------|
| C | -1.44994000 | -1.74089700 | -0.02747500 |
| C | -2.18860900 | -0.58995500 | 0.20035700  |
| C | -1.86181400 | 0.77839000  | 0.09587100  |
| C | -0.69544400 | 1.25335600  | -0.43806500 |
| H | -0.10391300 | -0.07103600 | 1.64506900  |
| H | 1.05007100  | 1.37367800  | 1.62632200  |
| H | 1.94367300  | -2.03424200 | -0.75726700 |
| H | -0.03512000 | -3.09210000 | -0.73301000 |
| H | -2.07305900 | -2.63434400 | -0.00378500 |
| H | -3.21694900 | -0.77780300 | 0.50290000  |
| H | -0.10214900 | 0.72896800  | -1.17548100 |
| F | -0.49980100 | 2.58762000  | -0.47860400 |
| H | -2.54445600 | 1.51036500  | 0.52132100  |
| C | 2.86571600  | 0.34878500  | -0.12622400 |
| H | 3.64515200  | -0.41878400 | -0.17994400 |
| H | 2.77383700  | 0.78522400  | -1.12958900 |
| H | 3.20370800  | 1.13518700  | 0.55328300  |

1-F-7-NH<sub>2</sub>-substituted

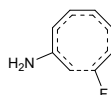

|   |             |             |             |
|---|-------------|-------------|-------------|
| C | -0.72976800 | -0.52617000 | 1.19295500  |
| C | -1.58379300 | 0.07326000  | 0.30741600  |
| C | -1.31312900 | 1.35763100  | -0.26170200 |
| C | -0.14293400 | 2.07791800  | -0.32967000 |
| C | 1.24199800  | 1.88084200  | -0.01219000 |
| C | 2.09377100  | 0.81155300  | 0.18407100  |
| C | 1.92134400  | -0.59002000 | 0.07364300  |
| C | 0.82393900  | -1.20522400 | -0.45004500 |
| H | 0.01732300  | 0.07516500  | 1.69275400  |
| H | -0.95256000 | -1.50582200 | 1.60854000  |
| H | -2.17422800 | 1.84699400  | -0.71788100 |
| H | -0.31064400 | 3.08990900  | -0.69955200 |
| H | 1.76464300  | 2.83527000  | 0.03772100  |
| H | 3.10123700  | 1.10413500  | 0.47456600  |
| H | 0.13243100  | -0.77797400 | -1.16348200 |
| F | 0.78555200  | -2.55216000 | -0.45718900 |
| H | 2.68920800  | -1.23624100 | 0.49231100  |
| N | -2.67544900 | -0.63105200 | -0.21584800 |
| H | -3.15164400 | -1.24278200 | 0.43511800  |
| H | -3.32615900 | -0.08058400 | -0.76133400 |

1-F-7-OH-substituted

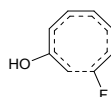

|   |             |             |             |
|---|-------------|-------------|-------------|
| C | -0.71030000 | -0.59166100 | 1.13522000  |
| C | -1.58841400 | 0.02313300  | 0.28276900  |
| C | -1.36627200 | 1.29328700  | -0.30620800 |
| C | -0.21960900 | 2.06039600  | -0.34909300 |
| C | 1.15760200  | 1.91769900  | 0.00548600  |
| C | 2.04896900  | 0.88013100  | 0.22931300  |
| C | 1.93661500  | -0.52054100 | 0.09922800  |
| C | 0.86145700  | -1.16380800 | -0.44921700 |

|   |             |             |             |
|---|-------------|-------------|-------------|
| H | 0.01683800  | 0.02038300  | 1.65109300  |
| H | -0.92976500 | -1.56923700 | 1.55930900  |
| H | -2.24421300 | 1.71804200  | -0.78777200 |
| H | -0.41784300 | 3.06337500  | -0.72751300 |
| H | 1.64348500  | 2.89081100  | 0.06492800  |
| H | 3.03206300  | 1.21274700  | 0.55710900  |
| H | 0.19873600  | -0.74132900 | -1.19272100 |
| F | 0.87194800  | -2.51210400 | -0.48696200 |
| H | 2.71753100  | -1.14490000 | 0.52673800  |
| O | -2.70984800 | -0.60649700 | -0.18889500 |
| H | -2.90586400 | -1.38079100 | 0.35764700  |

#### 1-F-7-F-substituted

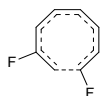

|   |             |             |             |
|---|-------------|-------------|-------------|
| C | -0.64282000 | -0.71376400 | 1.12943900  |
| C | -1.56214900 | -0.15534500 | 0.29172900  |
| C | -1.51350200 | 1.10914400  | -0.32242000 |
| C | -0.47279500 | 2.02016900  | -0.36233300 |
| C | 0.90357800  | 2.04129300  | 0.00400600  |
| C | 1.90559000  | 1.11168000  | 0.24743700  |
| C | 1.96563300  | -0.28997100 | 0.11453300  |
| C | 0.99299800  | -1.06953600 | -0.45297800 |
| H | 0.02757800  | -0.05362900 | 1.66153400  |
| H | -0.80789100 | -1.71194000 | 1.52230000  |
| H | -2.43774700 | 1.40810300  | -0.81118900 |
| H | -0.79293000 | 2.98920800  | -0.74430000 |
| H | 1.27588300  | 3.06334400  | 0.05940400  |
| H | 2.83718900  | 1.55645600  | 0.59201800  |
| H | 0.29079700  | -0.73208900 | -1.20374800 |
| F | 1.18953200  | -2.39989400 | -0.50042300 |
| H | 2.81428500  | -0.81136000 | 0.55131500  |
| F | -2.59690600 | -0.93678600 | -0.11333300 |

#### 1-F-7-CHO-substituted

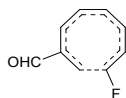

|   |             |             |             |
|---|-------------|-------------|-------------|
| C | 0.62304000  | 0.21685800  | 1.14018200  |
| C | 1.14651900  | -0.70552800 | 0.27090400  |
| C | 0.41457200  | -1.76384000 | -0.33463700 |
| C | -0.94081200 | -2.01413800 | -0.37929900 |
| C | -2.13263200 | -1.33599400 | 0.03226500  |
| C | -2.50944800 | -0.03359600 | 0.29395800  |
| C | -1.83248800 | 1.20263300  | 0.14443000  |
| C | -0.63899800 | 1.37747800  | -0.48975200 |
| H | -0.29863400 | 0.00942200  | 1.66652200  |
| H | 1.26684800  | 1.00602400  | 1.52173600  |
| H | 1.02714900  | -2.50926300 | -0.84316600 |
| H | -1.17162700 | -2.99465100 | -0.79541700 |
| H | -2.96967500 | -2.02941700 | 0.10783900  |
| H | -3.52624200 | 0.06756300  | 0.66747500  |
| H | -0.21042800 | 0.69785700  | -1.21363600 |
| F | -0.12335000 | 2.61379000  | -0.57063600 |

|   |             |             |             |
|---|-------------|-------------|-------------|
| H | -2.27239400 | 2.08533500  | 0.60354000  |
| C | 2.56480500  | -0.54877300 | -0.15559200 |
| H | 2.96499800  | -1.37538900 | -0.77906400 |
| O | 3.26660100  | 0.39347600  | 0.13314500  |

1-F-7-CN-substituted

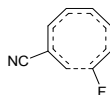

|   |             |             |             |
|---|-------------|-------------|-------------|
| C | 0.52933600  | 0.36385800  | 1.20223100  |
| C | 1.26954400  | -0.44944400 | 0.37681000  |
| C | 0.76336300  | -1.60972800 | -0.27227300 |
| C | -0.53532800 | -2.06654200 | -0.37914600 |
| C | -1.84385300 | -1.59251400 | -0.05348100 |
| C | -2.44986900 | -0.37159200 | 0.18467700  |
| C | -1.97814000 | 0.95718100  | 0.08786800  |
| C | -0.77900900 | 1.32580100  | -0.45305600 |
| H | -0.36399800 | -0.03831900 | 1.66072900  |
| H | 0.97602400  | 1.24465400  | 1.65347800  |
| H | 1.51485800  | -2.24104500 | -0.74069200 |
| H | -0.57961800 | -3.07365100 | -0.79266800 |
| H | -2.55985000 | -2.41332500 | -0.03850900 |
| H | -3.49232500 | -0.44679700 | 0.48659200  |
| H | -0.21678800 | 0.74294400  | -1.17095000 |
| F | -0.46198700 | 2.63026400  | -0.48655100 |
| H | -2.58490100 | 1.75145700  | 0.51717300  |
| C | 2.61764500  | -0.05395700 | 0.04188600  |
| N | 3.70033600  | 0.25476200  | -0.22990000 |

1-F-7-NO<sub>2</sub>-substituted

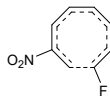

|   |             |             |             |
|---|-------------|-------------|-------------|
| C | 0.20918600  | 0.42773500  | 1.17473200  |
| C | 0.94257900  | -0.42267800 | 0.39736700  |
| C | 0.49428000  | -1.61969900 | -0.20323400 |
| C | -0.79383700 | -2.10867000 | -0.28687500 |
| C | -2.10980900 | -1.64652800 | 0.02636400  |
| C | -2.74088000 | -0.42898000 | 0.20858100  |
| C | -2.30173800 | 0.90527700  | 0.04529900  |
| C | -1.11882500 | 1.28317500  | -0.52351500 |
| H | -0.67060700 | 0.02826200  | 1.66023900  |
| H | 0.64974900  | 1.34046600  | 1.55987300  |
| H | 1.27061200  | -2.24352500 | -0.63350900 |
| H | -0.81791800 | -3.13438400 | -0.65265200 |
| H | -2.80812900 | -2.48028500 | 0.08753200  |
| H | -3.77958100 | -0.51247000 | 0.52090000  |
| H | -0.54350300 | 0.68326900  | -1.21694000 |
| F | -0.83760300 | 2.59105600  | -0.61679800 |
| H | -2.92667700 | 1.70266700  | 0.44174500  |
| N | 2.31624600  | 0.01315500  | 0.03860400  |
| O | 3.04144100  | -0.79242300 | -0.51822600 |
| O | 2.64168700  | 1.15075200  | 0.32840700  |

1-CHO-7-CH<sub>3</sub>-substituted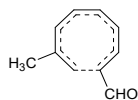

|   |             |             |             |
|---|-------------|-------------|-------------|
| C | -0.16116700 | -0.84688600 | 1.11795000  |
| C | -1.20377900 | -1.24400400 | 0.31563300  |
| C | -2.12808400 | -0.30904300 | -0.21320700 |
| C | -2.11330400 | 1.07772000  | -0.28763600 |
| C | -1.20968200 | 2.14948200  | -0.03040600 |
| C | 0.15657900  | 2.32770400  | 0.16407300  |
| C | 1.22691200  | 1.42445800  | 0.04908300  |
| C | 1.12612900  | 0.16663900  | -0.50645200 |
| H | -0.19077500 | 0.12138800  | 1.60141500  |
| H | 0.51901700  | -1.57970200 | 1.54653400  |
| H | -3.02404200 | -0.75576900 | -0.64602100 |
| H | -3.07651700 | 1.46808200  | -0.61636100 |
| H | -1.74573800 | 3.09830100  | -0.00526700 |
| H | 0.43269000  | 3.33966800  | 0.45502700  |
| H | 0.31812700  | -0.04965800 | -1.19597500 |
| C | 2.29425800  | -0.73974300 | -0.54026000 |
| H | 2.18166600  | -1.64194500 | -1.17469400 |
| O | 3.31565900  | -0.56227200 | 0.08963000  |
| H | 2.18722200  | 1.70890500  | 0.47712100  |
| C | -1.32702400 | -2.68112000 | -0.13327700 |
| H | -2.36599500 | -3.02209600 | -0.07024000 |
| H | -1.01408000 | -2.79389200 | -1.17942000 |
| H | -0.71187200 | -3.34634800 | 0.47785200  |

1-CHO-7-NH<sub>2</sub>-substituted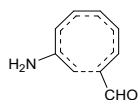

|   |             |             |             |
|---|-------------|-------------|-------------|
| C | -0.14849200 | -0.90821700 | 1.11510900  |
| C | -1.18531000 | -1.28515600 | 0.29671100  |
| C | -2.13461600 | -0.35220900 | -0.21085800 |
| C | -2.12267700 | 1.02757000  | -0.29088600 |
| C | -1.23750000 | 2.11883300  | -0.02210300 |
| C | 0.12077600  | 2.32202700  | 0.17587800  |
| C | 1.21281700  | 1.43981800  | 0.05856500  |
| C | 1.13320300  | 0.19230600  | -0.51359100 |
| H | -0.20097800 | 0.04267100  | 1.62804100  |
| H | 0.54059100  | -1.64631800 | 1.51988300  |
| H | -3.03817200 | -0.81620000 | -0.60546800 |
| H | -3.09101100 | 1.40642300  | -0.61797600 |
| H | -1.79599800 | 3.05375500  | 0.01638900  |
| H | 0.37566700  | 3.33778100  | 0.47384600  |
| H | 0.32581700  | -0.03318700 | -1.20129900 |
| C | 2.30601700  | -0.70673500 | -0.54798600 |
| H | 2.19672300  | -1.60930800 | -1.18354500 |
| O | 3.32882800  | -0.52609200 | 0.07860700  |
| H | 2.16356000  | 1.73518200  | 0.49946000  |
| N | -1.36194200 | -2.61821500 | -0.09621100 |
| H | -0.64709700 | -3.26014800 | 0.22208500  |
| H | -1.59143500 | -2.76383400 | -1.07182100 |

## 1-CHO-7-OH-substituted

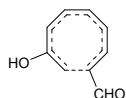

|   |             |             |             |
|---|-------------|-------------|-------------|
| C | -0.14410400 | -0.94385300 | 1.12409600  |
| C | -1.17952300 | -1.28397000 | 0.29967000  |
| C | -2.13162100 | -0.36873600 | -0.22166800 |
| C | -2.13477300 | 1.01185700  | -0.29302600 |
| C | -1.25121100 | 2.10034500  | -0.01803600 |
| C | 0.10745900  | 2.29770000  | 0.18141900  |
| C | 1.20247800  | 1.41810800  | 0.06066300  |
| C | 1.14190700  | 0.17504200  | -0.52019500 |
| H | -0.16944300 | 0.00716700  | 1.63670100  |
| H | 0.51760000  | -1.71600300 | 1.50501400  |
| H | -3.02947000 | -0.83740700 | -0.62748500 |
| H | -3.10411900 | 1.38633300  | -0.62139600 |
| H | -1.80753400 | 3.03628700  | 0.02300300  |
| H | 0.36354600  | 3.31159200  | 0.48465400  |
| H | 0.33803700  | -0.06443600 | -1.20649300 |
| C | 2.32971700  | -0.70979000 | -0.54344600 |
| H | 2.23224300  | -1.62824300 | -1.15450900 |
| O | 3.35083200  | -0.49064500 | 0.07278300  |
| H | 2.14928700  | 1.71720100  | 0.50791700  |
| O | -1.26096200 | -2.59758800 | -0.08722200 |
| H | -1.85107300 | -2.68683700 | -0.84877500 |

## 1-CHO-7-F-substituted

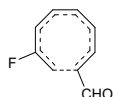

|   |             |             |             |
|---|-------------|-------------|-------------|
| C | -0.08953500 | -0.97279300 | 1.07216600  |
| C | -1.16376200 | -1.28022600 | 0.28709300  |
| C | -2.12463400 | -0.41295900 | -0.25757600 |
| C | -2.16531300 | 0.97228500  | -0.30494700 |
| C | -1.30449300 | 2.06303800  | -0.00207000 |
| C | 0.05450500  | 2.27370500  | 0.21402200  |
| C | 1.16226000  | 1.42084400  | 0.07596000  |
| C | 1.13361900  | 0.17691900  | -0.51885000 |
| H | -0.09641600 | -0.04178500 | 1.61990800  |
| H | 0.55837200  | -1.76798900 | 1.42832900  |
| H | -2.97590900 | -0.92517300 | -0.70044700 |
| H | -3.13806900 | 1.33030800  | -0.64017000 |
| H | -1.87008600 | 2.99311800  | 0.04584500  |
| H | 0.29258300  | 3.28364100  | 0.54358600  |
| H | 0.34905600  | -0.06415600 | -1.22696200 |
| C | 2.36184300  | -0.65272100 | -0.56770200 |
| H | 2.32203000  | -1.53581100 | -1.23415300 |
| O | 3.35604200  | -0.42350800 | 0.08725200  |
| H | 2.10504000  | 1.73714800  | 0.52016100  |
| F | -1.28687600 | -2.57219900 | -0.11585600 |

## 1-CHO-4-CHO-substituted

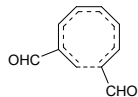

|   |             |             |             |
|---|-------------|-------------|-------------|
| C | -0.27890600 | -0.54313000 | 1.18037400  |
| C | -1.39915000 | -0.24054300 | 0.44079400  |
| C | -1.67821400 | 1.02345400  | -0.13557300 |
| C | -0.90064100 | 2.15797000  | -0.27956100 |
| C | 0.45396300  | 2.54630200  | -0.04526100 |
| C | 1.68448700  | 1.92774000  | 0.12573300  |
| C | 2.06250400  | 0.57603500  | 0.00368500  |
| C | 1.27439800  | -0.41842300 | -0.53040200 |
| H | 0.29554200  | 0.24073500  | 1.65470800  |
| H | -0.14924000 | -1.54602700 | 1.58542100  |
| H | -2.68922400 | 1.10642900  | -0.53111200 |
| H | -1.48410200 | 3.00631600  | -0.63647000 |
| H | 0.54156400  | 3.63270100  | -0.02933300 |
| H | 2.48996800  | 2.60866200  | 0.39390400  |
| H | 0.44921100  | -0.15677400 | -1.18306400 |
| C | 1.76650100  | -1.81497100 | -0.58263800 |
| H | 1.18510200  | -2.50746200 | -1.22237500 |
| O | 2.72443600  | -2.21710400 | 0.04245000  |
| H | 3.03089000  | 0.28056100  | 0.40617600  |
| C | -2.35338300 | -1.34719300 | 0.16634600  |
| H | -2.04298800 | -2.33645800 | 0.56342900  |
| O | -3.40144600 | -1.22441200 | -0.42523500 |

#### 1-CHO-7-CN-substituted

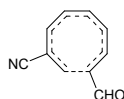

|   |             |             |             |
|---|-------------|-------------|-------------|
| C | -0.49020500 | -0.41908200 | 1.17473100  |
| C | -1.52614300 | 0.01915300  | 0.38637700  |
| C | -1.60728300 | 1.31110700  | -0.20678800 |
| C | -0.66433900 | 2.31345000  | -0.32279800 |
| C | 0.72879400  | 2.49864700  | -0.05667900 |
| C | 1.84980200  | 1.70839800  | 0.13799400  |
| C | 2.02959100  | 0.31209200  | 0.03157300  |
| C | 1.12434600  | -0.56010000 | -0.52273100 |
| H | 0.16717700  | 0.30715200  | 1.63330300  |
| H | -0.50003200 | -1.41956900 | 1.59725000  |
| H | -2.57968600 | 1.55325700  | -0.63030300 |
| H | -1.10739500 | 3.23736100  | -0.69280700 |
| H | 0.97237200  | 3.56065100  | -0.03700800 |
| H | 2.74109200  | 2.26622900  | 0.41834300  |
| H | 0.35506600  | -0.19112400 | -1.19163000 |
| C | 1.40639000  | -2.01725800 | -0.54886700 |
| H | 0.73711400  | -2.62845400 | -1.18349600 |
| O | 2.29182700  | -2.53956400 | 0.09297000  |
| H | 2.93408000  | -0.11673500 | 0.46149900  |
| C | -2.56556800 | -0.92059200 | 0.03580300  |
| N | -3.39524400 | -1.67530700 | -0.25294400 |

#### 1-CHO-7-NO<sub>2</sub>-substituted

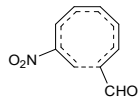

|   |             |             |             |
|---|-------------|-------------|-------------|
| C | -0.23992600 | -0.30140100 | 1.18179000  |
| C | -1.19544600 | 0.29701200  | 0.41774000  |
| C | -1.16070100 | 1.59456100  | -0.14790800 |
| C | -0.10418500 | 2.47153400  | -0.26820000 |
| C | 1.30738000  | 2.47064100  | -0.02269700 |
| C | 2.31863700  | 1.54047000  | 0.13593300  |
| C | 2.32194000  | 0.13105100  | 0.00813100  |
| C | 1.32491000  | -0.62339500 | -0.55548800 |
| H | 0.50080900  | 0.32612500  | 1.65829200  |
| H | -0.37672800 | -1.31117900 | 1.55299800  |
| H | -2.11159200 | 1.94727500  | -0.53480600 |
| H | -0.43233900 | 3.45045800  | -0.61480100 |
| H | 1.68503000  | 3.49208200  | 0.01684800  |
| H | 3.27833000  | 1.97411300  | 0.41072200  |
| H | 0.59478900  | -0.16353300 | -1.21233700 |
| C | 1.43073600  | -2.10589500 | -0.58538100 |
| H | 0.68085500  | -2.63345300 | -1.20300500 |
| O | 2.26285000  | -2.72534300 | 0.04065500  |
| H | 3.16755300  | -0.40921600 | 0.43331800  |
| N | -2.35203400 | -0.54483600 | 0.02579000  |
| O | -3.34979100 | 0.01467600  | -0.39116100 |
| O | -2.23087600 | -1.75262000 | 0.14159800  |

#### 1-CN-7-CH<sub>3</sub>-substituted

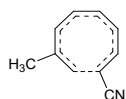

|   |             |             |             |
|---|-------------|-------------|-------------|
| C | -0.15991600 | 0.74166400  | 1.19615900  |
| C | 0.51970100  | 1.55784400  | 0.32285300  |
| C | 1.70738100  | 1.11996200  | -0.31223000 |
| C | 2.28941700  | -0.13688500 | -0.41611600 |
| C | 1.95794800  | -1.48725300 | -0.10352400 |
| C | 0.82021200  | -2.23221900 | 0.19021900  |
| C | -0.54228600 | -1.88842600 | 0.16754300  |
| C | -1.02390300 | -0.70308500 | -0.35441800 |
| H | 0.34778700  | -0.10192900 | 1.64732300  |
| H | -1.05821400 | 1.09577000  | 1.69664700  |
| H | 2.27316000  | 1.90659000  | -0.81220500 |
| H | 3.29515200  | -0.07985800 | -0.83233600 |
| H | 2.84867300  | -2.11429000 | -0.13586900 |
| H | 1.02680100  | -3.26051000 | 0.47987400  |
| H | -0.43941700 | -0.17251200 | -1.09612200 |
| C | -2.43138700 | -0.41672800 | -0.35626100 |
| N | -3.56014700 | -0.15400600 | -0.34290300 |
| H | -1.24449000 | -2.56954000 | 0.64295800  |
| C | -0.05645200 | 2.88973100  | -0.09362900 |
| H | 0.72978000  | 3.64746400  | -0.17563700 |
| H | -0.53801200 | 2.81455400  | -1.07710400 |
| H | -0.80449100 | 3.24465900  | 0.61922500  |

#### 1-CN-7-NH<sub>2</sub>-substituted



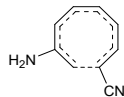

|   |             |             |             |
|---|-------------|-------------|-------------|
| C | -0.17138700 | 0.79000300  | 1.20322700  |
| C | 0.52510600  | 1.56585100  | 0.30893200  |
| C | 1.73106800  | 1.11215900  | -0.30130600 |
| C | 2.27604100  | -0.15167100 | -0.41180800 |
| C | 1.92784900  | -1.50481600 | -0.09650000 |
| C | 0.78620800  | -2.23788100 | 0.18886900  |
| C | -0.57839800 | -1.88253500 | 0.16605800  |
| C | -1.03947500 | -0.69941600 | -0.36599500 |
| H | 0.33340900  | -0.03818300 | 1.68298400  |
| H | -1.07646800 | 1.16222900  | 1.67714100  |
| H | 2.32304300  | 1.90375300  | -0.75972800 |
| H | 3.28460600  | -0.11099200 | -0.82311700 |
| H | 2.81639800  | -2.13490900 | -0.11467300 |
| H | 0.98370300  | -3.26870900 | 0.47684900  |
| H | -0.44271700 | -0.17431700 | -1.10186500 |
| C | -2.43766700 | -0.37177100 | -0.36147400 |
| N | -3.55664300 | -0.06954100 | -0.34617900 |
| H | -1.28618300 | -2.54984500 | 0.65184300  |
| N | 0.07380100  | 2.83200500  | -0.07028500 |
| H | -0.83035400 | 3.09756800  | 0.29983600  |
| H | 0.15838400  | 3.05661800  | -1.05404700 |

#### 1-CN-7-OH-substituted

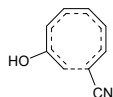

|   |             |             |             |
|---|-------------|-------------|-------------|
| C | -0.07865400 | 0.85142300  | 1.19582200  |
| C | 0.74132600  | 1.48940200  | 0.30524200  |
| C | 1.85719100  | 0.88298200  | -0.32763000 |
| C | 2.23535900  | -0.44299000 | -0.42973600 |
| C | 1.71207000  | -1.72766100 | -0.09109200 |
| C | 0.48130600  | -2.28925100 | 0.21612000  |
| C | -0.82355200 | -1.75787300 | 0.18591300  |
| C | -1.14448900 | -0.53726600 | -0.36580500 |
| H | 0.27541400  | -0.05038700 | 1.67548500  |
| H | -0.90186200 | 1.39295900  | 1.65149100  |
| H | 2.54526400  | 1.58414200  | -0.80179600 |
| H | 3.23555000  | -0.53936900 | -0.85130600 |
| H | 2.50449700  | -2.47523400 | -0.10778900 |
| H | 0.53787100  | -3.33099100 | 0.52602700  |
| H | -0.49356500 | -0.09081200 | -1.10691500 |
| C | -2.50318500 | -0.07140000 | -0.36742800 |
| N | -3.59543600 | 0.31504800  | -0.35820900 |
| H | -1.60876600 | -2.32352700 | 0.68181000  |
| O | 0.41808400  | 2.77597400  | -0.02998800 |
| H | 0.86474600  | 3.03589600  | -0.84807200 |

#### 1-CN-7-F-substituted

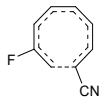

|   |             |             |             |
|---|-------------|-------------|-------------|
| C | -0.11418100 | 0.86939200  | 1.15147900  |
| C | 0.76792200  | 1.46219400  | 0.29148000  |
| C | 1.86462800  | 0.87465800  | -0.35760800 |
| C | 2.24724000  | -0.45627500 | -0.43474900 |
| C | 1.71159300  | -1.72318600 | -0.07681000 |
| C | 0.46946200  | -2.26527300 | 0.24191400  |
| C | -0.82754000 | -1.72897100 | 0.19698400  |
| C | -1.14892300 | -0.50474300 | -0.36108200 |
| H | 0.20119400  | -0.02444600 | 1.67086600  |
| H | -0.92036700 | 1.45673500  | 1.58005300  |
| H | 2.51431800  | 1.58630200  | -0.86203000 |
| H | 3.24596400  | -0.56285400 | -0.85634300 |
| H | 2.49112800  | -2.48437300 | -0.08722300 |
| H | 0.51649900  | -3.30080500 | 0.57309900  |
| H | -0.50939300 | -0.07597600 | -1.12284700 |
| C | -2.51480600 | -0.05765100 | -0.37278700 |
| N | -3.61148900 | 0.31554200  | -0.36312400 |
| H | -1.61781100 | -2.29004700 | 0.69036900  |
| F | 0.51405700  | 2.74064500  | -0.07966600 |

#### 1-CN-7-CHO-substituted

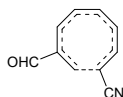

|   |             |             |             |
|---|-------------|-------------|-------------|
| C | 0.29301400  | 0.40338600  | 1.25133000  |
| C | 1.33320800  | -0.00765800 | 0.44687600  |
| C | 1.38799500  | -1.25129200 | -0.22407300 |
| C | 0.42825500  | -2.23407600 | -0.39855100 |
| C | -0.96041200 | -2.40583700 | -0.12149700 |
| C | -2.06449800 | -1.60515300 | 0.14245100  |
| C | -2.22682900 | -0.20762800 | 0.11004600  |
| C | -1.28228900 | 0.67253100  | -0.38091300 |
| H | -0.36497200 | -0.32720200 | 1.70326700  |
| H | 0.32822900  | 1.38468900  | 1.72260800  |
| H | 2.35579200  | -1.46347100 | -0.67546500 |
| H | 0.84772900  | -3.14094700 | -0.83291100 |
| H | -1.23107100 | -3.46060000 | -0.16630700 |
| H | -2.96202900 | -2.15995500 | 0.40671200  |
| H | -0.53830200 | 0.31839900  | -1.08414700 |
| C | -1.53761400 | 2.08580700  | -0.39730000 |
| N | -1.71621200 | 3.23053800  | -0.38750100 |
| H | -3.13259400 | 0.20203900  | 0.55194800  |
| C | 2.44087300  | 0.95741200  | 0.20535000  |
| H | 2.29570900  | 1.95780700  | 0.66201900  |
| O | 3.44309800  | 0.70381500  | -0.42219200 |

#### 1-CN-7-CN-substituted

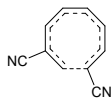

|   |             |             |             |
|---|-------------|-------------|-------------|
| C | 0.54415400  | 0.12854300  | 1.21652400  |
| C | 1.29061200  | -0.65617100 | 0.36669100  |
| C | 0.79444900  | -1.80083800 | -0.31240600 |
| C | -0.49645600 | -2.28057700 | -0.44367100 |
| C | -1.82010400 | -1.85867300 | -0.11689800 |
| C | -2.47679300 | -0.67417700 | 0.18325000  |
| C | -2.04002900 | 0.66508700  | 0.15897500  |
| C | -0.83765300 | 1.08566600  | -0.37002300 |
| H | -0.34784300 | -0.29155500 | 1.66175500  |
| H | 0.98825800  | 0.99367300  | 1.69961700  |
| H | 1.55540200  | -2.40675200 | -0.79917200 |
| H | -0.51041300 | -3.27456000 | -0.88919400 |
| H | -2.50722400 | -2.70361700 | -0.14970900 |
| H | -3.51577700 | -0.80560100 | 0.47757000  |
| H | -0.32175400 | 0.47199100  | -1.09874100 |
| C | -0.49216700 | 2.48021100  | -0.36433200 |
| N | -0.20140100 | 3.60120500  | -0.34045100 |
| H | -2.67748300 | 1.40602000  | 0.63668800  |
| C | 2.64171600  | -0.25313200 | 0.05459200  |
| N | 3.72861100  | 0.05518800  | -0.19883900 |

#### 1-CN-7-NO<sub>2</sub>-substituted

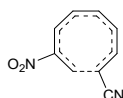

|   |             |             |             |
|---|-------------|-------------|-------------|
| C | 0.22932200  | 0.21702600  | 1.20547700  |
| C | 1.03232900  | -0.52744200 | 0.38695300  |
| C | 0.70044200  | -1.73255400 | -0.26467900 |
| C | -0.52752700 | -2.35769900 | -0.38048200 |
| C | -1.88814000 | -2.07412400 | -0.05606600 |
| C | -2.66988900 | -0.96015300 | 0.21112600  |
| C | -2.38795600 | 0.41927100  | 0.14226200  |
| C | -1.24750700 | 0.96459100  | -0.40896300 |
| H | -0.60712300 | -0.27897200 | 1.67861300  |
| H | 0.59492100  | 1.14457700  | 1.63258200  |
| H | 1.53626300  | -2.24736700 | -0.72753600 |
| H | -0.43119000 | -3.35826500 | -0.79929400 |
| H | -2.47869200 | -2.98969400 | -0.05705200 |
| H | -3.68711500 | -1.19635200 | 0.51563400  |
| H | -0.66372500 | 0.39439500  | -1.12179800 |
| C | -1.07521100 | 2.39015900  | -0.44819300 |
| N | -0.93276700 | 3.53936900  | -0.46252000 |
| H | -3.10570100 | 1.09584900  | 0.60140000  |
| N | 2.36096200  | 0.04917500  | 0.05123200  |
| O | 3.16104000  | -0.66727100 | -0.52363000 |
| O | 2.57018500  | 1.20246800  | 0.37761300  |

#### 1-NO<sub>2</sub>-7-CH<sub>3</sub>-substituted

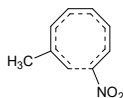

|   |            |             |             |
|---|------------|-------------|-------------|
| C | 0.23720800 | 0.71945700  | 1.27043700  |
| C | 1.00705500 | 1.46465300  | 0.41527700  |
| C | 2.12824700 | 0.89549800  | -0.24681200 |
| C | 2.53400400 | -0.41782300 | -0.42054700 |

|   |             |             |             |
|---|-------------|-------------|-------------|
| C | 2.02836000  | -1.73070700 | -0.17069500 |
| C | 0.80571700  | -2.33405800 | 0.08862100  |
| C | -0.49988100 | -1.80567600 | 0.10432900  |
| C | -0.80252200 | -0.55265000 | -0.35286300 |
| H | 0.62108600  | -0.20778700 | 1.67862300  |
| H | -0.61136900 | 1.16629700  | 1.78463700  |
| H | 2.79618300  | 1.62215200  | -0.71056800 |
| H | 3.53470200  | -0.47604000 | -0.84834600 |
| H | 2.83108200  | -2.46474300 | -0.23835200 |
| H | 0.87151200  | -3.39504300 | 0.31897800  |
| H | -0.23527300 | -0.02220200 | -1.10202200 |
| N | -2.17353600 | -0.06859500 | -0.27239900 |
| O | -2.44172400 | 0.91106500  | -0.95229500 |
| O | -2.95345800 | -0.63080600 | 0.47966600  |
| H | -1.29656800 | -2.38485900 | 0.56410300  |
| C | 0.61497300  | 2.87480900  | 0.04696100  |
| H | 0.18266200  | 2.90687300  | -0.96052500 |
| H | -0.12567800 | 3.27731000  | 0.74174200  |
| H | 1.48889000  | 3.53511100  | 0.05130300  |

1-NO<sub>2</sub>-7-NH<sub>2</sub>-substituted

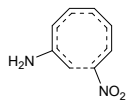

|   |             |             |             |
|---|-------------|-------------|-------------|
| C | 0.20045700  | 0.76124600  | 1.28846100  |
| C | 0.94969100  | 1.49464200  | 0.40661200  |
| C | 2.11337000  | 0.95346300  | -0.22567700 |
| C | 2.53366700  | -0.34594800 | -0.40513000 |
| C | 2.05808500  | -1.67943600 | -0.16092500 |
| C | 0.85405500  | -2.31684700 | 0.07796800  |
| C | -0.47109600 | -1.82392500 | 0.09030600  |
| C | -0.79129400 | -0.58206500 | -0.37024200 |
| H | 0.62180300  | -0.13491800 | 1.72546500  |
| H | -0.67124800 | 1.19185400  | 1.77672300  |
| H | 2.77927700  | 1.70722700  | -0.64463100 |
| H | 3.54023600  | -0.38188200 | -0.82152800 |
| H | 2.88564400  | -2.38633500 | -0.21045900 |
| H | 0.94825600  | -3.37746000 | 0.30111400  |
| H | -0.22262300 | -0.03312300 | -1.10441200 |
| N | -2.15843400 | -0.09243300 | -0.27682700 |
| O | -2.40651100 | 0.93407600  | -0.89565200 |
| O | -2.95568300 | -0.69039600 | 0.42632000  |
| H | -1.25301700 | -2.41867200 | 0.55461100  |
| N | 0.61093700  | 2.80289500  | 0.05895900  |
| H | -0.28185200 | 3.11794800  | 0.41990600  |
| H | 0.70195000  | 3.02590400  | -0.92530500 |

1-NO<sub>2</sub>-7-OH-substituted

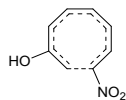

|   |            |             |             |
|---|------------|-------------|-------------|
| C | 0.26097800 | 0.79425700  | 1.28623800  |
| C | 1.08109200 | 1.43841600  | 0.40490600  |
| C | 2.16437500 | 0.81922800  | -0.28011600 |
| C | 2.49373900 | -0.50883200 | -0.45874900 |

|   |             |             |             |
|---|-------------|-------------|-------------|
| C | 1.93762100  | -1.79660000 | -0.17095700 |
| C | 0.69608000  | -2.33448200 | 0.11885600  |
| C | -0.58978000 | -1.74948700 | 0.13825000  |
| C | -0.84932200 | -0.50437000 | -0.35204200 |
| H | 0.58057000  | -0.14664900 | 1.71248500  |
| H | -0.54005300 | 1.34015000  | 1.77624100  |
| H | 2.86878800  | 1.52012100  | -0.72954300 |
| H | 3.47988100  | -0.61622200 | -0.90949800 |
| H | 2.70905600  | -2.56353600 | -0.23092000 |
| H | 0.71708000  | -3.39249000 | 0.37102100  |
| H | -0.26433700 | -0.00460400 | -1.10862300 |
| N | -2.20470200 | 0.02776400  | -0.28074600 |
| O | -2.46165000 | 0.95181500  | -1.03616300 |
| O | -2.98142000 | -0.45436300 | 0.52773600  |
| H | -1.40126700 | -2.28280400 | 0.62620900  |
| O | 0.80960400  | 2.75132100  | 0.14010100  |
| H | 1.18223100  | 3.01271400  | -0.71386700 |

1-NO<sub>2</sub>-7-F-substituted

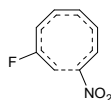

|   |             |             |             |
|---|-------------|-------------|-------------|
| C | 0.21964600  | 0.81872200  | 1.23582100  |
| C | 1.10798600  | 1.41339400  | 0.38926100  |
| C | 2.17924000  | 0.81531400  | -0.30150000 |
| C | 2.51589500  | -0.51770900 | -0.45631700 |
| C | 1.94643800  | -1.78938000 | -0.15664700 |
| C | 0.69293100  | -2.30933900 | 0.13655500  |
| C | -0.58672800 | -1.72225400 | 0.13928700  |
| C | -0.85520200 | -0.47236900 | -0.34964700 |
| H | 0.49665900  | -0.11565300 | 1.70332400  |
| H | -0.56671600 | 1.41088000  | 1.69500400  |
| H | 2.84890000  | 1.53037200  | -0.77419000 |
| H | 3.50330400  | -0.63301400 | -0.90140000 |
| H | 2.70524900  | -2.56939400 | -0.20887700 |
| H | 0.70474100  | -3.36323900 | 0.40579300  |
| H | -0.28998200 | 0.01994200  | -1.12667600 |
| N | -2.22390000 | 0.03253500  | -0.27879100 |
| O | -2.50373400 | 0.94247500  | -1.04146900 |
| O | -2.98329700 | -0.45481000 | 0.54319100  |
| H | -1.40132900 | -2.25708600 | 0.62088100  |
| F | 0.90461100  | 2.71442800  | 0.07811500  |

1-NO<sub>2</sub>-7-CHO-substituted

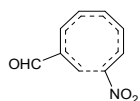

|   |             |             |             |
|---|-------------|-------------|-------------|
| C | -0.34476600 | -0.30440100 | 1.31381900  |
| C | -1.45434700 | -0.37352200 | 0.50955500  |
| C | -2.01722800 | 0.72655300  | -0.18801800 |
| C | -1.54032000 | 2.00259600  | -0.41460800 |
| C | -0.33460100 | 2.73623400  | -0.17906200 |
| C | 1.00285800  | 2.46382900  | 0.05862500  |
| C | 1.71452000  | 1.24512200  | 0.06390900  |
| C | 1.19212300  | 0.06066700  | -0.37277300 |

|   |             |             |             |
|---|-------------|-------------|-------------|
| H | -0.02372500 | 0.64222500  | 1.72944200  |
| H | 0.03396800  | -1.20416200 | 1.79850500  |
| H | -2.99435500 | 0.51566000  | -0.61974500 |
| H | -2.29459100 | 2.64621700  | -0.86619400 |
| H | -0.52131100 | 3.80780300  | -0.24763600 |
| H | 1.60608200  | 3.34176700  | 0.27729700  |
| H | 0.39134000  | -0.03107500 | -1.09041200 |
| N | 1.99397400  | -1.15408600 | -0.29613600 |
| O | 1.57252900  | -2.11428400 | -0.92194900 |
| O | 2.99307200  | -1.15639000 | 0.40435200  |
| H | 2.71025500  | 1.22602400  | 0.50089000  |
| C | -2.06794300 | -1.71446400 | 0.29168900  |
| H | -1.51351500 | -2.56070000 | 0.74503300  |
| O | -3.09731800 | -1.89943100 | -0.31403400 |

#### 1-NO<sub>2</sub>-7-CN-substituted

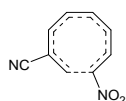

|   |             |             |             |
|---|-------------|-------------|-------------|
| C | 0.45610500  | 0.38361400  | 1.27786900  |
| C | 1.51105500  | 0.60061600  | 0.42758400  |
| C | 2.19620800  | -0.42466700 | -0.28728700 |
| C | 1.89054000  | -1.75805600 | -0.46954600 |
| C | 0.81281600  | -2.65237800 | -0.17335500 |
| C | -0.53795400 | -2.56766200 | 0.11295700  |
| C | -1.41734600 | -1.46191200 | 0.12826200  |
| C | -1.09784900 | -0.22736900 | -0.35714000 |
| H | 0.30413900  | -0.60706200 | 1.68580900  |
| H | -0.02995900 | 1.21419300  | 1.78215400  |
| H | 3.12165000  | -0.10407900 | -0.76061300 |
| H | 2.71236200  | -2.29572000 | -0.94062500 |
| H | 1.15073400  | -3.68657500 | -0.23186200 |
| H | -1.00220700 | -3.51816600 | 0.36520500  |
| H | -0.34623500 | -0.03153200 | -1.10758100 |
| N | -2.08574600 | 0.84553600  | -0.27871300 |
| O | -1.90375400 | 1.79705400  | -1.01818000 |
| O | -2.99728200 | 0.73830100  | 0.52589300  |
| H | -2.38708100 | -1.57714000 | 0.60655200  |
| C | 1.92017900  | 1.95943800  | 0.15684700  |
| N | 2.26894100  | 3.04210600  | -0.05812900 |

#### 1-NO<sub>2</sub>-7-NO<sub>2</sub>-substituted

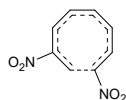

|   |             |             |             |
|---|-------------|-------------|-------------|
| C | -0.31808200 | -0.05430500 | 1.26642900  |
| C | -1.32127000 | 0.33715300  | 0.43026900  |
| C | -1.41873200 | 1.56224300  | -0.26779700 |
| C | -0.48369000 | 2.56672500  | -0.41670400 |
| C | 0.89292100  | 2.78726900  | -0.09476600 |
| C | 2.01455600  | 2.02410300  | 0.17884500  |
| C | 2.21838700  | 0.62630700  | 0.14381400  |
| C | 1.32295400  | -0.26111100 | -0.37818100 |
| H | 0.31440900  | 0.70864800  | 1.69960400  |
| H | -0.33929800 | -1.03617800 | 1.72853900  |

|   |             |             |             |
|---|-------------|-------------|-------------|
| H | -2.37995400 | 1.74258400  | -0.73823300 |
| H | -0.91889400 | 3.45775800  | -0.86674000 |
| H | 1.12255500  | 3.85216300  | -0.11491600 |
| H | 2.89110100  | 2.60204700  | 0.46135900  |
| H | 0.57823900  | -0.02238000 | -1.12332300 |
| N | 1.63679900  | -1.68759700 | -0.36141000 |
| O | 1.00156300  | -2.38274500 | -1.13454300 |
| O | 2.47878300  | -2.08866900 | 0.42516800  |
| H | 3.11302300  | 0.21999900  | 0.61008600  |
| N | -2.37771100 | -0.67013300 | 0.13429800  |
| O | -2.25602600 | -1.77264100 | 0.63173400  |
| O | -3.30395300 | -0.32480000 | -0.57711500 |

### 5.3.8 1,8-substituted

#### 1-CH<sub>3</sub>-8-CH<sub>3</sub>-substituted

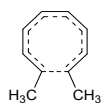

|   |             |             |             |
|---|-------------|-------------|-------------|
| C | 0.72663600  | 0.94155000  | -0.63162000 |
| C | 0.07153300  | 1.73965800  | 0.28731600  |
| C | -1.28420700 | 1.61392900  | 0.63708800  |
| C | -2.22412000 | 0.63689200  | 0.31511700  |
| C | -2.22467000 | -0.63582400 | -0.31456800 |
| C | -1.28527600 | -1.61289800 | -0.63789400 |
| C | 0.07027000  | -1.73976000 | -0.28782600 |
| C | 0.72548300  | -0.94198200 | 0.63129900  |
| H | 0.10820300  | 0.42027400  | -1.35399900 |
| H | 0.65368900  | 2.48729000  | 0.82835100  |
| H | -1.67830800 | 2.42250800  | 1.25102400  |
| H | -3.23563700 | 0.93699700  | 0.58984700  |
| H | -3.23656700 | -0.93554800 | -0.58831200 |
| H | -1.67988600 | -2.42077400 | -1.25243000 |
| H | 0.10703400  | -0.42000700 | 1.35314700  |
| C | 2.14585100  | -1.20249700 | 1.04462000  |
| H | 2.71112700  | -1.69611400 | 0.24725000  |
| H | 2.66457300  | -0.27666400 | 1.31464000  |
| H | 2.16945000  | -1.85484800 | 1.92656200  |
| H | 0.65210200  | -2.48766600 | -0.82882500 |
| C | 2.14747600  | 1.20119200  | -1.04385100 |
| H | 2.71242800  | 1.69430900  | -0.24591600 |
| H | 2.66578400  | 0.27512100  | -1.31368800 |
| H | 2.17214100  | 1.85357200  | -1.92574600 |

#### 1-CH<sub>3</sub>-8-NH<sub>2</sub>-substituted

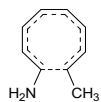

|   |             |             |             |
|---|-------------|-------------|-------------|
| C | -0.71893300 | 0.88446200  | 0.64282300  |
| C | -0.06104100 | 1.73674200  | -0.23850400 |
| C | 1.28509100  | 1.62425900  | -0.59359900 |
| C | 2.22406900  | 0.63306200  | -0.26992700 |
| C | 2.20190100  | -0.64827300 | 0.31431300  |
| C | 1.23172300  | -1.62465000 | 0.59841900  |
| C | -0.10178300 | -1.73747300 | 0.22288500  |

|   |             |             |             |
|---|-------------|-------------|-------------|
| C | -0.75715200 | -0.87813000 | -0.66949400 |
| H | -0.09822700 | 0.38067200  | 1.37591200  |
| H | -0.64844200 | 2.50061000  | -0.75202200 |
| H | 1.68399300  | 2.44012100  | -1.19399300 |
| H | 3.24223900  | 0.94063100  | -0.51079400 |
| H | 3.20412900  | -0.98339800 | 0.58034600  |
| H | 1.60439900  | -2.45173800 | 1.20052200  |
| H | -0.15318100 | -0.35267600 | -1.39924000 |
| N | -2.04706800 | -1.16114900 | -1.10236000 |
| H | -2.64996900 | -1.60360400 | -0.41819100 |
| H | -2.52017500 | -0.40511100 | -1.58158400 |
| H | -0.69147500 | -2.52927700 | 0.68592200  |
| C | -2.14853800 | 1.11780900  | 1.03940700  |
| H | -2.65574500 | 0.17807800  | 1.28873100  |
| H | -2.20848000 | 1.75986700  | 1.92675400  |
| H | -2.71160300 | 1.60701500  | 0.23622200  |

1-CH<sub>3</sub>-8-OH-substituted

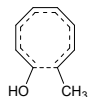

|   |             |             |             |
|---|-------------|-------------|-------------|
| C | -0.76199900 | -0.87559000 | -0.69385100 |
| C | -0.12244500 | -1.73748900 | 0.18888800  |
| C | 1.21439900  | -1.63355200 | 0.58547300  |
| C | 2.18554500  | -0.65983600 | 0.33672300  |
| C | 2.22546400  | 0.63080300  | -0.24242800 |
| C | 1.30232000  | 1.62696100  | -0.56788500 |
| C | -0.05692300 | 1.74247900  | -0.24406700 |
| C | -0.72738400 | 0.90739000  | 0.63425100  |
| H | -0.19852700 | -0.33754700 | -1.44321400 |
| H | -0.72250400 | -2.52335800 | 0.65117700  |
| H | 1.57333700  | -2.47559500 | 1.17450900  |
| H | 3.18080100  | -0.99596800 | 0.62637300  |
| H | 3.24934200  | 0.92826300  | -0.47057700 |
| H | 1.71582900  | 2.44647300  | -1.15339900 |
| H | -0.11892700 | 0.38946600  | 1.36878200  |
| C | -2.17185000 | 1.11637700  | 0.98690900  |
| H | -2.73829500 | 1.48813300  | 0.12767700  |
| H | -2.63906400 | 0.18390700  | 1.32267700  |
| H | -2.26973600 | 1.83968300  | 1.80597600  |
| H | -0.63494200 | 2.49400800  | -0.78416200 |
| O | -2.05340600 | -1.05733000 | -1.08055500 |
| H | -2.49281900 | -1.68408100 | -0.48545600 |

1-CH<sub>3</sub>-8-F-substituted

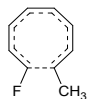

|   |             |             |             |
|---|-------------|-------------|-------------|
| C | -0.69687600 | -0.93769300 | -0.69403000 |
| C | -0.04838800 | -1.76048200 | 0.19007800  |
| C | 1.28979500  | -1.59246800 | 0.59244400  |
| C | 2.20396500  | -0.57339300 | 0.35244900  |
| C | 2.18575800  | 0.71989400  | -0.23997300 |
| C | 1.22869400  | 1.67643300  | -0.55937700 |
| C | -0.14328200 | 1.74740500  | -0.24775200 |



|   |             |             |             |
|---|-------------|-------------|-------------|
| C | -0.79519400 | 0.90946100  | 0.63172500  |
| H | -0.20408300 | -0.36298800 | -1.46545300 |
| H | -0.63629300 | -2.55028700 | 0.65300700  |
| H | 1.68728200  | -2.41784900 | 1.17964400  |
| H | 3.21268600  | -0.85051200 | 0.65796600  |
| H | 3.19591800  | 1.05417000  | -0.47707100 |
| H | 1.61379100  | 2.51457700  | -1.13817600 |
| H | -0.18321900 | 0.38930700  | 1.36211000  |
| C | -2.25492800 | 1.04412500  | 0.95233600  |
| H | -2.79313000 | 1.54674700  | 0.14329600  |
| H | -2.71726900 | 0.06477400  | 1.11174400  |
| H | -2.39169000 | 1.62590600  | 1.87226700  |
| H | -0.73785700 | 2.47589600  | -0.80075000 |
| F | -1.98482200 | -1.20993600 | -0.99622100 |

1-CH<sub>3</sub>-8-CHO-substituted

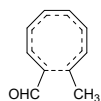

|   |             |             |             |
|---|-------------|-------------|-------------|
| C | -0.65184400 | -0.67861300 | -0.63905800 |
| C | -0.23725500 | -1.63216000 | 0.27664500  |
| C | 1.10135500  | -1.84727300 | 0.61994900  |
| C | 2.24479300  | -1.10964700 | 0.29528200  |
| C | 2.55087000  | 0.13538100  | -0.30643800 |
| C | 1.88647500  | 1.32528400  | -0.61852500 |
| C | 0.60887300  | 1.79714100  | -0.28367300 |
| C | -0.24073600 | 1.18838800  | 0.62404200  |
| H | 0.05591000  | -0.32205700 | -1.37773400 |
| H | -1.00572100 | -2.20965000 | 0.78863500  |
| H | 1.29917100  | -2.73382600 | 1.21952000  |
| H | 3.15745300  | -1.64853900 | 0.55077000  |
| H | 3.60711900  | 0.18646900  | -0.57003000 |
| H | 2.48416100  | 2.01176800  | -1.21643400 |
| H | 0.21206200  | 0.49650100  | 1.32665600  |
| C | -1.54956300 | 1.78591100  | 1.04619700  |
| H | -1.98003300 | 2.41200400  | 0.25812200  |
| H | -2.27530700 | 1.01082900  | 1.31238100  |
| H | -1.39721500 | 2.41170500  | 1.93478000  |
| H | 0.25328600  | 2.68422500  | -0.80868000 |
| C | -2.08101900 | -0.50629800 | -0.95281900 |
| H | -2.30710600 | 0.03901200  | -1.89056100 |
| O | -2.98693300 | -0.88589200 | -0.23713000 |

1-CH<sub>3</sub>-8-CN-substituted

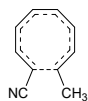

|   |             |             |             |
|---|-------------|-------------|-------------|
| C | -0.67102800 | -0.81302200 | -0.49145900 |
| C | -0.07968200 | -1.70001500 | 0.39588300  |
| C | 1.29816200  | -1.74909500 | 0.63803400  |
| C | 2.32706700  | -0.90810800 | 0.20859600  |
| C | 2.45045500  | 0.33966700  | -0.45104400 |
| C | 1.63808900  | 1.43951500  | -0.73595600 |
| C | 0.34719700  | 1.77994500  | -0.30512100 |
| C | -0.35468900 | 1.11617300  | 0.68555300  |

|   |             |             |             |
|---|-------------|-------------|-------------|
| H | -0.07796700 | -0.39910300 | -1.29708100 |
| H | -0.72221500 | -2.35432700 | 0.98114200  |
| H | 1.63087800  | -2.59079900 | 1.24173400  |
| H | 3.30840000  | -1.33942000 | 0.40673600  |
| H | 3.46982000  | 0.48973000  | -0.80585700 |
| H | 2.10270600  | 2.16394700  | -1.40305100 |
| H | 0.22572000  | 0.51161000  | 1.37587700  |
| C | -1.69931300 | 1.57573100  | 1.16543200  |
| H | -2.29114900 | 0.74519300  | 1.56150900  |
| H | -1.57312800 | 2.30571600  | 1.97498300  |
| H | -2.27088800 | 2.04875800  | 0.36152500  |
| H | -0.15114800 | 2.59548100  | -0.82949900 |
| C | -2.08759800 | -0.83624600 | -0.70858000 |
| N | -3.23757100 | -0.80629400 | -0.85372000 |

1-CH<sub>3</sub>-8-NO<sub>2</sub>-substituted

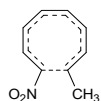

|   |             |             |             |
|---|-------------|-------------|-------------|
| C | -0.48960000 | -0.66796400 | -0.44032200 |
| C | 0.02626000  | -1.65602300 | 0.36134800  |
| C | 1.40248200  | -1.86081500 | 0.54019000  |
| C | 2.49372700  | -1.09625900 | 0.13289800  |
| C | 2.72028300  | 0.17477300  | -0.45817400 |
| C | 2.01602800  | 1.36156700  | -0.64925100 |
| C | 0.77597500  | 1.81181800  | -0.15997700 |
| C | 0.04144900  | 1.19233400  | 0.82915200  |
| H | 0.02714900  | -0.23649600 | -1.28256400 |
| H | -0.67308100 | -2.26343900 | 0.93022900  |
| H | 1.66639300  | -2.77147000 | 1.07289800  |
| H | 3.43450800  | -1.62779300 | 0.27635100  |
| H | 3.73706900  | 0.24336300  | -0.84365300 |
| H | 2.53301300  | 2.07290100  | -1.29167500 |
| H | 0.56200000  | 0.48789600  | 1.47186000  |
| C | -1.25219200 | 1.74588300  | 1.34466700  |
| H | -1.76554900 | 2.33478600  | 0.57884600  |
| H | -1.92261300 | 0.94861300  | 1.68229700  |
| H | -1.06029200 | 2.39370100  | 2.20940900  |
| H | 0.34724200  | 2.69060200  | -0.64134800 |
| N | -1.92719300 | -0.51070000 | -0.54773300 |
| O | -2.33025800 | 0.21469900  | -1.44563400 |
| O | -2.64498700 | -1.05590500 | 0.27917000  |

1-NH<sub>2</sub>-8-NH<sub>2</sub>-substituted

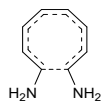

|   |             |             |             |
|---|-------------|-------------|-------------|
| C | 0.77926000  | -0.78351500 | 0.65656100  |
| C | 0.14401400  | -1.71895100 | -0.18019800 |
| C | -1.19124600 | -1.66672200 | -0.54553500 |
| C | -2.18264400 | -0.70371400 | -0.25469200 |
| C | -2.21613200 | 0.59067700  | 0.27911700  |
| C | -1.27779800 | 1.61238000  | 0.55427000  |
| C | 0.04318100  | 1.74919300  | 0.16864400  |
| C | 0.71459200  | 0.85220900  | -0.68727000 |

|   |             |             |             |
|---|-------------|-------------|-------------|
| H | 0.16744500  | -0.29653900 | 1.40621600  |
| H | 0.76139800  | -2.49861600 | -0.63109500 |
| H | -1.55039900 | -2.51905800 | -1.11897000 |
| H | -3.18407200 | -1.07328200 | -0.47587700 |
| H | -3.23379500 | 0.90042700  | 0.51699800  |
| H | -1.68041000 | 2.43726500  | 1.13947400  |
| H | 0.11069300  | 0.34540900  | -1.43178400 |
| N | 2.02265300  | 1.12079400  | -1.09439300 |
| H | 2.63427200  | 1.33386400  | -0.31076300 |
| H | 2.43380900  | 0.35135500  | -1.61246200 |
| H | 0.62365100  | 2.56445800  | 0.60170200  |
| N | 2.14026700  | -0.92093300 | 0.99280200  |
| H | 2.54865100  | -1.80838200 | 0.71819500  |
| H | 2.34896100  | -0.72526300 | 1.96412600  |

1- NH<sub>2</sub>-8-OH-substituted

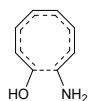

|   |             |             |             |
|---|-------------|-------------|-------------|
| C | 0.74382600  | -0.81578700 | 0.69433900  |
| C | 0.10180800  | -1.73202100 | -0.14078300 |
| C | -1.22885200 | -1.64381600 | -0.53772100 |
| C | -2.19129000 | -0.64949200 | -0.29235200 |
| C | -2.19776600 | 0.65093000  | 0.24124400  |
| C | -1.23953200 | 1.64050300  | 0.53079000  |
| C | 0.09915200  | 1.74346100  | 0.17883900  |
| C | 0.76737600  | 0.84958200  | -0.67133400 |
| H | 0.18028700  | -0.29151300 | 1.45404300  |
| H | 0.70648800  | -2.53025900 | -0.57762600 |
| H | -1.59746700 | -2.49537100 | -1.10592100 |
| H | -3.19654100 | -0.98339200 | -0.54896800 |
| H | -3.21063400 | 0.98871700  | 0.46003900  |
| H | -1.62931700 | 2.47919800  | 1.10486300  |
| H | 0.17591900  | 0.34161900  | -1.42509000 |
| N | 2.09397400  | 1.07468400  | -1.03278700 |
| H | 2.69552400  | 1.31819600  | -0.25228800 |
| H | 2.50984100  | 0.32726600  | -1.57514000 |
| H | 0.68915400  | 2.53411300  | 0.64263100  |
| O | 2.05383300  | -0.97411500 | 1.06244700  |
| H | 2.45992900  | -1.67859800 | 0.53525600  |

1- NH<sub>2</sub>-8-F-substituted

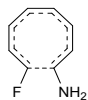

|   |             |             |             |
|---|-------------|-------------|-------------|
| C | 0.68961700  | -0.88070400 | 0.70495900  |
| C | 0.04329400  | -1.75342800 | -0.14257900 |
| C | -1.28878700 | -1.60651200 | -0.54835400 |
| C | -2.20261600 | -0.57551600 | -0.31051400 |
| C | -2.16235900 | 0.72576600  | 0.23777500  |
| C | -1.17686000 | 1.67928400  | 0.52523000  |
| C | 0.17467500  | 1.74415800  | 0.18996900  |
| C | 0.82278300  | 0.85387900  | -0.66883500 |
| H | 0.19423000  | -0.32621700 | 1.48981100  |
| H | 0.64099700  | -2.54992700 | -0.58273900 |

|   |             |             |             |
|---|-------------|-------------|-------------|
| H | -1.68925300 | -2.44180800 | -1.11855800 |
| H | -3.21862000 | -0.85917700 | -0.58519200 |
| H | -3.16297900 | 1.09339200  | 0.46335100  |
| H | -1.54241100 | 2.53180500  | 1.09526700  |
| H | 0.22545500  | 0.33014900  | -1.40672200 |
| N | 2.15354500  | 1.01157900  | -1.01089500 |
| H | 2.74818800  | 1.37045600  | -0.27250100 |
| H | 2.57746700  | 0.21172400  | -1.46424200 |
| H | 0.77951700  | 2.51212000  | 0.67227500  |
| F | 1.99712400  | -1.11945900 | 0.98440100  |

1- NH<sub>2</sub>-8-CHO-substituted

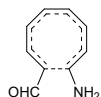

|   |             |             |             |
|---|-------------|-------------|-------------|
| C | -0.59412900 | -0.63880700 | -0.67701600 |
| C | -0.15168000 | -1.65502700 | 0.19794300  |
| C | 1.16841600  | -1.82395800 | 0.55111800  |
| C | 2.29418300  | -1.01434400 | 0.23023700  |
| C | 2.52564300  | 0.26365400  | -0.27065900 |
| C | 1.76495600  | 1.43863400  | -0.53737700 |
| C | 0.48872600  | 1.80549300  | -0.18540800 |
| C | -0.36074900 | 1.03370400  | 0.65389600  |
| H | 0.10062700  | -0.30953600 | -1.44329700 |
| H | -0.90641600 | -2.29469200 | 0.65416400  |
| H | 1.40794600  | -2.71148500 | 1.13298300  |
| H | 3.23111600  | -1.53767900 | 0.42329600  |
| H | 3.58002000  | 0.42042300  | -0.49483100 |
| H | 2.31530200  | 2.18739000  | -1.10440200 |
| H | 0.12231500  | 0.36946900  | 1.36128200  |
| N | -1.55890700 | 1.53646800  | 1.09989900  |
| H | -2.04988400 | 2.14870700  | 0.45749700  |
| H | -2.18888900 | 0.85016500  | 1.50427600  |
| H | 0.08732200  | 2.73266100  | -0.59333300 |
| C | -2.01437700 | -0.50403800 | -0.98533200 |
| H | -2.26942800 | -0.08418500 | -1.97865900 |
| O | -2.90545100 | -0.74479800 | -0.18533500 |

1-NH<sub>2</sub>-8-CN-substituted

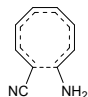

|   |             |             |             |
|---|-------------|-------------|-------------|
| C | -0.61918300 | -0.78459200 | -0.53704800 |
| C | -0.00204400 | -1.72847600 | 0.30198300  |
| C | 1.35554800  | -1.73739800 | 0.56550200  |
| C | 2.36272000  | -0.83211700 | 0.15424900  |
| C | 2.42466400  | 0.44357700  | -0.41109700 |
| C | 1.53368400  | 1.51986100  | -0.65240900 |
| C | 0.25408400  | 1.78268400  | -0.21132300 |
| C | -0.45611200 | 1.00242900  | 0.73033000  |
| H | -0.04027700 | -0.36569900 | -1.35139300 |
| H | -0.63227100 | -2.44121300 | 0.83082800  |
| H | 1.72036100  | -2.58027000 | 1.14829900  |
| H | 3.35969700  | -1.24624800 | 0.30593200  |
| H | 3.43744600  | 0.69076000  | -0.72664600 |

|   |             |             |             |
|---|-------------|-------------|-------------|
| H | 1.95839200  | 2.29361000  | -1.28954100 |
| H | 0.11839700  | 0.41153300  | 1.43522200  |
| N | -1.68123900 | 1.41249900  | 1.19081200  |
| H | -2.28691000 | 1.86469700  | 0.51413300  |
| H | -2.19200300 | 0.74669400  | 1.75754900  |
| H | -0.26416200 | 2.64084600  | -0.63762300 |
| C | -2.03382600 | -0.81017400 | -0.72927900 |
| N | -3.18960100 | -0.71956600 | -0.79827000 |

1-NH<sub>2</sub>-8-NO<sub>2</sub>-substituted

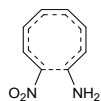

|   |             |             |             |
|---|-------------|-------------|-------------|
| C | -0.42807300 | -0.68681700 | -0.53243500 |
| C | 0.13174100  | -1.70202000 | 0.23419100  |
| C | 1.49541300  | -1.83457200 | 0.44249100  |
| C | 2.55312800  | -0.97264800 | 0.07981000  |
| C | 2.69555700  | 0.33874600  | -0.38710800 |
| C | 1.88250100  | 1.48711000  | -0.52856700 |
| C | 0.63119700  | 1.82733900  | -0.04831200 |
| C | -0.11940100 | 1.08411500  | 0.88196400  |
| H | 0.06763300  | -0.22137300 | -1.37001900 |
| H | -0.54861500 | -2.37732200 | 0.74777400  |
| H | 1.81038800  | -2.74595600 | 0.94514400  |
| H | 3.52210300  | -1.46251300 | 0.17837000  |
| H | 3.71602400  | 0.53523200  | -0.71281800 |
| H | 2.35139800  | 2.26674300  | -1.12689300 |
| H | 0.38770500  | 0.37455300  | 1.52685700  |
| N | -1.32454700 | 1.51778300  | 1.33225400  |
| H | -1.87770100 | 2.09249500  | 0.70478800  |
| H | -1.88132100 | 0.86764200  | 1.87501600  |
| H | 0.17491100  | 2.73649500  | -0.43674400 |
| N | -1.84329400 | -0.51913400 | -0.56118400 |
| O | -2.52146000 | -1.04776500 | 0.31996600  |
| O | -2.30354300 | 0.25975800  | -1.39261300 |

1-OH-8-OH-substituted

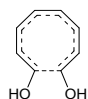

|   |             |             |             |
|---|-------------|-------------|-------------|
| C | -0.75381200 | 0.83051100  | 0.70116000  |
| C | -0.11740600 | 1.73893500  | -0.13754200 |
| C | 1.22900100  | 1.65587900  | -0.49914500 |
| C | 2.18092900  | 0.65952400  | -0.25465300 |
| C | 2.18113400  | -0.65909800 | 0.25450100  |
| C | 1.22944500  | -1.65558200 | 0.49936400  |
| C | -0.11695200 | -1.73895200 | 0.13776700  |
| C | -0.75340300 | -0.83077200 | -0.70116000 |
| H | -0.18975900 | 0.31086300  | 1.46459900  |
| H | -0.72490000 | 2.51685600  | -0.60224400 |
| H | 1.60997800  | 2.51489400  | -1.04783800 |
| H | 3.19109700  | 0.99389200  | -0.48994600 |
| H | 3.19143500  | -0.99321800 | 0.48958500  |
| H | 1.61064000  | -2.51443400 | 1.04815800  |
| H | -0.18925500 | -0.31105400 | -1.46450000 |

|   |             |             |             |
|---|-------------|-------------|-------------|
| O | -2.07139000 | -0.92611700 | -1.03265500 |
| H | -2.55143600 | -1.37879300 | -0.32149200 |
| H | -0.72430600 | -2.51698700 | 0.60244300  |
| O | -2.07180900 | 0.92559900  | 1.03237200  |
| H | -2.55151700 | 1.37946000  | 0.32174200  |

1-OH-8-F-substituted

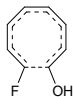

|   |             |             |             |
|---|-------------|-------------|-------------|
| C | 0.69127500  | -0.89517000 | 0.68850100  |
| C | 0.04487400  | -1.75891100 | -0.16332600 |
| C | -1.29634600 | -1.60013600 | -0.54287900 |
| C | -2.19235600 | -0.56253900 | -0.28807100 |
| C | -2.13010800 | 0.73992600  | 0.26845100  |
| C | -1.13943100 | 1.68781300  | 0.53224900  |
| C | 0.21146800  | 1.74069300  | 0.16865900  |
| C | 0.82112000  | 0.83903900  | -0.69214200 |
| H | 0.18366500  | -0.33372700 | 1.46182200  |
| H | 0.63777900  | -2.54528900 | -0.62542700 |
| H | -1.71413300 | -2.42849800 | -1.11069100 |
| H | -3.21574600 | -0.83120300 | -0.54924300 |
| H | -3.12370700 | 1.10911100  | 0.52076700  |
| H | -1.48775600 | 2.54797300  | 1.10072900  |
| H | 0.23824100  | 0.32174000  | -1.44329800 |
| O | 2.12865900  | 0.90088100  | -1.03550000 |
| H | 2.63051200  | 1.39124600  | -0.36624200 |
| H | 0.83756500  | 2.49663600  | 0.64424300  |
| F | 1.99125900  | -1.11992400 | 0.98030000  |

1-OH-8-CHO-substituted

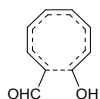

|   |             |             |             |
|---|-------------|-------------|-------------|
| C | -0.66815700 | -0.61708600 | -0.62513100 |
| C | -0.26247800 | -1.62665800 | 0.24669900  |
| C | 1.06724400  | -1.87161700 | 0.56838300  |
| C | 2.22007300  | -1.14052900 | 0.22516600  |
| C | 2.51925700  | 0.11425400  | -0.33418600 |
| C | 1.84477700  | 1.32346500  | -0.58762800 |
| C | 0.59814500  | 1.79823000  | -0.19925100 |
| C | -0.26531400 | 1.13385800  | 0.67835500  |
| H | 0.03321300  | -0.27799700 | -1.37900600 |
| H | -1.03950200 | -2.20538300 | 0.74410700  |
| H | 1.26364500  | -2.76990000 | 1.15012500  |
| H | 3.13119800  | -1.70296000 | 0.43071700  |
| H | 3.57059900  | 0.18183800  | -0.61107200 |
| H | 2.42875900  | 2.02951100  | -1.17512400 |
| H | 0.13160900  | 0.43946400  | 1.40674200  |
| O | -1.42961500 | 1.66837700  | 1.10070800  |
| H | -1.71678600 | 2.38313400  | 0.51098000  |
| H | 0.25333900  | 2.73679000  | -0.63458200 |
| C | -2.09728600 | -0.40701300 | -0.91260700 |
| H | -2.32019800 | 0.21793500  | -1.80248300 |

O -3.00456500 -0.82760800 -0.22560800

1-OH-8-CN-substituted

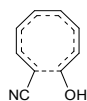

|   |             |             |             |
|---|-------------|-------------|-------------|
| C | -0.63150300 | -0.80382800 | -0.50726100 |
| C | -0.01726800 | -1.73350200 | 0.32946600  |
| C | 1.35817700  | -1.74292900 | 0.54810400  |
| C | 2.33764000  | -0.83132400 | 0.12150100  |
| C | 2.37836600  | 0.44880000  | -0.46754700 |
| C | 1.49567500  | 1.52256300  | -0.67695300 |
| C | 0.21854400  | 1.78587700  | -0.19076600 |
| C | -0.41738000 | 1.00453800  | 0.77530800  |
| H | -0.04507900 | -0.37347800 | -1.31056400 |
| H | -0.63804500 | -2.42790300 | 0.89118200  |
| H | 1.74336200  | -2.58885700 | 1.11287800  |
| H | 3.34354600  | -1.22699300 | 0.26199200  |
| H | 3.37966500  | 0.68206600  | -0.82730300 |
| H | 1.90236800  | 2.30085400  | -1.31976200 |
| H | 0.17401300  | 0.42010000  | 1.46938100  |
| O | -1.63041100 | 1.28709500  | 1.28185100  |
| H | -2.17576900 | 1.77290800  | 0.64163800  |
| H | -0.33142200 | 2.62504300  | -0.61585200 |
| C | -2.04763900 | -0.78664900 | -0.70958400 |
| N | -3.19386100 | -0.66596900 | -0.84171400 |

1-OH-8-NO<sub>2</sub>-substituted

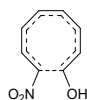

|   |             |             |             |
|---|-------------|-------------|-------------|
| C | -0.46768600 | -0.66348800 | -0.47719400 |
| C | 0.06616700  | -1.70252700 | 0.25346500  |
| C | 1.44093100  | -1.88127700 | 0.42381900  |
| C | 2.50762100  | -1.05148900 | 0.06127700  |
| C | 2.68666500  | 0.26124200  | -0.42991700 |
| C | 1.93154300  | 1.43422400  | -0.54968700 |
| C | 0.68945500  | 1.82215700  | -0.04348200 |
| C | -0.04407100 | 1.11045900  | 0.89703600  |
| H | 0.03913300  | -0.17367200 | -1.29267300 |
| H | -0.62234000 | -2.35913000 | 0.77976400  |
| H | 1.73585500  | -2.81125600 | 0.90383500  |
| H | 3.46610300  | -1.56095000 | 0.16119400  |
| H | 3.70368900  | 0.40502200  | -0.79200100 |
| H | 2.42238900  | 2.20228600  | -1.14480400 |
| H | 0.43647600  | 0.41606100  | 1.57637000  |
| O | -1.24290700 | 1.50588800  | 1.34855500  |
| H | -1.70359500 | 2.04080800  | 0.67842300  |
| H | 0.24131700  | 2.72885800  | -0.44783600 |
| N | -1.89906400 | -0.47042500 | -0.52247200 |
| O | -2.62997700 | -1.21358200 | 0.10834700  |
| O | -2.28828200 | 0.51133800  | -1.15401200 |

1-F-8-F-substituted

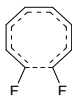

|   |             |             |             |
|---|-------------|-------------|-------------|
| C | 0.76788300  | -0.90832400 | 0.67696400  |
| C | 0.13167500  | -1.76313600 | -0.18608700 |
| C | -1.21853500 | -1.63834700 | -0.56010000 |
| C | -2.15674500 | -0.64723200 | -0.29416800 |
| C | -2.15688000 | 0.64685000  | 0.29416800  |
| C | -1.21887500 | 1.63814400  | 0.56012100  |
| C | 0.13131800  | 1.76318700  | 0.18609500  |
| C | 0.76752500  | 0.90852000  | -0.67693700 |
| H | 0.26386900  | -0.34499000 | 1.45133400  |
| H | 0.73891600  | -2.53033900 | -0.66142700 |
| H | -1.60422000 | -2.47481300 | -1.13899400 |
| H | -3.16550600 | -0.95413800 | -0.56891200 |
| H | -3.16567800 | 0.95347700  | 0.56909000  |
| H | -1.60468600 | 2.47443600  | 1.13918500  |
| H | 0.26350600  | 0.34500100  | -1.45117300 |
| F | 2.06929300  | 1.11098500  | -0.94644100 |
| H | 0.73848500  | 2.53032000  | 0.66163200  |
| F | 2.06972000  | -1.11064400 | 0.94632200  |

#### 1-F-8-CHO-substituted

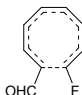

|   |             |             |             |
|---|-------------|-------------|-------------|
| C | -0.73230700 | -0.60750400 | -0.62930600 |
| C | -0.34105500 | -1.61078900 | 0.23742300  |
| C | 0.99081500  | -1.91131300 | 0.55106200  |
| C | 2.16828200  | -1.23420000 | 0.23102400  |
| C | 2.53127100  | 0.01224800  | -0.33752300 |
| C | 1.93205100  | 1.24940100  | -0.57119400 |
| C | 0.69744000  | 1.79594200  | -0.18865100 |
| C | -0.19498900 | 1.19978000  | 0.66962900  |
| H | -0.03441700 | -0.24717800 | -1.37605000 |
| H | -1.12848600 | -2.15893600 | 0.75305400  |
| H | 1.14394400  | -2.82672200 | 1.11946400  |
| H | 3.05354500  | -1.82913300 | 0.45596100  |
| H | 3.58012000  | 0.01436600  | -0.63197400 |
| H | 2.55568000  | 1.93242400  | -1.14449200 |
| H | 0.07156400  | 0.48536300  | 1.43666600  |
| F | -1.33683900 | 1.84991900  | 0.94781600  |
| H | 0.38557100  | 2.73620700  | -0.63802900 |
| C | -2.17052700 | -0.34289500 | -0.86184700 |
| H | -2.40707700 | 0.33714200  | -1.70293100 |
| O | -3.05934700 | -0.79960200 | -0.17571500 |

#### 1-F-8-CN-substituted

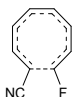

|   |             |             |             |
|---|-------------|-------------|-------------|
| C | -0.73700800 | -0.76614600 | -0.47860500 |
|---|-------------|-------------|-------------|



|   |             |             |             |
|---|-------------|-------------|-------------|
| C | -0.15972200 | -1.69911100 | 0.36940600  |
| C | 1.21991200  | -1.80075300 | 0.58263800  |
| C | 2.26765500  | -0.98968300 | 0.14225000  |
| C | 2.41534300  | 0.26607000  | -0.49549800 |
| C | 1.63875400  | 1.40568500  | -0.70913100 |
| C | 0.38552200  | 1.79466800  | -0.21753200 |
| C | -0.31771200 | 1.10144100  | 0.74068100  |
| H | -0.14604800 | -0.35373600 | -1.28778800 |
| H | -0.81348100 | -2.34252500 | 0.95403900  |
| H | 1.53575900  | -2.66479800 | 1.16303600  |
| H | 3.23809400  | -1.45836500 | 0.30470800  |
| H | 3.42488500  | 0.38916700  | -0.88546300 |
| H | 2.10637700  | 2.13851100  | -1.36330700 |
| H | 0.13989100  | 0.46116500  | 1.48400200  |
| F | -1.50524200 | 1.57993900  | 1.13080900  |
| H | -0.10272100 | 2.66187700  | -0.65556000 |
| C | -2.15907700 | -0.72345900 | -0.65930100 |
| N | -3.30822700 | -0.65471700 | -0.79148500 |

#### 1-F-8-NO<sub>2</sub>-substituted

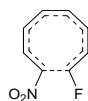

|   |             |             |             |
|---|-------------|-------------|-------------|
| C | 0.53456700  | -0.63163200 | 0.44247600  |
| C | 0.03522300  | -1.65938300 | -0.31609300 |
| C | -1.33858600 | -1.90512400 | -0.46822800 |
| C | -2.44005300 | -1.15698200 | -0.06190300 |
| C | -2.68197100 | 0.12585400  | 0.49788500  |
| C | -2.00831600 | 1.33792400  | 0.61414400  |
| C | -0.80270000 | 1.81278000  | 0.06773800  |
| C | -0.06907700 | 1.14736200  | -0.87938800 |
| H | 0.02160400  | -0.19091000 | 1.28355900  |
| H | 0.74301100  | -2.25962000 | -0.88258900 |
| H | -1.58756800 | -2.83671100 | -0.97083300 |
| H | -3.37119200 | -1.71283100 | -0.17096700 |
| H | -3.68737100 | 0.18393700  | 0.91270500  |
| H | -2.52650700 | 2.06638000  | 1.23433000  |
| H | -0.47085000 | 0.41811000  | -1.57126100 |
| F | 1.07412400  | 1.69186200  | -1.30862500 |
| H | -0.38161400 | 2.73590300  | 0.45810100  |
| N | 1.97327200  | -0.42239600 | 0.50914600  |
| O | 2.68268400  | -0.95773700 | -0.32699500 |
| O | 2.36806000  | 0.32035700  | 1.39459200  |

#### 1-CHO-8-CHO-substituted

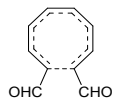

|   |             |             |             |
|---|-------------|-------------|-------------|
| C | 0.32464300  | 0.95730200  | -0.61447200 |
| C | -0.37219700 | 1.79195100  | 0.24353900  |
| C | -1.72840500 | 1.66266700  | 0.55771600  |
| C | -2.65407400 | 0.65347800  | 0.27113900  |
| C | -2.65437100 | -0.65262700 | -0.27118400 |
| C | -1.72915000 | -1.66225000 | -0.55764000 |
| C | -0.37295600 | -1.79193800 | -0.24358400 |

|   |             |             |             |
|---|-------------|-------------|-------------|
| C | 0.32406600  | -0.95740100 | 0.61438100  |
| H | -0.21575400 | 0.38913600  | -1.36232500 |
| H | 0.19441300  | 2.57706200  | 0.74196100  |
| H | -2.15271800 | 2.49596100  | 1.11514100  |
| H | -3.66988600 | 0.96666400  | 0.51167700  |
| H | -3.67032000 | -0.96533100 | -0.51177300 |
| H | -2.15381400 | -2.49542800 | -1.11497100 |
| H | -0.21622600 | -0.38920700 | 1.36228700  |
| C | 1.76641000  | -1.20755300 | 0.87595600  |
| H | 2.20526700  | -0.66836800 | 1.73568300  |
| O | 2.45294800  | -1.93003500 | 0.18585200  |
| H | 0.19339600  | -2.57726000 | -0.74195800 |
| C | 1.76703400  | 1.20719900  | -0.87602400 |
| H | 2.20563300  | 0.66830300  | -1.73607700 |
| O | 2.45380200  | 1.92922200  | -0.18567800 |

1-CHO-8-CN-substituted

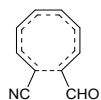

|   |             |             |             |
|---|-------------|-------------|-------------|
| C | 0.28874500  | 1.09094000  | -0.46349800 |
| C | -0.51537800 | 1.80678600  | 0.41488500  |
| C | -1.86208800 | 1.52212200  | 0.65553500  |
| C | -2.67948500 | 0.46619600  | 0.23737100  |
| C | -2.53859900 | -0.77843700 | -0.41774100 |
| C | -1.51225700 | -1.67654900 | -0.73257800 |
| C | -0.17301000 | -1.71724200 | -0.33658500 |
| C | 0.38598400  | -0.89259400 | 0.62618600  |
| H | -0.17042600 | 0.54031200  | -1.27532500 |
| H | -0.05841500 | 2.60844300  | 0.99067800  |
| H | -2.38111800 | 2.26414400  | 1.25881900  |
| H | -3.72843000 | 0.67045700  | 0.45025100  |
| H | -3.50880000 | -1.15051400 | -0.74592800 |
| H | -1.82605800 | -2.48668600 | -1.38816500 |
| H | -0.25448300 | -0.43753400 | 1.37291600  |
| C | 1.82928900  | -1.02568400 | 0.96525100  |
| H | 2.18166800  | -0.42798100 | 1.82698400  |
| O | 2.59814000  | -1.71770100 | 0.33820400  |
| H | 0.49665800  | -2.40322300 | -0.85303500 |
| C | 1.64652200  | 1.50591200  | -0.68560000 |
| N | 2.74942300  | 1.82221300  | -0.84602600 |

1-CHO-8-NO<sub>2</sub>-substituted

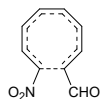

|   |             |             |             |
|---|-------------|-------------|-------------|
| C | 0.21834700  | -0.90363900 | 0.40250700  |
| C | -0.46185700 | -1.73805100 | -0.44799400 |
| C | -1.85061200 | -1.67500500 | -0.64182200 |
| C | -2.79708600 | -0.74702000 | -0.21272300 |
| C | -2.81694400 | 0.51409600  | 0.44020200  |
| C | -1.92952900 | 1.55493800  | 0.71001100  |
| C | -0.61913000 | 1.79372200  | 0.26646600  |
| C | 0.01084000  | 1.07649200  | -0.72934100 |
| H | -0.21885800 | -0.43386200 | 1.27091200  |

|   |             |             |             |
|---|-------------|-------------|-------------|
| H | 0.11972800  | -2.43595500 | -1.04537000 |
| H | -2.26743300 | -2.49805500 | -1.21809700 |
| H | -3.81209200 | -1.09798800 | -0.39720200 |
| H | -3.81776800 | 0.73429500  | 0.81088500  |
| H | -2.33554500 | 2.31414400  | 1.37582600  |
| H | -0.58210600 | 0.52176400  | -1.44822200 |
| C | 1.41391300  | 1.40176500  | -1.11171900 |
| H | 1.78506100  | 0.94621500  | -2.04740600 |
| O | 2.13197600  | 2.10101600  | -0.43324800 |
| H | -0.03718600 | 2.56014200  | 0.77596800  |
| N | 1.66191500  | -1.06137900 | 0.54253600  |
| O | 2.14653900  | -0.69048300 | 1.59629000  |
| O | 2.28712800  | -1.51613800 | -0.40411300 |

#### 1-CN-8-CN-substituted

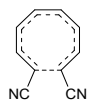

|   |             |             |             |
|---|-------------|-------------|-------------|
| C | 0.36885900  | 1.01666300  | -0.47832000 |
| C | -0.29388900 | 1.73357900  | 0.51196400  |
| C | -1.63840500 | 1.54008400  | 0.83346900  |
| C | -2.56732500 | 0.59279700  | 0.38393200  |
| C | -2.56731000 | -0.59270600 | -0.38407300 |
| C | -1.63843300 | -1.54015600 | -0.83336300 |
| C | -0.29392200 | -1.73367600 | -0.51183100 |
| C | 0.36882900  | -1.01672000 | 0.47842300  |
| H | -0.20897300 | 0.58031700  | -1.28462700 |
| H | 0.27730300  | 2.44043200  | 1.10888200  |
| H | -2.04986900 | 2.26084100  | 1.53670300  |
| H | -3.58121800 | 0.85762000  | 0.68228500  |
| H | -3.58117500 | -0.85739000 | -0.68264200 |
| H | -2.04994300 | -2.26104400 | -1.53643700 |
| H | -0.20892800 | -0.58051100 | 1.28485800  |
| C | 1.73750300  | -1.31435500 | 0.79336100  |
| N | 2.84622400  | -1.53403900 | 1.04625100  |
| H | 0.27724500  | -2.44061400 | -1.10867700 |
| C | 1.73737200  | 1.31439500  | -0.79341100 |
| N | 2.84604600  | 1.53417000  | -1.04643000 |

#### 1-CN-8-NO<sub>2</sub>-substituted

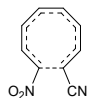

|   |             |             |             |
|---|-------------|-------------|-------------|
| C | 0.26441000  | -0.84266900 | 0.40374800  |
| C | -0.31694000 | -1.67015700 | -0.52742700 |
| C | -1.69094300 | -1.66300300 | -0.79800000 |
| C | -2.70959200 | -0.81958900 | -0.34985800 |
| C | -2.82859900 | 0.38328500  | 0.38947900  |
| C | -2.01444700 | 1.45004500  | 0.77674600  |
| C | -0.71197200 | 1.80578500  | 0.40562900  |
| C | 0.00073100  | 1.16871700  | -0.59778500 |
| H | -0.25360400 | -0.45237200 | 1.26703100  |
| H | 0.33650800  | -2.30306800 | -1.12206200 |
| H | -2.03231700 | -2.45940800 | -1.45521400 |
| H | -3.69359500 | -1.21016800 | -0.60758000 |

|   |             |             |             |
|---|-------------|-------------|-------------|
| H | -3.85521500 | 0.52440200  | 0.72600800  |
| H | -2.48959600 | 2.13303500  | 1.47771100  |
| H | -0.53455100 | 0.64003500  | -1.37807600 |
| C | 1.32396800  | 1.60633800  | -0.94156700 |
| N | 2.40312200  | 1.92863200  | -1.21145300 |
| H | -0.21340300 | 2.58243300  | 0.98014800  |
| N | 1.70537400  | -0.92559800 | 0.63284300  |
| O | 2.11360900  | -0.38942300 | 1.65002800  |
| O | 2.39596600  | -1.48415700 | -0.20046300 |

#### 1-NO<sub>2</sub>-8-NO<sub>2</sub>-substituted

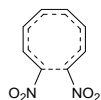

|   |             |             |             |
|---|-------------|-------------|-------------|
| C | -0.02183900 | 1.06388000  | -0.39967000 |
| C | -0.64206200 | 1.67903800  | 0.65650800  |
| C | -1.99627100 | 1.46339000  | 0.96307200  |
| C | -2.91654700 | 0.55679300  | 0.44223300  |
| C | -2.91649200 | -0.55704400 | -0.44217600 |
| C | -1.99611000 | -1.46351700 | -0.96305500 |
| C | -0.64187900 | -1.67905100 | -0.65650800 |
| C | -0.02164800 | -1.06387000 | 0.39966100  |
| H | -0.53898400 | 0.71730500  | -1.28319500 |
| H | -0.03850000 | 2.29902300  | 1.31453000  |
| H | -2.40460200 | 2.12493100  | 1.72345600  |
| H | -3.92984400 | 0.77864700  | 0.77539600  |
| H | -3.92978600 | -0.77911100 | -0.77520700 |
| H | -2.40440900 | -2.12514300 | -1.72338300 |
| H | -0.53878400 | -0.71735800 | 1.28321400  |
| N | 1.38392800  | -1.35378700 | 0.67786200  |
| O | 1.74628200  | -1.18443800 | 1.82904300  |
| O | 2.08935700  | -1.71700600 | -0.24710900 |
| H | -0.03823700 | -2.29886100 | -1.31462800 |
| N | 1.38372600  | 1.35384500  | -0.67788500 |
| O | 2.08919000  | 1.71684300  | 0.24715800  |
| O | 1.74600200  | 1.18490700  | -1.82914300 |

#### 5.3.9 2,3-substituted

##### 2-CH<sub>3</sub>-3-CH<sub>3</sub>-substituted

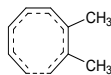

|   |             |             |             |
|---|-------------|-------------|-------------|
| C | -1.37849100 | -1.37811700 | 0.84968400  |
| C | 0.02726100  | -1.25439100 | -0.97982000 |
| C | -2.44767300 | -0.74654300 | 0.26969300  |
| C | -2.46027700 | 0.62047800  | -0.09427100 |
| C | -1.43548400 | 1.54945200  | -0.17420900 |
| C | -0.00980000 | 1.60023700  | -0.04385700 |
| C | 1.08187400  | 0.73980300  | -0.04173500 |
| C | 1.09424000  | -0.65534900 | -0.36243300 |
| H | -0.63161800 | -0.79727200 | 1.37598100  |
| H | -1.42869800 | -2.43549100 | 1.09576300  |
| H | -0.71462900 | -0.65013600 | -1.48615400 |
| H | 0.07365500  | -2.30392800 | -1.25955500 |
| H | -3.32207000 | -1.33538800 | -0.00316600 |

|   |             |             |             |
|---|-------------|-------------|-------------|
| H | -3.43774700 | 1.01741400  | -0.36425200 |
| H | -1.82240200 | 2.55188700  | -0.35949300 |
| C | 2.26561900  | -1.50030300 | 0.08198800  |
| H | 2.11916400  | -2.54419300 | -0.20763500 |
| H | 3.20496800  | -1.15769100 | -0.36655100 |
| H | 2.40064000  | -1.46531800 | 1.17087200  |
| H | 0.30212700  | 2.63939500  | 0.06430500  |
| C | 2.41928000  | 1.35111300  | 0.33341900  |
| H | 2.80731000  | 0.91571800  | 1.26252100  |
| H | 3.17579200  | 1.17759300  | -0.44074600 |
| H | 2.33421200  | 2.42912400  | 0.48736300  |

2-CH<sub>3</sub>-3-NH<sub>2</sub>-substituted

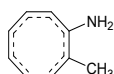

|   |             |             |             |
|---|-------------|-------------|-------------|
| C | 1.34482700  | -1.42348300 | -0.83438800 |
| C | -0.07219200 | -1.24453400 | 0.96458700  |
| C | 2.41837700  | -0.79436300 | -0.25454800 |
| C | 2.45558000  | 0.57271000  | 0.09966100  |
| C | 1.44873500  | 1.52794700  | 0.16464900  |
| C | 0.03248600  | 1.61528000  | 0.05451200  |
| C | -1.07596000 | 0.76471700  | 0.03156000  |
| C | -1.13255400 | -0.62544600 | 0.35479100  |
| H | 0.60961900  | -0.84320200 | -1.37683500 |
| H | 1.39446700  | -2.48200100 | -1.07596500 |
| H | 0.67821200  | -0.65687200 | 1.47795200  |
| H | -0.14156500 | -2.29303500 | 1.24218100  |
| H | 3.28469000  | -1.39274800 | 0.02523700  |
| H | 3.43795800  | 0.95137900  | 0.37626300  |
| H | 1.86054600  | 2.52157300  | 0.34390000  |
| C | -2.33349400 | -1.42377800 | -0.09085300 |
| H | -2.14583900 | -2.49360300 | 0.03365400  |
| H | -3.22754800 | -1.18513200 | 0.50115800  |
| H | -2.57992000 | -1.22413800 | -1.13957900 |
| H | -0.27178400 | 2.66057500  | -0.02385400 |
| N | -2.29007800 | 1.32288300  | -0.41331200 |
| H | -2.26919800 | 2.32810700  | -0.53311200 |
| H | -3.11392600 | 1.03461700  | 0.10235800  |

2-CH<sub>3</sub>-3-OH-substituted

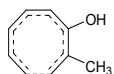

|   |             |             |             |
|---|-------------|-------------|-------------|
| C | -1.30589600 | -1.43765900 | 0.84004100  |
| C | 0.11175600  | -1.26318300 | -0.94772800 |
| C | -2.39078200 | -0.83385100 | 0.25340400  |
| C | -2.45562100 | 0.52991900  | -0.11091900 |
| C | -1.47143100 | 1.50645700  | -0.17478300 |
| C | -0.05733400 | 1.61074400  | -0.04220000 |
| C | 1.05037100  | 0.77001700  | -0.03195200 |
| C | 1.16140900  | -0.61012000 | -0.35331100 |
| H | -0.58549100 | -0.84010300 | 1.38354800  |
| H | -1.33720600 | -2.49453100 | 1.09105500  |
| H | -0.65264600 | -0.69969600 | -1.46695800 |
| H | 0.21173600  | -2.31071200 | -1.21918600 |
| H | -3.24338800 | -1.45149200 | -0.02575100 |

|   |             |             |             |
|---|-------------|-------------|-------------|
| H | -3.44429800 | 0.88492900  | -0.39596900 |
| H | -1.89727000 | 2.49230800  | -0.36184500 |
| C | 2.40618300  | -1.34088600 | 0.07964600  |
| H | 2.33156400  | -2.40216100 | -0.17164200 |
| H | 3.29173300  | -0.92788800 | -0.41394300 |
| H | 2.57314300  | -1.24297100 | 1.15854700  |
| H | 0.24009000  | 2.65863100  | 0.04661700  |
| O | 2.26127900  | 1.31622500  | 0.33010700  |
| H | 2.12988000  | 2.21525200  | 0.66148700  |

#### 2-CH<sub>3</sub>-3-F-substituted

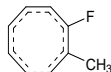

|   |             |             |             |
|---|-------------|-------------|-------------|
| C | 1.27492100  | -1.45456500 | -0.83884300 |
| C | -0.17685800 | -1.28593400 | 0.95187200  |
| C | 2.36211400  | -0.87985200 | -0.23202600 |
| C | 2.46204300  | 0.48574900  | 0.12598700  |
| C | 1.51080200  | 1.49177200  | 0.16406000  |
| C | 0.09934000  | 1.61609500  | 0.00506600  |
| C | -0.99712000 | 0.78269800  | 0.03217900  |
| C | -1.18902300 | -0.58363600 | 0.34991700  |
| H | 0.57041800  | -0.83802600 | -1.38277000 |
| H | 1.28344100  | -2.51137500 | -1.09109400 |
| H | 0.60619800  | -0.76001900 | 1.48193600  |
| H | -0.32047700 | -2.33275100 | 1.20542900  |
| H | 3.19340500  | -1.51924800 | 0.06128900  |
| H | 3.45856000  | 0.81158000  | 0.41902800  |
| H | 1.95612300  | 2.47045100  | 0.33987800  |
| C | -2.46635900 | -1.24338900 | -0.10402700 |
| H | -2.45097300 | -2.30772600 | 0.14342500  |
| H | -3.33430200 | -0.78849600 | 0.38338100  |
| H | -2.61345600 | -1.13535700 | -1.18457800 |
| H | -0.21344200 | 2.64906800  | -0.14137800 |
| F | -2.15718400 | 1.40980800  | -0.32885100 |

#### 2-CH<sub>3</sub>-3-CHO-substituted

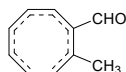

|   |             |             |             |
|---|-------------|-------------|-------------|
| C | 1.91385900  | 0.97859600  | 0.94182000  |
| C | 0.59721800  | 1.41637600  | -0.97340300 |
| C | 2.77279400  | 0.10915200  | 0.32781100  |
| C | 2.40396200  | -1.18732200 | -0.10402300 |
| C | 1.15700900  | -1.77446700 | -0.24063400 |
| C | -0.21344500 | -1.38581700 | -0.14244900 |
| C | -0.98496200 | -0.22979200 | -0.13033900 |
| C | -0.59798500 | 1.13328000  | -0.37547200 |
| H | 1.00786100  | 0.60440500  | 1.40274600  |
| H | 2.24516800  | 1.96668800  | 1.24873400  |
| H | 1.14299600  | 0.64176800  | -1.49732200 |
| H | 0.88323000  | 2.44480100  | -1.17924800 |
| H | 3.78533700  | 0.43699600  | 0.09951400  |
| H | 3.23384900  | -1.83905300 | -0.37309700 |
| H | 1.23163700  | -2.84059900 | -0.45300100 |
| C | -1.45574800 | 2.27993200  | 0.12245300  |
| H | -0.88319400 | 3.21056900  | 0.08148000  |

|   |             |             |             |
|---|-------------|-------------|-------------|
| H | -2.34984500 | 2.42462500  | -0.49409800 |
| H | -1.78725700 | 2.13267800  | 1.15612200  |
| H | -0.85504600 | -2.26484800 | -0.07946800 |
| C | -2.43719300 | -0.47729600 | 0.12950900  |
| H | -3.08665500 | 0.41619700  | 0.11798400  |
| O | -2.93764200 | -1.56376000 | 0.32975300  |

2-CH<sub>3</sub>-3-CN-substituted

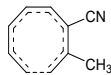

|   |             |             |             |
|---|-------------|-------------|-------------|
| C | 1.72966100  | 1.15671500  | 0.94565800  |
| C | 0.39343500  | 1.38265000  | -0.98097100 |
| C | 2.70741300  | 0.40458800  | 0.35275400  |
| C | 2.53340900  | -0.93418500 | -0.07150900 |
| C | 1.38933900  | -1.70013700 | -0.21798800 |
| C | -0.02434700 | -1.52159400 | -0.12903000 |
| C | -0.93605900 | -0.47017200 | -0.14266200 |
| C | -0.76004400 | 0.92970700  | -0.40563600 |
| H | 0.87890900  | 0.67224600  | 1.40880200  |
| H | 1.92403400  | 2.18338800  | 1.24314000  |
| H | 1.06007600  | 0.69473600  | -1.48485000 |
| H | 0.51663100  | 2.43892200  | -1.20402700 |
| H | 3.66741800  | 0.86848600  | 0.13368400  |
| H | 3.45149600  | -1.46002800 | -0.32840600 |
| H | 1.62068400  | -2.74425800 | -0.42481200 |
| C | -1.83030100 | 1.89048900  | 0.05068400  |
| H | -1.54113400 | 2.92011300  | -0.17290500 |
| H | -2.78194800 | 1.68537200  | -0.45144700 |
| H | -2.01439200 | 1.80462400  | 1.12801400  |
| H | -0.52507200 | -2.48595700 | -0.05370100 |
| C | -2.29459500 | -0.86942800 | 0.15956900  |
| N | -3.38631100 | -1.16992100 | 0.40589800  |

2-CH<sub>3</sub>-3-NO<sub>2</sub>-substituted

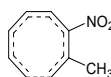

|   |             |             |             |
|---|-------------|-------------|-------------|
| C | 2.12614400  | 1.02707100  | 0.95311700  |
| C | 0.78038100  | 1.46502300  | -0.91051500 |
| C | 3.02092600  | 0.22517000  | 0.29844500  |
| C | 2.71837600  | -1.07650500 | -0.16751000 |
| C | 1.50490200  | -1.72457900 | -0.31074000 |
| C | 0.11640700  | -1.41153000 | -0.18836300 |
| C | -0.68140200 | -0.28524500 | -0.15817200 |
| C | -0.40570100 | 1.10653000  | -0.33364200 |
| H | 1.25475400  | 0.59037400  | 1.42551700  |
| H | 2.41108500  | 2.02124800  | 1.28588400  |
| H | 1.34643300  | 0.75145700  | -1.49601800 |
| H | 1.02457300  | 2.51544600  | -1.04461300 |
| H | 4.00915300  | 0.61667500  | 0.06438200  |
| H | 3.57800200  | -1.67432000 | -0.46553500 |
| H | 1.62842100  | -2.77666500 | -0.56273200 |
| C | -1.30015200 | 2.17506700  | 0.25708800  |
| H | -0.69852800 | 3.06207400  | 0.47740200  |
| H | -2.09187500 | 2.45877800  | -0.44027500 |

|   |             |             |             |
|---|-------------|-------------|-------------|
| H | -1.78199800 | 1.84945000  | 1.18371800  |
| H | -0.48007900 | -2.31919700 | -0.14114800 |
| N | -2.11566800 | -0.61478600 | 0.07695100  |
| O | -2.94486300 | 0.09416200  | -0.46842900 |
| O | -2.38883100 | -1.56889200 | 0.78549300  |

2- NH<sub>2</sub>-3-CH<sub>3</sub>-substituted

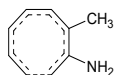

|   |             |             |             |
|---|-------------|-------------|-------------|
| C | -1.42628500 | -1.35299600 | 0.86553200  |
| C | 0.03270700  | -1.27269800 | -1.01793200 |
| C | -2.46492300 | -0.68048500 | 0.28878700  |
| C | -2.42495300 | 0.68840400  | -0.08807400 |
| C | -1.37487800 | 1.57892700  | -0.19296800 |
| C | 0.05678900  | 1.58660900  | -0.05404300 |
| C | 1.11941100  | 0.70347300  | -0.04233000 |
| C | 1.08336000  | -0.70269200 | -0.35585700 |
| H | -0.62889500 | -0.81794800 | 1.36562600  |
| H | -1.51327400 | -2.41039000 | 1.10155500  |
| H | -0.68023700 | -0.64228100 | -1.53005000 |
| H | 0.04606300  | -2.32855000 | -1.27568400 |
| H | -3.36592700 | -1.23177700 | 0.02465400  |
| H | -3.39064800 | 1.11792300  | -0.35198900 |
| H | -1.72588600 | 2.58896300  | -0.40498900 |
| H | 0.39852700  | 2.61708200  | 0.04927600  |
| C | 2.47388000  | 1.26921000  | 0.33942100  |
| N | 2.09745400  | -1.52201400 | 0.16836100  |
| H | 2.28523900  | -2.35437200 | -0.37655600 |
| H | 2.95562200  | -1.05688400 | 0.42875100  |
| H | 2.78744900  | 0.92448400  | 1.33425100  |
| H | 3.25460100  | 0.98111000  | -0.37570000 |
| H | 2.44454200  | 2.36022100  | 0.37710000  |

2- NH<sub>2</sub>-3-NH<sub>2</sub>-substituted

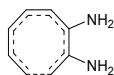

|   |             |             |             |
|---|-------------|-------------|-------------|
| C | -1.38943900 | -1.40303000 | 0.80210800  |
| C | 0.07111600  | -1.27042400 | -1.01569600 |
| C | -2.43497900 | -0.71761600 | 0.24704900  |
| C | -2.41770900 | 0.66565700  | -0.06516500 |
| C | -1.38092400 | 1.57763900  | -0.13728500 |
| C | 0.04917800  | 1.60366400  | -0.04772800 |
| C | 1.11574000  | 0.72185700  | -0.04751200 |
| C | 1.10824100  | -0.68674500 | -0.34026800 |
| H | -0.61527800 | -0.88077100 | 1.35010100  |
| H | -1.47054900 | -2.46924500 | 0.99736500  |
| H | -0.61396100 | -0.64888000 | -1.57659400 |
| H | 0.09430800  | -2.33126900 | -1.24850300 |
| H | -3.32531800 | -1.27106200 | -0.04816500 |
| H | -3.39011200 | 1.09168500  | -0.30860200 |
| H | -1.75046300 | 2.58862300  | -0.30838100 |
| H | 0.39629500  | 2.63616700  | 0.02322200  |
| N | 2.11870300  | -1.46427300 | 0.23079000  |



|   |            |             |             |
|---|------------|-------------|-------------|
| H | 2.46666300 | -2.23664300 | -0.31979200 |
| H | 2.83475900 | -0.95046800 | 0.72614800  |
| N | 2.39220800 | 1.21407000  | 0.35127100  |
| H | 2.36528700 | 2.18823100  | 0.63078800  |
| H | 3.10464600 | 1.08904100  | -0.36503200 |

2- NH<sub>2</sub>-3-OH-substituted

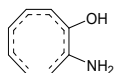

|   |             |             |             |
|---|-------------|-------------|-------------|
| C | -1.34704300 | -1.41115500 | 0.85208800  |
| C | 0.11456300  | -1.29128800 | -0.97013100 |
| C | -2.40826200 | -0.77288300 | 0.26921900  |
| C | -2.42705800 | 0.59499400  | -0.10524700 |
| C | -1.41869900 | 1.53736400  | -0.19239900 |
| C | 0.00411700  | 1.59937300  | -0.05232000 |
| C | 1.08174500  | 0.73752800  | -0.03570300 |
| C | 1.15601400  | -0.65850300 | -0.34685500 |
| H | -0.58409100 | -0.85114100 | 1.37767000  |
| H | -1.40771200 | -2.46913500 | 1.09348600  |
| H | -0.61875900 | -0.70331800 | -1.50378500 |
| H | 0.18298600  | -2.34800100 | -1.21271900 |
| H | -3.28361200 | -1.36012600 | -0.00412600 |
| H | -3.40693400 | 0.97925200  | -0.38437900 |
| H | -1.81051800 | 2.53179400  | -0.40483400 |
| H | 0.33280400  | 2.63841000  | 0.03219000  |
| N | 2.24818900  | -1.36569600 | 0.16565400  |
| H | 2.54709200  | -2.14540100 | -0.40602300 |
| H | 3.02467500  | -0.77723600 | 0.44019900  |
| O | 2.31759800  | 1.24112100  | 0.32431800  |
| H | 2.21369900  | 2.12322200  | 0.70629400  |

2- NH<sub>2</sub>-3-F-substituted

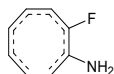

|   |             |             |             |
|---|-------------|-------------|-------------|
| C | 1.31708800  | -1.43009000 | -0.85277300 |
| C | -0.18788200 | -1.31405200 | 0.97198200  |
| C | 2.38104100  | -0.82525300 | -0.24462400 |
| C | 2.43779800  | 0.54535800  | 0.12406100  |
| C | 1.46260600  | 1.52063600  | 0.18193800  |
| C | 0.04302900  | 1.60520400  | 0.01466300  |
| C | -1.02852000 | 0.75432100  | 0.03278500  |
| C | -1.19043300 | -0.63058300 | 0.34006000  |
| H | 0.57184200  | -0.84623500 | -1.37852500 |
| H | 1.35135300  | -2.48834300 | -1.09700400 |
| H | 0.56692100  | -0.76410600 | 1.51570600  |
| H | -0.30128000 | -2.37069100 | 1.19672600  |
| H | 3.23370700  | -1.43747900 | 0.04435600  |
| H | 3.42642300  | 0.89866500  | 0.41328900  |
| H | 1.87544000  | 2.50859700  | 0.38150200  |
| H | -0.29695800 | 2.63056400  | -0.12669400 |
| N | -2.31414900 | -1.27417700 | -0.18728400 |
| H | -2.66972200 | -2.02972400 | 0.38441700  |
| H | -3.05282700 | -0.64847000 | -0.48217000 |

F -2.21269200 1.34591300 -0.32768400

2- NH<sub>2</sub>-3-CHO-substituted

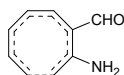

|   |             |             |             |
|---|-------------|-------------|-------------|
| C | 2.02679700  | 0.95979600  | 0.85561100  |
| C | 0.57427600  | 1.42451000  | -1.08404500 |
| C | 2.78553500  | 0.00380400  | 0.25593000  |
| C | 2.32460800  | -1.30385500 | -0.06305500 |
| C | 1.05430600  | -1.83463000 | -0.14266300 |
| C | -0.30160800 | -1.37192200 | -0.07178500 |
| C | -1.00977100 | -0.18699700 | -0.10853700 |
| C | -0.53270200 | 1.16505400  | -0.33769300 |
| H | 1.10351400  | 0.70446400  | 1.36180000  |
| H | 2.42824400  | 1.94903900  | 1.05819300  |
| H | 1.02307700  | 0.63571400  | -1.67363900 |
| H | 0.91121100  | 2.44378600  | -1.25304000 |
| H | 3.80345600  | 0.24825900  | -0.04232600 |
| H | 3.11292900  | -2.01973500 | -0.29375800 |
| H | 1.07202500  | -2.91198100 | -0.30105300 |
| H | -0.98877800 | -2.21597800 | -0.00867200 |
| C | -2.48830200 | -0.34278900 | -0.00735700 |
| N | -1.16823300 | 2.19773000  | 0.35828300  |
| H | -1.25364500 | 3.08435900  | -0.12119000 |
| H | -1.98610000 | 1.96440700  | 0.90296500  |
| H | -3.07816000 | 0.55403000  | -0.28463800 |
| O | -3.07112200 | -1.36228600 | 0.29611700  |

2-NH<sub>2</sub>-3-CN-substituted

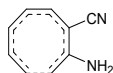

|   |             |             |             |
|---|-------------|-------------|-------------|
| C | 1.77958400  | 1.14297500  | 0.96079700  |
| C | 0.35560500  | 1.38982500  | -1.05352800 |
| C | 2.71726000  | 0.36385200  | 0.35699600  |
| C | 2.50278100  | -0.97754900 | -0.06773200 |
| C | 1.34950300  | -1.71674200 | -0.22053400 |
| C | -0.06607300 | -1.51067100 | -0.11548300 |
| C | -0.95931100 | -0.45496200 | -0.13300200 |
| C | -0.75482600 | 0.95674900  | -0.39646500 |
| H | 0.88531900  | 0.71232600  | 1.39455300  |
| H | 2.00164800  | 2.16976000  | 1.23780900  |
| H | 0.99249400  | 0.68020300  | -1.56284500 |
| H | 0.50480500  | 2.44591600  | -1.25849300 |
| H | 3.69144600  | 0.79357200  | 0.13139000  |
| H | 3.40935500  | -1.52601400 | -0.31945700 |
| H | 1.55624700  | -2.76229400 | -0.44395500 |
| H | -0.58176100 | -2.46675600 | -0.03386500 |
| C | -2.32748300 | -0.82017100 | 0.15130200  |
| N | -3.43578300 | -1.06509000 | 0.38817400  |
| N | -1.66405500 | 1.85612400  | 0.16235400  |
| H | -1.79591900 | 2.71020800  | -0.36416900 |
| H | -2.54700900 | 1.46599900  | 0.47123000  |

2-NH<sub>2</sub>-3-NO<sub>2</sub>-substituted

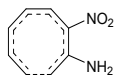

|   |             |             |             |
|---|-------------|-------------|-------------|
| C | 2.23418600  | 1.08721500  | 0.81819500  |
| C | 0.77395100  | 1.26478500  | -1.20705400 |
| C | 3.04029400  | 0.12781100  | 0.29561700  |
| C | 2.63747600  | -1.21632700 | 0.04823200  |
| C | 1.39410800  | -1.80043900 | -0.03549900 |
| C | 0.01358600  | -1.40182600 | -0.01975900 |
| C | -0.73252600 | -0.25317900 | -0.10697500 |
| C | -0.33617100 | 1.10849500  | -0.43432100 |
| H | 1.30402600  | 0.83733500  | 1.31439000  |
| H | 2.59056500  | 2.10456900  | 0.95531200  |
| H | 1.23587600  | 0.41379100  | -1.68907500 |
| H | 1.11636700  | 2.25674300  | -1.48709200 |
| H | 4.05482300  | 0.39190500  | 0.00320300  |
| H | 3.45706500  | -1.91437900 | -0.11709600 |
| H | 1.45692900  | -2.88247800 | -0.13502000 |
| H | -0.62902200 | -2.27443200 | 0.05548200  |
| N | -0.95251900 | 2.21168500  | 0.14269300  |
| H | -0.87925900 | 3.06189700  | -0.40076300 |
| H | -1.87390100 | 2.05662400  | 0.52789800  |
| N | -2.18365200 | -0.50334100 | 0.10497500  |
| O | -2.85269600 | 0.38441100  | 0.62199500  |
| O | -2.65101500 | -1.57306000 | -0.23593600 |

2-OH-3-CH<sub>3</sub>-substituted

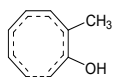

|   |             |             |             |
|---|-------------|-------------|-------------|
| C | -1.42795400 | -1.32275800 | 0.88158400  |
| C | 0.01421000  | -1.32110000 | -0.94240600 |
| C | -2.46496200 | -0.65318800 | 0.28611200  |
| C | -2.40899500 | 0.70021300  | -0.12259800 |
| C | -1.34894600 | 1.58747500  | -0.21823700 |
| C | 0.07432100  | 1.58755100  | -0.05707300 |
| C | 1.13019600  | 0.69081200  | -0.02874100 |
| C | 1.07507400  | -0.69932100 | -0.34455300 |
| H | -0.65024600 | -0.77253900 | 1.39631600  |
| H | -1.53491700 | -2.36917700 | 1.15563700  |
| H | -0.70569300 | -0.71997900 | -1.47939000 |
| H | 0.05814000  | -2.37932100 | -1.19015500 |
| H | -3.36832500 | -1.20430900 | 0.03032200  |
| H | -3.36532900 | 1.12909800  | -0.41893100 |
| H | -1.69294600 | 2.59675300  | -0.44469500 |
| H | 0.42878900  | 2.61394700  | 0.04246200  |
| C | 2.49567800  | 1.21052100  | 0.36834000  |
| O | 2.16272200  | -1.41066600 | 0.10280300  |
| H | 2.14577300  | -2.29916100 | -0.27920100 |
| H | 2.80629800  | 0.78620200  | 1.32958000  |
| H | 3.25941700  | 0.92377600  | -0.36151300 |
| H | 2.48553500  | 2.29881600  | 0.46257400  |

2-OH-3-NH<sub>2</sub>-substituted

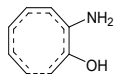

|   |             |             |             |
|---|-------------|-------------|-------------|
| C | -1.38862000 | -1.37555800 | 0.86636100  |
| C | 0.04990300  | -1.30419100 | -0.91736000 |
| C | -2.43414500 | -0.70333600 | 0.27971100  |
| C | -2.40481500 | 0.64995700  | -0.12060100 |
| C | -1.36190600 | 1.56671200  | -0.20976100 |
| C | 0.05207600  | 1.60714500  | -0.07573500 |
| C | 1.12779300  | 0.72175500  | -0.01821000 |
| C | 1.11359000  | -0.66389200 | -0.34504000 |
| H | -0.62274700 | -0.82845500 | 1.40111100  |
| H | -1.49969600 | -2.42266800 | 1.13688500  |
| H | -0.67515700 | -0.71635100 | -1.46278300 |
| H | 0.11248000  | -2.36166200 | -1.16234500 |
| H | -3.33275100 | -1.26340900 | 0.02426300  |
| H | -3.36821500 | 1.05941200  | -0.41969500 |
| H | -1.73514100 | 2.56684100  | -0.43109500 |
| H | 0.40750500  | 2.63768300  | -0.02902500 |
| O | 2.22770000  | -1.34800600 | 0.09647600  |
| H | 2.27415700  | -2.20722800 | -0.34417900 |
| N | 2.37960000  | 1.25418400  | 0.31763000  |
| H | 3.08140700  | 0.55621400  | 0.52768900  |
| H | 2.35609600  | 1.99283800  | 1.00777300  |

#### 2-OH-3-OH-substituted

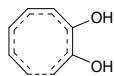

|   |             |             |             |
|---|-------------|-------------|-------------|
| C | 1.35638800  | -1.38539900 | -0.84734100 |
| C | -0.08726900 | -1.29956900 | 0.92052600  |
| C | 2.41124600  | -0.73137300 | -0.25862400 |
| C | 2.40081900  | 0.62882900  | 0.12296400  |
| C | 1.37034500  | 1.55563600  | 0.19678400  |
| C | -0.04695300 | 1.59854600  | 0.05148200  |
| C | -1.12201200 | 0.72271700  | 0.01391800  |
| C | -1.14738300 | -0.66479800 | 0.33076900  |
| H | 0.60989500  | -0.82656400 | -1.39746700 |
| H | 1.44334100  | -2.43808300 | -1.10424500 |
| H | 0.62953400  | -0.70892400 | 1.47393500  |
| H | -0.15291300 | -2.35550100 | 1.17088200  |
| H | 3.29496000  | -1.30595600 | 0.01443200  |
| H | 3.36817500  | 1.03024500  | 0.42015400  |
| H | 1.74644100  | 2.55588800  | 0.41025900  |
| H | -0.39059000 | 2.63351000  | -0.01776500 |
| O | -2.24876400 | -1.33111300 | -0.12664600 |
| H | -2.27797000 | -2.20890600 | 0.27857000  |
| O | -2.35380200 | 1.20299900  | -0.34146300 |
| H | -2.26143800 | 2.10168300  | -0.68675600 |

#### 2-OH-3-F-substituted

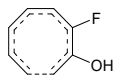

|   |            |             |             |
|---|------------|-------------|-------------|
| C | 1.32064200 | -1.40562400 | -0.84791200 |
|---|------------|-------------|-------------|

|   |             |             |             |
|---|-------------|-------------|-------------|
| C | -0.16307300 | -1.32714800 | 0.92142500  |
| C | 2.38133700  | -0.79053500 | -0.23359000 |
| C | 2.41326100  | 0.57327700  | 0.14250000  |
| C | 1.41948300  | 1.53696000  | 0.18639200  |
| C | 0.00498600  | 1.60653200  | 0.01259000  |
| C | -1.06568800 | 0.74472800  | 0.01167900  |
| C | -1.18145000 | -0.63575100 | 0.32392100  |
| H | 0.59393800  | -0.81861100 | -1.39594500 |
| H | 1.37588200  | -2.45908900 | -1.10914500 |
| H | 0.57599800  | -0.77769000 | 1.48725200  |
| H | -0.27674900 | -2.38380300 | 1.14973700  |
| H | 3.23993500  | -1.39422600 | 0.05541300  |
| H | 3.39095400  | 0.94051900  | 0.45020200  |
| H | 1.82006600  | 2.52983500  | 0.38660100  |
| H | -0.34676000 | 2.62960000  | -0.11497400 |
| O | -2.31534800 | -1.22679200 | -0.15246900 |
| H | -2.42237300 | -2.09458900 | 0.26150900  |
| F | -2.24501100 | 1.31419500  | -0.33921400 |

#### 2-OH-3-CHO-substituted

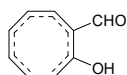

|   |             |             |             |
|---|-------------|-------------|-------------|
| C | 1.95954600  | 0.91946900  | 0.95528100  |
| C | 0.62796200  | 1.47246500  | -0.95157000 |
| C | 2.77073600  | 0.01570000  | 0.32838600  |
| C | 2.34001800  | -1.25574500 | -0.12388100 |
| C | 1.07299900  | -1.79649500 | -0.26337000 |
| C | -0.28223500 | -1.36177400 | -0.14655200 |
| C | -1.00850700 | -0.18274700 | -0.11834900 |
| C | -0.55347900 | 1.15746300  | -0.35147800 |
| H | 1.03340800  | 0.59479100  | 1.41461900  |
| H | 2.34369400  | 1.88481500  | 1.27328100  |
| H | 1.15257200  | 0.71221800  | -1.51298400 |
| H | 0.91361500  | 2.50811200  | -1.11938300 |
| H | 3.79863400  | 0.29428000  | 0.10404300  |
| H | 3.14152800  | -1.93584000 | -0.40936200 |
| H | 1.10825600  | -2.85937200 | -0.49925400 |
| H | -0.95944800 | -2.21469600 | -0.09356300 |
| C | -2.47727300 | -0.34635100 | 0.12083400  |
| O | -1.36260600 | 2.12483700  | 0.18980400  |
| H | -1.12579000 | 2.98939700  | -0.17489800 |
| H | -3.07472200 | 0.57774900  | 0.06750900  |
| O | -3.01618800 | -1.41025700 | 0.34197000  |

#### 2-OH-3-CN-substituted

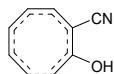

|   |             |             |             |
|---|-------------|-------------|-------------|
| C | 1.78434300  | 1.09603500  | 0.96110100  |
| C | 0.41171900  | 1.43100200  | -0.96174400 |
| C | 2.71574600  | 0.30375000  | 0.34999300  |
| C | 2.46932700  | -1.01802900 | -0.09511300 |
| C | 1.29267700  | -1.73190700 | -0.24025900 |
| C | -0.11165400 | -1.49722100 | -0.12634800 |

|   |             |             |             |
|---|-------------|-------------|-------------|
| C | -0.98342900 | -0.41720600 | -0.12176100 |
| C | -0.73031300 | 0.97078500  | -0.37884400 |
| H | 0.90657400  | 0.65731900  | 1.42009200  |
| H | 2.03405700  | 2.10752200  | 1.26929900  |
| H | 1.04398200  | 0.74190900  | -1.50345700 |
| H | 0.55105900  | 2.49227400  | -1.15002100 |
| H | 3.69779300  | 0.71874600  | 0.13149400  |
| H | 3.35894100  | -1.58188100 | -0.37131400 |
| H | 1.47664300  | -2.78020200 | -0.47064800 |
| H | -0.65220800 | -2.44019400 | -0.05922200 |
| C | -2.36034800 | -0.74769300 | 0.16738100  |
| N | -3.45496000 | -1.04813000 | 0.39666300  |
| O | -1.69390000 | 1.80058600  | 0.11407100  |
| H | -1.60932400 | 2.67963700  | -0.28185900 |

2-OH-3-NO<sub>2</sub>-substituted

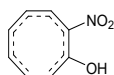

|   |             |             |             |
|---|-------------|-------------|-------------|
| C | 2.18815500  | 1.06420400  | 0.91243800  |
| C | 0.79524000  | 1.33590800  | -1.16339100 |
| C | 3.02107600  | 0.15451300  | 0.34360700  |
| C | 2.64830200  | -1.17783600 | 0.00584000  |
| C | 1.41574100  | -1.78078700 | -0.11960200 |
| C | 0.03289600  | -1.40381700 | -0.07653400 |
| C | -0.72133400 | -0.25579200 | -0.13302100 |
| C | -0.33752000 | 1.10885300  | -0.45476100 |
| H | 1.25513700  | 0.75854000  | 1.37035300  |
| H | 2.51796000  | 2.07785900  | 1.12101800  |
| H | 1.32701200  | 0.51936900  | -1.63115200 |
| H | 1.07039800  | 2.35571200  | -1.40923200 |
| H | 4.03431100  | 0.45550600  | 0.08489800  |
| H | 3.48313500  | -1.84726400 | -0.19667300 |
| H | 1.49761500  | -2.85509300 | -0.27374900 |
| H | -0.60153300 | -2.28342800 | -0.01163300 |
| O | -1.01364100 | 2.18525200  | 0.01082300  |
| H | -1.83874000 | 1.88696100  | 0.43597000  |
| N | -2.16350200 | -0.50163100 | 0.11951200  |
| O | -2.83542900 | 0.43517900  | 0.55501600  |
| O | -2.63294500 | -1.59895900 | -0.09256900 |

2-F-3-CH<sub>3</sub>-substituted

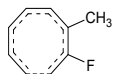

|   |             |             |             |
|---|-------------|-------------|-------------|
| C | -1.44102100 | -1.30632300 | 0.89134200  |
| C | -0.00754900 | -1.36197500 | -0.93358000 |
| C | -2.45795200 | -0.61676400 | 0.28245900  |
| C | -2.38066300 | 0.73373600  | -0.12935000 |
| C | -1.31100400 | 1.61222100  | -0.21733800 |
| C | 0.10853500  | 1.59285600  | -0.05357600 |
| C | 1.14136800  | 0.66704000  | -0.02537800 |
| C | 1.03596700  | -0.70487000 | -0.35856300 |
| H | -0.65659300 | -0.76900700 | 1.40892000  |
| H | -1.57273400 | -2.34837200 | 1.16967600  |

|   |             |             |             |
|---|-------------|-------------|-------------|
| H | -0.74076000 | -0.78690200 | -1.48005300 |
| H | 0.08304500  | -2.42157400 | -1.14795300 |
| H | -3.36893800 | -1.15293100 | 0.02162900  |
| H | -3.32991300 | 1.17211900  | -0.43394400 |
| H | -1.64383800 | 2.62570700  | -0.44113500 |
| H | 0.48546400  | 2.61094400  | 0.04652900  |
| F | 2.09157900  | -1.46619400 | 0.04673500  |
| C | 2.52441400  | 1.13599900  | 0.37459700  |
| H | 2.82177000  | 0.69289600  | 1.33127200  |
| H | 3.27782700  | 0.83869100  | -0.36145800 |
| H | 2.54789000  | 2.22265300  | 0.48222400  |

#### 2-F-3-NH<sub>2</sub>-substituted

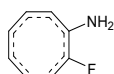

|   |             |             |             |
|---|-------------|-------------|-------------|
| C | 1.41186100  | -1.35115200 | -0.87899200 |
| C | -0.02020000 | -1.34106700 | 0.90987500  |
| C | 2.43325200  | -0.65494900 | -0.27667000 |
| C | 2.37219100  | 0.69303000  | 0.13627300  |
| C | 1.31357700  | 1.59356600  | 0.21857900  |
| C | -0.09708600 | 1.60950000  | 0.06711400  |
| C | -1.14473800 | 0.68913900  | 0.00191900  |
| C | -1.07217700 | -0.68011500 | 0.35456600  |
| H | 0.63508300  | -0.82029900 | -1.41401600 |
| H | 1.55413400  | -2.39210200 | -1.15697400 |
| H | 0.71636300  | -0.76839700 | 1.45491000  |
| H | -0.12426900 | -2.39610800 | 1.13938400  |
| H | 3.34312400  | -1.19523000 | -0.01824000 |
| H | 3.32442400  | 1.11652400  | 0.45067500  |
| H | 1.66813300  | 2.59871400  | 0.44731400  |
| H | -0.46828900 | 2.63327200  | -0.00276800 |
| F | -2.15798000 | -1.41407700 | -0.02285700 |
| N | -2.38589700 | 1.12131000  | -0.46912800 |
| H | -2.51233500 | 2.12435500  | -0.49775400 |
| H | -3.19334400 | 0.62907900  | -0.10890400 |

#### 2-F-3-OH-substituted

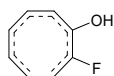

|   |             |             |             |
|---|-------------|-------------|-------------|
| C | -1.37923900 | -1.36745300 | 0.85726200  |
| C | 0.06199600  | -1.33885600 | -0.91863600 |
| C | -2.40855300 | -0.68456300 | 0.25587100  |
| C | -2.36883000 | 0.67417900  | -0.12800400 |
| C | -1.32402400 | 1.58655800  | -0.19538200 |
| C | 0.09110600  | 1.60492200  | -0.04801600 |
| C | 1.13886600  | 0.69515600  | -0.00982100 |
| C | 1.10699500  | -0.67944000 | -0.34614100 |
| H | -0.61938300 | -0.82848900 | 1.40831700  |
| H | -1.49868600 | -2.41611100 | 1.11585400  |
| H | -0.66360500 | -0.76734700 | -1.47973000 |
| H | 0.16393300  | -2.39642000 | -1.13683800 |
| H | -3.30399500 | -1.23813800 | -0.02274800 |
| H | -3.32724100 | 1.09055100  | -0.43299200 |

|   |             |             |             |
|---|-------------|-------------|-------------|
| H | -1.68430100 | 2.59256600  | -0.40858500 |
| H | 0.46150900  | 2.63033200  | 0.01956600  |
| F | 2.16943200  | -1.40102200 | 0.07265200  |
| O | 2.38804700  | 1.12294000  | 0.34580400  |
| H | 2.33261300  | 2.01572300  | 0.71406400  |

#### 2-F-3-F-substituted

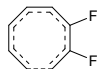

|   |             |             |             |
|---|-------------|-------------|-------------|
| C | 1.33747400  | -1.38852100 | -0.85382000 |
| C | -0.13890900 | -1.36852300 | 0.91744700  |
| C | 2.37696000  | -0.74567100 | -0.22990600 |
| C | 2.38238100  | 0.61785700  | 0.14565900  |
| C | 1.37476600  | 1.56910200  | 0.18262400  |
| C | -0.03797300 | 1.61494800  | 0.00929600  |
| C | -1.08263500 | 0.71998400  | 0.00908200  |
| C | -1.14161800 | -0.65187500 | 0.33963400  |
| H | 0.60017200  | -0.81928800 | -1.40597500 |
| H | 1.42295300  | -2.43936100 | -1.11621200 |
| H | 0.60639400  | -0.83970800 | 1.49385000  |
| H | -0.28934000 | -2.42458700 | 1.11388100  |
| H | 3.24686900  | -1.33050300 | 0.06429600  |
| H | 3.35240900  | 0.99963300  | 0.45938700  |
| H | 1.76121300  | 2.56807200  | 0.37970400  |
| H | -0.41474800 | 2.62917600  | -0.11592700 |
| F | -2.24017000 | -1.29939400 | -0.10127700 |
| F | -2.28300800 | 1.23858900  | -0.34240100 |

#### 2-F-3-CHO-substituted

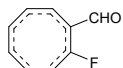

|   |             |             |             |
|---|-------------|-------------|-------------|
| C | 1.95207800  | 0.90553900  | 0.97730600  |
| C | 0.65678100  | 1.51227800  | -0.91659500 |
| C | 2.75710100  | 0.00491900  | 0.33388900  |
| C | 2.32485100  | -1.25689300 | -0.13766700 |
| C | 1.05681300  | -1.80047200 | -0.27892900 |
| C | -0.29394000 | -1.36627400 | -0.15694200 |
| C | -1.00518500 | -0.17549000 | -0.12047900 |
| C | -0.52602700 | 1.14134200  | -0.36706700 |
| H | 1.02774500  | 0.57577400  | 1.43613700  |
| H | 2.34382600  | 1.86150200  | 1.31281800  |
| H | 1.21888500  | 0.78374200  | -1.48258800 |
| H | 0.88132400  | 2.56503400  | -1.05034000 |
| H | 3.78586000  | 0.28320400  | 0.11300600  |
| H | 3.12602900  | -1.93092500 | -0.43760200 |
| H | 1.09361200  | -2.86156500 | -0.52220800 |
| H | -0.97908100 | -2.21295500 | -0.10752600 |
| F | -1.32153700 | 2.13862100  | 0.10753800  |
| C | -2.47408500 | -0.30691900 | 0.13728000  |
| H | -3.05375000 | 0.63030700  | 0.10787500  |
| O | -3.03011800 | -1.36123600 | 0.35472700  |

#### 2-F-3-CN-substituted



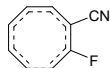

|   |             |             |             |
|---|-------------|-------------|-------------|
| C | 1.77579700  | 1.08895800  | 0.97344000  |
| C | 0.43078100  | 1.46549200  | -0.93807700 |
| C | 2.70061700  | 0.29351600  | 0.35201500  |
| C | 2.45192500  | -1.02338600 | -0.10022200 |
| C | 1.27489600  | -1.74124300 | -0.24362000 |
| C | -0.12559100 | -1.50633600 | -0.13172600 |
| C | -0.98504300 | -0.41332700 | -0.12328400 |
| C | -0.70225800 | 0.95506400  | -0.39502700 |
| H | 0.90171800  | 0.64901800  | 1.43782100  |
| H | 2.03462900  | 2.09512400  | 1.29046100  |
| H | 1.09144700  | 0.80816900  | -1.48422500 |
| H | 0.50987500  | 2.53512700  | -1.09897700 |
| H | 3.68338700  | 0.70666000  | 0.13300500  |
| H | 3.34097100  | -1.58421100 | -0.38387900 |
| H | 1.46112800  | -2.78937700 | -0.47259700 |
| H | -0.67461800 | -2.44446500 | -0.06922500 |
| C | -2.36687000 | -0.71007900 | 0.17341500  |
| N | -3.46780700 | -0.97340500 | 0.41603900  |
| F | -1.64437800 | 1.82064800  | 0.03709500  |

#### 2-F-3-NO<sub>2</sub>-substituted

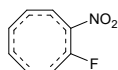

|   |             |             |             |
|---|-------------|-------------|-------------|
| C | 2.15968400  | 0.98592800  | 0.94145500  |
| C | 0.81460600  | 1.53188300  | -0.86462400 |
| C | 3.00687900  | 0.14121900  | 0.27264700  |
| C | 2.64791000  | -1.14605800 | -0.18612400 |
| C | 1.41465700  | -1.76571400 | -0.30873900 |
| C | 0.04000700  | -1.41357900 | -0.18000500 |
| C | -0.71268300 | -0.25966500 | -0.13157500 |
| C | -0.34591500 | 1.10104400  | -0.30868000 |
| H | 1.28606000  | 0.59028000  | 1.44584200  |
| H | 2.50008700  | 1.96330900  | 1.27133600  |
| H | 1.36400600  | 0.86362100  | -1.51296900 |
| H | 1.00905500  | 2.59703300  | -0.92871200 |
| H | 4.00698900  | 0.48965000  | 0.02250000  |
| H | 3.48310400  | -1.76947000 | -0.50127600 |
| H | 1.50815900  | -2.82009700 | -0.56210700 |
| H | -0.59543600 | -2.29569800 | -0.15324900 |
| F | -1.12374500 | 2.01186700  | 0.30767300  |
| N | -2.16477700 | -0.49059200 | 0.07397100  |
| O | -2.49973400 | -1.43389600 | 0.76994500  |
| O | -2.93098500 | 0.26619300  | -0.49174000 |

#### 2-CHO-3-CH<sub>3</sub>-substituted

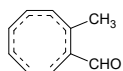

|   |             |             |             |
|---|-------------|-------------|-------------|
| C | 1.09881000  | -1.59889500 | -0.89205500 |
| C | -0.21225500 | -1.01921800 | 1.01517600  |
| C | 2.27457900  | -1.32759600 | -0.25953300 |
| C | 2.72837900  | -0.02429900 | 0.09703400  |

|   |             |             |             |
|---|-------------|-------------|-------------|
| C | 2.06401500  | 1.17944900  | 0.16807000  |
| C | 0.72417800  | 1.69084600  | 0.01904100  |
| C | -0.57565100 | 1.22535300  | 0.03461200  |
| C | -1.00344000 | -0.10936600 | 0.37052500  |
| H | 0.55876000  | -0.81127400 | -1.40215100 |
| H | 0.80825600  | -2.61977000 | -1.12256700 |
| H | 0.68606900  | -0.70131700 | 1.52796300  |
| H | -0.61502900 | -2.00186600 | 1.24404400  |
| H | 2.90425200  | -2.16045900 | 0.05069800  |
| H | 3.78054000  | 0.03266100  | 0.37089800  |
| H | 2.74903600  | 2.00427100  | 0.36548900  |
| H | 0.76645100  | 2.77184900  | -0.11306600 |
| C | -1.65564500 | 2.23713100  | -0.31573800 |
| C | -2.33666600 | -0.60008000 | -0.07842200 |
| H | -3.03439300 | 0.14775400  | -0.49565900 |
| O | -2.67975100 | -1.76265000 | -0.01781900 |
| H | -2.07915100 | 2.05009400  | -1.30959600 |
| H | -2.48172600 | 2.22105100  | 0.40257100  |
| H | -1.24288200 | 3.24825400  | -0.32834300 |

#### 2-CHO-3-NH<sub>2</sub>-substituted

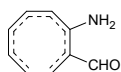

|   |             |             |             |
|---|-------------|-------------|-------------|
| C | 1.03948100  | -1.68731700 | -0.80850900 |
| C | -0.27525700 | -0.98157300 | 1.04686400  |
| C | 2.21966900  | -1.39262500 | -0.19345300 |
| C | 2.71407700  | -0.08186800 | 0.06547900  |
| C | 2.08792000  | 1.14657500  | 0.07501500  |
| C | 0.76738400  | 1.69918900  | -0.01105800 |
| C | -0.54459400 | 1.25682400  | 0.04101600  |
| C | -1.02107200 | -0.06533300 | 0.36104400  |
| H | 0.51348900  | -0.92767800 | -1.37262300 |
| H | 0.73631200  | -2.71694800 | -0.97491900 |
| H | 0.60928200  | -0.68083700 | 1.59447100  |
| H | -0.70649200 | -1.95576900 | 1.25898900  |
| H | 2.83293300  | -2.21661300 | 0.17061800  |
| H | 3.77366400  | -0.03773500 | 0.31064900  |
| H | 2.80735100  | 1.95589400  | 0.20005200  |
| H | 0.82093100  | 2.78365300  | -0.11491000 |
| C | -2.30801900 | -0.53292200 | -0.22407200 |
| H | -2.82095400 | 0.17032500  | -0.90331700 |
| O | -2.77118800 | -1.63683900 | -0.02067100 |
| N | -1.55948600 | 2.17633500  | -0.28374900 |
| H | -1.22720800 | 3.10712600  | -0.50436500 |
| H | -2.33093300 | 2.21325200  | 0.37301400  |

#### 2-CHO-3-OH-substituted

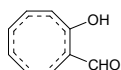

|   |             |             |             |
|---|-------------|-------------|-------------|
| C | 1.01623400  | -1.66435200 | -0.87362900 |
| C | -0.30445200 | -1.00650700 | 0.99796600  |
| C | 2.19530900  | -1.42571300 | -0.23200200 |
| C | 2.71095300  | -0.14168300 | 0.10904500  |
| C | 2.11344400  | 1.09921000  | 0.15189300  |
| C | 0.80602100  | 1.67006800  | 0.00608900  |

|   |             |             |             |
|---|-------------|-------------|-------------|
| C | -0.50551900 | 1.24067000  | 0.02956200  |
| C | -1.03916200 | -0.04883600 | 0.35825500  |
| H | 0.50728000  | -0.86886300 | -1.40272800 |
| H | 0.69922900  | -2.67856100 | -1.09822400 |
| H | 0.60227200  | -0.74792000 | 1.52861000  |
| H | -0.77025200 | -1.96497200 | 1.20872000  |
| H | 2.78740300  | -2.28025300 | 0.09377800  |
| H | 3.76202100  | -0.13477100 | 0.39117300  |
| H | 2.83950500  | 1.89072000  | 0.33657800  |
| H | 0.87273900  | 2.75416300  | -0.10888300 |
| C | -2.40101100 | -0.41868500 | -0.12189900 |
| H | -2.98742900 | 0.37796500  | -0.60686500 |
| O | -2.85491300 | -1.53815100 | -0.00597600 |
| O | -1.49068200 | 2.14756500  | -0.27535100 |
| H | -1.09889900 | 2.95215100  | -0.64322100 |

### 2-CHO-3-F-substituted

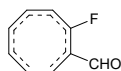

|   |             |             |             |
|---|-------------|-------------|-------------|
| C | 1.00983800  | -1.65637200 | -0.88173600 |
| C | -0.35138300 | -1.02983100 | 0.99408600  |
| C | 2.18259800  | -1.44018700 | -0.22246900 |
| C | 2.71614900  | -0.16498800 | 0.12951900  |
| C | 2.14296700  | 1.08568900  | 0.15744100  |
| C | 0.83846000  | 1.65653100  | -0.02035500 |
| C | -0.45434300 | 1.21229400  | 0.02655000  |
| C | -1.04830200 | -0.04210200 | 0.35768400  |
| H | 0.51502400  | -0.84812800 | -1.40564700 |
| H | 0.68321600  | -2.66416800 | -1.12061000 |
| H | 0.56045400  | -0.80624800 | 1.53108900  |
| H | -0.84878000 | -1.97526500 | 1.19148400  |
| H | 2.75820400  | -2.30518900 | 0.10437100  |
| H | 3.76339700  | -0.17841400 | 0.42574600  |
| H | 2.87313000  | 1.87194500  | 0.34524100  |
| H | 0.87100100  | 2.73220000  | -0.18597100 |
| C | -2.42726200 | -0.34153900 | -0.12530300 |
| H | -2.97424800 | 0.48505800  | -0.60783400 |
| O | -2.93599700 | -1.43565500 | -0.00997600 |
| F | -1.37397300 | 2.16627700  | -0.29895200 |

### 2-CHO-3-CHO-substituted

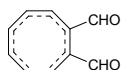

|   |             |             |             |
|---|-------------|-------------|-------------|
| C | 1.77125400  | -1.19347300 | -0.89514600 |
| C | 0.39524300  | -1.28000600 | 1.03192400  |
| C | 2.76820900  | -0.50068200 | -0.27278200 |
| C | 2.69816100  | 0.87822000  | 0.06467700  |
| C | 1.62087300  | 1.73596000  | 0.14798800  |
| C | 0.19131500  | 1.65509000  | 0.07549100  |
| C | -0.79715500 | 0.69005000  | 0.13333500  |
| C | -0.68115100 | -0.72025700 | 0.40474800  |
| H | 0.97803500  | -0.65922000 | -1.40382800 |
| H | 1.88078000  | -2.24797500 | -1.13135400 |
| H | 1.08698900  | -0.66397200 | 1.59261400  |

|   |             |             |             |
|---|-------------|-------------|-------------|
| H | 0.42075300  | -2.35493000 | 1.18737400  |
| H | 3.66902300  | -1.03325800 | 0.02773700  |
| H | 3.65440100  | 1.34000200  | 0.30571600  |
| H | 1.93125100  | 2.76794900  | 0.30714900  |
| H | -0.24746300 | 2.64882100  | -0.01249400 |
| C | -2.19036500 | 1.22960700  | -0.00160600 |
| C | -1.67100800 | -1.66571100 | -0.19469800 |
| H | -2.47360300 | -1.22524300 | -0.81583100 |
| O | -1.60078500 | -2.86925600 | -0.07513300 |
| H | -3.00425200 | 0.53202800  | 0.27411600  |
| O | -2.46523700 | 2.35963200  | -0.33671600 |

#### 2-CHO-3-CN-substituted

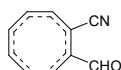

|   |             |             |             |
|---|-------------|-------------|-------------|
| C | 1.61552700  | -1.30617600 | -0.96618500 |
| C | 0.24071200  | -1.22785100 | 1.01678200  |
| C | 2.68987400  | -0.76801300 | -0.32479300 |
| C | 2.80222600  | 0.59494100  | 0.07383500  |
| C | 1.85582700  | 1.58856500  | 0.19343600  |
| C | 0.43038200  | 1.71669800  | 0.08567000  |
| C | -0.67244600 | 0.88085400  | 0.12710700  |
| C | -0.76177100 | -0.52723500 | 0.41469400  |
| H | 0.87768000  | -0.66563200 | -1.43404400 |
| H | 1.59244400  | -2.35730400 | -1.23840700 |
| H | 1.04344700  | -0.71745800 | 1.53169800  |
| H | 0.10400800  | -2.29067100 | 1.19602300  |
| H | 3.51892500  | -1.42003300 | -0.05507100 |
| H | 3.81121100  | 0.91193300  | 0.33189800  |
| H | 2.30256200  | 2.56164000  | 0.39297300  |
| H | 0.14680300  | 2.76240500  | -0.02232400 |
| C | -1.92535700 | 1.55565700  | -0.14584200 |
| N | -2.92481500 | 2.09985400  | -0.36199300 |
| C | -1.95604200 | -1.29615700 | -0.05239100 |
| H | -2.80998700 | -0.70593000 | -0.43039200 |
| O | -2.00337300 | -2.50570400 | -0.03403500 |

#### 2-CHO-3-NO<sub>2</sub>-substituted

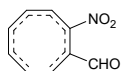

|   |             |             |             |
|---|-------------|-------------|-------------|
| C | -2.07423800 | 1.10908500  | -0.89029400 |
| C | -0.68546100 | 1.30999800  | 0.97283600  |
| C | -3.03040900 | 0.38152200  | -0.23871200 |
| C | -2.88912800 | -0.98283200 | 0.12312000  |
| C | -1.77046600 | -1.78757000 | 0.19983100  |
| C | -0.35048200 | -1.63847300 | 0.09969900  |
| C | 0.55961200  | -0.60752000 | 0.12962800  |
| C | 0.42279300  | 0.79664000  | 0.36027800  |
| H | -1.27760300 | 0.60062000  | -1.41970600 |
| H | -2.24111100 | 2.15116200  | -1.14713700 |
| H | -1.32498300 | 0.67830100  | 1.57582700  |
| H | -0.76118900 | 2.38697700  | 1.09413500  |
| H | -3.94885800 | 0.87806800  | 0.06944800  |
| H | -3.81550800 | -1.48487800 | 0.39685600  |

|   |             |             |             |
|---|-------------|-------------|-------------|
| H | -2.02327600 | -2.82964700 | 0.38714700  |
| H | 0.14260700  | -2.60404600 | 0.02156400  |
| C | 1.35429900  | 1.77988800  | -0.28871900 |
| H | 2.11549600  | 1.38138800  | -0.97869200 |
| O | 1.24435200  | 2.97214000  | -0.11776200 |
| N | 1.96943200  | -1.06324400 | -0.04313400 |
| O | 2.18703000  | -2.09093300 | -0.65853900 |
| O | 2.83477900  | -0.36616400 | 0.46336300  |

#### 2-CN-3-CH<sub>3</sub>-substituted

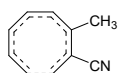

|   |             |             |             |
|---|-------------|-------------|-------------|
| C | 1.26352200  | -1.55656400 | -0.86999700 |
| C | -0.05720600 | -1.15430800 | 1.02987800  |
| C | 2.42767000  | -1.14111400 | -0.28737900 |
| C | 2.72006800  | 0.20243200  | 0.06931200  |
| C | 1.91197600  | 1.31924400  | 0.14895500  |
| C | 0.52297000  | 1.65862100  | 0.00988000  |
| C | -0.71170900 | 1.03745900  | 0.04871600  |
| C | -0.96806000 | -0.32254700 | 0.43099500  |
| H | 0.62047800  | -0.84253900 | -1.36910800 |
| H | 1.10593900  | -2.60394400 | -1.11138400 |
| H | 0.81252900  | -0.72491900 | 1.50839000  |
| H | -0.33651500 | -2.16550500 | 1.30750500  |
| H | 3.17233100  | -1.88803100 | -0.01578500 |
| H | 3.76050900  | 0.39070100  | 0.32814600  |
| H | 2.49369600  | 2.22304300  | 0.33051800  |
| C | -2.24808100 | -0.88791900 | 0.07276400  |
| H | 0.42458600  | 2.73337300  | -0.14120100 |
| N | -3.27283200 | -1.34460700 | -0.21713300 |
| C | -1.92794300 | 1.86005500  | -0.32541100 |
| H | -2.39729900 | 1.46339300  | -1.23312200 |
| H | -2.68769100 | 1.83340800  | 0.46279300  |
| H | -1.65798300 | 2.90111400  | -0.51308900 |

#### 2-CN-3-NH<sub>2</sub>-substituted

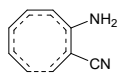

|   |             |             |             |
|---|-------------|-------------|-------------|
| C | 1.26716500  | -1.61194300 | -0.86341000 |
| C | -0.08962400 | -1.12129800 | 1.05739900  |
| C | 2.41266200  | -1.16521400 | -0.27188100 |
| C | 2.70294600  | 0.18616600  | 0.06555800  |
| C | 1.90147900  | 1.31106400  | 0.12255800  |
| C | 0.52369700  | 1.66962600  | 0.00542000  |
| C | -0.72067300 | 1.05295100  | 0.03827300  |
| C | -0.99493300 | -0.30576800 | 0.43837800  |
| H | 0.59834000  | -0.92098200 | -1.36084000 |
| H | 1.13540500  | -2.66593600 | -1.09082600 |
| H | 0.79141400  | -0.69114500 | 1.51443600  |
| H | -0.36543700 | -2.13134800 | 1.34029000  |
| H | 3.16544000  | -1.89968700 | 0.01331500  |
| H | 3.74319800  | 0.37573900  | 0.32232600  |
| H | 2.49416100  | 2.21090600  | 0.28868800  |
| C | -2.27225300 | -0.85638300 | 0.06382900  |

|   |             |             |             |
|---|-------------|-------------|-------------|
| H | 0.41640500  | 2.74882900  | -0.10749600 |
| N | -3.31133400 | -1.26369700 | -0.24972100 |
| N | -1.82667200 | 1.84402400  | -0.25748600 |
| H | -1.68035600 | 2.58237700  | -0.93183400 |
| H | -2.71532700 | 1.37375800  | -0.37435800 |

2-CN-3-OH-substituted

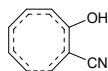

|   |             |             |             |
|---|-------------|-------------|-------------|
| C | 1.18160200  | -1.62541800 | -0.83819500 |
| C | -0.14222100 | -1.12010700 | 1.04015800  |
| C | 2.35159500  | -1.22610600 | -0.25606000 |
| C | 2.69778600  | 0.11496900  | 0.06324100  |
| C | 1.93992600  | 1.26862100  | 0.11103800  |
| C | 0.56923600  | 1.65980200  | -0.01030600 |
| C | -0.67841500 | 1.06713300  | 0.04242700  |
| C | -1.02341100 | -0.26694200 | 0.43077800  |
| H | 0.55852500  | -0.91177300 | -1.36220600 |
| H | 1.00099500  | -2.67454800 | -1.05399700 |
| H | 0.73920200  | -0.71738100 | 1.52088500  |
| H | -0.45692900 | -2.11962300 | 1.31998000  |
| H | 3.06877600  | -1.98988800 | 0.04225500  |
| H | 3.74472500  | 0.26704900  | 0.31796000  |
| H | 2.55911800  | 2.15150200  | 0.26838500  |
| C | -2.31932100 | -0.76544500 | 0.04469300  |
| H | 0.48846600  | 2.74036600  | -0.14365900 |
| N | -3.34383900 | -1.21263500 | -0.25728100 |
| O | -1.77988100 | 1.80766700  | -0.27354900 |
| H | -1.51761800 | 2.64236700  | -0.68688600 |

2-CN-3-F-substituted

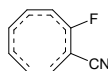

|   |             |             |             |
|---|-------------|-------------|-------------|
| C | 1.17066200  | -1.61655900 | -0.84369700 |
| C | -0.18078900 | -1.14631800 | 1.04030400  |
| C | 2.33803200  | -1.23551300 | -0.24598900 |
| C | 2.69949700  | 0.10158800  | 0.07913200  |
| C | 1.95962200  | 1.26499500  | 0.11064200  |
| C | 0.58918600  | 1.65101900  | -0.04114100 |
| C | -0.63668800 | 1.04513500  | 0.04148000  |
| C | -1.03663200 | -0.26630300 | 0.43220200  |
| H | 0.55827900  | -0.89055600 | -1.36405000 |
| H | 0.98049900  | -2.66172100 | -1.06983100 |
| H | 0.70646300  | -0.76763300 | 1.52929500  |
| H | -0.51991700 | -2.14135200 | 1.30725400  |
| H | 3.04266400  | -2.00909200 | 0.05590300  |
| H | 3.74587400  | 0.23754900  | 0.34564000  |
| H | 2.58076300  | 2.14596300  | 0.26752000  |
| C | -2.34929800 | -0.71031800 | 0.03861200  |
| H | 0.47265300  | 2.71756700  | -0.22707600 |
| N | -3.39397400 | -1.10222500 | -0.26957800 |
| F | -1.68122300 | 1.83983300  | -0.29187600 |

## 2-CN-3-CHO-substituted

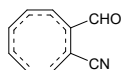

|   |             |             |             |
|---|-------------|-------------|-------------|
| C | -1.74461000 | -1.32771000 | 0.94243500  |
| C | -0.40698000 | -1.39391800 | -1.02883000 |
| C | -2.78469500 | -0.67634300 | 0.34415200  |
| C | -2.75863400 | 0.68525200  | -0.05885200 |
| C | -1.70911200 | 1.57310700  | -0.19372900 |
| C | -0.28143200 | 1.54267700  | -0.10714000 |
| C | 0.74497300  | 0.61750800  | -0.15078300 |
| C | 0.67849500  | -0.78387900 | -0.46168700 |
| H | -0.93755400 | -0.76641900 | 1.39799900  |
| H | -1.83001600 | -2.37310600 | 1.22493300  |
| H | -1.15793800 | -0.79040800 | -1.52070200 |
| H | -0.39280600 | -2.45757900 | -1.24313400 |
| H | -3.68918400 | -1.23548800 | 0.11132500  |
| H | -3.73182000 | 1.10907200  | -0.30115800 |
| H | -2.05420300 | 2.58887700  | -0.38315400 |
| C | 1.76828700  | -1.64259400 | -0.05294300 |
| H | 0.12576300  | 2.54865500  | -0.00166100 |
| N | 2.61752600  | -2.35778200 | 0.27726200  |
| C | 2.11224500  | 1.17985200  | 0.11059300  |
| H | 2.94226400  | 0.45051000  | 0.08813800  |
| O | 2.33644900  | 2.34833100  | 0.32841100  |

## 2-CN-3-CN-substituted

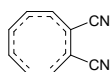

|   |             |             |             |
|---|-------------|-------------|-------------|
| C | 1.65206500  | -1.36722700 | -0.93093800 |
| C | 0.32961000  | -1.29723700 | 1.03679800  |
| C | 2.73372500  | -0.77516400 | -0.34369800 |
| C | 2.80164000  | 0.59186400  | 0.03438200  |
| C | 1.81834300  | 1.55332500  | 0.15817600  |
| C | 0.39138700  | 1.63067400  | 0.07569500  |
| C | -0.68981400 | 0.76527100  | 0.13879300  |
| C | -0.72256600 | -0.63394200 | 0.46776300  |
| H | 0.88518100  | -0.76466100 | -1.40286500 |
| H | 1.66919000  | -2.42109200 | -1.19349200 |
| H | 1.11590000  | -0.73259800 | 1.51915200  |
| H | 0.24802600  | -2.35331200 | 1.27130800  |
| H | 3.59813600  | -1.38952000 | -0.09839200 |
| H | 3.80167400  | 0.95179900  | 0.26947600  |
| H | 2.23436700  | 2.54447700  | 0.33253100  |
| C | -1.87987200 | -1.40364200 | 0.08104800  |
| H | 0.06934100  | 2.66424500  | -0.03854600 |
| C | -1.96900600 | 1.37927000  | -0.13983800 |
| N | -2.98562400 | 1.88635600  | -0.36221800 |
| N | -2.78793200 | -2.05185500 | -0.22753400 |

2-CN-3-NO<sub>2</sub>-substituted

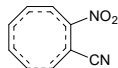

|   |             |             |             |
|---|-------------|-------------|-------------|
| C | 2.03944900  | 1.26023800  | 0.86449500  |
| C | 0.72029300  | 1.35509200  | -1.03911200 |
| C | 3.03719100  | 0.52928400  | 0.27965000  |
| C | 2.92898400  | -0.84281800 | -0.05956300 |
| C | 1.82556400  | -1.66762400 | -0.15602400 |
| C | 0.40193000  | -1.54471900 | -0.08718300 |
| C | -0.53820700 | -0.54404300 | -0.16232900 |
| C | -0.41394800 | 0.84922500  | -0.46063400 |
| H | 1.22768400  | 0.75864800  | 1.37776000  |
| H | 2.18622200  | 2.30951500  | 1.10427200  |
| H | 1.38185500  | 0.69025800  | -1.57952100 |
| H | 0.80249600  | 2.41895900  | -1.23444800 |
| H | 3.96468800  | 1.02984600  | 0.00763600  |
| H | 3.87156100  | -1.33613800 | -0.28988400 |
| H | 2.10147000  | -2.70897400 | -0.31190500 |
| C | -1.36584300 | 1.80383500  | 0.05573500  |
| H | -0.07152400 | -2.51691900 | 0.02339300  |
| N | -2.03784700 | 2.63892300  | 0.49233100  |
| N | -1.93614300 | -1.02050500 | 0.04241200  |
| O | -2.81835500 | -0.36211000 | -0.47621900 |
| O | -2.11402000 | -2.03350800 | 0.69488000  |

2-NO<sub>2</sub>-3-CH<sub>3</sub>-substituted

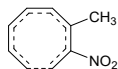

|   |             |             |             |
|---|-------------|-------------|-------------|
| C | -1.42777800 | -1.57239000 | 0.83057600  |
| C | -0.11177100 | -0.99099400 | -1.06479700 |
| C | -2.59695400 | -1.22940700 | 0.22055200  |
| C | -2.98041700 | 0.10141300  | -0.11303200 |
| C | -2.25563900 | 1.27250400  | -0.15249900 |
| C | -0.89847100 | 1.71545000  | 0.03591800  |
| C | 0.38999300  | 1.21292900  | 0.00020300  |
| C | 0.71279800  | -0.11589600 | -0.43101000 |
| H | -0.83854900 | -0.82581700 | 1.34879800  |
| H | -1.18410100 | -2.61023100 | 1.03801200  |
| H | -0.99530600 | -0.60696800 | -1.55576900 |
| H | 0.23500200  | -1.98439500 | -1.32561600 |
| H | -3.27653000 | -2.02109600 | -0.09165300 |
| H | -4.02683200 | 0.21948000  | -0.38884800 |
| H | -2.89719100 | 2.13542700  | -0.33126900 |
| H | -0.89730500 | 2.78702000  | 0.23104900  |
| N | 2.02468200  | -0.68871000 | -0.05672700 |
| O | 3.02449700  | -0.01899100 | -0.24275700 |
| O | 2.02433400  | -1.82260500 | 0.39586700  |
| C | 1.49673600  | 2.15318400  | 0.43715000  |
| H | 1.06697600  | 3.10056500  | 0.76791400  |
| H | 2.07077200  | 1.73506300  | 1.27023900  |
| H | 2.20865100  | 2.34393700  | -0.36901000 |

2-NO<sub>2</sub>-3-NH<sub>2</sub>-substituted



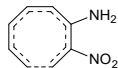

|   |             |             |             |
|---|-------------|-------------|-------------|
| C | 1.36442300  | -1.66495200 | -0.83758100 |
| C | 0.07611900  | -0.89632700 | 1.13794600  |
| C | 2.52260700  | -1.29642800 | -0.23300300 |
| C | 2.94962500  | 0.04457700  | 0.02817900  |
| C | 2.26346600  | 1.23714900  | 0.05637300  |
| C | 0.92089500  | 1.73699900  | -0.02961700 |
| C | -0.38830300 | 1.28097300  | 0.04673400  |
| C | -0.74856900 | -0.06572200 | 0.46013200  |
| H | 0.74906000  | -0.93687900 | -1.35296600 |
| H | 1.12094600  | -2.71104700 | -0.99759700 |
| H | 0.97095400  | -0.49017000 | 1.59157400  |
| H | -0.23804000 | -1.89846000 | 1.40027200  |
| H | 3.19639500  | -2.08240500 | 0.10786100  |
| H | 4.01134600  | 0.14326400  | 0.24505500  |
| H | 2.94507300  | 2.07939600  | 0.17548000  |
| H | 0.93403300  | 2.82058300  | -0.14842300 |
| N | -2.01438900 | -0.67615700 | 0.01302400  |
| O | -2.97139000 | 0.04596300  | -0.24264800 |
| O | -2.04997800 | -1.89002600 | -0.07688600 |
| N | -1.38631100 | 2.20791100  | -0.18165500 |
| H | -1.14516000 | 2.98464000  | -0.78026200 |
| H | -2.33035000 | 1.86370200  | -0.27928300 |

2-NO<sub>2</sub>-3-OH-substituted

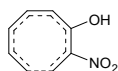

|   |             |             |             |
|---|-------------|-------------|-------------|
| C | 1.37071400  | -1.64431500 | -0.76142800 |
| C | 0.04604300  | -0.98118800 | 1.08665100  |
| C | 2.54527000  | -1.29011900 | -0.16437500 |
| C | 2.96338700  | 0.04038900  | 0.12127500  |
| C | 2.27899300  | 1.23832900  | 0.11355900  |
| C | 0.93916800  | 1.70754300  | -0.06886600 |
| C | -0.34709400 | 1.20343700  | -0.02110700 |
| C | -0.74558000 | -0.08529000 | 0.44308400  |
| H | 0.78529800  | -0.91945200 | -1.31296700 |
| H | 1.12713700  | -2.68802300 | -0.93753400 |
| H | 0.93695800  | -0.62615200 | 1.58680900  |
| H | -0.34320100 | -1.95659300 | 1.35770600  |
| H | 3.21244200  | -2.08194800 | 0.17401900  |
| H | 4.01173000  | 0.13697300  | 0.39678900  |
| H | 2.94703300  | 2.08682100  | 0.25908700  |
| H | 0.93040800  | 2.78177100  | -0.26368900 |
| N | -2.08021600 | -0.57414300 | 0.04301800  |
| O | -3.05228800 | 0.05151700  | 0.40721100  |
| O | -2.10467300 | -1.60953000 | -0.60639500 |
| O | -1.38232100 | 1.98361800  | -0.44196700 |
| H | -1.03744400 | 2.74804000  | -0.92489700 |

2-NO<sub>2</sub>-3-F-substituted

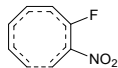

|   |             |             |             |
|---|-------------|-------------|-------------|
| C | 1.18819600  | -1.64499900 | -0.84777300 |
| C | -0.00987500 | -1.07754100 | 1.03257400  |
| C | 2.41648000  | -1.40072700 | -0.29326400 |
| C | 2.94481300  | -0.12023300 | 0.01199800  |
| C | 2.34779100  | 1.12271000  | 0.09433500  |
| C | 1.02954300  | 1.67276800  | 0.05594800  |
| C | -0.25777000 | 1.20644000  | 0.14335400  |
| C | -0.75227700 | -0.08192500 | 0.47135000  |
| H | 0.66320000  | -0.86124300 | -1.38173900 |
| H | 0.87846500  | -2.66364300 | -1.06382700 |
| H | 0.89097700  | -0.81580600 | 1.57107900  |
| H | -0.47284500 | -2.03642900 | 1.23726400  |
| H | 3.03342700  | -2.25313900 | -0.01252800 |
| H | 4.01143700  | -0.10961900 | 0.22775600  |
| H | 3.07850800  | 1.91869600  | 0.22836600  |
| H | 1.03148800  | 2.75834700  | -0.02490400 |
| N | -2.07831300 | -0.46498400 | -0.05241800 |
| O | -2.45184200 | 0.06770600  | -1.08056300 |
| O | -2.68938100 | -1.32890700 | 0.55339400  |
| F | -1.20867600 | 2.14981900  | -0.02314700 |

#### 2-NO<sub>2</sub>-3-CHO-substituted

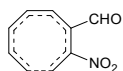

|   |             |             |             |
|---|-------------|-------------|-------------|
| C | -1.65662900 | -1.45044000 | 0.90623200  |
| C | -0.43378700 | -1.29654500 | -1.02941200 |
| C | -2.81271200 | -0.95766100 | 0.36011400  |
| C | -3.01915000 | 0.39799900  | 0.00829800  |
| C | -2.12935700 | 1.44739600  | -0.13842000 |
| C | -0.71391800 | 1.64721200  | -0.13842300 |
| C | 0.44156200  | 0.88957000  | -0.21529100 |
| C | 0.53949400  | -0.50357100 | -0.49943200 |
| H | -0.96084900 | -0.77643300 | 1.39344800  |
| H | -1.56996600 | -2.50277700 | 1.16204700  |
| H | -1.24570800 | -0.82356200 | -1.56553900 |
| H | -0.24371100 | -2.34995300 | -1.20070800 |
| H | -3.61915500 | -1.65151400 | 0.12882800  |
| H | -4.05535600 | 0.66604000  | -0.19082600 |
| H | -2.64182200 | 2.39660100  | -0.28799700 |
| H | -0.46960500 | 2.70787400  | -0.09187100 |
| N | 1.71440300  | -1.22549700 | 0.04574900  |
| O | 2.32307500  | -0.69255100 | 0.96045600  |
| O | 1.98298200  | -2.31848700 | -0.42014300 |
| C | 1.71955500  | 1.68577100  | -0.14412800 |
| H | 2.62968000  | 1.18352600  | -0.51191800 |
| O | 1.76460800  | 2.83232500  | 0.23307000  |

#### 2-NO<sub>2</sub>-3-CN-substituted

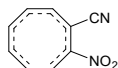

|   |             |             |             |
|---|-------------|-------------|-------------|
| C | 1.66290100  | -1.41378900 | -0.89077300 |
| C | 0.42291900  | -1.17885800 | 1.03488300  |
| C | 2.81851800  | -0.92720100 | -0.33870400 |
| C | 3.04130500  | 0.43075200  | -0.00649700 |
| C | 2.16733400  | 1.49604300  | 0.11769000  |
| C | 0.75767000  | 1.72888500  | 0.09366600  |
| C | -0.41239700 | 0.98265300  | 0.15696700  |
| C | -0.54272400 | -0.40250100 | 0.47116200  |
| H | 0.98148400  | -0.74276700 | -1.40148700 |
| H | 1.56268300  | -2.47039400 | -1.12283500 |
| H | 1.23833400  | -0.69507300 | 1.55532500  |
| H | 0.21736800  | -2.22173100 | 1.24729400  |
| H | 3.61156600  | -1.62813800 | -0.08402600 |
| H | 4.07855900  | 0.68682300  | 0.20141500  |
| H | 2.69308500  | 2.43818300  | 0.26344600  |
| H | 0.54638700  | 2.79477700  | 0.03543400  |
| C | -1.61780700 | 1.76811500  | 0.00271200  |
| N | -2.53755500 | 2.46581000  | -0.07719000 |
| N | -1.73599600 | -1.12240500 | -0.03242800 |
| O | -2.32879200 | -0.62865500 | -0.97305600 |
| O | -2.02132400 | -2.18010900 | 0.50132100  |

#### 2-NO<sub>2</sub>-3-NO<sub>2</sub>-substituted

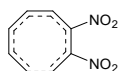

|   |             |             |             |
|---|-------------|-------------|-------------|
| C | 2.00552400  | 1.32479800  | 0.80037100  |
| C | 0.75051700  | 1.28452700  | -1.03093200 |
| C | 3.09137400  | 0.67486400  | 0.25948500  |
| C | 3.13270400  | -0.70381900 | -0.03558600 |
| C | 2.12432100  | -1.65121800 | -0.12109200 |
| C | 0.70033400  | -1.67991700 | -0.10422000 |
| C | -0.32612500 | -0.76509700 | -0.18780800 |
| C | -0.30627200 | 0.61816800  | -0.48019300 |
| H | 1.26833600  | 0.76179300  | 1.36266500  |
| H | 2.05921800  | 2.38763000  | 1.01982200  |
| H | 1.46066100  | 0.72382400  | -1.62433000 |
| H | 0.67033600  | 2.35284000  | -1.20155300 |
| H | 3.96596100  | 1.26114800  | -0.01617800 |
| H | 4.12496900  | -1.09889000 | -0.24599400 |
| H | 2.51821400  | -2.65845100 | -0.24174900 |
| H | 0.31860000  | -2.69565600 | -0.03840900 |
| N | -1.33552300 | 1.47508100  | 0.15697600  |
| O | -1.60211300 | 2.52940600  | -0.38591100 |
| O | -1.78550000 | 1.09045800  | 1.22098800  |
| N | -1.68705800 | -1.36189700 | -0.07614900 |
| O | -1.81775000 | -2.38020900 | 0.57461500  |
| O | -2.57744900 | -0.79469700 | -0.68221800 |

#### 5.3.10 2,4-substituted

##### 2-CH<sub>3</sub>-4-CH<sub>3</sub>-substituted

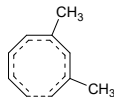

|   |             |             |             |
|---|-------------|-------------|-------------|
| C | 0.67745400  | 1.84386700  | -0.81987500 |
| C | 1.41269500  | 0.61297300  | 0.95737000  |
| C | -0.44437600 | 2.35948300  | -0.21913300 |
| C | -1.57355900 | 1.59644500  | 0.15533900  |
| C | -1.79656900 | 0.22935500  | 0.20986300  |
| C | -1.07604400 | -0.99632800 | 0.00309200  |
| C | 0.27213100  | -1.32658200 | -0.01283600 |
| C | 1.44737800  | -0.59645600 | 0.30946300  |
| H | 0.60959300  | 0.91748100  | -1.37644200 |
| H | 1.51270200  | 2.49302000  | -1.06971100 |
| H | 0.52844400  | 0.90076600  | 1.51108400  |
| H | 2.33813800  | 1.11939100  | 1.22111100  |
| H | -0.44562100 | 3.40739300  | 0.07646900  |
| H | -2.43338700 | 2.18630700  | 0.47047900  |
| H | -2.84452600 | 0.01546000  | 0.42856400  |
| H | 0.47192300  | -2.34980500 | -0.33266000 |
| C | 2.75350400  | -1.13004100 | -0.23150000 |
| H | 3.61213200  | -0.65011800 | 0.24558300  |
| H | 2.83257400  | -2.21076400 | -0.07127700 |
| H | 2.82736800  | -0.95872800 | -1.31380800 |
| C | -2.03128500 | -2.16965300 | -0.19664100 |
| H | -2.72737100 | -1.98114100 | -1.02085000 |
| H | -1.49760900 | -3.09932500 | -0.40641200 |
| H | -2.63234300 | -2.32831300 | 0.70702500  |

2-CH<sub>3</sub>-4-NH<sub>2</sub>-substituted

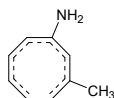

|   |             |             |             |
|---|-------------|-------------|-------------|
| C | 0.33744900  | 1.90299900  | -0.83093900 |
| C | 1.28563900  | 0.83244200  | 0.95982700  |
| C | -0.86147900 | 2.23048500  | -0.24632300 |
| C | -1.83365500 | 1.28901900  | 0.16132300  |
| C | -1.81875600 | -0.09126600 | 0.25533100  |
| C | -0.90082800 | -1.17192200 | 0.00600500  |
| C | 0.48743400  | -1.26537600 | -0.04132300 |
| C | 1.51566500  | -0.35920900 | 0.31603000  |
| H | 0.43420000  | 0.96685700  | -1.36733100 |
| H | 1.04678800  | 2.68340300  | -1.09467500 |
| H | 0.36694000  | 0.98014600  | 1.51260300  |
| H | 2.11904800  | 1.48076800  | 1.21789600  |
| H | -1.04654800 | 3.26734700  | 0.02793300  |
| H | -2.77169000 | 1.72643000  | 0.50095500  |
| H | -2.78657800 | -0.49475300 | 0.55360300  |
| H | 0.85106800  | -2.22508800 | -0.41213700 |
| C | 2.89565200  | -0.66815600 | -0.21868400 |
| H | 3.66057400  | -0.05804700 | 0.26858800  |
| H | 3.14932700  | -1.72250200 | -0.06373100 |
| H | 2.94740600  | -0.47873600 | -1.29926100 |
| N | -1.59875300 | -2.39620700 | -0.13094100 |
| H | -2.40742400 | -2.35479100 | -0.73973300 |
| H | -1.01457500 | -3.19167900 | -0.35560600 |

2-CH<sub>3</sub>-4-OH-substituted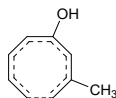

|   |             |             |             |
|---|-------------|-------------|-------------|
| C | -0.14254600 | -1.91375500 | -0.84267500 |
| C | -1.22279300 | -0.92621900 | 0.95901800  |
| C | 1.06549800  | -2.13380200 | -0.23171500 |
| C | 1.95051800  | -1.10962800 | 0.17790000  |
| C | 1.80800500  | 0.26398800  | 0.24920500  |
| C | 0.78261900  | 1.23737200  | 0.00137600  |
| C | -0.60043000 | 1.23624200  | -0.02358900 |
| C | -1.55059400 | 0.23823300  | 0.31247100  |
| H | -0.31949200 | -0.98381500 | -1.36892800 |
| H | -0.77805300 | -2.75155500 | -1.11659500 |
| H | -0.29601100 | -0.99763500 | 1.51346200  |
| H | -1.99489600 | -1.65092700 | 1.20479200  |
| H | 1.33610100  | -3.14981700 | 0.04869800  |
| H | 2.92142700  | -1.45843200 | 0.52632500  |
| H | 2.73584100  | 0.76017400  | 0.54035000  |
| H | -1.00802100 | 2.18437800  | -0.37062600 |
| C | -2.94884800 | 0.43936800  | -0.22455800 |
| H | -3.65350900 | -0.27049700 | 0.21608500  |
| H | -3.30464700 | 1.45337700  | -0.01219500 |
| H | -2.97181000 | 0.31170000  | -1.31460600 |
| O | 1.28587700  | 2.51298200  | -0.20164700 |
| H | 2.19747400  | 2.45841100  | -0.51817200 |

2-CH<sub>3</sub>-4-F-substituted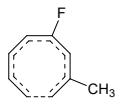

|   |             |             |             |
|---|-------------|-------------|-------------|
| C | 0.01483500  | -1.93305300 | -0.80986800 |
| C | -1.15159600 | -0.98728400 | 0.97047400  |
| C | 1.23163500  | -2.04482600 | -0.19085200 |
| C | 2.05719900  | -0.94719500 | 0.15242800  |
| C | 1.81065700  | 0.41164400  | 0.17797700  |
| C | 0.68484300  | 1.26646100  | -0.00329400 |
| C | -0.68910700 | 1.20447600  | -0.00954400 |
| C | -1.56923800 | 0.13465600  | 0.30479200  |
| H | -0.22742800 | -1.03536900 | -1.36569700 |
| H | -0.56423900 | -2.82024600 | -1.05041200 |
| H | -0.22580200 | -0.97375700 | 1.53141600  |
| H | -1.85999100 | -1.77372000 | 1.21810600  |
| H | 1.57261700  | -3.02858900 | 0.12597800  |
| H | 3.06811300  | -1.20947500 | 0.45941200  |
| H | 2.69611400  | 1.01714500  | 0.36305000  |
| H | -1.15187500 | 2.13910800  | -0.32242400 |
| C | -2.97004200 | 0.22265900  | -0.25224300 |
| H | -3.62858900 | -0.52291600 | 0.20047500  |
| H | -3.39900000 | 1.21436100  | -0.07243400 |
| H | -2.97002800 | 0.06405300  | -1.33841600 |
| F | 1.13055500  | 2.55157400  | -0.19869700 |

2-CH<sub>3</sub>-4-CHO-substituted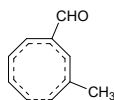

|   |             |             |             |
|---|-------------|-------------|-------------|
| C | 1.69357700  | 1.42628300  | -0.83277000 |
| C | 1.82610600  | -0.03117800 | 0.95142800  |
| C | 0.91227400  | 2.35928300  | -0.20250100 |
| C | -0.44657100 | 2.17408300  | 0.15478500  |
| C | -1.24176400 | 1.04539800  | 0.20053400  |
| C | -1.09009700 | -0.36828600 | 0.01499300  |
| C | -0.03549500 | -1.27351800 | -0.00274900 |
| C | 1.34225000  | -1.13820100 | 0.29933300  |
| H | 1.23196700  | 0.62431000  | -1.39473600 |
| H | 2.72907200  | 1.65031400  | -1.07461300 |
| H | 1.14867700  | 0.60772700  | 1.50293700  |
| H | 2.87940500  | 0.03456300  | 1.21363200  |
| H | 1.37239600  | 3.29442100  | 0.11351800  |
| H | -0.96354300 | 3.08366700  | 0.45679500  |
| H | -2.28806200 | 1.27753400  | 0.39558900  |
| H | -0.32477400 | -2.28063100 | -0.31115900 |
| C | 2.28208300  | -2.19332700 | -0.23458900 |
| H | 3.26225800  | -2.13748200 | 0.24578300  |
| H | 1.87681300  | -3.19720900 | -0.06885900 |
| H | 2.42774400  | -2.07820600 | -1.31651900 |
| C | -2.41182600 | -1.06312600 | -0.15934800 |
| H | -2.33616800 | -2.14631800 | -0.38634600 |
| O | -3.49987700 | -0.54464300 | -0.06384000 |

2-CH<sub>3</sub>-4-CN-substituted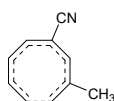

|   |             |             |             |
|---|-------------|-------------|-------------|
| C | -1.87585000 | 1.07365400  | 0.87845900  |
| C | -1.71732500 | -0.37626900 | -0.94736000 |
| C | -1.34575700 | 2.15708300  | 0.23165100  |
| C | 0.00916500  | 2.28661100  | -0.16405300 |
| C | 1.04150500  | 1.37321000  | -0.24108400 |
| C | 1.21193900  | -0.04713600 | -0.06340000 |
| C | 0.39663500  | -1.17363200 | -0.03052000 |
| C | -0.98520100 | -1.34065500 | -0.30522000 |
| H | -1.23112500 | 0.38748600  | 1.41308800  |
| H | -2.92834600 | 1.05541700  | 1.14783800  |
| H | -1.21605900 | 0.40843300  | -1.49880600 |
| H | -2.76448300 | -0.54754800 | -1.18405400 |
| H | -2.01324900 | 2.96464900  | -0.06414200 |
| H | 0.29799800  | 3.28924600  | -0.47410500 |
| H | 1.99484500  | 1.84756900  | -0.46686800 |
| H | 0.91669500  | -2.08506800 | 0.26218100  |
| C | -1.64927500 | -2.58186800 | 0.24198800  |
| H | -2.64598200 | -2.72166400 | -0.18367000 |
| H | -1.05394900 | -3.47315000 | 0.01719500  |
| H | -1.74898800 | -2.52571400 | 1.33331300  |

|   |            |             |            |
|---|------------|-------------|------------|
| C | 2.61756400 | -0.38419900 | 0.09305000 |
| N | 3.73889200 | -0.64577900 | 0.21956600 |

2-CH<sub>3</sub>-4-NO<sub>2</sub>-substituted

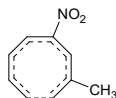

|   |             |             |             |
|---|-------------|-------------|-------------|
| C | 2.25641100  | -0.99905800 | 0.87715800  |
| C | 2.02807200  | 0.46130900  | -0.93241200 |
| C | 1.79660600  | -2.09566800 | 0.19973700  |
| C | 0.45764000  | -2.29776300 | -0.21990400 |
| C | -0.63179800 | -1.45341300 | -0.29016200 |
| C | -0.87472100 | -0.05930000 | -0.09778100 |
| C | -0.15043100 | 1.11386800  | -0.04384500 |
| C | 1.22487000  | 1.36397100  | -0.28528700 |
| H | 1.56916500  | -0.36067500 | 1.41783700  |
| H | 3.30314400  | -0.92776100 | 1.15999500  |
| H | 1.58866100  | -0.34217800 | -1.50921400 |
| H | 3.06568900  | 0.70441800  | -1.14720800 |
| H | 2.51485200  | -2.85499800 | -0.10527400 |
| H | 0.24031500  | -3.30647600 | -0.56588600 |
| H | -1.54923600 | -1.97675600 | -0.53829500 |
| H | -0.73598300 | 1.98102800  | 0.24729200  |
| C | 1.80282400  | 2.62802600  | 0.30548600  |
| H | 2.79952200  | 2.83430500  | -0.09229300 |
| H | 1.16114400  | 3.48780700  | 0.08592100  |
| H | 1.88043800  | 2.55241000  | 1.39741900  |
| N | -2.36025800 | 0.20285100  | 0.06478300  |
| O | -2.76835500 | 1.34137300  | -0.08489700 |
| O | -3.07823700 | -0.73923800 | 0.34968100  |

2- NH<sub>2</sub>-4-CH<sub>3</sub>-substituted

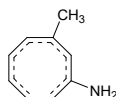

|   |             |             |             |
|---|-------------|-------------|-------------|
| C | 0.82274900  | 1.80020600  | -0.83804400 |
| C | 1.50590600  | 0.46699400  | 0.97265700  |
| C | -0.24839300 | 2.39112400  | -0.22698100 |
| C | -1.43050300 | 1.70954300  | 0.16119200  |
| C | -1.75608100 | 0.36892300  | 0.22981200  |
| C | -1.13299200 | -0.91393400 | 0.00810000  |
| C | 0.17369700  | -1.35618500 | -0.01480800 |
| C | 1.41561800  | -0.71315100 | 0.28533700  |
| H | 0.70601100  | 0.86716300  | -1.37474100 |
| H | 1.70950300  | 2.37994000  | -1.08056600 |
| H | 0.65685200  | 0.80728200  | 1.54883000  |
| H | 2.47511500  | 0.90583300  | 1.19529400  |
| H | -0.17316300 | 3.43568400  | 0.07023700  |
| H | -2.24117700 | 2.36361600  | 0.48114900  |
| H | -2.81079900 | 0.23304300  | 0.47492300  |
| H | 0.28996100  | -2.39721300 | -0.31832000 |
| C | -2.18383100 | -2.00158000 | -0.19309100 |
| H | -2.84129100 | -1.76182700 | -1.03557800 |

|   |             |             |             |
|---|-------------|-------------|-------------|
| H | -1.73338700 | -2.97972700 | -0.37627600 |
| H | -2.81642800 | -2.08688400 | 0.69854300  |
| N | 2.56269700  | -1.26768200 | -0.30738100 |
| H | 3.40414400  | -1.20797600 | 0.25281500  |
| H | 2.43875200  | -2.19679800 | -0.68967700 |

2- NH<sub>2</sub>-4-NH<sub>2</sub>-substituted

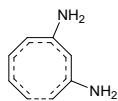

|   |             |             |             |
|---|-------------|-------------|-------------|
| C | -0.41114500 | -1.90314100 | -0.85111700 |
| C | -1.36674000 | -0.75647900 | 0.97669200  |
| C | 0.76568300  | -2.26647000 | -0.25618700 |
| C | 1.76714800  | -1.35547500 | 0.16898800  |
| C | 1.80126500  | 0.01840100  | 0.27693200  |
| C | 0.92641400  | 1.13863500  | 0.00786300  |
| C | -0.44748400 | 1.29538000  | -0.04997300 |
| C | -1.52017900 | 0.42017500  | 0.29166400  |
| H | -0.50100800 | -0.95638300 | -1.36909500 |
| H | -1.15338000 | -2.65582600 | -1.10477300 |
| H | -0.46775300 | -0.92317000 | 1.55328200  |
| H | -2.22767000 | -1.38311900 | 1.19290900  |
| H | 0.91568700  | -3.30840400 | 0.01979900  |
| H | 2.68553600  | -1.82822900 | 0.51589500  |
| H | 2.77232900  | 0.38664500  | 0.60709600  |
| H | -0.77077900 | 2.27303200  | -0.41087800 |
| N | 1.68227600  | 2.32700700  | -0.12675800 |
| H | 2.50656600  | 2.23544700  | -0.70850900 |
| H | 1.14435300  | 3.14580900  | -0.38149500 |
| N | -2.76519200 | 0.72003200  | -0.29054400 |
| H | -3.56569800 | 0.48157200  | 0.28191500  |
| H | -2.84754600 | 1.65719800  | -0.66420200 |

2- NH<sub>2</sub>-4-OH-substituted

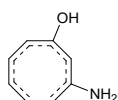

|   |             |             |             |
|---|-------------|-------------|-------------|
| C | 0.15499200  | 1.92368400  | -0.86252000 |
| C | 1.29412300  | 0.90378500  | 0.95736300  |
| C | -1.03850900 | 2.15291300  | -0.23649600 |
| C | -1.92502500 | 1.13092600  | 0.19025500  |
| C | -1.79260500 | -0.23889800 | 0.26752600  |
| C | -0.77714100 | -1.22767400 | 0.00056900  |
| C | 0.59818200  | -1.25755200 | -0.01971600 |
| C | 1.57063100  | -0.26213600 | 0.29307000  |
| H | 0.33130000  | 0.98717300  | -1.37739900 |
| H | 0.80002000  | 2.75380000  | -1.13795700 |
| H | 0.38824700  | 0.98103000  | 1.54282700  |
| H | 2.08503800  | 1.61859100  | 1.16996600  |
| H | -1.29858700 | 3.17010700  | 0.04853100  |
| H | -2.88868500 | 1.48775500  | 0.55119000  |
| H | -2.71322100 | -0.72796300 | 0.59096600  |
| H | 1.00060700  | -2.21996000 | -0.32949200 |



|   |             |             |             |
|---|-------------|-------------|-------------|
| O | -1.30725500 | -2.49032400 | -0.20734000 |
| H | -2.22538600 | -2.41298200 | -0.49922600 |
| N | 2.86222600  | -0.53544500 | -0.18090100 |
| H | 3.52641200  | 0.21931100  | -0.06475900 |
| H | 2.90883600  | -0.93645200 | -1.10992500 |

2- NH<sub>2</sub>-4-F-substituted

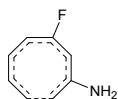

|   |             |             |             |
|---|-------------|-------------|-------------|
| C | 0.01675200  | -1.95530400 | -0.82535600 |
| C | -1.21582600 | -0.96637400 | 1.00000800  |
| C | 1.22267600  | -2.05402700 | -0.19704900 |
| C | 2.04349200  | -0.94682700 | 0.15347300  |
| C | 1.79639200  | 0.40612400  | 0.19324100  |
| C | 0.66749500  | 1.26507000  | -0.00214700 |
| C | -0.69896300 | 1.21391000  | -0.01484000 |
| C | -1.58957000 | 0.13427500  | 0.28293600  |
| H | -0.25995500 | -1.05598600 | -1.36194900 |
| H | -0.56540200 | -2.84441700 | -1.05109500 |
| H | -0.30541500 | -0.94268300 | 1.58255900  |
| H | -1.92735400 | -1.76072300 | 1.20823300  |
| H | 1.57082000  | -3.03364900 | 0.12437900  |
| H | 3.05542000  | -1.20777700 | 0.45942600  |
| H | 2.67463100  | 1.01269500  | 0.40499300  |
| H | -1.15905100 | 2.15524500  | -0.31033500 |
| F | 1.12145900  | 2.54763700  | -0.19021300 |
| N | -2.84678400 | 0.18521600  | -0.33639100 |
| H | -3.60695100 | -0.21075900 | 0.20227600  |
| H | -3.09707700 | 1.08172800  | -0.73343800 |

2- NH<sub>2</sub>-4-CHO-substituted

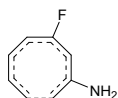

|   |             |             |             |
|---|-------------|-------------|-------------|
| C | -1.73830000 | 1.38708900  | 0.84785900  |
| C | -1.86900500 | -0.13366400 | -0.94142800 |
| C | -0.99408000 | 2.33436700  | 0.20143500  |
| C | 0.36815300  | 2.18065700  | -0.16756100 |
| C | 1.19502400  | 1.07782400  | -0.21190200 |
| C | 1.08790100  | -0.34175500 | -0.01660900 |
| C | 0.07705200  | -1.28727400 | -0.00327300 |
| C | -1.31777600 | -1.19726400 | -0.27480500 |
| H | -1.25017000 | 0.59570000  | 1.40277800  |
| H | -2.77941400 | 1.57723100  | 1.09487200  |
| H | -1.22742500 | 0.51360500  | -1.52342300 |
| H | -2.93127800 | -0.11545400 | -1.17330900 |
| H | -1.48273900 | 3.25296400  | -0.11909100 |
| H | 0.85778000  | 3.10203900  | -0.48026200 |
| H | 2.23147400  | 1.33775400  | -0.42148900 |
| H | 0.39773300  | -2.29534400 | 0.26540900  |
| C | 2.43530000  | -0.99300500 | 0.15234400  |
| H | 2.39798200  | -2.08074400 | 0.36609300  |

|   |            |            |           |
|---|------------|------------|-----------|
| O | 3.5031000  | -0.4339050 | 0.0677310 |
| N | -2.1002430 | -2.2655400 | 0.1928790 |
| H | -3.0949830 | -2.1604980 | 0.0365170 |
| H | -1.9076720 | -2.5590790 | 1.1435430 |

2-NH<sub>2</sub>-4-CN-substituted

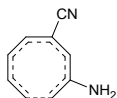

|   |            |            |            |
|---|------------|------------|------------|
| C | 1.9317540  | -1.0104200 | 0.9025170  |
| C | 1.7118090  | 0.5125580  | -0.9754150 |
| C | 1.4459170  | -2.0981150 | 0.2413620  |
| C | 0.0955540  | -2.2723860 | -0.1736400 |
| C | -0.9682090 | -1.4044630 | -0.2652730 |
| C | -1.2010170 | 0.0099480  | -0.0658290 |
| C | -0.4485390 | 1.1692090  | -0.0230680 |
| C | 0.9378900  | 1.4007150  | -0.2837170 |
| H | 1.2710880  | -0.3191870 | 1.4105160  |
| H | 2.9835170  | -0.9491110 | 1.1684190  |
| H | 1.2394010  | -0.2794920 | -1.5392900 |
| H | 2.7562760  | 0.7276780  | -1.1842720 |
| H | 2.1407590  | -2.8829520 | -0.0521670 |
| H | -0.1512910 | -3.2847220 | -0.4895740 |
| H | -1.8969480 | -1.9103250 | -0.5215430 |
| H | -1.0122260 | 2.0575040  | 0.2587990  |
| C | -2.6214700 | 0.2802370  | 0.0911460  |
| N | -3.7534620 | 0.4890420  | 0.2196140  |
| N | 1.5085740  | 2.5296820  | 0.3207800  |
| H | 2.2325100  | 2.9869800  | -0.2194530 |
| H | 0.8489920  | 3.1988650  | 0.6973150  |

2-NH<sub>2</sub>-4-NO<sub>2</sub>-substituted

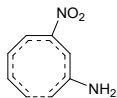

|   |            |            |            |
|---|------------|------------|------------|
| C | 2.2747420  | -0.9670910 | 0.9019190  |
| C | 2.0485400  | 0.5666310  | -0.9226090 |
| C | 1.8485650  | -2.0614300 | 0.2070920  |
| C | 0.5169540  | -2.2777440 | -0.2388070 |
| C | -0.5851880 | -1.4553930 | -0.3161940 |
| C | -0.8600940 | -0.0661780 | -0.1028270 |
| C | -0.1799250 | 1.1255160  | -0.0525410 |
| C | 1.2008890  | 1.4146390  | -0.2627220 |
| H | 1.5678440  | -0.3338580 | 1.4234290  |
| H | 3.3156140  | -0.8725700 | 1.1994010  |
| H | 1.6400340  | -0.2321700 | -1.5259390 |
| H | 3.0824580  | 0.8477490  | -1.1066750 |
| H | 2.5829050  | -2.8064180 | -0.0937240 |
| H | 0.3220000  | -3.2855940 | -0.6010450 |
| H | -1.4876040 | -1.9896840 | -0.5932490 |
| H | -0.7896230 | 1.9873630  | 0.2012080  |
| N | -2.3558160 | 0.1548790  | 0.0645890  |
| O | -2.7974830 | 1.2816160  | -0.0741190 |

|   |             |             |            |
|---|-------------|-------------|------------|
| O | -3.04241700 | -0.80993100 | 0.34806700 |
| N | 1.63840800  | 2.63832200  | 0.25912300 |
| H | 2.63283600  | 2.80859800  | 0.18054000 |
| H | 1.28768200  | 2.87699800  | 1.17861800 |

2-OH-4-CH<sub>3</sub>-substituted

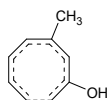

|   |             |             |             |
|---|-------------|-------------|-------------|
| C | 0.98841400  | 1.70073900  | -0.84628200 |
| C | 1.57843900  | 0.33185000  | 0.89876200  |
| C | -0.01128400 | 2.39715900  | -0.21369900 |
| C | -1.23939300 | 1.83305400  | 0.20036300  |
| C | -1.69965700 | 0.52684400  | 0.25293000  |
| C | -1.21479200 | -0.80274300 | 0.00089200  |
| C | 0.04563900  | -1.37200600 | -0.04757300 |
| C | 1.32841700  | -0.85564800 | 0.26268600  |
| H | 0.75364000  | 0.80254300  | -1.40364300 |
| H | 1.91397100  | 2.20168100  | -1.11860300 |
| H | 0.79326000  | 0.77359100  | 1.49549100  |
| H | 2.59865100  | 0.63651100  | 1.12190500  |
| H | 0.17397300  | 3.42835500  | 0.08157400  |
| H | -1.97117800 | 2.55854000  | 0.55414400  |
| H | -2.75945600 | 0.49612000  | 0.51163900  |
| H | 0.08534500  | -2.40824000 | -0.37636000 |
| C | -2.36570000 | -1.78316100 | -0.19984900 |
| H | -3.01762400 | -1.46320800 | -1.01952000 |
| H | -2.00959300 | -2.79213700 | -0.41793200 |
| H | -2.98203000 | -1.83398200 | 0.70566300  |
| O | 2.34665500  | -1.61333200 | -0.26480000 |
| H | 3.18730300  | -1.34964200 | 0.13465900  |

2-OH-4-NH<sub>2</sub>-substituted

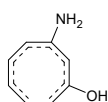

|   |             |             |             |
|---|-------------|-------------|-------------|
| C | 0.56535800  | 1.85471900  | -0.85138300 |
| C | 1.45545600  | 0.66276600  | 0.90872100  |
| C | -0.57305700 | 2.31635500  | -0.23902400 |
| C | -1.63440800 | 1.49011900  | 0.19872700  |
| C | -1.78476400 | 0.11908500  | 0.29111900  |
| C | -1.01348200 | -1.06468600 | 0.00254300  |
| C | 0.34640200  | -1.33213800 | -0.07496100 |
| C | 1.47203700  | -0.55097100 | 0.27023200  |
| H | 0.54902600  | 0.91683800  | -1.39310600 |
| H | 1.35337100  | 2.55006800  | -1.12993100 |
| H | 0.59495800  | 0.92233400  | 1.50895100  |
| H | 2.38463800  | 1.18518600  | 1.12374800  |
| H | -0.63099700 | 3.36637500  | 0.04039600  |
| H | -2.50385900 | 2.03394600  | 0.56675800  |
| H | -2.78244400 | -0.16740800 | 0.62312700  |
| H | 0.61419500  | -2.31794900 | -0.45063800 |
| N | -1.85592800 | -2.18884100 | -0.13144300 |

|   |             |             |             |
|---|-------------|-------------|-------------|
| H | -2.68691200 | -2.03405100 | -0.68902100 |
| H | -1.38601300 | -3.04514700 | -0.39607800 |
| O | 2.63642100  | -1.05685400 | -0.25766300 |
| H | 3.39291100  | -0.60495800 | 0.14135700  |

2-OH-4-OH-substituted

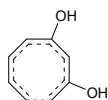

|   |             |             |             |
|---|-------------|-------------|-------------|
| C | 0.27262400  | 1.90543100  | -0.86352700 |
| C | 1.35822700  | 0.83957300  | 0.91090900  |
| C | -0.90439400 | 2.20120100  | -0.22617500 |
| C | -1.83680700 | 1.23308700  | 0.21649500  |
| C | -1.78634300 | -0.14597100 | 0.28765800  |
| C | -0.84094500 | -1.18895600 | -0.00463100 |
| C | 0.53320100  | -1.29063700 | -0.06059100 |
| C | 1.54343800  | -0.35566500 | 0.26834300  |
| H | 0.38632300  | 0.96737800  | -1.39292600 |
| H | 0.95259600  | 2.70249300  | -1.15269300 |
| H | 0.46729900  | 0.97988400  | 1.50638100  |
| H | 2.20229800  | 1.49213900  | 1.12102700  |
| H | -1.10628500 | 3.23227400  | 0.05627300  |
| H | -2.77084000 | 1.64381900  | 0.59736100  |
| H | -2.73136700 | -0.57829600 | 0.62104700  |
| H | 0.89647400  | -2.25049700 | -0.41678100 |
| O | -1.43974700 | -2.41824400 | -0.20739600 |
| H | -2.35869400 | -2.29303700 | -0.47988100 |
| O | 2.76163900  | -0.69869100 | -0.26291900 |
| H | 3.45305000  | -0.14905100 | 0.13182900  |

2-OH-4-F-substituted

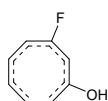

|   |             |             |             |
|---|-------------|-------------|-------------|
| C | 0.04173400  | 1.94040100  | -0.83062900 |
| C | 1.26048200  | 0.96176800  | 0.92223200  |
| C | -1.15604400 | 2.08311900  | -0.18332900 |
| C | -1.99635700 | 1.00611100  | 0.19085500  |
| C | -1.79094400 | -0.35886900 | 0.21539600  |
| C | -0.69924200 | -1.24938100 | -0.00849300 |
| C | 0.67200400  | -1.23682000 | -0.04621900 |
| C | 1.57894400  | -0.19072500 | 0.25876700  |
| H | 0.25770000  | 1.03764200  | -1.38921200 |
| H | 0.63493900  | 2.81406800  | -1.08636300 |
| H | 0.36366800  | 0.98724500  | 1.52491000  |
| H | 2.01964300  | 1.71184800  | 1.13009100  |
| H | -1.46734800 | 3.07574700  | 0.13554500  |
| H | -2.98956700 | 1.29676700  | 0.52913800  |
| H | -2.68606200 | -0.93686100 | 0.43635000  |
| H | 1.12535500  | -2.17025500 | -0.36813400 |
| F | -1.19008300 | -2.51537800 | -0.19719800 |
| O | 2.81707300  | -0.39185800 | -0.29352700 |
| H | 3.45237000  | 0.22344100  | 0.09919300  |

## 2-OH-4-CHO-substituted

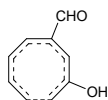

|   |             |             |             |
|---|-------------|-------------|-------------|
| C | -1.78986300 | 1.32531400  | 0.87017500  |
| C | -1.89211500 | -0.21284800 | -0.93890100 |
| C | -1.08510500 | 2.28581800  | 0.20137900  |
| C | 0.27741300  | 2.17829500  | -0.18513900 |
| C | 1.14709500  | 1.10847100  | -0.22820900 |
| C | 1.09393800  | -0.30968900 | -0.01570200 |
| C | 0.11064600  | -1.28452200 | 0.01464500  |
| C | -1.27798000 | -1.23322100 | -0.27281800 |
| H | -1.27341900 | 0.54690700  | 1.41687500  |
| H | -2.83447300 | 1.48075400  | 1.12479800  |
| H | -1.29008000 | 0.47733900  | -1.51160400 |
| H | -2.95490100 | -0.27422900 | -1.15033600 |
| H | -1.60844300 | 3.18447400  | -0.12090200 |
| H | 0.72704800  | 3.11454000  | -0.51306400 |
| H | 2.17112700  | 1.40573900  | -0.44900400 |
| H | 0.46668200  | -2.27747500 | 0.30015900  |
| C | 2.46206100  | -0.91331800 | 0.15846600  |
| H | 2.46197400  | -1.99886600 | 0.38798100  |
| O | 3.50941800  | -0.31960400 | 0.06350900  |
| O | -2.07580600 | -2.25069100 | 0.18968100  |
| H | -1.61095600 | -2.76262400 | 0.86619100  |

## 2-OH-4-CN-substituted

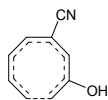

|   |             |             |             |
|---|-------------|-------------|-------------|
| C | 2.01196200  | 0.99228300  | -0.88021400 |
| C | 1.77173200  | -0.60301600 | 0.87681300  |
| C | 1.50194700  | 2.07481200  | -0.20675700 |
| C | 0.16127700  | 2.25886900  | 0.20799900  |
| C | -0.94017200 | 1.41985300  | 0.27204900  |
| C | -1.21868300 | 0.02429800  | 0.05608900  |
| C | -0.48179400 | -1.15849800 | -0.01500800 |
| C | 0.88162200  | -1.44022400 | 0.24545400  |
| H | 1.37025300  | 0.33380900  | -1.44651300 |
| H | 3.06625800  | 0.96249800  | -1.13884700 |
| H | 1.39757100  | 0.20383500  | 1.48574300  |
| H | 2.78978500  | -0.92973000 | 1.07195100  |
| H | 2.19768300  | 2.85310900  | 0.10302700  |
| H | -0.05805000 | 3.26697000  | 0.55665500  |
| H | -1.85135600 | 1.95690600  | 0.52655000  |
| H | -1.04408100 | -2.03488000 | -0.32454400 |
| C | -2.64109400 | -0.20929700 | -0.09119200 |
| N | -3.78508300 | -0.38540000 | -0.21220200 |
| O | 1.27686500  | -2.64721800 | -0.27976200 |
| H | 2.13181400  | -2.89145200 | 0.09808700  |

2-OH-4-NO<sub>2</sub>-substituted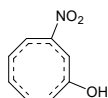

|   |             |             |             |
|---|-------------|-------------|-------------|
| C | -2.37630200 | 0.91855000  | 0.91209400  |
| C | -2.07986900 | -0.60327000 | -0.90610500 |
| C | -1.89609500 | 2.03469000  | 0.27239200  |
| C | -0.56368500 | 2.27063100  | -0.14357600 |
| C | 0.56401300  | 1.47040800  | -0.24491800 |
| C | 0.86802200  | 0.09219100  | -0.07074900 |
| C | 0.19228600  | -1.11286000 | -0.03257700 |
| C | -1.16072500 | -1.42939600 | -0.30227100 |
| H | -1.71798300 | 0.25599700  | 1.45368400  |
| H | -3.42886100 | 0.85434400  | 1.17175700  |
| H | -1.73507200 | 0.23832200  | -1.48459100 |
| H | -3.08503900 | -0.95976000 | -1.11545700 |
| H | -2.61397200 | 2.80403700  | -0.00819700 |
| H | -0.37955600 | 3.29451000  | -0.46511700 |
| H | 1.46018200  | 2.02637400  | -0.49636900 |
| H | 0.79625000  | -1.96329100 | 0.26087400  |
| N | 2.37828900  | -0.12412900 | 0.06857300  |
| O | 2.77641500  | -1.21952600 | 0.45742800  |
| O | 3.13105600  | 0.80740300  | -0.20860000 |
| O | -1.51530400 | -2.66368400 | 0.18703900  |
| H | -2.36717500 | -2.92083400 | -0.18927000 |

2-F-4-CH<sub>3</sub>-substituted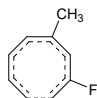

|   |             |             |             |
|---|-------------|-------------|-------------|
| C | 1.26388700  | 1.51914200  | -0.85518200 |
| C | 1.65745100  | 0.07692200  | 0.88400000  |
| C | 0.38761500  | 2.35343300  | -0.20495800 |
| C | -0.91402800 | 1.99482800  | 0.21037300  |
| C | -1.58918000 | 0.78358100  | 0.25315600  |
| C | -1.33078500 | -0.60315900 | -0.00130700 |
| C | -0.16973700 | -1.35901600 | -0.05534300 |
| C | 1.16016800  | -1.03549200 | 0.27223000  |
| H | 0.88922000  | 0.67455100  | -1.41953200 |
| H | 2.25348500  | 1.87385800  | -1.13060100 |
| H | 0.99258800  | 0.66980000  | 1.49460700  |
| H | 2.72443800  | 0.14811500  | 1.06786000  |
| H | 0.73635600  | 3.33851800  | 0.09997500  |
| H | -1.51374300 | 2.82982000  | 0.57083800  |
| H | -2.64049300 | 0.93059000  | 0.50663200  |
| H | -0.28176000 | -2.38765700 | -0.39051500 |
| C | -2.61994800 | -1.39170800 | -0.19954400 |
| H | -3.23145100 | -0.95541500 | -0.99593600 |
| H | -2.42374800 | -2.43639200 | -0.44995900 |
| H | -3.21895300 | -1.37572500 | 0.71873900  |
| F | 2.07126800  | -1.92680500 | -0.21029500 |

2-F-4-NH<sub>2</sub>-substituted

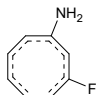

|   |             |             |             |
|---|-------------|-------------|-------------|
| C | 0.83716900  | 1.75718700  | -0.85376400 |
| C | 1.57495200  | 0.46854900  | 0.89606100  |
| C | -0.22620400 | 2.36298200  | -0.22945600 |
| C | -1.39395000 | 1.69460300  | 0.20208900  |
| C | -1.74657700 | 0.35864400  | 0.28455600  |
| C | -1.15366000 | -0.92018300 | 0.00058000  |
| C | 0.16267300  | -1.36383300 | -0.08067200 |
| C | 1.36176900  | -0.73134700 | 0.28157400  |
| H | 0.68643400  | 0.83677500  | -1.40416300 |
| H | 1.71053900  | 2.34091700  | -1.13191600 |
| H | 0.78873600  | 0.88167700  | 1.51113100  |
| H | 2.59372300  | 0.79508300  | 1.07473200  |
| H | -0.13674000 | 3.40833200  | 0.05918200  |
| H | -2.17460300 | 2.35687900  | 0.57449600  |
| H | -2.77835700 | 0.22192500  | 0.60785300  |
| H | 0.30573500  | -2.37319000 | -0.46082400 |
| N | -2.13515700 | -1.92144400 | -0.12876200 |
| H | -2.94678200 | -1.66211700 | -0.67550000 |
| H | -1.78844000 | -2.83740100 | -0.38249600 |
| F | 2.46542500  | -1.36426500 | -0.20855200 |

#### 2-F-4-OH-substituted

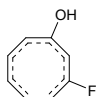

|   |             |             |             |
|---|-------------|-------------|-------------|
| C | 0.41089000  | 1.88785900  | -0.86990100 |
| C | 1.44832900  | 0.77423800  | 0.89135100  |
| C | -0.73942200 | 2.24959800  | -0.21565700 |
| C | -1.73316700 | 1.34597600  | 0.22545500  |
| C | -1.78501400 | -0.03542000 | 0.28436000  |
| C | -0.91679200 | -1.13817200 | -0.00697400 |
| C | 0.45227400  | -1.31924100 | -0.06620600 |
| C | 1.49485000  | -0.44126500 | 0.27708600  |
| H | 0.45774700  | 0.95098500  | -1.41097600 |
| H | 1.13548900  | 2.64378900  | -1.16023800 |
| H | 0.58902200  | 1.01691200  | 1.49891000  |
| H | 2.37250600  | 1.31487400  | 1.06485000  |
| H | -0.86981000 | 3.28901900  | 0.07829300  |
| H | -2.63341900 | 1.81952900  | 0.61444700  |
| H | -2.76143300 | -0.39924900 | 0.60869100  |
| H | 0.76658400  | -2.29642000 | -0.42123400 |
| O | -1.58590400 | -2.32872200 | -0.20592800 |
| H | -2.49874500 | -2.15267500 | -0.47161300 |
| F | 2.70417800  | -0.83315900 | -0.20786600 |

#### 2-F-4-F-substituted

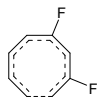

|   |             |             |             |
|---|-------------|-------------|-------------|
| C | -0.09283500 | -1.93936000 | -0.84214300 |
| C | -1.30793400 | -0.96437700 | 0.90370800  |
| C | 1.09429300  | -2.10201300 | -0.17736600 |
| C | 1.95527500  | -1.04597200 | 0.20377300  |
| C | 1.78726100  | 0.32606800  | 0.21986500  |
| C | 0.72177200  | 1.24026800  | -0.01083900 |
| C | -0.65223300 | 1.24627000  | -0.05582500 |
| C | -1.55271700 | 0.21320900  | 0.26773300  |
| H | -0.28170800 | -1.03421000 | -1.40634500 |
| H | -0.69785200 | -2.80229300 | -1.10522500 |
| H | -0.41988700 | -1.04712100 | 1.51346100  |
| H | -2.12382100 | -1.65667200 | 1.08088500  |
| H | 1.38039500  | -3.10061300 | 0.14662100  |
| H | 2.93606300  | -1.36147800 | 0.55531100  |
| H | 2.69720100  | 0.88071100  | 0.44044000  |
| H | -1.09785300 | 2.18129400  | -0.38320700 |
| F | 1.23271600  | 2.49573700  | -0.19904200 |
| F | -2.80047500 | 0.40379900  | -0.23377900 |

#### 2-F-4-CHO-substituted

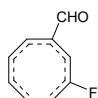

|   |             |             |             |
|---|-------------|-------------|-------------|
| C | -1.81754300 | 1.27225600  | 0.87375300  |
| C | -1.92179700 | -0.24492000 | -0.88456800 |
| C | -1.13387200 | 2.24723700  | 0.19432100  |
| C | 0.22009500  | 2.16580100  | -0.21330700 |
| C | 1.12002000  | 1.11608700  | -0.24764100 |
| C | 1.10508100  | -0.29342700 | -0.00698900 |
| C | 0.13701800  | -1.28598600 | 0.05024400  |
| C | -1.23122800 | -1.24416300 | -0.26574900 |
| H | -1.27986900 | 0.51811700  | 1.43392200  |
| H | -2.85759700 | 1.42341500  | 1.14941800  |
| H | -1.37027100 | 0.46802600  | -1.47922500 |
| H | -2.98252300 | -0.36812300 | -1.07731500 |
| H | -1.67862600 | 3.13554300  | -0.12128400 |
| H | 0.64005700  | 3.10642600  | -0.56626700 |
| H | 2.13418100  | 1.43801500  | -0.48072800 |
| H | 0.47617300  | -2.26724900 | 0.38113600  |
| C | 2.48557100  | -0.86559800 | 0.17667300  |
| H | 2.50637400  | -1.94107200 | 0.44542800  |
| O | 3.51878900  | -0.25373600 | 0.04937200  |
| F | -1.94647600 | -2.29854700 | 0.20661300  |

#### 2-F-4-CN-substituted

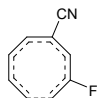



|   |             |             |             |
|---|-------------|-------------|-------------|
| C | 1.97110600  | -0.90135100 | 0.91710000  |
| C | 1.76965100  | 0.60761900  | -0.87823700 |
| C | 1.54413200  | -2.00136400 | 0.22293000  |
| C | 0.21845000  | -2.22933300 | -0.22164300 |
| C | -0.89782400 | -1.41758600 | -0.29243400 |
| C | -1.20580500 | -0.03205400 | -0.06028200 |
| C | -0.49511200 | 1.15810600  | 0.01496800  |
| C | 0.85888700  | 1.41572300  | -0.27015800 |
| H | 1.26472800  | -0.28003800 | 1.45275700  |
| H | 3.01137400  | -0.81211300 | 1.21743000  |
| H | 1.41585300  | -0.21822000 | -1.47734600 |
| H | 2.77916000  | 0.97019700  | -1.04157600 |
| H | 2.28216900  | -2.74414800 | -0.07476900 |
| H | 0.03272800  | -3.23986500 | -0.58141800 |
| H | -1.79526200 | -1.97120200 | -0.56100500 |
| H | -1.05744800 | 2.03355200  | 0.32955000  |
| C | -2.63635800 | 0.17075600  | 0.09642400  |
| N | -3.77738300 | 0.32093300  | 0.22439700  |
| F | 1.30507000  | 2.59913400  | 0.22151100  |

#### 2-F-4-NO<sub>2</sub>-substituted

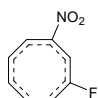

|   |             |             |             |
|---|-------------|-------------|-------------|
| C | -2.30586000 | 0.82912500  | 0.96255600  |
| C | -2.08109800 | -0.58191900 | -0.91663000 |
| C | -1.90759800 | 1.96895700  | 0.31727900  |
| C | -0.59220700 | 2.24563900  | -0.13015100 |
| C | 0.54253300  | 1.46537100  | -0.25210000 |
| C | 0.86073500  | 0.08957200  | -0.07516900 |
| C | 0.19991700  | -1.11852800 | -0.04982500 |
| C | -1.14679200 | -1.39371800 | -0.35115600 |
| H | -1.58185800 | 0.19430500  | 1.45688300  |
| H | -3.34071400 | 0.70486800  | 1.26901300  |
| H | -1.75486400 | 0.28367000  | -1.47379800 |
| H | -3.08035600 | -0.96537300 | -1.09511800 |
| H | -2.66332200 | 2.71067900  | 0.06464700  |
| H | -0.43370000 | 3.27446500  | -0.44811200 |
| H | 1.42592000  | 2.03576700  | -0.51887300 |
| H | 0.78898300  | -1.98062200 | 0.24497200  |
| N | 2.36041500  | -0.11145700 | 0.07727300  |
| O | 2.74213500  | -1.11806100 | 0.64339800  |
| O | 3.10282900  | 0.74113500  | -0.37116700 |
| F | -1.56227600 | -2.60990500 | 0.08364400  |

#### 2-CHO-4-CH<sub>3</sub>-substituted

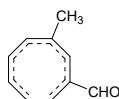

|   |             |            |             |
|---|-------------|------------|-------------|
| C | 0.19258700  | 1.90079300 | -0.90138400 |
| C | 1.10664600  | 0.77249200 | 0.96323100  |
| C | -0.92719900 | 2.30543600 | -0.23331900 |

|   |             |             |             |
|---|-------------|-------------|-------------|
| C | -1.98526600 | 1.45525800  | 0.19365400  |
| C | -2.10322700 | 0.08323300  | 0.25668900  |
| C | -1.28911900 | -1.08176700 | 0.00450700  |
| C | 0.07529400  | -1.28748600 | 0.00706700  |
| C | 1.17638100  | -0.44552400 | 0.34029400  |
| H | 0.21154600  | 0.94408200  | -1.40753000 |
| H | 0.95964200  | 2.61632300  | -1.18369300 |
| H | 0.22551800  | 1.05413600  | 1.52243900  |
| H | 2.02747400  | 1.31919200  | 1.14991500  |
| H | -1.00374700 | 3.34984900  | 0.06549600  |
| H | -2.87198700 | 1.98461800  | 0.53939200  |
| H | -3.12014500 | -0.21604900 | 0.51769500  |
| H | 0.37705200  | -2.28828000 | -0.30504600 |
| C | -2.14668000 | -2.31500300 | -0.24964900 |
| H | -2.84989900 | -2.14702200 | -1.07210100 |
| H | -1.53938300 | -3.18948900 | -0.49322300 |
| H | -2.73936800 | -2.55739100 | 0.64073600  |
| C | 2.51011900  | -0.90405100 | -0.13179900 |
| H | 2.54330700  | -1.94398800 | -0.51919800 |
| O | 3.51534500  | -0.22828300 | -0.11882800 |

#### 2-CHO-4-NH<sub>2</sub>-substituted

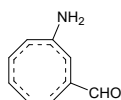

|   |             |             |             |
|---|-------------|-------------|-------------|
| C | 0.08386600  | 1.88152100  | -0.89991000 |
| C | 1.06555100  | 0.82016300  | 0.95384700  |
| C | -1.06643300 | 2.24368900  | -0.25616900 |
| C | -2.06885000 | 1.34360800  | 0.19639400  |
| C | -2.11429900 | -0.02982000 | 0.29212200  |
| C | -1.24440100 | -1.14676300 | 0.00410600  |
| C | 0.13450200  | -1.28301000 | -0.02477300 |
| C | 1.18579700  | -0.40004200 | 0.33847900  |
| H | 0.15178700  | 0.91978300  | -1.39269900 |
| H | 0.81178100  | 2.63188900  | -1.19534700 |
| H | 0.17745800  | 1.06784000  | 1.51804800  |
| H | 1.96552800  | 1.40092200  | 1.13712600  |
| H | -1.20254400 | 3.28759300  | 0.02071300  |
| H | -2.97217800 | 1.82746900  | 0.56486600  |
| H | -3.08717600 | -0.39597000 | 0.62007100  |
| H | 0.47805000  | -2.25621400 | -0.37999800 |
| N | -1.99408100 | -2.33057600 | -0.17239800 |
| H | -2.80017800 | -2.23677800 | -0.77872200 |
| H | -1.44856200 | -3.14844100 | -0.41360900 |
| C | 2.54099800  | -0.80064100 | -0.13069900 |
| H | 2.61585600  | -1.83319400 | -0.53285200 |
| O | 3.52104500  | -0.09038600 | -0.10014900 |

#### 2-CHO-4-OH-substituted

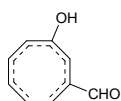

|   |            |            |             |
|---|------------|------------|-------------|
| C | 0.00460700 | 1.87865500 | -0.90440000 |
|---|------------|------------|-------------|

|   |             |             |             |
|---|-------------|-------------|-------------|
| C | 1.05178300  | 0.83078100  | 0.96203300  |
| C | -1.14362400 | 2.20234700  | -0.24028100 |
| C | -2.12010600 | 1.27076500  | 0.20800600  |
| C | -2.12054800 | -0.10437000 | 0.27970800  |
| C | -1.19898400 | -1.17370800 | -0.00260900 |
| C | 0.17296700  | -1.29608800 | -0.00769000 |
| C | 1.20254800  | -0.38024300 | 0.34019400  |
| H | 0.10254800  | 0.91629600  | -1.39082600 |
| H | 0.70796800  | 2.65017000  | -1.20399700 |
| H | 0.15648100  | 1.05812700  | 1.52359500  |
| H | 1.93392600  | 1.44062800  | 1.13820900  |
| H | -1.30855200 | 3.24025800  | 0.04284100  |
| H | -3.03802900 | 1.72205500  | 0.58087400  |
| H | -3.08346600 | -0.50801300 | 0.59809600  |
| H | 0.50525600  | -2.27753200 | -0.34396600 |
| O | -1.82619000 | -2.38276500 | -0.24281700 |
| H | -2.72203400 | -2.23084800 | -0.57273200 |
| C | 2.56718400  | -0.74750900 | -0.13437300 |
| H | 2.66844300  | -1.77982400 | -0.52863100 |
| O | 3.52400300  | -0.00662300 | -0.11305800 |

#### 2-CHO-4-F-substituted

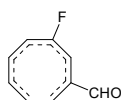

|   |             |             |             |
|---|-------------|-------------|-------------|
| C | -0.04329500 | 1.89905000  | -0.87379800 |
| C | 1.03093000  | 0.81954500  | 0.98957700  |
| C | -1.19370800 | 2.17639500  | -0.19761500 |
| C | -2.17705900 | 1.21613600  | 0.17784400  |
| C | -2.15010500 | -0.15766600 | 0.20467800  |
| C | -1.16658900 | -1.17612700 | -0.00668000 |
| C | 0.19489300  | -1.31040700 | 0.01261800  |
| C | 1.21347400  | -0.37030200 | 0.34190900  |
| H | 0.07592500  | 0.95501000  | -1.39124000 |
| H | 0.65525300  | 2.68920600  | -1.13268000 |
| H | 0.12765800  | 1.01221300  | 1.55235500  |
| H | 1.89109900  | 1.45942600  | 1.16767600  |
| H | -1.37411500 | 3.19956400  | 0.12740000  |
| H | -3.12576800 | 1.63934600  | 0.50272300  |
| H | -3.11420300 | -0.62033300 | 0.40860400  |
| H | 0.53074600  | -2.30141200 | -0.29003500 |
| F | -1.80206000 | -2.36531100 | -0.24983700 |
| C | 2.58050800  | -0.69694300 | -0.15283700 |
| H | 2.70603100  | -1.72375600 | -0.55419800 |
| O | 3.51395200  | 0.07255600  | -0.13953100 |

#### 2-CHO-4-CHO-substituted

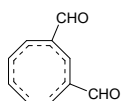

|   |             |            |             |
|---|-------------|------------|-------------|
| C | 0.63267200  | 2.15321200 | -0.90968200 |
| C | 1.42641300  | 1.03896700 | 0.96041100  |
| C | -0.48082000 | 2.64709200 | -0.28611000 |

|   |             |             |             |
|---|-------------|-------------|-------------|
| C | -1.60904800 | 1.87969200  | 0.11210300  |
| C | -1.80727400 | 0.51937700  | 0.20643400  |
| C | -1.02667200 | -0.67749900 | 0.05188400  |
| C | 0.31890600  | -0.99636900 | 0.08919400  |
| C | 1.46083500  | -0.21916900 | 0.40552000  |
| H | 0.59410000  | 1.19391500  | -1.41022400 |
| H | 1.44322900  | 2.81792100  | -1.19517200 |
| H | 0.55130600  | 1.37349000  | 1.49996000  |
| H | 2.35854000  | 1.55959800  | 1.17430100  |
| H | -0.49776700 | 3.70194100  | -0.01549500 |
| H | -2.47899100 | 2.47048700  | 0.39336300  |
| H | -2.84498500 | 0.25632100  | 0.40913800  |
| H | 0.56223400  | -2.02738300 | -0.17122300 |
| C | -1.88410400 | -1.90017100 | -0.13467900 |
| H | -1.32024300 | -2.83182600 | -0.33918700 |
| O | -3.09042400 | -1.92195700 | -0.06797400 |
| C | 2.78980700  | -0.77573300 | 0.04443500  |
| H | 3.64608800  | -0.09502400 | 0.23388200  |
| O | 2.97319900  | -1.88252300 | -0.40907700 |

#### 2-CHO-4-CN-substituted

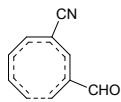

|   |             |             |             |
|---|-------------|-------------|-------------|
| C | 0.93431100  | 1.84691300  | -0.97338200 |
| C | 1.49573500  | 0.48800200  | 0.96436700  |
| C | 0.04358500  | 2.58757600  | -0.25906100 |
| C | -1.23368200 | 2.14367200  | 0.20086000  |
| C | -1.79551500 | 0.89516800  | 0.30004200  |
| C | -1.36412200 | -0.47092700 | 0.08211200  |
| C | -0.15400300 | -1.13794300 | 0.06738000  |
| C | 1.16645800  | -0.68925400 | 0.35168000  |
| H | 0.63288300  | 0.92072400  | -1.44662500 |
| H | 1.88450400  | 2.26867600  | -1.28780400 |
| H | 0.75721600  | 1.05407400  | 1.51471200  |
| H | 2.54531400  | 0.72380400  | 1.12111400  |
| H | 0.32595300  | 3.59898700  | 0.02872700  |
| H | -1.89180800 | 2.94298200  | 0.53643900  |
| H | -2.84836800 | 0.92761900  | 0.57482900  |
| H | -0.22444900 | -2.18750700 | -0.21792300 |
| C | -2.49912100 | -1.35412800 | -0.12194800 |
| N | -3.41039800 | -2.04937400 | -0.28733500 |
| C | 2.27541700  | -1.56023600 | -0.13275300 |
| H | 1.97007600  | -2.56339400 | -0.49427200 |
| O | 3.43838500  | -1.22917500 | -0.14920500 |

#### 2-CHO-4-NO<sub>2</sub>-substituted

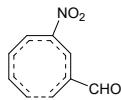

|   |            |            |             |
|---|------------|------------|-------------|
| C | 1.53142600 | 1.74861700 | -1.02382900 |
| C | 1.85438100 | 0.38764100 | 0.97823900  |

|   |             |             |             |
|---|-------------|-------------|-------------|
| C | 0.76633600  | 2.64417000  | -0.34255100 |
| C | -0.56705500 | 2.42863000  | 0.12268500  |
| C | -1.32671800 | 1.29450100  | 0.26883800  |
| C | -1.10346600 | -0.11204800 | 0.09562800  |
| C | -0.03911600 | -0.97515600 | 0.11500800  |
| C | 1.33471600  | -0.73768600 | 0.40251000  |
| H | 1.09318200  | 0.86195500  | -1.46411600 |
| H | 2.53746900  | 2.00552200  | -1.34214600 |
| H | 1.22229400  | 1.09168300  | 1.50146100  |
| H | 2.92861800  | 0.44804400  | 1.13422400  |
| H | 1.20481200  | 3.60807200  | -0.08874200 |
| H | -1.08626500 | 3.33595300  | 0.42516500  |
| H | -2.35682900 | 1.49439700  | 0.54582600  |
| H | -0.29016900 | -1.99949800 | -0.15038000 |
| N | -2.41380400 | -0.85273800 | -0.08972000 |
| O | -2.38613300 | -1.92039300 | -0.67319500 |
| O | -3.42597300 | -0.34494500 | 0.35495300  |
| C | 2.28625800  | -1.79783700 | -0.04063300 |
| H | 1.82070000  | -2.74978400 | -0.36679800 |
| O | 3.48738700  | -1.66118400 | -0.05948500 |

#### 2-CN-4-CH<sub>3</sub>-substituted

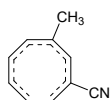

|   |             |             |             |
|---|-------------|-------------|-------------|
| C | 0.11089200  | -1.97264900 | -0.86408200 |
| C | -0.93205500 | -1.06969100 | 0.99182000  |
| C | 1.32845500  | -2.13864000 | -0.26015100 |
| C | 2.19196300  | -1.08408200 | 0.13076700  |
| C | 2.01089700  | 0.28388100  | 0.20542200  |
| C | 0.96161900  | 1.25045300  | 0.00655100  |
| C | -0.41863600 | 1.17523300  | 0.03655500  |
| C | -1.29891000 | 0.11477800  | 0.39940500  |
| H | -0.11768300 | -1.04749200 | -1.37830800 |
| H | -0.49454100 | -2.83503300 | -1.12851200 |
| H | 0.00904700  | -1.12086800 | 1.52131700  |
| H | -1.68384300 | -1.81425300 | 1.23404600  |
| H | 1.64054100  | -3.14438800 | 0.01630000  |
| H | 3.18617400  | -1.40660400 | 0.43592100  |
| H | 2.95107600  | 0.79262400  | 0.42529200  |
| H | -0.93398600 | 2.08785300  | -0.25413000 |
| C | 1.52990000  | 2.64381900  | -0.23733800 |
| H | 0.74364200  | 3.37972100  | -0.41676100 |
| H | 2.10638800  | 2.97590400  | 0.63412100  |
| H | 2.20700400  | 2.64842500  | -1.09776300 |
| C | -2.67605700 | 0.26437800  | -0.01037800 |
| N | -3.78031900 | 0.38274700  | -0.34042200 |

#### 2-CN-4-NH<sub>2</sub>-substituted

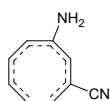

|   |            |             |             |
|---|------------|-------------|-------------|
| C | 0.19122100 | -1.93818900 | -0.85844800 |
|---|------------|-------------|-------------|

|   |             |             |             |
|---|-------------|-------------|-------------|
| C | -0.88755200 | -1.09318000 | 0.99173600  |
| C | 1.42817400  | -2.06520700 | -0.28192500 |
| C | 2.24230300  | -0.98069300 | 0.12871700  |
| C | 2.00764900  | 0.37524500  | 0.23751700  |
| C | 0.92208800  | 1.29619400  | 0.00380400  |
| C | -0.46108800 | 1.16111600  | 0.00121700  |
| C | -1.29212600 | 0.08273200  | 0.40133000  |
| H | -0.07753200 | -1.01764600 | -1.36228000 |
| H | -0.38060900 | -2.82113800 | -1.12996800 |
| H | 0.05185100  | -1.11684800 | 1.52633700  |
| H | -1.61971400 | -1.85654600 | 1.23388500  |
| H | 1.78660200  | -3.05991100 | -0.02410000 |
| H | 3.24250600  | -1.26614500 | 0.45074600  |
| H | 2.90084100  | 0.92972000  | 0.52453500  |
| H | -1.00443800 | 2.04070400  | -0.33817800 |
| N | 1.40561900  | 2.60901300  | -0.16223200 |
| H | 2.20784600  | 2.69919700  | -0.77356400 |
| H | 0.70166900  | 3.30629400  | -0.36776700 |
| C | -2.67585900 | 0.17974900  | -0.00566800 |
| N | -3.78531600 | 0.25609100  | -0.33053000 |

#### 2-CN-4-OH-substituted

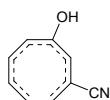

|   |             |             |             |
|---|-------------|-------------|-------------|
| C | 0.24315500  | -1.92364100 | -0.86654800 |
| C | -0.88157400 | -1.08528800 | 1.00101100  |
| C | 1.46892400  | -2.02921300 | -0.26701100 |
| C | 2.26669000  | -0.92992300 | 0.14010400  |
| C | 2.00507000  | 0.42207300  | 0.22557200  |
| C | 0.89120400  | 1.30218700  | -0.00205300 |
| C | -0.48366000 | 1.17504900  | 0.02063200  |
| C | -1.30172800 | 0.07812300  | 0.40265600  |
| H | -0.04195200 | -1.00417100 | -1.36322800 |
| H | -0.31377500 | -2.81468700 | -1.14177300 |
| H | 0.06001600  | -1.09684600 | 1.53217300  |
| H | -1.59815500 | -1.86577900 | 1.23511000  |
| H | 1.83996800  | -3.01714700 | -0.00152100 |
| H | 3.27079900  | -1.19456100 | 0.46683400  |
| H | 2.88840800  | 0.99945800  | 0.50318100  |
| H | -1.00494200 | 2.07396700  | -0.29664300 |
| O | 1.26905500  | 2.61085900  | -0.22690200 |
| H | 2.16754400  | 2.64236400  | -0.58238600 |
| C | -2.68502500 | 0.15240900  | -0.01172200 |
| N | -3.79409800 | 0.20283900  | -0.34176800 |

#### 2-CN-4-F-substituted

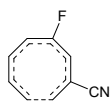

|   |             |             |             |
|---|-------------|-------------|-------------|
| C | 0.30715100  | -1.93357500 | -0.83752600 |
| C | -0.85412000 | -1.07697700 | 1.02236500  |
| C | 1.52814000  | -1.98957200 | -0.22646200 |

|   |             |             |             |
|---|-------------|-------------|-------------|
| C | 2.31704200  | -0.85792300 | 0.11131800  |
| C | 2.01958700  | 0.48639400  | 0.15075100  |
| C | 0.85453700  | 1.29859000  | -0.00683700 |
| C | -0.51124300 | 1.17975300  | 0.03952800  |
| C | -1.30988400 | 0.05789000  | 0.40172800  |
| H | 0.00147700  | -1.03677100 | -1.36312700 |
| H | -0.23461100 | -2.84393300 | -1.07691700 |
| H | 0.08748500  | -1.04714600 | 1.55352900  |
| H | -1.53889800 | -1.88447800 | 1.25970500  |
| H | 1.91823700  | -2.95877100 | 0.07859000  |
| H | 3.34360100  | -1.08356300 | 0.39353000  |
| H | 2.88291400  | 1.12746200  | 0.31962300  |
| H | -1.04073900 | 2.08549100  | -0.24281100 |
| F | 1.24095700  | 2.59107900  | -0.23197300 |
| C | -2.68869900 | 0.09117800  | -0.02807600 |
| N | -3.79473500 | 0.11249300  | -0.37072800 |

#### 2-CN-4-CHO-substituted

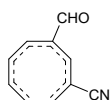

|   |             |             |             |
|---|-------------|-------------|-------------|
| C | 0.89251300  | 2.00124000  | -0.88911600 |
| C | 1.53204900  | 0.74210500  | 0.99726200  |
| C | -0.15092100 | 2.60748000  | -0.24951000 |
| C | -1.36506700 | 1.97091800  | 0.13334500  |
| C | -1.72283400 | 0.64387400  | 0.20876300  |
| C | -1.09125700 | -0.63654700 | 0.03374800  |
| C | 0.20235300  | -1.12263100 | 0.05798800  |
| C | 1.43076400  | -0.48837600 | 0.39672700  |
| H | 0.74887100  | 1.05634300  | -1.39795300 |
| H | 1.78222500  | 2.56519900  | -1.15398300 |
| H | 0.67356800  | 1.14431000  | 1.51710200  |
| H | 2.50554300  | 1.16011700  | 1.23366500  |
| H | -0.04401100 | 3.65123700  | 0.04213400  |
| H | -2.16064300 | 2.65579000  | 0.42167600  |
| H | -2.78433800 | 0.50204800  | 0.40835000  |
| H | 0.30397100  | -2.17134900 | -0.22073200 |
| C | -2.09195900 | -1.74355900 | -0.17341400 |
| H | -1.64689500 | -2.73597800 | -0.38651000 |
| O | -3.29098400 | -1.61566800 | -0.11580100 |
| C | 2.64190500  | -1.15467700 | -0.01995600 |
| N | 3.61204400  | -1.68876300 | -0.35890900 |

#### 2-CN-4-CN-substituted

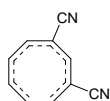

|   |             |             |             |
|---|-------------|-------------|-------------|
| C | 0.86254900  | 1.96454200  | -0.92946400 |
| C | 1.47222100  | 0.71343800  | 0.99525200  |
| C | -0.14294200 | 2.62457200  | -0.28420400 |
| C | -1.37509100 | 2.04778400  | 0.13265400  |
| C | -1.79326600 | 0.74101500  | 0.24069800  |
| C | -1.20952400 | -0.57142900 | 0.07658200  |

|   |             |             |             |
|---|-------------|-------------|-------------|
| C | 0.06303400  | -1.11658800 | 0.08952700  |
| C | 1.31400900  | -0.51524500 | 0.40666700  |
| H | 0.67777300  | 1.01386400  | -1.41387300 |
| H | 1.77042000  | 2.48714500  | -1.21676000 |
| H | 0.63793900  | 1.16325600  | 1.51551900  |
| H | 2.46499400  | 1.09476700  | 1.21201700  |
| H | 0.01099100  | 3.66841600  | -0.01604700 |
| H | -2.13471800 | 2.76971200  | 0.42644500  |
| H | -2.85369500 | 0.66107400  | 0.47243800  |
| H | 0.11439100  | -2.16932000 | -0.17700000 |
| C | -2.23974900 | -1.57866600 | -0.11259300 |
| N | -3.06931800 | -2.37169800 | -0.26480900 |
| C | 2.49583700  | -1.22865100 | -0.01817000 |
| N | 3.44495100  | -1.79595100 | -0.36153800 |

2-CN-4-NO<sub>2</sub>-substituted

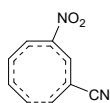

|   |             |             |             |
|---|-------------|-------------|-------------|
| C | 1.63888200  | 1.76639300  | -0.97106000 |
| C | 1.89084200  | 0.46747200  | 1.01158700  |
| C | 0.82712100  | 2.67817200  | -0.36070200 |
| C | -0.51289100 | 2.44586200  | 0.05779300  |
| C | -1.25171600 | 1.29411700  | 0.20818400  |
| C | -1.00261600 | -0.10938000 | 0.08548200  |
| C | 0.06703700  | -0.96918800 | 0.12967800  |
| C | 1.42618700  | -0.69709200 | 0.45669400  |
| H | 1.22637200  | 0.87446900  | -1.42572400 |
| H | 2.65083000  | 2.03438900  | -1.26094900 |
| H | 1.19735700  | 1.13714600  | 1.50127500  |
| H | 2.94654600  | 0.58576000  | 1.23411400  |
| H | 1.23651900  | 3.65899600  | -0.12458000 |
| H | -1.06492800 | 3.34621000  | 0.31934400  |
| H | -2.29433100 | 1.48041900  | 0.44536900  |
| H | -0.16149500 | -1.99924000 | -0.12458700 |
| N | -2.30431400 | -0.87402900 | -0.08668600 |
| O | -2.26346200 | -1.93380200 | -0.68026800 |
| O | -3.31641000 | -0.38675900 | 0.37982600  |
| C | 2.39028600  | -1.70150900 | 0.07135200  |
| N | 3.17050100  | -2.49778900 | -0.24113900 |

2-NO<sub>2</sub>-4-CH<sub>3</sub>-substituted

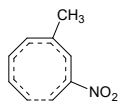

|   |             |             |             |
|---|-------------|-------------|-------------|
| C | 0.45349800  | -1.98383300 | -0.89573800 |
| C | -0.59661800 | -1.12384200 | 0.98230700  |
| C | 1.66735500  | -2.13524500 | -0.28418900 |
| C | 2.51901000  | -1.07296600 | 0.12080200  |
| C | 2.32169100  | 0.28982100  | 0.21624700  |
| C | 1.25937800  | 1.24771100  | 0.03085700  |
| C | -0.11777500 | 1.15554100  | 0.07092700  |
| C | -0.95313700 | 0.06625200  | 0.41917200  |



|   |             |             |             |
|---|-------------|-------------|-------------|
| H | 0.21093100  | -1.05557500 | -1.39855200 |
| H | -0.14325400 | -2.85061600 | -1.16477900 |
| H | 0.34008000  | -1.16792000 | 1.51950800  |
| H | -1.34624100 | -1.88012600 | 1.18229000  |
| H | 1.99101100  | -3.13887300 | -0.01292400 |
| H | 3.51689700  | -1.38848400 | 0.42104700  |
| H | 3.25468200  | 0.80704400  | 0.44664800  |
| H | -0.66127900 | 2.05681200  | -0.19184700 |
| C | 1.80924500  | 2.65020500  | -0.19793200 |
| H | 2.49266400  | 2.67096500  | -1.05311400 |
| H | 1.01249800  | 3.37434900  | -0.37810500 |
| H | 2.37433900  | 2.98448200  | 0.68028100  |
| N | -2.36943700 | 0.18767700  | -0.00994500 |
| O | -2.78277200 | 1.29120200  | -0.32148700 |
| O | -3.04624600 | -0.82716000 | -0.02295700 |

2-NO<sub>2</sub>-4-NH<sub>2</sub>-substituted

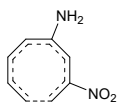

|   |             |             |             |
|---|-------------|-------------|-------------|
| C | 0.52387200  | -1.94194800 | -0.88946300 |
| C | -0.55971300 | -1.13888300 | 0.97694600  |
| C | 1.75686100  | -2.06232800 | -0.30642400 |
| C | 2.56493800  | -0.97587700 | 0.11821500  |
| C | 2.32149200  | 0.37524300  | 0.24689100  |
| C | 1.22711600  | 1.29259900  | 0.03006400  |
| C | -0.15314100 | 1.14897100  | 0.04015200  |
| C | -0.94675300 | 0.04758700  | 0.42068100  |
| H | 0.24716800  | -1.01713400 | -1.38186000 |
| H | -0.04357100 | -2.82558200 | -1.16729000 |
| H | 0.37269800  | -1.16083800 | 1.52309100  |
| H | -1.29294300 | -1.91165500 | 1.17228100  |
| H | 2.12164200  | -3.05666300 | -0.05569200 |
| H | 3.56739000  | -1.25957500 | 0.43454100  |
| H | 3.21095700  | 0.93192600  | 0.54118200  |
| H | -0.72038800 | 2.02343700  | -0.26196900 |
| N | 1.69976900  | 2.61015500  | -0.12016700 |
| H | 2.50306400  | 2.71488800  | -0.72767600 |
| H | 0.98931400  | 3.30273900  | -0.31964000 |
| N | -2.36969100 | 0.13117500  | -0.00758100 |
| O | -2.81202200 | 1.22346200  | -0.32070300 |
| O | -3.02221700 | -0.89884100 | -0.01493500 |

2-NO<sub>2</sub>-4-OH-substituted

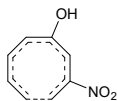

|   |             |             |             |
|---|-------------|-------------|-------------|
| C | 0.57075500  | -1.92498000 | -0.89827600 |
| C | -0.55463800 | -1.13059200 | 0.98501900  |
| C | 1.79342000  | -2.02700300 | -0.29420400 |
| C | 2.58670400  | -0.92779200 | 0.12748600  |
| C | 2.31888400  | 0.42023000  | 0.23557900  |
| C | 1.19906500  | 1.29948900  | 0.02606700  |
| C | -0.17316700 | 1.16409000  | 0.05989500  |

|   |             |             |             |
|---|-------------|-------------|-------------|
| C | -0.95403000 | 0.04602900  | 0.42251000  |
| H | 0.27948200  | -1.00115800 | -1.38384600 |
| H | 0.01685700  | -2.81568700 | -1.18020900 |
| H | 0.37961100  | -1.14512300 | 1.52822500  |
| H | -1.27578400 | -1.91708700 | 1.17134200  |
| H | 2.16944600  | -3.01544000 | -0.03730200 |
| H | 3.59279700  | -1.19271400 | 0.44766800  |
| H | 3.19995300  | 0.99722600  | 0.52102200  |
| H | -0.71805400 | 2.05791700  | -0.22285500 |
| O | 1.56931000  | 2.61242600  | -0.17880000 |
| H | 2.46780400  | 2.65558600  | -0.53297100 |
| N | -2.37725500 | 0.11244200  | -0.01189200 |
| O | -3.01694900 | -0.92576700 | -0.01450500 |
| O | -2.82652200 | 1.19741100  | -0.33323100 |

2-NO<sub>2</sub>-4-F-substituted

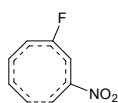

|   |             |             |             |
|---|-------------|-------------|-------------|
| C | 0.60739900  | -1.93022300 | -0.87689100 |
| C | -0.53920300 | -1.11575600 | 1.00665800  |
| C | 1.82616900  | -1.99809800 | -0.26450600 |
| C | 2.62441300  | -0.87617000 | 0.09011800  |
| C | 2.33698200  | 0.46802800  | 0.16064000  |
| C | 1.17567400  | 1.29258400  | 0.03020200  |
| C | -0.18831200 | 1.17885600  | 0.08928700  |
| C | -0.95952000 | 0.04228400  | 0.42699900  |
| H | 0.30430100  | -1.02402400 | -1.38828000 |
| H | 0.05902900  | -2.83400300 | -1.12558400 |
| H | 0.39421400  | -1.10723000 | 1.55203700  |
| H | -1.24144600 | -1.92006200 | 1.19064000  |
| H | 2.21112800  | -2.97352800 | 0.02735500  |
| H | 3.65123400  | -1.11458000 | 0.36049300  |
| H | 3.20598600  | 1.09890900  | 0.33853000  |
| H | -0.73277100 | 2.08447800  | -0.15524300 |
| F | 1.56926200  | 2.58597300  | -0.16607800 |
| N | -2.37509700 | 0.08313800  | -0.02473500 |
| O | -2.81997100 | 1.15137000  | -0.40346600 |
| O | -3.01140000 | -0.95570900 | 0.01507200  |

2-NO<sub>2</sub>-4-CHO-substituted

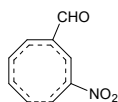

|   |             |             |             |
|---|-------------|-------------|-------------|
| C | 0.38174800  | 2.16636400  | -0.92244700 |
| C | 1.14764200  | 1.00742300  | 0.99274100  |
| C | -0.71172600 | 2.66310800  | -0.27516900 |
| C | -1.85696600 | 1.91026600  | 0.11909000  |
| C | -2.08102100 | 0.55679900  | 0.21311100  |
| C | -1.32481500 | -0.65778900 | 0.04985700  |
| C | 0.00917800  | -1.00983800 | 0.08579900  |
| C | 1.14042300  | -0.22814900 | 0.41820200  |
| H | 0.33444300  | 1.20623700  | -1.42182400 |
| H | 1.21193900  | 2.81318800  | -1.19087200 |
| H | 0.25929800  | 1.32887100  | 1.51790100  |

|   |             |             |             |
|---|-------------|-------------|-------------|
| H | 2.08484600  | 1.51434200  | 1.19156300  |
| H | -0.70860400 | 3.71332500  | 0.01318200  |
| H | -2.71581800 | 2.51654000  | 0.40132400  |
| H | -3.12192600 | 0.31226800  | 0.42141500  |
| H | 0.23671700  | -2.04174900 | -0.17102200 |
| C | -2.20762700 | -1.86237600 | -0.14523700 |
| H | -1.66385000 | -2.80426100 | -0.35741600 |
| O | -3.41299700 | -1.85586800 | -0.07873600 |
| N | 2.45143300  | -0.76957300 | -0.01536600 |
| O | 2.50150300  | -1.94003900 | -0.34952000 |
| O | 3.40423200  | -0.00991800 | -0.01079200 |

2-NO<sub>2</sub>-4-CN-substituted

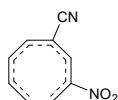

|   |             |             |             |
|---|-------------|-------------|-------------|
| C | 0.27932300  | 2.15133600  | -0.95291900 |
| C | 1.05734100  | 1.02901500  | 0.99272700  |
| C | -0.80571400 | 2.66155200  | -0.30297900 |
| C | -1.94599400 | 1.91755700  | 0.11799900  |
| C | -2.17626700 | 0.56738000  | 0.24091100  |
| C | -1.41356900 | -0.65398900 | 0.09280600  |
| C | -0.07815200 | -1.01075900 | 0.12000800  |
| C | 1.04638300  | -0.21035300 | 0.42975000  |
| H | 0.22800700  | 1.18054100  | -1.43095500 |
| H | 1.10830700  | 2.79128700  | -1.24063100 |
| H | 0.17403000  | 1.35951300  | 1.52096300  |
| H | 1.99613900  | 1.54011500  | 1.17224300  |
| H | -0.80004900 | 3.71665300  | -0.03445600 |
| H | -2.80053700 | 2.52796500  | 0.40307500  |
| H | -3.21481500 | 0.34201200  | 0.47568000  |
| H | 0.14531700  | -2.04456400 | -0.12334500 |
| C | -2.29260500 | -1.79743100 | -0.08466800 |
| N | -3.00829500 | -2.69634000 | -0.22560900 |
| N | 2.35712200  | -0.74897100 | -0.01688500 |
| O | 3.30284200  | 0.01898700  | -0.03363300 |
| O | 2.40932600  | -1.92176000 | -0.33723300 |

2-NO<sub>2</sub>-4-NO<sub>2</sub>-substituted

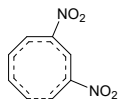

|   |             |             |             |
|---|-------------|-------------|-------------|
| C | 0.99793200  | 2.18058700  | -0.96188900 |
| C | 1.54700100  | 0.92184400  | 0.98532600  |
| C | 0.05990400  | 2.90405700  | -0.28640200 |
| C | -1.20425300 | 2.42302800  | 0.16438000  |
| C | -1.72735900 | 1.15772000  | 0.28685500  |
| C | -1.23691600 | -0.18028500 | 0.13101100  |
| C | -0.02707600 | -0.82514900 | 0.15047000  |
| C | 1.24877800  | -0.28612200 | 0.43310700  |
| H | 0.73893000  | 1.24227500  | -1.43740900 |
| H | 1.93542400  | 2.63597200  | -1.26795500 |
| H | 0.77147400  | 1.44538900  | 1.52595300  |
| H | 2.57962900  | 1.21116600  | 1.14304200  |
| H | 0.29762600  | 3.93260200  | -0.01969300 |

|   |             |             |             |
|---|-------------|-------------|-------------|
| H | -1.89267300 | 3.20468000  | 0.47910500  |
| H | -2.78246400 | 1.15787700  | 0.53987200  |
| H | -0.04926900 | -1.88344200 | -0.08414500 |
| N | -2.38451700 | -1.15743500 | -0.06181000 |
| O | -2.14924500 | -2.34697100 | 0.02316400  |
| O | -3.48368700 | -0.69392600 | -0.30443700 |
| N | 2.39981300  | -1.10334600 | -0.03501400 |
| O | 2.18485400  | -2.25805600 | -0.35007200 |
| O | 3.49135200  | -0.56294000 | -0.07092500 |

### 5.3.11 2,5-substituted

#### 2-CH<sub>3</sub>-5-CH<sub>3</sub>-substituted

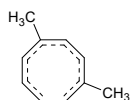

|   |             |             |             |
|---|-------------|-------------|-------------|
| C | 0.47946100  | 1.81018100  | -0.72194500 |
| C | 1.39798200  | 0.64614600  | 1.00966800  |
| C | -0.75801200 | 2.00369100  | -0.15977200 |
| C | -1.72479100 | 0.99933200  | 0.07641500  |
| C | -1.67464500 | -0.38712400 | -0.00599400 |
| C | -0.61429900 | -1.32544400 | -0.24577900 |
| C | 0.76780900  | -1.38791700 | -0.17383300 |
| C | 1.74615700  | -0.47185600 | 0.29194600  |
| H | 0.65819200  | 0.94507700  | -1.34783400 |
| H | 1.14904600  | 2.65396500  | -0.86636300 |
| H | 0.44049300  | 0.68115700  | 1.51292700  |
| H | 2.16452400  | 1.32385600  | 1.37849600  |
| H | -1.00263300 | 2.99564600  | 0.21795900  |
| H | -2.69539100 | 1.38983400  | 0.37879900  |
| H | -1.02987400 | -2.29458100 | -0.53025600 |
| H | 1.17631700  | -2.32327700 | -0.55875700 |
| C | 3.16921100  | -0.67737800 | -0.17069100 |
| H | 3.87181400  | -0.07513400 | 0.41145800  |
| H | 3.46261600  | -1.72877700 | -0.07859600 |
| H | 3.28246600  | -0.40279200 | -1.22790100 |
| C | -3.01918900 | -1.09452600 | 0.13577500  |
| H | -3.82869500 | -0.39211100 | 0.34675100  |
| H | -3.27181800 | -1.62467600 | -0.79054100 |
| H | -2.99515800 | -1.83881600 | 0.93912600  |

#### 2-CH<sub>3</sub>-5-NH<sub>2</sub>-substituted

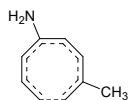

|   |             |             |             |
|---|-------------|-------------|-------------|
| C | 0.40730500  | 1.82339400  | -0.73067600 |
| C | 1.35478600  | 0.67949100  | 0.99858000  |
| C | -0.83877300 | 1.96935900  | -0.16890300 |
| C | -1.76353500 | 0.94081600  | 0.10318300  |
| C | -1.67157600 | -0.44580600 | -0.00829000 |
| C | -0.58756100 | -1.34793400 | -0.28867200 |
| C | 0.79212000  | -1.37190100 | -0.18683800 |
| C | 1.74256900  | -0.43884200 | 0.30019200  |
| H | 0.62201200  | 0.96758300  | -1.35802000 |
| H | 1.03882600  | 2.69563700  | -0.87528000 |

|   |             |             |             |
|---|-------------|-------------|-------------|
| H | 0.39127000  | 0.69307000  | 1.49194100  |
| H | 2.10066200  | 1.37611700  | 1.37464600  |
| H | -1.11493200 | 2.95288800  | 0.20958500  |
| H | -2.73374700 | 1.29274500  | 0.45310100  |
| H | -0.98776900 | -2.29880600 | -0.64158600 |
| H | 1.22848800  | -2.28559800 | -0.59271700 |
| C | 3.17666400  | -0.61224000 | -0.14230100 |
| H | 3.85869100  | -0.01052600 | 0.46446500  |
| H | 3.48736300  | -1.65999300 | -0.06651400 |
| H | 3.30526800  | -0.31282200 | -1.19119600 |
| N | -2.89995200 | -1.14828000 | 0.07303800  |
| H | -3.69740000 | -0.57152200 | 0.31003900  |
| H | -2.87106100 | -1.97883100 | 0.65262600  |

#### 2-CH<sub>3</sub>-5-OH-substituted

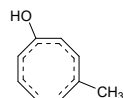

|   |             |             |             |
|---|-------------|-------------|-------------|
| C | 0.35454800  | 1.83147700  | -0.72966300 |
| C | 1.34461700  | 0.69086400  | 1.00008800  |
| C | -0.88681300 | 1.94963700  | -0.15699600 |
| C | -1.79359600 | 0.89707200  | 0.09334600  |
| C | -1.65325200 | -0.48102400 | 0.00132700  |
| C | -0.57070700 | -1.38764100 | -0.23292400 |
| C | 0.80945100  | -1.37962200 | -0.16241000 |
| C | 1.74497100  | -0.41233100 | 0.28814000  |
| H | 0.58402600  | 0.98095100  | -1.35903600 |
| H | 0.97324100  | 2.71371100  | -0.86765600 |
| H | 0.38686400  | 0.68353800  | 1.50500800  |
| H | 2.07830000  | 1.40702500  | 1.36258300  |
| H | -1.18288700 | 2.92272600  | 0.23236000  |
| H | -2.78061000 | 1.21974500  | 0.42708400  |
| H | -0.97869000 | -2.35938800 | -0.50634300 |
| H | 1.25808000  | -2.29825200 | -0.54219500 |
| C | 3.17416900  | -0.55397700 | -0.17942700 |
| H | 3.85018400  | 0.07983900  | 0.40061600  |
| H | 3.51565000  | -1.59071900 | -0.08714100 |
| H | 3.27277900  | -0.27489700 | -1.23691500 |
| O | -2.81643400 | -1.22111100 | 0.13656200  |
| H | -3.58579700 | -0.64212300 | 0.05024900  |

#### 2-CH<sub>3</sub>-5-F-substituted

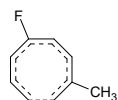

|   |             |             |             |
|---|-------------|-------------|-------------|
| C | 0.30397100  | 1.84967700  | -0.71490900 |
| C | 1.32750500  | 0.68654800  | 1.01404400  |
| C | -0.93707700 | 1.94946100  | -0.14291400 |
| C | -1.82979700 | 0.87454000  | 0.07089600  |
| C | -1.62182300 | -0.48476400 | -0.00360000 |
| C | -0.55764600 | -1.40756600 | -0.21264000 |
| C | 0.82181100  | -1.38631200 | -0.15969700 |
| C | 1.74035800  | -0.39493000 | 0.27976600  |
| H | 0.54482200  | 1.00446000  | -1.34744500 |
| H | 0.92132500  | 2.73516000  | -0.83708600 |

|   |             |             |             |
|---|-------------|-------------|-------------|
| H | 0.37040600  | 0.66144800  | 1.51984500  |
| H | 2.04883700  | 1.41522600  | 1.37554200  |
| H | -1.25260100 | 2.91320100  | 0.25274700  |
| H | -2.84833000 | 1.13128200  | 0.35203500  |
| H | -0.97239400 | -2.38282500 | -0.46266200 |
| H | 1.28146400  | -2.30262400 | -0.53066200 |
| C | 3.16715800  | -0.50616300 | -0.20211000 |
| H | 3.83068600  | 0.16177700  | 0.35323200  |
| H | 3.53977900  | -1.52983700 | -0.08746300 |
| H | 3.24359300  | -0.25238600 | -1.26739700 |
| F | -2.79937200 | -1.18198000 | 0.12292300  |

2-CH<sub>3</sub>-5-CHO-substituted

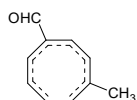

|   |             |             |             |
|---|-------------|-------------|-------------|
| C | 0.84141000  | 1.83273200  | -0.73918700 |
| C | 1.70973900  | 0.58108600  | 1.07339500  |
| C | -0.39121500 | 2.05977800  | -0.18678900 |
| C | -1.38781300 | 1.07633100  | 0.00001200  |
| C | -1.34595000 | -0.30759500 | -0.09782300 |
| C | -0.32450500 | -1.29815300 | -0.30228900 |
| C | 1.04513100  | -1.40526900 | -0.18619700 |
| C | 2.03557900  | -0.50822400 | 0.31416100  |
| H | 1.01481400  | 0.94961900  | -1.34072800 |
| H | 1.55134400  | 2.64683200  | -0.85728200 |
| H | 0.73150900  | 0.65546100  | 1.52986900  |
| H | 2.48475900  | 1.23323600  | 1.46856200  |
| H | -0.61870700 | 3.05583500  | 0.18866500  |
| H | -2.37514000 | 1.45136000  | 0.26669400  |
| H | -0.76939900 | -2.24759700 | -0.60700000 |
| H | 1.44206100  | -2.35255000 | -0.55226600 |
| C | 3.46135900  | -0.75092500 | -0.11938700 |
| H | 4.16013900  | -0.10852600 | 0.42235300  |
| H | 3.74806500  | -1.79348300 | 0.05761400  |
| H | 3.58311100  | -0.56113500 | -1.19331000 |
| C | -2.70628700 | -0.94074600 | -0.00066200 |
| H | -2.72871900 | -2.02999300 | -0.21113700 |
| O | -3.73106800 | -0.36664300 | 0.28707000  |

2-CH<sub>3</sub>-5-CN-substituted

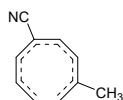

|   |             |             |             |
|---|-------------|-------------|-------------|
| C | 0.91401500  | 1.80759100  | -0.71862300 |
| C | 1.68601600  | 0.49246100  | 1.05503600  |
| C | -0.28138200 | 2.15299000  | -0.14480400 |
| C | -1.36694200 | 1.27214900  | 0.05485800  |
| C | -1.44720900 | -0.11374200 | -0.04749700 |
| C | -0.53172400 | -1.20599000 | -0.27218800 |
| C | 0.82584700  | -1.42733300 | -0.18354300 |
| C | 1.90185200  | -0.62380300 | 0.29328600  |
| H | 0.98121000  | 0.92410800  | -1.34062500 |
| H | 1.69756400  | 2.54951800  | -0.84357700 |
| H | 0.73088900  | 0.64075800  | 1.54180800  |

|   |             |             |             |
|---|-------------|-------------|-------------|
| H | 2.52287400  | 1.07326600  | 1.43532900  |
| H | -0.40300900 | 3.16032700  | 0.24797900  |
| H | -2.30174100 | 1.75019700  | 0.33992000  |
| H | -1.07485000 | -2.10334100 | -0.56394700 |
| H | 1.12727100  | -2.40507700 | -0.55982100 |
| C | 3.29083000  | -0.99054300 | -0.17014300 |
| H | 4.05534700  | -0.41766600 | 0.36040900  |
| H | 3.48536800  | -2.05567900 | -0.00356800 |
| H | 3.40852600  | -0.80589100 | -1.24541200 |
| C | -2.81322800 | -0.59601200 | 0.06237900  |
| N | -3.89970000 | -0.98816000 | 0.15127700  |

2-CH<sub>3</sub>-5-NO<sub>2</sub>-substituted

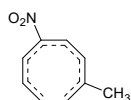

|   |             |             |             |
|---|-------------|-------------|-------------|
| C | 1.35019900  | 1.76568700  | -0.83776900 |
| C | 2.04735700  | 0.54469100  | 1.03963700  |
| C | 0.16336100  | 2.19414500  | -0.30479100 |
| C | -0.96255700 | 1.37962100  | -0.05165600 |
| C | -1.08538700 | 0.00461900  | -0.06569200 |
| C | -0.24112900 | -1.13742600 | -0.21560600 |
| C | 1.10430400  | -1.40881200 | -0.08727700 |
| C | 2.21234200  | -0.62677500 | 0.35186900  |
| H | 1.39578200  | 0.84089000  | -1.39860400 |
| H | 2.16114000  | 2.47035800  | -0.99946400 |
| H | 1.09825100  | 0.77507400  | 1.50568400  |
| H | 2.91024900  | 1.10665500  | 1.38870600  |
| H | 0.07962800  | 3.23027400  | 0.01605900  |
| H | -1.87589400 | 1.90471500  | 0.20744100  |
| H | -0.82528700 | -2.01438800 | -0.47483600 |
| H | 1.36571800  | -2.42054700 | -0.39709700 |
| C | 3.58551800  | -1.08614300 | -0.07509300 |
| H | 3.72241800  | -2.15116400 | 0.14121700  |
| H | 3.72277500  | -0.95702100 | -1.15625900 |
| H | 4.37350900  | -0.52955800 | 0.43795400  |
| N | -2.53751300 | -0.41416800 | 0.06239700  |
| O | -3.29978500 | 0.33692800  | 0.64368500  |
| O | -2.87643300 | -1.47864800 | -0.42234900 |

2- NH<sub>2</sub>-5-CH<sub>3</sub>-substituted

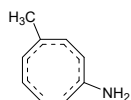

|   |             |             |             |
|---|-------------|-------------|-------------|
| C | 0.48378200  | 1.81935600  | -0.73236700 |
| C | 1.46023400  | 0.64039000  | 1.00072100  |
| C | -0.74555300 | 2.01634300  | -0.16070300 |
| C | -1.71262200 | 1.00870700  | 0.07677000  |
| C | -1.66514300 | -0.37454900 | -0.00555800 |
| C | -0.60452300 | -1.31757900 | -0.25043800 |
| C | 0.77030800  | -1.40259400 | -0.17020800 |
| C | 1.76393800  | -0.48176600 | 0.27154100  |
| H | 0.65880800  | 0.95255400  | -1.35750100 |
| H | 1.16075800  | 2.65753800  | -0.87546100 |
| H | 0.52272600  | 0.67726900  | 1.53831700  |

|   |             |             |             |
|---|-------------|-------------|-------------|
| H | 2.24725800  | 1.31083300  | 1.33876900  |
| H | -0.98477300 | 3.00625400  | 0.22486400  |
| H | -2.68291800 | 1.39914600  | 0.38130900  |
| H | -1.02665500 | -2.28498800 | -0.53099300 |
| H | 1.17890400  | -2.35215400 | -0.51563800 |
| N | 3.08119000  | -0.76711200 | -0.12675000 |
| H | 3.76020100  | -0.06219000 | 0.13226500  |
| H | 3.18763000  | -1.03911700 | -1.09725800 |
| C | -3.00602900 | -1.08565300 | 0.15195600  |
| H | -3.81603000 | -0.38323100 | 0.36152200  |
| H | -3.26505500 | -1.62664400 | -0.76650400 |
| H | -2.97552900 | -1.82141800 | 0.96327700  |

### 2- NH<sub>2</sub>-5-NH<sub>2</sub>-substituted

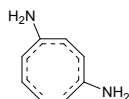

|   |             |             |             |
|---|-------------|-------------|-------------|
| C | 0.86703200  | -1.43070100 | -0.78356000 |
| C | -0.86703200 | -1.43070000 | 0.78356100  |
| C | 1.79721400  | -0.69875900 | -0.07235500 |
| C | 1.72534900  | 0.67464100  | 0.24671800  |
| C | 0.69526600  | 1.61135500  | 0.14928300  |
| C | -0.69526700 | 1.61135500  | -0.14928300 |
| C | -1.72534900 | 0.67464000  | -0.24671900 |
| C | -1.79721400 | -0.69875900 | 0.07235500  |
| H | 0.17248900  | -0.93671800 | -1.44663400 |
| H | 1.04703800  | -2.48370300 | -0.98023800 |
| H | -0.17248900 | -0.93671700 | 1.44663500  |
| H | -1.04703800 | -2.48370300 | 0.98023900  |
| H | 2.65368700  | -1.23319000 | 0.33812400  |
| H | 2.65132500  | 1.08930500  | 0.64370700  |
| H | -1.05171800 | 2.62509500  | -0.33428900 |
| H | -2.65132500 | 1.08930400  | -0.64370900 |
| N | -2.95249005 | -1.41964026 | -0.48133035 |
| H | -2.80993343 | -2.20461004 | -1.08424001 |
| H | -3.88094874 | -1.12506589 | -0.25507740 |
| N | 1.17581171  | 2.97801803  | 0.39869826  |
| H | 2.05072198  | 2.94079948  | 0.88155102  |
| H | 0.50757158  | 3.46961864  | 0.95707446  |

### 2- NH<sub>2</sub>-5-OH-substituted

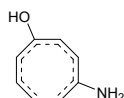

|   |             |             |             |
|---|-------------|-------------|-------------|
| C | 0.36260300  | 1.83783100  | -0.73597500 |
| C | 1.40551800  | 0.69170800  | 0.98505500  |
| C | -0.87170300 | 1.96221100  | -0.15451000 |
| C | -1.78002400 | 0.90738100  | 0.09377900  |
| C | -1.64324400 | -0.46780800 | 0.00252700  |
| C | -0.56228500 | -1.38239500 | -0.22456700 |
| C | 0.81317800  | -1.39783300 | -0.14824900 |
| C | 1.76222200  | -0.42161400 | 0.26650400  |
| H | 0.58351500  | 0.98787000  | -1.36985800 |
| H | 0.99000700  | 2.71422700  | -0.87271100 |
| H | 0.47266200  | 0.68460000  | 1.53278600  |



|   |             |             |             |
|---|-------------|-------------|-------------|
| H | 2.15984800  | 1.40400300  | 1.31163300  |
| H | -1.16046600 | 2.93353300  | 0.24379400  |
| H | -2.76806600 | 1.23074100  | 0.42475200  |
| H | -0.97818000 | -2.35567700 | -0.48005100 |
| H | 1.26235000  | -2.33282200 | -0.48196400 |
| N | 3.08983800  | -0.64571800 | -0.14323600 |
| H | 3.73488600  | 0.09114900  | 0.11402800  |
| H | 3.19878100  | -0.89828300 | -1.11891800 |
| O | -2.80808400 | -1.21047400 | 0.14274200  |
| H | -3.57712500 | -0.63240800 | 0.04983800  |

#### 2- NH<sub>2</sub>-5-F-substituted

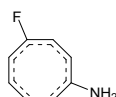

|   |             |             |             |
|---|-------------|-------------|-------------|
| C | 0.30612300  | 1.86238800  | -0.72224000 |
| C | 1.38902400  | 0.68485500  | 1.00668000  |
| C | -0.92750700 | 1.96207000  | -0.14137900 |
| C | -1.81846600 | 0.88157300  | 0.07055300  |
| C | -1.61072600 | -0.47441600 | -0.00288700 |
| C | -0.54568700 | -1.40295300 | -0.20834300 |
| C | 0.82832600  | -1.40296600 | -0.14866800 |
| C | 1.75964200  | -0.40142300 | 0.25883900  |
| H | 0.54606500  | 1.01667800  | -1.35499400 |
| H | 0.92919800  | 2.74443700  | -0.84094200 |
| H | 0.45436200  | 0.65724800  | 1.55071100  |
| H | 2.12831100  | 1.41138000  | 1.33524200  |
| H | -1.24045900 | 2.92280000  | 0.26274400  |
| H | -2.83855800 | 1.13597000  | 0.34921400  |
| H | -0.96654100 | -2.37924400 | -0.44356100 |
| H | 1.29083700  | -2.33416600 | -0.47332800 |
| N | 3.08366000  | -0.59175200 | -0.16929400 |
| H | 3.71863600  | 0.15637900  | 0.07979300  |
| H | 3.18890000  | -0.85383100 | -1.14250800 |
| F | -2.78674800 | -1.17668400 | 0.13192900  |

#### 2- NH<sub>2</sub>-5-CHO-substituted

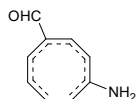

|   |             |             |             |
|---|-------------|-------------|-------------|
| C | 0.84686000  | 1.86558200  | -0.75917500 |
| C | 1.75504000  | 0.52620000  | 1.13088800  |
| C | -0.37790600 | 2.07450600  | -0.20149100 |
| C | -1.37364700 | 1.07981200  | -0.01322300 |
| C | -1.33501400 | -0.29880500 | -0.10500200 |
| C | -0.30934800 | -1.29122100 | -0.33409300 |
| C | 1.04859500  | -1.41142800 | -0.21119200 |
| C | 2.05167000  | -0.51708800 | 0.30686600  |
| H | 1.06235400  | 0.96968000  | -1.32696000 |
| H | 1.55763200  | 2.68133800  | -0.85923400 |
| H | 0.77366400  | 0.59505700  | 1.57810400  |
| H | 2.53511400  | 1.17530200  | 1.51951900  |
| H | -0.61758500 | 3.06742800  | 0.17420700  |
| H | -2.36196400 | 1.45446900  | 0.25195300  |
| H | -0.75767400 | -2.23218100 | -0.65926300 |

|   |             |             |             |
|---|-------------|-------------|-------------|
| H | 1.44372700  | -2.36202200 | -0.57076200 |
| N | 3.35138400  | -0.70168200 | -0.18158500 |
| H | 4.09447900  | -0.46533400 | 0.46387000  |
| H | 3.52122300  | -1.58787100 | -0.63965300 |
| C | -2.68903600 | -0.93474400 | 0.01691100  |
| H | -2.71141300 | -2.02509300 | -0.18974000 |
| O | -3.71281600 | -0.36448600 | 0.31826500  |

2-NH<sub>2</sub>-5-CN-substituted

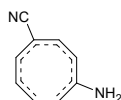

|   |             |             |             |
|---|-------------|-------------|-------------|
| C | 0.93277500  | 1.83401000  | -0.73238600 |
| C | 1.72956600  | 0.42546200  | 1.11047800  |
| C | -0.25538100 | 2.16946100  | -0.15592500 |
| C | -1.34717500 | 1.28389700  | 0.04169900  |
| C | -1.43643200 | -0.09529700 | -0.05617800 |
| C | -0.52305200 | -1.19503300 | -0.30745100 |
| C | 0.82027900  | -1.43710600 | -0.21076400 |
| C | 1.91356200  | -0.64377200 | 0.28446800  |
| H | 1.03338000  | 0.93409800  | -1.32567300 |
| H | 1.72518000  | 2.56983500  | -0.83564300 |
| H | 0.77220100  | 0.57081100  | 1.59045100  |
| H | 2.57426300  | 0.99821100  | 1.48390000  |
| H | -0.38194100 | 3.17464500  | 0.24030400  |
| H | -2.28076900 | 1.76666700  | 0.32394100  |
| H | -1.07424000 | -2.07973800 | -0.62206000 |
| H | 1.11451700  | -2.41858700 | -0.58293200 |
| N | 3.17811700  | -0.94539900 | -0.23176000 |
| H | 3.95613500  | -0.78332100 | 0.39498000  |
| H | 3.25584100  | -1.83505900 | -0.70742500 |
| C | -2.79775600 | -0.57953600 | 0.08076900  |
| N | -3.87995900 | -0.97889900 | 0.19060200  |

2-NH<sub>2</sub>-5-NO<sub>2</sub>-substituted

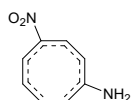

|   |             |             |             |
|---|-------------|-------------|-------------|
| C | 1.36246400  | 1.86613400  | -0.69654800 |
| C | 2.07007900  | 0.38665100  | 1.13878700  |
| C | 0.17593300  | 2.23092400  | -0.13555000 |
| C | -0.95522100 | 1.38807600  | 0.02323300  |
| C | -1.08212500 | 0.02436500  | -0.09170400 |
| C | -0.22794900 | -1.10187100 | -0.36662000 |
| C | 1.10456700  | -1.38901400 | -0.26641400 |
| C | 2.22120700  | -0.65915500 | 0.27736300  |
| H | 1.44517000  | 0.97684300  | -1.30798300 |
| H | 2.18185200  | 2.57607900  | -0.76604500 |
| H | 1.11136800  | 0.56113400  | 1.60613600  |
| H | 2.93217300  | 0.90809200  | 1.54589800  |
| H | 0.07973200  | 3.22946300  | 0.28457700  |
| H | -1.87595000 | 1.89188000  | 0.29949800  |
| H | -0.80818000 | -1.94844700 | -0.71954300 |
| H | 1.37110900  | -2.36046400 | -0.68286600 |

|   |             |             |             |
|---|-------------|-------------|-------------|
| N | 3.47820800  | -0.99635200 | -0.23144500 |
| H | 4.25628500  | -0.87533700 | 0.40425900  |
| H | 3.52926900  | -1.87477800 | -0.73076400 |
| N | -2.51456800 | -0.42451900 | 0.05921100  |
| O | -3.39938500 | 0.41375800  | 0.02654000  |
| O | -2.72337000 | -1.61563600 | 0.22060800  |

2-OH-5-CH<sub>3</sub>-substituted

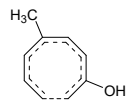

|   |             |             |             |
|---|-------------|-------------|-------------|
| C | 0.51291900  | 1.81560900  | -0.73576200 |
| C | 1.48189100  | 0.63454500  | 0.96676400  |
| C | -0.71507800 | 2.01755400  | -0.15572700 |
| C | -1.68335100 | 1.01855600  | 0.09662200  |
| C | -1.65470900 | -0.36783400 | 0.00454400  |
| C | -0.61255500 | -1.31674500 | -0.26983300 |
| C | 0.76523900  | -1.40672600 | -0.21766700 |
| C | 1.74932200  | -0.50367300 | 0.25062800  |
| H | 0.68023200  | 0.95503000  | -1.37121200 |
| H | 1.18552400  | 2.65592500  | -0.88725600 |
| H | 0.54914500  | 0.69174600  | 1.50930600  |
| H | 2.28926800  | 1.27955000  | 1.30715000  |
| H | -0.94711000 | 3.01002600  | 0.22778100  |
| H | -2.64376700 | 1.41679600  | 0.42135600  |
| H | -1.04530200 | -2.27602500 | -0.56101300 |
| H | 1.18291500  | -2.33205300 | -0.60906900 |
| O | 3.01239100  | -0.79346600 | -0.20627200 |
| H | 3.66503800  | -0.29192800 | 0.30176800  |
| C | -3.00362000 | -1.06099000 | 0.17380100  |
| H | -3.80075900 | -0.34949100 | 0.40097900  |
| H | -3.28197700 | -1.58826200 | -0.74681000 |
| H | -2.97267600 | -1.80536200 | 0.97698400  |

2-OH-5-NH<sub>2</sub>-substituted

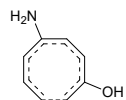

|   |             |             |             |
|---|-------------|-------------|-------------|
| C | 0.43593600  | 1.83849600  | -0.76322300 |
| C | 1.44517700  | 0.66615200  | 0.96167500  |
| C | -0.79218500 | 1.98397400  | -0.16546300 |
| C | -1.71236200 | 0.95944100  | 0.13699400  |
| C | -1.65155000 | -0.42776900 | 0.01616900  |
| C | -0.59059400 | -1.34337400 | -0.29915200 |
| C | 0.78800500  | -1.38930700 | -0.22846100 |
| C | 1.74618800  | -0.46906500 | 0.25653800  |
| H | 0.64711400  | 0.98118000  | -1.38966800 |
| H | 1.06474100  | 2.71055500  | -0.92113900 |
| H | 0.50122600  | 0.71134200  | 1.48618000  |
| H | 2.23393500  | 1.33072700  | 1.30783000  |
| H | -1.05578600 | 2.96836300  | 0.21924000  |
| H | -2.66509500 | 1.30852300  | 0.53394900  |
| H | -0.99485400 | -2.29628800 | -0.64294500 |
| H | 1.23349500  | -2.29060600 | -0.64468100 |
| O | 3.02234300  | -0.73481800 | -0.18832800 |

|   |             |             |             |
|---|-------------|-------------|-------------|
| H | 3.65890000  | -0.22480600 | 0.33114900  |
| N | -2.89116100 | -1.07298100 | 0.25856100  |
| H | -3.68922400 | -0.64591500 | -0.19530300 |
| H | -2.88675000 | -2.07494200 | 0.12162000  |

2-OH-5-OH-substituted

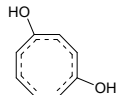

|   |             |             |             |
|---|-------------|-------------|-------------|
| C | 0.38776800  | 1.83608700  | -0.74247000 |
| C | 1.42447700  | 0.68754300  | 0.95465400  |
| C | -0.84523200 | 1.96373100  | -0.15279300 |
| C | -1.75259800 | 0.91567800  | 0.11364100  |
| C | -1.63278400 | -0.46342100 | 0.01326100  |
| C | -0.56794000 | -1.38199000 | -0.24925500 |
| C | 0.81018400  | -1.39917500 | -0.20052200 |
| C | 1.74933500  | -0.44068200 | 0.24751500  |
| H | 0.60397200  | 0.99017700  | -1.38296500 |
| H | 1.00883700  | 2.71548000  | -0.88912900 |
| H | 0.49248600  | 0.69930300  | 1.50228600  |
| H | 2.19752600  | 1.37727600  | 1.28647700  |
| H | -1.12921800 | 2.93808900  | 0.24162900  |
| H | -2.73066400 | 1.24590900  | 0.46645400  |
| H | -0.99229500 | -2.34676700 | -0.52169500 |
| H | 1.26894200  | -2.30708100 | -0.58620700 |
| O | 3.02223500  | -0.66798800 | -0.21992700 |
| H | 3.65430300  | -0.13729600 | 0.28438400  |
| O | -2.80291000 | -1.19133900 | 0.17151000  |
| H | -3.56774700 | -0.60709500 | 0.08192500  |

2-OH-5-F-substituted

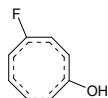

|   |             |             |             |
|---|-------------|-------------|-------------|
| C | 0.33335100  | 1.85761800  | -0.72775600 |
| C | 1.40341600  | 0.68241800  | 0.97331300  |
| C | -0.90048700 | 1.96363200  | -0.14117400 |
| C | -1.79170900 | 0.89089500  | 0.08917600  |
| C | -1.59965600 | -0.47012400 | 0.00787900  |
| C | -0.55108300 | -1.40259900 | -0.23415900 |
| C | 0.82575700  | -1.40391800 | -0.20354400 |
| C | 1.74612000  | -0.42069800 | 0.23947100  |
| H | 0.56588000  | 1.01614300  | -1.36852200 |
| H | 0.95131400  | 2.74182100  | -0.85752100 |
| H | 0.46840200  | 0.67303100  | 1.51582800  |
| H | 2.16075100  | 1.38670300  | 1.30977500  |
| H | -1.20809300 | 2.92848400  | 0.25726600  |
| H | -2.80316500 | 1.15319300  | 0.39087200  |
| H | -0.98049000 | -2.37099200 | -0.48549300 |
| H | 1.29743100  | -2.30748900 | -0.58281000 |
| O | 3.01685100  | -0.61546100 | -0.24067400 |
| H | 3.64122300  | -0.06253700 | 0.24960500  |
| F | -2.78025800 | -1.15755700 | 0.16412800  |

2-OH-5-CHO-substituted

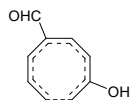

|   |             |             |             |
|---|-------------|-------------|-------------|
| C | 0.86631000  | 1.84268000  | -0.75772100 |
| C | 1.78307300  | 0.55967300  | 1.05228900  |
| C | -0.35890000 | 2.06990400  | -0.19249900 |
| C | -1.35393400 | 1.08609500  | 0.00760300  |
| C | -1.32624400 | -0.29673300 | -0.10230800 |
| C | -0.31530700 | -1.29176800 | -0.34449200 |
| C | 1.04799600  | -1.42083200 | -0.23812500 |
| C | 2.03859600  | -0.53768300 | 0.28339200  |
| H | 1.04203000  | 0.95889800  | -1.35771700 |
| H | 1.57631800  | 2.65628200  | -0.87932200 |
| H | 0.81728000  | 0.65564000  | 1.52630400  |
| H | 2.59093100  | 1.17757100  | 1.43727100  |
| H | -0.58265400 | 3.06557900  | 0.18551400  |
| H | -2.33464100 | 1.46352800  | 0.29540700  |
| H | -0.77113600 | -2.22981800 | -0.66698500 |
| H | 1.46098700  | -2.35558300 | -0.61059700 |
| O | 3.30066500  | -0.85218100 | -0.14456100 |
| H | 3.95575800  | -0.35836600 | 0.36878700  |
| C | -2.68692200 | -0.92120600 | 0.01862700  |
| H | -2.72234600 | -2.00726700 | -0.20607900 |
| O | -3.70073100 | -0.34372600 | 0.33791400  |

#### 2-OH-5-CN-substituted

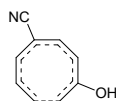

|   |             |             |             |
|---|-------------|-------------|-------------|
| C | 0.95639300  | 1.80891300  | -0.72944300 |
| C | 1.76109200  | 0.44900200  | 1.03489200  |
| C | -0.23006500 | 2.16143800  | -0.14447700 |
| C | -1.32078000 | 1.28798200  | 0.06591100  |
| C | -1.42610800 | -0.09435300 | -0.04949900 |
| C | -0.53079300 | -1.19635200 | -0.31618900 |
| C | 0.81672200  | -1.44842100 | -0.23937800 |
| C | 1.89795600  | -0.66708000 | 0.26041400  |
| H | 1.01985700  | 0.92668700  | -1.35375100 |
| H | 1.74559300  | 2.54496200  | -0.85445500 |
| H | 0.82390600  | 0.62059200  | 1.54414300  |
| H | 2.63166400  | 0.98724900  | 1.40252500  |
| H | -0.34077100 | 3.16801700  | 0.25276200  |
| H | -2.24463700 | 1.77479200  | 0.37183600  |
| H | -1.09063300 | -2.07648300 | -0.62766900 |
| H | 1.12934600  | -2.41497200 | -0.62782600 |
| C | -2.79437100 | -0.55977300 | 0.08783600  |
| N | -3.88327000 | -0.93947800 | 0.19936700  |
| O | 3.11288200  | -1.09075600 | -0.20346800 |
| H | 3.82523400  | -0.67659100 | 0.30420800  |

#### 2-OH-5-NO<sub>2</sub>-substituted

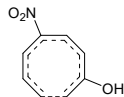

|   |             |             |             |
|---|-------------|-------------|-------------|
| C | 1.38404100  | 1.83648800  | -0.69627600 |
| C | 2.11123000  | 0.41526300  | 1.05910300  |
| C | 0.20020100  | 2.21845100  | -0.12529000 |
| C | -0.93062500 | 1.38880900  | 0.04660200  |
| C | -1.07283100 | 0.02246000  | -0.08203200 |
| C | -0.23645600 | -1.10653800 | -0.36329500 |
| C | 1.10025400  | -1.40369300 | -0.28400300 |
| C | 2.20694400  | -0.68199200 | 0.25264100  |
| H | 1.43033200  | 0.96668500  | -1.33897600 |
| H | 2.20032000  | 2.54753400  | -0.78904700 |
| H | 1.17730300  | 0.61741500  | 1.56291500  |
| H | 3.00093800  | 0.90321600  | 1.45015600  |
| H | 0.12103200  | 3.21813800  | 0.29564000  |
| H | -1.84211200 | 1.89801100  | 0.34236300  |
| H | -0.82651900 | -1.95150000 | -0.70325400 |
| H | 1.38361200  | -2.36438700 | -0.70761200 |
| O | 3.40641400  | -1.14328700 | -0.21232200 |
| H | 4.13202600  | -0.76708300 | 0.30607300  |
| N | -2.51411900 | -0.40773100 | 0.06302800  |
| O | -3.38407300 | 0.44579500  | 0.03629400  |
| O | -2.74167200 | -1.59618300 | 0.21300800  |

#### 2-F-5-CH<sub>3</sub>-substituted

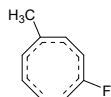

|   |             |             |             |
|---|-------------|-------------|-------------|
| C | 0.54246900  | 1.81488700  | -0.74860600 |
| C | 1.52390100  | 0.64635200  | 0.96085200  |
| C | -0.67741600 | 2.01528300  | -0.15010800 |
| C | -1.65349800 | 1.02642000  | 0.10788400  |
| C | -1.64843900 | -0.36097700 | 0.00543400  |
| C | -0.62164200 | -1.32015700 | -0.27374200 |
| C | 0.75825400  | -1.41020400 | -0.22340300 |
| C | 1.72171900  | -0.50869900 | 0.26232800  |
| H | 0.70050600  | 0.95512200  | -1.38715300 |
| H | 1.21461700  | 2.65426700  | -0.90478600 |
| H | 0.60473000  | 0.75600800  | 1.51707400  |
| H | 2.38095900  | 1.23900800  | 1.26394700  |
| H | -0.89815900 | 3.00746100  | 0.24104500  |
| H | -2.60459100 | 1.43623900  | 0.44489500  |
| H | -1.05998000 | -2.27617800 | -0.56573800 |
| H | 1.18211800  | -2.33128900 | -0.61755200 |
| C | -3.00839700 | -1.03241700 | 0.17167100  |
| F | 2.99279400  | -0.78037300 | -0.14297000 |
| H | -3.79502100 | -0.30835200 | 0.39486600  |
| H | -3.29103700 | -1.55592800 | -0.74952000 |
| H | -2.99099800 | -1.77593000 | 0.97578600  |

#### 2-F-5-NH<sub>2</sub>-substituted

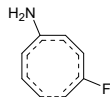

|   |             |             |             |
|---|-------------|-------------|-------------|
| C | 0.47243200  | 1.82801400  | -0.75800900 |
| C | 1.47463600  | 0.68516000  | 0.95159500  |
| C | -0.75713500 | 1.98185200  | -0.16100500 |
| C | -1.68926700 | 0.96776000  | 0.13561600  |
| C | -1.64488200 | -0.42099300 | 0.00406400  |
| C | -0.59527700 | -1.34451800 | -0.31614900 |
| C | 0.78362800  | -1.39446400 | -0.23394800 |
| C | 1.71670200  | -0.47466500 | 0.27325000  |
| H | 0.66670500  | 0.97672900  | -1.39787600 |
| H | 1.10574100  | 2.69652700  | -0.91543800 |
| H | 0.54673300  | 0.77185500  | 1.49808000  |
| H | 2.31165500  | 1.30168300  | 1.26333000  |
| H | -1.00966300 | 2.96674500  | 0.22980700  |
| H | -2.63889100 | 1.33924600  | 0.52025100  |
| H | -1.01880900 | -2.28177100 | -0.67613200 |
| H | 1.23778900  | -2.29065000 | -0.65108400 |
| F | 3.00165600  | -0.71415900 | -0.11417600 |
| N | -2.89031500 | -1.08792900 | 0.10687000  |
| H | -3.66972600 | -0.48877900 | 0.34770400  |
| H | -2.87925400 | -1.91752400 | 0.68837400  |

#### 2-F-5-OH-substituted

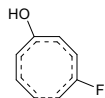

|   |             |             |             |
|---|-------------|-------------|-------------|
| C | 0.41189600  | 1.83941800  | -0.75749700 |
| C | 1.46332500  | 0.70130800  | 0.95202400  |
| C | -0.81224000 | 1.96271100  | -0.14870100 |
| C | -1.72497400 | 0.92199200  | 0.12589600  |
| C | -1.62652900 | -0.45925000 | 0.01426300  |
| C | -0.57422300 | -1.38593600 | -0.25904300 |
| C | 0.80520800  | -1.40064300 | -0.21100300 |
| C | 1.72243400  | -0.44416900 | 0.25958100  |
| H | 0.62272800  | 0.99284900  | -1.39844500 |
| H | 1.03061700  | 2.71923000  | -0.90897900 |
| H | 0.53951700  | 0.76506400  | 1.50861400  |
| H | 2.28691600  | 1.34217600  | 1.24938800  |
| H | -1.08720900 | 2.93696700  | 0.25263300  |
| H | -2.69403800 | 1.26207100  | 0.49338500  |
| H | -1.00258300 | -2.34669500 | -0.53810200 |
| H | 1.27219400  | -2.30142900 | -0.60279200 |
| F | 3.00359200  | -0.64891000 | -0.15366100 |
| O | -2.80345800 | -1.17072000 | 0.17261900  |
| H | -3.56218800 | -0.57686000 | 0.09317600  |

#### 2-F-5-F-substituted

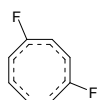

|   |            |            |             |
|---|------------|------------|-------------|
| C | 0.35447100 | 1.86109800 | -0.74234200 |
|---|------------|------------|-------------|

|   |             |             |             |
|---|-------------|-------------|-------------|
| C | 1.44206600  | 0.70107600  | 0.96683400  |
| C | -0.87050800 | 1.96273200  | -0.13620800 |
| C | -1.76664400 | 0.89630400  | 0.10153300  |
| C | -1.59311200 | -0.46768700 | 0.00940000  |
| C | -0.55590800 | -1.40660500 | -0.24260700 |
| C | 0.82265400  | -1.40392400 | -0.21412300 |
| C | 1.72028100  | -0.42234300 | 0.24988300  |
| H | 0.58006400  | 1.01951700  | -1.38499300 |
| H | 0.96998500  | 2.74577200  | -0.87777800 |
| H | 0.51552700  | 0.74362200  | 1.52092600  |
| H | 2.25119800  | 1.35871700  | 1.26659500  |
| H | -1.16965700 | 2.92727700  | 0.26967200  |
| H | -2.77115500 | 1.16809500  | 0.41749300  |
| H | -0.98807000 | -2.37225100 | -0.49849500 |
| H | 1.30287200  | -2.30013700 | -0.59935400 |
| F | 3.00036500  | -0.59453600 | -0.17442600 |
| F | -2.77931700 | -1.14041000 | 0.16683900  |

#### 2-F-5-CHO-substituted

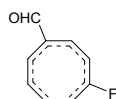

|   |             |             |             |
|---|-------------|-------------|-------------|
| C | 0.89007800  | 1.83283400  | -0.76768700 |
| C | 1.82628100  | 0.58519200  | 1.03503100  |
| C | -0.32899300 | 2.06089200  | -0.18584600 |
| C | -1.32979500 | 1.08608300  | 0.01891200  |
| C | -1.31950400 | -0.29805800 | -0.09905700 |
| C | -0.32177900 | -1.30072000 | -0.33687400 |
| C | 1.04526300  | -1.42624200 | -0.23278300 |
| C | 2.01196200  | -0.53713900 | 0.29316100  |
| H | 1.05129200  | 0.95278400  | -1.37709900 |
| H | 1.60000100  | 2.64498800  | -0.89676000 |
| H | 0.88089100  | 0.73138600  | 1.53524200  |
| H | 2.68596800  | 1.15464400  | 1.37241700  |
| H | -0.54202900 | 3.05624300  | 0.19939400  |
| H | -2.30441600 | 1.47267500  | 0.31504500  |
| H | -0.78038100 | -2.23977100 | -0.65152400 |
| H | 1.46614200  | -2.35863500 | -0.60175000 |
| C | -2.69011700 | -0.90658200 | 0.01335500  |
| F | 3.28268800  | -0.83071400 | -0.08444800 |
| H | -2.73888900 | -1.99067000 | -0.21733200 |
| O | -3.69539300 | -0.31559800 | 0.33164100  |

#### 2-F-5-CN-substituted

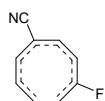

|   |             |             |             |
|---|-------------|-------------|-------------|
| C | 0.98408000  | 1.79859900  | -0.74124900 |
| C | 1.80584900  | 0.46398100  | 1.01665400  |
| C | -0.19533900 | 2.15118600  | -0.13871500 |
| C | -1.29156700 | 1.28884100  | 0.07887200  |
| C | -1.41829000 | -0.09285200 | -0.04587400 |
| C | -0.53964100 | -1.20161600 | -0.31385100 |
| C | 0.81133800  | -1.45369700 | -0.24083600 |



|   |             |             |             |
|---|-------------|-------------|-------------|
| C | 1.87036700  | -0.66953600 | 0.26928400  |
| H | 1.03383900  | 0.92114800  | -1.37321600 |
| H | 1.77266300  | 2.53357600  | -0.87390600 |
| H | 0.89266900  | 0.68725200  | 1.54773800  |
| H | 2.72267200  | 0.94502300  | 1.34128900  |
| H | -0.29458900 | 3.15660800  | 0.26477100  |
| H | -2.20598500 | 1.78533600  | 0.39708700  |
| H | -1.10409100 | -2.08002100 | -0.62082300 |
| H | 1.13015200  | -2.41765600 | -0.62997400 |
| C | -2.79439500 | -0.53795900 | 0.08666200  |
| N | -3.88937200 | -0.90032000 | 0.19327200  |
| F | 3.09820700  | -1.07896700 | -0.13683900 |

#### 2-F-5-NO<sub>2</sub>-substituted

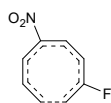

|   |             |             |             |
|---|-------------|-------------|-------------|
| C | 1.41673500  | 1.75358700  | -0.84998100 |
| C | 2.15869400  | 0.50143800  | 1.00666500  |
| C | 0.24280500  | 2.18479300  | -0.28989000 |
| C | -0.89213200 | 1.38652200  | -0.02901300 |
| C | -1.05880600 | 0.01569300  | -0.07312700 |
| C | -0.24711000 | -1.13906100 | -0.27381000 |
| C | 1.09116100  | -1.43879900 | -0.15877900 |
| C | 2.17743800  | -0.67517500 | 0.32585600  |
| H | 1.44866600  | 0.83928400  | -1.42838900 |
| H | 2.23186700  | 2.45322900  | -1.01154900 |
| H | 1.25111700  | 0.80176100  | 1.50836700  |
| H | 3.09410300  | 0.95524500  | 1.31727900  |
| H | 0.17882600  | 3.21633400  | 0.04931200  |
| H | -1.78653000 | 1.92791500  | 0.26119500  |
| H | -0.84851100 | -1.99700900 | -0.55527700 |
| H | 1.37488600  | -2.43445200 | -0.49069000 |
| F | 3.38963000  | -1.16406400 | -0.03479500 |
| N | -2.51913800 | -0.36955900 | 0.07753100  |
| O | -2.87656100 | -1.45342000 | -0.34629600 |
| O | -3.26716900 | 0.42431700  | 0.61787800  |

#### 2-CHO-5-CH<sub>3</sub>-substituted

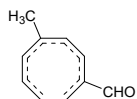

|   |             |             |             |
|---|-------------|-------------|-------------|
| C | -0.11714200 | 1.93259500  | -0.80414600 |
| C | 0.95121800  | 1.05116200  | 1.02787900  |
| C | -1.36989300 | 1.92012100  | -0.24916600 |
| C | -2.15587900 | 0.77256800  | 0.02837500  |
| C | -1.87283200 | -0.58376700 | -0.00348600 |
| C | -0.65999400 | -1.33211000 | -0.21493000 |
| C | 0.70020600  | -1.14973500 | -0.08457700 |
| C | 1.46836400  | -0.05812300 | 0.39841900  |
| H | 0.23520100  | 1.07827300  | -1.36799300 |
| H | 0.38602800  | 2.87773800  | -0.98832600 |
| H | -0.00858700 | 0.99779100  | 1.52237400  |
| H | 1.61983700  | 1.84715500  | 1.35257000  |

|   |             |             |             |
|---|-------------|-------------|-------------|
| H | -1.79124500 | 2.86807100  | 0.08361200  |
| H | -3.18148000 | 1.00633600  | 0.30897100  |
| H | -0.89454400 | -2.35726300 | -0.50714000 |
| H | 1.30701700  | -1.99094800 | -0.41554400 |
| C | 2.92340200  | -0.06287600 | 0.11507700  |
| H | 3.45794300  | 0.85948100  | 0.42729300  |
| O | 3.53056100  | -0.97664400 | -0.39861300 |
| C | -3.07342500 | -1.50803000 | 0.15507100  |
| H | -3.98834500 | -0.95398600 | 0.37541500  |
| H | -3.23930800 | -2.07379800 | -0.76966800 |
| H | -2.91115000 | -2.23652300 | 0.95625100  |

#### 2-CHO-5-NH<sub>2</sub>-substituted

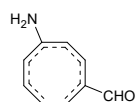

|   |             |             |             |
|---|-------------|-------------|-------------|
| C | -0.20457200 | 1.95008800  | -0.83843900 |
| C | 0.91024300  | 1.05166000  | 1.04361500  |
| C | -1.44529300 | 1.86944900  | -0.26483700 |
| C | -2.17836200 | 0.70490000  | 0.06598800  |
| C | -1.86167600 | -0.64754500 | 0.00376600  |
| C | -0.63016200 | -1.35487300 | -0.27919800 |
| C | 0.71496500  | -1.13164100 | -0.12279100 |
| C | 1.45483100  | -0.03567000 | 0.40593600  |
| H | 0.21137200  | 1.11363000  | -1.38504100 |
| H | 0.24261000  | 2.92251200  | -1.02251200 |
| H | -0.06938500 | 0.99118100  | 1.49702900  |
| H | 1.56057800  | 1.85369100  | 1.38951300  |
| H | -1.90399500 | 2.80077400  | 0.06661600  |
| H | -3.18807700 | 0.89571800  | 0.42741900  |
| H | -0.83781100 | -2.35660500 | -0.65710700 |
| H | 1.35065200  | -1.93459600 | -0.49292400 |
| C | 2.91162300  | -0.01463900 | 0.14552400  |
| H | 3.42986000  | 0.90249500  | 0.49753300  |
| O | 3.53895400  | -0.90308100 | -0.39014600 |
| N | -2.93312500 | -1.51304700 | 0.25535800  |
| H | -3.84303100 | -1.22245000 | -0.07561800 |
| H | -2.76211400 | -2.50074900 | 0.13137600  |

#### 2-CHO-5-OH-substituted

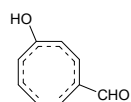

|   |             |             |             |
|---|-------------|-------------|-------------|
| C | -0.22919900 | 1.92654200  | -0.81710500 |
| C | 0.89307400  | 1.05933700  | 1.03209500  |
| C | -1.47253100 | 1.84595600  | -0.25053400 |
| C | -2.20154700 | 0.66718900  | 0.04129900  |
| C | -1.84421900 | -0.67010800 | 0.00233100  |
| C | -0.61850600 | -1.39406400 | -0.20699600 |
| C | 0.72695600  | -1.15297800 | -0.07413500 |
| C | 1.45216600  | -0.02557800 | 0.40103100  |
| H | 0.17403100  | 1.09467200  | -1.38054600 |
| H | 0.22393900  | 2.89786400  | -0.99182400 |

|   |             |             |             |
|---|-------------|-------------|-------------|
| H | -0.07090800 | 0.97428400  | 1.51489600  |
| H | 1.52817700  | 1.88264300  | 1.35507900  |
| H | -1.93627300 | 2.77005200  | 0.09245400  |
| H | -3.23246800 | 0.84263000  | 0.35062700  |
| H | -0.85253500 | -2.41715400 | -0.49511600 |
| H | 1.36648200  | -1.97054100 | -0.40251400 |
| C | 2.90456400  | 0.02452800  | 0.11322600  |
| H | 3.40718200  | 0.96156300  | 0.43411000  |
| O | 3.54115800  | -0.86159200 | -0.41324800 |
| O | -2.86024900 | -1.58547500 | 0.15964100  |
| H | -3.71945300 | -1.14442600 | 0.10442400  |

#### 2-CHO-5-F-substituted

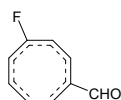

|   |             |             |             |
|---|-------------|-------------|-------------|
| C | -0.27429000 | 1.92839900  | -0.79920100 |
| C | 0.87337000  | 1.05191100  | 1.04326600  |
| C | -1.51867000 | 1.83623200  | -0.23909200 |
| C | -2.23260800 | 0.63818600  | 0.01514500  |
| C | -1.81373900 | -0.67026200 | -0.00278200 |
| C | -0.60634700 | -1.41529200 | -0.17450600 |
| C | 0.73964800  | -1.16343200 | -0.06011300 |
| C | 1.44451800  | -0.01698500 | 0.39787800  |
| H | 0.13380400  | 1.10267100  | -1.36867700 |
| H | 0.17986800  | 2.90167300  | -0.96031100 |
| H | -0.08701200 | 0.94991100  | 1.53012700  |
| H | 1.49493500  | 1.88625500  | 1.36353500  |
| H | -1.99795000 | 2.74999500  | 0.10834200  |
| H | -3.28343700 | 0.74346600  | 0.27347000  |
| H | -0.84735800 | -2.44477200 | -0.43326000 |
| H | 1.38693400  | -1.97873100 | -0.37768000 |
| C | 2.89571900  | 0.06031800  | 0.09634500  |
| H | 3.38512900  | 1.00580800  | 0.41142300  |
| O | 3.53932500  | -0.81636400 | -0.43497700 |
| F | -2.85834600 | -1.54220200 | 0.14124500  |

#### 2-CHO-5-CHO-substituted

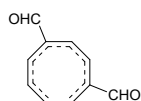

|   |             |             |             |
|---|-------------|-------------|-------------|
| C | 0.33063000  | 1.99577900  | -0.80846400 |
| C | 1.31102300  | 0.98652500  | 1.07988500  |
| C | -0.92689500 | 2.07443700  | -0.27277500 |
| C | -1.79241900 | 0.97727700  | -0.05023900 |
| C | -1.57607400 | -0.39047500 | -0.09612000 |
| C | -0.43422100 | -1.24786900 | -0.26029800 |
| C | 0.92995900  | -1.16850200 | -0.09536000 |
| C | 1.75467500  | -0.12890300 | 0.41576100  |
| H | 0.63392400  | 1.11412500  | -1.35865500 |
| H | 0.91730300  | 2.89648300  | -0.96705000 |
| H | 0.33120600  | 1.00719100  | 1.53570000  |
| H | 2.02712000  | 1.72668800  | 1.43337600  |
| H | -1.29104100 | 3.04599000  | 0.05664900  |
| H | -2.82232800 | 1.23505000  | 0.19301700  |

|   |             |             |             |
|---|-------------|-------------|-------------|
| H | -0.74326700 | -2.25072500 | -0.56023900 |
| H | 1.48638400  | -2.04887400 | -0.41136000 |
| C | 3.21626600  | -0.22418600 | 0.15364600  |
| H | 3.80751100  | 0.64984000  | 0.49817800  |
| O | 3.76189200  | -1.16443700 | -0.37650200 |
| C | -2.84988600 | -1.18971300 | 0.01298300  |
| H | -2.73545300 | -2.27709700 | -0.17114900 |
| O | -3.93560600 | -0.73617600 | 0.28617800  |

#### 2-CHO-5-CN-substituted

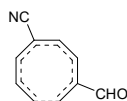

|   |             |             |             |
|---|-------------|-------------|-------------|
| C | 0.35986100  | 2.01246900  | -0.78841600 |
| C | 1.28698600  | 0.96401100  | 1.06891500  |
| C | -0.88390600 | 2.17784000  | -0.23911300 |
| C | -1.82147300 | 1.14477700  | -0.00443600 |
| C | -1.68651100 | -0.23782100 | -0.05097900 |
| C | -0.60714000 | -1.17845500 | -0.22969100 |
| C | 0.76112200  | -1.17117900 | -0.08421600 |
| C | 1.65440200  | -0.18229900 | 0.40807800  |
| H | 0.59008500  | 1.11903700  | -1.35462400 |
| H | 1.00378600  | 2.87199000  | -0.95213100 |
| H | 0.32350900  | 1.03771400  | 1.55349000  |
| H | 2.05179200  | 1.66223600  | 1.40559100  |
| H | -1.17581300 | 3.16952300  | 0.10093200  |
| H | -2.82202800 | 1.48481200  | 0.25307900  |
| H | -0.98980700 | -2.15523600 | -0.52040400 |
| H | 1.25827100  | -2.08315100 | -0.40967300 |
| C | 3.10283500  | -0.36638400 | 0.11985900  |
| H | 3.75149300  | 0.47328800  | 0.44566400  |
| O | 3.58004000  | -1.34209800 | -0.41100200 |
| C | -2.96320400 | -0.92175600 | 0.06784600  |
| N | -3.97849300 | -1.47009200 | 0.16557300  |

#### 2-CHO-5-NO<sub>2</sub>-substituted

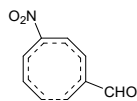

|   |             |             |             |
|---|-------------|-------------|-------------|
| C | 0.83717100  | 2.08722100  | -0.73847800 |
| C | 1.68056000  | 0.94909600  | 1.09576000  |
| C | -0.40281000 | 2.30798200  | -0.19921600 |
| C | -1.40818900 | 1.33144500  | -0.00964500 |
| C | -1.34123300 | -0.04406400 | -0.07301300 |
| C | -0.34067500 | -1.04770300 | -0.25768600 |
| C | 1.02644700  | -1.11868900 | -0.11624500 |
| C | 1.97634500  | -0.19945100 | 0.40300000  |
| H | 1.02341100  | 1.20197900  | -1.33303300 |
| H | 1.53010500  | 2.91386600  | -0.86781200 |
| H | 0.72347700  | 1.06969700  | 1.58341500  |
| H | 2.48753800  | 1.58809700  | 1.45114500  |
| H | -0.63729300 | 3.30332700  | 0.17267500  |
| H | -2.39279000 | 1.71638200  | 0.23431300  |
| H | -0.78140900 | -1.99018300 | -0.56626600 |
| H | 1.47033300  | -2.04529900 | -0.47475100 |

|   |             |             |             |
|---|-------------|-------------|-------------|
| C | 3.41222600  | -0.46071900 | 0.10548900  |
| H | 4.11057000  | 0.32751100  | 0.45622600  |
| O | 3.82836200  | -1.44565500 | -0.45793300 |
| N | -2.71823200 | -0.67474600 | 0.04170700  |
| O | -3.69522600 | 0.04137300  | -0.08279100 |
| O | -2.77630700 | -1.86982400 | 0.26476600  |

2-CN-5-CH<sub>3</sub>-substituted

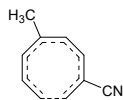

|   |             |             |             |
|---|-------------|-------------|-------------|
| C | 0.11146200  | 1.88144800  | -0.75533500 |
| C | 1.09686000  | 0.80063100  | 1.05320300  |
| C | -1.12730000 | 1.97320100  | -0.18202800 |
| C | -2.02411900 | 0.89959900  | 0.06065800  |
| C | -1.87906800 | -0.47498200 | -0.01944700 |
| C | -0.75013500 | -1.33377300 | -0.27650600 |
| C | 0.62321200  | -1.30425700 | -0.16677100 |
| C | 1.50271900  | -0.31312600 | 0.35861600  |
| H | 0.37650000  | 1.01604800  | -1.34911500 |
| H | 0.71416400  | 2.77330100  | -0.90214900 |
| H | 0.12659100  | 0.79255300  | 1.53011600  |
| H | 1.82587200  | 1.51906600  | 1.41464000  |
| H | -1.44874000 | 2.94486200  | 0.19067000  |
| H | -3.01903400 | 1.22438000  | 0.36016400  |
| H | -1.09112700 | -2.31777200 | -0.60245700 |
| H | 1.12251900  | -2.19459200 | -0.54305800 |
| C | 2.89828100  | -0.43544000 | 0.01218500  |
| N | 4.01874600  | -0.53292600 | -0.26629700 |
| C | -3.16271100 | -1.28199000 | 0.12963400  |
| H | -4.01779100 | -0.64671900 | 0.36949300  |
| H | -3.38919700 | -1.80977500 | -0.80460000 |
| H | -3.06619400 | -2.03873100 | 0.91511400  |

2-CN-5-NH<sub>2</sub>-substituted

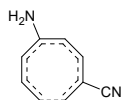

|   |             |             |             |
|---|-------------|-------------|-------------|
| C | 0.03083900  | 1.89719700  | -0.77519800 |
| C | 1.05746700  | 0.81149300  | 1.05030400  |
| C | -1.20571600 | 1.93492700  | -0.19052100 |
| C | -2.05713200 | 0.83980200  | 0.09686200  |
| C | -1.87396700 | -0.53216400 | -0.01708000 |
| C | -0.72436000 | -1.35081900 | -0.34021800 |
| C | 0.64042500  | -1.28731800 | -0.20312200 |
| C | 1.49536500  | -0.29009700 | 0.35820200  |
| H | 0.33832600  | 1.04281200  | -1.36443300 |
| H | 0.59075800  | 2.81587800  | -0.92212000 |
| H | 0.07535300  | 0.79052400  | 1.50240700  |
| H | 1.76796500  | 1.54052000  | 1.42693900  |
| H | -1.55702600 | 2.89511100  | 0.18551300  |
| H | -3.04552500 | 1.12637100  | 0.45413800  |
| H | -1.05432800 | -2.30546200 | -0.74902300 |
| H | 1.16552400  | -2.14704000 | -0.61402500 |
| C | 2.89701100  | -0.38771000 | 0.03344500  |

|   |             |             |             |
|---|-------------|-------------|-------------|
| N | 4.02353000  | -0.46857200 | -0.22624000 |
| N | -3.03011500 | -1.32389500 | 0.09011400  |
| H | -3.87282700 | -0.83186400 | 0.35708800  |
| H | -2.92171200 | -2.19144100 | 0.60036000  |

2-CN-5-OH-substituted

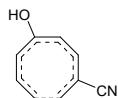

|   |             |             |             |
|---|-------------|-------------|-------------|
| C | 0.00946200  | 1.88766500  | -0.76617300 |
| C | 1.04998900  | 0.80794700  | 1.05983700  |
| C | -1.22448700 | 1.91767900  | -0.18019500 |
| C | -2.07468900 | 0.81075900  | 0.07283800  |
| C | -1.86043800 | -0.55247700 | -0.01483700 |
| C | -0.71991700 | -1.39435100 | -0.26926200 |
| C | 0.64558000  | -1.31283100 | -0.15664300 |
| C | 1.49247500  | -0.28611300 | 0.36125700  |
| H | 0.31906100  | 1.03704400  | -1.36007900 |
| H | 0.57110100  | 2.80679100  | -0.90302000 |
| H | 0.07489000  | 0.77265000  | 1.52661300  |
| H | 1.75241000  | 1.55310600  | 1.41929700  |
| H | -1.58338600 | 2.87073800  | 0.20568500  |
| H | -3.08004700 | 1.08201700  | 0.39620200  |
| H | -1.06597000 | -2.37485500 | -0.59002000 |
| H | 1.17421300  | -2.18753400 | -0.52907600 |
| C | 2.88908200  | -0.35903100 | 0.00688300  |
| N | 4.01012900  | -0.41576300 | -0.28025800 |
| O | -2.96265800 | -1.36559000 | 0.12800900  |
| H | -3.77425000 | -0.84036500 | 0.08990000  |

2-CN-5-F-substituted

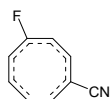

|   |             |             |             |
|---|-------------|-------------|-------------|
| C | -0.02608300 | 1.89554500  | -0.74733600 |
| C | 1.03677000  | 0.79628200  | 1.07507100  |
| C | -1.26016800 | 1.91746100  | -0.16456100 |
| C | -2.10260800 | 0.79414700  | 0.04767200  |
| C | -1.83159200 | -0.54902300 | -0.02134300 |
| C | -0.71450500 | -1.41760700 | -0.23447500 |
| C | 0.65204000  | -1.33073800 | -0.13727600 |
| C | 1.48591500  | -0.28328600 | 0.36087700  |
| H | 0.28626000  | 1.04972100  | -1.34728500 |
| H | 0.54064200  | 2.81381200  | -0.86909600 |
| H | 0.06444500  | 0.74845700  | 1.54671900  |
| H | 1.73050700  | 1.55193400  | 1.42906100  |
| H | -1.63101600 | 2.86222400  | 0.22876200  |
| H | -3.13526600 | 1.00416900  | 0.31546800  |
| H | -1.07188700 | -2.40363700 | -0.52500200 |
| H | 1.18575700  | -2.20881900 | -0.49319500 |
| C | 2.87983400  | -0.33238400 | -0.01135600 |
| N | 3.99710100  | -0.36988900 | -0.31452100 |
| F | -2.96297400 | -1.30789100 | 0.10139800  |

## 2-CN-5-CHO-substituted

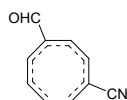

|   |             |             |             |
|---|-------------|-------------|-------------|
| C | 0.51086700  | 1.92170200  | -0.76148600 |
| C | 1.42447200  | 0.74017300  | 1.10469600  |
| C | -0.72875500 | 2.06661700  | -0.20442500 |
| C | -1.67173600 | 1.02548900  | -0.01778000 |
| C | -1.55607300 | -0.35052300 | -0.11110200 |
| C | -0.48165100 | -1.28439500 | -0.31754300 |
| C | 0.88533800  | -1.32064700 | -0.17337300 |
| C | 1.78999800  | -0.35894600 | 0.37428200  |
| H | 0.75369200  | 1.04131400  | -1.34292000 |
| H | 1.16692100  | 2.77947100  | -0.88039500 |
| H | 0.43795900  | 0.78022600  | 1.54505400  |
| H | 2.17485800  | 1.42355300  | 1.48916000  |
| H | -1.01996700 | 3.04751500  | 0.16689000  |
| H | -2.67965000 | 1.34777200  | 0.24098200  |
| H | -0.86767400 | -2.25060500 | -0.64644700 |
| H | 1.35676900  | -2.23428000 | -0.52810800 |
| C | 3.18607000  | -0.52635000 | 0.04179200  |
| N | 4.30383600  | -0.66102800 | -0.22933100 |
| C | -2.88439600 | -1.05866300 | -0.01602300 |
| H | -2.85291200 | -2.14384800 | -0.24167300 |
| O | -3.93020700 | -0.53633300 | 0.28606900  |

## 2-CN-5-CN-substituted

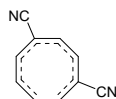

|   |             |             |             |
|---|-------------|-------------|-------------|
| C | 0.54649500  | 1.92742400  | -0.73996400 |
| C | 1.38930600  | 0.70777800  | 1.09540000  |
| C | -0.67218800 | 2.16622400  | -0.16769400 |
| C | -1.68947400 | 1.20032200  | 0.03035100  |
| C | -1.66300300 | -0.18456500 | -0.06409700 |
| C | -0.66158000 | -1.20170900 | -0.28627900 |
| C | 0.70233000  | -1.31807000 | -0.16255500 |
| C | 1.67553600  | -0.41733100 | 0.36642400  |
| H | 0.70735000  | 1.03961100  | -1.33865900 |
| H | 1.26452100  | 2.73283000  | -0.86402700 |
| H | 0.41855500  | 0.80105200  | 1.56238400  |
| H | 2.18734200  | 1.34322900  | 1.46616000  |
| H | -0.88139600 | 3.16210300  | 0.21781000  |
| H | -2.66022400 | 1.60763700  | 0.30427100  |
| H | -1.12395200 | -2.13421900 | -0.60460100 |
| H | 1.10620200  | -2.25939500 | -0.52739600 |
| C | 3.05183500  | -0.67166300 | 0.00972200  |
| N | 4.15425500  | -0.87529900 | -0.28040100 |
| C | -2.98616400 | -0.77460500 | 0.04663200  |
| N | -4.03667800 | -1.25265500 | 0.13988900  |

2-CN-5-NO<sub>2</sub>-substituted

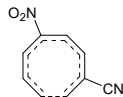

|   |             |             |             |
|---|-------------|-------------|-------------|
| C | 0.99564700  | 1.91324200  | -0.86661100 |
| C | 1.77133800  | 0.78563400  | 1.05866900  |
| C | -0.21429100 | 2.24372600  | -0.32269200 |
| C | -1.27847500 | 1.34426800  | -0.06590800 |
| C | -1.29825500 | -0.03248000 | -0.07133900 |
| C | -0.37168100 | -1.11072300 | -0.21953100 |
| C | 0.98419200  | -1.28285700 | -0.06907800 |
| C | 1.99882500  | -0.39852700 | 0.40619500  |
| H | 1.12152900  | 0.98142600  | -1.40364300 |
| H | 1.74842500  | 2.67748600  | -1.03653900 |
| H | 0.80708800  | 0.96245700  | 1.51451100  |
| H | 2.60209600  | 1.40112500  | 1.38903100  |
| H | -0.38063500 | 3.27161500  | -0.00719100 |
| H | -2.23034300 | 1.80125200  | 0.18529700  |
| H | -0.88568800 | -2.02650700 | -0.49399800 |
| H | 1.34362600  | -2.26460900 | -0.36749100 |
| C | 3.36181800  | -0.74395400 | 0.07444300  |
| N | 4.45427000  | -1.01629300 | -0.19598300 |
| N | -2.71688700 | -0.55961800 | 0.05648000  |
| O | -3.52323400 | 0.12346600  | 0.65865500  |
| O | -2.97457800 | -1.63382000 | -0.45219900 |

#### 2-NO<sub>2</sub>-5-CH<sub>3</sub>-substituted

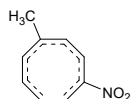

|   |             |             |             |
|---|-------------|-------------|-------------|
| C | -0.28093200 | 1.89170400  | -0.84352000 |
| C | 0.73391000  | 0.91223100  | 1.01824000  |
| C | -1.51211100 | 1.97063700  | -0.25606500 |
| C | -2.38301300 | 0.88443600  | 0.03519900  |
| C | -2.20698500 | -0.48707600 | 0.00821000  |
| C | -1.05832500 | -1.32962700 | -0.22673500 |
| C | 0.31147400  | -1.26395000 | -0.11361900 |
| C | 1.13676400  | -0.22132200 | 0.37579500  |
| H | 0.00212100  | 1.00896500  | -1.40327500 |
| H | 0.30174300  | 2.79021200  | -1.02479800 |
| H | -0.23163500 | 0.90025100  | 1.50362100  |
| H | 1.45817000  | 1.65947100  | 1.32121000  |
| H | -1.85272500 | 2.94638800  | 0.08798900  |
| H | -3.38283800 | 1.19842100  | 0.32969500  |
| H | -1.37687300 | -2.33108900 | -0.51951800 |
| H | 0.84851100  | -2.14684200 | -0.44483200 |
| N | 2.57073400  | -0.30909500 | 0.01733000  |
| O | 3.25347500  | 0.69177300  | 0.16054600  |
| O | 2.99380600  | -1.37555500 | -0.39536100 |
| C | -3.46857500 | -1.31831400 | 0.19986200  |
| H | -4.33499700 | -0.69618400 | 0.43312800  |
| H | -3.69479400 | -1.87848500 | -0.71536600 |
| H | -3.34331400 | -2.04950800 | 1.00514400  |

#### 2-NO<sub>2</sub>-5-NH<sub>2</sub>-substituted



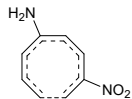

|   |             |             |             |
|---|-------------|-------------|-------------|
| C | -0.43450500 | 1.96620000  | -0.89253500 |
| C | 0.74499500  | 0.96138900  | 0.99376500  |
| C | -1.65521000 | 1.92176400  | -0.27053200 |
| C | -2.43785000 | 0.79696600  | 0.08903300  |
| C | -2.20924800 | -0.57827000 | 0.02491700  |
| C | -1.02896200 | -1.36395700 | -0.27150000 |
| C | 0.33329500  | -1.23150300 | -0.14752700 |
| C | 1.14584900  | -0.17671400 | 0.35110100  |
| H | -0.05406300 | 1.12094400  | -1.44733500 |
| H | 0.04255000  | 2.92211300  | -1.08121800 |
| H | -0.22600200 | 0.98069600  | 1.46131700  |
| H | 1.48047000  | 1.69745900  | 1.28962000  |
| H | -2.06562000 | 2.87158500  | 0.07191200  |
| H | -3.42827400 | 1.05623400  | 0.46221200  |
| H | -1.31681400 | -2.35237800 | -0.62757600 |
| H | 0.90626200  | -2.07815900 | -0.50901000 |
| N | 2.58935200  | -0.27670700 | 0.02594500  |
| N | -3.33306100 | -1.39794700 | 0.18782300  |
| H | -4.19097300 | -0.93378000 | 0.44886600  |
| H | -3.18876200 | -2.26633900 | 0.68338400  |
| O | 3.00735100  | -1.32977300 | -0.46123400 |
| O | 3.30477400  | 0.69589200  | 0.27262400  |

#### 2-NO<sub>2</sub>-5-OH-substituted

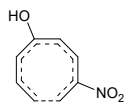

|   |             |             |             |
|---|-------------|-------------|-------------|
| C | -0.37358300 | 1.88432200  | -0.86857200 |
| C | 0.69274500  | 0.91106200  | 1.02258900  |
| C | -1.59690200 | 1.91038700  | -0.26457100 |
| C | -2.42535600 | 0.79819200  | 0.04600300  |
| C | -2.18804700 | -0.56233500 | 0.01959600  |
| C | -1.03181700 | -1.39521600 | -0.20788700 |
| C | 0.32920400  | -1.28256600 | -0.09607400 |
| C | 1.12592300  | -0.20723800 | 0.37902600  |
| H | -0.04800700 | 1.01262700  | -1.42279800 |
| H | 0.17029500  | 2.80683500  | -1.04657500 |
| H | -0.27918800 | 0.88060700  | 1.49516900  |
| H | 1.39395000  | 1.68176500  | 1.32029500  |
| H | -1.97000200 | 2.87108600  | 0.08766500  |
| H | -3.43291500 | 1.06683800  | 0.36453900  |
| H | -1.35979000 | -2.39382300 | -0.48850800 |
| H | 0.89137400  | -2.15221300 | -0.42013000 |
| N | 2.55911600  | -0.25408300 | 0.01272900  |
| O | 3.22321300  | 0.75343400  | 0.19093700  |
| O | 3.00007500  | -1.29605100 | -0.44200500 |
| O | -3.27067600 | -1.38902100 | 0.21028900  |
| H | -4.09344100 | -0.88168100 | 0.16680200  |

#### 2-NO<sub>2</sub>-5-F-substituted

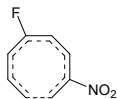

|   |             |             |             |
|---|-------------|-------------|-------------|
| C | -0.40176700 | 1.89139300  | -0.84283900 |
| C | 0.67954000  | 0.89606500  | 1.04015300  |
| C | -1.62798800 | 1.90956600  | -0.24684900 |
| C | -2.44994100 | 0.77973400  | 0.01980800  |
| C | -2.15809300 | -0.55957600 | 0.01050600  |
| C | -1.02628900 | -1.41955700 | -0.17140800 |
| C | 0.33632300  | -1.30351900 | -0.07413400 |
| C | 1.11857500  | -0.20984300 | 0.38153400  |
| H | -0.07427200 | 1.02607700  | -1.40645000 |
| H | 0.14848100  | 2.81369400  | -1.00248100 |
| H | -0.28862200 | 0.85380100  | 1.51984100  |
| H | 1.37305500  | 1.67571500  | 1.33250200  |
| H | -2.01291500 | 2.86158900  | 0.11437600  |
| H | -3.48423800 | 0.98498000  | 0.28491900  |
| H | -1.36658400 | -2.42262600 | -0.42031500 |
| H | 0.90322600  | -2.17591600 | -0.38149300 |
| N | 2.55068500  | -0.23505100 | -0.00155900 |
| O | 3.19682300  | 0.78597600  | 0.15897600  |
| O | 3.00170100  | -1.27370600 | -0.45156300 |
| F | -3.27369800 | -1.33063200 | 0.17889800  |

#### 2-NO<sub>2</sub>-5-CHO-substituted

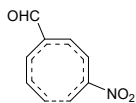

|   |             |             |             |
|---|-------------|-------------|-------------|
| C | 0.10769900  | 1.94972500  | -0.84762700 |
| C | 1.05551000  | 0.86913200  | 1.06406300  |
| C | -1.12713400 | 2.07927200  | -0.27913200 |
| C | -2.04393400 | 1.02098700  | -0.04930800 |
| C | -1.89646200 | -0.35346400 | -0.09274700 |
| C | -0.80113600 | -1.27000600 | -0.27136600 |
| C | 0.56518400  | -1.26826000 | -0.12449500 |
| C | 1.41527400  | -0.25196400 | 0.38447300  |
| H | 0.36627300  | 1.05495300  | -1.40035400 |
| H | 0.74451600  | 2.81685600  | -0.99819000 |
| H | 0.07533800  | 0.90144400  | 1.51811700  |
| H | 1.80416100  | 1.58237600  | 1.38909000  |
| H | -1.43873500 | 3.06335100  | 0.06643000  |
| H | -3.05771600 | 1.32894400  | 0.20411700  |
| H | -1.16471500 | -2.25606600 | -0.56411200 |
| H | 1.07421500  | -2.17536100 | -0.43319100 |
| N | 2.85535400  | -0.38412300 | 0.03969300  |
| O | 3.56156200  | 0.59887600  | 0.18081800  |
| O | 3.24715300  | -1.46543900 | -0.36005400 |
| C | -3.20799900 | -1.08900700 | 0.03731400  |
| H | -3.15182400 | -2.18100600 | -0.14586100 |
| O | -4.26384000 | -0.57907700 | 0.32411700  |

#### 2-NO<sub>2</sub>-5-CN-substituted

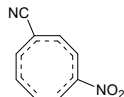

|   |             |             |             |
|---|-------------|-------------|-------------|
| C | 0.13725100  | 1.97947600  | -0.81229200 |
| C | 1.02113800  | 0.85711400  | 1.06808200  |
| C | -1.08292000 | 2.18845800  | -0.23461400 |
| C | -2.06822200 | 1.19446300  | -0.00248700 |
| C | -1.99884000 | -0.19026500 | -0.05085900 |
| C | -0.96606700 | -1.18332200 | -0.24322400 |
| C | 0.39950200  | -1.24957400 | -0.11158300 |
| C | 1.31097500  | -0.28462600 | 0.38674900  |
| H | 0.32620000  | 1.07933700  | -1.38424600 |
| H | 0.82994700  | 2.80297400  | -0.95915000 |
| H | 0.05599300  | 0.93600600  | 1.54824800  |
| H | 1.81345600  | 1.52718700  | 1.38144500  |
| H | -1.32392900 | 3.18632700  | 0.12663900  |
| H | -3.05060600 | 1.57994700  | 0.26129600  |
| H | -1.39786800 | -2.13959400 | -0.53184700 |
| H | 0.85261600  | -2.18148000 | -0.43393600 |
| C | -3.30300200 | -0.81668100 | 0.08415400  |
| N | -4.33909300 | -1.32130100 | 0.19568000  |
| N | 2.73459100  | -0.49077700 | 0.01523400  |
| O | 3.48829700  | 0.45993900  | 0.12892300  |
| O | 3.06505600  | -1.59449100 | -0.37747400 |

#### 2-NO<sub>2</sub>-5-NO<sub>2</sub>-substituted

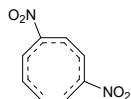

|   |             |             |             |
|---|-------------|-------------|-------------|
| C | 0.54887800  | 2.09979300  | -0.88865200 |
| C | 1.47515100  | 0.96588800  | 1.02017000  |
| C | -0.68520100 | 2.30993900  | -0.32921700 |
| C | -1.68812700 | 1.34664400  | -0.06525700 |
| C | -1.65379400 | -0.03548400 | -0.06492500 |
| C | -0.67488800 | -1.06279700 | -0.19901800 |
| C | 0.69389900  | -1.16256300 | -0.05864200 |
| C | 1.66390200  | -0.23041400 | 0.38616400  |
| H | 0.76589000  | 1.19531200  | -1.43804000 |
| H | 1.22272900  | 2.93479800  | -1.05109600 |
| H | 0.53688800  | 1.15555200  | 1.51573500  |
| H | 2.33051900  | 1.57373100  | 1.28420700  |
| H | -0.92933100 | 3.32146900  | -0.00995300 |
| H | -2.66212000 | 1.74931800  | 0.19029900  |
| H | -1.14602200 | -2.00875800 | -0.44285000 |
| H | 1.11128600  | -2.12282800 | -0.34004700 |
| N | 3.07866800  | -0.56841400 | 0.04051900  |
| N | -3.05671800 | -0.62910500 | 0.07576700  |
| O | 3.32221700  | -1.71157500 | -0.33962100 |
| O | 3.92144500  | 0.31871900  | 0.16373900  |
| O | -3.95364100 | 0.09841000  | 0.49368400  |
| O | -3.22282100 | -1.80580300 | -0.23355100 |

#### 5.3.12 2,6-substituted

##### 2-CH<sub>3</sub>-6-CH<sub>3</sub>-substituted

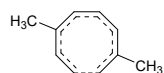

|   |             |             |             |
|---|-------------|-------------|-------------|
| C | 0.09858800  | -1.51247900 | -0.82509600 |
| C | -1.15511800 | -0.87990900 | 0.97564800  |
| C | 1.34197400  | -1.28541200 | -0.29348400 |
| C | 1.89876100  | -0.00595200 | -0.03720500 |
| C | 1.25374400  | 1.22521100  | -0.06108900 |
| C | -0.07548700 | 1.73739300  | -0.19863000 |
| C | -1.38366300 | 1.29207500  | -0.09883000 |
| C | -1.92600200 | 0.05007900  | 0.32301700  |
| H | -0.39260800 | -0.73275200 | -1.39393700 |
| H | -0.23918900 | -2.52892000 | -1.00813400 |
| H | -0.24035400 | -0.56705700 | 1.46223900  |
| H | -1.59005500 | -1.81675200 | 1.31629600  |
| H | -0.03721100 | 2.80448100  | -0.42068000 |
| H | -2.12363100 | 2.03162300  | -0.40727300 |
| C | -3.33920100 | -0.27458700 | -0.09889400 |
| H | -3.72539200 | -1.15059200 | 0.42890600  |
| H | -4.00903200 | 0.56852600  | 0.10315600  |
| H | -3.39157800 | -0.47608700 | -1.17680300 |
| H | 1.95921500  | 2.05292700  | 0.01682600  |
| H | 1.93462300  | -2.14449400 | 0.02267300  |
| C | 3.37968400  | -0.00958300 | 0.29664900  |
| H | 3.96685900  | -0.46164100 | -0.51025300 |
| H | 3.76147800  | 0.99897300  | 0.47223600  |
| H | 3.56718800  | -0.59924500 | 1.20223400  |

2-CH<sub>3</sub>-6-NH<sub>2</sub>-substituted

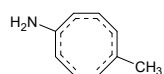

|   |             |             |             |
|---|-------------|-------------|-------------|
| C | 0.11238500  | -1.50293400 | -0.80236600 |
| C | -1.16407400 | -0.89859800 | 0.96459400  |
| C | 1.35698100  | -1.30067200 | -0.26371500 |
| C | 1.91782100  | -0.02099000 | -0.02338800 |
| C | 1.28230000  | 1.22215300  | -0.06774200 |
| C | -0.04191000 | 1.73295600  | -0.17308100 |
| C | -1.35686500 | 1.29453000  | -0.08714200 |
| C | -1.91245900 | 0.05326500  | 0.31291600  |
| H | -0.35406000 | -0.72019400 | -1.38867000 |
| H | -0.24277300 | -2.51382700 | -0.98058100 |
| H | -0.25920300 | -0.60518800 | 1.48048600  |
| H | -1.62313000 | -1.82989200 | 1.28889000  |
| H | -0.00068000 | 2.80196800  | -0.38519100 |
| H | -2.08691300 | 2.04335800  | -0.39523000 |
| C | -3.32399500 | -0.25121300 | -0.13029200 |
| H | -3.73018500 | -1.12428900 | 0.38730800  |
| H | -3.98476500 | 0.60043900  | 0.06566200  |
| H | -3.36269500 | -0.44608200 | -1.21005800 |
| H | 2.00211200  | 2.04146800  | -0.03170100 |
| H | 1.92628300  | -2.15362100 | 0.10330300  |
| N | 3.27617700  | -0.03802000 | 0.35033800  |
| H | 3.85355800  | -0.67397800 | -0.18638900 |
| H | 3.70809700  | 0.87499200  | 0.42109000  |

2-CH<sub>3</sub>-6-OH-substituted

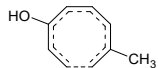

|   |             |             |             |
|---|-------------|-------------|-------------|
| C | 0.15398500  | -1.52597600 | -0.80245000 |
| C | -1.15355600 | -0.88834500 | 0.98120100  |
| C | 1.38968900  | -1.29135400 | -0.26141900 |
| C | 1.90801400  | 0.00381300  | -0.01601000 |
| C | 1.27968700  | 1.23945100  | -0.03683900 |
| C | -0.04555500 | 1.74430500  | -0.17573600 |
| C | -1.35225800 | 1.28918700  | -0.10578500 |
| C | -1.89962900 | 0.04390000  | 0.30563600  |
| H | -0.33438200 | -0.75455300 | -1.38479400 |
| H | -0.18364400 | -2.54483800 | -0.96670000 |
| H | -0.24193700 | -0.58687100 | 1.48088200  |
| H | -1.60641700 | -1.81843600 | 1.31687200  |
| H | -0.00858200 | 2.81221400  | -0.39221300 |
| H | -2.08972400 | 2.02576000  | -0.42562800 |
| C | -3.30768400 | -0.27308300 | -0.13956400 |
| H | -3.69883400 | -1.16126400 | 0.36350100  |
| H | -3.98017500 | 0.56493200  | 0.07459200  |
| H | -3.34723500 | -0.44816300 | -1.22242800 |
| H | 2.01591600  | 2.03803500  | 0.03996800  |
| H | 1.97863500  | -2.13264600 | 0.10537300  |
| O | 3.24564300  | 0.08533600  | 0.30909000  |
| H | 3.69508000  | -0.72825000 | 0.04365400  |

2-CH<sub>3</sub>-6-F-substituted

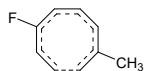

|   |             |             |             |
|---|-------------|-------------|-------------|
| C | 0.15621800  | -1.56433900 | -0.78711900 |
| C | -1.13207900 | -0.86975900 | 0.99018600  |
| C | 1.39735500  | -1.31452800 | -0.26288200 |
| C | 1.87667900  | -0.01244100 | -0.02565200 |
| C | 1.28896500  | 1.23369300  | -0.03066200 |
| C | -0.02861200 | 1.75765500  | -0.18446300 |
| C | -1.33256600 | 1.30044300  | -0.11288100 |
| C | -1.87817200 | 0.05597200  | 0.30553400  |
| H | -0.34272800 | -0.80559400 | -1.37636300 |
| H | -0.17314600 | -2.58794900 | -0.93790900 |
| H | -0.22052500 | -0.56483300 | 1.48809000  |
| H | -1.58579900 | -1.79566400 | 1.33553900  |
| H | 0.01691700  | 2.82400600  | -0.40449200 |
| H | -2.07158600 | 2.03341500  | -0.43747500 |
| C | -3.28319800 | -0.26787300 | -0.14357600 |
| H | -3.67788300 | -1.14724700 | 0.37174000  |
| H | -3.95720200 | 0.57358500  | 0.05088300  |
| H | -3.31462700 | -0.46228300 | -1.22343000 |
| H | 2.04200400  | 2.01413700  | 0.06563700  |
| H | 2.03090200  | -2.12702700 | 0.08408800  |
| F | 3.20734900  | 0.01472400  | 0.27697600  |

2-CH<sub>3</sub>-6-CHO-substituted

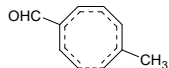

|   |             |             |             |
|---|-------------|-------------|-------------|
| C | 0.35222700  | 1.66914300  | -0.82492300 |
| C | 1.49072300  | 0.77120600  | 1.04216500  |
| C | -0.90071700 | 1.49079600  | -0.31110200 |
| C | -1.53751800 | 0.23467600  | -0.11353800 |
| C | -1.03029800 | -1.05703400 | -0.16075800 |
| C | 0.23935000  | -1.69096900 | -0.29488300 |
| C | 1.57311000  | -1.34867700 | -0.15045100 |
| C | 2.19772400  | -0.17194200 | 0.34493700  |
| H | 0.82597600  | 0.88010900  | -1.39479700 |
| H | 0.76066600  | 2.66861300  | -0.94394300 |
| H | 0.52551000  | 0.52128500  | 1.46450000  |
| H | 1.98514700  | 1.65380300  | 1.44042400  |
| H | 0.11482400  | -2.74270900 | -0.55244100 |
| H | 2.26475600  | -2.12800000 | -0.47302600 |
| C | 3.64654500  | 0.05234300  | -0.01739700 |
| H | 4.07293400  | 0.89251000  | 0.53651300  |
| H | 4.24382700  | -0.83922000 | 0.20294900  |
| H | 3.75785200  | 0.25901700  | -1.08925400 |
| H | -1.83673700 | -1.78943400 | -0.10860300 |
| H | -1.44936400 | 2.36858300  | 0.03239400  |
| C | -2.99892700 | 0.33223900  | 0.18124900  |
| H | -3.37825300 | 1.37022900  | 0.28647900  |
| O | -3.76005500 | -0.60068400 | 0.30337700  |

2-CH<sub>3</sub>-6-CN-substituted

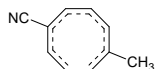

|   |             |             |             |
|---|-------------|-------------|-------------|
| C | -0.16701200 | -1.55421600 | -0.86686500 |
| C | -1.35436700 | -0.84745900 | 1.01747500  |
| C | 1.07764000  | -1.31999000 | -0.35450500 |
| C | 1.61178300  | -0.01924900 | -0.12839600 |
| C | 1.00260200  | 1.23240700  | -0.13498900 |
| C | -0.32199600 | 1.75335800  | -0.23824900 |
| C | -1.62158100 | 1.29922700  | -0.09589100 |
| C | -2.14364400 | 0.05734700  | 0.35669300  |
| H | -0.68304200 | -0.77821500 | -1.41760900 |
| H | -0.51203500 | -2.57259400 | -1.01869100 |
| H | -0.41819300 | -0.52736500 | 1.45749400  |
| H | -1.76937900 | -1.78275700 | 1.38470500  |
| H | -0.28692700 | 2.81851000  | -0.46475100 |
| H | -2.37581100 | 2.03106100  | -0.38728300 |
| C | -3.56756900 | -0.27852100 | -0.01647100 |
| H | -3.92276600 | -1.16481800 | 0.51505000  |
| H | -4.23769400 | 0.55440100  | 0.22249200  |
| H | -3.65816000 | -0.46691900 | -1.09372100 |
| H | 1.73136700  | 2.03914500  | -0.07407200 |
| H | 1.69060700  | -2.15939200 | -0.03418400 |
| C | 3.03114100  | 0.00413000  | 0.15698600  |
| N | 4.16572200  | 0.00667800  | 0.39083600  |

2-CH<sub>3</sub>-6-NO<sub>2</sub>-substituted

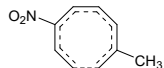

|   |             |             |             |
|---|-------------|-------------|-------------|
| C | -0.53791200 | -1.54638500 | -0.88305600 |
| C | -1.70789000 | -0.84513600 | 1.01499800  |
| C | 0.71004200  | -1.32213200 | -0.37520500 |
| C | 1.22539300  | -0.02036500 | -0.16513900 |
| C | 0.63568700  | 1.22775100  | -0.16157800 |
| C | -0.68821800 | 1.75261100  | -0.24910200 |
| C | -1.98665300 | 1.30016300  | -0.09425600 |
| C | -2.50445100 | 0.05736100  | 0.36007900  |
| H | -1.05503800 | -0.77151800 | -1.43448400 |
| H | -0.89113000 | -2.56347600 | -1.02332100 |
| H | -0.77119500 | -0.52221100 | 1.45180400  |
| H | -2.11602900 | -1.78382300 | 1.38113800  |
| H | -0.65264200 | 2.81732400  | -0.47573100 |
| H | -2.74286200 | 2.03332100  | -0.37719500 |
| C | -3.92951000 | -0.28195500 | -0.00512000 |
| H | -4.28023500 | -1.16732500 | 0.53079400  |
| H | -4.59980400 | 0.55044300  | 0.23501700  |
| H | -4.02530900 | -0.47371100 | -1.08123800 |
| H | 1.37657400  | 2.02053400  | -0.11230800 |
| H | 1.32160900  | -2.15510100 | -0.04780600 |
| N | 2.69984200  | 0.00377900  | 0.11193400  |
| O | 3.26334400  | 1.07804500  | 0.22319600  |
| O | 3.26643500  | -1.07084200 | 0.21681300  |

2- NH<sub>2</sub>-6-CH<sub>3</sub>-substituted

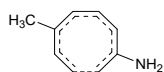

|   |             |             |             |
|---|-------------|-------------|-------------|
| C | 0.12319200  | -1.52323700 | -0.84998200 |
| C | -1.21565700 | -0.90558000 | 0.99464000  |
| C | 1.34883400  | -1.28388200 | -0.29957900 |
| C | 1.88992700  | 0.00724700  | -0.03177900 |
| C | 1.23606600  | 1.22759500  | -0.04212300 |
| C | -0.10341400 | 1.72714600  | -0.18915200 |
| C | -1.40382300 | 1.28310100  | -0.09475600 |
| C | -1.94785600 | 0.02228400  | 0.30449400  |
| H | -0.39686500 | -0.74689700 | -1.39733400 |
| H | -0.21344500 | -2.54123200 | -1.02576200 |
| H | -0.31626500 | -0.59214700 | 1.50543700  |
| H | -1.65586400 | -1.85512600 | 1.28870500  |
| H | -0.07222800 | 2.79575300  | -0.40506600 |
| H | -2.14927600 | 2.02651800  | -0.37990600 |
| H | 1.92828300  | 2.06366200  | 0.05767100  |
| H | 1.94933200  | -2.13515900 | 0.02213000  |
| N | -3.22711200 | -0.29941000 | -0.17698100 |
| H | -3.80732300 | -0.82521900 | 0.46478800  |
| H | -3.73549500 | 0.47364400  | -0.58726100 |
| C | 3.37103000  | 0.01483300  | 0.29745100  |
| H | 3.95893800  | -0.41323700 | -0.52218900 |
| H | 3.74217800  | 1.02336400  | 0.49484600  |
| H | 3.56801400  | -0.59509300 | 1.18752200  |

2- NH<sub>2</sub>-6-NH<sub>2</sub>-substituted

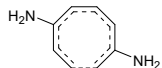

|   |             |             |             |
|---|-------------|-------------|-------------|
| C | 0.13885900  | -1.51067100 | -0.82985100 |
| C | -1.23021900 | -0.92542000 | 0.98421300  |
| C | 1.36280600  | -1.29858400 | -0.26785400 |
| C | 1.91051200  | -0.00633500 | -0.01868900 |
| C | 1.26630300  | 1.22644600  | -0.05172500 |
| C | -0.06913700 | 1.72335000  | -0.16047800 |
| C | -1.37588000 | 1.28704000  | -0.07839200 |
| C | -1.93501400 | 0.02476800  | 0.29331400  |
| H | -0.35387900 | -0.72765100 | -1.39375500 |
| H | -0.22134700 | -2.52137000 | -0.99763300 |
| H | -0.34132400 | -0.63295500 | 1.52487400  |
| H | -1.69371800 | -1.87079800 | 1.25541900  |
| H | -0.03588900 | 2.79485300  | -0.36126600 |
| H | -2.11220000 | 2.04279500  | -0.35288700 |
| H | 1.97400500  | 2.05476200  | 0.00179800  |
| H | 1.93456800  | -2.14456800 | 0.11089400  |
| N | -3.20923400 | -0.27574400 | -0.21266600 |
| H | -3.80637400 | -0.80352900 | 0.41168400  |
| H | -3.70037400 | 0.50681800  | -0.62571600 |
| N | 3.26670500  | -0.01719100 | 0.34962600  |
| H | 3.84397100  | -0.66637300 | -0.17076100 |
| H | 3.70088200  | 0.89499900  | 0.41539800  |

#### 2- NH<sub>2</sub>-6-OH-substituted

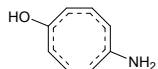

|   |             |             |             |
|---|-------------|-------------|-------------|
| C | 0.15068600  | -1.53280700 | -0.82957300 |
| C | -1.21008200 | -0.90920100 | 0.99666200  |
| C | 1.38054500  | -1.31511100 | -0.28331200 |
| C | 1.90100300  | -0.01991800 | -0.02469000 |
| C | 1.27668600  | 1.21672700  | -0.04439500 |
| C | -0.05349400 | 1.72639600  | -0.17761700 |
| C | -1.35788500 | 1.29124600  | -0.09149800 |
| C | -1.91650900 | 0.03174500  | 0.29649600  |
| H | -0.35558200 | -0.75237100 | -1.38402500 |
| H | -0.20415200 | -2.54558500 | -0.99551700 |
| H | -0.31412000 | -0.61347700 | 1.52357500  |
| H | -1.67242000 | -1.85029900 | 1.28367500  |
| H | -0.01236400 | 2.79495300  | -0.39041900 |
| H | -2.09457500 | 2.04326500  | -0.37478300 |
| H | 1.99531400  | 2.03620000  | 0.02254000  |
| H | 1.99041900  | -2.14593500 | 0.06213900  |
| N | -3.19115600 | -0.27204600 | -0.20318800 |
| H | -3.78416300 | -0.80480000 | 0.42073300  |
| H | -3.68737700 | 0.50624900  | -0.61795200 |
| O | 3.23935800  | -0.06308800 | 0.27965100  |
| H | 3.53654700  | 0.80636900  | 0.58271100  |

#### 2- NH<sub>2</sub>-6-F-substituted

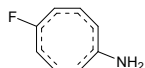



|   |             |             |             |
|---|-------------|-------------|-------------|
| C | 0.18163800  | -1.57911000 | -0.81040900 |
| C | -1.19200300 | -0.88569300 | 1.01982500  |
| C | 1.40356200  | -1.31255700 | -0.26866300 |
| C | 1.86546200  | 0.00216800  | -0.02316800 |
| C | 1.26829300  | 1.23717200  | -0.01518700 |
| C | -0.06027000 | 1.75024500  | -0.17517000 |
| C | -1.35525100 | 1.29467600  | -0.10632300 |
| C | -1.89952000 | 0.02848800  | 0.28953800  |
| H | -0.35327000 | -0.82516300 | -1.37377700 |
| H | -0.14492400 | -2.60517000 | -0.94994400 |
| H | -0.29708500 | -0.57242400 | 1.53903400  |
| H | -1.64424200 | -1.82669700 | 1.32222400  |
| H | -0.02155300 | 2.81787500  | -0.39017400 |
| H | -2.10169400 | 2.03122300  | -0.40495000 |
| H | 2.00939900  | 2.02600500  | 0.09879900  |
| H | 2.04519300  | -2.11450300 | 0.08728000  |
| N | -3.15917500 | -0.30070400 | -0.22922900 |
| H | -3.75021000 | -0.84931500 | 0.38273700  |
| H | -3.66653200 | 0.46619200  | -0.65169500 |
| F | 3.19640800  | 0.03828600  | 0.27582400  |

#### 2- NH<sub>2</sub>-6-CHO-substituted

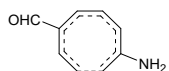

|   |             |             |             |
|---|-------------|-------------|-------------|
| C | 0.33998300  | 1.69093800  | -0.84528600 |
| C | 1.54224300  | 0.76524600  | 1.08285800  |
| C | -0.90087000 | 1.49885000  | -0.32342000 |
| C | -1.52648700 | 0.23155700  | -0.11512100 |
| C | -1.01446800 | -1.05205300 | -0.14684600 |
| C | 0.26357000  | -1.68197600 | -0.29676300 |
| C | 1.59016800  | -1.34673600 | -0.15492900 |
| C | 2.21817600  | -0.15648700 | 0.33588800  |
| H | 0.84986300  | 0.90349100  | -1.38531700 |
| H | 0.74500600  | 2.69275300  | -0.95587200 |
| H | 0.58642600  | 0.50200200  | 1.51433300  |
| H | 2.03739000  | 1.65755000  | 1.45637900  |
| H | 0.13916000  | -2.73254900 | -0.55929700 |
| H | 2.28407400  | -2.12892300 | -0.46535100 |
| H | -1.81206500 | -1.79150700 | -0.06975900 |
| H | -1.46039700 | 2.37049000  | 0.01751300  |
| N | 3.53007200  | 0.09063200  | -0.09447100 |
| H | 4.12353600  | 0.55673400  | 0.58041500  |
| H | 4.00022700  | -0.69992900 | -0.51681200 |
| C | -2.99097700 | 0.32022100  | 0.17666700  |
| H | -3.37985800 | 1.35604700  | 0.26525300  |
| O | -3.74398500 | -0.61724200 | 0.31268900  |

#### 2-NH<sub>2</sub>-6-CN-substituted

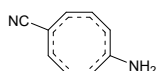

|   |             |             |             |
|---|-------------|-------------|-------------|
| C | -0.14625600 | -1.57386500 | -0.89301100 |
| C | -1.41115900 | -0.85371700 | 1.05845000  |
| C | 1.08235500  | -1.32511000 | -0.36698600 |
| C | 1.60063600  | -0.01286800 | -0.12630600 |
| C | 0.98510400  | 1.22843700  | -0.11740900 |

|   |             |             |             |
|---|-------------|-------------|-------------|
| C | -0.34928800 | 1.74185200  | -0.23784200 |
| C | -1.64081100 | 1.29246000  | -0.09857600 |
| C | -2.16519000 | 0.03489800  | 0.34617500  |
| H | -0.69915100 | -0.80268800 | -1.41399700 |
| H | -0.48696500 | -2.59482900 | -1.03680300 |
| H | -0.48485900 | -0.52421600 | 1.50845800  |
| H | -1.82744200 | -1.79822300 | 1.39825900  |
| H | -0.31686700 | 2.80643700  | -0.46749000 |
| H | -2.39911100 | 2.02596500  | -0.37463500 |
| H | 1.70258300  | 2.04227800  | -0.02899800 |
| H | 1.70649500  | -2.15596700 | -0.04669100 |
| C | 3.02056700  | 0.02158800  | 0.15829200  |
| N | 4.15510300  | 0.03094200  | 0.39211000  |
| N | -3.44971300 | -0.30585000 | -0.09599000 |
| H | -4.00404500 | -0.84750400 | 0.55511600  |
| H | -3.98410800 | 0.45106400  | -0.50278700 |

### 2-NH<sub>2</sub>-6-NO<sub>2</sub>-substituted

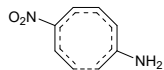

|   |             |             |             |
|---|-------------|-------------|-------------|
| C | -0.51786000 | -1.57205700 | -0.89990300 |
| C | -1.76606000 | -0.84536800 | 1.06210200  |
| C | 0.71464200  | -1.33403000 | -0.37870600 |
| C | 1.21541900  | -0.02050900 | -0.16238700 |
| C | 0.61993900  | 1.21759400  | -0.15157100 |
| C | -0.71339900 | 1.73645900  | -0.25865000 |
| C | -2.00449800 | 1.29215100  | -0.10406900 |
| C | -2.52665200 | 0.03681700  | 0.34913800  |
| H | -1.06783800 | -0.80262500 | -1.42686200 |
| H | -0.87131700 | -2.59096000 | -1.02526000 |
| H | -0.83860200 | -0.51063600 | 1.50578800  |
| H | -2.17611400 | -1.79048500 | 1.40761700  |
| H | -0.67849700 | 2.79918800  | -0.49457000 |
| H | -2.76335500 | 2.02693400  | -0.37528000 |
| H | 1.35120700  | 2.01725300  | -0.08086700 |
| H | 1.33330700  | -2.15859200 | -0.04461900 |
| N | -3.81261600 | -0.30730300 | -0.08352700 |
| H | -4.36364100 | -0.84706900 | 0.57183000  |
| H | -4.34981900 | 0.44464100  | -0.49564400 |
| N | 2.69298300  | 0.01823200  | 0.11273900  |
| O | 3.24271400  | 1.09682000  | 0.24945500  |
| O | 3.27390000  | -1.05063100 | 0.19025100  |

### 2-OH-6-CH<sub>3</sub>-substituted

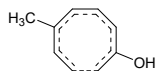

|   |             |             |             |
|---|-------------|-------------|-------------|
| C | 0.10965200  | -1.51642500 | -0.85857800 |
| C | -1.21300600 | -0.93387300 | 0.93157600  |
| C | 1.34178100  | -1.27914100 | -0.30741900 |
| C | 1.87374700  | 0.00540700  | -0.02254000 |
| C | 1.21809700  | 1.23072300  | -0.04449100 |
| C | -0.11301700 | 1.73089800  | -0.20814200 |
| C | -1.41732500 | 1.28297700  | -0.12672600 |
| C | -1.94010300 | 0.03391100  | 0.28901900  |
| H | -0.39046100 | -0.73974400 | -1.42399800 |
| H | -0.21002700 | -2.53551400 | -1.05915300 |

|   |             |             |             |
|---|-------------|-------------|-------------|
| H | -0.31560000 | -0.63925800 | 1.45624400  |
| H | -1.67763700 | -1.86917800 | 1.23664300  |
| H | -0.08113700 | 2.79859900  | -0.42693100 |
| H | -2.17980700 | 1.99675400  | -0.43097300 |
| H | 1.91271000  | 2.06447500  | 0.05750400  |
| H | 1.94330300  | -2.13312200 | 0.00466200  |
| O | -3.23070700 | -0.18258500 | -0.12513800 |
| H | -3.60275700 | -0.93664600 | 0.35307500  |
| C | 3.34859800  | 0.01692300  | 0.33634300  |
| H | 3.95545300  | -0.39676100 | -0.47663200 |
| H | 3.70952900  | 1.02492500  | 0.55362800  |
| H | 3.53153700  | -0.60223900 | 1.22278500  |

#### 2-OH-6-NH<sub>2</sub>-substituted

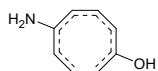

|   |             |             |             |
|---|-------------|-------------|-------------|
| C | 0.12713200  | -1.50413600 | -0.84146600 |
| C | -1.22636900 | -0.95229800 | 0.91855200  |
| C | 1.35730400  | -1.29446300 | -0.27796100 |
| C | 1.89504800  | -0.00899000 | -0.00722000 |
| C | 1.24887000  | 1.22887300  | -0.05319000 |
| C | -0.07789700 | 1.72611400  | -0.18432500 |
| C | -1.38909200 | 1.28604800  | -0.11614700 |
| C | -1.92740100 | 0.03790800  | 0.27688600  |
| H | -0.34747900 | -0.72037500 | -1.41996300 |
| H | -0.21262300 | -2.51676500 | -1.03895000 |
| H | -0.33893300 | -0.67998400 | 1.47137500  |
| H | -1.71620400 | -1.88118000 | 1.20363900  |
| H | -0.04357600 | 2.79603000  | -0.39167400 |
| H | -2.14150100 | 2.01143300  | -0.41631600 |
| H | 1.95882400  | 2.05488700  | 0.00524300  |
| H | 1.93083300  | -2.14486800 | 0.08780900  |
| O | -3.21616500 | -0.15851300 | -0.15306600 |
| H | -3.60056100 | -0.91347300 | 0.31394000  |
| N | 3.24132500  | -0.01292000 | 0.39366700  |
| H | 3.83505600  | -0.66201100 | -0.10757200 |
| H | 3.67064000  | 0.90052300  | 0.47054100  |

#### 2-OH-6-OH-substituted

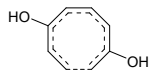

|   |             |             |             |
|---|-------------|-------------|-------------|
| C | 0.13900800  | -1.52536400 | -0.84005400 |
| C | -1.20689900 | -0.93877700 | 0.92958300  |
| C | 1.37427600  | -1.31024100 | -0.29015900 |
| C | 1.88547400  | -0.02189800 | -0.01256600 |
| C | 1.25945900  | 1.21976700  | -0.04598800 |
| C | -0.06214300 | 1.72928200  | -0.19905400 |
| C | -1.37078800 | 1.28984600  | -0.12732200 |
| C | -1.90872600 | 0.04374400  | 0.27926600  |
| H | -0.34624100 | -0.74472400 | -1.41305300 |
| H | -0.19748500 | -2.53975500 | -1.03331900 |
| H | -0.31315100 | -0.66327200 | 1.47034000  |
| H | -1.69545600 | -1.86377800 | 1.22851000  |

|   |             |             |             |
|---|-------------|-------------|-------------|
| H | -0.02036500 | 2.79648400  | -0.41700900 |
| H | -2.12404700 | 2.01160000  | -0.43394000 |
| H | 1.98070900  | 2.03674300  | 0.02265600  |
| H | 1.98426500  | -2.14432000 | 0.04694000  |
| O | -3.19716600 | -0.15385600 | -0.14723200 |
| H | -3.58176400 | -0.90845800 | 0.32036200  |
| O | 3.21663200  | -0.05924200 | 0.32190600  |
| H | 3.49984400  | 0.80611000  | 0.64888900  |

#### 2-OH-6-F-substituted

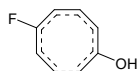

|   |             |             |             |
|---|-------------|-------------|-------------|
| C | 0.17064800  | -1.56850300 | -0.82195600 |
| C | -1.18939800 | -0.92090100 | 0.94949800  |
| C | 1.39772200  | -1.30643900 | -0.27478100 |
| C | 1.85144600  | 0.00101700  | -0.01056800 |
| C | 1.25137800  | 1.24054700  | -0.01368000 |
| C | -0.06879400 | 1.75190200  | -0.19407300 |
| C | -1.36751100 | 1.29128800  | -0.14132500 |
| C | -1.89250000 | 0.03815800  | 0.27091400  |
| H | -0.33892000 | -0.81344300 | -1.40707600 |
| H | -0.13992100 | -2.59560900 | -0.98885200 |
| H | -0.29616200 | -0.62930400 | 1.48330800  |
| H | -1.66885400 | -1.84629100 | 1.26090600  |
| H | -0.03027200 | 2.81879100  | -0.41153500 |
| H | -2.12994900 | 1.99763700  | -0.46155300 |
| H | 1.99301900  | 2.02800800  | 0.10655300  |
| H | 2.03821600  | -2.11254800 | 0.07349100  |
| O | -3.16973400 | -0.18085600 | -0.17538300 |
| H | -3.55318200 | -0.93859400 | 0.28830500  |
| F | 3.17399400  | 0.04175400  | 0.31948300  |

#### 2-OH-6-CHO-substituted

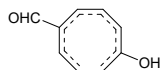

|   |             |             |             |
|---|-------------|-------------|-------------|
| C | 0.35789700  | 1.67790600  | -0.85078700 |
| C | 1.54290000  | 0.80656300  | 1.01417400  |
| C | -0.89286600 | 1.49339500  | -0.33392200 |
| C | -1.51362900 | 0.23269100  | -0.11546800 |
| C | -1.00242100 | -1.05651100 | -0.15864700 |
| C | 0.26881600  | -1.68529700 | -0.31559800 |
| C | 1.59993500  | -1.34680000 | -0.18115400 |
| C | 2.20743400  | -0.16716600 | 0.32214600  |
| H | 0.84120900  | 0.89190700  | -1.41692300 |
| H | 0.75532100  | 2.68064400  | -0.98029700 |
| H | 0.58772800  | 0.56818500  | 1.46034700  |
| H | 2.06448200  | 1.68186400  | 1.39428000  |
| H | 0.14554700  | -2.73570900 | -0.57826300 |
| H | 2.31441600  | -2.10215100 | -0.50178100 |
| H | -1.80293900 | -1.79308400 | -0.08523100 |
| H | -1.44977500 | 2.36893200  | 0.00100800  |
| O | 3.52317200  | -0.04005100 | -0.04036800 |
| H | 3.94448000  | 0.65368600  | 0.48625700  |
| C | -2.97411900 | 0.32281200  | 0.19806700  |

|   |             |             |            |
|---|-------------|-------------|------------|
| H | -3.36160100 | 1.35887200  | 0.28937200 |
| O | -3.72349200 | -0.61478700 | 0.34766400 |

2-OH-6-CN-substituted

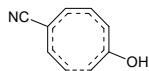

|   |             |             |             |
|---|-------------|-------------|-------------|
| C | -0.16358300 | -1.56208800 | -0.90052500 |
| C | -1.40634600 | -0.89624500 | 0.98638200  |
| C | 1.07524100  | -1.31786800 | -0.38009400 |
| C | 1.58753600  | -0.01292700 | -0.12688300 |
| C | 0.97001800  | 1.23352200  | -0.12582100 |
| C | -0.35802200 | 1.74523900  | -0.25162800 |
| C | -1.65333000 | 1.29049000  | -0.12115300 |
| C | -2.15593000 | 0.04282400  | 0.33324800  |
| H | -0.69333700 | -0.79017300 | -1.44408300 |
| H | -0.49189300 | -2.58376600 | -1.06749400 |
| H | -0.48046600 | -0.58961200 | 1.45236200  |
| H | -1.84777100 | -1.82846100 | 1.33096900  |
| H | -0.32802200 | 2.81007100  | -0.47938000 |
| H | -2.43074300 | 1.99535400  | -0.40806800 |
| H | 1.68994400  | 2.04546600  | -0.04029700 |
| H | 1.69904900  | -2.15248900 | -0.06931000 |
| C | 3.00308300  | 0.02169600  | 0.17986700  |
| N | 4.13361400  | 0.03219800  | 0.43160200  |
| O | -3.45367500 | -0.18344300 | -0.03909000 |
| H | -3.81466300 | -0.93209800 | 0.45645800  |

2-OH-6-NO<sub>2</sub>-substituted

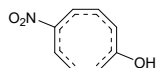

|   |             |             |             |
|---|-------------|-------------|-------------|
| C | -0.53626600 | -1.55078300 | -0.92596200 |
| C | -1.75637100 | -0.89885500 | 0.97959000  |
| C | 0.70790300  | -1.32166100 | -0.41170000 |
| C | 1.20356600  | -0.01804300 | -0.16989400 |
| C | 0.60758200  | 1.22547400  | -0.15218700 |
| C | -0.71991200 | 1.74346300  | -0.25681200 |
| C | -2.01449700 | 1.29193900  | -0.11299200 |
| C | -2.51391900 | 0.04201200  | 0.33863000  |
| H | -1.06639000 | -0.77581000 | -1.46492600 |
| H | -0.87483600 | -2.56991200 | -1.08707600 |
| H | -0.82800300 | -0.59266100 | 1.44085000  |
| H | -2.19140100 | -1.83519600 | 1.32101300  |
| H | -0.68814800 | 2.80880200  | -0.48016900 |
| H | -2.79328300 | 2.00059200  | -0.38680000 |
| H | 1.34145600  | 2.02237600  | -0.07761100 |
| H | 1.32908200  | -2.15260300 | -0.09875000 |
| O | -3.81396500 | -0.18302200 | -0.02431700 |
| H | -4.17195400 | -0.93349700 | 0.47073600  |
| N | 2.67775300  | 0.01547900  | 0.12895900  |
| O | 3.24441000  | -1.05526000 | 0.26198700  |
| O | 3.23589100  | 1.09306600  | 0.22832800  |

2-F-6-CH<sub>3</sub>-substituted

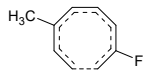

|   |             |             |             |
|---|-------------|-------------|-------------|
| C | 0.10703300  | -1.52183000 | -0.87122700 |
| C | -1.22235000 | -0.97959300 | 0.92277500  |
| C | 1.33248200  | -1.26985600 | -0.30922400 |
| C | 1.85716200  | 0.01566100  | -0.02204400 |
| C | 1.19966400  | 1.24197200  | -0.05310200 |
| C | -0.12955500 | 1.73596200  | -0.21587800 |
| C | -1.42939900 | 1.26781700  | -0.13170800 |
| C | -1.91193700 | 0.02025700  | 0.30252300  |
| H | -0.39640900 | -0.74941300 | -1.43917900 |
| H | -0.19812700 | -2.54407800 | -1.07659700 |
| H | -0.31907600 | -0.72226100 | 1.45571600  |
| H | -1.73883200 | -1.89335600 | 1.19792200  |
| H | -0.10919200 | 2.80330100  | -0.43587600 |
| H | -2.20749800 | 1.96378800  | -0.43643700 |
| H | 1.89358300  | 2.07691000  | 0.04247000  |
| H | 1.93887400  | -2.11944100 | 0.00573100  |
| F | -3.19863800 | -0.23827400 | -0.05600500 |
| C | 3.32875100  | 0.03187300  | 0.35044800  |
| H | 3.94255000  | -0.40145800 | -0.44660400 |
| H | 3.68986000  | 1.04362900  | 0.54856400  |
| H | 3.50089500  | -0.56671700 | 1.25296200  |

#### 2-F-6-NH<sub>2</sub>-substituted

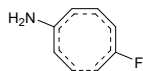

|   |             |             |             |
|---|-------------|-------------|-------------|
| C | 0.12240000  | -1.50738600 | -0.85177000 |
| C | -1.23886000 | -1.00311700 | 0.90306100  |
| C | 1.34785400  | -1.28512000 | -0.27879600 |
| C | 1.88035900  | -0.00011300 | -0.00578400 |
| C | 1.23260800  | 1.24017200  | -0.06227900 |
| C | -0.09147100 | 1.73074700  | -0.19008200 |
| C | -1.39954500 | 1.27055800  | -0.11867300 |
| C | -1.89958000 | 0.02380200  | 0.28990500  |
| H | -0.35278300 | -0.72738000 | -1.43453600 |
| H | -0.20275500 | -2.52309500 | -1.05642700 |
| H | -0.34869600 | -0.77332400 | 1.46935200  |
| H | -1.78374300 | -1.90712800 | 1.15481400  |
| H | -0.06909600 | 2.80061400  | -0.39734300 |
| H | -2.16692200 | 1.97967200  | -0.41858300 |
| H | 1.94232300  | 2.06674900  | -0.01227000 |
| H | 1.92527200  | -2.13281200 | 0.08743900  |
| F | -3.18739000 | -0.20902800 | -0.08490300 |
| N | 3.22102700  | 0.00253200  | 0.40611000  |
| H | 3.82392500  | -0.65254100 | -0.07543000 |
| H | 3.64920600  | 0.91551200  | 0.49084400  |

#### 2-F-6-OH-substituted

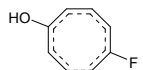

|   |             |             |             |
|---|-------------|-------------|-------------|
| C | 0.16472100  | -1.53195900 | -0.84911000 |
| C | -1.22357700 | -0.98840300 | 0.92606900  |
| C | 1.38026200  | -1.27468500 | -0.27466700 |
| C | 1.86791200  | 0.02607000  | 0.00212900  |
| C | 1.22580800  | 1.25714300  | -0.02638500 |
| C | -0.09915900 | 1.74266800  | -0.19101200 |
| C | -1.39752000 | 1.26474700  | -0.13901900 |
| C | -1.88654300 | 0.01366900  | 0.28285900  |
| H | -0.33408900 | -0.76613100 | -1.42980700 |
| H | -0.14180400 | -2.55636900 | -1.03693300 |
| H | -0.32536800 | -0.74213100 | 1.47290100  |
| H | -1.75728700 | -1.89423400 | 1.19390300  |
| H | -0.08051500 | 2.81138800  | -0.40261600 |
| H | -2.17253400 | 1.95917200  | -0.45359000 |
| H | 1.95051300  | 2.06354800  | 0.06962600  |
| H | 1.97967000  | -2.10866200 | 0.09148400  |
| F | -3.16652500 | -0.23858700 | -0.10182700 |
| O | 3.19142100  | 0.12684800  | 0.36141600  |
| H | 3.65734500  | -0.68957600 | 0.13495300  |

#### 2-F-6-F-substituted

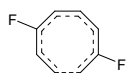

|   |             |             |             |
|---|-------------|-------------|-------------|
| C | 0.16954800  | -1.57351900 | -0.83431800 |
| C | -1.19718700 | -0.96705800 | 0.93787900  |
| C | 1.38983400  | -1.29618300 | -0.27652000 |
| C | 1.83474600  | 0.01182300  | -0.00773100 |
| C | 1.23188700  | 1.25260000  | -0.01868900 |
| C | -0.08596500 | 1.75678900  | -0.20240000 |
| C | -1.38017200 | 1.27476800  | -0.15009200 |
| C | -1.86427000 | 0.02406700  | 0.28255400  |
| H | -0.34247000 | -0.82349500 | -1.42326900 |
| H | -0.12570400 | -2.60395600 | -1.00673500 |
| H | -0.29864500 | -0.71218000 | 1.48041300  |
| H | -1.72800100 | -1.87071800 | 1.21844600  |
| H | -0.05914700 | 2.82354400  | -0.42051700 |
| H | -2.15794900 | 1.96207000  | -0.47379600 |
| H | 1.97211300  | 2.04156500  | 0.10012900  |
| H | 2.03634600  | -2.09716300 | 0.07285900  |
| F | -3.13999200 | -0.23841800 | -0.10502500 |
| F | 3.15254000  | 0.05848500  | 0.33484400  |

#### 2-F-6-CHO-substituted

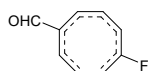

|   |             |             |             |
|---|-------------|-------------|-------------|
| C | 0.36474000  | 1.68483000  | -0.86327800 |
| C | 1.56211500  | 0.85005200  | 1.00902000  |
| C | -0.87987000 | 1.48838400  | -0.33411900 |
| C | -1.49824100 | 0.22772700  | -0.11446000 |
| C | -0.99134100 | -1.06414700 | -0.16633800 |
| C | 0.27707100  | -1.69147400 | -0.32306100 |
| C | 1.60586500  | -1.33730100 | -0.18445100 |
| C | 2.17772700  | -0.15860600 | 0.33538800  |

|   |             |             |             |
|---|-------------|-------------|-------------|
| H | 0.84912000  | 0.90233700  | -1.43297300 |
| H | 0.75229300  | 2.69068100  | -0.99603900 |
| H | 0.60264900  | 0.65884500  | 1.46696200  |
| H | 2.14243300  | 1.69840400  | 1.35626000  |
| H | 0.16161500  | -2.74180100 | -0.58819500 |
| H | 2.33501000  | -2.07830900 | -0.50482700 |
| H | -1.79432400 | -1.79866200 | -0.09935200 |
| H | -1.43813000 | 2.36123500  | 0.00594900  |
| F | 3.49156600  | 0.00236400  | 0.03115300  |
| C | -2.95848900 | 0.31789600  | 0.20697300  |
| H | -3.34493800 | 1.35303600  | 0.30870600  |
| O | -3.70591000 | -0.62140100 | 0.35113500  |

#### 2-F-6-CN-substituted

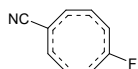

|   |             |             |             |
|---|-------------|-------------|-------------|
| C | -0.16856000 | -1.57009100 | -0.91050100 |
| C | -1.42023100 | -0.94404600 | 0.97788000  |
| C | 1.06382000  | -1.31154600 | -0.37898400 |
| C | 1.57181200  | -0.00590000 | -0.12694500 |
| C | 0.95539300  | 1.24287400  | -0.13413600 |
| C | -0.37027100 | 1.75101800  | -0.25664900 |
| C | -1.66151700 | 1.27832600  | -0.12318000 |
| C | -2.12608200 | 0.03311000  | 0.34573700  |
| H | -0.70030100 | -0.80395400 | -1.45996400 |
| H | -0.48398700 | -2.59521800 | -1.07962600 |
| H | -0.48843000 | -0.68352400 | 1.45849300  |
| H | -1.92242600 | -1.85460800 | 1.28775700  |
| H | -0.35016800 | 2.81564700  | -0.48478100 |
| H | -2.45329400 | 1.96663400  | -0.40983200 |
| H | 1.67654900  | 2.05450300  | -0.05698900 |
| H | 1.69076400  | -2.14211800 | -0.06315600 |
| C | 2.98636200  | 0.03069700  | 0.18493500  |
| N | 4.11605000  | 0.04451100  | 0.43951400  |
| F | -3.41838000 | -0.23284400 | 0.02917300  |

#### 2-F-6-NO<sub>2</sub>-substituted

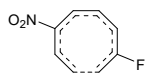

|   |             |             |             |
|---|-------------|-------------|-------------|
| C | 0.54134400  | 1.54962700  | -0.95569400 |
| C | 1.76840400  | 0.95679300  | 0.96041400  |
| C | -0.69647900 | 1.31229300  | -0.42728500 |
| C | -1.18911200 | 0.01118600  | -0.17252100 |
| C | -0.59676400 | -1.23531700 | -0.14917400 |
| C | 0.72802700  | -1.75223600 | -0.24451300 |
| C | 2.01857900  | -1.28236300 | -0.10139400 |
| C | 2.48076600  | -0.03047400 | 0.35219800  |
| H | 1.07406900  | 0.77405200  | -1.49088400 |
| H | 0.86683100  | 2.57042000  | -1.13120800 |
| H | 0.83211300  | 0.70533600  | 1.43705700  |
| H | 2.26655400  | 1.87369500  | 1.25794800  |
| H | 0.70522900  | -2.81966800 | -0.45715400 |
| H | 2.81155300  | -1.97804300 | -0.36641600 |
| H | -1.33321500 | -2.02999100 | -0.07501100 |



|   |             |             |             |
|---|-------------|-------------|-------------|
| H | -1.32085900 | 2.14256700  | -0.11791500 |
| F | 3.77609800  | 0.22891000  | 0.04492900  |
| N | -2.66309100 | -0.01885500 | 0.13360000  |
| O | -3.23130100 | -1.09394200 | 0.18523600  |
| O | -3.21546200 | 1.05098900  | 0.31874400  |

2-CHO-6-CH<sub>3</sub>-substituted

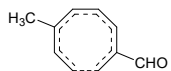

|   |             |             |             |
|---|-------------|-------------|-------------|
| C | 0.26585800  | -1.42614700 | -0.92933500 |
| C | -0.97821400 | -0.71119900 | 0.96309000  |
| C | 1.48310400  | -1.33407500 | -0.32334900 |
| C | 2.18024900  | -0.12345300 | -0.02054500 |
| C | 1.68698900  | 1.16740000  | -0.03860200 |
| C | 0.42246900  | 1.82727200  | -0.21963400 |
| C | -0.91558100 | 1.52050700  | -0.11326700 |
| C | -1.57902400 | 0.33417300  | 0.31425900  |
| H | -0.15090400 | -0.57596400 | -1.45498900 |
| H | -0.17782500 | -2.39563800 | -1.13609600 |
| H | -0.02882500 | -0.57096500 | 1.46096000  |
| H | -1.57134000 | -1.58300400 | 1.22669100  |
| H | 0.58062600  | 2.87704300  | -0.46724300 |
| H | -1.58336500 | 2.32783900  | -0.41648200 |
| C | -3.00895000 | 0.19839300  | -0.06734500 |
| H | 2.47531100  | 1.91069600  | 0.08263000  |
| H | 1.96499400  | -2.25609000 | 0.00438700  |
| C | 3.63807800  | -0.31409700 | 0.35256100  |
| H | -3.47775100 | 1.11709500  | -0.47793100 |
| O | -3.65580900 | -0.82008700 | 0.03874900  |
| H | 4.18866400  | -0.81824100 | -0.44910500 |
| H | 4.13297900  | 0.63685400  | 0.56221300  |
| H | 3.72404800  | -0.94157800 | 1.24797200  |

2-CHO-6-NH<sub>2</sub>-substituted

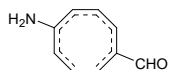

|   |             |             |             |
|---|-------------|-------------|-------------|
| C | 0.29141000  | -1.42054400 | -0.90750000 |
| C | -0.99606700 | -0.73406700 | 0.96450800  |
| C | 1.51119700  | -1.35186300 | -0.30634000 |
| C | 2.20632300  | -0.13879000 | -0.01363600 |
| C | 1.71404100  | 1.16197300  | -0.05495100 |
| C | 0.45244900  | 1.81219300  | -0.19857000 |
| C | -0.89241300 | 1.50887000  | -0.10089600 |
| C | -1.56830900 | 0.32762700  | 0.31471200  |
| H | -0.10948100 | -0.56319600 | -1.43416400 |
| H | -0.16924300 | -2.38223000 | -1.11102900 |
| H | -0.05022800 | -0.61772600 | 1.47457000  |
| H | -1.61152400 | -1.59280000 | 1.21968100  |
| H | 0.60729500  | 2.86501400  | -0.43536200 |
| H | -1.55117600 | 2.32337900  | -0.40279600 |
| C | -2.99881300 | 0.21843100  | -0.08021500 |
| H | 2.52223500  | 1.89237400  | 0.00052600  |
| H | 1.97752200  | -2.27508800 | 0.03777900  |
| H | -3.44662700 | 1.14689900  | -0.49218900 |

|   |             |             |            |
|---|-------------|-------------|------------|
| O | -3.66533000 | -0.78834100 | 0.01437200 |
| N | 3.57009400  | -0.27809800 | 0.27718200 |
| H | 3.89265200  | -1.22266900 | 0.43790300 |
| H | 3.95165200  | 0.37648100  | 0.94715100 |

2-CHO-6-OH-substituted

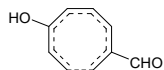

|   |             |             |             |
|---|-------------|-------------|-------------|
| C | 0.27705200  | -1.44534400 | -0.88438000 |
| C | -0.97219000 | -0.71800500 | 0.96327600  |
| C | 1.50648700  | -1.37707500 | -0.29928000 |
| C | 2.18706900  | -0.16184800 | -0.01355500 |
| C | 1.72862600  | 1.14427400  | -0.04200300 |
| C | 0.47769900  | 1.81564800  | -0.20648100 |
| C | -0.86668800 | 1.52009000  | -0.10928100 |
| C | -1.54641300 | 0.34300400  | 0.31153200  |
| H | -0.11994700 | -0.59479900 | -1.42430500 |
| H | -0.18436200 | -2.40815800 | -1.08064800 |
| H | -0.03157600 | -0.59636600 | 1.48183800  |
| H | -1.58927700 | -1.57382700 | 1.22431600  |
| H | 0.64695700  | 2.86419300  | -0.45044800 |
| H | -1.52162800 | 2.33519000  | -0.41797300 |
| C | -2.97615700 | 0.23240300  | -0.08433800 |
| H | 2.54516400  | 1.86475300  | 0.04223100  |
| H | 2.00440800  | -2.28117000 | 0.04359200  |
| H | -3.42605300 | 1.16084900  | -0.49383300 |
| O | -3.63923900 | -0.77654100 | 0.00818200  |
| O | 3.49837500  | -0.38826100 | 0.32026700  |
| H | 3.91031700  | 0.42887000  | 0.63468800  |

2-CHO-6-F-substituted

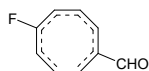

|   |             |             |             |
|---|-------------|-------------|-------------|
| C | 0.29466200  | -1.49763900 | -0.87042300 |
| C | -0.95913300 | -0.68948700 | 0.98455400  |
| C | 1.52032500  | -1.38474500 | -0.28548500 |
| C | 2.15181800  | -0.14611400 | -0.01199200 |
| C | 1.72741200  | 1.15808200  | -0.01500100 |
| C | 0.48334900  | 1.83858400  | -0.20982000 |
| C | -0.85606800 | 1.53107200  | -0.12741800 |
| C | -1.53068900 | 0.35194000  | 0.30419500  |
| H | -0.13080900 | -0.66861200 | -1.42093200 |
| H | -0.14540900 | -2.47523500 | -1.03994100 |
| H | -0.01310600 | -0.56022700 | 1.49213900  |
| H | -1.57428100 | -1.54212300 | 1.25992600  |
| H | 0.65692500  | 2.88499400  | -0.45753200 |
| H | -1.51705300 | 2.33597500  | -0.45036700 |
| C | -2.95806700 | 0.22433800  | -0.10015300 |
| H | 2.56503000  | 1.84123500  | 0.11671500  |
| H | 2.04782800  | -2.26698000 | 0.06977900  |
| H | -3.41464700 | 1.14317100  | -0.52315100 |
| O | -3.60981800 | -0.79043800 | 0.00078900  |
| F | 3.46249000  | -0.29832100 | 0.32625700  |

2-CHO-6-CHO-substituted

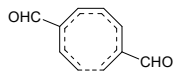

|   |             |             |             |
|---|-------------|-------------|-------------|
| C | -0.13367700 | -1.57340100 | -0.96417700 |
| C | -1.28338100 | -0.63427700 | 1.01832700  |
| C | 1.08246100  | -1.47943500 | -0.36780300 |
| C | 1.81159500  | -0.27276100 | -0.11303400 |
| C | 1.41654400  | 1.04893100  | -0.14905200 |
| C | 0.19807400  | 1.78070100  | -0.33232400 |
| C | -1.14611800 | 1.53114600  | -0.18462800 |
| C | -1.84592600 | 0.39172700  | 0.31596500  |
| H | -0.56706500 | -0.72966300 | -1.48593300 |
| H | -0.60262600 | -2.54053400 | -1.11830000 |
| H | -0.29901600 | -0.53437400 | 1.45557300  |
| H | -1.90802400 | -1.46384900 | 1.33941700  |
| H | 0.40410200  | 2.81233800  | -0.61561400 |
| H | -1.79094600 | 2.35201300  | -0.50151000 |
| C | -3.29538200 | 0.30068800  | -0.01753700 |
| H | 2.27309600  | 1.71678000  | -0.04614000 |
| H | 1.55302900  | -2.39911600 | -0.01736800 |
| C | 3.25221800  | -0.49453300 | 0.22951900  |
| H | -3.73883500 | 1.21537100  | -0.46254500 |
| O | -3.97596400 | -0.68264200 | 0.16421700  |
| H | 3.54578100  | -1.56047100 | 0.32230200  |
| O | 4.07497100  | 0.37499000  | 0.40060700  |

2-CHO-6-CN-substituted

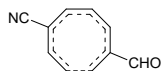

|   |             |             |             |
|---|-------------|-------------|-------------|
| C | 0.02666800  | -1.43556200 | -0.99257200 |
| C | -1.16301200 | -0.69263200 | 0.99173100  |
| C | 1.24401400  | -1.31279200 | -0.40202200 |
| C | 1.89592700  | -0.06627600 | -0.11991800 |
| C | 1.41543100  | 1.23192400  | -0.10863100 |
| C | 0.14251400  | 1.87590400  | -0.25049600 |
| C | -1.18128400 | 1.52983800  | -0.10755100 |
| C | -1.79924700 | 0.32485700  | 0.33788200  |
| H | -0.43307100 | -0.59625700 | -1.49865300 |
| H | -0.40004800 | -2.41647100 | -1.17757500 |
| H | -0.19767800 | -0.53732400 | 1.45451300  |
| H | -1.72814200 | -1.57804600 | 1.27133300  |
| H | 0.27506900  | 2.92950300  | -0.49241300 |
| H | -1.88026000 | 2.31830100  | -0.38945300 |
| C | -3.23717400 | 0.14455900  | -0.01010700 |
| H | 2.21176100  | 1.96636300  | 0.00138500  |
| H | 1.76814900  | -2.20881700 | -0.07625100 |
| C | 3.30249900  | -0.19336100 | 0.19895400  |
| N | 4.42530400  | -0.31303200 | 0.45646800  |
| H | -3.74681900 | 1.04653500  | -0.40708500 |
| O | -3.84051200 | -0.89641400 | 0.11191300  |

2-CHO-6-NO<sub>2</sub>-substituted

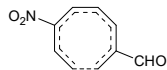

|   |             |             |             |
|---|-------------|-------------|-------------|
| C | -0.33899800 | -1.39924500 | -1.03029700 |
| C | -1.51668600 | -0.69170100 | 0.98055600  |
| C | 0.88013800  | -1.28362000 | -0.44271800 |
| C | 1.50338700  | -0.03064600 | -0.16803400 |
| C | 1.03242800  | 1.25759900  | -0.13167000 |
| C | -0.24506400 | 1.89790500  | -0.24894800 |
| C | -1.56391300 | 1.54174000  | -0.09352000 |
| C | -2.16778500 | 0.32597100  | 0.34284400  |
| H | -0.80534800 | -0.55817000 | -1.52769800 |
| H | -0.76806200 | -2.37933500 | -1.21377200 |
| H | -0.54979800 | -0.53343100 | 1.43918600  |
| H | -2.06978200 | -1.58757000 | 1.25097700  |
| H | -0.12007300 | 2.95444700  | -0.48014100 |
| H | -2.27156400 | 2.32932600  | -0.35573600 |
| C | -3.60683400 | 0.13563500  | 0.00384900  |
| H | 1.83698700  | 1.98039800  | -0.02738700 |
| H | 1.40992800  | -2.17211200 | -0.11723800 |
| H | -4.12916200 | 1.03762100  | -0.37594100 |
| O | -4.19748500 | -0.91345800 | 0.11635200  |
| N | 2.96867000  | -0.14857700 | 0.14281100  |
| O | 3.63710900  | 0.86566200  | 0.22188800  |
| O | 3.41364400  | -1.27132500 | 0.30372300  |

2-CN-6-CH<sub>3</sub>-substituted

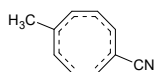

|   |             |             |             |
|---|-------------|-------------|-------------|
| C | 0.29120100  | -1.50218300 | -0.85119900 |
| C | -0.92663600 | -0.83561000 | 1.01237800  |
| C | 1.52807400  | -1.30773700 | -0.30365500 |
| C | 2.13348400  | -0.04395500 | -0.04621900 |
| C | 1.53650900  | 1.20607400  | -0.07084900 |
| C | 0.22380400  | 1.76502200  | -0.22153500 |
| C | -1.09249700 | 1.37183400  | -0.09528200 |
| C | -1.64583500 | 0.14675800  | 0.37645700  |
| H | -0.19558500 | -0.70305500 | -1.39648700 |
| H | -0.07764800 | -2.50775600 | -1.03196100 |
| H | 0.01188100  | -0.57261600 | 1.48049600  |
| H | -1.41183700 | -1.74938000 | 1.34078000  |
| H | 0.29702400  | 2.82227500  | -0.47591800 |
| H | -1.82365200 | 2.11813700  | -0.39776500 |
| C | -3.02789300 | -0.11503700 | 0.05153100  |
| H | 2.26900500  | 2.00919100  | 0.01080300  |
| H | 2.09436800  | -2.18390300 | 0.01388000  |
| C | 3.61300000  | -0.10734600 | 0.28314900  |
| N | -4.13620400 | -0.32797700 | -0.21014100 |
| H | 3.77785100  | -0.70565700 | 1.18723400  |
| H | 4.17703600  | -0.58280600 | -0.52645900 |
| H | 4.03572100  | 0.88449100  | 0.45772900  |

2-CN-6-NH<sub>2</sub>-substituted

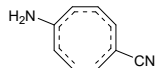

|   |             |             |             |
|---|-------------|-------------|-------------|
| C | 0.30473400  | -1.49069100 | -0.82258000 |
| C | -0.93459100 | -0.86339900 | 0.99995500  |
| C | 1.54678200  | -1.32208200 | -0.27716400 |
| C | 2.15512600  | -0.05864600 | -0.03702000 |
| C | 1.56276900  | 1.20371100  | -0.08281100 |
| C | 0.25542300  | 1.75718500  | -0.19098300 |
| C | -1.06874500 | 1.36702500  | -0.07760200 |
| C | -1.63280900 | 0.14293100  | 0.37132100  |
| H | -0.15739300 | -0.68744900 | -1.38392400 |
| H | -0.08152900 | -2.48985800 | -1.00005500 |
| H | -0.00775900 | -0.61947900 | 1.50012600  |
| H | -1.44397600 | -1.76986200 | 1.31166000  |
| H | 0.32724100  | 2.81852500  | -0.42817500 |
| H | -1.79086800 | 2.12248000  | -0.37733700 |
| C | -3.01629900 | -0.09892200 | 0.03178900  |
| H | 2.30862200  | 1.99899800  | -0.05116800 |
| H | 2.09380100  | -2.19297100 | 0.08182600  |
| N | -4.12468000 | -0.29774600 | -0.24076900 |
| N | 3.50665500  | -0.12530200 | 0.33069100  |
| H | 4.06058200  | -0.80652400 | -0.17334300 |
| H | 3.98311400  | 0.76480000  | 0.40150900  |

#### 2-CN-6-OH-substituted

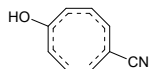

|   |             |             |             |
|---|-------------|-------------|-------------|
| C | 0.33742400  | -1.51792600 | -0.81950800 |
| C | -0.92614900 | -0.84275200 | 1.02405600  |
| C | 1.57302400  | -1.31915600 | -0.27395600 |
| C | 2.14380600  | -0.04067000 | -0.03088100 |
| C | 1.56335400  | 1.21612700  | -0.05187300 |
| C | 0.25702500  | 1.76965600  | -0.19570500 |
| C | -1.06128800 | 1.36843000  | -0.09653900 |
| C | -1.62056600 | 0.14373400  | 0.36788600  |
| H | -0.14643200 | -0.72552700 | -1.37697900 |
| H | -0.03394100 | -2.52503000 | -0.98159300 |
| H | 0.01057600  | -0.59356200 | 1.50335400  |
| H | -1.43176500 | -1.74570900 | 1.35138000  |
| H | 0.32983500  | 2.82900300  | -0.43998100 |
| H | -1.78877000 | 2.11304900  | -0.41030400 |
| C | -3.00114200 | -0.11026500 | 0.02452100  |
| H | 2.32828300  | 1.98729700  | 0.02193200  |
| H | 2.13892500  | -2.18014200 | 0.08338200  |
| N | -4.10637300 | -0.31846200 | -0.25279400 |
| O | 3.48036300  | -0.01125400 | 0.28725200  |
| H | 3.90206200  | -0.84317100 | 0.03234700  |

#### 2-CN-6-F-substituted

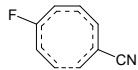

|   |             |             |             |
|---|-------------|-------------|-------------|
| C | 0.33550100  | -1.55809900 | -0.80367300 |
| C | -0.90291700 | -0.82558600 | 1.03139200  |
| C | 1.57734900  | -1.34289800 | -0.27563900 |
| C | 2.10912000  | -0.05552800 | -0.04013200 |
| C | 1.57180700  | 1.21014300  | -0.04492400 |
| C | 0.27337000  | 1.78288300  | -0.20626800 |
| C | -1.04158000 | 1.37965700  | -0.10346300 |
| C | -1.59883800 | 0.15559200  | 0.36849200  |
| H | -0.15955300 | -0.77834800 | -1.36830600 |
| H | -0.02600300 | -2.57069200 | -0.95326500 |
| H | 0.03347700  | -0.57324700 | 1.50987700  |
| H | -1.40890500 | -1.72505600 | 1.36755200  |
| H | 0.35493200  | 2.83958200  | -0.45705900 |
| H | -1.77138300 | 2.12027100  | -0.42178300 |
| C | -2.97783600 | -0.10258600 | 0.02391200  |
| H | 2.35289400  | 1.96249000  | 0.05032900  |
| H | 2.18912600  | -2.17511400 | 0.06428100  |
| N | -4.08200700 | -0.31327500 | -0.25525500 |
| F | 3.43706700  | -0.08538000 | 0.25522000  |

#### 2-CN-6-CHO-substituted

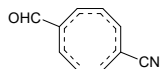

|   |             |             |             |
|---|-------------|-------------|-------------|
| C | 0.06980800  | -1.44491400 | -0.92379900 |
| C | -1.12091300 | -0.83182300 | 1.00983900  |
| C | 1.28881400  | -1.15068600 | -0.38683700 |
| C | 1.77531700  | 0.16478400  | -0.13845600 |
| C | 1.11993900  | 1.38496600  | -0.11676300 |
| C | -0.22112500 | 1.87312400  | -0.21187900 |
| C | -1.49529800 | 1.36831400  | -0.06043200 |
| C | -1.93169100 | 0.09098400  | 0.39664800  |
| H | -0.49993900 | -0.68704100 | -1.44725400 |
| H | -0.21954400 | -2.47739900 | -1.09786300 |
| H | -0.19238500 | -0.49954800 | 1.45389600  |
| H | -1.51749400 | -1.78792400 | 1.33612300  |
| H | -0.22960600 | 2.93949000  | -0.43309600 |
| H | -2.29504600 | 2.05746100  | -0.32288200 |
| C | -3.29380500 | -0.27844900 | 0.09307900  |
| H | 1.81884000  | 2.22001600  | -0.03404000 |
| H | 1.95245500  | -1.95703500 | -0.07990200 |
| C | 3.23507700  | 0.25035200  | 0.17184600  |
| N | -4.38656600 | -0.57081400 | -0.15540800 |
| H | 3.63411300  | 1.27844200  | 0.29173600  |
| O | 3.96222700  | -0.70633500 | 0.30270800  |

#### 2-CN-6-CN-substituted

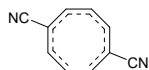

|   |             |             |             |
|---|-------------|-------------|-------------|
| C | 0.03125100  | -1.53127300 | -0.89685500 |
| C | -1.12237500 | -0.80580000 | 1.04414100  |
| C | 1.26917600  | -1.32484800 | -0.36592600 |
| C | 1.84439900  | -0.03687900 | -0.13428300 |
| C | 1.27781000  | 1.22975100  | -0.14111100 |
| C | -0.03325800 | 1.79045400  | -0.26000500 |

|   |             |             |             |
|---|-------------|-------------|-------------|
| C | -1.33877800 | 1.38022900  | -0.09662000 |
| C | -1.86394900 | 0.15070500  | 0.39962400  |
| H | -0.48006800 | -0.73779100 | -1.42712800 |
| H | -0.33755500 | -2.54055800 | -1.05192300 |
| H | -0.16737200 | -0.53168500 | 1.47212500  |
| H | -1.58471100 | -1.72260900 | 1.39588500  |
| H | 0.03060000  | 2.84698100  | -0.51595700 |
| H | -2.08794900 | 2.11503100  | -0.38303200 |
| C | -3.24913100 | -0.13226400 | 0.10597800  |
| H | 2.02880600  | 2.01506100  | -0.07263600 |
| H | 1.86013900  | -2.17989500 | -0.04514700 |
| C | 3.26343100  | -0.06184600 | 0.15345000  |
| N | 4.39646200  | -0.09873600 | 0.38948700  |
| N | -4.35836900 | -0.36039500 | -0.13556400 |

2-CN-6-NO<sub>2</sub>-substituted

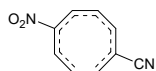

|   |             |             |             |
|---|-------------|-------------|-------------|
| C | -0.34451200 | -1.50618000 | -0.93572200 |
| C | -1.48447400 | -0.81505300 | 1.02805800  |
| C | 0.89571900  | -1.31315600 | -0.40548400 |
| C | 1.44748800  | -0.02498200 | -0.17259700 |
| C | 0.89909700  | 1.23600300  | -0.15026000 |
| C | -0.41239300 | 1.80058800  | -0.24699900 |
| C | -1.71508700 | 1.38686000  | -0.07702800 |
| C | -2.23378100 | 0.14774000  | 0.40282400  |
| H | -0.85899900 | -0.70773300 | -1.45547900 |
| H | -0.71772800 | -2.51315500 | -1.09472400 |
| H | -0.52893100 | -0.54406100 | 1.45684600  |
| H | -1.93978400 | -1.74087900 | 1.36511800  |
| H | -0.34961200 | 2.86046800  | -0.48738500 |
| H | -2.46781400 | 2.12579000  | -0.34300500 |
| C | -3.61924800 | -0.13583600 | 0.11157900  |
| H | 1.66223900  | 2.00626800  | -0.08049100 |
| H | 1.48909900  | -2.16374200 | -0.08901200 |
| N | -4.72876500 | -0.36390100 | -0.12852500 |
| N | 2.92429600  | -0.04922300 | 0.11076400  |
| O | 3.53056300  | 1.00448400  | 0.15853300  |
| O | 3.43768100  | -1.14035900 | 0.28224500  |

2-NO<sub>2</sub>-6-CH<sub>3</sub>-substituted

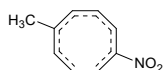

|   |             |             |             |
|---|-------------|-------------|-------------|
| C | 0.64060700  | -1.45148900 | -0.92375100 |
| C | -0.57631400 | -0.86410400 | 0.97445300  |
| C | 1.86967900  | -1.28322700 | -0.35421100 |
| C | 2.48306300  | -0.03224000 | -0.04549000 |
| C | 1.89503300  | 1.22044200  | -0.02037200 |
| C | 0.58523700  | 1.79504700  | -0.15018800 |
| C | -0.73121900 | 1.40581800  | -0.03117900 |
| C | -1.25859200 | 0.16141900  | 0.38992500  |
| H | 0.16071900  | -0.62742300 | -1.43806800 |
| H | 0.26330600  | -2.44663300 | -1.14071800 |
| H | 0.35780100  | -0.63313200 | 1.46650000  |

|   |             |             |             |
|---|-------------|-------------|-------------|
| H | -1.08412100 | -1.78688900 | 1.22935500  |
| H | 0.66528600  | 2.86049800  | -0.36375000 |
| H | -1.47191200 | 2.15613700  | -0.28742000 |
| H | 2.63235000  | 2.01462600  | 0.09641200  |
| H | 2.42737000  | -2.17354500 | -0.06165500 |
| C | 3.96128300  | -0.11975900 | 0.28333100  |
| N | -2.67375800 | -0.09882700 | 0.03430700  |
| O | -3.07084800 | -1.25067000 | 0.09456400  |
| O | -3.36426000 | 0.85029500  | -0.29371700 |
| H | 4.39134900  | 0.86182800  | 0.49401200  |
| H | 4.11958000  | -0.75178200 | 1.16540600  |
| H | 4.52278600  | -0.57034000 | -0.54211300 |

#### 2-NO<sub>2</sub>-6-NH<sub>2</sub>-substituted

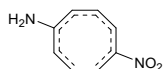

|   |             |             |             |
|---|-------------|-------------|-------------|
| C | 0.65037600  | -1.44841100 | -0.87772700 |
| C | -0.58000200 | -0.88133000 | 0.97246600  |
| C | 1.88747000  | -1.30197600 | -0.31826100 |
| C | 2.50346400  | -0.04825700 | -0.03843500 |
| C | 1.91829700  | 1.21714800  | -0.04166400 |
| C | 0.61365200  | 1.78342200  | -0.13000100 |
| C | -0.71095400 | 1.39837300  | -0.01974500 |
| C | -1.24724100 | 0.15865900  | 0.38894700  |
| H | 0.19465400  | -0.62371000 | -1.41329800 |
| H | 0.25350700  | -2.43829700 | -1.08175600 |
| H | 0.34195000  | -0.65789200 | 1.49035900  |
| H | -1.10341600 | -1.79677000 | 1.22145200  |
| H | 0.69179000  | 2.85122000  | -0.33220800 |
| H | -1.44328200 | 2.15620600  | -0.27599900 |
| H | 2.66862100  | 2.00648800  | 0.01818000  |
| H | 2.42777400  | -2.18575300 | 0.01886400  |
| N | -2.66354400 | -0.08766800 | 0.01999800  |
| O | -3.06356400 | -1.24005700 | 0.04653200  |
| O | -3.35108600 | 0.87086500  | -0.28511700 |
| N | 3.85415900  | -0.13619300 | 0.32565300  |
| H | 4.40444400  | -0.80411000 | -0.19970200 |
| H | 4.33647000  | 0.74740800  | 0.42974800  |

#### 2-NO<sub>2</sub>-6-OH-substituted

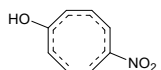

|   |             |             |             |
|---|-------------|-------------|-------------|
| C | 0.65905700  | -1.47026400 | -0.87885500 |
| C | -0.56579900 | -0.87464600 | 0.97494000  |
| C | 1.90176300  | -1.31836400 | -0.33335800 |
| C | 2.49088300  | -0.06042200 | -0.04076000 |
| C | 1.92691200  | 1.20686200  | -0.02630600 |
| C | 0.62770800  | 1.78564100  | -0.14169400 |
| C | -0.69446200 | 1.40068600  | -0.03156800 |
| C | -1.23136300 | 0.16283800  | 0.38667600  |
| H | 0.19309500  | -0.64775900 | -1.40798800 |
| H | 0.26882400  | -2.46239800 | -1.08413900 |
| H | 0.36047500  | -0.65362200 | 1.48578300  |
| H | -1.09203000 | -1.78631800 | 1.23203900  |



|   |             |             |             |
|---|-------------|-------------|-------------|
| H | 0.71343200  | 2.85104700  | -0.35168400 |
| H | -1.42738800 | 2.15589600  | -0.29413400 |
| H | 2.68700200  | 1.98653300  | 0.05519100  |
| H | 2.48005000  | -2.18708800 | -0.02771200 |
| N | -2.64969600 | -0.08232500 | 0.02317100  |
| O | -3.05230100 | -1.23297300 | 0.06085800  |
| O | -3.33399900 | 0.87640800  | -0.28805300 |
| O | 3.82315900  | -0.18490600 | 0.25335500  |
| H | 4.18134900  | 0.65777000  | 0.56671700  |

2-NO<sub>2</sub>-6-F-substituted

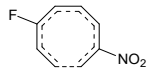

|   |             |             |             |
|---|-------------|-------------|-------------|
| C | 0.67823900  | -1.51766700 | -0.86697800 |
| C | -0.55473500 | -0.85083700 | 1.00094700  |
| C | 1.91461100  | -1.32102800 | -0.32272000 |
| C | 2.45262400  | -0.04326900 | -0.04139400 |
| C | 1.92312700  | 1.22381100  | 0.00138000  |
| C | 0.62754700  | 1.81162100  | -0.13735500 |
| C | -0.68771200 | 1.41255200  | -0.03952200 |
| C | -1.21648800 | 0.17043500  | 0.38677600  |
| H | 0.18512900  | -0.71789800 | -1.40519700 |
| H | 0.31062900  | -2.52327400 | -1.04575400 |
| H | 0.37718600  | -0.62528700 | 1.50016500  |
| H | -1.07978700 | -1.76007800 | 1.26915000  |
| H | 0.71492300  | 2.87591800  | -0.34981000 |
| H | -1.42855600 | 2.15647700  | -0.31303500 |
| H | 2.70845600  | 1.96741000  | 0.12564100  |
| H | 2.52173900  | -2.16576700 | -0.00582100 |
| N | -2.63098200 | -0.08964800 | 0.01371200  |
| O | -3.02386200 | -1.24277100 | 0.06055900  |
| O | -3.31807600 | 0.86083600  | -0.31415000 |
| F | 3.77993100  | -0.09313200 | 0.25228800  |

2-NO<sub>2</sub>-6-CHO-substituted

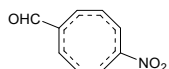

|   |             |             |             |
|---|-------------|-------------|-------------|
| C | -0.23876000 | 1.62358000  | -0.95201500 |
| C | 0.89083200  | 0.81828600  | 1.02399600  |
| C | -1.47029300 | 1.46862100  | -0.39429300 |
| C | -2.12516900 | 0.22620800  | -0.12952400 |
| C | -1.64421100 | -1.06940700 | -0.11704600 |
| C | -0.38157700 | -1.73172700 | -0.24610000 |
| C | 0.94710200  | -1.40775100 | -0.09233100 |
| C | 1.52304900  | -0.20496800 | 0.39118800  |
| H | 0.24439200  | 0.80168500  | -1.46567100 |
| H | 0.17500700  | 2.61400300  | -1.11643300 |
| H | -0.08229900 | 0.63233100  | 1.45689600  |
| H | 1.44030200  | 1.70082300  | 1.33010600  |
| H | -0.52035800 | -2.78406100 | -0.48974000 |
| H | 1.66019000  | -2.18061000 | -0.36128500 |
| H | -2.45988600 | -1.78639900 | -0.01558200 |
| H | -2.00770800 | 2.36450900  | -0.08058300 |
| C | -3.58763700 | 0.36141100  | 0.17178000  |

|   |             |             |             |
|---|-------------|-------------|-------------|
| N | 2.96044900  | -0.00310100 | 0.07549800  |
| O | 3.41250900  | 1.12144000  | 0.20133500  |
| O | 3.60351100  | -0.97093300 | -0.28865500 |
| H | -3.95294900 | 1.40713900  | 0.22975400  |
| O | -4.35350100 | -0.55716100 | 0.34358500  |

2-NO<sub>2</sub>-6-CN-substituted

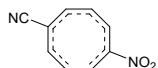

|   |             |             |             |
|---|-------------|-------------|-------------|
| C | 0.39095600  | -1.47810200 | -0.97492100 |
| C | -0.76913300 | -0.83855600 | 0.99623200  |
| C | 1.62023800  | -1.29458000 | -0.41913000 |
| C | 2.20238600  | -0.01839100 | -0.13344100 |
| C | 1.64584000  | 1.25083300  | -0.08935400 |
| C | 0.33863800  | 1.82672600  | -0.18830100 |
| C | -0.96733700 | 1.41735400  | -0.03813800 |
| C | -1.46719000 | 0.16708300  | 0.40135300  |
| H | -0.11377300 | -0.66281900 | -1.47853200 |
| H | 0.01667400  | -2.47911600 | -1.16623500 |
| H | 0.18034700  | -0.60246300 | 1.45664700  |
| H | -1.26324400 | -1.76408700 | 1.26887700  |
| H | 0.40950200  | 2.89213700  | -0.40069800 |
| H | -1.72579800 | 2.15493200  | -0.28047100 |
| H | 2.40224900  | 2.02676000  | 0.01534800  |
| H | 2.20295200  | -2.16347600 | -0.12098100 |
| C | 3.62034800  | -0.06546000 | 0.15710700  |
| N | 4.75245900  | -0.12015600 | 0.39391500  |
| N | -2.88781300 | -0.11419400 | 0.07217300  |
| O | -3.26322700 | -1.27103500 | 0.14311800  |
| O | -3.59301200 | 0.82567800  | -0.24624500 |

2-NO<sub>2</sub>-6-NO<sub>2</sub>-substituted

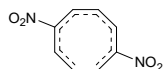

|   |             |             |             |
|---|-------------|-------------|-------------|
| C | 0.01588600  | -1.45446500 | -1.01034200 |
| C | -1.13033300 | -0.84298700 | 0.98125900  |
| C | 1.24730800  | -1.28399000 | -0.45538900 |
| C | 1.80644600  | -0.00675300 | -0.17327600 |
| C | 1.26914300  | 1.25604000  | -0.10433700 |
| C | -0.03803900 | 1.83600400  | -0.18221900 |
| C | -1.34137000 | 1.42396700  | -0.02469800 |
| C | -1.83539700 | 0.16668500  | 0.40239500  |
| H | -0.49091400 | -0.63501400 | -1.50523400 |
| H | -0.36379700 | -2.45306300 | -1.20327900 |
| H | -0.17941200 | -0.61047500 | 1.44054900  |
| H | -1.61875200 | -1.77486200 | 1.24260200  |
| H | 0.03266400  | 2.90343600  | -0.38236900 |
| H | -2.10280300 | 2.16400700  | -0.24980800 |
| H | 2.03870900  | 2.01630600  | -0.00283200 |
| H | 1.83168600  | -2.14774900 | -0.15788600 |
| N | -3.25659900 | -0.11528700 | 0.07707400  |
| O | -3.62826300 | -1.27367000 | 0.13886700  |
| O | -3.96508800 | 0.82599100  | -0.22939600 |
| N | 3.28253200  | -0.05261500 | 0.11432200  |

|   |            |             |            |
|---|------------|-------------|------------|
| O | 3.90207700 | 0.99265900  | 0.16973400 |
| O | 3.77992600 | -1.15176400 | 0.28056100 |

### 5.3.13 2,7-substituted

#### 2-CH<sub>3</sub>-7-CH<sub>3</sub>-substituted

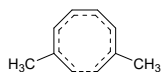

|   |             |             |             |
|---|-------------|-------------|-------------|
| C | 0.71268100  | -0.99031200 | -0.90480900 |
| C | -0.71267800 | -0.99031300 | 0.90480300  |
| C | 1.77579800  | -0.37900100 | -0.29067100 |
| C | 1.74992400  | 1.00544200  | 0.02934100  |
| C | 0.71300600  | 1.92096900  | 0.06738100  |
| C | -0.71300400 | 1.92096900  | -0.06738100 |
| C | -1.74992300 | 1.00544200  | -0.02934000 |
| C | -1.77579700 | -0.37900200 | 0.29066800  |
| H | -0.01735000 | -0.39177500 | -1.43577600 |
| H | 0.75921400  | -2.04468900 | -1.16770500 |
| H | 0.01735200  | -0.39177600 | 1.43577100  |
| H | -0.75921100 | -2.04469000 | 1.16769900  |
| H | 2.71867100  | 1.42720800  | 0.30085300  |
| H | -1.07839900 | 2.93740000  | -0.21599100 |
| H | -2.71866900 | 1.42720900  | -0.30085200 |
| C | -2.95914000 | -1.18416800 | -0.19168500 |
| H | -2.98372000 | -2.17643700 | 0.26671800  |
| H | -3.89979700 | -0.67538400 | 0.04658000  |
| H | -2.93019300 | -1.31388200 | -1.28133300 |
| H | 1.07840100  | 2.93740000  | 0.21599500  |
| C | 2.95913500  | -1.18417100 | 0.19169000  |
| H | 3.89979900  | -0.67542500 | -0.04663200 |
| H | 2.93021700  | -1.31382400 | 1.28134600  |
| H | 2.98367300  | -2.17646600 | -0.26665800 |

#### 2-CH<sub>3</sub>-7-NH<sub>2</sub>-substituted

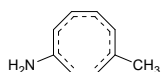

|   |             |             |             |
|---|-------------|-------------|-------------|
| C | -0.74587600 | -1.04120700 | 0.92016400  |
| C | 0.74637300  | -0.97979900 | -0.92469100 |
| C | -1.78394400 | -0.43357600 | 0.26845300  |
| C | -1.78370000 | 0.96473100  | -0.03154100 |
| C | -0.76432800 | 1.88989100  | -0.06054900 |
| C | 0.66491800  | 1.92221400  | 0.08881100  |
| C | 1.71903600  | 1.03340100  | 0.04021000  |
| C | 1.78288900  | -0.35106800 | -0.29528000 |
| H | -0.04270400 | -0.43381900 | 1.47363300  |
| H | -0.77519000 | -2.10478400 | 1.14315200  |
| H | -0.01546400 | -0.40491700 | -1.43644900 |
| H | 0.80904800  | -2.03429300 | -1.18344500 |
| H | -2.76292300 | 1.37246900  | -0.28615600 |
| H | 1.00160300  | 2.94440100  | 0.26172900  |
| H | 2.67747800  | 1.47621400  | 0.31646600  |
| C | 2.98735800  | -1.12544400 | 0.18644500  |
| H | 3.02398500  | -2.12407300 | -0.25735100 |
| H | 3.91609300  | -0.60469500 | -0.07339900 |

|   |             |             |             |
|---|-------------|-------------|-------------|
| H | 2.97632900  | -1.23949500 | 1.27809800  |
| H | -1.14954700 | 2.89993100  | -0.20262700 |
| N | -2.83268700 | -1.20111200 | -0.26791800 |
| H | -3.60577000 | -0.66319900 | -0.63893600 |
| H | -3.16048900 | -1.95081200 | 0.32858100  |

2-CH<sub>3</sub>-7-OH-substituted

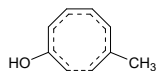

|   |             |             |             |
|---|-------------|-------------|-------------|
| C | 0.72491500  | -1.10158100 | -0.88866800 |
| C | -0.76121200 | -0.96457800 | 0.93932800  |
| C | 1.76447300  | -0.47311800 | -0.26819300 |
| C | 1.80856600  | 0.91727600  | 0.02864100  |
| C | 0.81145800  | 1.86986000  | 0.05929700  |
| C | -0.61350000 | 1.93101600  | -0.08719600 |
| C | -1.68535400 | 1.05985100  | -0.04728200 |
| C | -1.77979000 | -0.31902900 | 0.29389200  |
| H | 0.01590700  | -0.51003500 | -1.45070000 |
| H | 0.78732000  | -2.16551100 | -1.09434600 |
| H | -0.00197200 | -0.39383400 | 1.45935900  |
| H | -0.84996100 | -2.01363200 | 1.21101100  |
| H | 2.80415800  | 1.29788400  | 0.26238100  |
| H | -0.93088900 | 2.95967200  | -0.25723600 |
| H | -2.63196900 | 1.51983800  | -0.33545100 |
| C | -2.99123600 | -1.07501400 | -0.19865200 |
| H | -3.05849300 | -2.06556300 | 0.25897800  |
| H | -3.91269600 | -0.52971700 | 0.03449200  |
| H | -2.96055000 | -1.20606300 | -1.28796500 |
| H | 1.22211000  | 2.87059200  | 0.19328500  |
| O | 2.81439100  | -1.25600100 | 0.15025500  |
| H | 3.33199400  | -0.78373100 | 0.81714600  |

2-CH<sub>3</sub>-7-F-substituted

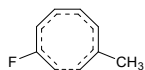

|   |             |             |             |
|---|-------------|-------------|-------------|
| C | -0.70407900 | -1.13500300 | 0.83847500  |
| C | 0.76291300  | -0.95553900 | -0.94329500 |
| C | -1.74316600 | -0.47191100 | 0.25790600  |
| C | -1.82780600 | 0.89471800  | -0.06987600 |
| C | -0.84507400 | 1.86707500  | -0.07321700 |
| C | 0.57106300  | 1.93612100  | 0.10604700  |
| C | 1.65280400  | 1.07103300  | 0.07756800  |
| C | 1.77053600  | -0.29685700 | -0.28489300 |
| H | 0.00844700  | -0.56479400 | 1.41730500  |
| H | -0.79039900 | -2.19894100 | 1.03363300  |
| H | 0.00634300  | -0.39075000 | -1.47363800 |
| H | 0.88403600  | -1.99523200 | -1.23794300 |
| H | -2.82572600 | 1.22234600  | -0.35243200 |
| H | 0.88037600  | 2.96489000  | 0.29004800  |
| H | 2.58796500  | 1.53509600  | 0.39436900  |
| C | 2.99214100  | -1.04177400 | 0.19990200  |
| H | 3.08029500  | -2.02119000 | -0.27735100 |
| H | 3.90485900  | -0.47532400 | -0.01526500 |
| H | 2.95644700  | -1.19556000 | 1.28614800  |

|   |             |             |             |
|---|-------------|-------------|-------------|
| H | -1.26478000 | 2.86221800  | -0.21733000 |
| F | -2.80042900 | -1.21666000 | -0.16658200 |

2-CH<sub>3</sub>-7-CHO-substituted

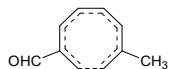

|   |             |             |             |
|---|-------------|-------------|-------------|
| C | -0.69410100 | -0.69807700 | 0.92725600  |
| C | 0.75108600  | -0.99850200 | -0.99082300 |
| C | -1.51828700 | 0.19783100  | 0.30673300  |
| C | -1.16875500 | 1.53996200  | -0.03872800 |
| C | 0.04594700  | 2.17803000  | -0.09440100 |
| C | 1.43051600  | 1.82202400  | 0.09054100  |
| C | 2.19533700  | 0.68134900  | 0.05155700  |
| C | 1.87907900  | -0.67313900 | -0.30077700 |
| H | 0.18982400  | -0.36537400 | 1.45514900  |
| H | -1.05872200 | -1.70354200 | 1.12253100  |
| H | 0.16710000  | -0.22867100 | -1.47998300 |
| H | 0.53937600  | -2.02848000 | -1.26624100 |
| H | -2.01708400 | 2.16815600  | -0.31375500 |
| H | 2.02968600  | 2.71308000  | 0.27934000  |
| H | 3.23421800  | 0.83551100  | 0.34577400  |
| C | 2.81455600  | -1.74214800 | 0.20969700  |
| H | 2.56162500  | -2.72381200 | -0.19838500 |
| H | 3.85089600  | -1.51358400 | -0.06337500 |
| H | 2.77641000  | -1.80564900 | 1.30448200  |
| H | -0.05377900 | 3.24592000  | -0.28766100 |
| C | -2.86158000 | -0.26906500 | -0.12520400 |
| H | -3.53351500 | 0.52254600  | -0.51811000 |
| O | -3.24110400 | -1.41821100 | -0.07436000 |

2-CH<sub>3</sub>-7-CN-substituted

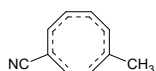

|   |             |             |             |
|---|-------------|-------------|-------------|
| C | -0.60725800 | -0.80403900 | 0.96878300  |
| C | 0.77478700  | -1.03927600 | -0.92464800 |
| C | -1.55603300 | -0.01578800 | 0.36977100  |
| C | -1.35123900 | 1.34339900  | -0.01789700 |
| C | -0.19137900 | 2.07923700  | -0.10279300 |
| C | 1.22222600  | 1.85768000  | 0.03907000  |
| C | 2.09739000  | 0.79434400  | 0.00210700  |
| C | 1.90568200  | -0.58810500 | -0.30418200 |
| H | 0.23095200  | -0.33096400 | 1.46282500  |
| H | -0.83025500 | -1.83313900 | 1.23224100  |
| H | 0.11772200  | -0.34461700 | -1.43381100 |
| H | 0.65896600  | -2.09149600 | -1.17247900 |
| H | -2.25735000 | 1.88351100  | -0.28320100 |
| H | 1.73931800  | 2.80645400  | 0.18167100  |
| H | 3.12348600  | 1.05947100  | 0.25889300  |
| C | 2.96427300  | -1.55008500 | 0.17837200  |
| H | 2.79066100  | -2.55977200 | -0.20169700 |
| H | 3.95827400  | -1.22750200 | -0.15086900 |
| H | 2.98665500  | -1.59447100 | 1.27441300  |
| H | -0.39452800 | 3.13163000  | -0.29828000 |
| C | -2.81526700 | -0.61589100 | -0.00119400 |

N -3.82614200 -1.09542400 -0.30200500

2-CH<sub>3</sub>-7-NO<sub>2</sub>-substituted

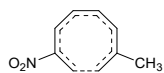

|   |             |             |             |
|---|-------------|-------------|-------------|
| C | -0.29582200 | -0.73848000 | 0.95566200  |
| C | 1.05905000  | -0.97530600 | -0.96938000 |
| C | -1.19184800 | 0.11638300  | 0.39145700  |
| C | -0.96761800 | 1.47206700  | 0.03394900  |
| C | 0.21989700  | 2.15954000  | -0.04392500 |
| C | 1.62487100  | 1.87256300  | 0.08936300  |
| C | 2.45275000  | 0.77587600  | 0.01633700  |
| C | 2.20120100  | -0.59095600 | -0.32873600 |
| H | 0.56092600  | -0.31418400 | 1.46155600  |
| H | -0.56882300 | -1.76576400 | 1.16666900  |
| H | 0.43182400  | -0.23618400 | -1.45361600 |
| H | 0.89201800  | -2.01438500 | -1.24161400 |
| H | -1.86149700 | 2.03943900  | -0.20299600 |
| H | 2.18175600  | 2.79335700  | 0.26252400  |
| H | 3.49008800  | 0.98863700  | 0.27648500  |
| C | 3.21291400  | -1.60948300 | 0.13655600  |
| H | 2.99453000  | -2.60254300 | -0.26344100 |
| H | 4.22180500  | -1.32587100 | -0.18309100 |
| H | 3.22889500  | -1.67558100 | 1.23163100  |
| H | 0.06176400  | 3.22388900  | -0.21318900 |
| N | -2.49901100 | -0.45510700 | -0.00508300 |
| O | -2.62746700 | -1.66732100 | 0.04384100  |
| O | -3.37660600 | 0.31503700  | -0.35546900 |

2- NH<sub>2</sub>-7-NH<sub>2</sub>-substituted

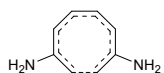

|   |             |             |             |
|---|-------------|-------------|-------------|
| C | 0.76683900  | -1.02477200 | -0.92993200 |
| C | -0.76355500 | -1.03650000 | 0.90935300  |
| C | 1.78931200  | -0.40293100 | -0.27009500 |
| C | 1.75574000  | 0.99167700  | 0.03932500  |
| C | 0.71692000  | 1.89517200  | 0.06720600  |
| C | -0.71351200 | 1.89657300  | -0.08129200 |
| C | -1.75564900 | 0.99796500  | -0.02982900 |
| C | -1.79072800 | -0.39696100 | 0.27473800  |
| H | 0.05406000  | -0.42727600 | -1.48220900 |
| H | 0.81446000  | -2.08676300 | -1.15745800 |
| H | -0.03051700 | -0.46050800 | 1.45843300  |
| H | -0.82071400 | -2.09841800 | 1.13736500  |
| H | 2.72381300  | 1.42011200  | 0.30361000  |
| H | -1.07185400 | 2.91409600  | -0.23676100 |
| H | -2.73224300 | 1.42174100  | -0.26424400 |
| N | -2.95421600 | -1.08063400 | -0.13941400 |
| H | -2.92771200 | -2.07699800 | 0.04194100  |
| H | -3.22404800 | -0.90195000 | -1.10068000 |
| H | 1.07763400  | 2.91257600  | 0.21863300  |
| N | 2.85207000  | -1.15712800 | 0.26816700  |
| H | 3.60538100  | -0.60121000 | 0.65400500  |
| H | 3.21456000  | -1.87240500 | -0.35074000 |

2- NH<sub>2</sub>-7-OH-substituted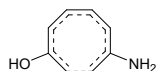

|   |             |             |             |
|---|-------------|-------------|-------------|
| C | -0.75044900 | -1.06534300 | 0.86352100  |
| C | 0.76623100  | -1.02204700 | -0.90810800 |
| C | -1.78516800 | -0.41421900 | 0.24982800  |
| C | -1.78034000 | 0.96637400  | -0.06890400 |
| C | -0.75180000 | 1.88662000  | -0.07629000 |
| C | 0.67110200  | 1.90178700  | 0.09578200  |
| C | 1.72795300  | 1.01356600  | 0.05731000  |
| C | 1.78856800  | -0.37176700 | -0.26448600 |
| H | -0.04094500 | -0.48396300 | 1.43608800  |
| H | -0.81659400 | -2.12640700 | 1.09483100  |
| H | 0.04956500  | -0.44461000 | -1.47740000 |
| H | 0.85456500  | -2.07618800 | -1.16212700 |
| H | -2.75667100 | 1.35129400  | -0.35690500 |
| H | 1.01775600  | 2.92193100  | 0.26040400  |
| H | 2.69295700  | 1.44790800  | 0.31836600  |
| N | 2.95489000  | -1.04783200 | 0.14552500  |
| H | 2.94918400  | -2.04124100 | -0.05095000 |
| H | 3.23432100  | -0.87082200 | 1.10391000  |
| H | -1.12372800 | 2.89920700  | -0.23055300 |
| O | -2.88811200 | -1.08324200 | -0.23082000 |
| H | -2.95633600 | -1.94618500 | 0.20030100  |

2- NH<sub>2</sub>-7-F-substituted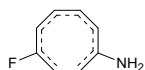

|   |             |             |             |
|---|-------------|-------------|-------------|
| C | 0.73605100  | -1.13196800 | -0.85192700 |
| C | -0.79126800 | -0.99526200 | 0.96371400  |
| C | 1.74753600  | -0.44277100 | -0.26476800 |
| C | 1.79267100  | 0.92727400  | 0.07474800  |
| C | 0.79062100  | 1.87408200  | 0.09098500  |
| C | -0.63001100 | 1.91076400  | -0.09883300 |
| C | -1.69227400 | 1.03230200  | -0.07900300 |
| C | -1.77768400 | -0.35122100 | 0.26600600  |
| H | -0.01490900 | -0.59344000 | -1.41180300 |
| H | 0.84526500  | -2.19541000 | -1.03796600 |
| H | -0.06732500 | -0.41145600 | 1.51568200  |
| H | -0.88953500 | -2.04581000 | 1.22467400  |
| H | 2.78250000  | 1.27785600  | 0.35937200  |
| H | -0.96111000 | 2.93406300  | -0.27556100 |
| H | -2.64009400 | 1.47930700  | -0.38204000 |
| N | -2.84986900 | -1.07936400 | -0.27762100 |
| H | -3.22710800 | -1.79886800 | 0.32690400  |
| H | -3.58755200 | -0.51579300 | -0.68125800 |
| H | 1.18238800  | 2.87678400  | 0.25746500  |
| F | 2.83030100  | -1.15454200 | 0.16026000  |

2- NH<sub>2</sub>-7-CHO-substituted

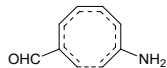

|   |             |             |             |
|---|-------------|-------------|-------------|
| C | -0.73320400 | -0.69713200 | 0.94453600  |
| C | 0.81516600  | -1.03702600 | -1.06069400 |
| C | -1.51637500 | 0.21047700  | 0.30394200  |
| C | -1.12506900 | 1.54538500  | -0.06111300 |
| C | 0.09631300  | 2.15479000  | -0.12009200 |
| C | 1.47620400  | 1.77390000  | 0.11263800  |
| C | 2.22237100  | 0.63256700  | 0.08160600  |
| C | 1.88743600  | -0.72669500 | -0.28886600 |
| H | 0.18786000  | -0.41328100 | 1.43625100  |
| H | -1.12444300 | -1.69335200 | 1.13575800  |
| H | 0.25785100  | -0.24902600 | -1.54828900 |
| H | 0.58791800  | -2.06415900 | -1.33198200 |
| H | -1.95764400 | 2.18830000  | -0.35089000 |
| H | 2.08141500  | 2.65453500  | 0.32886000  |
| H | 3.26088600  | 0.76668800  | 0.38695300  |
| N | 2.67974000  | -1.72183900 | 0.29638400  |
| H | 2.76143400  | -2.57887800 | -0.23621800 |
| H | 3.57616600  | -1.41244100 | 0.64965300  |
| H | 0.02687800  | 3.21748400  | -0.35073400 |
| C | -2.87256000 | -0.21773300 | -0.12753900 |
| H | -3.50840600 | 0.58652400  | -0.55457400 |
| O | -3.30122300 | -1.34759000 | -0.04324700 |

2-NH<sub>2</sub>-7-CN-substituted

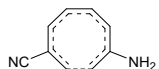

|   |             |             |             |
|---|-------------|-------------|-------------|
| C | -0.63738700 | -0.80292600 | 0.99936800  |
| C | 0.82240000  | -1.08259400 | -0.98110600 |
| C | -1.55373200 | -0.00424400 | 0.38276400  |
| C | -1.31706300 | 1.35469200  | -0.02308400 |
| C | -0.15127800 | 2.06442200  | -0.12596200 |
| C | 1.26538700  | 1.82035200  | 0.03982500  |
| C | 2.12384800  | 0.75663900  | 0.00707700  |
| C | 1.91043000  | -0.63836100 | -0.29389300 |
| H | 0.24027500  | -0.36762700 | 1.45858900  |
| H | -0.87443500 | -1.83142100 | 1.25247500  |
| H | 0.18736600  | -0.37461100 | -1.49641100 |
| H | 0.68965100  | -2.13720500 | -1.20670500 |
| H | -2.21456800 | 1.90870200  | -0.28978700 |
| H | 1.79252600  | 2.76230000  | 0.19086700  |
| H | 3.15627300  | 1.00715700  | 0.25295800  |
| N | 2.82445800  | -1.53346700 | 0.27053000  |
| H | 2.98568100  | -2.38358600 | -0.25460400 |
| H | 3.68763300  | -1.12652800 | 0.60657800  |
| H | -0.33051600 | 3.11411200  | -0.35530200 |
| C | -2.82434200 | -0.57542300 | 0.00569200  |
| N | -3.84581000 | -1.02748200 | -0.30235200 |

2-NH<sub>2</sub>-7-NO<sub>2</sub>-substituted



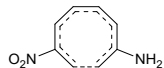

|   |             |             |             |
|---|-------------|-------------|-------------|
| C | -0.32964600 | -0.75289300 | 0.97963200  |
| C | 1.11426200  | -1.00772700 | -1.05183400 |
| C | -1.18946100 | 0.11703800  | 0.40298300  |
| C | -0.92981500 | 1.47645600  | 0.04041600  |
| C | 0.26282500  | 2.13760700  | -0.04311400 |
| C | 1.66947800  | 1.82483600  | 0.11997300  |
| C | 2.47954700  | 0.72928800  | 0.03725400  |
| C | 2.20755900  | -0.64359300 | -0.33057500 |
| H | 0.56917900  | -0.37428800 | 1.44710200  |
| H | -0.61972700 | -1.77904600 | 1.17221200  |
| H | 0.50850900  | -0.24683700 | -1.52564200 |
| H | 0.93307300  | -2.04352300 | -1.32508900 |
| H | -1.81236600 | 2.06135800  | -0.19575100 |
| H | 2.23461300  | 2.73455000  | 0.32237900  |
| H | 3.52133100  | 0.92227500  | 0.29536300  |
| N | 3.07741000  | -1.59629400 | 0.20475800  |
| H | 3.19051700  | -2.44278900 | -0.33839900 |
| H | 3.96055700  | -1.24388100 | 0.55025400  |
| H | 0.13052800  | 3.20128700  | -0.23600800 |
| N | -2.50892200 | -0.41795800 | -0.00182100 |
| O | -3.32851100 | 0.36626000  | -0.45121400 |
| O | -2.70950400 | -1.61318700 | 0.13679200  |

2-OH-7-OH-substituted

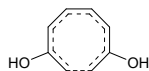

|   |             |             |             |
|---|-------------|-------------|-------------|
| C | 0.75817600  | -1.05271800 | -0.87300800 |
| C | -0.75816500 | -1.05260100 | 0.87315100  |
| C | 1.77956000  | -0.39000200 | -0.24459900 |
| C | 1.74821900  | 0.98249700  | 0.09945500  |
| C | 0.70762300  | 1.89219000  | 0.10310400  |
| C | -0.70781000 | 1.89215100  | -0.10311600 |
| C | -1.74833500 | 0.98237700  | -0.09952200 |
| C | -1.77961800 | -0.39011000 | 0.24460200  |
| H | 0.04484900  | -0.47955500 | -1.44921700 |
| H | 0.85096900  | -2.10790300 | -1.12188900 |
| H | -0.04483500 | -0.47925800 | 1.44917200  |
| H | -0.85082300 | -2.10774000 | 1.12227300  |
| H | 2.71401200  | 1.37509400  | 0.41136500  |
| H | -1.06621700 | 2.90658800  | -0.27615200 |
| H | -2.71413100 | 1.37489700  | -0.41152800 |
| O | -2.88977100 | -1.04861800 | -0.23235300 |
| H | -2.98319700 | -1.89758700 | 0.22129000  |
| H | 1.06598100  | 2.90664500  | 0.27611700  |
| O | 2.88993500  | -1.04849700 | 0.23237700  |
| H | 2.98417500  | -1.89696500 | -0.22203300 |

2-OH-7-F-substituted

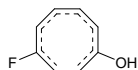

|   |             |             |             |
|---|-------------|-------------|-------------|
| C | 0.74014300  | -1.11189900 | -0.86060800 |
| C | -0.77568800 | -1.04284300 | 0.89433600  |
| C | 1.74540900  | -0.41815000 | -0.25621000 |
| C | 1.76750000  | 0.94162200  | 0.10513200  |
| C | 0.75228200  | 1.88086900  | 0.10729700  |
| C | -0.66017400 | 1.90358000  | -0.10593200 |
| C | -1.71267000 | 1.00788300  | -0.10782400 |
| C | -1.77202800 | -0.36275000 | 0.24448500  |
| H | 0.01101400  | -0.56636800 | -1.44273200 |
| H | 0.87506300  | -2.16737900 | -1.07427100 |
| H | -0.05309400 | -0.47885500 | 1.46770900  |
| H | -0.89485300 | -2.09247500 | 1.15375200  |
| H | 2.74587000  | 1.29943900  | 0.41850900  |
| H | -1.00281400 | 2.92270100  | -0.28295200 |
| H | -2.66964300 | 1.41273000  | -0.43077300 |
| O | -2.88770400 | -0.99886900 | -0.24218500 |
| H | -2.99662300 | -1.85290400 | 0.19894600  |
| H | 1.13296200  | 2.88628500  | 0.28286800  |
| F | 2.82723300  | -1.12912200 | 0.16915200  |

#### 2-OH-7-CHO-substituted

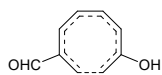

|   |             |             |             |
|---|-------------|-------------|-------------|
| C | 0.72593800  | -0.67192700 | -0.95204500 |
| C | -0.76059000 | -1.09140100 | 0.95641500  |
| C | 1.50753700  | 0.23695400  | -0.29935900 |
| C | 1.09846800  | 1.55357100  | 0.08606100  |
| C | -0.13593600 | 2.14859400  | 0.13738300  |
| C | -1.50364100 | 1.75384300  | -0.10608300 |
| C | -2.23594300 | 0.59774000  | -0.09907400 |
| C | -1.87444500 | -0.74240900 | 0.26137700  |
| H | -0.17109400 | -0.36810500 | -1.47545000 |
| H | 1.13243000  | -1.65695200 | -1.16829600 |
| H | -0.19849800 | -0.32365900 | 1.46911600  |
| H | -0.54807300 | -2.12625900 | 1.21253800  |
| H | 1.91802000  | 2.20190100  | 0.39987900  |
| H | -2.12289900 | 2.62781200  | -0.30802900 |
| H | -3.27326800 | 0.69070600  | -0.41353500 |
| O | -2.74926900 | -1.66594300 | -0.24210800 |
| H | -2.55834000 | -2.53818100 | 0.13188200  |
| H | -0.07965300 | 3.21050700  | 0.37466900  |
| C | 2.86212400  | -0.18994800 | 0.13448200  |
| H | 3.49890400  | 0.61474400  | 0.55844400  |
| O | 3.28694500  | -1.32188300 | 0.05508800  |

#### 2-OH-7-CN-substituted

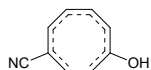

|   |             |             |             |
|---|-------------|-------------|-------------|
| C | -0.63429000 | -0.78296400 | 0.99964300  |
| C | 0.78728200  | -1.13169400 | -0.88349800 |
| C | -1.54864000 | 0.01991300  | 0.37125800  |
| C | -1.29128600 | 1.36155100  | -0.05378100 |
| C | -0.11186500 | 2.06125300  | -0.14158700 |

|   |             |             |             |
|---|-------------|-------------|-------------|
| C | 1.29348200  | 1.80440300  | 0.04215000  |
| C | 2.14193500  | 0.72606300  | 0.03306100  |
| C | 1.90443400  | -0.65001000 | -0.26790600 |
| H | 0.22062300  | -0.33275000 | 1.48687600  |
| H | -0.89396700 | -1.79771600 | 1.28441700  |
| H | 0.14896700  | -0.44752800 | -1.42538300 |
| H | 0.67542700  | -2.19139600 | -1.10030900 |
| H | -2.17644400 | 1.92150600  | -0.34783500 |
| H | 1.83251300  | 2.74033200  | 0.18686300  |
| H | 3.17618400  | 0.93599200  | 0.29689900  |
| O | 2.88692500  | -1.46923000 | 0.21512700  |
| H | 2.78953700  | -2.35828200 | -0.15524600 |
| H | -0.27949500 | 3.11184600  | -0.37526600 |
| C | -2.82171900 | -0.54664100 | -0.00247100 |
| N | -3.84353500 | -0.99991600 | -0.30760700 |

### 2-OH-7-NO<sub>2</sub>-substituted

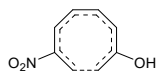

|   |             |             |             |
|---|-------------|-------------|-------------|
| C | -0.32156300 | -0.73404200 | 0.98390600  |
| C | 1.07447200  | -1.06448100 | -0.94421700 |
| C | -1.18404000 | 0.13550400  | 0.39533500  |
| C | -0.91060600 | 1.47749500  | 0.00770300  |
| C | 0.29279500  | 2.13160100  | -0.06666200 |
| C | 1.68883900  | 1.81125600  | 0.11245900  |
| C | 2.49267000  | 0.70323100  | 0.05724400  |
| C | 2.20154400  | -0.65268600 | -0.30092600 |
| H | 0.55197200  | -0.33534300 | 1.48220400  |
| H | -0.62867700 | -1.74839700 | 1.20999000  |
| H | 0.46125900  | -0.33001400 | -1.44820100 |
| H | 0.91575300  | -2.10876300 | -1.20163600 |
| H | -1.78439500 | 2.06414000  | -0.25598900 |
| H | 2.26278200  | 2.71803700  | 0.30171100  |
| H | 3.53423900  | 0.86014900  | 0.32906000  |
| O | 3.14961700  | -1.52483200 | 0.15317100  |
| H | 3.00606200  | -2.40135400 | -0.23233800 |
| H | 0.16820300  | 3.19439000  | -0.26895800 |
| N | -2.50207000 | -0.40153900 | -0.00639300 |
| O | -2.68737700 | -1.60227600 | 0.10796200  |
| O | -3.33441000 | 0.38344000  | -0.42865200 |

### 2-F-7-F-substituted

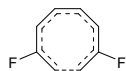

|   |             |             |             |
|---|-------------|-------------|-------------|
| C | 0.75984900  | -1.10471000 | -0.87980300 |
| C | -0.75983300 | -1.10469300 | 0.87980900  |
| C | 1.73842100  | -0.39078500 | -0.25474300 |
| C | 1.73184600  | 0.96745900  | 0.11483900  |
| C | 0.70443700  | 1.89384800  | 0.11048600  |
| C | -0.70445900 | 1.89384400  | -0.11049600 |
| C | -1.73186300 | 0.96745100  | -0.11484900 |
| C | -1.73841700 | -0.39079200 | 0.25474000  |
| H | 0.02232800  | -0.57163100 | -1.46244300 |
| H | 0.92365600  | -2.15435800 | -1.10094700 |

|   |             |             |             |
|---|-------------|-------------|-------------|
| H | -0.02231800 | -0.57158800 | 1.46243300  |
| H | -0.92362300 | -2.15433800 | 1.10097700  |
| H | 2.70150600  | 1.33753200  | 0.44052100  |
| H | -1.06998900 | 2.90419300  | -0.28954900 |
| H | -2.70152600 | 1.33751000  | -0.44053600 |
| H | 1.06995100  | 2.90418900  | 0.28958700  |
| F | -2.82906600 | -1.07897100 | -0.17898800 |
| F | 2.82907900  | -1.07894500 | 0.17899400  |

#### 2-F-7-CHO-substituted

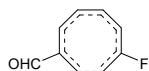

|   |             |             |             |
|---|-------------|-------------|-------------|
| C | -0.73051300 | -0.66714500 | 0.96120800  |
| C | 0.72150300  | -1.15353500 | -0.92148800 |
| C | -1.49155200 | 0.25403900  | 0.29695100  |
| C | -1.06273900 | 1.55936000  | -0.09236600 |
| C | 0.18055100  | 2.14363900  | -0.13676700 |
| C | 1.53816900  | 1.73167100  | 0.10081700  |
| C | 2.24350400  | 0.55426200  | 0.09856400  |
| C | 1.83837400  | -0.75831500 | -0.26741900 |
| H | 0.16275900  | -0.37132000 | 1.49512300  |
| H | -1.15798400 | -1.64134000 | 1.18540400  |
| H | 0.13860800  | -0.41594100 | -1.45380600 |
| H | 0.55541500  | -2.20405700 | -1.13399000 |
| H | -1.87190000 | 2.21662100  | -0.41435700 |
| H | 2.17787300  | 2.59298700  | 0.29138500  |
| H | 3.28395000  | 0.61707200  | 0.40903000  |
| H | 0.13458200  | 3.20739300  | -0.36721400 |
| F | 2.67843900  | -1.72458900 | 0.18262700  |
| C | -2.85425400 | -0.15185400 | -0.14061900 |
| H | -3.47715200 | 0.66217100  | -0.56668900 |
| O | -3.29379400 | -1.27687700 | -0.06022600 |

#### 2-F-7-CN-substituted

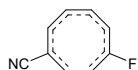

|   |             |             |             |
|---|-------------|-------------|-------------|
| C | -0.63888300 | -0.78396600 | 1.00952300  |
| C | 0.75997400  | -1.18925600 | -0.85534500 |
| C | -1.53491100 | 0.03353100  | 0.36932000  |
| C | -1.25892800 | 1.36753500  | -0.05867900 |
| C | -0.07134700 | 2.05983400  | -0.13940200 |
| C | 1.32641100  | 1.78807900  | 0.03940200  |
| C | 2.15234700  | 0.68780800  | 0.03448100  |
| C | 1.87022000  | -0.66523300 | -0.27560600 |
| H | 0.21582400  | -0.34261300 | 1.50481400  |
| H | -0.92055700 | -1.79038300 | 1.30231600  |
| H | 0.10260400  | -0.53507500 | -1.41043600 |
| H | 0.69821100  | -2.25738900 | -1.03526800 |
| H | -2.13632400 | 1.93555500  | -0.36026300 |
| H | 1.88370200  | 2.71404700  | 0.17642800  |
| H | 3.19202400  | 0.86862600  | 0.29746700  |
| H | -0.23086400 | 3.11309400  | -0.36617200 |
| C | -2.81676900 | -0.51278600 | -0.00766500 |
| N | -3.84499200 | -0.94809900 | -0.31611200 |

F 2.82018300 -1.53138300 0.15641400

2-F-7-NO<sub>2</sub>-substituted

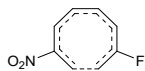

|   |             |             |             |
|---|-------------|-------------|-------------|
| C | -0.32455900 | -0.74257300 | 0.98960500  |
| C | 1.04720400  | -1.12944500 | -0.90937400 |
| C | -1.16988500 | 0.14150800  | 0.39209400  |
| C | -0.88236900 | 1.47574700  | 0.00273800  |
| C | 0.32704200  | 2.12678500  | -0.06531200 |
| C | 1.71539000  | 1.79629500  | 0.10389000  |
| C | 2.49933400  | 0.66864800  | 0.05350800  |
| C | 2.16944100  | -0.66399700 | -0.30631500 |
| H | 0.54527900  | -0.35285000 | 1.50091100  |
| H | -0.65306700 | -1.74880000 | 1.22220500  |
| H | 0.41042800  | -0.43198400 | -1.43529500 |
| H | 0.94457200  | -2.18807300 | -1.12309100 |
| H | -1.75070100 | 2.06796200  | -0.26689000 |
| H | 2.30581000  | 2.69480500  | 0.27971500  |
| H | 3.54520000  | 0.80087600  | 0.32086500  |
| H | 0.20624600  | 3.19159300  | -0.25836500 |
| F | 3.08703500  | -1.57503300 | 0.09876200  |
| N | -2.49886100 | -0.37792800 | -0.01049200 |
| O | -3.32515100 | 0.42142100  | -0.41509500 |
| O | -2.69168000 | -1.57773800 | 0.08753600  |

2-CHO-7-CHO-substituted

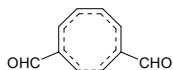

|   |             |             |             |
|---|-------------|-------------|-------------|
| C | 0.76616400  | -0.66749300 | -0.98792800 |
| C | -0.76613200 | -0.66732800 | 0.98830500  |
| C | 1.74322500  | -0.01426700 | -0.30139300 |
| C | 1.72415900  | 1.36781500  | 0.08324200  |
| C | 0.71114400  | 2.28872800  | 0.12267600  |
| C | -0.71139200 | 2.28864100  | -0.12298200 |
| C | -1.72433000 | 1.36765400  | -0.08325100 |
| C | -1.74323600 | -0.01437200 | 0.30158800  |
| H | -0.02814900 | -0.12536400 | -1.48352700 |
| H | 0.88713800  | -1.72398000 | -1.21357100 |
| H | 0.02807000  | -0.12496000 | 1.48382600  |
| H | -0.88694800 | -1.72378600 | 1.21416300  |
| H | 2.69344600  | 1.75503900  | 0.39968900  |
| H | -1.06567000 | 3.29387100  | -0.35034000 |
| H | -2.69367000 | 1.75471900  | -0.39974600 |
| H | 1.06531000  | 3.29405400  | 0.34978900  |
| C | -2.93212300 | -0.80197800 | -0.14070600 |
| H | -3.76069800 | -0.20592200 | -0.57626100 |
| O | -3.02605600 | -2.00396400 | -0.05186700 |
| C | 2.93216000  | -0.80180300 | 0.14090300  |
| H | 3.76045800  | -0.20580300 | 0.57705000  |
| O | 3.02641700  | -2.00371800 | 0.05139200  |

2-CHO-7-CN-substituted

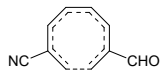

|   |             |             |             |
|---|-------------|-------------|-------------|
| C | 0.68692200  | -0.74804000 | -1.03429000 |
| C | -0.74879600 | -0.73351100 | 0.93760000  |
| C | 1.74438900  | -0.18602500 | -0.37996200 |
| C | 1.83079700  | 1.18579700  | 0.03536500  |
| C | 0.86452700  | 2.15548400  | 0.11550400  |
| C | -0.56314800 | 2.24636700  | -0.06247100 |
| C | -1.63284000 | 1.38864300  | -0.00922300 |
| C | -1.72148700 | 0.00007400  | 0.32360400  |
| H | -0.05590400 | -0.10846900 | -1.49229800 |
| H | 0.69440600  | -1.79671900 | -1.31345900 |
| H | 0.07705300  | -0.24986400 | 1.44259600  |
| H | -0.92143300 | -1.78891600 | 1.13280100  |
| H | 2.82970000  | 1.50694300  | 0.32161600  |
| H | -0.86338100 | 3.27861300  | -0.23962500 |
| H | -2.58679600 | 1.84799500  | -0.27116300 |
| H | 1.28744700  | 3.13558500  | 0.33417700  |
| C | 2.84775300  | -1.03724800 | 0.00423500  |
| N | 3.73707700  | -1.70857600 | 0.31897200  |
| C | -2.96626500 | -0.70343200 | -0.10309800 |
| H | -3.78491200 | -0.04538900 | -0.46061000 |
| O | -3.11085400 | -1.90355200 | -0.08130300 |

2-CHO-7-NO<sub>2</sub>-substituted

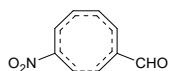

|   |             |             |             |
|---|-------------|-------------|-------------|
| C | 0.40980100  | -0.62999600 | -1.01381700 |
| C | -1.01291000 | -0.66857200 | 0.96487200  |
| C | 1.40797200  | 0.04678500  | -0.39552500 |
| C | 1.43016000  | 1.41885600  | -0.01223400 |
| C | 0.39701800  | 2.31758600  | 0.05689800  |
| C | -1.03416000 | 2.29883900  | -0.11354600 |
| C | -2.03881900 | 1.36780300  | -0.03368300 |
| C | -2.02946200 | -0.01590000 | 0.33217700  |
| H | -0.37763600 | -0.06412200 | -1.49240500 |
| H | 0.50755300  | -1.68596000 | -1.23776500 |
| H | -0.22234400 | -0.12006700 | 1.46070800  |
| H | -1.11255300 | -1.72977300 | 1.17930800  |
| H | 2.41119400  | 1.80176000  | 0.24830600  |
| H | -1.41028300 | 3.30160100  | -0.31363800 |
| H | -3.02381700 | 1.75136700  | -0.30235000 |
| H | 0.74903600  | 3.33049900  | 0.24852000  |
| C | -3.22402900 | -0.81319000 | -0.07855600 |
| H | -4.08506300 | -0.22147900 | -0.45166200 |
| O | -3.28517700 | -2.01904300 | -0.02755700 |
| N | 2.59854700  | -0.75187600 | 0.00923000  |
| O | 2.52301400  | -1.96368000 | -0.07959400 |
| O | 3.57974500  | -0.14652300 | 0.40175800  |

2-CN-7-CN-substituted

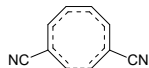

|   |             |             |             |
|---|-------------|-------------|-------------|
| C | 0.68375300  | -0.81963200 | -0.97646100 |
| C | -0.68376600 | -0.81963700 | 0.97648000  |
| C | 1.73354500  | -0.17306100 | -0.38304100 |
| C | 1.74340500  | 1.20957200  | -0.01215500 |
| C | 0.71630500  | 2.11867200  | 0.06834900  |
| C | -0.71628500 | 2.11866700  | -0.06835000 |
| C | -1.74339000 | 1.20957000  | 0.01215500  |
| C | -1.73354600 | -0.17306000 | 0.38304800  |
| H | -0.09527000 | -0.23991700 | -1.45418900 |
| H | 0.75170100  | -1.87325800 | -1.22829700 |
| H | 0.09525700  | -0.23992900 | 1.45421600  |
| H | -0.75172100 | -1.87326400 | 1.22831200  |
| H | 2.72558300  | 1.60388900  | 0.23841300  |
| H | -1.08249800 | 3.12900000  | -0.24647700 |
| H | -2.72556100 | 1.60388900  | -0.23843600 |
| H | 1.08250800  | 3.12899900  | 0.24648700  |
| C | 2.89535400  | -0.94714000 | -0.01073200 |
| N | 3.82637600  | -1.56432000 | 0.29411700  |
| C | -2.89536100 | -0.94713200 | 0.01072400  |
| N | -3.82638900 | -1.56429800 | -0.29413500 |

#### 2-CN-7-NO<sub>2</sub>-substituted

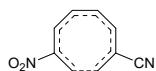

|   |             |             |             |
|---|-------------|-------------|-------------|
| C | -0.39162600 | -0.71238000 | 0.95852000  |
| C | 0.96239500  | -0.74969900 | -1.00138200 |
| C | -1.38291600 | 0.02784700  | 0.39673600  |
| C | -1.34898200 | 1.40553200  | 0.05105200  |
| C | -0.27281900 | 2.25559400  | -0.02554600 |
| C | 1.15814000  | 2.16816700  | 0.10334600  |
| C | 2.12987100  | 1.20242600  | 0.00232000  |
| C | 2.04210500  | -0.17193900 | -0.39235300 |
| H | 0.41838500  | -0.19468900 | 1.45433000  |
| H | -0.53684500 | -1.76760500 | 1.15984000  |
| H | 0.21823800  | -0.11747200 | -1.46870400 |
| H | 0.96877800  | -1.80175800 | -1.26827700 |
| H | -2.31611100 | 1.84274100  | -0.17479900 |
| H | 1.58394100  | 3.15176100  | 0.29781400  |
| H | 3.13363200  | 1.53477800  | 0.25688900  |
| H | -0.58057500 | 3.28818400  | -0.18400700 |
| C | 3.16029800  | -1.01240200 | -0.02916500 |
| N | 4.06014600  | -1.67667600 | 0.26977200  |
| N | -2.61586200 | -0.70481700 | 0.00160700  |
| O | -3.59665300 | -0.04618600 | -0.29199100 |
| O | -2.57062500 | -1.92185900 | -0.00224700 |

#### 2-NO<sub>2</sub>-7-NO<sub>2</sub>-substituted

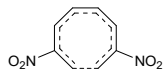

|   |             |             |             |
|---|-------------|-------------|-------------|
| C | 0.67610200  | -0.63198200 | -0.98092800 |
| C | -0.67606100 | -0.63195100 | 0.98110800  |
| C | 1.69971700  | 0.04603500  | -0.40110900 |
| C | 1.74186000  | 1.41840400  | -0.03281500 |
| C | 0.71690900  | 2.32765700  | 0.06166600  |
| C | -0.71712300 | 2.32754900  | -0.06226000 |
| C | -1.74196700 | 1.41821500  | 0.03256000  |
| C | -1.69968500 | 0.04593600  | 0.40117700  |
| H | -0.10379700 | -0.06439600 | -1.47102500 |
| H | 0.76103400  | -1.69178700 | -1.19314300 |
| H | 0.10375500  | -0.06427600 | 1.47124100  |
| H | -0.76092700 | -1.69176100 | 1.19333300  |
| H | 2.73254800  | 1.79581600  | 0.19865400  |
| H | -1.08592300 | 3.33703400  | -0.23813100 |
| H | -2.73273400 | 1.79545100  | -0.19890300 |
| H | 1.08559400  | 3.33723700  | 0.23722600  |
| N | -2.89138500 | -0.75877300 | 0.01310300  |
| O | -2.77320000 | -1.97040000 | 0.00754700  |
| O | -3.91058200 | -0.15787500 | -0.27233000 |
| N | 2.89144800  | -0.75863800 | -0.01293500 |
| O | 2.77369800  | -1.97031300 | -0.00863500 |
| O | 3.91027100  | -0.15773900 | 0.27381500  |

### 5.3.14 3,4-substituted

#### 3-CH<sub>3</sub>-4-CH<sub>3</sub>-substituted

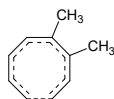

|   |             |             |             |
|---|-------------|-------------|-------------|
| C | -2.10132900 | -0.69862700 | 0.93918200  |
| C | -1.02231000 | -1.56488200 | -0.92217500 |
| C | -2.51544400 | 0.45177400  | 0.31818400  |
| C | -1.65465500 | 1.46734200  | -0.15392700 |
| C | -0.27493600 | 1.54729100  | -0.28754900 |
| C | 0.90343900  | 0.74717700  | -0.09016100 |
| C | 1.12092800  | -0.63523600 | -0.02742300 |
| C | 0.21300100  | -1.68256800 | -0.34234800 |
| H | -1.13693800 | -0.73202000 | 1.42737400  |
| H | -2.82641000 | -1.44564300 | 1.25178100  |
| H | -1.29258800 | -0.66822400 | -1.46367700 |
| H | -1.60069000 | -2.45795000 | -1.14112600 |
| H | -3.57208100 | 0.56500900  | 0.07998900  |
| H | -2.16636200 | 2.36722700  | -0.49237200 |
| H | 0.00729900  | 2.55605200  | -0.58643700 |
| H | 0.51449400  | -2.67857200 | -0.01947900 |
| C | 2.50601800  | -1.11496400 | 0.37462200  |
| H | 2.87087900  | -0.62596400 | 1.28365000  |
| H | 2.50370400  | -2.19322300 | 0.55126600  |
| H | 3.24405600  | -0.91941400 | -0.41328900 |
| C | 2.15748800  | 1.60544500  | 0.05810200  |
| H | 1.95257600  | 2.65327500  | -0.16876200 |
| H | 2.53761500  | 1.57024600  | 1.08676200  |
| H | 2.97124200  | 1.27268400  | -0.59473100 |

#### 3-CH<sub>3</sub>-4-NH<sub>2</sub>-substituted



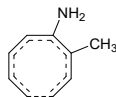

|   |             |             |             |
|---|-------------|-------------|-------------|
| C | 2.01515400  | 0.77231700  | 0.93399400  |
| C | 0.95148500  | 1.60413000  | -0.90749300 |
| C | 2.51116900  | -0.36647200 | 0.34688800  |
| C | 1.70227900  | -1.41208600 | -0.14793400 |
| C | 0.33373100  | -1.53545900 | -0.32008500 |
| C | -0.87389500 | -0.78248400 | -0.08978000 |
| C | -1.16432600 | 0.58965700  | -0.02627000 |
| C | -0.30548900 | 1.66570000  | -0.35843400 |
| H | 1.04294500  | 0.74550500  | 1.40894900  |
| H | 2.69002100  | 1.55805500  | 1.26354600  |
| H | 1.26368100  | 0.72794300  | -1.46033600 |
| H | 1.48844600  | 2.52520500  | -1.11421500 |
| H | 3.57636700  | -0.43105900 | 0.13299000  |
| H | 2.25204500  | -2.28534300 | -0.49633200 |
| H | 0.06594700  | -2.53150100 | -0.67434200 |
| H | -0.65570900 | 2.64788800  | -0.04100200 |
| C | -2.57013700 | 0.98968500  | 0.38411500  |
| H | -2.88007500 | 0.51647400  | 1.32453800  |
| H | -2.63360800 | 2.07103900  | 0.52548800  |
| H | -3.31257000 | 0.73009600  | -0.38341900 |
| N | -1.97497500 | -1.66317000 | -0.01375500 |
| H | -1.80486400 | -2.52138900 | 0.49385700  |
| H | -2.86761600 | -1.26064400 | 0.22656200  |

### 3-CH<sub>3</sub>-4-OH-substituted

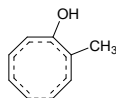

|   |             |             |             |
|---|-------------|-------------|-------------|
| C | 2.00559700  | 0.77749000  | 0.94892400  |
| C | 0.89449600  | 1.65297700  | -0.89069900 |
| C | 2.51182300  | -0.33027300 | 0.31812100  |
| C | 1.71962000  | -1.38865400 | -0.18006300 |
| C | 0.34999500  | -1.53434300 | -0.31829400 |
| C | -0.84691800 | -0.77961500 | -0.08205400 |
| C | -1.18914900 | 0.57058000  | -0.02823900 |
| C | -0.35566600 | 1.67726900  | -0.32988400 |
| H | 1.03168500  | 0.72940900  | 1.41841000  |
| H | 2.66898300  | 1.56722700  | 1.29086800  |
| H | 1.22760100  | 0.79061400  | -1.45302600 |
| H | 1.41829300  | 2.58602900  | -1.07645700 |
| H | 3.57522400  | -0.36892100 | 0.08975000  |
| H | 2.27987900  | -2.24762700 | -0.54576400 |
| H | 0.08778800  | -2.53564800 | -0.66738400 |
| H | -0.73400500 | 2.64212100  | 0.00692800  |
| C | -2.61980900 | 0.88254600  | 0.36058800  |
| H | -2.90525900 | 0.37674400  | 1.28764300  |
| H | -2.75452400 | 1.96007100  | 0.48544200  |
| H | -3.31857400 | 0.53952000  | -0.41042700 |
| O | -1.96363200 | -1.59030100 | 0.06051300  |
| H | -1.68796700 | -2.48497900 | 0.29950600  |

3-CH<sub>3</sub>-4-F-substituted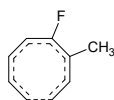

|   |             |             |             |
|---|-------------|-------------|-------------|
| C | 2.02431700  | 0.80341000  | 0.92162300  |
| C | 0.82887100  | 1.67604900  | -0.88439700 |
| C | 2.52601300  | -0.28846300 | 0.26456900  |
| C | 1.74365600  | -1.38388700 | -0.17065800 |
| C | 0.37475400  | -1.55600400 | -0.25613000 |
| C | -0.80497900 | -0.77928900 | -0.07239200 |
| C | -1.20972100 | 0.54355800  | -0.01527200 |
| C | -0.40319600 | 1.67959500  | -0.28918900 |
| H | 1.07004600  | 0.73496600  | 1.42775200  |
| H | 2.67997200  | 1.61254000  | 1.23076900  |
| H | 1.15452800  | 0.82120800  | -1.46332300 |
| H | 1.34648900  | 2.61308500  | -1.06646500 |
| H | 3.57949700  | -0.30142200 | -0.00927600 |
| H | 2.30935600  | -2.25129200 | -0.50558100 |
| H | 0.08439200  | -2.57512000 | -0.50633100 |
| H | -0.79218100 | 2.62923100  | 0.07625800  |
| C | -2.65894800 | 0.79163100  | 0.35043600  |
| H | -2.94996300 | 0.24789900  | 1.25336200  |
| H | -2.83008400 | 1.85910500  | 0.50975900  |
| H | -3.32547300 | 0.45923500  | -0.45259200 |
| F | -1.87235400 | -1.64100200 | 0.04601400  |

3-CH<sub>3</sub>-4-CHO-substituted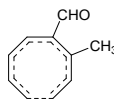

|   |             |             |             |
|---|-------------|-------------|-------------|
| C | 2.48075500  | 0.09980400  | 0.89822400  |
| C | 1.67220300  | 1.21554700  | -0.98761400 |
| C | 2.43854100  | -1.13009000 | 0.29921600  |
| C | 1.25654800  | -1.81210100 | -0.08304800 |
| C | -0.06071700 | -1.40748100 | -0.19706100 |
| C | -0.87186600 | -0.22950600 | -0.04781200 |
| C | -0.61725300 | 1.15190600  | -0.01122100 |
| C | 0.59664300  | 1.79535700  | -0.36801700 |
| H | 1.61258500  | 0.48171200  | 1.41729900  |
| H | 3.43372600  | 0.56139000  | 1.14293400  |
| H | 1.56844800  | 0.26482900  | -1.49378400 |
| H | 2.53245900  | 1.82118400  | -1.25733900 |
| H | 3.37897100  | -1.60429700 | 0.02099000  |
| H | 1.41133600  | -2.85240800 | -0.36447300 |
| H | -0.70965500 | -2.25139300 | -0.42409000 |
| H | 0.69532200  | 2.83682600  | -0.06632400 |
| C | -1.70774700 | 2.12308000  | 0.43326100  |
| H | -2.25091600 | 1.78076700  | 1.31724100  |
| H | -1.25550400 | 3.08652000  | 0.68038300  |
| H | -2.43879800 | 2.31446300  | -0.36044900 |
| C | -2.32833900 | -0.60358500 | 0.00600200  |
| H | -3.04647700 | 0.22909000  | 0.06327900  |
| O | -2.76051200 | -1.73578300 | -0.04090600 |

3-CH<sub>3</sub>-4-CN-substituted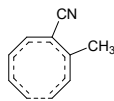

|   |             |             |             |
|---|-------------|-------------|-------------|
| C | 2.39381900  | 0.28238200  | 0.95233400  |
| C | 1.51826900  | 1.40843100  | -0.89376900 |
| C | 2.55121600  | -0.90379500 | 0.28796000  |
| C | 1.49123100  | -1.72747200 | -0.16485600 |
| C | 0.13254500  | -1.50687700 | -0.28186800 |
| C | -0.80837400 | -0.42803700 | -0.09924400 |
| C | -0.77004700 | 0.97109900  | -0.02932900 |
| C | 0.34654500  | 1.80116800  | -0.30367100 |
| H | 1.46265300  | 0.50484400  | 1.45586200  |
| H | 3.26085000  | 0.86026600  | 1.26003600  |
| H | 1.56639300  | 0.48508800  | -1.45597100 |
| H | 2.29687900  | 2.13964300  | -1.09055500 |
| H | 3.55755700  | -1.22100000 | 0.01913000  |
| H | 1.79465000  | -2.71913400 | -0.49469900 |
| H | -0.39695900 | -2.41824100 | -0.55475800 |
| H | 0.27010600  | 2.83116600  | 0.04003200  |
| C | -2.05115000 | 1.69317600  | 0.34522400  |
| C | -2.15303300 | -0.96750900 | 0.00381900  |
| H | -2.48651000 | 1.30086100  | 1.26923800  |
| H | -1.86552200 | 2.76167100  | 0.47390300  |
| H | -2.80745000 | 1.57642300  | -0.43896900 |
| N | -3.22268200 | -1.40528400 | 0.08816500  |

3-CH<sub>3</sub>-4-NO<sub>2</sub>-substituted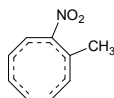

|   |             |             |             |
|---|-------------|-------------|-------------|
| C | 2.64103400  | 0.13084300  | 0.95909200  |
| C | 1.93902700  | 1.29348200  | -0.92544400 |
| C | 2.68841900  | -1.09158100 | 0.34218900  |
| C | 1.55452400  | -1.80303500 | -0.11408300 |
| C | 0.23364200  | -1.42325000 | -0.26138600 |
| C | -0.54269500 | -0.23605700 | -0.09886600 |
| C | -0.39804100 | 1.14427800  | -0.08461500 |
| C | 0.80671100  | 1.83662700  | -0.38032400 |
| H | 1.72678400  | 0.46235300  | 1.43348900  |
| H | 3.55594800  | 0.62442600  | 1.27475700  |
| H | 1.89196100  | 0.35197700  | -1.45664600 |
| H | 2.79578800  | 1.92699900  | -1.13526300 |
| H | 3.65976000  | -1.52657600 | 0.11329400  |
| H | 1.74473900  | -2.82887000 | -0.42256200 |
| H | -0.40712900 | -2.25568200 | -0.54634900 |
| H | 0.83266400  | 2.88330700  | -0.08192100 |
| C | -1.59161100 | 2.02333900  | 0.24867600  |
| H | -1.85921200 | 1.95063800  | 1.30652700  |
| H | -1.35946800 | 3.06358300  | 0.01344600  |
| H | -2.47725800 | 1.74443300  | -0.33107500 |
| N | -1.97959600 | -0.65507400 | 0.03794000  |
| O | -2.51011800 | -0.48867800 | 1.11952100  |
| O | -2.51906600 | -1.14369000 | -0.93761100 |

3- NH<sub>2</sub>-4-CH<sub>3</sub>-substituted

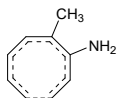

|   |             |             |             |
|---|-------------|-------------|-------------|
| C | -2.14077300 | -0.66225100 | 0.89062400  |
| C | -1.05381700 | -1.52320100 | -0.88081600 |
| C | -2.49348800 | 0.52133900  | 0.28124900  |
| C | -1.59187000 | 1.51085600  | -0.15439000 |
| C | -0.20135700 | 1.55089600  | -0.25188000 |
| C | 0.95062000  | 0.72597700  | -0.07885700 |
| C | 1.12017500  | -0.67104600 | -0.01643700 |
| C | 0.18365800  | -1.69272000 | -0.31387300 |
| H | -1.20862400 | -0.72780600 | 1.43507100  |
| H | -2.91074500 | -1.37438000 | 1.17708700  |
| H | -1.27074700 | -0.63062700 | -1.45278200 |
| H | -1.66060900 | -2.39643300 | -1.10164300 |
| H | -3.53950200 | 0.67678100  | 0.01889700  |
| H | -2.06372900 | 2.43078800  | -0.49552800 |
| H | 0.11199500  | 2.55897800  | -0.52206900 |
| H | 0.45172100  | -2.68646000 | 0.04563400  |
| N | 2.35919200  | -1.17443300 | 0.42316800  |
| H | 3.13857600  | -0.53474300 | 0.43860300  |
| H | 2.62039200  | -2.06377500 | 0.01793000  |
| C | 2.24032600  | 1.52857800  | 0.05551200  |
| H | 2.66092300  | 1.44585200  | 1.06708800  |
| H | 3.01080100  | 1.20159300  | -0.65547600 |
| H | 2.06435200  | 2.59069500  | -0.12178400 |

3- NH<sub>2</sub>-4-NH<sub>2</sub>-substituted

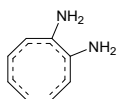

|   |             |             |             |
|---|-------------|-------------|-------------|
| C | -2.07677800 | -0.71435500 | 0.92141900  |
| C | -0.96247200 | -1.59385400 | -0.90450100 |
| C | -2.49466600 | 0.44126600  | 0.30864800  |
| C | -1.64046900 | 1.46167600  | -0.16156400 |
| C | -0.26053600 | 1.55018100  | -0.28947300 |
| C | 0.91109400  | 0.75863200  | -0.07908600 |
| C | 1.15170300  | -0.62579500 | -0.01248900 |
| C | 0.28174900  | -1.69247400 | -0.33930000 |
| H | -1.11384800 | -0.74561400 | 1.41354600  |
| H | -2.80396800 | -1.45657100 | 1.24058900  |
| H | -1.24439600 | -0.70754700 | -1.45761800 |
| H | -1.52929400 | -2.49650400 | -1.11073700 |
| H | -3.55148800 | 0.55264400  | 0.07081400  |
| H | -2.15423600 | 2.35312600  | -0.51739300 |
| H | 0.03215400  | 2.55265600  | -0.60666300 |
| H | 0.60910400  | -2.67632800 | -0.00071300 |
| N | 2.47948600  | -0.97946300 | 0.32243600  |
| H | 2.60027200  | -1.97189000 | 0.48541500  |
| N | 2.09224200  | 1.52221200  | 0.12598400  |
| H | 1.95657500  | 2.51934300  | 0.01685700  |

|   |            |             |             |
|---|------------|-------------|-------------|
| H | 2.88295500 | 1.19477400  | -0.42543500 |
| H | 2.85632900 | -0.42899100 | 1.09046900  |

### 3- NH<sub>2</sub>-4-OH-substituted

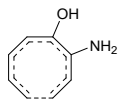

|   |             |             |             |
|---|-------------|-------------|-------------|
| C | 2.04612800  | 0.74350200  | 0.91233100  |
| C | 0.91617800  | 1.62039200  | -0.85023600 |
| C | 2.49764700  | -0.39020500 | 0.27649200  |
| C | 1.66822300  | -1.42727900 | -0.19376000 |
| C | 0.28591200  | -1.53772600 | -0.29306300 |
| C | -0.88484200 | -0.76256400 | -0.06954700 |
| C | -1.19567000 | 0.60368200  | -0.01664900 |
| C | -0.33422000 | 1.69265600  | -0.29197500 |
| H | 1.09684500  | 0.72350000  | 1.43160200  |
| H | 2.75220100  | 1.50313500  | 1.23747100  |
| H | 1.19874700  | 0.75920300  | -1.44183100 |
| H | 1.47198900  | 2.53512400  | -1.03260400 |
| H | 3.55398900  | -0.46250000 | 0.02225500  |
| H | 2.19357100  | -2.30273100 | -0.57058600 |
| H | -0.01039700 | -2.53740400 | -0.61858700 |
| H | -0.68018500 | 2.65341100  | 0.08887100  |
| N | -2.48976500 | 0.94935000  | 0.40310900  |
| H | -3.14016600 | 0.17454800  | 0.40425000  |
| H | -2.87025200 | 1.76200700  | -0.06452600 |
| O | -2.04004900 | -1.53986500 | 0.05346200  |
| H | -1.81374000 | -2.38957400 | 0.45266500  |

### 3- NH<sub>2</sub>-4-F-substituted

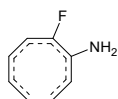

|   |             |             |             |
|---|-------------|-------------|-------------|
| C | 2.05725300  | 0.78304000  | 0.87960600  |
| C | 0.84631400  | 1.64032100  | -0.85085300 |
| C | 2.51172500  | -0.33956500 | 0.23031500  |
| C | 1.69738600  | -1.41786100 | -0.17442100 |
| C | 0.31786000  | -1.55859300 | -0.22594400 |
| C | -0.84194000 | -0.76885600 | -0.05950500 |
| C | -1.22079700 | 0.57237500  | -0.00428400 |
| C | -0.38769500 | 1.69014200  | -0.25823300 |
| H | 1.12930100  | 0.74254500  | 1.43505700  |
| H | 2.75232600  | 1.56783200  | 1.16553900  |
| H | 1.12449800  | 0.78583700  | -1.45495000 |
| H | 1.39229500  | 2.56043300  | -1.03448900 |
| H | 3.55863900  | -0.38432100 | -0.06636400 |
| H | 2.23259800  | -2.30125900 | -0.51609300 |
| H | 0.00337300  | -2.57576000 | -0.45629900 |
| H | -0.74608400 | 2.63646200  | 0.14520800  |
| N | -2.53128900 | 0.86114500  | 0.39863000  |
| H | -3.15209400 | 0.06301900  | 0.41644500  |
| H | -2.94716300 | 1.64965800  | -0.08028100 |
| F | -1.94547800 | -1.59761000 | 0.04841400  |

3- NH<sub>2</sub>-4-CHO-substituted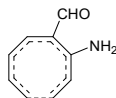

|   |             |             |             |
|---|-------------|-------------|-------------|
| C | 2.53379000  | 0.04633700  | 0.80234100  |
| C | 1.67940300  | 1.14651900  | -0.99804800 |
| C | 2.39003700  | -1.21174700 | 0.26907800  |
| C | 1.16749600  | -1.86050900 | -0.01702700 |
| C | -0.14096000 | -1.40707900 | -0.10899000 |
| C | -0.89903200 | -0.19904000 | -0.04154600 |
| C | -0.56499000 | 1.17668000  | 0.02714000  |
| C | 0.64713200  | 1.79169700  | -0.36454400 |
| H | 1.73468200  | 0.48193000  | 1.38521600  |
| H | 3.52718500  | 0.45235400  | 0.97498200  |
| H | 1.49978500  | 0.20804300  | -1.50759400 |
| H | 2.55910300  | 1.70499100  | -1.30279800 |
| H | 3.29109300  | -1.74211800 | -0.03859700 |
| H | 1.26837900  | -2.91773200 | -0.25495400 |
| H | -0.82870100 | -2.23245200 | -0.28714900 |
| H | 0.79912800  | 2.82022900  | -0.03851600 |
| N | -1.56448900 | 2.03974200  | 0.48330500  |
| H | -2.08775000 | 1.75047200  | 1.29850100  |
| H | -1.32627400 | 3.02202500  | 0.50182800  |
| C | -2.36881500 | -0.45989200 | -0.15003000 |
| H | -2.98292500 | 0.41678000  | -0.41805600 |
| O | -2.89583100 | -1.54756400 | -0.02577900 |

3-NH<sub>2</sub>-4-CN-substituted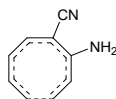

|   |             |             |             |
|---|-------------|-------------|-------------|
| C | 2.42865200  | 0.29517600  | 0.85890600  |
| C | 1.51976200  | 1.33291400  | -0.87144300 |
| C | 2.53450400  | -0.93842900 | 0.25494900  |
| C | 1.44912300  | -1.75539000 | -0.12094200 |
| C | 0.08469900  | -1.51158000 | -0.20519100 |
| C | -0.84242000 | -0.42757400 | -0.07903100 |
| C | -0.77093900 | 0.98819700  | -0.00746200 |
| C | 0.35813600  | 1.78844700  | -0.29356400 |
| H | 1.54943600  | 0.53007000  | 1.44305200  |
| H | 3.32711600  | 0.85259400  | 1.11020900  |
| H | 1.50602900  | 0.42407400  | -1.45967200 |
| H | 2.30969600  | 2.04090000  | -1.10392400 |
| H | 3.52312700  | -1.28720500 | -0.04110800 |
| H | 1.71993200  | -2.76378400 | -0.42598800 |
| H | -0.45994800 | -2.42739700 | -0.42980700 |
| H | 0.31750300  | 2.81318400  | 0.07196600  |
| C | -2.20126100 | -0.91682100 | -0.02003600 |
| N | -3.30437200 | -1.27192800 | 0.03639200  |
| N | -1.89239500 | 1.68658900  | 0.42021700  |
| H | -2.76123800 | 1.17511100  | 0.51332600  |
| H | -2.01582600 | 2.61019000  | 0.02855300  |

3-NH<sub>2</sub>-4-NO<sub>2</sub>-substituted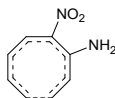

|   |             |             |             |
|---|-------------|-------------|-------------|
| C | 2.72197700  | 0.15718300  | 0.87131500  |
| C | 1.93340800  | 1.16221200  | -0.95521800 |
| C | 2.68038000  | -1.12005700 | 0.35775100  |
| C | 1.50709700  | -1.81728800 | 0.01036000  |
| C | 0.18581300  | -1.41083000 | -0.12913100 |
| C | -0.59482400 | -0.22793800 | -0.05554900 |
| C | -0.38994600 | 1.16934200  | -0.06945700 |
| C | 0.83545600  | 1.79027300  | -0.42041200 |
| H | 1.87283300  | 0.54260200  | 1.41854800  |
| H | 3.68001400  | 0.61889900  | 1.09564300  |
| H | 1.81870700  | 0.21569800  | -1.46801100 |
| H | 2.80022300  | 1.75523300  | -1.23006800 |
| H | 3.62103800  | -1.60919800 | 0.10795000  |
| H | 1.65252800  | -2.86692900 | -0.23387100 |
| H | -0.46290600 | -2.25498400 | -0.34898200 |
| H | 0.92451300  | 2.83941000  | -0.14199600 |
| N | -1.44309700 | 2.03286200  | 0.17566700  |
| H | -1.21371200 | 3.01588400  | 0.16358100  |
| N | -2.03819600 | -0.60991700 | 0.01265200  |
| H | -2.14342400 | 1.76004500  | 0.85062100  |
| O | -2.70698100 | -0.15929200 | 0.93385800  |
| O | -2.47513400 | -1.36504100 | -0.83255800 |

3-OH-4-CH<sub>3</sub>-substituted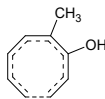

|   |             |             |             |
|---|-------------|-------------|-------------|
| C | -2.12870200 | -0.61579800 | 0.92048000  |
| C | -1.04394500 | -1.56856000 | -0.86611600 |
| C | -2.47591300 | 0.54167600  | 0.26826500  |
| C | -1.57113100 | 1.52113900  | -0.19581600 |
| C | -0.18412300 | 1.55966800  | -0.28064700 |
| C | 0.95598700  | 0.72400500  | -0.06953700 |
| C | 1.10362100  | -0.66363300 | -0.01591700 |
| C | 0.19413000  | -1.71066900 | -0.29774000 |
| H | -1.18189500 | -0.67967600 | 1.43975700  |
| H | -2.89824600 | -1.31546700 | 1.23620200  |
| H | -1.27684300 | -0.68492300 | -1.44485400 |
| H | -1.65092700 | -2.44866100 | -1.05524100 |
| H | -3.52182700 | 0.69249400  | 0.00358000  |
| H | -2.04340800 | 2.43160400  | -0.56090600 |
| H | 0.14530300  | 2.55755000  | -0.56913100 |
| H | 0.47874100  | -2.69609100 | 0.07540300  |
| O | 2.37023500  | -1.06273000 | 0.36297400  |
| H | 2.47759800  | -2.00703300 | 0.18734700  |
| C | 2.26542700  | 1.48393700  | 0.09437600  |
| H | 2.11857200  | 2.55371300  | -0.06720800 |
| H | 2.66719600  | 1.34727100  | 1.10422600  |

H 3.03175200 1.12046100 -0.59705300

3-OH-4-NH<sub>2</sub>-substituted

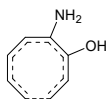

|   |             |             |             |
|---|-------------|-------------|-------------|
| C | -2.04671900 | -0.68475800 | 0.92998100  |
| C | -0.96844800 | -1.62677400 | -0.84997000 |
| C | -2.47566800 | 0.45456100  | 0.29315600  |
| C | -1.62283000 | 1.46406700  | -0.20482400 |
| C | -0.24568600 | 1.55077100  | -0.32790600 |
| C | 0.92605400  | 0.76540500  | -0.06974900 |
| C | 1.14495100  | -0.61567600 | -0.01724600 |
| C | 0.28836100  | -1.69740600 | -0.30262800 |
| H | -1.08474100 | -0.69027700 | 1.42649600  |
| H | -2.76781700 | -1.42231000 | 1.27262100  |
| H | -1.25434000 | -0.76927600 | -1.44414300 |
| H | -1.52877900 | -2.54164500 | -1.01507700 |
| H | -3.53267600 | 0.55358600  | 0.05188800  |
| H | -2.13747200 | 2.34275300  | -0.59023500 |
| H | 0.06893800  | 2.53326700  | -0.68154400 |
| H | 0.62748300  | -2.66160100 | 0.08015400  |
| O | 2.43692700  | -0.94626300 | 0.37704900  |
| H | 2.65346500  | -1.83065500 | 0.05437500  |
| N | 2.08379600  | 1.56456600  | 0.03208500  |
| H | 1.96153400  | 2.39362000  | 0.59961100  |
| H | 2.91233600  | 1.04954700  | 0.29998600  |

3-OH-4-OH-substituted

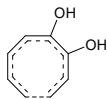

|   |             |             |             |
|---|-------------|-------------|-------------|
| C | -2.03017900 | -0.72298200 | 0.93271100  |
| C | -0.90039800 | -1.64127300 | -0.85778600 |
| C | -2.48001100 | 0.39667600  | 0.27838400  |
| C | -1.64835100 | 1.42641800  | -0.21304000 |
| C | -0.27036800 | 1.54004200  | -0.31427300 |
| C | 0.90779200  | 0.77488900  | -0.05708400 |
| C | 1.19278900  | -0.59125100 | -0.01558900 |
| C | 0.34873700  | -1.68946700 | -0.29751500 |
| H | -1.06775600 | -0.70601200 | 1.42768500  |
| H | -2.73424400 | -1.47673000 | 1.27485000  |
| H | -1.20266100 | -0.78552400 | -1.44652700 |
| H | -1.44669600 | -2.56432500 | -1.02402500 |
| H | -3.53717600 | 0.46904800  | 0.02871500  |
| H | -2.17649300 | 2.29376300  | -0.60469600 |
| H | 0.02469200  | 2.53236600  | -0.66228600 |
| H | 0.70197300  | -2.64782700 | 0.08687600  |
| O | 2.48157400  | -0.87479000 | 0.36409000  |
| H | 2.67721200  | -1.79637400 | 0.14787400  |
| O | 2.04835000  | 1.53779400  | 0.09056300  |
| H | 1.80168800  | 2.41926800  | 0.39946200  |



3-OH-4-F-substituted

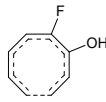

|   |             |             |             |
|---|-------------|-------------|-------------|
| C | 2.04369400  | 0.76600100  | 0.89937400  |
| C | 0.82495400  | 1.66176800  | -0.85888500 |
| C | 2.49542600  | -0.34064800 | 0.22845300  |
| C | 1.68030600  | -1.41608100 | -0.19345100 |
| C | 0.30507000  | -1.56339100 | -0.24478000 |
| C | -0.86334700 | -0.78332400 | -0.04848700 |
| C | -1.21800100 | 0.55920000  | -0.00268800 |
| C | -0.40535700 | 1.68877700  | -0.26121300 |
| H | 1.10324200  | 0.72599400  | 1.43376400  |
| H | 2.73657900  | 1.54699100  | 1.20012200  |
| H | 1.12024200  | 0.81166300  | -1.46027200 |
| H | 1.36428800  | 2.58850700  | -1.02623400 |
| H | 3.54261900  | -0.38206900 | -0.06705800 |
| H | 2.21974800  | -2.29224700 | -0.54716800 |
| H | -0.00754300 | -2.57693100 | -0.49248800 |
| H | -0.77005000 | 2.63121000  | 0.14928200  |
| O | -2.52012900 | 0.77745000  | 0.36276300  |
| H | -2.77087100 | 1.68018400  | 0.12412900  |
| F | -1.95041000 | -1.59852300 | 0.07487700  |

3-OH-4-CHO-substituted

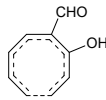

|   |             |             |             |
|---|-------------|-------------|-------------|
| C | 2.48609200  | -0.03866300 | 0.86476000  |
| C | 1.73655800  | 1.17162400  | -0.91916600 |
| C | 2.35033600  | -1.25628900 | 0.24652600  |
| C | 1.12710900  | -1.86638600 | -0.11943600 |
| C | -0.17130400 | -1.39109900 | -0.19366700 |
| C | -0.91075800 | -0.17645400 | -0.03911000 |
| C | -0.55068000 | 1.17928900  | 0.00770200  |
| C | 0.67834800  | 1.79822700  | -0.31219400 |
| H | 1.66394600  | 0.37703000  | 1.43110100  |
| H | 3.47506600  | 0.34348600  | 1.10384700  |
| H | 1.57420900  | 0.25961300  | -1.47860100 |
| H | 2.63201900  | 1.73669300  | -1.15823500 |
| H | 3.25523800  | -1.78018200 | -0.06008100 |
| H | 1.21922400  | -2.90802000 | -0.42132500 |
| H | -0.87520500 | -2.19280600 | -0.41215400 |
| H | 0.81371400  | 2.81565800  | 0.05607100  |
| O | -1.54159600 | 2.02461600  | 0.44647400  |
| H | -1.33084700 | 2.93401100  | 0.19358700  |
| C | -2.39324800 | -0.42447800 | 0.00313700  |
| H | -3.03210300 | 0.46933200  | 0.02132000  |
| O | -2.89715200 | -1.52829500 | -0.00982900 |

3-OH-4-CN-substituted

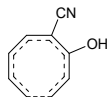

|   |             |             |             |
|---|-------------|-------------|-------------|
| C | 2.41186100  | 0.19272600  | 0.90761600  |
| C | 1.55634300  | 1.35432500  | -0.86265700 |
| C | 2.48333500  | -1.00810500 | 0.24789300  |
| C | 1.37523400  | -1.78159400 | -0.17054000 |
| C | 0.02190700  | -1.50349500 | -0.25049800 |
| C | -0.86868300 | -0.39077800 | -0.07714000 |
| C | -0.73240900 | 1.00296300  | -0.01253400 |
| C | 0.40040000  | 1.80325000  | -0.27805500 |
| H | 1.51754900  | 0.45643500  | 1.45601300  |
| H | 3.32189000  | 0.71250600  | 1.19456000  |
| H | 1.54711400  | 0.44937200  | -1.45582400 |
| H | 2.36746500  | 2.05046600  | -1.05207800 |
| H | 3.46402700  | -1.37808400 | -0.04818700 |
| H | 1.62390800  | -2.78643000 | -0.50520100 |
| H | -0.55290900 | -2.39203900 | -0.50488700 |
| H | 0.36696900  | 2.82133600  | 0.10965300  |
| C | -2.24565100 | -0.83263700 | 0.01511400  |
| N | -3.32589600 | -1.24550400 | 0.07714900  |
| O | -1.87154300 | 1.64726500  | 0.37486200  |
| H | -1.81642200 | 2.58692500  | 0.15182100  |

### 3-OH-4-NO<sub>2</sub>-substituted

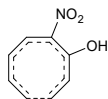

|   |             |             |             |
|---|-------------|-------------|-------------|
| C | -2.72625000 | 0.00763200  | -0.85644200 |
| C | -1.90252300 | 1.37176600  | 0.83637300  |
| C | -2.67315000 | -1.14988400 | -0.12627000 |
| C | -1.48829700 | -1.81790000 | 0.26553400  |
| C | -0.16348700 | -1.42233300 | 0.27574900  |
| C | 0.58360200  | -0.23129500 | 0.06585000  |
| C | 0.36819100  | 1.13220800  | -0.08168300 |
| C | -0.81964500 | 1.86059800  | 0.15871600  |
| H | -1.87470700 | 0.31677900  | -1.44794400 |
| H | -3.68480100 | 0.44201800  | -1.12656000 |
| H | -1.79902600 | 0.50753200  | 1.48066700  |
| H | -2.77073400 | 2.00168600  | 1.00240500  |
| H | -3.60703600 | -1.57836200 | 0.23450300  |
| H | -1.63632200 | -2.82740800 | 0.64261800  |
| H | 0.50524900  | -2.24439000 | 0.52494400  |
| H | -0.88300100 | 2.83551100  | -0.32291200 |
| N | 2.04615200  | -0.56269700 | 0.02945200  |
| O | 2.74159400  | -0.12049000 | 0.92257400  |
| O | 2.42902900  | -1.29159300 | -0.86591500 |
| O | 1.43910100  | 1.82112900  | -0.58420200 |
| H | 1.47887000  | 2.70839500  | -0.20050300 |

### 3-F-4-CH<sub>3</sub>-substituted

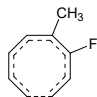

|   |             |             |             |
|---|-------------|-------------|-------------|
| C | -2.10823700 | -0.55373400 | 0.93408400  |
| C | -1.08676900 | -1.58800700 | -0.85151400 |
| C | -2.43738700 | 0.60182200  | 0.26962200  |
| C | -1.51764800 | 1.56140200  | -0.20934000 |
| C | -0.13266200 | 1.57451600  | -0.30030800 |
| C | 0.97528600  | 0.69882900  | -0.07412300 |
| C | 1.05123300  | -0.68493700 | -0.03015100 |
| C | 0.15811500  | -1.73807000 | -0.29805000 |
| H | -1.15809800 | -0.63259200 | 1.44504800  |
| H | -2.88897600 | -1.23330700 | 1.26504200  |
| H | -1.31945000 | -0.70988400 | -1.43781100 |
| H | -1.70601500 | -2.46347400 | -1.02173000 |
| H | -3.48151200 | 0.76880200  | 0.00890100  |
| H | -1.97622400 | 2.47638500  | -0.58072500 |
| H | 0.22610100  | 2.55911700  | -0.59846400 |
| H | 0.47976300  | -2.71174000 | 0.06457100  |
| F | 2.28077300  | -1.15529700 | 0.34458200  |
| C | 2.31652000  | 1.39789500  | 0.10505400  |
| H | 2.69550800  | 1.24940500  | 1.12155600  |
| H | 3.07456400  | 1.00441900  | -0.57832800 |
| H | 2.21667700  | 2.47224500  | -0.06094600 |

### 3-F-4-NH<sub>2</sub>-substituted

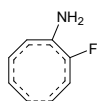

|   |             |             |             |
|---|-------------|-------------|-------------|
| C | -2.03710700 | -0.62598100 | 0.93460600  |
| C | -1.01896600 | -1.63145200 | -0.84119200 |
| C | -2.43660700 | 0.52447600  | 0.29710300  |
| C | -1.56179200 | 1.51235400  | -0.20657200 |
| C | -0.18456200 | 1.56821200  | -0.33786200 |
| C | 0.95490600  | 0.73852200  | -0.07485100 |
| C | 1.09369400  | -0.64613300 | -0.03048700 |
| C | 0.24522800  | -1.72460000 | -0.31202100 |
| H | -1.07529900 | -0.65860600 | 1.43006800  |
| H | -2.77864100 | -1.33987900 | 1.28315700  |
| H | -1.29589000 | -0.77279900 | -1.43717700 |
| H | -1.59522900 | -2.53757400 | -0.99950600 |
| H | -3.49138600 | 0.65062200  | 0.05984900  |
| H | -2.05820100 | 2.40233300  | -0.59003700 |
| H | 0.15962100  | 2.53956900  | -0.69361700 |
| H | 0.61077200  | -2.68373500 | 0.04902200  |
| F | 2.34927500  | -1.05416700 | 0.35397600  |
| N | 2.14734700  | 1.47827700  | 0.03467900  |
| H | 2.06331400  | 2.31426000  | 0.59904100  |
| H | 2.95726900  | 0.93299000  | 0.29832600  |

### 3-F-4-OH-substituted

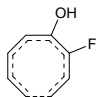

|   |             |             |             |
|---|-------------|-------------|-------------|
| C | -2.01868800 | -0.66265300 | 0.93873500  |
| C | -0.94871900 | -1.65157100 | -0.85161000 |
| C | -2.44190500 | 0.46619200  | 0.28203900  |
| C | -1.58890800 | 1.47656500  | -0.21487200 |
| C | -0.21101800 | 1.56062700  | -0.32534300 |
| C | 0.93619800  | 0.74975900  | -0.06328800 |
| C | 1.14094700  | -0.62352600 | -0.02682400 |
| C | 0.30576600  | -1.71894700 | -0.30332900 |
| H | -1.05518900 | -0.67123500 | 1.43155800  |
| H | -2.74159800 | -1.39562600 | 1.28615800  |
| H | -1.24183900 | -0.79481900 | -1.44281100 |
| H | -1.51127500 | -2.56624600 | -1.00966800 |
| H | -3.49748000 | 0.56295500  | 0.03508800  |
| H | -2.10087000 | 2.35434900  | -0.60499900 |
| H | 0.11399200  | 2.54131200  | -0.67830800 |
| H | 0.68536400  | -2.66902100 | 0.06669400  |
| F | 2.39017600  | -0.98872700 | 0.35367200  |
| O | 2.11071000  | 1.45162500  | 0.09022100  |
| H | 1.90960000  | 2.34519800  | 0.39842100  |

### 3-F-4-F-substituted

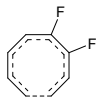

|   |             |             |             |
|---|-------------|-------------|-------------|
| C | 2.02588000  | 0.70892700  | 0.91368200  |
| C | 0.86337100  | 1.68267700  | -0.85157900 |
| C | 2.46071700  | -0.39901100 | 0.23429700  |
| C | 1.63023900  | -1.45773000 | -0.20268900 |
| C | 0.25480300  | -1.58305900 | -0.26411300 |
| C | -0.88586900 | -0.76496800 | -0.05365000 |
| C | -1.17103000 | 0.58772800  | -0.01556300 |
| C | -0.37465000 | 1.71929600  | -0.26950300 |
| H | 1.07956900  | 0.68570700  | 1.43863400  |
| H | 2.73219900  | 1.47190900  | 1.22854800  |
| H | 1.15912400  | 0.83416500  | -1.45409500 |
| H | 1.41309900  | 2.60533000  | -1.00723800 |
| H | 3.50863900  | -0.45643300 | -0.05481400 |
| H | 2.15882900  | -2.33849200 | -0.56161900 |
| H | -0.08303500 | -2.58527200 | -0.52356000 |
| H | -0.77218500 | 2.65242500  | 0.12315900  |
| F | -2.44154500 | 0.87905000  | 0.34663500  |
| F | -2.00478800 | -1.52710500 | 0.08288500  |

### 3-F-4-CHO-substituted

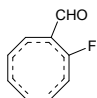

|   |             |             |             |
|---|-------------|-------------|-------------|
| C | 2.43880200  | -0.09759500 | 0.90255600  |
| C | 1.78700800  | 1.18464000  | -0.89297600 |
| C | 2.30564100  | -1.29688900 | 0.25099200  |
| C | 1.08321000  | -1.88373000 | -0.15878400 |
| C | -0.20654100 | -1.39240300 | -0.23790300 |
| C | -0.90845600 | -0.15987500 | -0.04543800 |
| C | -0.49812700 | 1.17019700  | -0.01409600 |
| C | 0.71651700  | 1.81094500  | -0.30730000 |
| H | 1.60363400  | 0.32276000  | 1.44637400  |
| H | 3.42427900  | 0.26575300  | 1.18098800  |
| H | 1.63706900  | 0.27716300  | -1.46226800 |
| H | 2.69213900  | 1.74629100  | -1.10188400 |
| H | 3.21130700  | -1.82569600 | -0.04331500 |
| H | 1.16949000  | -2.91860100 | -0.48481500 |
| H | -0.92820300 | -2.17136600 | -0.47924700 |
| H | 0.80143700  | 2.83457800  | 0.04853800  |
| F | -1.44734300 | 2.06189700  | 0.38918400  |
| C | -2.39819100 | -0.35627100 | 0.05268800  |
| H | -3.00455500 | 0.55304500  | 0.17268000  |
| O | -2.93746100 | -1.43938900 | -0.00976700 |

### 3-F-4-CN-substituted

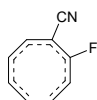

|   |             |             |             |
|---|-------------|-------------|-------------|
| C | 2.37352700  | 0.14320200  | 0.94202200  |
| C | 1.59275500  | 1.38177000  | -0.83897500 |
| C | 2.44681500  | -1.03984400 | 0.25340100  |
| C | 1.34045800  | -1.79837500 | -0.20090100 |
| C | -0.00827200 | -1.51290900 | -0.29156700 |
| C | -0.87330900 | -0.38315700 | -0.08976100 |
| C | -0.68832800 | 0.99494900  | -0.03326600 |
| C | 0.42342500  | 1.81851800  | -0.27250700 |
| H | 1.46880000  | 0.41078100  | 1.47142600  |
| H | 3.28221700  | 0.64740900  | 1.25896400  |
| H | 1.60357500  | 0.48375400  | -1.44165800 |
| H | 2.40696400  | 2.08211600  | -0.99655000 |
| H | 3.42969500  | -1.41064600 | -0.03324300 |
| H | 1.59000500  | -2.79710000 | -0.55314300 |
| H | -0.59559400 | -2.38620400 | -0.56802400 |
| H | 0.33681500  | 2.83320200  | 0.10736400  |
| C | -2.26167300 | -0.77887000 | 0.02738100  |
| N | -3.35579600 | -1.14668300 | 0.11498200  |
| F | -1.78936600 | 1.69019600  | 0.33055800  |

### 3-F-4-NO<sub>2</sub>-substituted

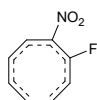

|   |             |             |             |
|---|-------------|-------------|-------------|
| C | -2.69371800 | -0.03794000 | -0.89265600 |
| C | -1.93974600 | 1.38562000  | 0.80960600  |
| C | -2.64308600 | -1.17143500 | -0.12784800 |
| C | -1.46019800 | -1.81823700 | 0.30942800  |

|   |             |             |             |
|---|-------------|-------------|-------------|
| C | -0.13887400 | -1.41882600 | 0.33411600  |
| C | 0.60017500  | -0.22701700 | 0.08594100  |
| C | 0.33618800  | 1.12266400  | -0.05778400 |
| C | -0.84008200 | 1.86512000  | 0.15374200  |
| H | -1.83120600 | 0.27348700  | -1.46707800 |
| H | -3.65079600 | 0.37666300  | -1.19645900 |
| H | -1.85903700 | 0.52694300  | 1.46332700  |
| H | -2.80866300 | 2.02169200  | 0.94543200  |
| H | -3.58005800 | -1.60003500 | 0.22419000  |
| H | -1.61139700 | -2.81721500 | 0.71258300  |
| H | 0.53306800  | -2.22700500 | 0.61464600  |
| H | -0.85961300 | 2.84312200  | -0.32060200 |
| N | 2.06426900  | -0.53390000 | 0.01638100  |
| O | 2.40454100  | -1.41282400 | -0.75464000 |
| O | 2.80659100  | 0.07874200  | 0.75665400  |
| F | 1.35608900  | 1.86806900  | -0.53267600 |

### 3-CHO-4-CH<sub>3</sub>-substituted

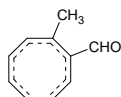

|   |             |             |             |
|---|-------------|-------------|-------------|
| C | -1.95986400 | -1.23162600 | 0.93285300  |
| C | -0.79672600 | -1.63749400 | -1.06345300 |
| C | -2.73434500 | -0.22717000 | 0.41097300  |
| C | -2.25407400 | 1.03228400  | -0.00608100 |
| C | -0.97769900 | 1.54648300  | -0.20435200 |
| C | 0.39048000  | 1.12746700  | -0.12048300 |
| C | 0.97776900  | -0.14787500 | -0.13060700 |
| C | 0.42268900  | -1.40653900 | -0.49260200 |
| H | -1.00584400 | -1.00579500 | 1.38887100  |
| H | -2.40508200 | -2.18707200 | 1.19745600  |
| H | -1.35663300 | -0.83858300 | -1.53203000 |
| H | -1.08606200 | -2.65206400 | -1.32260500 |
| H | -3.78555400 | -0.43057700 | 0.21446600  |
| H | -3.03769400 | 1.74918600  | -0.24780900 |
| H | -1.03808000 | 2.60676700  | -0.44370000 |
| H | 1.03553900  | -2.26371100 | -0.22229200 |
| C | 2.39463100  | -0.26104100 | 0.33564000  |
| H | 2.85418000  | 0.64555200  | 0.76334100  |
| O | 3.03691900  | -1.29067400 | 0.31802400  |
| C | 1.33893600  | 2.32871800  | -0.04215000 |
| H | 1.60864000  | 2.56181200  | 0.99499800  |
| H | 2.26067900  | 2.18268800  | -0.60848700 |
| H | 0.84977300  | 3.21794200  | -0.44483000 |

### 3-CHO-4-NH<sub>2</sub>-substituted

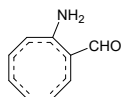

|   |             |             |             |
|---|-------------|-------------|-------------|
| C | -1.88154100 | -1.29892900 | 0.88383700  |
| C | -0.74588300 | -1.62203500 | -1.12045600 |
| C | -2.70412000 | -0.28827600 | 0.44879200  |
| C | -2.26812800 | 1.00046800  | 0.07955600  |
| C | -1.01712400 | 1.54946600  | -0.16551600 |

|   |             |             |             |
|---|-------------|-------------|-------------|
| C | 0.35824500  | 1.14320800  | -0.13665000 |
| C | 0.98884500  | -0.12217700 | -0.13108200 |
| C | 0.47609600  | -1.37343100 | -0.55604400 |
| H | -0.92800400 | -1.06511000 | 1.33739900  |
| H | -2.29443200 | -2.27772400 | 1.11339200  |
| H | -1.32841900 | -0.82547500 | -1.56705100 |
| H | -1.01024600 | -2.63601300 | -1.40593200 |
| H | -3.75503400 | -0.50879900 | 0.27281600  |
| H | -3.07502000 | 1.70698700  | -0.11058000 |
| H | -1.09497500 | 2.60864300  | -0.41108900 |
| H | 1.11106700  | -2.22072500 | -0.30348700 |
| C | 2.35363500  | -0.18569700 | 0.45087300  |
| H | 2.65949300  | 0.69204900  | 1.04715500  |
| O | 3.09184900  | -1.14851000 | 0.36343900  |
| N | 1.24652200  | 2.22368000  | -0.09510100 |
| H | 0.84158400  | 3.14704700  | -0.03174200 |
| H | 2.05338600  | 2.18585600  | -0.70254100 |

### 3-CHO-4-OH-substituted

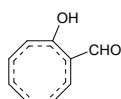

|   |             |             |             |
|---|-------------|-------------|-------------|
| C | -1.86972500 | -1.26920100 | 0.93319800  |
| C | -0.69238000 | -1.69147900 | -1.01386500 |
| C | -2.71442200 | -0.32234300 | 0.40680400  |
| C | -2.30041100 | 0.95220700  | -0.03018100 |
| C | -1.04691700 | 1.51037500  | -0.23105600 |
| C | 0.32629200  | 1.12356800  | -0.12074000 |
| C | 1.01259000  | -0.09729800 | -0.12861600 |
| C | 0.52362300  | -1.38523500 | -0.46701000 |
| H | -0.93790100 | -0.96477700 | 1.39155200  |
| H | -2.24992000 | -2.24478500 | 1.22326600  |
| H | -1.28308800 | -0.93548300 | -1.51514700 |
| H | -0.93407900 | -2.72572900 | -1.24095600 |
| H | -3.75145900 | -0.58894200 | 0.21427300  |
| H | -3.11161100 | 1.62680700  | -0.29935800 |
| H | -1.11556200 | 2.55970600  | -0.52332800 |
| H | 1.18611500  | -2.19917700 | -0.17902100 |
| C | 2.43833600  | -0.07764100 | 0.31557200  |
| H | 2.82449200  | 0.88131300  | 0.69049300  |
| O | 3.14791300  | -1.06334900 | 0.30832300  |
| O | 1.17806500  | 2.20704000  | -0.05983900 |
| H | 0.70327100  | 2.98382400  | 0.26572300  |

### 3-CHO-4-F-substituted

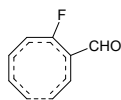

|   |             |             |             |
|---|-------------|-------------|-------------|
| C | -1.91291500 | -1.24897600 | 0.92802200  |
| C | -0.65596200 | -1.71395300 | -0.98599900 |
| C | -2.73327800 | -0.31595600 | 0.34806000  |
| C | -2.31199500 | 0.97027100  | -0.05371200 |
| C | -1.05127400 | 1.52503400  | -0.19456600 |

|   |             |             |             |
|---|-------------|-------------|-------------|
| C | 0.29811500  | 1.09073600  | -0.10655000 |
| C | 1.02016700  | -0.09751600 | -0.11878300 |
| C | 0.54487300  | -1.40329900 | -0.41432500 |
| H | -0.99672500 | -0.93701100 | 1.41290500  |
| H | -2.29765900 | -2.22513300 | 1.20918500  |
| H | -1.23042400 | -0.96232700 | -1.51248300 |
| H | -0.90520300 | -2.75034900 | -1.19366500 |
| H | -3.75964500 | -0.58993200 | 0.11251800  |
| H | -3.11447300 | 1.65632800  | -0.31855600 |
| H | -1.06670900 | 2.59244100  | -0.40590800 |
| H | 1.20658600  | -2.20605700 | -0.09594500 |
| C | 2.46203300  | -0.02501700 | 0.27105800  |
| H | 2.85560700  | 0.96378700  | 0.54995000  |
| O | 3.17895700  | -1.00246400 | 0.30906800  |
| F | 1.10204300  | 2.19889100  | -0.02997600 |

### 3-CHO-4-CHO-substituted

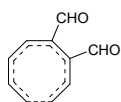

|   |             |             |             |
|---|-------------|-------------|-------------|
| C | -2.37220800 | -0.90256100 | 0.92864800  |
| C | -1.28231800 | -1.57317200 | -1.11734800 |
| C | -2.83490800 | 0.26262000  | 0.38578900  |
| C | -2.03707300 | 1.37684200  | 0.02129900  |
| C | -0.67360200 | 1.54052900  | -0.14532100 |
| C | 0.51736600  | 0.74802000  | -0.08694500 |
| C | 0.78277800  | -0.63064800 | -0.11768800 |
| C | -0.06754200 | -1.69998700 | -0.50871500 |
| H | -1.39316200 | -0.95015500 | 1.38495200  |
| H | -3.05703000 | -1.71233200 | 1.16493600  |
| H | -1.59648600 | -0.63431600 | -1.55527100 |
| H | -1.84358400 | -2.45850300 | -1.40171600 |
| H | -3.89660400 | 0.33936600  | 0.15654900  |
| H | -2.60537400 | 2.27979300  | -0.19589200 |
| H | -0.41366200 | 2.57906700  | -0.33974500 |
| H | 0.28606900  | -2.69388300 | -0.24468100 |
| C | 2.10305900  | -1.10632200 | 0.42125100  |
| H | 2.69729700  | -0.38340500 | 1.00710300  |
| O | 2.49344200  | -2.24743800 | 0.31610500  |
| C | 1.74806000  | 1.62691000  | -0.12870400 |
| H | 2.70391800  | 1.12016500  | -0.34696900 |
| O | 1.73367700  | 2.83004000  | -0.00896300 |

### 3-CHO-4-CN-substituted

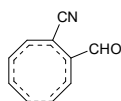

|   |             |             |             |
|---|-------------|-------------|-------------|
| C | -2.34466900 | -0.80289000 | 0.96254500  |
| C | -1.30248100 | -1.56309800 | -1.01595100 |
| C | -2.85464700 | 0.32130300  | 0.37136200  |
| C | -2.08611500 | 1.43224300  | -0.05041500 |
| C | -0.72476100 | 1.61411800  | -0.21338700 |
| C | 0.47457200  | 0.82317300  | -0.11874600 |
| C | 0.78133700  | -0.54389000 | -0.13741900 |



|   |             |             |             |
|---|-------------|-------------|-------------|
| C | -0.06351000 | -1.64038800 | -0.44574800 |
| H | -1.36712300 | -0.78115900 | 1.42578500  |
| H | -2.99728300 | -1.62245400 | 1.24960300  |
| H | -1.63150200 | -0.65877600 | -1.51111600 |
| H | -1.85237400 | -2.47144300 | -1.24460900 |
| H | -3.91881200 | 0.35559800  | 0.14548100  |
| H | -2.66760300 | 2.31476200  | -0.31011000 |
| H | -0.48029200 | 2.65060600  | -0.43698100 |
| H | 0.32874300  | -2.61263200 | -0.15626400 |
| C | 1.62008000  | 1.71816300  | -0.02754200 |
| N | 2.49174100  | 2.47821300  | 0.03454600  |
| C | 2.17829000  | -0.94926100 | 0.24512800  |
| H | 2.89356600  | -0.13728200 | 0.45692800  |
| O | 2.52274000  | -2.10519400 | 0.34006200  |

### 3-CHO-4-NO<sub>2</sub>-substituted

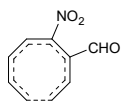

|   |             |             |             |
|---|-------------|-------------|-------------|
| C | -1.70495100 | 1.50946700  | 1.03390900  |
| C | -2.99720900 | -0.65589900 | -0.27989600 |
| C | -2.03225000 | -1.61437400 | 0.12029100  |
| C | -0.65629700 | -1.56185900 | 0.22844400  |
| C | 0.36012300  | -0.56957100 | 0.10565900  |
| C | 0.46979200  | 0.81452300  | 0.06948200  |
| C | -0.53571400 | 1.76932000  | 0.38364900  |
| H | -1.77090400 | 0.66487300  | -1.41824600 |
| H | -3.52173200 | 1.19963800  | -1.19571700 |
| H | -1.86358500 | 0.57239700  | 1.55253500  |
| H | -2.39196400 | 2.31866700  | 1.26342100  |
| H | -4.02838600 | -0.86809100 | -0.00369300 |
| H | -2.44561700 | -2.57691100 | 0.41518600  |
| H | -0.22377100 | -2.53389100 | 0.45019300  |
| H | -0.33473200 | 2.77931300  | 0.03531700  |
| N | 1.69967100  | -1.25876000 | 0.07297400  |
| O | 2.57723800  | -0.80958100 | 0.78924900  |
| O | 1.81975300  | -2.22962500 | -0.65089500 |
| C | 1.73790600  | 1.43199200  | -0.46739800 |
| H | 2.45239800  | 0.76677600  | -0.97836900 |
| O | 1.94269400  | 2.62132700  | -0.41816800 |

### 3-CN-4-CH<sub>3</sub>-substituted

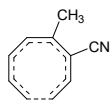

|   |             |             |             |
|---|-------------|-------------|-------------|
| C | -2.10126400 | -0.94783000 | 0.99007700  |
| C | -1.03091800 | -1.67219700 | -0.94796700 |
| C | -2.72171400 | 0.12190200  | 0.39691900  |
| C | -2.05758400 | 1.26988800  | -0.08634200 |
| C | -0.71497000 | 1.57545100  | -0.26455500 |
| C | 0.56598500  | 0.94843100  | -0.13774900 |
| C | 0.94884100  | -0.40021900 | -0.13945600 |
| C | 0.22984200  | -1.59649300 | -0.42523700 |

|   |             |             |             |
|---|-------------|-------------|-------------|
| H | -1.12249000 | -0.82723000 | 1.43545800  |
| H | -2.67987800 | -1.80625700 | 1.31978200  |
| H | -1.46566500 | -0.82780900 | -1.46486200 |
| H | -1.47369900 | -2.64470100 | -1.14096100 |
| H | -3.79111400 | 0.06340600  | 0.20255700  |
| H | -2.72029400 | 2.08122700  | -0.38352000 |
| H | -0.59476700 | 2.62350900  | -0.53357700 |
| H | 0.72282500  | -2.51975600 | -0.12717400 |
| C | 2.33567700  | -0.65908800 | 0.18691500  |
| N | 3.43986500  | -0.89118900 | 0.45121600  |
| C | 1.71356100  | 1.94417500  | -0.00417600 |
| H | 2.18985500  | 1.84806200  | 0.97780600  |
| H | 2.49181800  | 1.77214700  | -0.75413700 |
| H | 1.35961100  | 2.97160900  | -0.10046800 |

### 3-CN-4-NH<sub>2</sub>-substituted

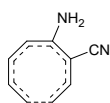

|   |             |             |             |
|---|-------------|-------------|-------------|
| C | -2.02766400 | -1.00128900 | 0.95395300  |
| C | -1.01745800 | -1.66284200 | -0.94787100 |
| C | -2.69637400 | 0.08926800  | 0.44360300  |
| C | -2.05941500 | 1.25167000  | -0.03149100 |
| C | -0.73056100 | 1.57017000  | -0.26791800 |
| C | 0.56419000  | 0.96038600  | -0.15043300 |
| C | 0.97235600  | -0.39460200 | -0.14361500 |
| C | 0.26395600  | -1.58019900 | -0.46396400 |
| H | -1.05462700 | -0.86306700 | 1.40841100  |
| H | -2.58207700 | -1.87995100 | 1.27253900  |
| H | -1.45814900 | -0.82433500 | -1.47023500 |
| H | -1.44430000 | -2.64007400 | -1.15124300 |
| H | -3.76955200 | 0.02017200  | 0.27944100  |
| H | -2.73708400 | 2.05875700  | -0.30577600 |
| H | -0.61255200 | 2.60761700  | -0.57931100 |
| H | 0.76814300  | -2.50337600 | -0.18421900 |
| C | 2.34970800  | -0.61850100 | 0.21434800  |
| N | 3.46228800  | -0.77496600 | 0.50377000  |
| N | 1.57722000  | 1.91428300  | -0.11795700 |
| H | 1.37376800  | 2.77248500  | 0.37510700  |
| H | 2.52744500  | 1.59218700  | 0.01493300  |

### 3-CN-4-OH-substituted

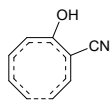

|   |             |             |             |
|---|-------------|-------------|-------------|
| C | -2.01258300 | -1.02343000 | 0.97518900  |
| C | -0.92814200 | -1.70073100 | -0.94550200 |
| C | -2.69952900 | 0.02517300  | 0.41429500  |
| C | -2.09382500 | 1.20552000  | -0.06392100 |
| C | -0.76906200 | 1.55695700  | -0.26680100 |
| C | 0.52523600  | 0.96325600  | -0.13783400 |
| C | 1.00396800  | -0.35210800 | -0.14248000 |
| C | 0.33562200  | -1.57113500 | -0.43692500 |
| H | -1.04081500 | -0.85529300 | 1.42161300  |

|   |             |             |             |
|---|-------------|-------------|-------------|
| H | -2.54312800 | -1.91353200 | 1.30173500  |
| H | -1.39780500 | -0.88005100 | -1.47096500 |
| H | -1.32999200 | -2.69178500 | -1.13196400 |
| H | -3.76655900 | -0.08225500 | 0.23158000  |
| H | -2.78991800 | 1.98908900  | -0.35831200 |
| H | -0.66707000 | 2.59825400  | -0.57637100 |
| H | 0.86987300  | -2.47051000 | -0.13790700 |
| C | 2.39782500  | -0.50947000 | 0.19966300  |
| N | 3.50396200  | -0.71124600 | 0.47741900  |
| O | 1.54600400  | 1.87413900  | -0.05612500 |
| H | 1.21259100  | 2.72750500  | 0.25355400  |

### 3-CN-4-F-substituted

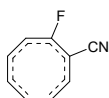

|   |             |             |             |
|---|-------------|-------------|-------------|
| C | -2.05025700 | -1.00127200 | 0.96615700  |
| C | -0.89050600 | -1.72667200 | -0.92151500 |
| C | -2.71425100 | 0.02950400  | 0.35305200  |
| C | -2.09896400 | 1.22220100  | -0.08724700 |
| C | -0.76779700 | 1.57041100  | -0.23107600 |
| C | 0.49664500  | 0.93414400  | -0.12434800 |
| C | 1.01406900  | -0.35661300 | -0.12438000 |
| C | 0.35654100  | -1.59284000 | -0.38042100 |
| H | -1.09326300 | -0.82361100 | 1.44049900  |
| H | -2.58641200 | -1.89177900 | 1.28135600  |
| H | -1.34210500 | -0.91215600 | -1.47247300 |
| H | -1.30191600 | -2.71693000 | -1.08979900 |
| H | -3.77206300 | -0.08726200 | 0.12662000  |
| H | -2.78462300 | 2.01669500  | -0.37535300 |
| H | -0.61188200 | 2.62270900  | -0.46072800 |
| H | 0.88688500  | -2.48154100 | -0.04581300 |
| C | 2.41855600  | -0.46548700 | 0.18903200  |
| N | 3.53880400  | -0.61450700 | 0.44015700  |
| F | 1.47217000  | 1.87724100  | -0.03565900 |

### 3-CN-4-CHO-substituted

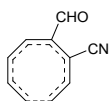

|   |             |             |             |
|---|-------------|-------------|-------------|
| C | -2.43629100 | -0.69505000 | 0.96575900  |
| C | -1.47923000 | -1.55731400 | -1.01070700 |
| C | -2.79004700 | 0.49096600  | 0.38213200  |
| C | -1.88246700 | 1.49774600  | -0.02955400 |
| C | -0.50893500 | 1.50361100  | -0.18796500 |
| C | 0.59196600  | 0.59483800  | -0.09567000 |
| C | 0.70826800  | -0.80103900 | -0.13193800 |
| C | -0.25451000 | -1.79930800 | -0.45510600 |
| H | -1.46597200 | -0.80779400 | 1.43092600  |
| H | -3.19458700 | -1.42109800 | 1.24576200  |
| H | -1.68888000 | -0.61217400 | -1.49288900 |
| H | -2.13681100 | -2.38758700 | -1.24944700 |
| H | -3.84070600 | 0.66664900  | 0.15714500  |
| H | -2.34851100 | 2.44994400  | -0.27718700 |

|   |             |             |             |
|---|-------------|-------------|-------------|
| H | -0.12661400 | 2.50224600  | -0.39291000 |
| H | 0.00617400  | -2.81923900 | -0.18223000 |
| C | 1.98918000  | -1.39435000 | 0.20688200  |
| N | 2.96924800  | -1.94666400 | 0.48274500  |
| C | 1.90922300  | 1.33493500  | -0.00503900 |
| H | 2.80900300  | 0.71026600  | 0.12038800  |
| O | 2.01490300  | 2.53690400  | -0.07144200 |

### 3-CN-4-CN-substituted

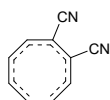

|   |             |             |             |
|---|-------------|-------------|-------------|
| C | -2.40849300 | -0.64779400 | 0.99817200  |
| C | -1.45081700 | -1.55889000 | -0.96266900 |
| C | -2.81102500 | 0.50263500  | 0.37671300  |
| C | -1.94462000 | 1.52657600  | -0.07742700 |
| C | -0.57379700 | 1.57753500  | -0.24537400 |
| C | 0.54777000  | 0.68426200  | -0.13539600 |
| C | 0.71941400  | -0.70664400 | -0.13393300 |
| C | -0.21494000 | -1.74298300 | -0.41138400 |
| H | -1.42930100 | -0.71111800 | 1.45460300  |
| H | -3.13745100 | -1.38889300 | 1.31381800  |
| H | -1.69443500 | -0.63896500 | -1.47706200 |
| H | -2.08678900 | -2.41563300 | -1.16304700 |
| H | -3.86897600 | 0.63345500  | 0.15692300  |
| H | -2.44345700 | 2.45282400  | -0.35587400 |
| H | -0.23097300 | 2.58057300  | -0.49064000 |
| H | 0.08397400  | -2.74268800 | -0.10589200 |
| C | 1.78406100  | 1.43918100  | -0.04426200 |
| N | 2.74228300  | 2.08517200  | 0.02278900  |
| C | 2.03910800  | -1.20110000 | 0.19120900  |
| N | 3.07020800  | -1.65749000 | 0.45339500  |

### 3-CN-4-NO<sub>2</sub>-substituted

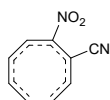

|   |             |             |             |
|---|-------------|-------------|-------------|
| C | -2.67250000 | 0.51697400  | -0.99321100 |
| C | -1.84393500 | 1.47874200  | 0.99190600  |
| C | -2.94890800 | -0.69271400 | -0.41412900 |
| C | -1.97265500 | -1.61817300 | 0.02194800  |
| C | -0.60707300 | -1.50084500 | 0.20487900  |
| C | 0.37083200  | -0.47126200 | 0.10878600  |
| C | 0.42077900  | 0.91722200  | 0.15374200  |
| C | -0.63319800 | 1.82590900  | 0.46533300  |
| H | -1.70438500 | 0.70007700  | -1.44131900 |
| H | -3.47737200 | 1.18152100  | -1.29394700 |
| H | -1.98171500 | 0.52186700  | 1.47692800  |
| H | -2.57735900 | 2.24898900  | 1.20933000  |
| H | -3.98645500 | -0.95065900 | -0.21112100 |
| H | -2.35522100 | -2.60379200 | 0.27867500  |
| H | -0.13267000 | -2.44682400 | 0.45513700  |
| H | -0.44816900 | 2.86378900  | 0.19994700  |
| C | 1.67440900  | 1.59073400  | -0.10456000 |

|   |            |             |             |
|---|------------|-------------|-------------|
| N | 2.62582500 | 2.22718300  | -0.27437100 |
| N | 1.72556800 | -1.10753500 | -0.02239200 |
| O | 2.35099600 | -0.86700000 | -1.03310000 |
| O | 2.08364000 | -1.83700400 | 0.88254300  |

3-NO<sub>2</sub>-4-CH<sub>3</sub>-substituted

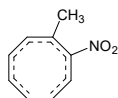

|   |             |             |             |
|---|-------------|-------------|-------------|
| C | -2.24816400 | -1.04380200 | 1.04149600  |
| C | -1.17910000 | -1.72176700 | -0.91321600 |
| C | -2.97390000 | -0.04565900 | 0.44267200  |
| C | -2.42983400 | 1.13583700  | -0.10693200 |
| C | -1.12987800 | 1.54852300  | -0.36384800 |
| C | 0.20873300  | 1.05231000  | -0.23840500 |
| C | 0.67256100  | -0.25745300 | -0.18742200 |
| C | 0.08811600  | -1.52010100 | -0.43976800 |
| H | -1.26916100 | -0.83459800 | 1.45134700  |
| H | -2.74677500 | -1.93301500 | 1.41775200  |
| H | -1.70371000 | -0.93543600 | -1.43785800 |
| H | -1.53676500 | -2.73531800 | -1.06584500 |
| H | -4.04112500 | -0.19835000 | 0.29204700  |
| H | -3.17353200 | 1.87111900  | -0.41030000 |
| H | -1.11654800 | 2.58254700  | -0.70425800 |
| H | 0.67769300  | -2.38238800 | -0.13926900 |
| N | 2.10053100  | -0.41687000 | 0.20707600  |
| O | 2.79501100  | -1.14972400 | -0.47588000 |
| O | 2.48192300  | 0.16386600  | 1.20831000  |
| C | 1.24183300  | 2.17595200  | -0.23595000 |
| H | 1.39940600  | 2.55467600  | 0.77824500  |
| H | 2.21228100  | 1.87075900  | -0.63134800 |
| H | 0.87684200  | 3.00191700  | -0.85124100 |

3-NO<sub>2</sub>-4-NH<sub>2</sub>-substituted

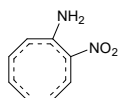

|   |             |             |             |
|---|-------------|-------------|-------------|
| C | 2.18522000  | -1.21239500 | -0.82218100 |
| C | 1.20574500  | -1.48428800 | 1.15932600  |
| C | 2.94985000  | -0.11111000 | -0.49496900 |
| C | 2.41589400  | 1.14207900  | -0.14981100 |
| C | 1.13293600  | 1.59340600  | 0.12843900  |
| C | -0.23213300 | 1.12730700  | 0.13671900  |
| C | -0.71722000 | -0.20408800 | 0.23230500  |
| C | -0.06854400 | -1.38058200 | 0.65951600  |
| H | 1.22070200  | -1.07049400 | -1.29261700 |
| H | 2.66602100  | -2.16784300 | -1.01607200 |
| H | 1.71018300  | -0.62196100 | 1.57490700  |
| H | 1.55926000  | -2.45685400 | 1.48639400  |
| H | 4.02096200  | -0.23779100 | -0.35387000 |
| H | 3.16300100  | 1.92044100  | -0.00225500 |
| H | 1.13506900  | 2.65896300  | 0.35386300  |
| H | -0.60930300 | -2.29775000 | 0.45036000  |

|   |             |             |             |
|---|-------------|-------------|-------------|
| N | -2.10840000 | -0.47599800 | -0.17480500 |
| O | -2.34520700 | -1.55061500 | -0.70107600 |
| O | -2.98235200 | 0.36342800  | 0.02822000  |
| N | -1.11417500 | 2.18030300  | 0.08358000  |
| H | -0.81122800 | 3.02141600  | -0.38333000 |
| H | -2.10666600 | 1.99726800  | 0.10797700  |

3-NO<sub>2</sub>-4-OH-substituted

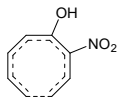

|   |             |             |             |
|---|-------------|-------------|-------------|
| C | -2.23046800 | -1.17096400 | 0.85884000  |
| C | -1.16912900 | -1.55129000 | -1.06823200 |
| C | -2.99062900 | -0.10635200 | 0.42491300  |
| C | -2.44955000 | 1.14103500  | 0.07050700  |
| C | -1.14998600 | 1.58043000  | -0.13697300 |
| C | 0.19905100  | 1.09853700  | -0.12190600 |
| C | 0.72611200  | -0.21601700 | -0.19041000 |
| C | 0.08929100  | -1.42841200 | -0.54065400 |
| H | -1.28997400 | -0.98146500 | 1.36069600  |
| H | -2.70128900 | -2.12472700 | 1.08174800  |
| H | -1.65213700 | -0.71100700 | -1.54956700 |
| H | -1.52999500 | -2.53855400 | -1.33808200 |
| H | -4.05142900 | -0.25555800 | 0.23633300  |
| H | -3.18639900 | 1.91998700  | -0.11766100 |
| H | -1.10018400 | 2.65218300  | -0.31680600 |
| H | 0.62682400  | -2.32995700 | -0.26824300 |
| N | 2.14469600  | -0.41713900 | 0.15354100  |
| O | 2.50988900  | -1.52396800 | 0.49504900  |
| O | 2.93423100  | 0.53190100  | 0.07861200  |
| O | 1.02652000  | 2.16092700  | -0.05344200 |
| H | 1.95844500  | 1.85638500  | -0.10145900 |

3-NO<sub>2</sub>-4-F-substituted

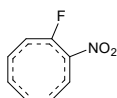

|   |             |             |             |
|---|-------------|-------------|-------------|
| C | 2.22897300  | 1.04624300  | 1.04695100  |
| C | 1.06912300  | 1.78012500  | -0.86689000 |
| C | 2.97904000  | 0.09988900  | 0.40051700  |
| C | 2.46366000  | -1.10415500 | -0.13200200 |
| C | 1.16882100  | -1.53617300 | -0.35254800 |
| C | -0.14482300 | -1.01021200 | -0.22986600 |
| C | -0.72175400 | 0.24577800  | -0.16397500 |
| C | -0.17813800 | 1.53437500  | -0.36813300 |
| H | 1.26766300  | 0.78308800  | 1.46988400  |
| H | 2.69227800  | 1.95129200  | 1.42922300  |
| H | 1.59675700  | 1.02208000  | -1.43041400 |
| H | 1.41291500  | 2.80326800  | -0.97900400 |
| H | 4.03291200  | 0.29952900  | 0.21798400  |
| H | 3.21472200  | -1.82536300 | -0.44829700 |
| H | 1.10079000  | -2.57081200 | -0.68286500 |
| H | -0.78613300 | 2.36310900  | -0.01433600 |

|   |             |             |              |
|---|-------------|-------------|--------------|
| N | -2.15981700 | 0.27715700  | 0.20027200   |
| O | -2.86849100 | 1.02832000  | -0.44787200  |
| O | -2.52747100 | -0.39402500 | 1.14395100   |
| F | -1.04832200 | -2.01954200 | -0.28189300C |

3-NO<sub>2</sub>-4-CHO-substituted

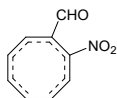

|   |             |             |             |
|---|-------------|-------------|-------------|
| C | -2.49090900 | -0.94551600 | 1.03757700  |
| C | -1.46891400 | -1.70784000 | -1.01421200 |
| C | -3.04391700 | 0.14927500  | 0.43653000  |
| C | -2.32800700 | 1.27785000  | -0.03900300 |
| C | -0.98396800 | 1.50730200  | -0.26663700 |
| C | 0.25044800  | 0.78734400  | -0.19208600 |
| C | 0.54672800  | -0.57094700 | -0.19117000 |
| C | -0.21189000 | -1.72839400 | -0.48502700 |
| H | -1.49008300 | -0.90348900 | 1.44658100  |
| H | -3.11662700 | -1.77027400 | 1.36682700  |
| H | -1.85968700 | -0.81826600 | -1.48987700 |
| H | -1.98991200 | -2.64057000 | -1.20599700 |
| H | -4.11735100 | 0.15251800  | 0.25472800  |
| H | -2.95489000 | 2.13171400  | -0.28966000 |
| H | -0.78602300 | 2.54400900  | -0.52949300 |
| H | 0.22788000  | -2.67744000 | -0.19227500 |
| N | 1.92921800  | -0.92666100 | 0.23871200  |
| O | 2.47332600  | -1.85898800 | -0.32558300 |
| O | 2.41786800  | -0.28767200 | 1.15626200  |
| C | 1.44118900  | 1.72906300  | -0.29097700 |
| H | 2.40331000  | 1.28520300  | -0.59122400 |
| O | 1.34809200  | 2.92096000  | -0.13199900 |

3-NO<sub>2</sub>-4-CN-substituted

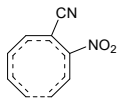

|   |             |             |             |
|---|-------------|-------------|-------------|
| C | -2.52540100 | -0.82214700 | 1.03191000  |
| C | -1.50492400 | -1.62191500 | -0.97378300 |
| C | -3.07255600 | 0.26546200  | 0.40996000  |
| C | -2.34619900 | 1.37847800  | -0.08182700 |
| C | -0.99823400 | 1.59528800  | -0.29171600 |
| C | 0.23002000  | 0.85414100  | -0.17025100 |
| C | 0.53117300  | -0.50393900 | -0.16415700 |
| C | -0.24546400 | -1.64943600 | -0.44732100 |
| H | -1.53186600 | -0.77068600 | 1.45778900  |
| H | -3.15606400 | -1.63951100 | 1.36979200  |
| H | -1.87907200 | -0.74072200 | -1.47701200 |
| H | -2.03251000 | -2.55314100 | -1.15451800 |
| H | -4.14360100 | 0.26905700  | 0.21639300  |
| H | -2.96116200 | 2.22984700  | -0.36622500 |
| H | -0.78981200 | 2.62149900  | -0.58545600 |
| H | 0.18841900  | -2.60055900 | -0.15258400 |
| C | 1.35704400  | 1.77064900  | -0.17505700 |
| N | 2.18314300  | 2.57794500  | -0.24269700 |

|   |            |             |             |
|---|------------|-------------|-------------|
| N | 1.92444500 | -0.86804200 | 0.22150600  |
| O | 2.44505300 | -1.77754300 | -0.39941100 |
| O | 2.42992200 | -0.27053100 | 1.15111300  |

### 3-NO<sub>2</sub>-4-NO<sub>2</sub>-substituted

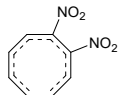

|   |             |             |             |
|---|-------------|-------------|-------------|
| C | -2.80010900 | -0.67479700 | 1.01078100  |
| C | -1.79718800 | -1.62231100 | -1.02210600 |
| C | -3.19601300 | 0.45237300  | 0.35339900  |
| C | -2.33535500 | 1.47863800  | -0.11812700 |
| C | -0.96814400 | 1.54350200  | -0.29120000 |
| C | 0.13601400  | 0.65118200  | -0.17058500 |
| C | 0.31371300  | -0.71692600 | -0.14523000 |
| C | -0.58031400 | -1.77694000 | -0.43171100 |
| H | -1.81128200 | -0.74940900 | 1.44391500  |
| H | -3.53089700 | -1.40825600 | 1.33949100  |
| H | -2.06394300 | -0.70432500 | -1.52924900 |
| H | -2.42296200 | -2.48928000 | -1.20846200 |
| H | -4.25396000 | 0.57798400  | 0.13086500  |
| H | -2.84524600 | 2.39280000  | -0.41511000 |
| H | -0.62979600 | 2.53803600  | -0.56865900 |
| H | -0.27172300 | -2.76078400 | -0.09046600 |
| N | 1.42087300  | 1.43856300  | -0.20466600 |
| O | 2.29552600  | 1.03285500  | -0.94494700 |
| O | 1.46968500  | 2.44798900  | 0.46646000  |
| N | 1.63279200  | -1.21758900 | 0.34003300  |
| O | 2.13273700  | -0.64279000 | 1.28831500  |
| O | 2.07936900  | -2.20704100 | -0.20498200 |

### 5.3.15 3,5-substituted

#### 3-CH<sub>3</sub>-5-CH<sub>3</sub>-substituted

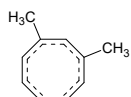

|   |             |             |             |
|---|-------------|-------------|-------------|
| C | -0.53850200 | 2.03092900  | -0.84205200 |
| C | 0.73503000  | 1.69945900  | 0.99192100  |
| C | -1.70826400 | 1.53112500  | -0.32065100 |
| C | -1.95311100 | 0.17895200  | 0.00109700  |
| C | -1.12364900 | -0.93839900 | 0.04601900  |
| C | 0.28830800  | -1.14675400 | -0.09886800 |
| C | 1.48429100  | -0.44036200 | -0.00379500 |
| C | 1.69082500  | 0.89395800  | 0.42223500  |
| H | 0.12808100  | 1.37441200  | -1.38525700 |
| H | -0.45029700 | 3.09210000  | -1.05917900 |
| H | -0.12055900 | 1.24944600  | 1.47825000  |
| H | 0.99105000  | 2.70864600  | 1.30291600  |
| H | -2.49159300 | 2.23519600  | -0.04204000 |
| H | -2.98999900 | -0.02911400 | 0.25958100  |
| H | 2.66525600  | 1.32819400  | 0.19627000  |
| C | 2.75140000  | -1.17996000 | -0.40020500 |
| H | 2.54458800  | -2.20411000 | -0.71965500 |



|   |             |             |             |
|---|-------------|-------------|-------------|
| H | 3.25158700  | -0.66667200 | -1.23010400 |
| H | 3.46323600  | -1.21904400 | 0.43159500  |
| H | 0.47891000  | -2.20301100 | -0.29892100 |
| C | -1.85357400 | -2.26589500 | 0.24014600  |
| H | -2.92815900 | -2.12470500 | 0.37557700  |
| H | -1.71043900 | -2.91176900 | -0.63456400 |
| H | -1.46817300 | -2.80789300 | 1.11044900  |

### 3-CH<sub>3</sub>-5-NH<sub>2</sub>-substituted

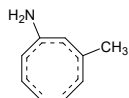

|   |             |             |             |
|---|-------------|-------------|-------------|
| C | 0.70311500  | 1.96527900  | 0.85188100  |
| C | -0.57877400 | 1.73035300  | -0.99585300 |
| C | 1.82975900  | 1.36422100  | 0.33866000  |
| C | 1.96450700  | 0.01040600  | -0.02067800 |
| C | 1.04583100  | -1.04117300 | -0.04466800 |
| C | -0.37750200 | -1.13629600 | 0.13496100  |
| C | -1.50767400 | -0.33982900 | -0.00299700 |
| C | -1.60888600 | 0.99837900  | -0.45584200 |
| H | -0.02667500 | 1.37182300  | 1.38626900  |
| H | 0.71302400  | 3.02885900  | 1.07298700  |
| H | 0.25208700  | 1.21822600  | -1.46380000 |
| H | -0.75423900 | 2.75406500  | -1.31575100 |
| H | 2.67070100  | 2.00183700  | 0.06783100  |
| H | 2.97137700  | -0.27587200 | -0.32283000 |
| H | -2.55342000 | 1.50373900  | -0.25445100 |
| C | -2.82977600 | -0.96627100 | 0.40815300  |
| H | -2.70700700 | -1.99474300 | 0.75520200  |
| H | -3.28944000 | -0.39243600 | 1.22156400  |
| H | -3.53903200 | -0.96832600 | -0.42675200 |
| H | -0.62794600 | -2.16078200 | 0.41091600  |
| N | 1.61525200  | -2.33101100 | -0.17704600 |
| H | 2.61172700  | -2.33587100 | -0.35364900 |
| H | 1.12848000  | -2.94385900 | -0.81991300 |

### 3-CH<sub>3</sub>-5-OH-substituted

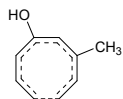

|   |             |             |             |
|---|-------------|-------------|-------------|
| C | 0.82146000  | 1.91718000  | 0.85997100  |
| C | -0.51833800 | 1.75446900  | -0.97466900 |
| C | 1.90410500  | 1.26888100  | 0.31674900  |
| C | 1.96608600  | -0.09582700 | -0.02915600 |
| C | 0.98682600  | -1.08312100 | -0.06157500 |
| C | -0.43458600 | -1.13969300 | 0.08556300  |
| C | -1.52674600 | -0.28713800 | -0.00404600 |
| C | -1.56555200 | 1.06952800  | -0.41100800 |
| H | 0.07267300  | 1.35540000  | 1.40234400  |
| H | 0.88062300  | 2.97929700  | 1.07957900  |
| H | 0.27646200  | 1.20753100  | -1.46567100 |
| H | -0.64600200 | 2.79126400  | -1.27346400 |
| H | 2.76859800  | 1.86451100  | 0.02652800  |

|   |             |             |             |
|---|-------------|-------------|-------------|
| H | 2.95397900  | -0.44309600 | -0.33355600 |
| H | -2.47761800 | 1.61781100  | -0.17512200 |
| C | -2.87132700 | -0.86632000 | 0.39953000  |
| H | -3.25933300 | -0.34830800 | 1.28499500  |
| H | -3.60977500 | -0.74083500 | -0.39917300 |
| H | -2.80316700 | -1.92969600 | 0.63922300  |
| H | -0.71325600 | -2.17379500 | 0.28043400  |
| O | 1.44777100  | -2.37506600 | -0.25545600 |
| H | 2.40307700  | -2.40730400 | -0.11061900 |

### 3-CH<sub>3</sub>-5-F-substituted

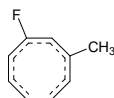

|   |             |             |             |
|---|-------------|-------------|-------------|
| C | 0.98188000  | 1.85174400  | 0.84959000  |
| C | -0.41088200 | 1.76949500  | -0.97627100 |
| C | 2.01463000  | 1.13426800  | 0.30056600  |
| C | 1.97536600  | -0.24100900 | -0.01286500 |
| C | 0.90802000  | -1.11409000 | -0.05946100 |
| C | -0.50887600 | -1.11815600 | 0.06484900  |
| C | -1.54693000 | -0.19977500 | 0.00333800  |
| C | -1.48900000 | 1.16286300  | -0.38571400 |
| H | 0.20293500  | 1.34028700  | 1.39948900  |
| H | 1.10306700  | 2.91128200  | 1.05577500  |
| H | 0.33863200  | 1.16823600  | -1.47535600 |
| H | -0.46568300 | 2.81387000  | -1.26986000 |
| H | 2.91689600  | 1.66483800  | 0.00110400  |
| H | 2.91903500  | -0.71394500 | -0.27300400 |
| H | -2.35425100 | 1.77448800  | -0.12985500 |
| C | -2.92413500 | -0.69622800 | 0.40251000  |
| H | -3.27909800 | -0.15983100 | 1.29070700  |
| H | -3.65303100 | -0.52146700 | -0.39561600 |
| H | -2.92135200 | -1.76286800 | 0.63735400  |
| H | -0.83849000 | -2.14223500 | 0.23306300  |
| F | 1.33676700  | -2.40748000 | -0.24367200 |

### 3-CH<sub>3</sub>-5-CHO-substituted

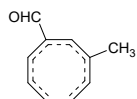

|   |             |             |             |
|---|-------------|-------------|-------------|
| C | -0.62463900 | 2.15578300  | 0.84460800  |
| C | -1.62453400 | 1.27792100  | -1.07218800 |
| C | 0.65357900  | 2.16788000  | 0.34595100  |
| C | 1.42803000  | 1.01933400  | 0.08409300  |
| C | 1.09540000  | -0.33010600 | 0.05578300  |
| C | -0.10228100 | -1.11496100 | 0.15253100  |
| C | -1.47153900 | -0.95745600 | 0.00214000  |
| C | -2.17865700 | 0.18595200  | -0.46242600 |
| H | -0.99290700 | 1.28204400  | 1.36538500  |
| H | -1.15263400 | 3.08787700  | 1.02658900  |
| H | -0.63564000 | 1.21701400  | -1.50673000 |
| H | -2.25689200 | 2.09192000  | -1.41512500 |
| H | 1.09681600  | 3.12329200  | 0.07008500  |

|   |             |             |             |
|---|-------------|-------------|-------------|
| H | 2.47951900  | 1.19944300  | -0.13434000 |
| H | -3.25026900 | 0.19957700  | -0.26001500 |
| C | -2.35307900 | -2.13823100 | 0.36872400  |
| H | -3.03622000 | -1.86779900 | 1.18283400  |
| H | -2.96943500 | -2.45052700 | -0.48106900 |
| H | -1.76706200 | -2.99893100 | 0.69906100  |
| H | 0.15150900  | -2.15217400 | 0.37925500  |
| C | 2.30639100  | -1.21664700 | -0.07438900 |
| H | 2.10556300  | -2.30056000 | 0.05114900  |
| O | 3.43195300  | -0.84099900 | -0.30575500 |

3-CH<sub>3</sub>-5-CN-substituted

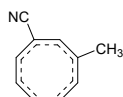

|   |             |             |             |
|---|-------------|-------------|-------------|
| C | 0.91884500  | 2.06110100  | -0.82540900 |
| C | 1.75743800  | 1.01831100  | 1.04905900  |
| C | -0.32612200 | 2.31885300  | -0.30780700 |
| C | -1.30221900 | 1.33935500  | -0.03597800 |
| C | -1.21651000 | -0.05265700 | -0.01613400 |
| C | -0.19382100 | -1.05926200 | -0.13628100 |
| C | 1.18462200  | -1.14941300 | -0.01505100 |
| C | 2.09677900  | -0.15769200 | 0.43491600  |
| H | 1.09570700  | 1.14195400  | -1.36772600 |
| H | 1.61399700  | 2.87470700  | -1.01247600 |
| H | 0.78550400  | 1.12748500  | 1.51192300  |
| H | 2.53162200  | 1.70351600  | 1.38257400  |
| H | -0.57265700 | 3.33770500  | -0.01553400 |
| H | -2.29110000 | 1.72527800  | 0.20109100  |
| H | 3.14880800  | -0.33835200 | 0.21294400  |
| C | 1.82302400  | -2.47249700 | -0.39707000 |
| H | 2.56713100  | -2.32340100 | -1.18815700 |
| H | 2.34308500  | -2.91865700 | 0.45739000  |
| H | 1.08729900  | -3.19193300 | -0.76242600 |
| H | -0.64954100 | -2.02451400 | -0.35075200 |
| C | -2.52540700 | -0.67041600 | 0.12447000  |
| N | -3.56566000 | -1.16684000 | 0.24040700  |

3-CH<sub>3</sub>-5-NO<sub>2</sub>-substituted

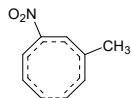

|   |             |             |             |
|---|-------------|-------------|-------------|
| C | 1.43595200  | 2.03939700  | -0.77361800 |
| C | 2.14994500  | 0.88751100  | 1.08490600  |
| C | 0.20838600  | 2.38902700  | -0.26820900 |
| C | -0.86167100 | 1.50000800  | -0.04448000 |
| C | -0.88713100 | 0.11684500  | -0.04438400 |
| C | 0.02261800  | -0.97422800 | -0.17444300 |
| C | 1.38687200  | -1.18574500 | -0.05199900 |
| C | 2.38126300  | -0.29553000 | 0.43506800  |
| H | 1.54316300  | 1.12698600  | -1.34479000 |
| H | 2.20072600  | 2.79633800  | -0.92260400 |
| H | 1.18984400  | 1.07538700  | 1.54715300  |

|   |             |             |             |
|---|-------------|-------------|-------------|
| H | 2.98367800  | 1.48549500  | 1.44189600  |
| H | 0.05113400  | 3.41469200  | 0.05928500  |
| H | -1.81698300 | 1.96142600  | 0.18087100  |
| H | 3.41402300  | -0.56392600 | 0.21076600  |
| C | 1.91119400  | -2.54065600 | -0.49245000 |
| H | 2.61381600  | -2.42702800 | -1.32667000 |
| H | 2.45045900  | -3.03620700 | 0.32152500  |
| H | 1.10674400  | -3.20187700 | -0.82084600 |
| H | -0.51744900 | -1.88357800 | -0.41719400 |
| N | -2.30838800 | -0.40060300 | 0.09251600  |
| O | -2.46368000 | -1.56193500 | 0.42694300  |
| O | -3.22944600 | 0.36652600  | -0.12686200 |

### 3- NH<sub>2</sub>-5-CH<sub>3</sub>-substituted

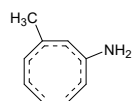

|   |             |             |             |
|---|-------------|-------------|-------------|
| C | -0.40828300 | 2.07852500  | -0.82354700 |
| C | 0.86271500  | 1.63403300  | 0.96716300  |
| C | -1.59607300 | 1.63010100  | -0.29122700 |
| C | -1.91747000 | 0.29284100  | 0.01734600  |
| C | -1.15750900 | -0.87813600 | 0.04205500  |
| C | 0.23050300  | -1.18185600 | -0.07982900 |
| C | 1.47127400  | -0.53859800 | -0.02053500 |
| C | 1.76989900  | 0.78411800  | 0.38362100  |
| H | 0.21353700  | 1.40157100  | -1.39370200 |
| H | -0.27619300 | 3.13710700  | -1.03169300 |
| H | -0.00016800 | 1.22584500  | 1.47825500  |
| H | 1.17400900  | 2.62965800  | 1.26972200  |
| H | -2.33648500 | 2.37274500  | 0.00587200  |
| H | -2.96096500 | 0.14526000  | 0.28862800  |
| H | 2.74765300  | 1.16563200  | 0.09260500  |
| N | 2.58986400  | -1.27606300 | -0.46350600 |
| H | 2.40680200  | -2.25587500 | -0.64125000 |
| H | 3.42060700  | -1.15936200 | 0.10417500  |
| H | 0.36520700  | -2.25539100 | -0.23356700 |
| C | -1.97737100 | -2.15481500 | 0.22386900  |
| H | -3.04312300 | -1.94331100 | 0.33307200  |
| H | -1.85713700 | -2.81177400 | -0.64588700 |
| H | -1.64889500 | -2.71694300 | 1.10480600  |

### 3- NH<sub>2</sub>-5-NH<sub>2</sub>-substituted

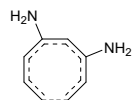

|   |             |             |             |
|---|-------------|-------------|-------------|
| C | -0.60529200 | 2.01018300  | -0.83567400 |
| C | 0.68255800  | 1.68726500  | 0.97334800  |
| C | -1.74882300 | 1.44488600  | -0.31324900 |
| C | -1.94010000 | 0.09792300  | 0.03773100  |
| C | -1.07034600 | -1.00028900 | 0.04069300  |
| C | 0.33879700  | -1.17125800 | -0.11863500 |
| C | 1.50803600  | -0.41549300 | -0.01338600 |
| C | 1.68070300  | 0.92067300  | 0.42248200  |
| H | 0.09094400  | 1.39903000  | -1.39434400 |

|   |             |             |             |
|---|-------------|-------------|-------------|
| H | -0.58627400 | 3.07473200  | -1.05249300 |
| H | -0.15356700 | 1.20490600  | 1.46407600  |
| H | 0.89987000  | 2.70518300  | 1.28436200  |
| H | -2.56008800 | 2.11435000  | -0.02743400 |
| H | -2.95248100 | -0.14326300 | 0.35864400  |
| H | 2.62658100  | 1.39005600  | 0.15684400  |
| N | 2.69097200  | -1.03061000 | -0.47074000 |
| H | 2.61316300  | -2.02269700 | -0.65584800 |
| H | 3.51293700  | -0.82373800 | 0.08326500  |
| H | 0.55112600  | -2.21361000 | -0.36172700 |
| N | -1.71054500 | -2.25885800 | 0.16295200  |
| H | -2.70845400 | -2.20716300 | 0.32266500  |
| H | -1.26994500 | -2.89484500 | 0.81664900  |

### 3- NH<sub>2</sub>-5-OH-substituted

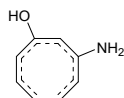

|   |             |             |             |
|---|-------------|-------------|-------------|
| C | -0.76301200 | 1.95597600  | -0.84229500 |
| C | 0.59406600  | 1.72452000  | 0.94709100  |
| C | -1.85225600 | 1.32263200  | -0.28800500 |
| C | -1.94585300 | -0.03873800 | 0.05250600  |
| C | -0.99364300 | -1.05980100 | 0.05706400  |
| C | 0.41580700  | -1.16749800 | -0.07411300 |
| C | 1.53688400  | -0.33725500 | -0.01514200 |
| C | 1.62457600  | 1.02160000  | 0.37509000  |
| H | -0.03889100 | 1.38686600  | -1.40988900 |
| H | -0.81246500 | 3.01939200  | -1.05875100 |
| H | -0.19734300 | 1.19282200  | 1.46055600  |
| H | 0.74603100  | 2.75977000  | 1.23821800  |
| H | -2.69931300 | 1.93617400  | 0.01754800  |
| H | -2.93354500 | -0.35948100 | 0.38392100  |
| H | 2.53139000  | 1.54792700  | 0.08143300  |
| N | 2.74841600  | -0.89657300 | -0.45695700 |
| H | 2.73061000  | -1.89792700 | -0.60351000 |
| H | 3.56419600  | -0.61362300 | 0.07174700  |
| H | 0.67213700  | -2.21410300 | -0.23410700 |
| O | -1.50529300 | -2.33555900 | 0.23743900  |
| H | -2.45880500 | -2.32595100 | 0.07884900  |

### 3- NH<sub>2</sub>-5-F-substituted

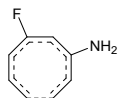

|   |             |             |             |
|---|-------------|-------------|-------------|
| C | -0.94272300 | 1.88947800  | -0.82475300 |
| C | 0.46113100  | 1.74588600  | 0.95003400  |
| C | -1.97851500 | 1.16931500  | -0.27678100 |
| C | -1.95765300 | -0.20564300 | 0.02619900  |
| C | -0.90352300 | -1.10246800 | 0.05121200  |
| C | 0.50491200  | -1.14210900 | -0.05399800 |
| C | 1.56206800  | -0.23144800 | -0.02151800 |
| C | 1.53512900  | 1.13428200  | 0.35536500  |
| H | -0.18164000 | 1.38399900  | -1.40414700 |

|   |             |             |             |
|---|-------------|-------------|-------------|
| H | -1.06747700 | 2.95071900  | -1.02082200 |
| H | -0.27813700 | 1.14962300  | 1.47064600  |
| H | 0.52721000  | 2.79010000  | 1.24032700  |
| H | -2.87301600 | 1.70661800  | 0.03536800  |
| H | -2.90323300 | -0.66313700 | 0.30467700  |
| H | 2.39090300  | 1.73425400  | 0.05003800  |
| N | 2.80997300  | -0.69852800 | -0.46230000 |
| H | 2.86976200  | -1.69668600 | -0.61826400 |
| H | 3.60592700  | -0.35313800 | 0.05921400  |
| H | 0.82462900  | -2.17526100 | -0.18361300 |
| F | -1.36329900 | -2.38679500 | 0.22979100  |

### 3- NH<sub>2</sub>-5-CHO-substituted

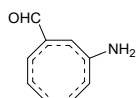

|   |             |             |             |
|---|-------------|-------------|-------------|
| C | 0.71860900  | 2.14491600  | -0.82015900 |
| C | 1.68745400  | 1.19445800  | 1.03434200  |
| C | -0.55915200 | 2.18297500  | -0.31428100 |
| C | -1.37268800 | 1.06159200  | -0.06439800 |
| C | -1.09174100 | -0.30300200 | -0.05122400 |
| C | 0.06153300  | -1.14034800 | -0.12599100 |
| C | 1.44700100  | -1.02751600 | -0.01649000 |
| C | 2.20909200  | 0.08877500  | 0.41923200  |
| H | 1.05446900  | 1.27947600  | -1.37523300 |
| H | 1.26435100  | 3.06872800  | -0.99277100 |
| H | 0.71204900  | 1.14907700  | 1.50112100  |
| H | 2.34498500  | 1.99354000  | 1.36349900  |
| H | -0.96920500 | 3.14763100  | -0.01826200 |
| H | -2.41441600 | 1.27792100  | 0.16448000  |
| H | 3.26574200  | 0.07653100  | 0.15489700  |
| N | 2.21983500  | -2.12903600 | -0.43165000 |
| H | 1.69064100  | -2.96252900 | -0.65597700 |
| H | 3.00563400  | -2.34682100 | 0.16926000  |
| H | -0.23038600 | -2.17823000 | -0.30212500 |
| C | -2.34073800 | -1.13964200 | 0.07541300  |
| H | -2.18053400 | -2.23319500 | -0.02660700 |
| O | -3.45479900 | -0.71776700 | 0.27757600  |

### 3-NH<sub>2</sub>-5-CN-substituted

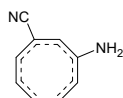

|   |             |             |             |
|---|-------------|-------------|-------------|
| C | 1.05005100  | 2.01343500  | -0.80074600 |
| C | 1.81985300  | 0.89712300  | 1.01164500  |
| C | -0.18618400 | 2.32260400  | -0.28189200 |
| C | -1.21289800 | 1.39658400  | -0.02216900 |
| C | -1.20473800 | -0.00230900 | -0.01546500 |
| C | -0.25566100 | -1.06794400 | -0.10789900 |
| C | 1.12845200  | -1.23173400 | -0.02561800 |
| C | 2.10491100  | -0.29459300 | 0.39735800  |
| H | 1.17884800  | 1.10534000  | -1.37417600 |
| H | 1.77670000  | 2.80102200  | -0.97987400 |

|   |             |             |             |
|---|-------------|-------------|-------------|
| H | 0.86688300  | 1.03665600  | 1.50575000  |
| H | 2.62844500  | 1.54698900  | 1.33261800  |
| H | -0.38087100 | 3.34901600  | 0.02454800  |
| H | -2.17842400 | 1.83213200  | 0.22298400  |
| H | 3.13372500  | -0.51698300 | 0.11806700  |
| N | 1.64870900  | -2.46227000 | -0.45879400 |
| H | 0.96031800  | -3.17256200 | -0.67416700 |
| H | 2.39966900  | -2.83456100 | 0.10930500  |
| H | -0.76394200 | -2.01715900 | -0.27167400 |
| C | -2.55031300 | -0.54076600 | 0.11733300  |
| N | -3.61759200 | -0.97834200 | 0.22327200  |

### 3-NH<sub>2</sub>-5-NO<sub>2</sub>-substituted

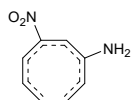

|   |             |             |             |
|---|-------------|-------------|-------------|
| C | 1.51785500  | 1.99411400  | -0.75411500 |
| C | 2.19164300  | 0.79811600  | 1.03779300  |
| C | 0.29742300  | 2.36921900  | -0.24016100 |
| C | -0.79729700 | 1.51498800  | -0.01756100 |
| C | -0.87009400 | 0.12971100  | -0.04091500 |
| C | -0.01312600 | -0.99204600 | -0.15140900 |
| C | 1.35536800  | -1.24837300 | -0.06364200 |
| C | 2.39153600  | -0.39528000 | 0.39342900  |
| H | 1.59475200  | 1.09828400  | -1.35560200 |
| H | 2.29421300  | 2.73949500  | -0.90264200 |
| H | 1.25072400  | 0.99544800  | 1.53485900  |
| H | 3.04530200  | 1.37632400  | 1.37881900  |
| H | 0.17278700  | 3.39474600  | 0.10270500  |
| H | -1.73213400 | 2.00424500  | 0.23039300  |
| H | 3.40404400  | -0.68283200 | 0.11363500  |
| N | 1.79476100  | -2.49428900 | -0.54186700 |
| H | 1.05920300  | -3.15423100 | -0.76211600 |
| H | 2.52583600  | -2.92874100 | 0.00787200  |
| H | -0.58585400 | -1.89272400 | -0.34921500 |
| N | -2.31635900 | -0.33456100 | 0.08752100  |
| O | -3.20264800 | 0.47240100  | -0.12670200 |
| O | -2.52454500 | -1.49374500 | 0.40185100  |

### 3-OH-5-CH<sub>3</sub>-substituted

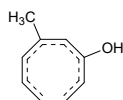

|   |             |             |             |
|---|-------------|-------------|-------------|
| C | -0.23649900 | 2.09359300  | -0.83561000 |
| C | 1.04696300  | 1.54783800  | 0.97004100  |
| C | -1.44193200 | 1.75374300  | -0.27220300 |
| C | -1.87839800 | 0.44803900  | 0.04543500  |
| C | -1.23078500 | -0.78460400 | 0.04386300  |
| C | 0.12548700  | -1.20123400 | -0.11817600 |
| C | 1.40384700  | -0.66651800 | -0.03402600 |
| C | 1.85249200  | 0.60976300  | 0.37728000  |
| H | 0.32594700  | 1.35511800  | -1.39117500 |
| H | -0.01467400 | 3.13441300  | -1.05536900 |
| H | 0.14644400  | 1.23475800  | 1.48208800  |

|   |             |             |             |
|---|-------------|-------------|-------------|
| H | 1.45888000  | 2.51000400  | 1.25946100  |
| H | -2.10862600 | 2.55970300  | 0.03362200  |
| H | -2.92636600 | 0.39590600  | 0.33434700  |
| H | 2.86551600  | 0.88871100  | 0.08582900  |
| O | 2.37570700  | -1.56009100 | -0.43796200 |
| H | 3.23989800  | -1.26837000 | -0.11783000 |
| H | 0.19873800  | -2.27104300 | -0.31719500 |
| C | -2.14958900 | -1.98989700 | 0.22386700  |
| H | -3.18904800 | -1.69132200 | 0.37582400  |
| H | -2.11232300 | -2.62935900 | -0.66596500 |
| H | -1.83955200 | -2.60211200 | 1.07722400  |

### 3-OH-5-NH<sub>2</sub>-substituted

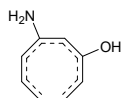

|   |             |             |             |
|---|-------------|-------------|-------------|
| C | -0.47633100 | 2.03908600  | -0.84837300 |
| C | 0.84269100  | 1.63155200  | 0.97848000  |
| C | -1.63738000 | 1.55616000  | -0.29217800 |
| C | -1.91945100 | 0.22411400  | 0.06743400  |
| C | -1.13681100 | -0.93434800 | 0.04091700  |
| C | 0.25605400  | -1.19475000 | -0.15878100 |
| C | 1.46089900  | -0.52418200 | -0.02813500 |
| C | 1.76266500  | 0.78634100  | 0.41337400  |
| H | 0.17965100  | 1.37648100  | -1.39748600 |
| H | -0.38716800 | 3.09853900  | -1.07142500 |
| H | -0.03382900 | 1.22203800  | 1.46418200  |
| H | 1.14300400  | 2.63031500  | 1.28078600  |
| H | -2.39402200 | 2.28158700  | 0.00668300  |
| H | -2.94145300 | 0.05700300  | 0.40502900  |
| H | 2.74575100  | 1.17447500  | 0.14614900  |
| O | 2.52841000  | -1.29296300 | -0.44091000 |
| H | 3.35448200  | -0.87990700 | -0.15570100 |
| H | 0.42885700  | -2.23335300 | -0.43780600 |
| N | -1.85402700 | -2.14316900 | 0.16207000  |
| H | -2.83860400 | -2.03895000 | 0.36920600  |
| H | -1.41976800 | -2.84618100 | 0.74674600  |

### 3-OH-5-OH-substituted

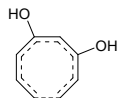

|   |             |             |             |
|---|-------------|-------------|-------------|
| C | -0.63327700 | 1.99669300  | -0.85137500 |
| C | 0.75563900  | 1.67721500  | 0.95626500  |
| C | -1.74568300 | 1.44097200  | -0.26931800 |
| C | -1.93337700 | 0.08606600  | 0.07238800  |
| C | -1.06382500 | -1.00168900 | 0.05533500  |
| C | 0.33503800  | -1.20156200 | -0.10942500 |
| C | 1.49518200  | -0.44943300 | -0.02835600 |
| C | 1.71175600  | 0.89248000  | 0.36765700  |
| H | 0.05405900  | 1.37795700  | -1.41314800 |
| H | -0.61285900 | 3.06060700  | -1.06907000 |
| H | -0.07890600 | 1.21435400  | 1.46740000  |



|   |             |             |             |
|---|-------------|-------------|-------------|
| H | 0.99084500  | 2.69970000  | 1.23543600  |
| H | -2.54226000 | 2.11213200  | 0.05044500  |
| H | -2.93966300 | -0.16122700 | 0.41081400  |
| H | 2.65797800  | 1.34232500  | 0.06649400  |
| O | 2.60365100  | -1.15813400 | -0.43157800 |
| H | 3.40543400  | -0.70422100 | -0.13862300 |
| H | 0.55116800  | -2.24909600 | -0.30657100 |
| O | -1.65420200 | -2.23846200 | 0.23506200  |
| H | -2.61012100 | -2.16421300 | 0.10991400  |

### 3-OH-5-F-substituted

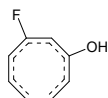

|   |             |             |             |
|---|-------------|-------------|-------------|
| C | -0.82432800 | 1.93336500  | -0.83681500 |
| C | 0.61590600  | 1.71530400  | 0.95890500  |
| C | -1.88817800 | 1.28825500  | -0.25928000 |
| C | -1.95629600 | -0.08762500 | 0.04938400  |
| C | -0.97099100 | -1.05471500 | 0.05068100  |
| C | 0.43176700  | -1.17962300 | -0.09371000 |
| C | 1.53000700  | -0.33790700 | -0.03574300 |
| C | 1.62691000  | 1.02102600  | 0.35045700  |
| H | -0.09217800 | 1.37311500  | -1.40344400 |
| H | -0.88051400 | 2.99873700  | -1.04070200 |
| H | -0.17164800 | 1.18148900  | 1.47520400  |
| H | 0.76288300  | 2.75395100  | 1.23812100  |
| H | -2.74026600 | 1.88450500  | 0.06369900  |
| H | -2.92798900 | -0.47721700 | 0.34119100  |
| H | 2.52706800  | 1.55283600  | 0.04197100  |
| O | 2.68979000  | -0.95624700 | -0.43809300 |
| H | 3.45480700  | -0.44470200 | -0.14116100 |
| H | 0.71531200  | -2.21487700 | -0.26959400 |
| F | -1.50606300 | -2.30514900 | 0.23290900  |

### 3-OH-5-CHO-substituted

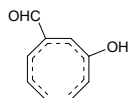

|   |             |             |             |
|---|-------------|-------------|-------------|
| C | 0.75925400  | 2.12043400  | -0.83060600 |
| C | 1.75193500  | 1.13308300  | 1.04277600  |
| C | -0.50363800 | 2.18860900  | -0.29988000 |
| C | -1.34533000 | 1.08501300  | -0.04524500 |
| C | -1.10190500 | -0.28348800 | -0.05700700 |
| C | 0.03387100  | -1.14172400 | -0.16754800 |
| C | 1.40885700  | -1.05725000 | -0.02963800 |
| C | 2.22507700  | 0.01173600  | 0.42046700  |
| H | 1.07335200  | 1.23753400  | -1.37130600 |
| H | 1.32635200  | 3.02895400  | -1.01413200 |
| H | 0.77261100  | 1.12866900  | 1.50252300  |
| H | 2.43973900  | 1.90785200  | 1.36729400  |
| H | -0.88589100 | 3.16232100  | 0.00288500  |
| H | -2.37870700 | 1.32719400  | 0.19623700  |
| H | 3.28309400  | -0.04348600 | 0.16214500  |

|   |             |             |             |
|---|-------------|-------------|-------------|
| O | 2.05711400  | -2.21061700 | -0.41505700 |
| H | 2.94860600  | -2.22934200 | -0.04168800 |
| H | -0.24704900 | -2.17212100 | -0.38872100 |
| C | -2.36679600 | -1.09743500 | 0.06465800  |
| H | -2.23133300 | -2.18940600 | -0.07320600 |
| O | -3.46570400 | -0.65338800 | 0.29882000  |

### 3-OH-5-CN-substituted

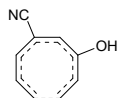

|   |             |             |             |
|---|-------------|-------------|-------------|
| C | 1.07551600  | 1.99044200  | -0.81251700 |
| C | 1.87760700  | 0.83403600  | 1.01664800  |
| C | -0.13875500 | 2.31312400  | -0.26076700 |
| C | -1.18471900 | 1.40453300  | 0.00335400  |
| C | -1.21159600 | 0.00963300  | -0.01679800 |
| C | -0.27838000 | -1.06780000 | -0.14763200 |
| C | 1.09138700  | -1.24721500 | -0.03948800 |
| C | 2.10916800  | -0.35976800 | 0.38897400  |
| H | 1.18616500  | 1.07350900  | -1.37607200 |
| H | 1.81372200  | 2.76536900  | -0.99847000 |
| H | 0.93355400  | 1.01256000  | 1.51417200  |
| H | 2.71252400  | 1.45707200  | 1.32205700  |
| H | -0.30830000 | 3.33944500  | 0.06027300  |
| H | -2.13644900 | 1.86062200  | 0.26497800  |
| H | 3.12909800  | -0.61819400 | 0.10357200  |
| O | 1.49105600  | -2.50067700 | -0.44021000 |
| H | 2.36791100  | -2.69978200 | -0.08467300 |
| H | -0.76969800 | -2.01574700 | -0.35626200 |
| C | -2.56575600 | -0.50472800 | 0.11721100  |
| N | -3.64340200 | -0.91471100 | 0.22545500  |

### 3-OH-5-NO<sub>2</sub>-substituted

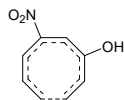

|   |             |             |             |
|---|-------------|-------------|-------------|
| C | 1.54302000  | 1.90567200  | -0.90008200 |
| C | 2.23404500  | 0.79563200  | 1.00008900  |
| C | 0.34387100  | 2.33402400  | -0.38859900 |
| C | -0.76527400 | 1.51620100  | -0.08755100 |
| C | -0.86771600 | 0.13697000  | -0.04950900 |
| C | -0.03576000 | -1.00698400 | -0.12240300 |
| C | 1.31510200  | -1.27593200 | 0.03043600  |
| C | 2.38577000  | -0.44332800 | 0.43844200  |
| H | 1.60640900  | 0.95739700  | -1.41717400 |
| H | 2.33037500  | 2.62402900  | -1.11059700 |
| H | 1.29997900  | 1.07009500  | 1.47189300  |
| H | 3.10890900  | 1.36926900  | 1.29012300  |
| H | 0.23923400  | 3.38437400  | -0.12316700 |
| H | -1.68372400 | 2.03643600  | 0.16107600  |
| H | 3.38898000  | -0.78937500 | 0.18870100  |
| O | 1.63106100  | -2.57143700 | -0.30342000 |
| H | 2.48976600  | -2.81177100 | 0.07029100  |
| H | -0.59722000 | -1.91343100 | -0.32696400 |
| N | -2.32205000 | -0.28820700 | 0.08363000  |

|   |             |             |             |
|---|-------------|-------------|-------------|
| O | -2.66275800 | -1.33472200 | -0.43390500 |
| O | -3.07414100 | 0.44577100  | 0.69800900  |

### 3-F-5-CH<sub>3</sub>-substituted

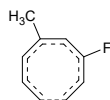

|   |             |             |             |
|---|-------------|-------------|-------------|
| C | 0.01592200  | 2.08725100  | -0.83815000 |
| C | 1.25121100  | 1.43657900  | 0.96320900  |
| C | -1.21944900 | 1.88838000  | -0.27116200 |
| C | -1.80721700 | 0.64331100  | 0.04751100  |
| C | -1.31221500 | -0.65621900 | 0.04667100  |
| C | -0.00681800 | -1.21044300 | -0.12981700 |
| C | 1.30441100  | -0.79474400 | -0.02372100 |
| C | 1.93130000  | 0.39495000  | 0.38314000  |
| H | 0.48955200  | 1.29175200  | -1.39782200 |
| H | 0.35288100  | 3.09622200  | -1.05945200 |
| H | 0.32132400  | 1.24765500  | 1.48225900  |
| H | 1.78508300  | 2.34030400  | 1.24102400  |
| H | -1.78668600 | 2.76651500  | 0.03545400  |
| H | -2.85394000 | 0.71595400  | 0.33735000  |
| H | 2.97752100  | 0.49782300  | 0.10645700  |
| F | 2.19965400  | -1.75221400 | -0.40952200 |
| H | -0.03588300 | -2.27772000 | -0.35225500 |
| C | -2.35544500 | -1.75257400 | 0.23377200  |
| H | -2.37848800 | -2.40708100 | -0.64545700 |
| H | -2.12075800 | -2.37961600 | 1.10031600  |
| H | -3.35769500 | -1.34083700 | 0.36911300  |

### 3-F-5-NH<sub>2</sub>-substituted

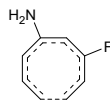

|   |             |             |             |
|---|-------------|-------------|-------------|
| C | -0.26791600 | 2.05493700  | -0.85343500 |
| C | 1.02499100  | 1.56548500  | 0.97507200  |
| C | -1.46791600 | 1.68846200  | -0.29175400 |
| C | -1.87975900 | 0.38977200  | 0.06970000  |
| C | -1.21733000 | -0.83834300 | 0.04580300  |
| C | 0.14827700  | -1.21569600 | -0.16682600 |
| C | 1.38733900  | -0.63366800 | -0.01831000 |
| C | 1.84939500  | 0.62086200  | 0.41687800  |
| H | 0.32041600  | 1.33096100  | -1.40132500 |
| H | -0.07699100 | 3.09993300  | -1.07966600 |
| H | 0.11288900  | 1.25872800  | 1.47008800  |
| H | 1.43203500  | 2.52893500  | 1.26720400  |
| H | -2.14830200 | 2.48466300  | 0.00908000  |
| H | -2.91305200 | 0.32487800  | 0.40810700  |
| H | 2.87843200  | 0.85841800  | 0.16085000  |
| F | 2.40396600  | -1.45270900 | -0.41876100 |
| H | 0.24035600  | -2.25893800 | -0.46555700 |
| N | -2.03720100 | -1.97830700 | 0.17144900  |
| H | -3.01081200 | -1.78598400 | 0.36823600  |
| H | -1.67274600 | -2.70992800 | 0.76890800  |

### 3-F-5-OH-substituted

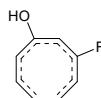

|   |             |             |             |
|---|-------------|-------------|-------------|
| C | -0.46562500 | 2.02131300  | -0.85603000 |
| C | 0.91232300  | 1.63754800  | 0.95061000  |
| C | -1.61505300 | 1.55694300  | -0.26693500 |
| C | -1.91146300 | 0.22007800  | 0.07515800  |
| C | -1.13440700 | -0.93223700 | 0.05898000  |
| C | 0.24864900  | -1.22411300 | -0.12058300 |
| C | 1.43727300  | -0.53747800 | -0.02019800 |
| C | 1.79608600  | 0.76544600  | 0.36967000  |
| H | 0.16896000  | 1.35090400  | -1.42059700 |
| H | -0.36145000 | 3.08002600  | -1.07447100 |
| H | 0.04227700  | 1.25731600  | 1.46992700  |
| H | 1.23795600  | 2.63746800  | 1.22040600  |
| H | -2.35231100 | 2.28992500  | 0.05847300  |
| H | -2.93487700 | 0.05505200  | 0.41287700  |
| H | 2.79312400  | 1.08791200  | 0.08180200  |
| F | 2.51154200  | -1.28326600 | -0.40398000 |
| H | 0.40340800  | -2.27870700 | -0.33692200 |
| O | -1.80635900 | -2.12369700 | 0.24381200  |
| H | -2.75679600 | -1.98592700 | 0.12979200  |

### 3-F-5-F-substituted

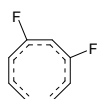

|   |             |             |             |
|---|-------------|-------------|-------------|
| C | -0.69058500 | 1.96359700  | -0.84221200 |
| C | 0.74914900  | 1.69933600  | 0.95286500  |
| C | -1.78899100 | 1.39005300  | -0.25479300 |
| C | -1.94681100 | 0.02040100  | 0.05391600  |
| C | -1.02933700 | -1.00797800 | 0.05478200  |
| C | 0.36575900  | -1.20495700 | -0.10434100 |
| C | 1.48575000  | -0.40896000 | -0.02815600 |
| C | 1.70783500  | 0.92799700  | 0.35064600  |
| H | 0.00074000  | 1.35809700  | -1.41379200 |
| H | -0.67980000 | 3.02996000  | -1.04749500 |
| H | -0.07286600 | 1.22843000  | 1.47605000  |
| H | 0.97067700  | 2.72726000  | 1.22221200  |
| H | -2.59677700 | 2.04095300  | 0.07563900  |
| H | -2.94182300 | -0.30421700 | 0.34730800  |
| H | 2.66260200  | 1.35303100  | 0.05185000  |
| F | 2.62426800  | -1.04930300 | -0.40842500 |
| H | 0.60395200  | -2.24812700 | -0.29935100 |
| F | -1.63130400 | -2.22428800 | 0.24079500  |

### 3-F-5-CHO-substituted

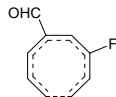

|   |             |             |             |
|---|-------------|-------------|-------------|
| C | 0.84266700  | 2.06444900  | -0.83809200 |
| C | 1.84390000  | 1.07640700  | 1.03146200  |
| C | -0.41112000 | 2.18815200  | -0.29521200 |
| C | -1.29947100 | 1.12247000  | -0.03647800 |
| C | -1.11763400 | -0.25423500 | -0.05372100 |
| C | -0.00664100 | -1.14398200 | -0.18007000 |
| C | 1.35786000  | -1.08009700 | -0.02167500 |
| C | 2.24748500  | -0.07905600 | 0.42089800  |
| H | 1.11369200  | 1.16899000  | -1.38153800 |
| H | 1.44619100  | 2.94742900  | -1.02909900 |
| H | 0.87305100  | 1.13517100  | 1.50379900  |
| H | 2.58020500  | 1.81183700  | 1.34105500  |
| H | -0.74709100 | 3.17720900  | 0.01153700  |
| H | -2.32015000 | 1.40901100  | 0.21178800  |
| H | 3.29431700  | -0.23901800 | 0.17380300  |
| F | 2.00058300  | -2.23085600 | -0.37163600 |
| H | -0.30760100 | -2.16435300 | -0.42106300 |
| C | -2.40870500 | -1.02152500 | 0.06858600  |
| H | -2.31357300 | -2.11767000 | -0.07093200 |
| O | -3.48929000 | -0.53579900 | 0.30389700  |

### 3-F-5-CN-substituted

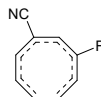

|   |             |             |             |
|---|-------------|-------------|-------------|
| C | 1.16532900  | 1.91591800  | -0.81980900 |
| C | 1.95532700  | 0.74914500  | 1.01370100  |
| C | -0.02896400 | 2.29535300  | -0.26038100 |
| C | -1.11919200 | 1.44070700  | 0.00797100  |
| C | -1.21901400 | 0.05100300  | -0.01282400 |
| C | -0.32287100 | -1.05746100 | -0.16059400 |
| C | 1.03151300  | -1.26271500 | -0.03023000 |
| C | 2.11020200  | -0.46274100 | 0.39596900  |
| H | 1.23264700  | 0.99616100  | -1.38565900 |
| H | 1.93666400  | 2.65685300  | -1.00924700 |
| H | 1.02921200  | 0.99014800  | 1.51760800  |
| H | 2.82951900  | 1.32142900  | 1.30825500  |
| H | -0.14552300 | 3.32793400  | 0.06328700  |
| H | -2.04505300 | 1.94546300  | 0.27356200  |
| H | 3.09865900  | -0.82400100 | 0.12302100  |
| F | 1.42295600  | -2.51023700 | -0.40728300 |
| H | -0.83664300 | -1.98734400 | -0.39540500 |
| C | -2.59142600 | -0.40649000 | 0.12354800  |
| N | -3.68450200 | -0.77297500 | 0.23229000  |

### 3-F-5-NO<sub>2</sub>-substituted

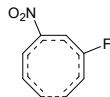

|   |             |             |             |
|---|-------------|-------------|-------------|
| C | 1.59635900  | 1.84751400  | -0.88982800 |
| C | 2.29197700  | 0.73556700  | 1.00867500  |
| C | 0.40976200  | 2.30604300  | -0.37381500 |
| C | -0.72543600 | 1.52151000  | -0.08014900 |
| C | -0.87500400 | 0.14795900  | -0.04865100 |
| C | -0.05586500 | -1.00615300 | -0.14574400 |
| C | 1.28313300  | -1.27032800 | 0.02810200  |
| C | 2.39210800  | -0.50984600 | 0.44780400  |
| H | 1.63511800  | 0.90271700  | -1.41560400 |
| H | 2.40200900  | 2.54623800  | -1.09681400 |
| H | 1.37184600  | 1.04852500  | 1.48281700  |
| H | 3.19082500  | 1.27078400  | 1.29894300  |
| H | 0.33775200  | 3.35651200  | -0.09918800 |
| H | -1.62725600 | 2.07005100  | 0.16863900  |
| H | 3.36549800  | -0.93527300 | 0.21578100  |
| F | 1.62192800  | -2.54734500 | -0.29620000 |
| H | -0.61816000 | -1.90555800 | -0.37750200 |
| N | -2.33703700 | -0.24799300 | 0.08714800  |
| O | -2.66969200 | -1.35390700 | -0.29446500 |
| O | -3.10504800 | 0.56321500  | 0.56950800  |

### 3-CHO-5-CH<sub>3</sub>-substituted

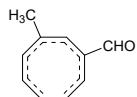

|   |             |             |             |
|---|-------------|-------------|-------------|
| C | 0.95387800  | -1.96163100 | -0.88792700 |
| C | -0.29493900 | -1.84096300 | 1.02592600  |
| C | 2.09161000  | -1.39057800 | -0.37165100 |
| C | 2.25141700  | -0.02849500 | -0.03877100 |
| C | 1.34795100  | 1.02666800  | 0.04793700  |
| C | -0.07765100 | 1.09658900  | -0.02798800 |
| C | -1.18817800 | 0.26635000  | 0.10205700  |
| C | -1.30651100 | -1.09229800 | 0.48451000  |
| H | 0.22204700  | -1.34574700 | -1.39402900 |
| H | 0.93339400  | -3.02234100 | -1.12155400 |
| H | 0.54499300  | -1.35459300 | 1.50371400  |
| H | -0.47220700 | -2.87798500 | 1.29793700  |
| H | 2.92782400  | -2.04210400 | -0.12244500 |
| H | 3.28003400  | 0.24974300  | 0.18532200  |
| H | -2.26190800 | -1.56005700 | 0.25483600  |
| C | -2.47747200 | 0.93143300  | -0.25259100 |
| H | -2.40050100 | 2.01336000  | -0.48834000 |
| O | -3.55079400 | 0.37484900  | -0.30383200 |
| H | -0.38853900 | 2.13108700  | -0.20124700 |
| C | 1.97276700  | 2.40903300  | 0.21319200  |
| H | 3.06070800  | 2.35637300  | 0.29250700  |
| H | 1.73290200  | 3.04136600  | -0.64981600 |
| H | 1.59037300  | 2.91545300  | 1.10560700  |

### 3-CHO-5-NH<sub>2</sub>-substituted

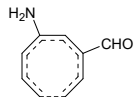

|   |             |             |             |
|---|-------------|-------------|-------------|
| C | 1.02747800  | -1.91601400 | -0.89928100 |
| C | -0.22069500 | -1.82333100 | 1.02808200  |
| C | 2.14320000  | -1.29995700 | -0.38476400 |
| C | 2.25618100  | 0.05350500  | -0.01284600 |
| C | 1.31427300  | 1.08099400  | 0.04858700  |
| C | -0.11359600 | 1.10614000  | -0.07161600 |
| C | -1.19148900 | 0.24531600  | 0.09816300  |
| C | -1.26819900 | -1.10719500 | 0.51026600  |
| H | 0.26523600  | -1.33251000 | -1.39885200 |
| H | 1.05272100  | -2.97611100 | -1.13358700 |
| H | 0.61483700  | -1.31082700 | 1.48638300  |
| H | -0.36279700 | -2.86311300 | 1.31026100  |
| H | 3.00170600  | -1.92284700 | -0.13754700 |
| H | 3.26508700  | 0.36175800  | 0.25958500  |
| H | -2.21437400 | -1.60298100 | 0.30471600  |
| C | -2.50171300 | 0.86173500  | -0.27652700 |
| H | -2.45278000 | 1.93005100  | -0.57276700 |
| O | -3.56183800 | 0.27952700  | -0.27871200 |
| H | -0.43479500 | 2.11928600  | -0.32406500 |
| N | 1.83809900  | 2.39094700  | 0.15670700  |
| H | 2.84396900  | 2.43790800  | 0.25824100  |
| H | 1.37656200  | 2.97939000  | 0.84000600  |

### 3-CHO-5-OH-substituted

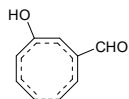

|   |             |             |             |
|---|-------------|-------------|-------------|
| C | -1.09959800 | -1.88448300 | 0.90217700  |
| C | 0.19903900  | -1.82754500 | -1.01260000 |
| C | -2.18728900 | -1.24455200 | 0.36371900  |
| C | -2.25977800 | 0.11972100  | 0.01331300  |
| C | -1.28144200 | 1.10289700  | -0.06048000 |
| C | 0.14309600  | 1.12182500  | 0.02012200  |
| C | 1.20141800  | 0.23241700  | -0.10274700 |
| C | 1.24772400  | -1.13529600 | -0.46997400 |
| H | -0.33076700 | -1.31916700 | 1.41244100  |
| H | -1.14973500 | -2.94493200 | 1.13027300  |
| H | -0.61332300 | -1.29724100 | -1.49253300 |
| H | 0.31600000  | -2.87502700 | -1.27641600 |
| H | -3.05659800 | -1.84327800 | 0.09679500  |
| H | -3.25875400 | 0.46920200  | -0.24977000 |
| H | 2.17461100  | -1.65237100 | -0.23134400 |
| C | 2.52360300  | 0.83719000  | 0.24911000  |
| H | 2.50105000  | 1.92349000  | 0.47246200  |
| O | 3.56458600  | 0.22431600  | 0.30638900  |
| H | 0.46752500  | 2.14982500  | 0.18836200  |
| O | -1.72676000 | 2.40064900  | -0.23406300 |
| H | -2.67325300 | 2.45673100  | -0.04471100 |

### 3-CHO-5-F-substituted

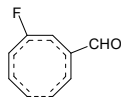

|   |             |             |             |
|---|-------------|-------------|-------------|
| C | -1.18520300 | -1.84768600 | 0.89427100  |
| C | 0.15844300  | -1.81855300 | -1.02010800 |
| C | -2.25118700 | -1.17956000 | 0.35100600  |
| C | -2.27531900 | 0.19591100  | 0.03266700  |
| C | -1.24391300 | 1.10625600  | -0.05830200 |
| C | 0.17342000  | 1.12688000  | -0.00305900 |
| C | 1.21172400  | 0.21246600  | -0.10009300 |
| C | 1.21374800  | -1.16227300 | -0.45096200 |
| H | -0.40404600 | -1.30270400 | 1.40826300  |
| H | -1.25641800 | -2.90931500 | 1.11120600  |
| H | -0.63437600 | -1.26427800 | -1.50612900 |
| H | 0.24377600  | -2.86997900 | -1.27945700 |
| H | -3.13863400 | -1.74736000 | 0.07848700  |
| H | -3.24666300 | 0.63351900  | -0.18572900 |
| H | 2.11843600  | -1.70903500 | -0.19374700 |
| C | 2.54776500  | 0.78600600  | 0.24586100  |
| H | 2.55613300  | 1.87712700  | 0.44573900  |
| O | 3.56859700  | 0.14257200  | 0.32174500  |
| H | 0.50921100  | 2.15528400  | 0.13928700  |
| F | -1.71034100 | 2.38660800  | -0.21550700 |

### 3-CHO-5-CHO-substituted

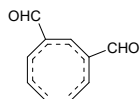

|   |             |             |             |
|---|-------------|-------------|-------------|
| C | -0.12810900 | 2.27253900  | -0.89505400 |
| C | 1.04776400  | 1.75842700  | 1.09786100  |
| C | -1.37771200 | 2.02809200  | -0.38590300 |
| C | -1.89569300 | 0.74832000  | -0.10327900 |
| C | -1.28374800 | -0.49881200 | -0.03907700 |
| C | 0.06223800  | -0.97696100 | -0.08097100 |
| C | 1.34701400  | -0.48391500 | 0.08855300  |
| C | 1.81125400  | 0.79591000  | 0.50461700  |
| H | 0.42496200  | 1.48201700  | -1.38526100 |
| H | 0.19607200  | 3.28913000  | -1.09894700 |
| H | 0.08756500  | 1.51635400  | 1.53405900  |
| H | 1.49505100  | 2.70117600  | 1.40060700  |
| H | -2.01289100 | 2.87530000  | -0.13491200 |
| H | -2.96610500 | 0.70364400  | 0.09444000  |
| H | 2.85776300  | 1.00039600  | 0.28579200  |
| C | 2.42257800  | -1.46342800 | -0.24686900 |
| H | 2.06926900  | -2.48457000 | -0.49928400 |
| O | 3.60412900  | -1.20545800 | -0.26609300 |
| H | 0.07654900  | -2.05368000 | -0.27488600 |
| C | -2.26932000 | -1.63039800 | 0.07776500  |
| H | -1.82866800 | -2.64441400 | -0.01286700 |
| O | -3.45627500 | -1.50504200 | 0.26426800  |

### 3-CHO-5-CN-substituted



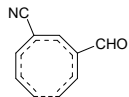

|   |             |             |             |
|---|-------------|-------------|-------------|
| C | -0.14623900 | 2.29783200  | -0.87771300 |
| C | 1.01081300  | 1.75222300  | 1.08587500  |
| C | -1.40203900 | 2.10648600  | -0.36043500 |
| C | -1.97412900 | 0.85106100  | -0.07240800 |
| C | -1.40181600 | -0.41874300 | -0.00747300 |
| C | -0.07397200 | -0.96052900 | -0.06072100 |
| C | 1.22514300  | -0.50360900 | 0.09053000  |
| C | 1.73780600  | 0.75940900  | 0.49369000  |
| H | 0.36309600  | 1.48857200  | -1.38435400 |
| H | 0.21733700  | 3.30078000  | -1.08169100 |
| H | 0.05416900  | 1.54059900  | 1.54548400  |
| H | 1.49280000  | 2.68148500  | 1.37671500  |
| H | -1.99744300 | 2.97786300  | -0.09657700 |
| H | -3.04214400 | 0.86590900  | 0.13411400  |
| H | 2.78751500  | 0.92778500  | 0.26053200  |
| C | 2.26384400  | -1.52249600 | -0.25804600 |
| H | 1.87460000  | -2.53314100 | -0.49569700 |
| O | 3.45061600  | -1.29752600 | -0.29872100 |
| H | -0.11030200 | -2.03465700 | -0.24888300 |
| C | -2.39664900 | -1.47028900 | 0.11373100  |
| N | -3.18587600 | -2.31186500 | 0.21399300  |

### 3-CHO-5-NO<sub>2</sub>-substituted

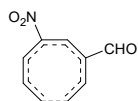

|   |             |             |             |
|---|-------------|-------------|-------------|
| C | 0.55220400  | 2.38506500  | -0.93953200 |
| C | 1.56169300  | 1.71040700  | 1.06767200  |
| C | -0.72786900 | 2.41408000  | -0.44756800 |
| C | -1.50576100 | 1.28021000  | -0.13765600 |
| C | -1.13596900 | -0.04884800 | -0.03806000 |
| C | 0.06249700  | -0.81122200 | -0.06142100 |
| C | 1.41535000  | -0.57010300 | 0.11697500  |
| C | 2.12418900  | 0.59779300  | 0.51012800  |
| H | 0.93408800  | 1.49044300  | -1.41389100 |
| H | 1.07630000  | 3.31050400  | -1.15992800 |
| H | 0.57298500  | 1.66912500  | 1.50559300  |
| H | 2.18413800  | 2.55331000  | 1.35423400  |
| H | -1.17866800 | 3.37765800  | -0.22060500 |
| H | -2.55630100 | 1.46455500  | 0.06192400  |
| H | 3.19177800  | 0.58259600  | 0.29877800  |
| C | 2.27629700  | -1.75428600 | -0.19275100 |
| H | 1.72864900  | -2.69007200 | -0.42343800 |
| O | 3.48455700  | -1.72935600 | -0.21023100 |
| H | -0.15802600 | -1.85999900 | -0.24925100 |
| N | -2.35098500 | -0.95072500 | 0.08380800  |
| O | -2.24898000 | -2.10552600 | -0.28666500 |
| O | -3.36980600 | -0.47282100 | 0.54604700  |

### 3-CN-5-CH<sub>3</sub>-substituted

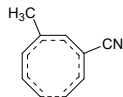

|   |             |             |             |
|---|-------------|-------------|-------------|
| C | 1.23670900  | -1.80815200 | -0.93086700 |
| C | 0.00256400  | -1.93077100 | 1.02227800  |
| C | 2.24380200  | -1.03623000 | -0.41022400 |
| C | 2.13913200  | 0.32649900  | -0.05098800 |
| C | 1.05148900  | 1.18529700  | 0.06070300  |
| C | -0.36483200 | 0.99576600  | -0.01817800 |
| C | -1.28954000 | -0.03913200 | 0.11294900  |
| C | -1.14380400 | -1.40038300 | 0.49653300  |
| H | 0.38569400  | -1.34002600 | -1.40792100 |
| H | 1.42021400  | -2.84879500 | -1.18269400 |
| H | 0.73812600  | -1.28419600 | 1.48154500  |
| H | 0.03964100  | -2.98172300 | 1.29315900  |
| H | 3.19520400  | -1.51534300 | -0.18409200 |
| H | 3.09637300  | 0.79527000  | 0.17058000  |
| H | -1.98232700 | -2.05655000 | 0.27454200  |
| C | -2.65212500 | 0.34160200  | -0.20051900 |
| N | -3.74581500 | 0.62887900  | -0.45206300 |
| H | -0.86796100 | 1.94929900  | -0.18177400 |
| C | 1.40055200  | 2.65802200  | 0.25361100  |
| H | 2.47709700  | 2.80871800  | 0.35714900  |
| H | 1.06387200  | 3.24478000  | -0.60911400 |
| H | 0.91109100  | 3.07130200  | 1.14127500  |

#### 3-CN-5-NH<sub>2</sub>-substituted

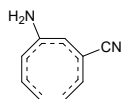

|   |             |             |             |
|---|-------------|-------------|-------------|
| C | 1.27945500  | -1.76255100 | -0.94659300 |
| C | 0.06137100  | -1.89769400 | 1.03290800  |
| C | 2.26653200  | -0.95962200 | -0.43231300 |
| C | 2.13364200  | 0.38508100  | -0.03060400 |
| C | 1.02229400  | 1.22237300  | 0.06037900  |
| C | -0.39154500 | 1.00085700  | -0.05958500 |
| C | -1.28595800 | -0.04871900 | 0.11928100  |
| C | -1.11095700 | -1.39716300 | 0.53538100  |
| H | 0.40471200  | -1.32505200 | -1.40988500 |
| H | 1.49711800  | -2.79537500 | -1.20177200 |
| H | 0.79765300  | -1.23037800 | 1.46053700  |
| H | 0.12461600  | -2.94324200 | 1.31958200  |
| H | 3.23172800  | -1.41519600 | -0.21535100 |
| H | 3.07217100  | 0.86864700  | 0.23778700  |
| H | -1.94275200 | -2.07099700 | 0.34551300  |
| C | -2.65672700 | 0.29248700  | -0.20655100 |
| N | -3.75689700 | 0.55016800  | -0.46099900 |
| H | -0.89481300 | 1.93567000  | -0.30212400 |
| N | 1.29973400  | 2.59846300  | 0.19786300  |
| H | 2.27808900  | 2.83138900  | 0.30728900  |
| H | 0.72296900  | 3.09382000  | 0.86657400  |

#### 3-CN-5-OH-substituted

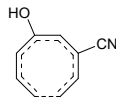

|   |             |             |             |
|---|-------------|-------------|-------------|
| C | 1.33640300  | -1.72595900 | -0.94893400 |
| C | 0.07013300  | -1.89937200 | 1.01178900  |
| C | 2.29663000  | -0.91322900 | -0.40615000 |
| C | 2.12941100  | 0.43612900  | -0.02630700 |
| C | 0.99573800  | 1.23056500  | 0.07494700  |
| C | -0.41464800 | 1.01328500  | -0.00955100 |
| C | -1.29287800 | -0.05535100 | 0.11496100  |
| C | -1.09429400 | -1.41477100 | 0.48504100  |
| H | 0.46440300  | -1.29886500 | -1.42713000 |
| H | 1.57085900  | -2.75623700 | -1.19902900 |
| H | 0.78193200  | -1.22458100 | 1.46905400  |
| H | 0.15175500  | -2.94929300 | 1.27631500  |
| H | 3.26413800  | -1.35046200 | -0.16457800 |
| H | 3.05346200  | 0.95181400  | 0.23629600  |
| H | -1.90585200 | -2.10118200 | 0.25629700  |
| C | -2.66803100 | 0.27590800  | -0.20073900 |
| N | -3.77154600 | 0.51989600  | -0.45339000 |
| H | -0.91463000 | 1.96608800  | -0.16910000 |
| O | 1.20698700  | 2.57920500  | 0.27921100  |
| H | 2.12807100  | 2.80657500  | 0.09157300  |

### 3-CN-5-F-substituted

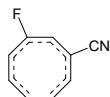

|   |             |             |             |
|---|-------------|-------------|-------------|
| C | 1.42160900  | -1.67826300 | -0.93953000 |
| C | 0.11116700  | -1.88315000 | 1.01491500  |
| C | 2.35239800  | -0.83940200 | -0.38928700 |
| C | 2.13204000  | 0.51286500  | -0.04255300 |
| C | 0.95861400  | 1.22544300  | 0.07206000  |
| C | -0.44453800 | 1.01060600  | 0.01058500  |
| C | -1.29881400 | -0.07937300 | 0.10599800  |
| C | -1.05353300 | -1.43740900 | 0.45925100  |
| H | 0.54284600  | -1.27625300 | -1.42755400 |
| H | 1.67961300  | -2.70614600 | -1.17625100 |
| H | 0.79608600  | -1.18695700 | 1.48152400  |
| H | 0.22584900  | -2.93095300 | 1.27477400  |
| H | 3.33157400  | -1.24112800 | -0.13579300 |
| H | 3.01122400  | 1.11120300  | 0.18354000  |
| H | -1.83615600 | -2.15024600 | 0.21063300  |
| C | -2.68103900 | 0.21903700  | -0.20480900 |
| N | -3.79034500 | 0.43872700  | -0.45399200 |
| H | -0.95527900 | 1.96200200  | -0.12289500 |
| F | 1.19435900  | 2.56058400  | 0.26335500  |

### 3-CN-5-CHO-substituted

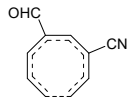

|   |             |             |             |
|---|-------------|-------------|-------------|
| C | -0.20538300 | 2.29445300  | -0.92970700 |
| C | 0.97280000  | 1.86824800  | 1.10099300  |
| C | -1.43415400 | 1.95351300  | -0.42950900 |
| C | -1.84786600 | 0.63874700  | -0.12840900 |
| C | -1.13966400 | -0.55293700 | -0.03558100 |
| C | 0.23635900  | -0.93866900 | -0.07110100 |
| C | 1.47578900  | -0.33714000 | 0.10560200  |
| C | 1.83341600  | 0.97877500  | 0.52956200  |
| H | 0.42476700  | 1.54578600  | -1.39204100 |
| H | 0.03381400  | 3.33158100  | -1.14699100 |
| H | 0.02821900  | 1.53576600  | 1.50989000  |
| H | 1.32513400  | 2.84710700  | 1.41138700  |
| H | -2.14368500 | 2.74746300  | -0.20457300 |
| H | -2.91299100 | 0.51011300  | 0.06009800  |
| H | 2.85819600  | 1.28425300  | 0.32930100  |
| C | 2.60601500  | -1.19367000 | -0.18644800 |
| N | 3.52037300  | -1.86411800 | -0.42289000 |
| H | 0.33728300  | -2.00921900 | -0.25417500 |
| C | -2.03714500 | -1.75770500 | 0.09975700  |
| H | -1.52184300 | -2.73637700 | 0.02296100  |
| O | -3.22906300 | -1.71616700 | 0.28667800  |

### 3-CN-5-CN-substituted

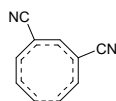

|   |             |             |             |
|---|-------------|-------------|-------------|
| C | -0.28540600 | 2.30694000  | -0.91285900 |
| C | 0.88940600  | 1.88059200  | 1.08832400  |
| C | -1.51568100 | 1.98774800  | -0.40136300 |
| C | -1.95150000 | 0.68149200  | -0.09508200 |
| C | -1.24978800 | -0.51903300 | -0.00454700 |
| C | 0.12404400  | -0.93382600 | -0.05384600 |
| C | 1.36608700  | -0.33432600 | 0.10449500  |
| C | 1.73900300  | 0.97977400  | 0.51527500  |
| H | 0.31919400  | 1.54952000  | -1.39477200 |
| H | -0.03164400 | 3.34034400  | -1.13031500 |
| H | -0.04567000 | 1.55423000  | 1.52392900  |
| H | 1.25249600  | 2.85932600  | 1.38661800  |
| H | -2.20690000 | 2.79265300  | -0.16055400 |
| H | -3.01652100 | 0.58540600  | 0.10407300  |
| H | 2.76269200  | 1.27686100  | 0.29872900  |
| C | 2.48834000  | -1.19706600 | -0.20355400 |
| N | 3.40096700  | -1.86506400 | -0.45134800 |
| H | 0.20246700  | -2.00410500 | -0.23362700 |
| C | -2.13363500 | -1.66396400 | 0.13443800  |
| N | -2.83830100 | -2.57553700 | 0.24823900  |

### 3-CN-5-NO<sub>2</sub>-substituted

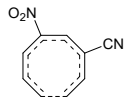

|   |             |             |             |
|---|-------------|-------------|-------------|
| C | 0.62152500  | 2.40516500  | -0.96832500 |
| C | 1.60290900  | 1.74695700  | 1.07284500  |
| C | -0.66117100 | 2.41755600  | -0.48660300 |
| C | -1.42127700 | 1.27360500  | -0.16401100 |
| C | -1.03208000 | -0.04670800 | -0.04101200 |
| C | 0.16902600  | -0.80587100 | -0.05688900 |
| C | 1.51772100  | -0.53802800 | 0.13320300  |
| C | 2.20428200  | 0.64515000  | 0.53693100  |
| H | 1.02741500  | 1.50919700  | -1.42008200 |
| H | 1.13091800  | 3.33673300  | -1.19724500 |
| H | 0.60667400  | 1.68295800  | 1.48974500  |
| H | 2.20011700  | 2.60545300  | 1.36440200  |
| H | -1.13270600 | 3.37574800  | -0.28006700 |
| H | -2.47585300 | 1.44297600  | 0.02757800  |
| H | 3.27469800  | 0.66572700  | 0.34482500  |
| C | 2.39086700  | -1.66256400 | -0.13317300 |
| N | 3.11191300  | -2.54295100 | -0.34625400 |
| H | -0.03626200 | -1.85651500 | -0.23882600 |
| N | -2.23834400 | -0.96212300 | 0.09429900  |
| O | -3.25240400 | -0.49306200 | 0.57508000  |
| O | -2.13019600 | -2.11173000 | -0.28563500 |

### 3-NO<sub>2</sub>-5-CH<sub>3</sub>-substituted

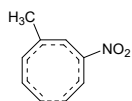

|   |             |             |             |
|---|-------------|-------------|-------------|
| C | 1.59738400  | -1.80693500 | -0.92068100 |
| C | 0.40415400  | -1.94654600 | 1.05589400  |
| C | 2.59019000  | -1.00170400 | -0.42378000 |
| C | 2.44905800  | 0.36001300  | -0.07406200 |
| C | 1.33634200  | 1.18228400  | 0.05722700  |
| C | -0.07419400 | 0.94414100  | 0.01213300  |
| C | -0.94320400 | -0.11881300 | 0.16504000  |
| C | -0.76924500 | -1.47003700 | 0.53846200  |
| H | 0.72637600  | -1.36846400 | -1.38991500 |
| H | 1.80501000  | -2.84503900 | -1.16398800 |
| H | 1.12164300  | -1.26974900 | 1.50006400  |
| H | 0.48651500  | -2.99396300 | 1.32994900  |
| H | 3.55940400  | -1.44998900 | -0.21090800 |
| H | 3.39465800  | 0.86222200  | 0.12279900  |
| H | -1.58370500 | -2.15098600 | 0.31953000  |
| N | -2.37364300 | 0.23188300  | -0.14082300 |
| O | -3.14952100 | -0.69142600 | -0.31761300 |
| O | -2.69436900 | 1.40520100  | -0.20047600 |
| H | -0.62520700 | 1.87079100  | -0.13257900 |
| C | 1.63689300  | 2.66649900  | 0.24102300  |
| H | 2.71055100  | 2.86210000  | 0.27635100  |
| H | 1.21848300  | 3.24455300  | -0.59095200 |
| H | 1.18861700  | 3.05174400  | 1.16259300  |

### 3-NO<sub>2</sub>-5-NH<sub>2</sub>-substituted

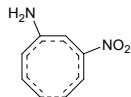

|   |             |             |             |
|---|-------------|-------------|-------------|
| C | -1.63798200 | -1.73876300 | 1.00970200  |
| C | -0.42883800 | -1.94475300 | -1.02666700 |
| C | -2.60442100 | -0.93097100 | 0.47097400  |
| C | -2.44509900 | 0.39797800  | 0.02565500  |
| C | -1.31972700 | 1.20781600  | -0.11077300 |
| C | 0.08978300  | 0.95632400  | -0.00385400 |
| C | 0.93976500  | -0.11688300 | -0.16198800 |
| C | 0.75244800  | -1.46884600 | -0.53459500 |
| H | -0.73899200 | -1.31573700 | 1.43857600  |
| H | -1.87449900 | -2.76074100 | 1.29015500  |
| H | -1.16417500 | -1.27309700 | -1.44894400 |
| H | -0.52124300 | -2.99624200 | -1.28102000 |
| H | -3.58253600 | -1.36924300 | 0.27785700  |
| H | -3.36957700 | 0.89885700  | -0.25832300 |
| H | 1.56682600  | -2.15201200 | -0.32517000 |
| N | 2.37554000  | 0.21763000  | 0.15201400  |
| H | 0.64536300  | 1.86934200  | 0.19063900  |
| N | -1.61090300 | 2.55208300  | -0.41375600 |
| H | -2.39479300 | 2.95657100  | 0.08162800  |
| H | -0.82058100 | 3.18109900  | -0.45269600 |
| O | 3.19159000  | -0.68236400 | 0.06367400  |
| O | 2.66168200  | 1.35759000  | 0.47492100  |

3-NO<sub>2</sub>-5-OH-substituted

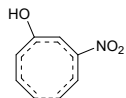

|   |             |             |             |
|---|-------------|-------------|-------------|
| C | -1.67922600 | -1.70301100 | 0.98982400  |
| C | -0.44059200 | -1.94616100 | -0.98287100 |
| C | -2.63287400 | -0.88979800 | 0.43712800  |
| C | -2.44590400 | 0.44664600  | 0.02251500  |
| C | -1.29768600 | 1.21280800  | -0.11675500 |
| C | 0.10755900  | 0.96581300  | -0.03959400 |
| C | 0.94614700  | -0.12028900 | -0.15170500 |
| C | 0.74081200  | -1.48050300 | -0.47819100 |
| H | -0.79679300 | -1.27743200 | 1.44987700  |
| H | -1.92396800 | -2.72466900 | 1.26401500  |
| H | -1.14195300 | -1.27013000 | -1.45439700 |
| H | -0.55224300 | -3.00206500 | -1.20932500 |
| H | -3.60992400 | -1.31681200 | 0.21720400  |
| H | -3.36344900 | 0.97448500  | -0.23850300 |
| H | 1.53814000  | -2.17200100 | -0.23195600 |
| N | 2.38502700  | 0.21036000  | 0.14518100  |
| O | 3.19764300  | -0.69053500 | 0.02981100  |
| O | 2.67169200  | 1.34364300  | 0.48327600  |
| H | 0.64242300  | 1.90245900  | 0.08851500  |
| O | -1.47953800 | 2.55787800  | -0.36305100 |
| H | -2.39521800 | 2.81272400  | -0.18410300 |

3-NO<sub>2</sub>-5-F-substituted

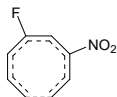

|   |             |             |             |
|---|-------------|-------------|-------------|
| C | -1.75157200 | -1.66441300 | 0.97399000  |
| C | -0.46650900 | -1.92449300 | -0.99860100 |
| C | -2.68022400 | -0.82980400 | 0.41508200  |
| C | -2.44946000 | 0.51319600  | 0.03967400  |
| C | -1.26898600 | 1.20746400  | -0.10566900 |
| C | 0.13029400  | 0.97209300  | -0.05821300 |
| C | 0.95075700  | -0.12956200 | -0.14611600 |
| C | 0.70955200  | -1.48872500 | -0.46056000 |
| H | -0.86404900 | -1.26038700 | 1.44416400  |
| H | -2.01352500 | -2.68633300 | 1.23108200  |
| H | -1.14748300 | -1.23197100 | -1.47650600 |
| H | -0.60228200 | -2.97761700 | -1.22401900 |
| H | -3.66569400 | -1.22721100 | 0.18031500  |
| H | -3.32454600 | 1.11834100  | -0.18446600 |
| H | 1.48374100  | -2.19946400 | -0.19447300 |
| N | 2.39214700  | 0.17600900  | 0.14674000  |
| O | 3.17830000  | -0.75341700 | 0.09569600  |
| O | 2.70573700  | 1.31968600  | 0.41960800  |
| H | 0.67172200  | 1.90852400  | 0.04642600  |
| F | -1.48870300 | 2.53993100  | -0.32551800 |

### 3-NO<sub>2</sub>-5-CHO-substituted

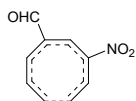

|   |             |             |             |
|---|-------------|-------------|-------------|
| C | 0.78001000  | 2.34059900  | 0.94768100  |
| C | -0.42881600 | 2.08563500  | -1.09848900 |
| C | 1.96237900  | 1.86583900  | 0.44593000  |
| C | 2.21839900  | 0.51418600  | 0.13198200  |
| C | 1.37138800  | -0.58072500 | 0.01915000  |
| C | -0.04140600 | -0.79481600 | 0.03433700  |
| C | -1.17947500 | -0.04163100 | -0.14467300 |
| C | -1.39538800 | 1.30520600  | -0.53812000 |
| H | 0.06611600  | 1.66408100  | 1.39949000  |
| H | 0.65823800  | 3.39619800  | 1.17332000  |
| H | 0.47011100  | 1.65104000  | -1.51458400 |
| H | -0.65666400 | 3.10817000  | -1.38347600 |
| H | 2.76044300  | 2.57384600  | 0.23155500  |
| H | 3.26182300  | 0.25970200  | -0.05037800 |
| H | -2.37211300 | 1.72499700  | -0.32444600 |
| N | -2.45114900 | -0.79265700 | 0.13066600  |
| O | -3.48509000 | -0.14824500 | 0.14748100  |
| O | -2.39645000 | -1.99330700 | 0.32526300  |
| H | -0.28922500 | -1.84295700 | 0.19335600  |
| C | 2.11368600  | -1.88621100 | -0.12324100 |
| H | 1.48016000  | -2.79337800 | -0.06095900 |
| O | 3.30335000  | -1.98864600 | -0.30098000 |

### 3-NO<sub>2</sub>-5-CN-substituted

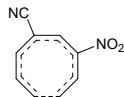

|   |             |             |             |
|---|-------------|-------------|-------------|
| C | -0.95413300 | -2.31056600 | 0.92940500  |
| C | 0.25218800  | -2.10318000 | -1.09434300 |
| C | -2.12082100 | -1.80176700 | 0.42372500  |
| C | -2.34020200 | -0.44459000 | 0.10607600  |
| C | -1.45135400 | 0.62163500  | -0.00794200 |
| C | -0.02754900 | 0.80025600  | 0.01937000  |
| C | 1.07751100  | -0.00160100 | -0.14900000 |
| C | 1.24665400  | -1.35481100 | -0.53586100 |
| H | -0.22934700 | -1.65660900 | 1.39695800  |
| H | -0.86612700 | -3.36970500 | 1.15317300  |
| H | -0.62141700 | -1.63569400 | -1.52874600 |
| H | 0.44438000  | -3.13466100 | -1.37336200 |
| H | -2.93605300 | -2.48558100 | 0.19738600  |
| H | -3.37730800 | -0.17646200 | -0.08308400 |
| H | 2.20580200  | -1.80914400 | -0.31377800 |
| N | 2.37594300  | 0.70146300  | 0.14479900  |
| O | 3.38283000  | 0.01643400  | 0.16950200  |
| O | 2.36162900  | 1.90091400  | 0.34254100  |
| H | 0.24741100  | 1.83935200  | 0.17981300  |
| C | -2.13303300 | 1.89627400  | -0.15591600 |
| N | -2.67859600 | 2.90993900  | -0.27876900 |

### 3-NO<sub>2</sub>-5-NO<sub>2</sub>-substituted

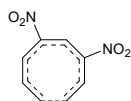

|   |             |             |             |
|---|-------------|-------------|-------------|
| C | 0.14243100  | 2.60309400  | 0.97903300  |
| C | -0.96287400 | 2.16480900  | -1.07035900 |
| C | 1.39790700  | 2.36554700  | 0.48711600  |
| C | 1.91854800  | 1.09487200  | 0.16135400  |
| C | 1.27614800  | -0.12031100 | 0.02875900  |
| C | -0.05198800 | -0.62194600 | 0.03025400  |
| C | -1.30279000 | -0.08369400 | -0.15843200 |
| C | -1.76651700 | 1.20288700  | -0.53257500 |
| H | -0.43026400 | 1.80422200  | 1.43246900  |
| H | -0.17516800 | 3.61619700  | 1.20801900  |
| H | -0.00112600 | 1.91662800  | -1.49957400 |
| H | -1.38162400 | 3.12991100  | -1.33896400 |
| H | 2.04589700  | 3.21334600  | 0.27638900  |
| H | 2.98701100  | 1.05224500  | -0.02363700 |
| H | -2.80577900 | 1.42598100  | -0.31817500 |
| N | -2.41490500 | -1.06607700 | 0.09899000  |
| O | -3.55167100 | -0.62736100 | 0.09950000  |
| O | -2.13259000 | -2.23179000 | 0.29291500  |
| H | -0.07872400 | -1.69580200 | 0.19029400  |
| N | 2.27454300  | -1.26006100 | -0.10853500 |
| O | 1.91917200  | -2.37323600 | 0.22326700  |
| O | 3.37972800  | -0.99402500 | -0.54204600 |

### 5.2.16 3,6-substituted



3-CH<sub>3</sub>-6-CH<sub>3</sub>-substituted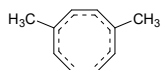

|   |             |             |             |
|---|-------------|-------------|-------------|
| C | 0.65065400  | 1.62853500  | 0.92727000  |
| C | -0.65054200 | 1.62846800  | -0.92730800 |
| C | 1.74104100  | 0.98485700  | 0.39703400  |
| C | 1.78036900  | -0.38493200 | 0.03835100  |
| C | 0.71362900  | -1.27559600 | -0.04225700 |
| C | -0.71371600 | -1.27557500 | 0.04222500  |
| C | -1.78042600 | -0.38486800 | -0.03833300 |
| C | -1.74098900 | 0.98491300  | -0.39703900 |
| H | -0.11847200 | 1.05366000  | 1.42658100  |
| H | 0.71376600  | 2.68067900  | 1.19115000  |
| H | 0.11852500  | 1.05349700  | -1.42660100 |
| H | -0.71355300 | 2.68060800  | -1.19122200 |
| H | 2.62707600  | 1.57469500  | 0.15939600  |
| H | 1.06230300  | -2.29992900 | -0.17914800 |
| H | -2.62694300 | 1.57485600  | -0.15939100 |
| C | -3.16296000 | -0.92559700 | 0.28090900  |
| H | -3.13016100 | -1.97264200 | 0.59153900  |
| H | -3.62251800 | -0.35149800 | 1.09439200  |
| H | -3.82995500 | -0.84843300 | -0.58507500 |
| H | -1.06241800 | -2.29990500 | 0.17908900  |
| C | 3.16291300  | -0.92566200 | -0.28085500 |
| H | 3.83014100  | -0.84766100 | 0.58487700  |
| H | 3.13022000  | -1.97298300 | -0.59058900 |
| H | 3.62214100  | -0.35220200 | -1.09497900 |

3-CH<sub>3</sub>-6-NH<sub>2</sub>-substituted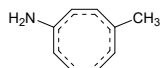

|   |             |             |             |
|---|-------------|-------------|-------------|
| C | 0.68428100  | 1.60387700  | 0.91372300  |
| C | -0.63361400 | 1.65828300  | -0.90464400 |
| C | 1.77413800  | 0.96879100  | 0.37197400  |
| C | 1.79472700  | -0.40273000 | 0.02407100  |
| C | 0.71971600  | -1.29433900 | -0.03431200 |
| C | -0.70191200 | -1.27337900 | 0.02579600  |
| C | -1.76428100 | -0.37187600 | -0.03832600 |
| C | -1.71904900 | 1.00122000  | -0.37516900 |
| H | -0.07124100 | 1.02467200  | 1.42954000  |
| H | 0.74608900  | 2.65590200  | 1.17659500  |
| H | 0.12697200  | 1.09759600  | -1.43193200 |
| H | -0.70785500 | 2.71372800  | -1.15256900 |
| H | 2.64707800  | 1.55327800  | 0.08439800  |
| H | 1.06866700  | -2.32383500 | -0.13244600 |
| H | -2.60250900 | 1.58894500  | -0.12117200 |
| C | -3.14851400 | -0.90981300 | 0.28281400  |
| H | -3.60189700 | -0.34612200 | 1.10725100  |
| H | -3.82196200 | -0.82048500 | -0.57717700 |
| H | -3.11888800 | -1.96113600 | 0.57989400  |
| H | -1.06190100 | -2.29465400 | 0.15559800  |
| N | 3.06403900  | -0.89545400 | -0.35144000 |
| H | 3.82082500  | -0.60476600 | 0.25630400  |
| H | 3.09540900  | -1.89514700 | -0.50976900 |

3-CH<sub>3</sub>-6-OH-substituted

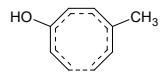

|   |             |             |             |
|---|-------------|-------------|-------------|
| C | 0.74705200  | 1.59745100  | 0.91990100  |
| C | -0.60536400 | 1.65577300  | -0.91995900 |
| C | 1.81177000  | 0.92627000  | 0.37621000  |
| C | 1.77408000  | -0.44018000 | 0.01555800  |
| C | 0.70015100  | -1.31473800 | -0.07634300 |
| C | -0.72072300 | -1.27716500 | 0.01036000  |
| C | -1.76086400 | -0.35353200 | -0.03221800 |
| C | -1.69086400 | 1.02136900  | -0.37173800 |
| H | -0.03235200 | 1.04486300  | 1.42796800  |
| H | 0.84034000  | 2.64894600  | 1.17416900  |
| H | 0.15380800  | 1.07891600  | -1.43212200 |
| H | -0.66292900 | 2.71063200  | -1.17396800 |
| H | 2.70620900  | 1.48371700  | 0.09624400  |
| H | 1.06465800  | -2.33117300 | -0.21871200 |
| H | -2.56221900 | 1.62466400  | -0.11279800 |
| C | -3.15226300 | -0.85798200 | 0.30902000  |
| H | -3.55793600 | -0.31684800 | 1.17263400  |
| H | -3.84820500 | -0.70556000 | -0.52334300 |
| H | -3.14984900 | -1.92191600 | 0.55806800  |
| H | -1.09511000 | -2.29369600 | 0.13360400  |
| O | 2.97728300  | -1.03227300 | -0.31572600 |
| H | 3.70747200  | -0.50795100 | 0.03931600  |

3-CH<sub>3</sub>-6-F-substituted

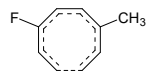

|   |             |             |             |
|---|-------------|-------------|-------------|
| C | 0.79304400  | 1.61858800  | 0.90761700  |
| C | -0.55998200 | 1.64333100  | -0.92832400 |
| C | 1.84422100  | 0.90975100  | 0.38234400  |
| C | 1.74425000  | -0.44608600 | 0.02785600  |
| C | 0.68770100  | -1.32657800 | -0.08406400 |
| C | -0.73275900 | -1.28468200 | 0.01324800  |
| C | -1.75308500 | -0.34096200 | -0.03013200 |
| C | -1.65622400 | 1.03128000  | -0.37502200 |
| H | -0.00137100 | 1.09644700  | 1.42335800  |
| H | 0.91683400  | 2.66995200  | 1.14893900  |
| H | 0.18752600  | 1.05069000  | -1.43968400 |
| H | -0.60140100 | 2.69655700  | -1.19135700 |
| H | 2.77664500  | 1.40456300  | 0.12171600  |
| H | 1.05770500  | -2.33840400 | -0.24445700 |
| H | -2.51543700 | 1.65174200  | -0.11720300 |
| C | -3.15259500 | -0.81613600 | 0.31791800  |
| H | -3.53379700 | -0.27768400 | 1.19399700  |
| H | -3.85180900 | -0.63224100 | -0.50484900 |
| H | -3.17409700 | -1.88334600 | 0.55077800  |
| H | -1.11807200 | -2.29660000 | 0.13656200  |
| F | 2.95220500  | -1.00807900 | -0.27405000 |

3-CH<sub>3</sub>-6-CHO-substituted

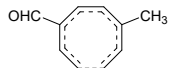

|   |             |             |             |
|---|-------------|-------------|-------------|
| C | -0.07007600 | 1.94264300  | -0.90311600 |
| C | 1.16301200  | 1.52629000  | 1.03967900  |
| C | -1.24510000 | 1.44520300  | -0.41141900 |
| C | -1.50215300 | 0.07732400  | -0.13029000 |
| C | -0.64099800 | -1.01407900 | -0.06581700 |
| C | 0.75408100  | -1.28484100 | -0.11581900 |
| C | 1.95259400  | -0.59082700 | 0.03056100  |
| C | 2.13320300  | 0.74499600  | 0.47114800  |
| H | 0.62996800  | 1.28626100  | -1.40230200 |
| H | 0.04000900  | 3.00676500  | -1.09148500 |
| H | 0.27712600  | 1.06918400  | 1.46179700  |
| H | 1.39459500  | 2.53485100  | 1.36973200  |
| H | -2.03754700 | 2.14832900  | -0.15127800 |
| H | -1.21270300 | -1.93936100 | 0.01805200  |
| H | 3.11339900  | 1.18703300  | 0.29099300  |
| C | 3.23190300  | -1.33596700 | -0.29713800 |
| H | 3.77382700  | -0.82475700 | -1.10164100 |
| H | 3.89999800  | -1.37326700 | 0.57009700  |
| H | 3.03607300  | -2.35954300 | -0.62392900 |
| H | 0.91906000  | -2.34841900 | -0.28776200 |
| C | -2.93930100 | -0.23412300 | 0.12212500  |
| H | -3.60475400 | 0.65431900  | 0.13995500  |
| O | -3.40650400 | -1.33763900 | 0.29603500  |

3-CH<sub>3</sub>-6-CN-substituted

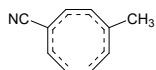

|   |             |             |             |
|---|-------------|-------------|-------------|
| C | 0.25098800  | 1.79808800  | 0.93293300  |
| C | -0.99058800 | 1.55969800  | -0.99946800 |
| C | 1.39632900  | 1.23895000  | 0.43593200  |
| C | 1.53711200  | -0.14262500 | 0.13180100  |
| C | 0.58811000  | -1.16145400 | 0.04344500  |
| C | -0.82825800 | -1.30238800 | 0.08396400  |
| C | -1.96307200 | -0.50756100 | -0.05055800 |
| C | -2.02800200 | 0.84984100  | -0.45384200 |
| H | -0.48426500 | 1.17722700  | 1.42706000  |
| H | 0.21343000  | 2.86201800  | 1.14673900  |
| H | -0.15480800 | 1.03735800  | -1.44743200 |
| H | -1.13361000 | 2.59281800  | -1.30285100 |
| H | 2.23893800  | 1.87934700  | 0.18442000  |
| H | 1.06085600  | -2.13769400 | -0.05443300 |
| H | -2.96585900 | 1.37007200  | -0.25843200 |
| C | -3.30167100 | -1.15295900 | 0.25159900  |
| H | -3.81635700 | -0.60666400 | 1.05069800  |
| H | -3.95562900 | -1.13366400 | -0.62687500 |
| H | -3.19218200 | -2.19061000 | 0.57408500  |
| H | -1.08286800 | -2.35105400 | 0.23473800  |
| C | 2.89668200  | -0.56382200 | -0.13034300 |
| N | 3.98950900  | -0.88482500 | -0.34292700 |

3-CH<sub>3</sub>-6-NO<sub>2</sub>-substituted

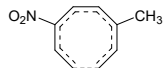

|   |             |             |             |
|---|-------------|-------------|-------------|
| C | 0.16593700  | 1.87502600  | -0.90674500 |
| C | 1.38430800  | 1.55894200  | 1.02542000  |
| C | -1.00308100 | 1.35486000  | -0.42351000 |
| C | -1.17089400 | -0.02362700 | -0.15987100 |
| C | -0.27527900 | -1.07590200 | -0.08520900 |
| C | 1.13425800  | -1.26739800 | -0.11973000 |
| C | 2.29546200  | -0.51559200 | 0.03814300  |
| C | 2.40290200  | 0.82979400  | 0.46949000  |
| H | 0.87756900  | 1.23993400  | -1.41730000 |
| H | 0.24832900  | 2.94245700  | -1.08750400 |
| H | 0.53349300  | 1.05249500  | 1.46319000  |
| H | 1.55482000  | 2.58217800  | 1.34744400  |
| H | -1.82005300 | 2.01357800  | -0.15105300 |
| H | -0.79530800 | -2.02722800 | -0.01548400 |
| H | 3.35701200  | 1.32475200  | 0.28842700  |
| C | 3.61210200  | -1.19961300 | -0.27284300 |
| H | 3.46941800  | -2.23078500 | -0.60280800 |
| H | 4.14028200  | -0.66262800 | -1.06945000 |
| H | 4.26856600  | -1.20634900 | 0.60376300  |
| H | 1.35232800  | -2.32038300 | -0.29275000 |
| N | -2.59392400 | -0.41919600 | 0.08751500  |
| O | -2.85568300 | -1.59092400 | 0.29770700  |
| O | -3.43222700 | 0.46685100  | 0.06854800  |

### 3- NH<sub>2</sub>-6-NH<sub>2</sub>-substituted

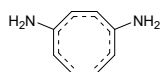

|   |             |             |             |
|---|-------------|-------------|-------------|
| C | 0.67016600  | 1.63416200  | 0.89247200  |
| C | -0.67016900 | 1.63406900  | -0.89252800 |
| C | 1.75217900  | 0.98640600  | 0.34553000  |
| C | 1.77812000  | -0.38943500 | 0.02365400  |
| C | 0.70980100  | -1.28959600 | -0.01977900 |
| C | -0.70980300 | -1.28962300 | 0.01981800  |
| C | -1.77814300 | -0.38948800 | -0.02367100 |
| C | -1.75218100 | 0.98636000  | -0.34553700 |
| H | -0.07441800 | 1.06881800  | 1.43843500  |
| H | 0.74102400  | 2.69034500  | 1.13626600  |
| H | 0.07438000  | 1.06868000  | -1.43849200 |
| H | -0.74098400 | 2.69025300  | -1.13633000 |
| H | 2.62133300  | 1.56618600  | 0.03673400  |
| H | 1.06814300  | -2.31592200 | -0.11708400 |
| H | -2.62128900 | 1.56618700  | -0.03667800 |
| N | -3.05593200 | -0.87916600 | 0.35371300  |
| H | -3.07638900 | -1.87587700 | 0.53375300  |
| H | -3.79504500 | -0.62760900 | -0.29310900 |
| H | -1.06811000 | -2.31596600 | 0.11714800  |
| N | 3.05598800  | -0.87915200 | -0.35366700 |
| H | 3.79488600  | -0.62825200 | 0.29366000  |
| H | 3.07624900  | -1.87574900 | -0.53437600 |

### 3- NH<sub>2</sub>-6-OH-substituted

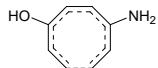

|   |             |             |             |
|---|-------------|-------------|-------------|
| C | 0.73731100  | 1.62919900  | 0.89631400  |
| C | -0.63937200 | 1.63171300  | -0.90674700 |
| C | 1.79374200  | 0.94228200  | 0.35074300  |
| C | 1.75748600  | -0.42831700 | 0.01626300  |
| C | 0.68716900  | -1.31101700 | -0.05696800 |
| C | -0.73064200 | -1.29273400 | 0.00713900  |
| C | -1.77628800 | -0.36838400 | -0.01499100 |
| C | -1.72286900 | 1.00881900  | -0.34233600 |
| H | -0.03262000 | 1.09192400  | 1.43410200  |
| H | 0.84261000  | 2.68403000  | 1.13186600  |
| H | 0.10345200  | 1.04821800  | -1.43617500 |
| H | -0.69185700 | 2.68706700  | -1.15789800 |
| H | 2.68643900  | 1.49326500  | 0.05177500  |
| H | 1.06070900  | -2.32454800 | -0.19674900 |
| H | -2.57941600 | 1.60655100  | -0.03239600 |
| N | -3.05763800 | -0.82628800 | 0.37695100  |
| H | -3.10785200 | -1.82418100 | 0.54322100  |
| H | -3.80654400 | -0.53408200 | -0.24054400 |
| H | -1.10560800 | -2.31345300 | 0.09635100  |
| O | 2.96287300  | -1.02281700 | -0.32356400 |
| H | 3.69195400  | -0.51760500 | 0.05980600  |

### 3- NH<sub>2</sub>-6-F-substituted

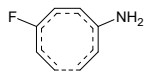

|   |             |             |             |
|---|-------------|-------------|-------------|
| C | 0.78420100  | 1.65131600  | 0.88088000  |
| C | -0.59096100 | 1.61972000  | -0.91326900 |
| C | 1.82754800  | 0.92405600  | 0.35872100  |
| C | 1.72739900  | -0.43540200 | 0.02893100  |
| C | 0.67220300  | -1.32360000 | -0.06561400 |
| C | -0.74345300 | -1.30074500 | 0.00803800  |
| C | -1.77016700 | -0.35421800 | -0.01213100 |
| C | -1.68741500 | 1.01997500  | -0.34686000 |
| H | -0.00052600 | 1.14667200  | 1.42769200  |
| H | 0.92304500  | 2.70506400  | 1.10338400  |
| H | 0.13953800  | 1.01998900  | -1.44172800 |
| H | -0.62813000 | 2.67270600  | -1.17615700 |
| H | 2.76002000  | 1.41135000  | 0.08271700  |
| H | 1.05104100  | -2.33280800 | -0.22193100 |
| H | -2.53136600 | 1.63699800  | -0.04071700 |
| N | -3.05336500 | -0.78527600 | 0.38512000  |
| H | -3.13610800 | -1.78278600 | 0.53779400  |
| H | -3.81032000 | -0.44498300 | -0.19586100 |
| H | -1.13046800 | -2.31663300 | 0.09424800  |
| F | 2.93563300  | -1.00280500 | -0.27749600 |

### 3- NH<sub>2</sub>-6-CHO-substituted

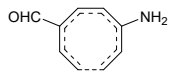

|   |             |             |             |
|---|-------------|-------------|-------------|
| C | -0.03692200 | 1.97092200  | -0.87104900 |
| C | 1.18863100  | 1.49285400  | 1.00923000  |
| C | -1.21507900 | 1.46193500  | -0.38867300 |
| C | -1.48462300 | 0.09560700  | -0.12928700 |
| C | -0.63045200 | -1.01365000 | -0.08944700 |
| C | 0.74444900  | -1.31332400 | -0.10366000 |
| C | 1.96293000  | -0.62128900 | 0.01870400  |
| C | 2.16546100  | 0.71342400  | 0.44645100  |
| H | 0.65132900  | 1.33003600  | -1.40521000 |
| H | 0.06344100  | 3.03861400  | -1.04505700 |
| H | 0.31581700  | 1.03055700  | 1.45305800  |
| H | 1.42216700  | 2.50091800  | 1.33793500  |
| H | -2.00396900 | 2.16446600  | -0.11422700 |
| H | -1.22085800 | -1.92881300 | -0.02713100 |
| H | 3.13564600  | 1.15405300  | 0.22160200  |
| N | 3.11656900  | -1.30953600 | -0.35126000 |
| H | 3.00959300  | -2.29549300 | -0.54895500 |
| H | 3.95416800  | -1.10367500 | 0.17699100  |
| H | 0.90452600  | -2.38552100 | -0.22354600 |
| C | -2.91515400 | -0.20873300 | 0.12800500  |
| H | -3.57419500 | 0.68454200  | 0.15928900  |
| O | -3.39363800 | -1.31117600 | 0.29405400  |

### 3-NH<sub>2</sub>-6-CN-substituted

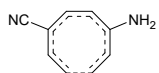

|   |             |             |             |
|---|-------------|-------------|-------------|
| C | -0.22121200 | 1.82794700  | -0.89978200 |
| C | 1.01336400  | 1.52931100  | 0.97352100  |
| C | -1.36993900 | 1.25503000  | -0.41577800 |
| C | -1.52090600 | -0.12676000 | -0.13514100 |
| C | -0.57551200 | -1.16060700 | -0.06451800 |
| C | 0.82520300  | -1.32762800 | -0.06888900 |
| C | 1.97744800  | -0.53131300 | 0.04080700  |
| C | 2.06025300  | 0.82559900  | 0.43391300  |
| H | 0.50244700  | 1.22238300  | -1.42844700 |
| H | -0.19416400 | 2.89530800  | -1.09827700 |
| H | 0.19239900  | 1.00059000  | 1.44164700  |
| H | 1.15561200  | 2.56158900  | 1.27861200  |
| H | -2.21043400 | 1.89408100  | -0.15204100 |
| H | -1.06381000 | -2.13085400 | 0.01552900  |
| H | 2.98686400  | 1.34536500  | 0.19554400  |
| N | 3.19021200  | -1.12459400 | -0.31341300 |
| H | 3.16686500  | -2.11961000 | -0.49332100 |
| H | 3.99829200  | -0.84773400 | 0.22867500  |
| H | 1.07769400  | -2.38353800 | -0.16870400 |
| C | -2.87879300 | -0.54358900 | 0.12966900  |
| N | -3.97181200 | -0.86476600 | 0.34455200  |

### 3-NH<sub>2</sub>-6-NO<sub>2</sub>-substituted

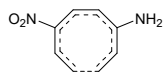

|   |             |            |             |
|---|-------------|------------|-------------|
| C | 0.19236500  | 1.90305500 | -0.86301400 |
| C | 1.39833800  | 1.52375900 | 1.00027600  |
| C | -0.98060300 | 1.36612700 | -0.39630900 |

|   |             |             |             |
|---|-------------|-------------|-------------|
| C | -1.15833400 | -0.01287600 | -0.16105800 |
| C | -0.26195900 | -1.07870500 | -0.11165900 |
| C | 1.12867700  | -1.29370500 | -0.10885500 |
| C | 2.30875900  | -0.53797600 | 0.02524400  |
| C | 2.43126300  | 0.80466300  | 0.45180800  |
| H | 0.89124600  | 1.28792400  | -1.41381000 |
| H | 0.26258600  | 2.97462000  | -1.02426500 |
| H | 0.56559100  | 1.00536600  | 1.45896700  |
| H | 1.56539800  | 2.54496100  | 1.32907600  |
| H | -1.79623600 | 2.02075800  | -0.10827900 |
| H | -0.79518400 | -2.02408700 | -0.06671700 |
| H | 3.37291800  | 1.30436600  | 0.23082000  |
| N | 3.49730500  | -1.16385200 | -0.33672900 |
| H | 3.44835900  | -2.15218600 | -0.54427100 |
| H | 4.32393700  | -0.90940000 | 0.18724800  |
| H | 1.34669300  | -2.35428000 | -0.23343100 |
| N | -2.57189400 | -0.40409100 | 0.08608400  |
| O | -2.83415700 | -1.57233500 | 0.32721600  |
| O | -3.41762100 | 0.47627300  | 0.03785600  |

### 3-OH-6-OH-substituted

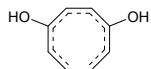

|   |             |             |             |
|---|-------------|-------------|-------------|
| C | -0.67825500 | 1.63501400  | -0.90231400 |
| C | 0.70001600  | 1.62591000  | 0.90698300  |
| C | -1.75888800 | 0.98886600  | -0.35890700 |
| C | -1.76722200 | -0.38143200 | -0.02059400 |
| C | -0.72469800 | -1.30094100 | 0.01751700  |
| C | 0.69239500  | -1.31124200 | -0.06288500 |
| C | 1.74896000  | -0.41374100 | 0.01280000  |
| C | 1.76499100  | 0.95554900  | 0.35874300  |
| H | 0.08297700  | 1.06887100  | -1.42324400 |
| H | -0.75097100 | 2.68902100  | -1.15345400 |
| H | -0.06792200 | 1.07690900  | 1.43551100  |
| H | 0.79361300  | 2.67947700  | 1.15248800  |
| H | -2.65191100 | 1.54540300  | -0.08382600 |
| H | -1.09955100 | -2.32201600 | 0.11693000  |
| H | 2.65137000  | 1.52006200  | 0.06673700  |
| O | 2.96083200  | -0.98850900 | -0.33027800 |
| H | 3.68465700  | -0.46859500 | 0.04347200  |
| H | 1.07471500  | -2.32051100 | -0.20752100 |
| O | -3.03496400 | -0.82976200 | 0.28780600  |
| H | -2.98771000 | -1.71036200 | 0.68461800  |

### 3-OH-6-F-substituted

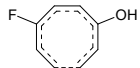

|   |             |             |             |
|---|-------------|-------------|-------------|
| C | 0.75342400  | 1.65049700  | 0.89611000  |
| C | -0.65772000 | 1.61675500  | -0.91751100 |
| C | 1.79877700  | 0.94895000  | 0.35228700  |
| C | 1.72558800  | -0.41473800 | 0.01770300  |
| C | 0.69326200  | -1.32733200 | -0.05342700 |
| C | -0.72164900 | -1.32207000 | 0.05024100  |
| C | -1.75038500 | -0.39288100 | -0.00187700 |

|   |             |             |             |
|---|-------------|-------------|-------------|
| C | -1.72903800 | 0.97903900  | -0.34855300 |
| H | -0.03038500 | 1.12681700  | 1.42649800  |
| H | 0.87362800  | 2.70455200  | 1.12712800  |
| H | 0.09787200  | 1.04394100  | -1.43924600 |
| H | -0.72724300 | 2.67002900  | -1.17132600 |
| H | 2.71899000  | 1.45563900  | 0.07046000  |
| H | 1.08670900  | -2.33144700 | -0.20441900 |
| H | -2.59641100 | 1.56852800  | -0.04942800 |
| O | -2.97185900 | -0.92917100 | 0.35055500  |
| H | -3.68606400 | -0.37333900 | 0.01083900  |
| H | -1.12252900 | -2.32533200 | 0.18189900  |
| F | 2.94297300  | -0.94837200 | -0.30296500 |

### 3-OH-6-CHO-substituted

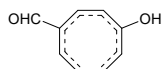

|   |             |             |             |
|---|-------------|-------------|-------------|
| C | -0.01154400 | 1.96070500  | -0.88979200 |
| C | 1.25009500  | 1.46912900  | 1.02808600  |
| C | -1.18385800 | 1.47175700  | -0.38409700 |
| C | -1.47530400 | 0.10605400  | -0.12350500 |
| C | -0.64696900 | -1.01623000 | -0.10597000 |
| C | 0.72950100  | -1.32881700 | -0.15452100 |
| C | 1.93755200  | -0.65458500 | 0.00513900  |
| C | 2.19344200  | 0.66444800  | 0.45096800  |
| H | 0.67615800  | 1.30422800  | -1.40595100 |
| H | 0.10507100  | 3.02579200  | -1.06850400 |
| H | 0.35659900  | 1.03608300  | 1.45884000  |
| H | 1.51238100  | 2.47142800  | 1.35173000  |
| H | -1.95877500 | 2.18643500  | -0.10189100 |
| H | -1.24754700 | -1.92471700 | -0.04616000 |
| H | 3.17946400  | 1.07493800  | 0.23187900  |
| O | 3.02144800  | -1.42383700 | -0.32461900 |
| H | 3.83469200  | -1.01403400 | 0.00125900  |
| H | 0.90806700  | -2.38849200 | -0.32826200 |
| C | -2.91317700 | -0.17136100 | 0.14529400  |
| H | -3.55495200 | 0.73377300  | 0.18596400  |
| O | -3.40764700 | -1.26516800 | 0.31105500  |

### 3-OH-6-CN-substituted

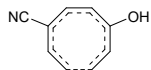

|   |             |             |             |
|---|-------------|-------------|-------------|
| C | -0.20256700 | 1.81698000  | -0.92173300 |
| C | 1.06975300  | 1.51768100  | 0.98823600  |
| C | -1.34471500 | 1.26150400  | -0.41378600 |
| C | -1.51354700 | -0.12213900 | -0.13097000 |
| C | -0.58877500 | -1.16873700 | -0.08271200 |
| C | 0.81456200  | -1.34364100 | -0.11816300 |
| C | 1.95579000  | -0.56090800 | 0.03043700  |
| C | 2.08867200  | 0.78688400  | 0.43823400  |
| H | 0.52331900  | 1.19830600  | -1.43241400 |
| H | -0.16300900 | 2.88281700  | -1.12548600 |
| H | 0.22781400  | 1.01395800  | 1.44534000  |
| H | 1.23761800  | 2.54841000  | 1.28455900  |
| H | -2.17451800 | 1.91118600  | -0.14278400 |



|   |             |             |             |
|---|-------------|-------------|-------------|
| H | -1.08459400 | -2.13529600 | -0.00715100 |
| H | 3.03256300  | 1.28058300  | 0.20662400  |
| O | 3.10581400  | -1.23915200 | -0.27869000 |
| H | 3.87690900  | -0.76170500 | 0.05728200  |
| H | 1.08944600  | -2.38585100 | -0.26936100 |
| C | -2.87743600 | -0.51449600 | 0.14545000  |
| N | -3.97464000 | -0.81113700 | 0.37185100  |

### 3-OH-6-NO<sub>2</sub>-substituted

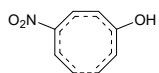

|   |             |             |             |
|---|-------------|-------------|-------------|
| C | 0.20847500  | 1.88935000  | -0.89041500 |
| C | 1.45439600  | 1.50979400  | 1.01545400  |
| C | -0.95621700 | 1.36857600  | -0.39802600 |
| C | -1.14996100 | -0.01196500 | -0.15953000 |
| C | -0.27547100 | -1.08850100 | -0.13014300 |
| C | 1.11929700  | -1.31011200 | -0.15920700 |
| C | 2.28562900  | -0.56834800 | 0.01486300  |
| C | 2.45688000  | 0.76466600  | 0.45389300  |
| H | 0.91090300  | 1.26039000  | -1.42122100 |
| H | 0.29134600  | 2.95910200  | -1.05679100 |
| H | 0.60003500  | 1.01833900  | 1.46268100  |
| H | 1.64647900  | 2.52996300  | 1.33281100  |
| H | -1.76124300 | 2.03288600  | -0.10292700 |
| H | -0.81594900 | -2.02988400 | -0.08737500 |
| H | 3.41465800  | 1.23743000  | 0.23677300  |
| O | 3.41238500  | -1.27608700 | -0.30188800 |
| H | 4.19910100  | -0.82455400 | 0.03415300  |
| H | 1.36035800  | -2.35646100 | -0.33491500 |
| N | -2.57213600 | -0.38227000 | 0.09813500  |
| O | -2.84991700 | -1.54762800 | 0.32756100  |
| O | -3.39983100 | 0.51470500  | 0.07039400  |

### 3-F-6-F-substituted

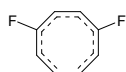

|   |             |             |             |
|---|-------------|-------------|-------------|
| C | 0.70132700  | 1.63847500  | 0.90700500  |
| C | -0.70129900 | 1.63847300  | -0.90697700 |
| C | 1.76077200  | 0.96246500  | 0.35733000  |
| C | 1.71842600  | -0.40092500 | 0.01385500  |
| C | 0.70712600  | -1.33580700 | -0.05892200 |
| C | -0.70713800 | -1.33580600 | 0.05889900  |
| C | -1.71843400 | -0.40091500 | -0.01385700 |
| C | -1.76076600 | 0.96247100  | -0.35733000 |
| H | -0.07153200 | 1.09606500  | 1.43474900  |
| H | 0.80233200  | 2.69193600  | 1.14918100  |
| H | 0.07156000  | 1.09607100  | -1.43472600 |
| H | -0.80229400 | 2.69194400  | -1.14911800 |
| H | 2.66886900  | 1.49095900  | 0.07710400  |
| H | 1.11245600  | -2.33444900 | -0.21137800 |
| H | -2.66898000 | 1.49090700  | -0.07741500 |
| F | -2.94433500 | -0.90330200 | 0.31228100  |
| H | -1.11246800 | -2.33443400 | 0.21140000  |
| F | 2.94433200  | -0.90331800 | -0.31226000 |

3-F-6-CHO-substituted

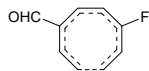

|   |             |             |             |
|---|-------------|-------------|-------------|
| C | 0.03954300  | 1.93192300  | -0.90386000 |
| C | 1.30281600  | 1.47346400  | 1.02764800  |
| C | -1.14244100 | 1.47292200  | -0.39301200 |
| C | -1.46326700 | 0.11477100  | -0.12322300 |
| C | -0.66277800 | -1.02241100 | -0.09696600 |
| C | 0.71598900  | -1.34101500 | -0.16185300 |
| C | 1.90524800  | -0.66124600 | 0.01645400  |
| C | 2.22413500  | 0.63534300  | 0.46077400  |
| H | 0.71433300  | 1.25710400  | -1.41342400 |
| H | 0.17902900  | 2.99246800  | -1.09197700 |
| H | 0.39594000  | 1.07073800  | 1.45912200  |
| H | 1.59383600  | 2.46999600  | 1.34436600  |
| H | -1.90119600 | 2.20606500  | -0.11531500 |
| H | -1.27347800 | -1.92302800 | -0.02656200 |
| H | 3.23623800  | 0.97448000  | 0.25503000  |
| F | 3.00369900  | -1.39893000 | -0.29292600 |
| H | 0.89858200  | -2.39656200 | -0.35593600 |
| C | -2.91108800 | -0.12926000 | 0.14825100  |
| H | -3.53355700 | 0.78888100  | 0.18389600  |
| O | -3.42399500 | -1.21208900 | 0.31898300  |

3-F-6-CN-substituted

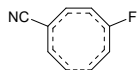

|   |             |             |             |
|---|-------------|-------------|-------------|
| C | -0.16015200 | 1.79231500  | -0.93724700 |
| C | 1.11612200  | 1.53467600  | 0.98357400  |
| C | -1.31029400 | 1.26101700  | -0.42194500 |
| C | -1.50373400 | -0.11835300 | -0.12933700 |
| C | -0.60078300 | -1.17916600 | -0.07525900 |
| C | 0.80540800  | -1.35481900 | -0.12515000 |
| C | 1.92487300  | -0.56364800 | 0.04266700  |
| C | 2.11758200  | 0.76934900  | 0.44646200  |
| H | 0.55643700  | 1.15780900  | -1.44175900 |
| H | -0.10359400 | 2.85518200  | -1.15164000 |
| H | 0.25928300  | 1.06085700  | 1.44409200  |
| H | 1.31157900  | 2.56403200  | 1.26750700  |
| H | -2.12798100 | 1.92692000  | -0.15439600 |
| H | -1.10402100 | -2.14077800 | 0.00820900  |
| H | 3.09310900  | 1.19763100  | 0.23049900  |
| F | 3.08757200  | -1.20642400 | -0.24110600 |
| H | 1.08828000  | -2.39180200 | -0.29624900 |
| C | -2.87566400 | -0.48398300 | 0.15072600  |
| N | -3.97734100 | -0.75948000 | 0.37953400  |

3-F-6-NO<sub>2</sub>-substituted

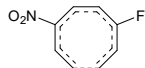

|   |             |             |             |
|---|-------------|-------------|-------------|
| C | 0.24756100  | 1.85906000  | -0.91354800 |
| C | 1.50042900  | 1.52567000  | 1.00968300  |
| C | -0.92321600 | 1.36195500  | -0.41184300 |
| C | -1.13885800 | -0.01361500 | -0.15987300 |
| C | -0.28721500 | -1.10259600 | -0.11957500 |
| C | 1.11166800  | -1.32389300 | -0.16216000 |
| C | 2.25466600  | -0.57212800 | 0.02918500  |
| C | 2.48402400  | 0.74608300  | 0.46043900  |
| H | 0.94285600  | 1.21401700  | -1.43446600 |
| H | 0.34557800  | 2.92510400  | -1.09412600 |
| H | 0.63105900  | 1.06497900  | 1.45997500  |
| H | 1.71898800  | 2.54508800  | 1.31190400  |
| H | -1.71743600 | 2.04147800  | -0.12270200 |
| H | -0.83486800 | -2.03894300 | -0.06441700 |
| H | 3.47104200  | 1.15267000  | 0.25545700  |
| F | 3.39759800  | -1.24364300 | -0.26043400 |
| H | 1.36154700  | -2.36538000 | -0.35392400 |
| N | -2.57234400 | -0.35874300 | 0.10288900  |
| O | -3.37772700 | 0.55671700  | 0.09727500  |
| O | -2.87041100 | -1.52149700 | 0.31174200  |

### 3-CHO-6-CHO-substituted

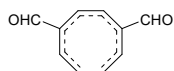

|   |             |             |             |
|---|-------------|-------------|-------------|
| C | -0.43795200 | 1.92267600  | -0.94686000 |
| C | 0.79350100  | 1.67986800  | 1.06787300  |
| C | -1.59525300 | 1.39594200  | -0.44559700 |
| C | -1.80630800 | 0.02569900  | -0.13947200 |
| C | -0.90895500 | -1.02927800 | -0.03706600 |
| C | 0.50045300  | -1.20794600 | -0.05308600 |
| C | 1.63997800  | -0.42844600 | 0.10974600  |
| C | 1.78652400  | 0.92418700  | 0.51231000  |
| H | 0.29777000  | 1.28094600  | -1.41358800 |
| H | -0.36172900 | 2.98519700  | -1.15809000 |
| H | -0.08571800 | 1.20844200  | 1.48824500  |
| H | 0.98530000  | 2.70726200  | 1.36401200  |
| H | -2.41505900 | 2.07540900  | -0.21036800 |
| H | -1.43408600 | -1.98067400 | 0.05179700  |
| H | 2.76072300  | 1.36843100  | 0.31773000  |
| C | 2.91652800  | -1.13987500 | -0.20508400 |
| H | 2.81144900  | -2.21885100 | -0.43934600 |
| O | 4.00446200  | -0.61261400 | -0.22722900 |
| H | 0.74694200  | -2.26000100 | -0.21091800 |
| C | -3.24108900 | -0.33542300 | 0.09387800  |
| H | -3.94062100 | 0.52556900  | 0.08670100  |
| O | -3.66065200 | -1.45440600 | 0.27522600  |

### 3-CHO-6-CN-substituted

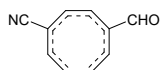

|   |             |             |             |
|---|-------------|-------------|-------------|
| C | 0.58064900  | 1.76407400  | 0.97495400  |
| C | -0.64651900 | 1.67425100  | -1.02337100 |
| C | 1.71723400  | 1.20118900  | 0.46463800  |
| C | 1.84188800  | -0.17667300 | 0.13625900  |
| C | 0.88010200  | -1.17771600 | 0.01585600  |
| C | -0.53924400 | -1.25525600 | 0.02306700  |
| C | -1.62653300 | -0.40209400 | -0.12445600 |
| C | -1.68671800 | 0.96758700  | -0.48745900 |
| H | -0.17585200 | 1.14371200  | 1.43759100  |
| H | 0.55440900  | 2.82321100  | 1.21183700  |
| H | 0.19311200  | 1.15987200  | -1.47329600 |
| H | -0.77265200 | 2.72024900  | -1.28793700 |
| H | 2.57100600  | 1.83440300  | 0.23473800  |
| H | 1.32638300  | -2.16553600 | -0.08321200 |
| H | -2.62915500 | 1.46831600  | -0.27427200 |
| C | -2.94649000 | -1.04033700 | 0.17027700  |
| H | -2.91095000 | -2.12960200 | 0.37623100  |
| O | -3.99800300 | -0.44520500 | 0.20359900  |
| H | -0.85324000 | -2.29214400 | 0.15781400  |
| C | 3.20001800  | -0.61452800 | -0.11015300 |
| N | 4.29066400  | -0.94911700 | -0.30942300 |

### 3-CHO-6-NO<sub>2</sub>-substituted

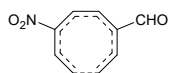

|   |             |             |             |
|---|-------------|-------------|-------------|
| C | -0.16110900 | 1.82928100  | -1.00721100 |
| C | 1.05053800  | 1.71754700  | 1.00395300  |
| C | -1.31809500 | 1.31539400  | -0.49154800 |
| C | -1.46447300 | -0.05221400 | -0.16759200 |
| C | -0.55818700 | -1.08495600 | -0.03282200 |
| C | 0.85833500  | -1.21170900 | -0.02474100 |
| C | 1.97049700  | -0.39375400 | 0.12649600  |
| C | 2.07161000  | 0.97624100  | 0.47858800  |
| H | 0.57545400  | 1.18101000  | -1.46388800 |
| H | -0.09528200 | 2.88629200  | -1.24551300 |
| H | 0.19365000  | 1.23274900  | 1.45419500  |
| H | 1.20517200  | 2.76223800  | 1.25819100  |
| H | -2.14894000 | 1.97085700  | -0.25543400 |
| H | -1.05245200 | -2.04769700 | 0.05968000  |
| H | 3.02995900  | 1.44646300  | 0.26727300  |
| C | 3.27253800  | -1.07748000 | -0.15204700 |
| H | 3.20366300  | -2.16637900 | -0.35007300 |
| O | 4.34177700  | -0.51548900 | -0.18078600 |
| H | 1.13738400  | -2.25921700 | -0.15106800 |
| N | -2.88852300 | -0.46233300 | 0.08346700  |
| O | -3.15943200 | -1.64822200 | 0.11221900  |
| O | -3.70220300 | 0.42870000  | 0.24905400  |

### 3-CN-6-CN-substituted

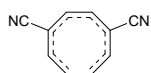

|   |             |            |             |
|---|-------------|------------|-------------|
| C | 0.61280400  | 1.77351200 | 1.01388400  |
| C | -0.61278500 | 1.77350400 | -1.01387900 |

|   |             |             |             |
|---|-------------|-------------|-------------|
| C | 1.70584200  | 1.14453200  | 0.49084400  |
| C | 1.73706000  | -0.23402700 | 0.13610800  |
| C | 0.71107900  | -1.16440700 | -0.00492700 |
| C | -0.71108500 | -1.16440500 | 0.00498100  |
| C | -1.73706000 | -0.23402500 | -0.13610100 |
| C | -1.70582600 | 1.14453200  | -0.49084000 |
| H | -0.19121100 | 1.19960700  | 1.45649900  |
| H | 0.65758100  | 2.82795800  | 1.26832400  |
| H | 0.19122400  | 1.19959500  | -1.45650100 |
| H | -0.65755500 | 2.82795200  | -1.26831200 |
| H | 2.60244800  | 1.72098700  | 0.27508300  |
| H | 1.09203400  | -2.17687300 | -0.12452800 |
| H | -2.60245600 | 1.72097800  | -0.27515800 |
| C | -3.06291400 | -0.75858900 | 0.11490600  |
| N | -4.12909900 | -1.16252800 | 0.31732800  |
| H | -1.09204500 | -2.17686300 | 0.12460000  |
| C | 3.06290300  | -0.75859900 | -0.11492700 |
| N | 4.12908100  | -1.16254400 | -0.31737100 |

### 3-CN-6-NO<sub>2</sub>-substituted

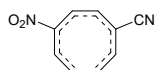

|   |             |             |             |
|---|-------------|-------------|-------------|
| C | -0.18182300 | 1.86540100  | -1.04023100 |
| C | 1.02895200  | 1.82203200  | 1.00002000  |
| C | -1.30325300 | 1.29080300  | -0.51502800 |
| C | -1.36923600 | -0.08000700 | -0.17103300 |
| C | -0.40607700 | -1.05523300 | -0.01753200 |
| C | 1.01535300  | -1.11850600 | -0.01319000 |
| C | 2.07668900  | -0.23177300 | 0.13585700  |
| C | 2.09885700  | 1.14848800  | 0.48534300  |
| H | 0.59916600  | 1.25832500  | -1.48004700 |
| H | -0.17909300 | 2.92147700  | -1.29140500 |
| H | 0.20048500  | 1.28343000  | 1.44184300  |
| H | 1.11301300  | 2.87570700  | 1.24766100  |
| H | -2.17349600 | 1.89742800  | -0.29011000 |
| H | -0.84671000 | -2.04187800 | 0.09335600  |
| H | 3.01906700  | 1.68798900  | 0.27369100  |
| C | 3.38259800  | -0.81160300 | -0.09962300 |
| N | 4.43353700  | -1.25930300 | -0.28849700 |
| H | 1.35239200  | -2.14670800 | -0.12801700 |
| N | -2.76753900 | -0.56848400 | 0.08627800  |
| O | -2.97060400 | -1.76718600 | 0.12491600  |
| O | -3.62929100 | 0.27732700  | 0.24521700  |

### 3-NO<sub>2</sub>-6-NO<sub>2</sub>-substituted

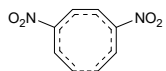

|   |             |             |             |
|---|-------------|-------------|-------------|
| C | -0.59996800 | 1.92877000  | -1.02693500 |
| C | 0.60004700  | 1.92866500  | 1.02724200  |
| C | -1.69895000 | 1.30779400  | -0.50798900 |
| C | -1.71106800 | -0.06606800 | -0.16926600 |
| C | -0.71178000 | -1.00130800 | -0.00978400 |
| C | 0.71179000  | -1.00133000 | 0.01000100  |
| C | 1.71109800  | -0.06608900 | 0.16934800  |

|   |             |             |             |
|---|-------------|-------------|-------------|
| C | 1.69902100  | 1.30773100  | 0.50822000  |
| H | 0.20723200  | 1.35694500  | -1.46679000 |
| H | -0.63702300 | 2.98592400  | -1.27073800 |
| H | -0.20716600 | 1.35679400  | 1.46701000  |
| H | 0.63712500  | 2.98578300  | 1.27119300  |
| H | -2.59377100 | 1.87784400  | -0.28397200 |
| H | -1.11082400 | -2.00595600 | 0.09572800  |
| H | 2.59387500  | 1.87777500  | 0.28431600  |
| N | 3.09171200  | -0.61175800 | -0.07450000 |
| O | 3.98438100  | 0.19898900  | -0.24306100 |
| O | 3.24784200  | -1.81733200 | -0.09416700 |
| H | 1.11080500  | -2.00598800 | -0.09552400 |
| N | -3.09174700 | -0.61175700 | 0.07431000  |
| O | -3.24782000 | -1.81733700 | 0.09444400  |
| O | -3.98454700 | 0.19899200  | 0.24217000  |

### 5.3.17 4,5-substituted

#### 4-CH<sub>3</sub>-5-CH<sub>3</sub>-substituted

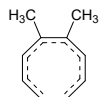

|   |             |             |             |
|---|-------------|-------------|-------------|
| C | -2.09303800 | -0.64873700 | -0.92772900 |
| C | -2.09326000 | 0.64862100  | 0.92757800  |
| C | -1.39468300 | -1.69423500 | -0.36865800 |
| C | -0.04995400 | -1.68421800 | 0.05759400  |
| C | 0.94699200  | -0.71036700 | 0.13063500  |
| C | 0.94695900  | 0.71045600  | -0.13052300 |
| C | -0.05003700 | 1.68425100  | -0.05736100 |
| C | -1.39484600 | 1.69415500  | 0.36865300  |
| H | -1.56572200 | 0.13997700  | -1.44537900 |
| H | -3.13711200 | -0.78531900 | -1.19773900 |
| H | -1.56604300 | -0.14005700 | 1.44538200  |
| H | -3.13742100 | 0.78513200  | 1.19728700  |
| H | 0.28354200  | -2.66282500 | 0.39847800  |
| H | 0.28343000  | 2.66291800  | -0.39809600 |
| H | -1.95231800 | 2.59396200  | 0.11162000  |
| H | -1.95216200 | -2.59405900 | -0.11169800 |
| C | 2.31570600  | 1.28228800  | -0.49427700 |
| H | 2.80967800  | 0.69748500  | -1.27693300 |
| H | 2.22132100  | 2.30807000  | -0.85581100 |
| H | 2.99189200  | 1.30397500  | 0.36839700  |
| C | 2.31578500  | -1.28220500 | 0.49420200  |
| H | 2.99161300  | -1.30443000 | -0.36874600 |
| H | 2.81019800  | -0.69706300 | 1.27635100  |
| H | 2.22135700  | -2.30782000 | 0.85620300  |

#### 4-CH<sub>3</sub>-5-NH<sub>2</sub>-substituted

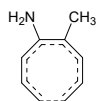

|   |             |             |             |
|---|-------------|-------------|-------------|
| C | -2.10147700 | -0.59976300 | -0.94596600 |
| C | -2.05348300 | 0.74054700  | 0.91587300  |

|   |             |             |             |
|---|-------------|-------------|-------------|
| C | -1.44009600 | -1.65281200 | -0.35846600 |
| C | -0.10963900 | -1.68606300 | 0.10054700  |
| C | 0.92672600  | -0.74807200 | 0.14797800  |
| C | 0.99283700  | 0.66978400  | -0.13352400 |
| C | 0.03880600  | 1.68018200  | -0.05633700 |
| C | -1.30820600 | 1.75369800  | 0.36137100  |
| H | -1.55035600 | 0.17533700  | -1.45965700 |
| H | -3.14560500 | -0.71320700 | -1.22457300 |
| H | -1.56446500 | -0.07569300 | 1.42922500  |
| H | -3.09337500 | 0.92008900  | 1.17651000  |
| H | 0.18681500  | -2.66425500 | 0.47951900  |
| H | 0.41811000  | 2.63963800  | -0.40528400 |
| H | -1.82277700 | 2.67603100  | 0.09631900  |
| H | -2.03025700 | -2.52945100 | -0.09358900 |
| C | 2.38884100  | 1.16263100  | -0.50111800 |
| H | 2.89303100  | 0.46919000  | -1.17905100 |
| H | 2.33165600  | 2.14506400  | -0.97467300 |
| H | 3.03349100  | 1.27727900  | 0.38200000  |
| N | 2.19709400  | -1.31126300 | 0.41034600  |
| H | 2.16900500  | -2.28527600 | 0.68327100  |
| H | 2.78922400  | -0.77669800 | 1.03541200  |

#### 4-CH<sub>3</sub>-5-OH-substituted

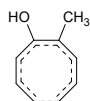

|   |             |             |             |
|---|-------------|-------------|-------------|
| C | 2.11555100  | -0.59033600 | 0.92146600  |
| C | 2.01932100  | 0.81116100  | -0.89509900 |
| C | 1.47588400  | -1.63989100 | 0.30855400  |
| C | 0.13075100  | -1.68812100 | -0.10992300 |
| C | -0.90110700 | -0.75430200 | -0.14013200 |
| C | -1.02212900 | 0.65639800  | 0.12162000  |
| C | -0.08905500 | 1.68687400  | 0.09444800  |
| C | 1.26423000  | 1.78984700  | -0.29655900 |
| H | 1.54903500  | 0.15106100  | 1.46761500  |
| H | 3.16740500  | -0.67892700 | 1.17851300  |
| H | 1.53646900  | 0.00968400  | -1.43773300 |
| H | 3.05709500  | 1.00958200  | -1.14932100 |
| H | -0.16847000 | -2.66506300 | -0.49345800 |
| H | -0.49721600 | 2.63134800  | 0.45053500  |
| H | 1.76606600  | 2.70781200  | 0.00559000  |
| H | 2.07929500  | -2.49402900 | 0.00442800  |
| C | -2.45183500 | 1.09137900  | 0.41568200  |
| H | -2.92387500 | 0.44514800  | 1.16091800  |
| H | -2.46834600 | 2.12132100  | 0.77840000  |
| H | -3.07083400 | 1.03621100  | -0.48575300 |
| O | -2.14616000 | -1.27629700 | -0.44634400 |
| H | -2.10700500 | -2.24182000 | -0.42932300 |

#### 4-CH<sub>3</sub>-5-F-substituted

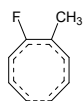

|   |             |             |             |
|---|-------------|-------------|-------------|
| C | 2.13359000  | -0.56140100 | 0.89921000  |
| C | 1.96453600  | 0.89929600  | -0.89288100 |
| C | 1.53231500  | -1.62258000 | 0.27209300  |
| C | 0.17511700  | -1.70528800 | -0.10600000 |
| C | -0.83953600 | -0.76989500 | -0.13053100 |
| C | -1.04754200 | 0.62438700  | 0.11852700  |
| C | -0.15986400 | 1.69242700  | 0.12604900  |
| C | 1.19462400  | 1.83656700  | -0.25285600 |
| H | 1.54109400  | 0.14599500  | 1.46338100  |
| H | 3.19294500  | -0.60107200 | 1.13665900  |
| H | 1.49634500  | 0.09588500  | -1.44603900 |
| H | 2.99586400  | 1.12587000  | -1.14843400 |
| H | -0.16217800 | -2.67676800 | -0.45975500 |
| H | -0.60595700 | 2.61606500  | 0.49079100  |
| H | 1.67537800  | 2.75729800  | 0.07422600  |
| H | 2.15807900  | -2.45132300 | -0.05435300 |
| C | -2.50610400 | 0.97337900  | 0.38151400  |
| H | -2.95923800 | 0.29898100  | 1.11318300  |
| H | -2.58818400 | 1.99792400  | 0.75013400  |
| H | -3.09720700 | 0.89457300  | -0.53660800 |
| F | -2.03664000 | -1.37830900 | -0.43043700 |

#### 4-CH<sub>3</sub>-5-CHO-substituted

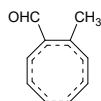

|   |             |             |             |
|---|-------------|-------------|-------------|
| C | 1.99339800  | -1.20634900 | 0.92773800  |
| C | 2.34722000  | -0.10091500 | -1.03247000 |
| C | 0.93343400  | -1.96633000 | 0.48452500  |
| C | -0.33564200 | -1.47980800 | 0.12412900  |
| C | -0.87471400 | -0.19964600 | 0.00095900  |
| C | -0.35985100 | 1.14279500  | 0.15856000  |
| C | 0.91126200  | 1.67574300  | -0.02278300 |
| C | 2.13166400  | 1.15042200  | -0.50675900 |
| H | 1.81407300  | -0.25231000 | 1.40326800  |
| H | 2.94206100  | -1.68564500 | 1.15571500  |
| H | 1.53091700  | -0.66065100 | -1.46708000 |
| H | 3.34659300  | -0.38270900 | -1.35311400 |
| H | -1.05933200 | -2.25349600 | -0.12603900 |
| H | 0.98866200  | 2.72154800  | 0.27094700  |
| H | 3.00327000  | 1.78058100  | -0.33325800 |
| H | 1.10810600  | -3.02211600 | 0.28527600  |
| C | -1.39349000 | 2.18981600  | 0.58491700  |
| H | -2.17091600 | 1.77279000  | 1.22987600  |
| H | -0.89752800 | 2.98508600  | 1.14661200  |
| H | -1.88247100 | 2.66456000  | -0.27406700 |
| C | -2.33349100 | -0.25344200 | -0.37727400 |
| H | -2.78733900 | 0.70157400  | -0.69248200 |
| O | -3.00685500 | -1.26036600 | -0.41186300 |

#### 4-CH<sub>3</sub>-5-CN-substituted

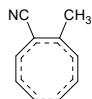



|   |             |             |             |
|---|-------------|-------------|-------------|
| C | -2.14975300 | -1.00726100 | -0.89002300 |
| C | -2.32155500 | 0.29444800  | 1.01709100  |
| C | -1.25313500 | -1.89943600 | -0.35568400 |
| C | 0.08752800  | -1.62293500 | -0.02225600 |
| C | 0.83007200  | -0.44013300 | 0.01873600  |
| C | 0.57901000  | 0.97334500  | -0.17393800 |
| C | -0.58224600 | 1.72412700  | -0.05705600 |
| C | -1.89178000 | 1.44066600  | 0.40037100  |
| H | -1.79909800 | -0.13113000 | -1.41801400 |
| H | -3.16777700 | -1.32237800 | -1.10242700 |
| H | -1.61517300 | -0.36983100 | 1.49561100  |
| H | -3.35830500 | 0.20316300  | 1.32904100  |
| H | 0.66266700  | -2.50017900 | 0.26607000  |
| H | -0.46038900 | 2.75668500  | -0.37786700 |
| H | -2.63897800 | 2.19534500  | 0.15802700  |
| H | -1.61176700 | -2.88760700 | -0.07463900 |
| C | 1.82685200  | 1.77896200  | -0.51776300 |
| H | 2.39012200  | 1.32477200  | -1.33848300 |
| H | 1.56187800  | 2.79850100  | -0.80315200 |
| H | 2.50304300  | 1.83575100  | 0.34249700  |
| C | 2.23198200  | -0.73607700 | 0.26968700  |
| N | 3.34170500  | -0.99104600 | 0.48405100  |

4-CH<sub>3</sub>-5-NO<sub>2</sub>-substituted

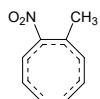

|   |             |             |             |
|---|-------------|-------------|-------------|
| C | -2.36410100 | -1.16587200 | -0.79093700 |
| C | -2.54704200 | 0.18529500  | 1.04362000  |
| C | -1.36117800 | -1.96208700 | -0.29151800 |
| C | -0.03588400 | -1.55513500 | -0.04137500 |
| C | 0.56154300  | -0.30669800 | -0.04228500 |
| C | 0.21871700  | 1.06531200  | -0.28554300 |
| C | -1.00059200 | 1.71820200  | -0.16521200 |
| C | -2.25394200 | 1.34677800  | 0.37223000  |
| H | -2.11838200 | -0.29170200 | -1.37733100 |
| H | -3.35915700 | -1.57806800 | -0.93412500 |
| H | -1.75963700 | -0.38203300 | 1.52069600  |
| H | -3.55459300 | 0.01394800  | 1.41214500  |
| H | 0.64218100  | -2.35937600 | 0.23094300  |
| H | -0.98459100 | 2.73209800  | -0.56135400 |
| H | -3.07765700 | 2.01926300  | 0.13742200  |
| H | -1.61245300 | -2.96763200 | 0.03904800  |
| C | 1.36042100  | 1.95933000  | -0.76880700 |
| H | 2.12754700  | 1.40393400  | -1.31475500 |
| H | 0.95986900  | 2.71730500  | -1.44605500 |
| H | 1.84570700  | 2.46861000  | 0.06804400  |
| N | 2.02872400  | -0.45877100 | 0.26141200  |
| O | 2.48674300  | 0.26075100  | 1.13014800  |
| O | 2.66606200  | -1.29521300 | -0.35334800 |

4- NH<sub>2</sub>-5-NH<sub>2</sub>-substituted

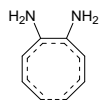

|   |             |             |             |
|---|-------------|-------------|-------------|
| C | 2.07182800  | -0.70133300 | 0.91152400  |
| C | 2.07188400  | 0.70130400  | -0.91148800 |
| C | 1.36426600  | -1.71734100 | 0.31473300  |
| C | 0.02170500  | -1.68661100 | -0.11170700 |
| C | -0.97368300 | -0.71098900 | -0.13836000 |
| C | -0.97367600 | 0.71100700  | 0.13835700  |
| C | 0.02171800  | 1.68662500  | 0.11164200  |
| C | 1.36430400  | 1.71731600  | -0.31472000 |
| H | 1.55453200  | 0.08186600  | 1.44875400  |
| H | 3.11573900  | -0.85581800 | 1.17030900  |
| H | 1.55460700  | -0.08188800 | -1.44874800 |
| H | 3.11580700  | 0.85578400  | -1.17022500 |
| H | 1.91452400  | -2.60908500 | 0.01772900  |
| H | -0.32803800 | -2.64653600 | -0.49242400 |
| H | -0.32802700 | 2.64657500  | 0.49229300  |
| N | -2.28620800 | -1.20346800 | -0.35360700 |
| H | -2.30808700 | -2.16941700 | -0.65584700 |
| H | -2.85040800 | -0.60961600 | -0.95526600 |
| H | 1.91455900  | 2.60907400  | -0.01774200 |
| N | -2.28619000 | 1.20349700  | 0.35362500  |
| H | -2.85042300 | 0.60957000  | 0.95517600  |
| H | -2.30806600 | 2.16941000  | 0.65597900  |

#### 4- NH<sub>2</sub>-5-OH-substituted

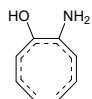

|   |             |             |             |
|---|-------------|-------------|-------------|
| C | 2.08901100  | -0.69970100 | 0.89480400  |
| C | 2.04848600  | 0.77382300  | -0.90165100 |
| C | 1.39488100  | -1.70518200 | 0.27235400  |
| C | 0.03833100  | -1.68215800 | -0.11930300 |
| C | -0.95721300 | -0.71723000 | -0.13434200 |
| C | -1.01610500 | 0.70523600  | 0.11543200  |
| C | -0.02466500 | 1.68721800  | 0.14945200  |
| C | 1.32370700  | 1.74364000  | -0.25466200 |
| H | 1.56468700  | 0.06267800  | 1.45489100  |
| H | 3.13981600  | -0.83902300 | 1.13276600  |
| H | 1.54768800  | -0.00335800 | -1.46331200 |
| H | 3.08992600  | 0.95654300  | -1.15043200 |
| H | 1.95104100  | -2.57979400 | -0.06086100 |
| H | -0.31354000 | -2.64256200 | -0.50102600 |
| H | -0.39683300 | 2.63542100  | 0.53779300  |
| H | 1.85991300  | 2.63011600  | 0.08220400  |
| N | -2.32545900 | 1.17524200  | 0.27845300  |
| H | -2.99968600 | 0.51259000  | 0.63628800  |
| H | -2.40419100 | 2.10108200  | 0.67532200  |
| O | -2.23833100 | -1.19210400 | -0.38529800 |
| H | -2.23256400 | -2.15743200 | -0.34293100 |

#### 4- NH<sub>2</sub>-5-F-substituted

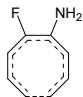

|   |             |             |             |
|---|-------------|-------------|-------------|
| C | 2.11144400  | -0.64587600 | 0.87671400  |
| C | 1.98118800  | 0.86719600  | -0.90801800 |
| C | 1.46256600  | -1.67966300 | 0.25488500  |
| C | 0.09612900  | -1.70428700 | -0.10418600 |
| C | -0.88907100 | -0.74407700 | -0.12899800 |
| C | -1.04722000 | 0.66439400  | 0.11883100  |
| C | -0.10857400 | 1.69334900  | 0.17675500  |
| C | 1.23782200  | 1.79890900  | -0.23026800 |
| H | 1.55403100  | 0.08707900  | 1.44453300  |
| H | 3.17172800  | -0.72645100 | 1.09926400  |
| H | 1.49728300  | 0.07971200  | -1.47085100 |
| H | 3.01473500  | 1.08132300  | -1.16337600 |
| H | 2.04787200  | -2.53205900 | -0.08393500 |
| H | -0.28299900 | -2.66264800 | -0.45279000 |
| H | -0.52019000 | 2.61795700  | 0.58062300  |
| H | 1.74972100  | 2.69457400  | 0.11968200  |
| N | -2.38692100 | 1.04419800  | 0.26443500  |
| H | -3.01353700 | 0.35809600  | 0.66291400  |
| H | -2.52864100 | 1.97728900  | 0.62597500  |
| F | -2.11636200 | -1.30932500 | -0.39415400 |

#### 4- NH<sub>2</sub>-5-CHO-substituted

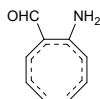

|   |             |             |             |
|---|-------------|-------------|-------------|
| C | 1.94136400  | -1.24864000 | 0.91523400  |
| C | 2.28937300  | -0.15990400 | -1.07801100 |
| C | 0.84699200  | -1.99344500 | 0.53284400  |
| C | -0.40532200 | -1.46721500 | 0.16648300  |
| C | -0.88275300 | -0.16994000 | 0.00708100  |
| C | -0.30679300 | 1.14650500  | 0.21670900  |
| C | 0.96512700  | 1.66833900  | -0.00946400 |
| C | 2.13283600  | 1.10779500  | -0.56770600 |
| H | 1.80253100  | -0.27146300 | 1.35722400  |
| H | 2.88189100  | -1.74679900 | 1.13598900  |
| H | 1.43831000  | -0.70505800 | -1.46145400 |
| H | 3.26462700  | -0.47351900 | -1.43920200 |
| H | 0.97979000  | -3.06060500 | 0.36727000  |
| H | -1.15916300 | -2.21037600 | -0.08896400 |
| H | 1.08093100  | 2.69904100  | 0.32411600  |
| H | 3.02927300  | 1.71536200  | -0.44852000 |
| N | -1.28170700 | 2.06624800  | 0.63625400  |
| H | -1.87154400 | 1.76529100  | 1.40231100  |
| H | -0.96855600 | 3.02181400  | 0.74839700  |
| C | -2.30640600 | -0.12598000 | -0.47343000 |
| H | -2.62462700 | 0.83675000  | -0.90711800 |
| O | -3.06600100 | -1.07240800 | -0.46278400 |

#### 4-NH<sub>2</sub>-5-CN-substituted

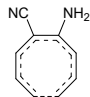

|   |             |             |             |
|---|-------------|-------------|-------------|
| C | -2.10940200 | -1.06820100 | -0.89010100 |
| C | -2.30412200 | 0.25106600  | 1.06976700  |
| C | -1.17378000 | -1.93296200 | -0.38341900 |
| C | 0.15642400  | -1.60883100 | -0.04269000 |
| C | 0.86395100  | -0.41017300 | 0.02840500  |
| C | 0.55837400  | 0.99404900  | -0.20442400 |
| C | -0.63460800 | 1.70613200  | -0.10063700 |
| C | -1.90686200 | 1.39488900  | 0.42889300  |
| H | -1.80512800 | -0.15647200 | -1.38576200 |
| H | -3.11592800 | -1.42084000 | -1.09810900 |
| H | -1.58192800 | -0.41954900 | 1.51465400  |
| H | -3.33087300 | 0.15285600  | 1.40958200  |
| H | -1.48781300 | -2.94089000 | -0.12145900 |
| H | 0.75746800  | -2.46746800 | 0.24917300  |
| H | -0.55618300 | 2.72461500  | -0.47832800 |
| H | -2.67692600 | 2.13269000  | 0.20579400  |
| N | 1.68846000  | 1.75410700  | -0.49539500 |
| H | 2.42879800  | 1.33386100  | -1.04177100 |
| H | 1.53886000  | 2.73323900  | -0.69173900 |
| C | 2.26769400  | -0.64399700 | 0.30812500  |
| N | 3.38634400  | -0.86323100 | 0.51745800  |

#### 4-NH<sub>2</sub>-5-NO<sub>2</sub>-substituted

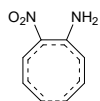

|   |             |             |             |
|---|-------------|-------------|-------------|
| C | -2.32124000 | -1.04839900 | -1.02185000 |
| C | -2.54734500 | -0.00756700 | 1.10432300  |
| C | -1.29964500 | -1.88053000 | -0.64174000 |
| C | -0.00321700 | -1.48783800 | -0.24810600 |
| C | 0.60400700  | -0.25565200 | -0.08476000 |
| C | 0.21612900  | 1.13500800  | -0.19530600 |
| C | -1.03582100 | 1.70477600  | 0.05493100  |
| C | -2.24687700 | 1.23395500  | 0.60401400  |
| H | -2.11773800 | -0.05593500 | -1.39930300 |
| H | -3.29505100 | -1.46762700 | -1.26004900 |
| H | -1.77392900 | -0.68256500 | 1.44278600  |
| H | -3.55303600 | -0.20813000 | 1.46234200  |
| H | -1.51999900 | -2.93579500 | -0.49925100 |
| H | 0.65022500  | -2.31676600 | 0.01160300  |
| H | -1.06929100 | 2.75060900  | -0.24584300 |
| N | 2.04976300  | -0.46989600 | 0.24474400  |
| H | -3.07434100 | 1.93545000  | 0.50319200  |
| N | 1.18833900  | 2.04816400  | -0.57483400 |
| H | 2.10685800  | 1.72016200  | -0.83223100 |
| H | 1.14846400  | 2.96508300  | -0.15597600 |
| O | 2.30042400  | -1.12883900 | 1.23398900  |
| O | 2.90397200  | -0.01052000 | -0.50219900 |

#### 4-OH-5-OH-substituted

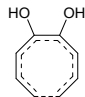

|   |             |             |             |
|---|-------------|-------------|-------------|
| C | 2.04781100  | -0.71463300 | 0.89540600  |
| C | 2.04818700  | 0.71432500  | -0.89533100 |
| C | 1.34272100  | -1.72121300 | 0.28165600  |
| C | -0.00847400 | -1.68723900 | -0.11841900 |
| C | -0.99546300 | -0.70926700 | -0.12692100 |
| C | -0.99527600 | 0.70941600  | 0.12687200  |
| C | -0.00810600 | 1.68721300  | 0.11829100  |
| C | 1.34314400  | 1.72095800  | -0.28160900 |
| H | 1.52858800  | 0.04973500  | 1.45773700  |
| H | 3.09507000  | -0.86631800 | 1.14098000  |
| H | 1.52896300  | -0.04991300 | -1.45783100 |
| H | 3.09551100  | 0.86588600  | -1.14070400 |
| H | 1.89292600  | -2.60268500 | -0.04347600 |
| H | -0.36704300 | -2.63819000 | -0.51548200 |
| H | -0.36651900 | 2.63827100  | 0.51524300  |
| H | 1.89343900  | 2.60234200  | 0.04360400  |
| O | -2.27156500 | 1.13956800  | 0.40721800  |
| H | -2.30027800 | 2.10394000  | 0.35145900  |
| O | -2.27183500 | -1.13918100 | -0.40722200 |
| H | -2.30072300 | -2.10353200 | -0.35117000 |

#### 4-OH-5-F-substituted

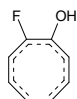

|   |             |             |             |
|---|-------------|-------------|-------------|
| C | 2.07215200  | -0.66181600 | 0.87505100  |
| C | 1.98333500  | 0.81611400  | -0.90146800 |
| C | 1.41441700  | -1.69595700 | 0.25845300  |
| C | 0.05075700  | -1.71158000 | -0.10384700 |
| C | -0.92767000 | -0.74126000 | -0.11918200 |
| C | -1.02802900 | 0.66920200  | 0.12753600  |
| C | -0.09405400 | 1.69537400  | 0.14944800  |
| C | 1.25674100  | 1.78022800  | -0.24984500 |
| H | 1.51857400  | 0.07019400  | 1.44805600  |
| H | 3.13042300  | -0.75258800 | 1.10285500  |
| H | 1.48153200  | 0.04153400  | -1.46629400 |
| H | 3.02284900  | 1.00289200  | -1.15426200 |
| H | 1.99545900  | -2.55265500 | -0.07696500 |
| H | -0.33399300 | -2.66275400 | -0.46504700 |
| H | -0.49660900 | 2.62277100  | 0.55858200  |
| H | 1.78134400  | 2.67110500  | 0.09167100  |
| F | -2.15177800 | -1.26416300 | -0.40650900 |
| O | -2.33327400 | 1.00845500  | 0.38576200  |
| H | -2.43327000 | 1.96749500  | 0.31700700  |

#### 4-OH-5-CHO-substituted

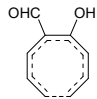

|   |             |             |             |
|---|-------------|-------------|-------------|
| C | -1.89232300 | -1.32408400 | -0.89966000 |
| C | -2.33655900 | -0.15911300 | 1.04569600  |
| C | -0.80022100 | -2.01880100 | -0.43392800 |
| C | 0.44301900  | -1.45330000 | -0.09425800 |
| C | 0.90817300  | -0.14596700 | -0.00616700 |
| C | 0.29122200  | 1.14488200  | -0.19282700 |
| C | -0.99183200 | 1.64759400  | -0.02944000 |
| C | -2.18291300 | 1.07894000  | 0.47376400  |
| H | -1.75749300 | -0.36781800 | -1.38644000 |
| H | -2.81743300 | -1.85066900 | -1.11845800 |
| H | -1.49315900 | -0.66930600 | 1.48984100  |
| H | -3.32123100 | -0.48073300 | 1.37227100  |
| H | -0.91855600 | -3.07636200 | -0.20694800 |
| H | 1.21405600  | -2.17289300 | 0.17654200  |
| H | -1.10412400 | 2.67344200  | -0.38198500 |
| H | -3.08324800 | 1.65812500  | 0.27346200  |
| O | 1.24018100  | 2.05489900  | -0.61043400 |
| H | 0.91779700  | 2.95758800  | -0.47853700 |
| C | 2.36940700  | -0.06912100 | 0.35675400  |
| H | 2.74442100  | 0.92661800  | 0.63702700  |
| O | 3.10621000  | -1.03042000 | 0.39838600  |

#### 4-OH-5-CN-substituted

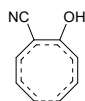

|   |             |             |             |
|---|-------------|-------------|-------------|
| C | -2.06731400 | -1.11185600 | -0.86791300 |
| C | -2.30821600 | 0.22378400  | 1.04150700  |
| C | -1.12444200 | -1.95521800 | -0.33704700 |
| C | 0.20569800  | -1.60969400 | -0.02164800 |
| C | 0.88752800  | -0.39549200 | 0.00668800  |
| C | 0.52809300  | 0.98943200  | -0.20172100 |
| C | -0.65160500 | 1.70674800  | -0.08924700 |
| C | -1.93571200 | 1.37602000  | 0.40171500  |
| H | -1.76587800 | -0.21793800 | -1.39727200 |
| H | -3.07085200 | -1.47715500 | -1.06755400 |
| H | -1.57057700 | -0.40888000 | 1.51610100  |
| H | -3.33760800 | 0.09184800  | 1.36140800  |
| H | -1.42984800 | -2.95791000 | -0.04624300 |
| H | 0.82873000  | -2.45067000 | 0.27424500  |
| H | -0.56752300 | 2.72709700  | -0.46340800 |
| H | -2.71715000 | 2.09254500  | 0.15273300  |
| O | 1.64472900  | 1.69750300  | -0.56720700 |
| H | 1.50659100  | 2.64357000  | -0.42045400 |
| C | 2.30520900  | -0.57432100 | 0.26101500  |
| N | 3.41869300  | -0.78842300 | 0.49543000  |

#### 4-OH-5-NO<sub>2</sub>-substituted

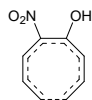

|   |             |             |             |
|---|-------------|-------------|-------------|
| C | -2.27623300 | -1.09416500 | -1.03065900 |
| C | -2.60224000 | 0.00103000  | 1.06762400  |
| C | -1.26824700 | -1.90509400 | -0.57981900 |
| C | 0.02223700  | -1.49624700 | -0.18148000 |
| C | 0.61446800  | -0.25264300 | -0.05299400 |
| C | 0.18818500  | 1.12616000  | -0.15953100 |
| C | -1.05336800 | 1.70267600  | 0.06588900  |
| C | -2.29502100 | 1.22987300  | 0.54784700  |
| H | -2.06465800 | -0.11137100 | -1.42893400 |
| H | -3.24076300 | -1.52380900 | -1.28645300 |
| H | -1.83667600 | -0.65829700 | 1.45156300  |
| H | -3.62064300 | -0.20818200 | 1.38230500  |
| H | -1.48971000 | -2.95549000 | -0.40642400 |
| H | 0.68442900  | -2.31167500 | 0.09550600  |
| H | -1.03449300 | 2.75757600  | -0.19707200 |
| H | -3.12021500 | 1.92464300  | 0.39791600  |
| O | 1.12266400  | 2.06737500  | -0.46473400 |
| H | 1.93612200  | 1.65136700  | -0.80268300 |
| N | 2.07685000  | -0.42408400 | 0.21873000  |
| O | 2.87931800  | 0.18628100  | -0.48489400 |
| O | 2.40676500  | -1.18687000 | 1.09986700  |

#### 4-F-5-F-substituted

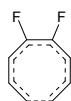

|   |             |             |             |
|---|-------------|-------------|-------------|
| C | 2.01161600  | -0.76024800 | 0.87766100  |
| C | 2.01181800  | 0.76009700  | -0.87766300 |
| C | 1.32853500  | -1.75678700 | 0.22989900  |
| C | -0.03675600 | -1.72318000 | -0.13018200 |
| C | -0.96276700 | -0.70513500 | -0.11890700 |
| C | -0.96267300 | 0.70519600  | 0.11892200  |
| C | -0.03655400 | 1.72315100  | 0.13012700  |
| C | 1.32877400  | 1.75664800  | -0.22986100 |
| H | 1.47554000  | -0.01863700 | 1.45551700  |
| H | 3.06429900  | -0.88724000 | 1.11256500  |
| H | 1.47574900  | 0.01857200  | -1.45564400 |
| H | 3.06453600  | 0.88701900  | -1.11245100 |
| H | 1.88431900  | -2.62434900 | -0.12017800 |
| H | -0.46342800 | -2.65303300 | -0.49912500 |
| H | -0.46316900 | 2.65308200  | 0.49894400  |
| F | -2.22309700 | -1.13865500 | -0.38556400 |
| H | 1.88463000  | 2.62408300  | 0.12044800  |
| F | -2.22295100 | 1.13888200  | 0.38555900  |

#### 4-F-5-CHO-substituted

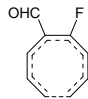

|   |             |             |             |
|---|-------------|-------------|-------------|
| C | -1.84131000 | -1.37416500 | -0.89755000 |
| C | -2.37252000 | -0.15096700 | 1.01277500  |
| C | -0.76066600 | -2.03719100 | -0.36902500 |
| C | 0.47861500  | -1.45107500 | -0.04384800 |
| C | 0.91900200  | -0.13415200 | -0.00519000 |
| C | 0.25100700  | 1.12425800  | -0.17105500 |
| C | -1.01403600 | 1.64915700  | -0.03644700 |
| C | -2.22458500 | 1.07282600  | 0.41432100  |
| H | -1.70298800 | -0.42970300 | -1.40628400 |
| H | -2.75651400 | -1.91477600 | -1.12223600 |
| H | -1.53326100 | -0.63458500 | 1.49357000  |
| H | -3.36026500 | -0.49307500 | 1.30789400  |
| H | -0.87609100 | -3.08596900 | -0.10298600 |
| H | 1.26262000  | -2.15093000 | 0.24055000  |
| H | -1.06828200 | 2.68396200  | -0.36556300 |
| H | -3.12343300 | 1.63634100  | 0.17058500  |
| F | 1.14382600  | 2.09635000  | -0.54785300 |
| C | 2.39268600  | -0.00688200 | 0.29452600  |
| H | 2.77095900  | 1.01129600  | 0.46968700  |
| O | 3.14045700  | -0.95507100 | 0.38180300  |

#### 4-F-5-CN-substituted

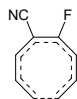

|   |             |             |             |
|---|-------------|-------------|-------------|
| C | 2.01934000  | 1.16420100  | -0.86646300 |
| C | 2.34147000  | -0.24056100 | 0.99570600  |
| C | 1.08980800  | 1.97846300  | -0.27416500 |
| C | -0.23973100 | 1.61870200  | 0.03427600  |
| C | -0.89845400 | 0.39327400  | 0.02061300  |
| C | -0.48883100 | -0.97141500 | -0.17668800 |
| C | 0.66347200  | -1.71478400 | -0.09110200 |
| C | 1.97067900  | -1.38131000 | 0.33824200  |
| H | 1.70860800  | 0.28673800  | -1.41797700 |
| H | 3.01763100  | 1.53838200  | -1.07453000 |
| H | 1.60628500  | 0.36228300  | 1.51175100  |
| H | 3.37875300  | -0.08724400 | 1.27865700  |
| H | 1.39838700  | 2.96953200  | 0.05113200  |
| H | -0.87554100 | 2.44433500  | 0.34532700  |
| H | 0.51584300  | -2.73538000 | -0.43562500 |
| H | 2.74915300  | -2.08264300 | 0.04342100  |
| F | -1.56423900 | -1.73785500 | -0.50937900 |
| C | -2.32699000 | 0.52050300  | 0.23632800  |
| N | -3.45793500 | 0.67746500  | 0.42596900  |

#### 4-F-5-NO<sub>2</sub>-substituted



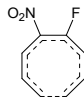

|   |             |             |             |
|---|-------------|-------------|-------------|
| C | 2.26014500  | 1.27384500  | -0.74673100 |
| C | 2.55284600  | -0.15631700 | 1.02306200  |
| C | 1.24260600  | 2.02018300  | -0.20343800 |
| C | -0.07157800 | 1.56119900  | 0.01858400  |
| C | -0.61059300 | 0.29256800  | -0.04120600 |
| C | -0.14237300 | -1.03266200 | -0.29967700 |
| C | 1.05367100  | -1.70394000 | -0.20616300 |
| C | 2.30431600  | -1.30549600 | 0.31568900  |
| H | 2.02862500  | 0.41747900  | -1.36596500 |
| H | 3.24309400  | 1.71542400  | -0.88307700 |
| H | 1.74727100  | 0.35194600  | 1.53623300  |
| H | 3.55818500  | 0.05585500  | 1.37486000  |
| H | 1.46544800  | 3.01607000  | 0.17237500  |
| H | -0.78783300 | 2.31951300  | 0.32409800  |
| H | 1.00075400  | -2.69806900 | -0.64300000 |
| H | 3.14826000  | -1.93335200 | 0.03719600  |
| F | -1.14265600 | -1.81613600 | -0.78253300 |
| N | -2.08476700 | 0.30804600  | 0.23405400  |
| O | -2.50049700 | -0.48820400 | 1.05172700  |
| O | -2.75710000 | 1.14417400  | -0.34035600 |

#### 4-CHO-5-CHO-substituted

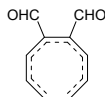

|   |             |             |             |
|---|-------------|-------------|-------------|
| C | 2.40384100  | 0.50883900  | -1.00740400 |
| C | 2.40404900  | -0.50850400 | 1.00731000  |
| C | 1.73534500  | 1.64268400  | -0.60104100 |
| C | 0.38525200  | 1.70500300  | -0.20358300 |
| C | -0.57244100 | 0.72282900  | 0.01890000  |
| C | -0.57232000 | -0.72289900 | -0.01882500 |
| C | 0.38550400  | -1.70492800 | 0.20374000  |
| C | 1.73564100  | -1.64242800 | 0.60102300  |
| H | 1.85299800  | -0.32461000 | -1.42089500 |
| H | 3.45424300  | 0.57012900  | -1.27954700 |
| H | 1.85316700  | 0.32487900  | 1.42088300  |
| H | 3.45449900  | -0.56966800 | 1.27929800  |
| H | 2.31022700  | 2.55750600  | -0.46793000 |
| H | 0.01257500  | 2.70675700  | 0.00214100  |
| H | 0.01294600  | -2.70674400 | -0.00189900 |
| H | 2.31061000  | -2.55719000 | 0.46787200  |
| C | -1.89545500 | -1.31366000 | -0.45157300 |
| H | -2.62115800 | -0.59979000 | -0.88532100 |
| O | -2.16858500 | -2.49111000 | -0.42002000 |
| C | -1.89567200 | 1.31339400  | 0.45166000  |
| H | -2.62116900 | 0.59946900  | 0.88566600  |
| O | -2.16909000 | 2.49077000  | 0.41983100  |

#### 4-CHO-5-CN-substituted

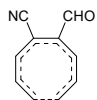

|   |             |             |             |
|---|-------------|-------------|-------------|
| C | -2.46680100 | -0.43068900 | -0.99663200 |
| C | -2.35033000 | 0.67863100  | 1.03605800  |
| C | -1.90001000 | -1.58755300 | -0.52404200 |
| C | -0.55213000 | -1.76186200 | -0.14201200 |
| C | 0.49746900  | -0.86044700 | 0.02596200  |
| C | 0.64224000  | 0.57876900  | -0.02882700 |
| C | -0.23542600 | 1.63670400  | 0.15835200  |
| C | -1.58659200 | 1.71409200  | 0.55676900  |
| H | -1.85084600 | 0.34705600  | -1.42616200 |
| H | -3.52073800 | -0.41223700 | -1.25981000 |
| H | -1.88122000 | -0.19911300 | 1.45837700  |
| H | -3.38680100 | 0.85170900  | 1.31298900  |
| H | -2.54949300 | -2.44203100 | -0.34374300 |
| H | -0.27998500 | -2.79220000 | 0.07518900  |
| H | 0.23157200  | 2.59580100  | -0.05921500 |
| H | -2.07181600 | 2.67426600  | 0.39130300  |
| C | 2.04189300  | 1.05204500  | -0.36347900 |
| H | 2.79810600  | 0.26650300  | -0.52687900 |
| O | 2.34812100  | 2.21529000  | -0.48201100 |
| C | 1.73248600  | -1.57485300 | 0.31542200  |
| N | 2.68420900  | -2.18301400 | 0.57265900  |

#### 4-CHO-5-NO<sub>2</sub>-substituted

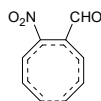

|   |             |             |             |
|---|-------------|-------------|-------------|
| C | -2.61350500 | -0.74414600 | -0.91056000 |
| C | -2.60197600 | 0.35678700  | 1.05696300  |
| C | -1.82131200 | -1.79205900 | -0.49916900 |
| C | -0.44922800 | -1.71522900 | -0.18833000 |
| C | 0.38468700  | -0.62319300 | -0.04023400 |
| C | 0.29471200  | 0.80802000  | -0.10936900 |
| C | -0.74822500 | 1.69758500  | 0.10111200  |
| C | -2.06882900 | 1.52549800  | 0.56114000  |
| H | -2.16678000 | 0.11344600  | -1.39387300 |
| H | -3.66690500 | -0.91471900 | -1.11479600 |
| H | -1.95101600 | -0.39660400 | 1.47911100  |
| H | -3.63874800 | 0.33061200  | 1.38119300  |
| H | -2.29666300 | -2.74772400 | -0.28874900 |
| H | 0.03448700  | -2.66604100 | 0.01322000  |
| H | -0.47988000 | 2.71816500  | -0.16412100 |
| H | -2.73636300 | 2.37239900  | 0.41352200  |
| N | 1.78299700  | -1.07161000 | 0.29973900  |
| O | 2.41398200  | -0.36192200 | 1.06523200  |
| O | 2.19737000  | -2.11338500 | -0.17415800 |
| C | 1.55482200  | 1.49909800  | -0.59952200 |
| H | 2.32760500  | 0.85030000  | -1.04676400 |
| O | 1.70195000  | 2.69621600  | -0.59221100 |

#### 4-CN-5-CN-substituted

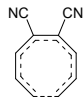

|   |             |             |             |
|---|-------------|-------------|-------------|
| C | -2.41788100 | 0.62374100  | 0.98750000  |
| C | -2.41788000 | -0.62373100 | -0.98750800 |
| C | -1.75464300 | 1.68971300  | 0.43837800  |
| C | -0.39275500 | 1.72014100  | 0.06387000  |
| C | 0.57079200  | 0.72355900  | -0.05291700 |
| C | 0.57078200  | -0.72355400 | 0.05290700  |
| C | -0.39277900 | -1.72012900 | -0.06383500 |
| C | -1.75465000 | -1.68971300 | -0.43839600 |
| H | -1.87181600 | -0.17783200 | 1.46582300  |
| H | -3.46989500 | 0.71127500  | 1.24404400  |
| H | -1.87180200 | 0.17783400  | -1.46583100 |
| H | -3.46989100 | -0.71125700 | -1.24406400 |
| H | -2.32508900 | 2.58478100  | 0.19897500  |
| H | -0.01979300 | 2.70933200  | -0.19089700 |
| H | -0.01984000 | -2.70930200 | 0.19103400  |
| C | 1.88388500  | 1.28463300  | -0.31711600 |
| N | 2.90720500  | 1.77651700  | -0.54249900 |
| H | -2.32510600 | -2.58477700 | -0.19899400 |
| C | 1.88387400  | -1.28464300 | 0.31711100  |
| N | 2.90718800  | -1.77654000 | 0.54249200  |

#### 4-CN-5-NO<sub>2</sub>-substituted

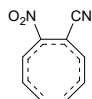

|   |             |             |             |
|---|-------------|-------------|-------------|
| C | -2.58482400 | -0.77663600 | -0.93713900 |
| C | -2.64368300 | 0.37655100  | 1.01531300  |
| C | -1.75965700 | -1.77624400 | -0.47907800 |
| C | -0.39336300 | -1.63863100 | -0.15825500 |
| C | 0.40437900  | -0.52212200 | -0.01497600 |
| C | 0.25151100  | 0.90610200  | -0.10212800 |
| C | -0.83171100 | 1.76713200  | 0.05295900  |
| C | -2.15371500 | 1.54875700  | 0.48854700  |
| H | -2.16612000 | 0.08682200  | -1.43528300 |
| H | -3.62782200 | -0.99388400 | -1.15002100 |
| H | -1.96885800 | -0.33889700 | 1.46538900  |
| H | -3.68379600 | 0.31541400  | 1.32288100  |
| H | -2.19876600 | -2.74458400 | -0.24886800 |
| H | 0.12640400  | -2.56862200 | 0.05218800  |
| H | -0.61043400 | 2.79288200  | -0.23126800 |
| H | -2.85144500 | 2.36189000  | 0.30003200  |
| C | 1.45165400  | 1.62353600  | -0.49575400 |
| N | 2.35539900  | 2.24172100  | -0.87022000 |
| N | 1.81644200  | -0.92065600 | 0.32464500  |
| O | 2.37961400  | -0.25673400 | 1.17315800  |
| O | 2.28718700  | -1.89440900 | -0.23227800 |

#### 4-NO<sub>2</sub>-5-NO<sub>2</sub>-substituted

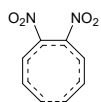

|   |             |             |             |
|---|-------------|-------------|-------------|
| C | -2.78686600 | -0.52414000 | -0.96527000 |
| C | -2.78697100 | 0.52311900  | 0.96568900  |
| C | -2.11621800 | -1.65363300 | -0.54119800 |
| C | -0.76090300 | -1.71321000 | -0.16822100 |
| C | 0.17121400  | -0.71333800 | 0.02148900  |
| C | 0.17094900  | 0.71370800  | -0.02132100 |
| C | -0.76192200 | 1.71305300  | 0.16751800  |
| C | -2.11705700 | 1.65281700  | 0.54100500  |
| H | -2.23920700 | 0.27565600  | -1.44511200 |
| H | -3.84106300 | -0.59414300 | -1.21901400 |
| H | -2.23868600 | -0.27630500 | 1.44546100  |
| H | -3.84108800 | 0.59266800  | 1.21988200  |
| H | -2.69212300 | -2.55797100 | -0.35750900 |
| H | -0.38133900 | -2.70413200 | 0.06165400  |
| H | -0.38333500 | 2.70409400  | -0.06346000 |
| H | -2.69350900 | 2.55679600  | 0.35726200  |
| N | 1.49819200  | -1.27728000 | 0.46155600  |
| O | 2.12372000  | -0.61339200 | 1.26765300  |
| O | 1.83097800  | -2.36496200 | 0.03951900  |
| N | 1.49768500  | 1.27787700  | -0.46135000 |
| O | 2.12401800  | 0.61285700  | -1.26579800 |
| O | 1.82951500  | 2.36660900  | -0.04121900 |
